# Supplementary material for: Global, Regional, and National Burden of Cardiovascular Diseases for 10 Causes, 1990 to 2015
Source: PubMed Central journal article supplement (PMC5491406; doi:10.1016/j.jacc.2017.04.052), 2017-07-04

# Supplementary Results to Global, Regional, and National Burden of Cardiovascular Diseases for 10 Causes, 1990–2015

This document provides supplementary results for incidence, prevalence, and years of life lived with disability. Further methodological details can be found in the appendix document provided in a separate on-line file.

## Supplementary Results: Tables & Figures

### Tables:

eTable 1. Global and Regional YLLs for all CVD causes, total number and age-standardized rate, by sex and total, for 2015

eTable 2. Global and Regional YLDs for all CVD causes, total number and age-standardized rate, by sex and total, for 2015

eTable 3a. Prevalence of CVD Causes for Years 1990-2000, with Upper and Lower Uncertainty Bounds

eTable 3b. Prevalence of CVD Causes for Years 2005-2015, with Upper and Lower Uncertainty Bounds

eTable 4a. All-ages Prevalence for men and women separately and combined, for all CVD level 3 and 4 subcauses, by country in 1990 and 2015

eTable 4b. All-ages Mortality rate for men and women separately and combined, for all CVD level 3 and 4 subcauses, by country in 1990 and 2015

eTable 4c. All-ages DALY rate for men and women separately and combined, for all CVD level 3 and 4 subcauses, by country in 1990 and 2015

### Figures:

eFigure 1a. Global country map, CVD data availability in GBD modeling, by sources for fatal modelling

eFigure 1b. Global country map, CVD data availability in GBD modeling, by sources for nonfatal modelling

eFigure 2a. Global country map, percentage change in age-standardized prevalence of CVD, 1990-2015

eFigure 2b. Global country map, percentage change in age-standardized death rate of CVD, 1990-2015

eFigure 3. Ranking of age-standardized DALYs per 100,000, both sexes combined, for CVD level 3 and 4 causes globally and for 21 GDB world regions.

eFigure 4a. Prevalence of CVD level 3 and 4 causes in 2015, by age categories

eFigure 4b. Death rate for CVD level 3 and 4 causes in 2015, by age categories.

eFigure 5a. Age-Standardized Prevalence of IHD per 100,000 persons in 2015, Both Sexes

eFigure 5b. Age-Standardized Prevalence of HHD per 100,000 persons in 2015, Both Sexes

eFigure 5c. Age-Standardized Prevalence of Ischemic Stroke per 100,000 persons in 2015, Both Sexes

eFigure 5d. Age-Standardized Prevalence of Hemorrhagic Stroke per 100,000 persons in 2015, Both Sexes

eFigure 6a. Age-Standardized Deaths due to IHD per 100,000 persons in 2015, Both Sexes

eFigure 6b. Age-Standardized Deaths due to HHD per 100,000 persons in 2015, Both Sexes

eFigure 6c. Age-Standardized Deaths due to Ischemic Stroke per 100,000 persons in 2015, Both Sexes

eFigure 6d. Age-Standardized Deaths due to Hemorrhagic Stroke per 100,000 persons in 2015, Both Sexes

eFigure 7a. Trends in Age-Standardized Incidence Rates for MI, 1990 – 2015

eFigure 7b. Trends in Age-Standardized Incidence Rates for Stroke, 1990 - 2015

eFigure 8a. Age-Standardized Prevalence of All Cardiovascular Disease per 100,000 persons in 2015, Female

eFigure 8b. Age-Standardized All Cardiovascular Disease, Deaths per 100,000 persons in 2015, Female

eFigure 9a. Age-Standardized Prevalence of All Cardiovascular Disease per 100,000 persons in 2015, Male

eFigure 9b. Age-Standardized All Cardiovascular Disease, Deaths per 100,000 persons in 2015, Male

**eTable 1: 2015 Global and Regional YLLs for all CVD level 3 and 4 subcauses including 95% uncertainty, total number and age-standardized rate, by sex and total for 2015**

|                                | Years of Life Lost (YLLs)                   |                                             |                                             |                                |                             |                              |
|--------------------------------|---------------------------------------------|---------------------------------------------|---------------------------------------------|--------------------------------|-----------------------------|------------------------------|
|                                | All Ages                                    |                                             |                                             | Age-standardized (per 100,000) |                             |                              |
|                                | Total                                       | Female                                      | Male                                        | Total                          | Female                      | Male                         |
| <b>Cardiovascular diseases</b> |                                             |                                             |                                             |                                |                             |                              |
| Global                         | 321,908,774<br>(314,611,139 to 330,169,998) | 129,774,606<br>(126,143,935 to 134,198,007) | 192,134,169<br>(186,574,029 to 197,861,686) | 4,799<br>(4,697 to 4,917)      | 3,670<br>(3,568 to 3,793)   | 6,022<br>(5,858 to 6,191)    |
| Andean Latin America           | 1,098,336<br>(1,025,287 to 1,181,538)       | 491,812<br>(441,350 to 545,379)             | 606,524<br>(548,444 to 669,754)             | 2,433<br>(2,275 to 2,617)      | 2,078<br>(1,863 to 2,309)   | 2,815<br>(2,558 to 3,096)    |
| Australasia                    | 716,222<br>(699,515 to 733,145)             | 293,208<br>(283,498 to 303,378)             | 423,013<br>(410,813 to 437,411)             | 1,759<br>(1,719 to 1,802)      | 1,265<br>(1,225 to 1,306)   | 2,288<br>(2,223 to 2,365)    |
| Caribbean                      | 2,080,491<br>(1,947,121 to 2,212,360)       | 982,547<br>(882,084 to 1,094,590)           | 1,097,944<br>(1,019,913 to 1,179,207)       | 4,766<br>(4,464 to 5,064)      | 4,225<br>(3,788 to 4,713)   | 5,359<br>(4,990 to 5,736)    |
| Central Asia                   | 5,641,225<br>(5,469,201 to 5,812,266)       | 2,282,527<br>(2,181,564 to 2,375,248)       | 3,358,698<br>(3,232,703 to 3,491,623)       | 8,846<br>(8,601 to 9,100)      | 6,482<br>(6,209 to 6,740)   | 11,842<br>(11,448 to 12,256) |
| Central Europe                 | 8,866,985<br>(8,703,497 to 9,010,743)       | 3,824,322<br>(3,744,969 to 3,903,144)       | 5,042,663<br>(4,935,331 to 5,147,908)       | 4,851<br>(4,755 to 4,932)      | 3,389<br>(3,317 to 3,461)   | 6,637<br>(6,494 to 6,775)    |
| Central Latin America          | 5,565,138<br>(5,415,548 to 5,703,801)       | 2,376,855<br>(2,292,221 to 2,454,390)       | 3,188,282<br>(3,075,014 to 3,304,211)       | 2,934<br>(2,856 to 3,005)      | 2,368<br>(2,285 to 2,443)   | 3,567<br>(3,446 to 3,692)    |
| Central Sub-Saharan Africa     | 3,585,086<br>(2,408,690 to 5,156,965)       | 1,921,944<br>(1,197,528 to 2,931,182)       | 1,663,141<br>(1,069,309 to 2,533,605)       | 7,479<br>(4,998 to 10,525)     | 7,822<br>(4,828 to 11,636)  | 6,985<br>(4,449 to 10,415)   |
| East Asia                      | 67,779,410<br>(64,663,651 to 71,288,604)    | 24,453,325<br>(22,974,498 to 26,051,655)    | 43,326,085<br>(40,763,048 to 46,205,250)    | 4,469<br>(4,276 to 4,687)      | 3,212<br>(3,029 to 3,413)   | 5,775<br>(5,458 to 6,126)    |
| Eastern Europe                 | 27,990,267<br>(27,373,275 to 28,673,806)    | 12,378,113<br>(12,039,991 to 12,765,749)    | 15,612,154<br>(15,146,776 to 16,089,527)    | 8,919<br>(8,708 to 9,145)      | 5,931<br>(5,762 to 6,129)   | 13,155<br>(12,774 to 13,541) |
| Eastern Sub-Saharan Africa     | 9,746,534<br>(8,042,783 to 11,771,553)      | 4,588,583<br>(3,483,341 to 5,924,471)       | 5,157,951<br>(3,996,260 to 6,604,100)       | 6,169<br>(5,103 to 7,435)      | 5,734<br>(4,375 to 7,356)   | 6,623<br>(5,209 to 8,486)    |
| High-income Asia Pacific       | 5,300,784<br>(5,189,637 to 5,413,472)       | 2,205,736<br>(2,145,129 to 2,267,540)       | 3,095,048<br>(3,022,068 to 3,172,413)       | 1,490<br>(1,460 to 1,520)      | 995<br>(969 to 1,022)       | 2,043<br>(1,992 to 2,093)    |
| High-income North America      | 12,862,962<br>(12,673,756 to 13,058,807)    | 5,229,519<br>(5,111,188 to 5,356,040)       | 7,633,442<br>(7,492,675 to 7,767,166)       | 2,577<br>(2,540 to 2,614)      | 1,875<br>(1,834 to 1,917)   | 3,359<br>(3,296 to 3,416)    |
| North Africa and Middle East   | 23,806,196<br>(22,485,264 to 25,346,872)    | 10,308,648<br>(9,479,239 to 11,264,681)     | 13,497,548<br>(12,629,180 to 14,504,293)    | 6,401<br>(6,072 to 6,772)      | 5,516<br>(5,098 to 5,981)   | 7,314<br>(6,859 to 7,807)    |
| Oceania                        | 785,332<br>(575,442 to 1,096,141)           | 362,751<br>(259,582 to 508,644)             | 422,581<br>(311,116 to 595,000)             | 11,279<br>(8,480 to 15,249)    | 10,371<br>(7,651 to 14,160) | 12,143<br>(9,238 to 16,350)  |
| South Asia                     | 80,871,510<br>(77,305,676 to 84,772,737)    | 30,214,506<br>(28,284,664 to 32,444,411)    | 50,657,004<br>(47,808,373 to 53,989,680)    | 6,797<br>(6,518 to 7,093)      | 5,258<br>(4,938 to 5,608)   | 8,320<br>(7,877 to 8,834)    |
| Southeast Asia                 | 28,413,937<br>(25,627,169 to 31,070,862)    | 11,535,433<br>(10,102,974 to 13,047,334)    | 16,878,504<br>(14,733,209 to 19,149,637)    | 5,593<br>(5,080 to 6,084)      | 4,368<br>(3,856 to 4,883)   | 6,972<br>(6,116 to 7,797)    |
| Southern Latin America         | 2,296,134<br>(2,240,465 to 2,353,203)       | 968,043<br>(932,315 to 1,004,349)           | 1,328,091<br>(1,283,544 to 1,370,949)       | 3,226<br>(3,147 to 3,305)      | 2,285<br>(2,197 to 2,371)   | 4,374<br>(4,230 to 4,514)    |
| Southern Sub-Saharan Africa    | 2,637,407<br>(2,366,098 to 2,987,332)       | 1,310,401<br>(1,132,658 to 1,538,681)       | 1,327,006<br>(1,167,803 to 1,523,246)       | 5,634<br>(5,081 to 6,337)      | 4,945<br>(4,291 to 5,799)   | 6,404<br>(5,720 to 7,259)    |
| Tropical Latin America         | 8,017,664<br>(7,677,663 to 8,425,560)       | 3,345,056<br>(3,170,109 to 3,568,099)       | 4,672,608<br>(4,415,883 to 4,953,414)       | 4,213<br>(4,037 to 4,424)      | 3,230<br>(3,064 to 3,443)   | 5,414<br>(5,129 to 5,732)    |
| Western Europe                 | 15,658,936<br>(15,351,118 to 15,939,637)    | 6,709,801<br>(6,536,136 to 6,875,476)       | 8,949,135<br>(8,765,448 to 9,142,915)       | 1,983<br>(1,945 to 2,017)      | 1,373<br>(1,342 to 1,403)   | 2,666<br>(2,612 to 2,722)    |
| Western Sub-Saharan Africa     | 8,188,218<br>(6,999,015 to 9,892,755)       | 3,991,473<br>(3,159,494 to 5,308,391)       | 4,196,745<br>(3,460,006 to 5,292,931)       | 4,895<br>(4,186 to 5,870)      | 4,880<br>(3,895 to 6,478)   | 4,869<br>(4,028 to 6,059)    |
| <b>Aortic Aneurysm</b>         |                                             |                                             |                                             |                                |                             |                              |
| Global                         | 2,930,176<br>(2,846,030 to 3,007,029)       | 899,228<br>(871,473 to 932,501)             | 2,030,948<br>(1,964,364 to 2,090,492)       | 44<br>(43 to 45)               | 25<br>(25 to 26)            | 65<br>(63 to 67)             |
| Andean Latin America           | 12,585<br>(11,138 to 14,097)                | 4,567<br>(3,987 to 5,224)                   | 8,019<br>(6,758 to 9,246)                   | 28<br>(25 to 32)               | 19<br>(17 to 22)            | 39<br>(33 to 45)             |
| Australasia                    | 24,211<br>(22,595 to 25,889)                | 8,606<br>(7,746 to 9,504)                   | 15,605<br>(14,243 to 17,134)                | 61<br>(57 to 65)               | 40<br>(36 to 43)            | 84<br>(77 to 92)             |
| Caribbean                      | 25,781<br>(24,215 to 27,552)                | 7,959<br>(7,315 to 8,788)                   | 17,822<br>(16,443 to 19,509)                | 60<br>(56 to 64)               | 34<br>(32 to 38)            | 89<br>(82 to 97)             |

|                                        |                                       |                                   |                                   |                    |                       |                     |
|----------------------------------------|---------------------------------------|-----------------------------------|-----------------------------------|--------------------|-----------------------|---------------------|
| Central Asia                           | 27,560<br>(23,304 to 30,780)          | 7,298<br>(5,800 to 9,309)         | 20,262<br>(17,307 to 22,103)      | 42<br>(35 to 47)   | 20<br>(16 to 25)      | 71<br>(61 to 77)    |
| Central Europe                         | 101,420<br>(95,749 to 105,432)        | 30,241<br>(28,502 to 32,015)      | 71,179<br>(65,585 to 75,091)      | 59<br>(55 to 61)   | 31<br>(29 to 33)      | 93<br>(86 to 98)    |
| Central Latin America                  | 60,176<br>(56,890 to 63,077)          | 16,386<br>(15,337 to 17,464)      | 43,790<br>(40,970 to 46,351)      | 32<br>(30 to 33)   | 16<br>(15 to 17)      | 51<br>(47 to 54)    |
| Central Sub-Saharan Africa             | 23,735<br>(15,005 to 37,729)          | 7,730<br>(4,356 to 12,639)        | 16,005<br>(9,326 to 26,370)       | 50<br>(33 to 77)   | 33<br>(19 to 52)      | 71<br>(44 to 111)   |
| East Asia                              | 302,404<br>(280,757 to 324,400)       | 78,292<br>(70,994 to 86,861)      | 224,112<br>(202,559 to 245,617)   | 19<br>(18 to 20)   | 9.8<br>(8.9 to 10.8)  | 28<br>(25 to 31)    |
| Eastern Europe                         | 203,891<br>(190,811 to 216,157)       | 61,110<br>(56,478 to 65,684)      | 142,780<br>(130,820 to 153,768)   | 67<br>(63 to 71)   | 32<br>(30 to 35)      | 119<br>(109 to 127) |
| Eastern Sub-Saharan Africa             | 78,000<br>(58,006 to 108,049)         | 19,954<br>(13,486 to 29,011)      | 58,046<br>(40,346 to 84,426)      | 47<br>(35 to 65)   | 24<br>(16 to 37)      | 73<br>(51 to 105)   |
| High-income Asia Pacific               | 228,801<br>(221,791 to 236,082)       | 91,092<br>(87,233 to 94,993)      | 137,708<br>(131,515 to 144,342)   | 63<br>(61 to 65)   | 41<br>(39 to 43)      | 89<br>(85 to 93)    |
| High-income North America              | 234,435<br>(225,221 to 244,889)       | 77,722<br>(73,380 to 82,343)      | 156,712<br>(148,839 to 166,186)   | 48<br>(46 to 50)   | 29<br>(27 to 31)      | 70<br>(66 to 74)    |
| North Africa and Middle East           | 152,629<br>(143,208 to 162,809)       | 47,728<br>(43,607 to 52,284)      | 104,901<br>(96,892 to 113,880)    | 41<br>(38 to 43)   | 26<br>(24 to 29)      | 55<br>(52 to 60)    |
| Oceania                                | 5,830<br>(3,945 to 9,217)             | 1,995<br>(1,438 to 3,057)         | 3,835<br>(2,343 to 6,728)         | 90<br>(64 to 137)  | 64<br>(48 to 94)      | 119<br>(77 to 195)  |
| South Asia                             | 480,181<br>(448,513 to 519,337)       | 130,414<br>(119,937 to 143,263)   | 349,766<br>(321,139 to 387,382)   | 39<br>(36 to 42)   | 20<br>(19 to 22)      | 58<br>(53 to 64)    |
| Southeast Asia                         | 197,924<br>(164,414 to 232,693)       | 67,736<br>(54,227 to 82,227)      | 130,188<br>(106,201 to 155,334)   | 41<br>(34 to 47)   | 25<br>(21 to 30)      | 60<br>(49 to 71)    |
| Southern Latin America                 | 61,616<br>(58,094 to 65,134)          | 19,777<br>(18,197 to 21,499)      | 41,839<br>(38,534 to 44,961)      | 87<br>(82 to 92)   | 47<br>(44 to 51)      | 138<br>(127 to 148) |
| Southern Sub-Saharan Africa            | 31,069<br>(27,606 to 35,300)          | 8,326<br>(7,002 to 9,865)         | 22,743<br>(19,548 to 26,254)      | 66<br>(59 to 74)   | 30<br>(25 to 35)      | 117<br>(102 to 134) |
| Tropical Latin America                 | 202,654<br>(187,210 to 219,084)       | 71,091<br>(65,279 to 77,825)      | 131,564<br>(118,115 to 145,091)   | 105<br>(97 to 113) | 67<br>(62 to 74)      | 151<br>(136 to 166) |
| Western Europe                         | 437,348<br>(420,085 to 456,680)       | 129,120<br>(123,072 to 135,654)   | 308,229<br>(292,626 to 325,772)   | 58<br>(56 to 61)   | 29<br>(28 to 31)      | 92<br>(87 to 97)    |
| Western Sub-Saharan Africa             | 37,925<br>(30,751 to 49,272)          | 12,085<br>(8,305 to 17,995)       | 25,841<br>(20,253 to 35,181)      | 23<br>(19 to 29)   | 15<br>(11 to 21)      | 32<br>(26 to 43)    |
| <b>Atrial fibrillation and flutter</b> |                                       |                                   |                                   |                    |                       |                     |
| Global                                 | 1,799,111<br>(1,518,144 to 2,126,610) | 913,787<br>(769,001 to 1,078,533) | 885,324<br>(745,353 to 1,050,012) | 30<br>(25 to 35)   | 26<br>(22 to 31)      | 35<br>(29 to 41)    |
| Andean Latin America                   | 9,338<br>(7,169 to 11,948)            | 4,081<br>(3,147 to 5,250)         | 5,257<br>(3,968 to 6,816)         | 24<br>(18 to 31)   | 18<br>(14 to 24)      | 31<br>(23 to 40)    |
| Australasia                            | 13,483<br>(10,976 to 16,227)          | 6,362<br>(5,175 to 7,808)         | 7,121<br>(5,771 to 8,682)         | 31<br>(26 to 37)   | 26<br>(21 to 31)      | 37<br>(30 to 45)    |
| Caribbean                              | 10,997<br>(8,460 to 13,970)           | 4,886<br>(3,729 to 6,174)         | 6,111<br>(4,670 to 7,826)         | 26<br>(20 to 32)   | 20<br>(15 to 25)      | 33<br>(25 to 42)    |
| Central Asia                           | 20,418<br>(16,234 to 25,569)          | 11,442<br>(8,995 to 14,469)       | 8,976<br>(7,258 to 11,206)        | 38<br>(30 to 48)   | 36<br>(28 to 45)      | 42<br>(33 to 53)    |
| Central Europe                         | 85,592<br>(72,765 to 99,702)          | 49,270<br>(41,382 to 58,106)      | 36,323<br>(31,054 to 41,903)      | 44<br>(37 to 51)   | 40<br>(34 to 48)      | 49<br>(42 to 56)    |
| Central Latin America                  | 39,938<br>(30,985 to 50,146)          | 17,715<br>(13,876 to 22,240)      | 22,223<br>(17,260 to 27,911)      | 24<br>(19 to 31)   | 19<br>(15 to 24)      | 32<br>(24 to 41)    |
| Central Sub-Saharan Africa             | 6,308<br>(3,980 to 9,111)             | 2,909<br>(1,609 to 4,626)         | 3,399<br>(2,067 to 5,221)         | 23<br>(14 to 33)   | 19<br>(11 to 31)      | 29<br>(18 to 44)    |
| East Asia                              | 316,838<br>(254,057 to 383,833)       | 148,661<br>(119,216 to 181,534)   | 168,177<br>(134,852 to 204,575)   | 25<br>(20 to 31)   | 22<br>(17 to 27)      | 29<br>(23 to 36)    |
| Eastern Europe                         | 118,820<br>(93,185 to 150,727)        | 77,975<br>(60,664 to 98,874)      | 40,845<br>(32,589 to 51,921)      | 35<br>(28 to 44)   | 33<br>(26 to 42)      | 38<br>(30 to 48)    |
| Eastern Sub-Saharan Africa             | 17,168<br>(12,943 to 22,070)          | 6,658<br>(4,535 to 9,196)         | 10,510<br>(7,809 to 14,030)       | 18<br>(13 to 23)   | 12.6<br>(8.5 to 17.4) | 24<br>(17 to 32)    |
| High-income Asia Pacific               | 73,873<br>(56,652 to 93,235)          | 28,788<br>(22,066 to 37,117)      | 45,085<br>(34,840 to 56,712)      | 17<br>(13 to 20)   | 10.2<br>(7.9 to 12.9) | 26<br>(20 to 32)    |

|                                       |                                       |                                       |                                       |                     |                       |                           |
|---------------------------------------|---------------------------------------|---------------------------------------|---------------------------------------|---------------------|-----------------------|---------------------------|
| High-income North America             | 210,113<br>(183,645 to 237,601)       | 115,890<br>(100,469 to 133,281)       | 94,222<br>(83,192 to 106,477)         | 38<br>(34 to 43)    | 36<br>(31 to 40)      | 41<br>(36 to 47)          |
| North Africa and Middle East          | 79,793<br>(63,912 to 98,670)          | 41,875<br>(32,905 to 52,259)          | 37,918<br>(30,381 to 47,280)          | 31<br>(24 to 39)    | 30<br>(23 to 37)      | 33<br>(26 to 43)          |
| Oceania                               | 1,127<br>(828 to 1,498)               | 574<br>(420 to 778)                   | 553<br>(400 to 732)                   | 32<br>(23 to 42)    | 28<br>(21 to 39)      | 37<br>(27 to 50)          |
| South Asia                            | 218,996<br>(174,949 to 268,245)       | 82,607<br>(65,554 to 102,418)         | 136,390<br>(107,802 to 167,033)       | 27<br>(21 to 34)    | 20<br>(15 to 25)      | 36<br>(28 to 45)          |
| Southeast Asia                        | 107,962<br>(84,033 to 134,451)        | 56,687<br>(44,069 to 71,820)          | 51,274<br>(39,430 to 64,782)          | 30<br>(23 to 38)    | 26<br>(20 to 34)      | 35<br>(26 to 45)          |
| Southern Latin America                | 26,620<br>(20,778 to 33,386)          | 13,280<br>(10,143 to 17,042)          | 13,340<br>(10,491 to 16,784)          | 35<br>(28 to 44)    | 28<br>(21 to 35)      | 47<br>(37 to 59)          |
| Southern Sub-Saharan Africa           | 5,254<br>(4,108 to 6,630)             | 2,654<br>(2,028 to 3,419)             | 2,600<br>(2,023 to 3,295)             | 14<br>(11 to 18)    | 11.1<br>(8.5 to 14.4) | 20<br>(15 to 25)          |
| Tropical Latin America                | 38,944<br>(30,713 to 48,220)          | 18,219<br>(14,431 to 22,811)          | 20,725<br>(16,477 to 26,003)          | 25<br>(19 to 31)    | 19<br>(15 to 24)      | 33<br>(26 to 42)          |
| Western Europe                        | 387,163<br>(324,622 to 461,813)       | 218,805<br>(182,237 to 262,646)       | 168,358<br>(141,089 to 200,261)       | 41<br>(35 to 49)    | 38<br>(32 to 45)      | 46<br>(38 to 54)          |
| Western Sub-Saharan Africa            | 10,366<br>(7,903 to 13,689)           | 4,449<br>(3,261 to 6,216)             | 5,918<br>(4,362 to 7,971)             | 13<br>(10 to 18)    | 10.8<br>(7.8 to 15.0) | 16<br>(12 to 22)          |
| <b>Cardiomyopathy and myocarditis</b> |                                       |                                       |                                       |                     |                       |                           |
| Global                                | 8,945,221<br>(8,513,808 to 9,431,718) | 3,257,555<br>(3,128,826 to 3,424,308) | 5,687,666<br>(5,196,369 to 6,090,516) | 126<br>(120 to 133) | 90<br>(86 to 95)      | 163<br>(149 to 174)       |
| Andean Latin America                  | 28,905<br>(25,139 to 35,424)          | 12,393<br>(10,622 to 14,563)          | 16,512<br>(13,762 to 22,138)          | 55<br>(48 to 68)    | 46<br>(40 to 54)      | 64<br>(54 to 86)          |
| Australasia                           | 27,013<br>(25,382 to 28,728)          | 7,505<br>(6,928 to 8,219)             | 19,507<br>(18,011 to 21,225)          | 76<br>(72 to 81)    | 40<br>(37 to 44)      | 114<br>(105 to 123)       |
| Caribbean                             | 68,656<br>(61,156 to 78,232)          | 30,684<br>(26,080 to 36,975)          | 37,972<br>(33,242 to 44,462)          | 155<br>(138 to 176) | 135<br>(114 to 163)   | 175<br>(153 to 205)       |
| Central Asia                          | 113,722<br>(104,734 to 125,763)       | 32,243<br>(29,678 to 34,897)          | 81,479<br>(73,353 to 91,926)          | 141<br>(130 to 155) | 78<br>(71 to 84)      | 211<br>(190 to 239)       |
| Central Europe                        | 502,878<br>(479,080 to 523,721)       | 196,440<br>(185,438 to 208,694)       | 306,438<br>(286,071 to 324,727)       | 292<br>(278 to 304) | 185<br>(175 to 195)   | 415<br>(387 to 440)       |
| Central Latin America                 | 130,025<br>(122,942 to 140,554)       | 48,751<br>(46,205 to 51,535)          | 81,273<br>(75,312 to 90,191)          | 58<br>(55 to 62)    | 42<br>(40 to 45)      | 74<br>(68 to 81)          |
| Central Sub-Saharan Africa            | 138,730<br>(97,245 to 192,462)        | 67,041<br>(40,671 to 98,823)          | 71,689<br>(46,680 to 105,953)         | 159<br>(108 to 233) | 139<br>(87 to 212)    | 179<br>(110 to 282)       |
| East Asia                             | 833,920<br>(694,140 to 900,536)       | 310,369<br>(283,580 to 342,986)       | 523,551<br>(379,608 to 581,839)       | 60<br>(50 to 65)    | 48<br>(44 to 54)      | 72<br>(52 to 81)          |
| Eastern Europe                        | 2,244,117<br>(2,107,170 to 2,392,986) | 619,352<br>(574,113 to 665,586)       | 1,624,766<br>(1,502,119 to 1,775,718) | 833<br>(780 to 889) | 403<br>(374 to 433)   | 1,336<br>(1,230 to 1,455) |
| Eastern Sub-Saharan Africa            | 227,532<br>(165,422 to 300,844)       | 85,437<br>(61,728 to 114,202)         | 142,095<br>(96,556 to 202,246)        | 99<br>(70 to 131)   | 71<br>(48 to 100)     | 129<br>(84 to 184)        |
| High-income Asia Pacific              | 132,101<br>(126,822 to 137,518)       | 56,560<br>(53,859 to 59,499)          | 75,542<br>(71,619 to 79,766)          | 50<br>(48 to 52)    | 36<br>(34 to 38)      | 63<br>(60 to 67)          |
| High-income North America             | 591,718<br>(568,474 to 617,154)       | 202,873<br>(192,314 to 213,801)       | 388,845<br>(368,036 to 412,690)       | 135<br>(130 to 141) | 89<br>(84 to 93)      | 186<br>(176 to 197)       |
| North Africa and Middle East          | 1,028,757<br>(922,601 to 1,125,627)   | 429,606<br>(383,298 to 477,938)       | 599,151<br>(488,814 to 670,406)       | 211<br>(191 to 230) | 174<br>(158 to 192)   | 247<br>(209 to 281)       |
| Oceania                               | 29,229<br>(19,630 to 43,044)          | 15,335<br>(9,789 to 22,689)           | 13,894<br>(8,973 to 20,847)           | 333<br>(229 to 477) | 338<br>(224 to 494)   | 331<br>(219 to 484)       |
| South Asia                            | 781,345<br>(663,199 to 854,374)       | 353,498<br>(310,503 to 401,368)       | 427,847<br>(292,553 to 492,764)       | 48<br>(42 to 52)    | 43<br>(38 to 49)      | 52<br>(39 to 60)          |
| Southeast Asia                        | 529,838<br>(456,906 to 635,823)       | 203,076<br>(171,541 to 241,610)       | 326,761<br>(266,653 to 421,538)       | 91<br>(79 to 108)   | 69<br>(58 to 81)      | 114<br>(94 to 148)        |
| Southern Latin America                | 95,805<br>(90,526 to 101,345)         | 31,500<br>(29,173 to 34,180)          | 64,305<br>(59,500 to 69,482)          | 139<br>(132 to 147) | 81<br>(75 to 87)      | 208<br>(193 to 225)       |
| Southern Sub-Saharan Africa           | 198,514<br>(172,227 to 231,334)       | 88,156<br>(73,678 to 106,308)         | 110,358<br>(91,517 to 132,099)        | 344<br>(300 to 398) | 279<br>(235 to 334)   | 424<br>(355 to 508)       |
| Tropical Latin America                | 450,303<br>(396,102 to 494,200)       | 160,611<br>(148,364 to 175,409)       | 289,692<br>(231,173 to 325,195)       | 228<br>(201 to 251) | 156<br>(144 to 170)   | 311<br>(250 to 350)       |

|                                     |                                          |                                          |                                          |                           |                           |                           |
|-------------------------------------|------------------------------------------|------------------------------------------|------------------------------------------|---------------------------|---------------------------|---------------------------|
| Western Europe                      | 589,598<br>(564,719 to 615,490)          | 228,541<br>(215,054 to 243,072)          | 361,057<br>(341,636 to 382,881)          | 84<br>(80 to 87)          | 52<br>(49 to 54)          | 117<br>(111 to 124)       |
| Western Sub-Saharan Africa          | 202,515<br>(164,610 to 255,554)          | 77,583<br>(56,273 to 105,659)            | 124,932<br>(97,179 to 167,947)           | 77<br>(62 to 99)          | 55<br>(41 to 77)          | 100<br>(77 to 140)        |
| <b>Endocarditis</b>                 |                                          |                                          |                                          |                           |                           |                           |
| Global                              | 2,197,934<br>(1,824,900 to 2,410,635)    | 1,055,438<br>(809,456 to 1,203,411)      | 1,142,496<br>(903,571 to 1,337,854)      | 31<br>(26 to 34)          | 29<br>(22 to 33)          | 33<br>(26 to 38)          |
| Andean Latin America                | 21,466<br>(17,390 to 26,563)             | 9,746<br>(7,468 to 13,501)               | 11,720<br>(8,319 to 15,832)              | 40<br>(32 to 50)          | 36<br>(27 to 49)          | 45<br>(31 to 59)          |
| Australasia                         | 5,905<br>(5,421 to 6,382)                | 2,602<br>(2,320 to 2,931)                | 3,303<br>(2,958 to 3,665)                | 16<br>(15 to 17)          | 13<br>(12 to 15)          | 19<br>(17 to 21)          |
| Caribbean                           | 18,046<br>(15,544 to 21,224)             | 9,628<br>(7,580 to 12,672)               | 8,418<br>(6,782 to 10,229)               | 41<br>(35 to 48)          | 42<br>(33 to 56)          | 39<br>(31 to 47)          |
| Central Asia                        | 12,617<br>(10,675 to 16,333)             | 4,668<br>(3,867 to 6,349)                | 7,949<br>(6,514 to 10,765)               | 16<br>(13 to 20)          | 11.2<br>(9.4 to 15.1)     | 21<br>(17 to 28)          |
| Central Europe                      | 25,130<br>(23,350 to 26,812)             | 9,085<br>(8,488 to 9,848)                | 16,045<br>(14,566 to 17,404)             | 16<br>(15 to 17)          | 10.8<br>(10.0 to 11.7)    | 23<br>(20 to 24)          |
| Central Latin America               | 55,150<br>(52,090 to 58,173)             | 23,379<br>(21,866 to 25,066)             | 31,771<br>(29,485 to 34,257)             | 24<br>(23 to 25)          | 20<br>(19 to 21)          | 28<br>(26 to 30)          |
| Central Sub-Saharan Africa          | 57,028<br>(32,829 to 85,084)             | 31,081<br>(12,671 to 50,869)             | 25,947<br>(13,827 to 43,391)             | 72<br>(40 to 113)         | 78<br>(34 to 131)         | 65<br>(34 to 106)         |
| East Asia                           | 151,602<br>(123,199 to 191,764)          | 56,337<br>(40,947 to 76,126)             | 95,265<br>(70,957 to 129,472)            | 10.8<br>(8.8 to 13.5)     | 8.3<br>(6.0 to 11.1)      | 13.4<br>(9.9 to 18.2)     |
| Eastern Europe                      | 79,745<br>(72,607 to 88,459)             | 25,169<br>(22,987 to 28,700)             | 54,576<br>(48,178 to 61,888)             | 31<br>(28 to 34)          | 17<br>(16 to 20)          | 46<br>(41 to 53)          |
| Eastern Sub-Saharan Africa          | 179,407<br>(111,753 to 236,339)          | 86,146<br>(43,294 to 118,584)            | 93,262<br>(55,045 to 134,080)            | 68<br>(38 to 98)          | 64<br>(32 to 96)          | 71<br>(39 to 114)         |
| High-income Asia Pacific            | 44,572<br>(42,462 to 46,916)             | 22,660<br>(21,363 to 24,106)             | 21,912<br>(20,485 to 23,366)             | 14<br>(14 to 15)          | 12<br>(12 to 13)          | 16<br>(15 to 17)          |
| High-income North America           | 145,474<br>(139,378 to 151,601)          | 66,944<br>(63,280 to 70,578)             | 78,530<br>(74,147 to 82,779)             | 31<br>(30 to 33)          | 27<br>(25 to 28)          | 36<br>(34 to 38)          |
| North Africa and Middle East        | 309,311<br>(267,590 to 412,108)          | 189,936<br>(153,274 to 267,814)          | 119,374<br>(93,988 to 161,678)           | 67<br>(59 to 93)          | 85<br>(70 to 125)         | 49<br>(40 to 70)          |
| Oceania                             | 11,814<br>(8,226 to 16,360)              | 7,371<br>(4,582 to 11,490)               | 4,443<br>(2,875 to 6,579)                | 146<br>(103 to 199)       | 181<br>(116 to 271)       | 107<br>(72 to 156)        |
| South Asia                          | 244,962<br>(126,882 to 304,495)          | 116,656<br>(48,199 to 145,880)           | 128,306<br>(65,594 to 162,941)           | 15.5<br>(8.8 to 18.9)     | 14.7<br>(6.7 to 18.0)     | 16.4<br>(9.1 to 20.4)     |
| Southeast Asia                      | 354,598<br>(297,066 to 430,244)          | 157,459<br>(118,576 to 204,623)          | 197,139<br>(153,715 to 249,816)          | 59<br>(49 to 70)          | 51<br>(38 to 66)          | 67<br>(51 to 84)          |
| Southern Latin America              | 31,751<br>(29,525 to 33,893)             | 18,375<br>(16,661 to 20,228)             | 13,376<br>(12,224 to 14,530)             | 46<br>(43 to 49)          | 45<br>(42 to 49)          | 43<br>(39 to 47)          |
| Southern Sub-Saharan Africa         | 25,945<br>(21,819 to 35,104)             | 11,940<br>(9,358 to 18,031)              | 14,005<br>(10,732 to 20,600)             | 39<br>(33 to 52)          | 34<br>(27 to 52)          | 43<br>(33 to 64)          |
| Tropical Latin America              | 76,188<br>(54,869 to 89,728)             | 32,834<br>(21,203 to 40,896)             | 43,353<br>(28,793 to 54,434)             | 37<br>(26 to 44)          | 31<br>(20 to 38)          | 45<br>(29 to 55)          |
| Western Europe                      | 169,852<br>(161,333 to 178,512)          | 86,759<br>(81,148 to 92,943)             | 83,093<br>(76,371 to 89,352)             | 24<br>(23 to 25)          | 20<br>(19 to 22)          | 27<br>(25 to 29)          |
| Western Sub-Saharan Africa          | 177,372<br>(135,982 to 229,570)          | 86,664<br>(56,600 to 129,984)            | 90,708<br>(65,051 to 124,011)            | 56<br>(44 to 74)          | 54<br>(38 to 81)          | 57<br>(41 to 81)          |
| <b>Hemorrhagic and other stroke</b> |                                          |                                          |                                          |                           |                           |                           |
| Global                              | 70,623,033<br>(68,220,445 to 73,564,496) | 29,333,303<br>(27,872,920 to 31,381,178) | 41,289,730<br>(39,438,614 to 43,279,057) | 1,030<br>(995 to 1,073)   | 822<br>(781 to 880)       | 1,256<br>(1,201 to 1,316) |
| Andean Latin America                | 214,782<br>(197,475 to 238,715)          | 103,252<br>(91,125 to 117,780)           | 111,529<br>(99,125 to 126,400)           | 445<br>(408 to 495)       | 417<br>(368 to 475)       | 473<br>(418 to 536)       |
| Australasia                         | 95,308<br>(90,279 to 101,208)            | 49,889<br>(46,038 to 53,951)             | 45,419<br>(42,117 to 49,348)             | 236<br>(224 to 249)       | 224<br>(209 to 241)       | 247<br>(230 to 268)       |
| Caribbean                           | 381,939<br>(347,208 to 418,563)          | 197,711<br>(168,620 to 231,752)          | 184,228<br>(166,386 to 204,621)          | 868<br>(790 to 951)       | 856<br>(729 to 1,005)     | 882<br>(800 to 977)       |
| Central Asia                        | 959,392<br>(918,469 to 1,029,525)        | 438,219<br>(403,243 to 495,596)          | 521,172<br>(491,394 to 553,774)          | 1,453<br>(1,389 to 1,557) | 1,201<br>(1,107 to 1,353) | 1,766<br>(1,666 to 1,875) |

|                                   |                                          |                                       |                                          |                           |                           |                           |
|-----------------------------------|------------------------------------------|---------------------------------------|------------------------------------------|---------------------------|---------------------------|---------------------------|
| Central Europe                    | 1,189,331<br>(1,149,019 to 1,240,077)    | 549,281<br>(524,745 to 572,179)       | 640,050<br>(616,256 to 681,064)          | 678<br>(655 to 706)       | 536<br>(513 to 559)       | 847<br>(816 to 900)       |
| Central Latin America             | 986,403<br>(951,738 to 1,019,951)        | 471,384<br>(451,161 to 492,019)       | 515,019<br>(490,422 to 540,519)          | 490<br>(474 to 507)       | 447<br>(428 to 466)       | 538<br>(513 to 564)       |
| Central Sub-Saharan Africa        | 1,052,294<br>(692,972 to 1,562,499)      | 575,238<br>(337,458 to 906,792)       | 477,056<br>(300,991 to 737,478)          | 2,036<br>(1,303 to 2,939) | 2,167<br>(1,231 to 3,381) | 1,878<br>(1,165 to 2,928) |
| East Asia                         | 22,492,144<br>(21,251,873 to 24,214,858) | 7,806,002<br>(7,210,706 to 8,792,281) | 14,686,142<br>(13,609,724 to 15,875,148) | 1,426<br>(1,348 to 1,540) | 988<br>(915 to 1,123)     | 1,877<br>(1,742 to 2,023) |
| Eastern Europe                    | 2,586,833<br>(2,451,007 to 2,734,949)    | 1,185,669<br>(1,096,487 to 1,281,855) | 1,401,164<br>(1,302,843 to 1,499,165)    | 844<br>(801 to 888)       | 618<br>(574 to 666)       | 1,151<br>(1,073 to 1,226) |
| Eastern Sub-Saharan Africa        | 2,424,699<br>(1,911,450 to 2,981,447)    | 1,197,385<br>(854,693 to 1,609,404)   | 1,227,314<br>(931,460 to 1,609,105)      | 1,443<br>(1,136 to 1,776) | 1,396<br>(969 to 1,881)   | 1,488<br>(1,122 to 1,946) |
| High-income Asia Pacific          | 1,164,266<br>(1,125,832 to 1,207,312)    | 470,383<br>(449,837 to 494,538)       | 693,883<br>(666,432 to 722,292)          | 366<br>(355 to 379)       | 257<br>(247 to 269)       | 485<br>(466 to 505)       |
| High-income North America         | 1,028,038<br>(991,249 to 1,070,851)      | 503,752<br>(478,738 to 530,568)       | 524,285<br>(498,217 to 555,044)          | 217<br>(210 to 226)       | 200<br>(190 to 210)       | 236<br>(225 to 250)       |
| North Africa and Middle East      | 4,035,257<br>(3,710,082 to 4,492,444)    | 1,929,068<br>(1,685,675 to 2,263,172) | 2,106,189<br>(1,944,553 to 2,341,315)    | 987<br>(909 to 1,099)     | 946<br>(829 to 1,102)     | 1,033<br>(955 to 1,168)   |
| Oceania                           | 192,578<br>(137,190 to 279,717)          | 106,304<br>(71,616 to 156,302)        | 86,274<br>(60,406 to 123,402)            | 2,615<br>(1,891 to 3,705) | 2,877<br>(1,970 to 4,220) | 2,310<br>(1,615 to 3,243) |
| South Asia                        | 15,173,456<br>(13,987,019 to 16,304,292) | 6,373,524<br>(5,478,720 to 7,146,032) | 8,799,931<br>(7,924,700 to 9,701,190)    | 1,199<br>(1,101 to 1,293) | 1,038<br>(881 to 1,172)   | 1,355<br>(1,217 to 1,499) |
| Southeast Asia                    | 9,352,614<br>(8,283,051 to 10,389,562)   | 3,900,517<br>(3,294,651 to 4,504,850) | 5,452,097<br>(4,690,434 to 6,317,434)    | 1,778<br>(1,585 to 1,961) | 1,431<br>(1,217 to 1,644) | 2,162<br>(1,864 to 2,472) |
| Southern Latin America            | 346,556<br>(331,744 to 359,967)          | 153,474<br>(144,731 to 162,465)       | 193,083<br>(182,455 to 204,214)          | 500<br>(479 to 519)       | 400<br>(377 to 423)       | 621<br>(587 to 657)       |
| Southern Sub-Saharan Africa       | 564,469<br>(497,815 to 647,673)          | 281,156<br>(238,450 to 341,019)       | 283,313<br>(241,605 to 333,248)          | 1,133<br>(1,006 to 1,290) | 1,020<br>(871 to 1,229)   | 1,250<br>(1,085 to 1,471) |
| Tropical Latin America            | 2,007,630<br>(1,913,492 to 2,162,505)    | 924,520<br>(870,402 to 991,401)       | 1,083,109<br>(1,017,696 to 1,208,866)    | 1,033<br>(985 to 1,111)   | 873<br>(822 to 935)       | 1,231<br>(1,157 to 1,371) |
| Western Europe                    | 1,967,477<br>(1,899,948 to 2,045,706)    | 957,561<br>(914,165 to 1,002,173)     | 1,009,916<br>(967,534 to 1,059,399)      | 260<br>(252 to 269)       | 219<br>(210 to 229)       | 306<br>(293 to 320)       |
| Western Sub-Saharan Africa        | 2,407,569<br>(2,045,106 to 2,912,238)    | 1,159,014<br>(910,331 to 1,559,330)   | 1,248,556<br>(1,012,004 to 1,570,157)    | 1,223<br>(1,032 to 1,497) | 1,210<br>(942 to 1,631)   | 1,231<br>(1,000 to 1,572) |
| <b>Hypertensive heart disease</b> |                                          |                                       |                                          |                           |                           |                           |
| Global                            | 16,814,565<br>(15,609,949 to 17,888,838) | 8,063,747<br>(6,798,970 to 8,865,627) | 8,750,818<br>(8,234,861 to 9,288,021)    | 252<br>(233 to 268)       | 228<br>(192 to 250)       | 277<br>(261 to 294)       |
| Andean Latin America              | 52,361<br>(45,814 to 57,702)             | 27,080<br>(20,462 to 31,437)          | 25,281<br>(21,946 to 28,978)             | 120<br>(104 to 132)       | 116<br>(89 to 135)        | 122<br>(106 to 141)       |
| Australasia                       | 10,918<br>(9,921 to 12,058)              | 6,115<br>(5,334 to 7,048)             | 4,803<br>(4,265 to 5,523)                | 26<br>(24 to 29)          | 25<br>(22 to 28)          | 26<br>(23 to 30)          |
| Caribbean                         | 136,877<br>(120,545 to 167,282)          | 72,415<br>(58,549 to 99,191)          | 64,462<br>(55,724 to 78,587)             | 314<br>(276 to 384)       | 311<br>(250 to 425)       | 316<br>(274 to 383)       |
| Central Asia                      | 358,990<br>(289,688 to 399,475)          | 165,871<br>(94,945 to 195,839)        | 193,119<br>(167,365 to 219,523)          | 564<br>(448 to 628)       | 463<br>(261 to 547)       | 696<br>(601 to 792)       |
| Central Europe                    | 395,808<br>(363,338 to 416,565)          | 202,033<br>(190,096 to 214,129)       | 193,775<br>(157,544 to 209,638)          | 212<br>(194 to 223)       | 177<br>(167 to 187)       | 254<br>(206 to 273)       |
| Central Latin America             | 299,235<br>(284,985 to 314,748)          | 162,055<br>(150,932 to 172,682)       | 137,180<br>(128,123 to 147,100)          | 167<br>(159 to 176)       | 166<br>(155 to 177)       | 166<br>(156 to 178)       |
| Central Sub-Saharan Africa        | 357,525<br>(221,756 to 553,121)          | 232,478<br>(120,470 to 395,293)       | 125,047<br>(71,022 to 216,870)           | 830<br>(513 to 1,271)     | 1,039<br>(554 to 1,766)   | 573<br>(334 to 983)       |
| East Asia                         | 3,882,813<br>(3,322,545 to 4,201,381)    | 1,555,035<br>(1,011,618 to 1,747,733) | 2,327,778<br>(2,106,805 to 2,552,881)    | 266<br>(224 to 287)       | 208<br>(135 to 234)       | 328<br>(297 to 359)       |
| Eastern Europe                    | 524,454<br>(492,696 to 564,914)          | 267,828<br>(246,438 to 292,303)       | 256,626<br>(231,922 to 286,362)          | 166<br>(156 to 179)       | 130<br>(120 to 141)       | 214<br>(194 to 238)       |
| Eastern Sub-Saharan Africa        | 997,925<br>(694,186 to 1,582,141)        | 590,341<br>(341,986 to 1,040,848)     | 407,584<br>(290,895 to 706,075)          | 673<br>(457 to 1,117)     | 779<br>(444 to 1,415)     | 543<br>(390 to 998)       |
| High-income Asia Pacific          | 132,924<br>(125,168 to 142,713)          | 77,849<br>(72,649 to 83,979)          | 55,076<br>(51,077 to 61,146)             | 34<br>(32 to 36)          | 31<br>(29 to 34)          | 36<br>(33 to 40)          |
| High-income North America         | 660,907<br>(581,842 to 690,950)          | 272,863<br>(254,982 to 289,316)       | 388,044<br>(318,548 to 413,817)          | 136<br>(119 to 143)       | 102<br>(95 to 108)        | 172<br>(141 to 183)       |



|                               |                                             |                                          |                                           |                           |                           |                           |
|-------------------------------|---------------------------------------------|------------------------------------------|-------------------------------------------|---------------------------|---------------------------|---------------------------|
| North Africa and Middle East  | 1,024,654<br>(922,916 to 1,160,280)         | 588,228<br>(503,271 to 734,622)          | 436,426<br>(387,434 to 489,517)           | 300<br>(270 to 336)       | 332<br>(285 to 412)       | 266<br>(236 to 296)       |
| Oceania                       | 38,212<br>(26,210 to 57,435)                | 19,471<br>(11,923 to 31,315)             | 18,741<br>(12,834 to 28,270)              | 615<br>(434 to 926)       | 606<br>(385 to 978)       | 623<br>(440 to 966)       |
| South Asia                    | 4,787,266<br>(4,295,242 to 5,415,984)       | 2,061,601<br>(1,765,209 to 2,539,856)    | 2,725,665<br>(2,322,364 to 3,106,398)     | 398<br>(356 to 448)       | 351<br>(299 to 433)       | 443<br>(376 to 507)       |
| Southeast Asia                | 1,356,173<br>(1,197,263 to 1,540,060)       | 693,301<br>(573,973 to 842,199)          | 662,872<br>(567,775 to 772,172)           | 269<br>(238 to 304)       | 261<br>(217 to 315)       | 274<br>(237 to 317)       |
| Southern Latin America        | 112,978<br>(106,006 to 122,155)             | 54,619<br>(49,559 to 59,949)             | 58,359<br>(53,666 to 64,010)              | 155<br>(146 to 167)       | 122<br>(112 to 134)       | 196<br>(180 to 216)       |
| Southern Sub-Saharan Africa   | 266,048<br>(233,140 to 308,018)             | 161,944<br>(134,859 to 195,055)          | 104,104<br>(90,667 to 119,721)            | 591<br>(517 to 678)       | 623<br>(520 to 747)       | 531<br>(469 to 603)       |
| Tropical Latin America        | 406,673<br>(366,598 to 431,793)             | 205,353<br>(171,508 to 226,692)          | 201,320<br>(185,696 to 215,729)           | 220<br>(196 to 233)       | 200<br>(165 to 221)       | 245<br>(226 to 263)       |
| Western Europe                | 605,258<br>(571,025 to 641,977)             | 359,930<br>(331,887 to 389,894)          | 245,329<br>(228,280 to 264,742)           | 69<br>(65 to 73)          | 66<br>(61 to 70)          | 70<br>(65 to 75)          |
| Western Sub-Saharan Africa    | 406,566<br>(321,147 to 552,740)             | 287,337<br>(197,966 to 420,884)          | 119,230<br>(90,767 to 161,623)            | 250<br>(196 to 336)       | 352<br>(250 to 503)       | 137<br>(105 to 186)       |
| <b>Ischemic heart disease</b> |                                             |                                          |                                           |                           |                           |                           |
| Global                        | 156,745,658<br>(152,797,770 to 160,957,100) | 57,580,629<br>(55,973,775 to 59,632,960) | 99,165,029<br>(95,982,020 to 102,734,676) | 2,343<br>(2,285 to 2,403) | 1,634<br>(1,589 to 1,692) | 3,106<br>(3,011 to 3,209) |
| Andean Latin America          | 534,930<br>(495,318 to 576,593)             | 222,256<br>(198,037 to 250,438)          | 312,674<br>(279,934 to 347,926)           | 1,222<br>(1,132 to 1,319) | 966<br>(859 to 1,090)     | 1,498<br>(1,345 to 1,653) |
| Australasia                   | 420,533<br>(406,499 to 433,350)             | 151,984<br>(144,416 to 159,491)          | 268,549<br>(258,273 to 278,728)           | 1,033<br>(999 to 1,063)   | 645<br>(613 to 676)       | 1,450<br>(1,395 to 1,504) |
| Caribbean                     | 1,026,879<br>(969,210 to 1,085,389)         | 437,889<br>(398,421 to 482,253)          | 588,990<br>(550,368 to 631,009)           | 2,355<br>(2,223 to 2,490) | 1,876<br>(1,705 to 2,068) | 2,882<br>(2,696 to 3,077) |
| Central Asia                  | 3,296,465<br>(3,172,848 to 3,424,808)       | 1,250,126<br>(1,185,851 to 1,310,872)    | 2,046,339<br>(1,947,373 to 2,147,913)     | 5,251<br>(5,071 to 5,443) | 3,631<br>(3,449 to 3,800) | 7,304<br>(6,974 to 7,624) |
| Central Europe                | 4,704,390<br>(4,605,636 to 4,795,481)       | 1,881,457<br>(1,836,768 to 1,924,439)    | 2,822,934<br>(2,744,936 to 2,894,107)     | 2,556<br>(2,498 to 2,607) | 1,626<br>(1,585 to 1,664) | 3,695<br>(3,595 to 3,789) |
| Central Latin America         | 3,245,807<br>(3,149,886 to 3,330,968)       | 1,267,416<br>(1,218,980 to 1,311,814)    | 1,978,391<br>(1,904,045 to 2,055,287)     | 1,733<br>(1,683 to 1,777) | 1,286<br>(1,237 to 1,330) | 2,234<br>(2,155 to 2,317) |
| Central Sub-Saharan Africa    | 1,026,771<br>(655,805 to 1,542,636)         | 462,960<br>(271,126 to 716,457)          | 563,811<br>(342,986 to 897,808)           | 2,403<br>(1,563 to 3,431) | 2,193<br>(1,323 to 3,282) | 2,595<br>(1,617 to 3,993) |
| East Asia                     | 25,207,835<br>(23,858,923 to 26,611,608)    | 8,828,763<br>(8,244,901 to 9,441,690)    | 16,379,073<br>(15,219,087 to 17,665,323)  | 1,662<br>(1,580 to 1,750) | 1,167<br>(1,093 to 1,246) | 2,172<br>(2,028 to 2,331) |
| Eastern Europe                | 16,663,181<br>(16,261,727 to 17,054,359)    | 7,158,632<br>(6,933,221 to 7,384,622)    | 9,504,549<br>(9,203,439 to 9,813,611)     | 5,223<br>(5,096 to 5,348) | 3,325<br>(3,221 to 3,436) | 8,002<br>(7,762 to 8,241) |
| Eastern Sub-Saharan Africa    | 3,084,083<br>(2,431,134 to 3,837,577)       | 1,227,141<br>(870,859 to 1,693,777)      | 1,856,942<br>(1,391,307 to 2,474,449)     | 2,070<br>(1,643 to 2,548) | 1,660<br>(1,191 to 2,247) | 2,525<br>(1,931 to 3,315) |
| High-income Asia Pacific      | 2,166,000<br>(2,112,127 to 2,220,663)       | 826,918<br>(792,151 to 859,266)          | 1,339,082<br>(1,294,239 to 1,383,200)     | 612<br>(597 to 628)       | 358<br>(345 to 372)       | 890<br>(859 to 919)       |
| High-income North America     | 7,918,311<br>(7,718,471 to 8,076,801)       | 2,953,356<br>(2,845,620 to 3,050,230)    | 4,964,955<br>(4,831,780 to 5,076,783)     | 1,562<br>(1,524 to 1,593) | 1,032<br>(996 to 1,063)   | 2,156<br>(2,099 to 2,204) |
| North Africa and Middle East  | 12,698,714<br>(11,872,505 to 13,616,871)    | 4,823,324<br>(4,420,181 to 5,316,216)    | 7,875,390<br>(7,289,692 to 8,561,362)     | 3,533<br>(3,323 to 3,760) | 2,719<br>(2,508 to 2,964) | 4,367<br>(4,070 to 4,700) |
| Oceania                       | 350,880<br>(256,876 to 487,590)             | 127,099<br>(90,486 to 181,046)           | 223,782<br>(163,725 to 315,236)           | 5,183<br>(3,928 to 6,966) | 3,922<br>(2,882 to 5,369) | 6,446<br>(4,906 to 8,688) |
| South Asia                    | 45,499,549<br>(43,342,793 to 48,060,954)    | 15,084,312<br>(14,049,374 to 16,366,510) | 30,415,237<br>(28,610,810 to 32,603,576)  | 3,873<br>(3,698 to 4,071) | 2,713<br>(2,532 to 2,937) | 5,020<br>(4,734 to 5,345) |
| Southeast Asia                | 11,854,851<br>(10,632,446 to 13,036,603)    | 4,217,467<br>(3,707,708 to 4,751,282)    | 7,637,384<br>(6,666,846 to 8,655,077)     | 2,317<br>(2,093 to 2,520) | 1,605<br>(1,425 to 1,792) | 3,123<br>(2,743 to 3,473) |
| Southern Latin America        | 1,152,236<br>(1,115,850 to 1,186,836)       | 440,901<br>(421,076 to 461,994)          | 711,335<br>(682,644 to 736,991)           | 1,614<br>(1,563 to 1,663) | 1,018<br>(974 to 1,067)   | 2,337<br>(2,243 to 2,421) |
| Southern Sub-Saharan Africa   | 1,024,791<br>(916,632 to 1,156,002)         | 474,488<br>(406,290 to 557,223)          | 550,304<br>(482,639 to 630,405)           | 2,302<br>(2,074 to 2,583) | 1,876<br>(1,613 to 2,195) | 2,799<br>(2,483 to 3,168) |
| Tropical Latin America        | 3,718,598<br>(3,545,957 to 3,904,185)       | 1,422,468<br>(1,341,224 to 1,530,940)    | 2,296,129<br>(2,142,073 to 2,445,214)     | 1,946<br>(1,857 to 2,043) | 1,378<br>(1,299 to 1,480) | 2,625<br>(2,458 to 2,789) |
| Western Europe                | 8,263,885<br>(8,068,828 to 8,435,307)       | 3,067,414<br>(2,966,414 to 3,169,367)    | 5,196,472<br>(5,072,530 to 5,324,522)     | 1,058<br>(1,036 to 1,079) | 619<br>(600 to 638)       | 1,553<br>(1,517 to 1,590) |

|                                                      |                                          |                                          |                                          |                           |                           |                           |
|------------------------------------------------------|------------------------------------------|------------------------------------------|------------------------------------------|---------------------------|---------------------------|---------------------------|
| Western Sub-Saharan Africa                           | 2,886,968<br>(2,439,007 to 3,475,099)    | 1,254,257<br>(981,436 to 1,698,642)      | 1,632,710<br>(1,309,843 to 2,093,666)    | 1,987<br>(1,706 to 2,356) | 1,783<br>(1,426 to 2,358) | 2,193<br>(1,794 to 2,745) |
| <b>Ischemic stroke</b>                               |                                          |                                          |                                          |                           |                           |                           |
| Global                                               | 41,548,546<br>(39,843,949 to 43,182,109) | 18,890,267<br>(17,796,906 to 20,065,480) | 22,658,279<br>(21,549,208 to 23,734,429) | 651<br>(625 to 676)       | 543<br>(512 to 577)       | 773<br>(738 to 807)       |
| Andean Latin America                                 | 534,930<br>(495,318 to 576,593)          | 222,256<br>(198,037 to 250,438)          | 312,674<br>(279,934 to 347,926)          | 1,222<br>(1,132 to 1,319) | 966<br>(859 to 1,090)     | 1,498<br>(1,345 to 1,653) |
| Australasia                                          | 420,533<br>(406,499 to 433,350)          | 151,984<br>(144,416 to 159,491)          | 268,549<br>(258,273 to 278,728)          | 1,033<br>(999 to 1,063)   | 645<br>(613 to 676)       | 1,450<br>(1,395 to 1,504) |
| Caribbean                                            | 1,026,879<br>(969,210 to 1,085,389)      | 437,889<br>(398,421 to 482,253)          | 588,990<br>(550,368 to 631,009)          | 2,355<br>(2,223 to 2,490) | 1,876<br>(1,705 to 2,068) | 2,882<br>(2,696 to 3,077) |
| Central Asia                                         | 3,296,465<br>(3,172,848 to 3,424,808)    | 1,250,126<br>(1,185,851 to 1,310,872)    | 2,046,339<br>(1,947,373 to 2,147,913)    | 5,251<br>(5,071 to 5,443) | 3,631<br>(3,449 to 3,800) | 7,304<br>(6,974 to 7,624) |
| Central Europe                                       | 4,704,390<br>(4,605,636 to 4,795,481)    | 1,881,457<br>(1,836,768 to 1,924,439)    | 2,822,934<br>(2,744,936 to 2,894,107)    | 2,556<br>(2,498 to 2,607) | 1,626<br>(1,585 to 1,664) | 3,695<br>(3,595 to 3,789) |
| Central Latin America                                | 3,245,807<br>(3,149,886 to 3,330,968)    | 1,267,416<br>(1,218,980 to 1,311,814)    | 1,978,391<br>(1,904,045 to 2,055,287)    | 1,733<br>(1,683 to 1,777) | 1,286<br>(1,237 to 1,330) | 2,234<br>(2,155 to 2,317) |
| Central Sub-Saharan Africa                           | 1,026,771<br>(655,805 to 1,542,636)      | 462,960<br>(271,126 to 716,457)          | 563,811<br>(342,986 to 897,808)          | 2,403<br>(1,563 to 3,431) | 2,193<br>(1,323 to 3,282) | 2,595<br>(1,617 to 3,993) |
| East Asia                                            | 25,207,835<br>(23,858,923 to 26,611,608) | 8,828,763<br>(8,244,901 to 9,441,690)    | 16,379,073<br>(15,219,087 to 17,665,323) | 1,662<br>(1,580 to 1,750) | 1,167<br>(1,093 to 1,246) | 2,172<br>(2,028 to 2,331) |
| Eastern Europe                                       | 16,663,181<br>(16,261,727 to 17,054,359) | 7,158,632<br>(6,933,221 to 7,384,622)    | 9,504,549<br>(9,203,439 to 9,813,611)    | 5,223<br>(5,096 to 5,348) | 3,325<br>(3,221 to 3,436) | 8,002<br>(7,762 to 8,241) |
| Eastern Sub-Saharan Africa                           | 3,084,083<br>(2,431,134 to 3,837,577)    | 1,227,141<br>(870,859 to 1,693,777)      | 1,856,942<br>(1,391,307 to 2,474,449)    | 2,070<br>(1,643 to 2,548) | 1,660<br>(1,191 to 2,247) | 2,525<br>(1,931 to 3,315) |
| High-income Asia Pacific                             | 2,166,000<br>(2,112,127 to 2,220,663)    | 826,918<br>(792,151 to 859,266)          | 1,339,082<br>(1,294,239 to 1,383,200)    | 612<br>(597 to 628)       | 358<br>(345 to 372)       | 890<br>(859 to 919)       |
| High-income North America                            | 7,918,311<br>(7,718,471 to 8,076,801)    | 2,953,356<br>(2,845,620 to 3,050,230)    | 4,964,955<br>(4,831,780 to 5,076,783)    | 1,562<br>(1,524 to 1,593) | 1,032<br>(996 to 1,063)   | 2,156<br>(2,099 to 2,204) |
| North Africa and Middle East                         | 12,698,714<br>(11,872,505 to 13,616,871) | 4,823,324<br>(4,420,181 to 5,316,216)    | 7,875,390<br>(7,289,692 to 8,561,362)    | 3,533<br>(3,323 to 3,760) | 2,719<br>(2,508 to 2,964) | 4,367<br>(4,070 to 4,700) |
| Oceania                                              | 350,880<br>(256,876 to 487,590)          | 127,099<br>(90,486 to 181,046)           | 223,782<br>(163,725 to 315,236)          | 5,183<br>(3,928 to 6,966) | 3,922<br>(2,882 to 5,369) | 6,446<br>(4,906 to 8,688) |
| South Asia                                           | 45,499,549<br>(43,342,793 to 48,060,954) | 15,084,312<br>(14,049,374 to 16,366,510) | 30,415,237<br>(28,610,810 to 32,603,576) | 3,873<br>(3,698 to 4,071) | 2,713<br>(2,532 to 2,937) | 5,020<br>(4,734 to 5,345) |
| Southeast Asia                                       | 11,854,851<br>(10,632,446 to 13,036,603) | 4,217,467<br>(3,707,708 to 4,751,282)    | 7,637,384<br>(6,666,846 to 8,655,077)    | 2,317<br>(2,093 to 2,520) | 1,605<br>(1,425 to 1,792) | 3,123<br>(2,743 to 3,473) |
| Southern Latin America                               | 1,152,236<br>(1,115,850 to 1,186,836)    | 440,901<br>(421,076 to 461,994)          | 711,335<br>(682,644 to 736,991)          | 1,614<br>(1,563 to 1,663) | 1,018<br>(974 to 1,067)   | 2,337<br>(2,243 to 2,421) |
| Southern Sub-Saharan Africa                          | 1,024,791<br>(916,632 to 1,156,002)      | 474,488<br>(406,290 to 557,223)          | 550,304<br>(482,639 to 630,405)          | 2,302<br>(2,074 to 2,583) | 1,876<br>(1,613 to 2,195) | 2,799<br>(2,483 to 3,168) |
| Tropical Latin America                               | 3,718,598<br>(3,545,957 to 3,904,185)    | 1,422,468<br>(1,341,224 to 1,530,940)    | 2,296,129<br>(2,142,073 to 2,445,214)    | 1,946<br>(1,857 to 2,043) | 1,378<br>(1,299 to 1,480) | 2,625<br>(2,458 to 2,789) |
| Western Europe                                       | 8,263,885<br>(8,068,828 to 8,435,307)    | 3,067,414<br>(2,966,414 to 3,169,367)    | 5,196,472<br>(5,072,530 to 5,324,522)    | 1,058<br>(1,036 to 1,079) | 619<br>(600 to 638)       | 1,553<br>(1,517 to 1,590) |
| Western Sub-Saharan Africa                           | 2,886,968<br>(2,439,007 to 3,475,099)    | 1,254,257<br>(981,436 to 1,698,642)      | 1,632,710<br>(1,309,843 to 2,093,666)    | 1,987<br>(1,706 to 2,356) | 1,783<br>(1,426 to 2,358) | 2,193<br>(1,794 to 2,745) |
| <b>Other cardiovascular and circulatory diseases</b> |                                          |                                          |                                          |                           |                           |                           |
| Global                                               | 10,820,011<br>(10,339,766 to 11,347,688) | 5,025,055<br>(4,743,043 to 5,345,762)    | 5,794,956<br>(5,478,813 to 6,142,325)    | 158<br>(152 to 166)       | 141<br>(133 to 150)       | 177<br>(168 to 188)       |
| Andean Latin America                                 | 70,695<br>(63,472 to 77,530)             | 33,083<br>(28,656 to 37,641)             | 37,612<br>(32,367 to 42,547)             | 144<br>(131 to 158)       | 131<br>(113 to 150)       | 157<br>(137 to 178)       |
| Australasia                                          | 32,189<br>(30,057 to 34,409)             | 15,384<br>(13,879 to 16,964)             | 16,805<br>(15,353 to 18,389)             | 81<br>(76 to 86)          | 71<br>(65 to 78)          | 92<br>(84 to 100)         |
| Caribbean                                            | 93,038<br>(84,676 to 103,541)            | 47,888<br>(41,333 to 56,080)             | 45,150<br>(40,601 to 50,558)             | 211<br>(192 to 235)       | 208<br>(179 to 244)       | 215<br>(195 to 241)       |
| Central Asia                                         | 90,875<br>(83,169 to 99,891)             | 30,973<br>(27,225 to 34,593)             | 59,903<br>(52,863 to 67,580)             | 122<br>(112 to 134)       | 78<br>(69 to 87)          | 176<br>(156 to 197)       |
| Central Europe                                       | 329,409<br>(318,480 to 340,682)          | 133,277<br>(127,613 to 138,841)          | 196,133<br>(187,735 to 204,836)          | 189<br>(182 to 195)       | 131<br>(126 to 136)       | 259<br>(248 to 270)       |

|                                  |                                       |                                 |                                 |                      |                       |                       |
|----------------------------------|---------------------------------------|---------------------------------|---------------------------------|----------------------|-----------------------|-----------------------|
| Central Latin America            | 236,472<br>(228,807 to 244,357)       | 114,066<br>(109,031 to 119,662) | 122,406<br>(117,299 to 128,084) | 115<br>(111 to 119)  | 106<br>(101 to 111)   | 124<br>(119 to 130)   |
| Central Sub-Saharan Africa       | 381,688<br>(272,739 to 541,473)       | 211,509<br>(134,830 to 320,916) | 170,180<br>(114,381 to 252,921) | 606<br>(403 to 884)  | 654<br>(392 to 1,037) | 549<br>(347 to 853)   |
| East Asia                        | 1,371,477<br>(1,280,115 to 1,473,235) | 530,634<br>(479,950 to 582,205) | 840,843<br>(770,600 to 924,024) | 99<br>(92 to 106)    | 76<br>(69 to 84)      | 122<br>(112 to 133)   |
| Eastern Europe                   | 357,549<br>(336,157 to 381,511)       | 157,233<br>(145,303 to 171,238) | 200,316<br>(184,535 to 218,457) | 123<br>(116 to 131)  | 90<br>(84 to 98)      | 166<br>(153 to 181)   |
| Eastern Sub-Saharan Africa       | 1,436,902<br>(1,182,575 to 1,735,426) | 660,711<br>(496,403 to 861,319) | 776,191<br>(614,449 to 966,437) | 809<br>(656 to 978)  | 738<br>(544 to 979)   | 885<br>(695 to 1,122) |
| High-income Asia Pacific         | 183,553<br>(176,817 to 191,142)       | 94,868<br>(90,316 to 100,289)   | 88,684<br>(84,590 to 93,087)    | 53<br>(51 to 55)     | 47<br>(45 to 49)      | 60<br>(57 to 63)      |
| High-income North America        | 615,692<br>(592,239 to 643,959)       | 304,221<br>(288,736 to 321,339) | 311,471<br>(295,626 to 330,497) | 130<br>(125 to 136)  | 119<br>(113 to 126)   | 142<br>(135 to 151)   |
| North Africa and Middle East     | 1,642,969<br>(1,536,648 to 1,773,343) | 792,241<br>(720,176 to 877,772) | 850,728<br>(781,589 to 932,621) | 384<br>(360 to 409)  | 366<br>(333 to 404)   | 402<br>(370 to 439)   |
| Oceania                          | 39,142<br>(29,530 to 53,671)          | 21,080<br>(14,807 to 29,742)    | 18,061<br>(13,700 to 24,242)    | 493<br>(377 to 657)  | 519<br>(371 to 719)   | 468<br>(366 to 612)   |
| South Asia                       | 434,826<br>(400,352 to 476,093)       | 186,423<br>(167,051 to 212,212) | 248,403<br>(223,661 to 280,457) | 39<br>(36 to 42)     | 33<br>(30 to 38)      | 44<br>(40 to 50)      |
| Southeast Asia                   | 889,987<br>(794,766 to 991,111)       | 395,211<br>(342,020 to 457,020) | 494,776<br>(428,900 to 567,592) | 166<br>(149 to 185)  | 142<br>(123 to 164)   | 194<br>(169 to 222)   |
| Southern Latin America           | 150,330<br>(142,329 to 158,393)       | 76,745<br>(71,273 to 82,854)    | 73,584<br>(68,486 to 78,997)    | 214<br>(203 to 225)  | 189<br>(177 to 203)   | 242<br>(225 to 260)   |
| Southern Sub-Saharan Africa      | 126,405<br>(110,332 to 145,063)       | 68,476<br>(57,546 to 81,874)    | 57,928<br>(48,593 to 69,511)    | 222<br>(196 to 252)  | 219<br>(186 to 257)   | 226<br>(194 to 264)   |
| Tropical Latin America           | 397,618<br>(376,008 to 421,535)       | 193,508<br>(180,120 to 209,694) | 204,110<br>(188,762 to 220,645) | 206<br>(195 to 218)  | 186<br>(173 to 201)   | 229<br>(213 to 247)   |
| Western Europe                   | 1,104,516<br>(1,062,413 to 1,147,835) | 554,600<br>(524,900 to 584,722) | 549,916<br>(523,973 to 580,438) | 145<br>(140 to 151)  | 125<br>(119 to 131)   | 167<br>(159 to 176)   |
| Western Sub-Saharan Africa       | 834,680<br>(712,722 to 1,008,888)     | 402,925<br>(328,287 to 525,558) | 431,755<br>(350,225 to 556,109) | 353<br>(297 to 442)  | 355<br>(276 to 481)   | 347<br>(275 to 459)   |
| <b>Peripheral artery disease</b> |                                       |                                 |                                 |                      |                       |                       |
| Global                           | 626,004<br>(597,995 to 658,714)       | 261,357<br>(242,226 to 282,354) | 364,647<br>(346,037 to 385,291) | 9.9<br>(9.5 to 10.4) | 7.5<br>(6.9 to 8.1)   | 13<br>(12 to 13)      |
| Andean Latin America             | 582<br>(498 to 682)                   | 266<br>(212 to 340)             | 316<br>(264 to 380)             | 1.4<br>(1.2 to 1.7)  | 1.2<br>(0.9 to 1.5)   | 1.7<br>(1.4 to 2.1)   |
| Australasia                      | 8,731<br>(7,375 to 10,528)            | 3,993<br>(3,019 to 5,201)       | 4,739<br>(3,897 to 5,881)       | 20<br>(17 to 23)     | 16<br>(12 to 20)      | 25<br>(20 to 30)      |
| Caribbean                        | 10,548<br>(9,489 to 11,693)           | 4,891<br>(4,125 to 5,679)       | 5,657<br>(5,008 to 6,382)       | 24<br>(22 to 27)     | 20<br>(17 to 24)      | 29<br>(26 to 33)      |
| Central Asia                     | 2,352<br>(2,045 to 2,669)             | 734<br>(587 to 911)             | 1,618<br>(1,384 to 1,851)       | 4.0<br>(3.5 to 4.5)  | 2.2<br>(1.7 to 2.7)   | 6.5<br>(5.6 to 7.3)   |
| Central Europe                   | 41,745<br>(38,127 to 45,288)          | 14,163<br>(12,314 to 16,512)    | 27,581<br>(24,787 to 30,767)    | 22<br>(20 to 24)     | 12<br>(11 to 14)      | 35<br>(32 to 39)      |
| Central Latin America            | 8,986<br>(8,261 to 9,790)             | 4,706<br>(4,183 to 5,258)       | 4,280<br>(3,886 to 4,728)       | 5.2<br>(4.8 to 5.6)  | 4.9<br>(4.3 to 5.4)   | 5.5<br>(5.0 to 6.1)   |
| Central Sub-Saharan Africa       | 1,493<br>(938 to 2,366)               | 852<br>(423 to 1,679)           | 641<br>(392 to 1,057)           | 4.3<br>(2.7 to 6.8)  | 4.7<br>(2.4 to 9.0)   | 3.7<br>(2.3 to 5.8)   |
| East Asia                        | 24,257<br>(22,309 to 26,544)          | 8,230<br>(7,065 to 9,273)       | 16,027<br>(14,373 to 18,026)    | 1.7<br>(1.6 to 1.9)  | 1.1<br>(1.0 to 1.3)   | 2.4<br>(2.1 to 2.7)   |
| Eastern Europe                   | 108,354<br>(97,268 to 120,217)        | 42,023<br>(34,753 to 49,456)    | 66,331<br>(58,807 to 74,917)    | 33<br>(30 to 37)     | 19<br>(16 to 22)      | 56<br>(50 to 63)      |
| Eastern Sub-Saharan Africa       | 4,437<br>(3,227 to 6,382)             | 2,159<br>(1,173 to 3,753)       | 2,277<br>(1,657 to 3,123)       | 3.7<br>(2.6 to 5.5)  | 3.5<br>(1.9 to 6.2)   | 3.9<br>(2.8 to 5.4)   |
| High-income Asia Pacific         | 11,762<br>(10,818 to 12,788)          | 4,890<br>(4,228 to 5,719)       | 6,872<br>(6,323 to 7,457)       | 2.8<br>(2.6 to 3.1)  | 1.8<br>(1.6 to 2.1)   | 4.1<br>(3.8 to 4.4)   |
| High-income North America        | 110,369<br>(102,125 to 119,198)       | 52,803<br>(45,799 to 59,660)    | 57,567<br>(53,087 to 62,640)    | 21<br>(20 to 23)     | 18<br>(16 to 20)      | 25<br>(23 to 27)      |
| North Africa and Middle East     | 11,237<br>(10,155 to 12,551)          | 3,538<br>(3,034 to 4,074)       | 7,698<br>(6,775 to 8,766)       | 3.6<br>(3.3 to 4.1)  | 2.2<br>(1.9 to 2.6)   | 5.2<br>(4.6 to 6.0)   |

|                             |                                 |                              |                               |                     |                     |                      |
|-----------------------------|---------------------------------|------------------------------|-------------------------------|---------------------|---------------------|----------------------|
| Oceania                     | 263<br>(157 to 375)             | 69<br>(41 to 133)            | 194<br>(103 to 283)           | 5.0<br>(3.1 to 6.9) | 2.8<br>(1.6 to 5.2) | 7.7<br>(4.3 to 10.7) |
| South Asia                  | 31,843<br>(26,717 to 38,861)    | 10,093<br>(7,208 to 17,011)  | 21,750<br>(15,361 to 28,499)  | 3.2<br>(2.7 to 3.9) | 2.1<br>(1.5 to 3.6) | 4.4<br>(3.1 to 5.7)  |
| Southeast Asia              | 7,626<br>(6,544 to 9,234)       | 2,719<br>(2,128 to 3,451)    | 4,907<br>(4,059 to 6,082)     | 1.7<br>(1.5 to 2.1) | 1.2<br>(0.9 to 1.5) | 2.4<br>(2.0 to 3.0)  |
| Southern Latin America      | 6,099<br>(5,458 to 6,789)       | 2,601<br>(2,141 to 3,107)    | 3,497<br>(3,051 to 4,003)     | 8.3<br>(7.4 to 9.1) | 5.6<br>(4.7 to 6.7) | 12<br>(11 to 14)     |
| Southern Sub-Saharan Africa | 18,222<br>(16,052 to 20,916)    | 6,482<br>(5,306 to 7,946)    | 11,741<br>(9,979 to 13,755)   | 42<br>(37 to 48)    | 26<br>(21 to 32)    | 63<br>(54 to 74)     |
| Tropical Latin America      | 37,829<br>(34,608 to 42,055)    | 16,480<br>(14,398 to 19,030) | 21,350<br>(19,082 to 24,113)  | 21<br>(19 to 24)    | 16<br>(14 to 19)    | 28<br>(25 to 31)     |
| Western Europe              | 177,394<br>(164,238 to 191,151) | 78,337<br>(69,479 to 88,718) | 99,057<br>(90,671 to 107,661) | 21<br>(20 to 23)    | 15<br>(13 to 17)    | 28<br>(26 to 30)     |
| Western Sub-Saharan Africa  | 1,873<br>(1,376 to 2,752)       | 1,328<br>(891 to 2,217)      | 545<br>(375 to 843)           | 1.6<br>(1.2 to 2.2) | 2.1<br>(1.5 to 3.4) | 1.0<br>(0.7 to 1.6)  |

**eTable 2: 2015 Global and Regional of YLDs for all CVD level 3 and 4 subcauses including 95% uncertainty, total number and age-standardized rate, by sex and total for 2015**

|                                        | Years Lived with Disability (YLDs)       |                                         |                                         |                                |                        |                     |
|----------------------------------------|------------------------------------------|-----------------------------------------|-----------------------------------------|--------------------------------|------------------------|---------------------|
|                                        | All Ages                                 |                                         |                                         | Age-standardized (per 100,000) |                        |                     |
|                                        | Total                                    | Female                                  | Male                                    | Total                          | Female                 | Male                |
| <b>Cardiovascular diseases</b>         |                                          |                                         |                                         |                                |                        |                     |
| Global                                 | 25,620,138<br>(18,401,575 to 33,656,619) | 12,153,354<br>(8,787,238 to 15,872,403) | 13,466,784<br>(9,616,125 to 17,652,994) | 380<br>(274 to 498)            | 343<br>(248 to 448)    | 421<br>(301 to 551) |
| Andean Latin America                   | 113,341<br>(80,268 to 150,399)           | 49,023<br>(35,166 to 64,580)            | 64,317<br>(44,822 to 85,583)            | 241<br>(172 to 318)            | 203<br>(146 to 267)    | 282<br>(199 to 373) |
| Australasia                            | 97,598<br>(71,177 to 126,915)            | 45,809<br>(33,415 to 59,895)            | 51,789<br>(37,564 to 67,460)            | 249<br>(181 to 325)            | 218<br>(159 to 286)    | 283<br>(205 to 370) |
| Caribbean                              | 152,639<br>(108,578 to 200,538)          | 70,718<br>(50,464 to 92,924)            | 81,921<br>(58,121 to 108,304)           | 349<br>(248 to 458)            | 307<br>(219 to 403)    | 396<br>(282 to 524) |
| Central Asia                           | 272,967<br>(193,757 to 357,169)          | 144,891<br>(103,304 to 189,886)         | 128,076<br>(90,996 to 167,811)          | 422<br>(300 to 551)            | 400<br>(285 to 524)    | 450<br>(318 to 588) |
| Central Europe                         | 812,093<br>(581,858 to 1,068,991)        | 400,755<br>(288,756 to 524,641)         | 411,339<br>(291,367 to 543,231)         | 458<br>(328 to 605)            | 392<br>(281 to 515)    | 538<br>(382 to 710) |
| Central Latin America                  | 573,193<br>(405,075 to 766,177)          | 275,143<br>(194,421 to 366,154)         | 298,050<br>(207,978 to 399,985)         | 292<br>(207 to 389)            | 265<br>(188 to 352)    | 322<br>(226 to 430) |
| Central Sub-Saharan Africa             | 207,146<br>(147,540 to 273,236)          | 113,444<br>(81,275 to 150,304)          | 93,702<br>(66,934 to 124,291)           | 392<br>(283 to 513)            | 414<br>(299 to 549)    | 367<br>(265 to 479) |
| East Asia                              | 6,157,341<br>(4,415,232 to 8,052,645)    | 2,729,922<br>(1,960,100 to 3,548,586)   | 3,427,419<br>(2,436,685 to 4,478,459)   | 405<br>(290 to 532)            | 352<br>(252 to 461)    | 456<br>(324 to 598) |
| Eastern Europe                         | 1,309,704<br>(936,467 to 1,711,540)      | 739,882<br>(530,940 to 960,383)         | 569,822<br>(405,985 to 752,052)         | 415<br>(296 to 543)            | 371<br>(266 to 483)    | 480<br>(342 to 632) |
| Eastern Sub-Saharan Africa             | 898,612<br>(644,379 to 1,192,276)        | 482,802<br>(346,269 to 632,138)         | 415,810<br>(292,368 to 559,993)         | 535<br>(382 to 708)            | 560<br>(404 to 737)    | 504<br>(357 to 672) |
| High-income Asia Pacific               | 863,666<br>(629,465 to 1,126,415)        | 411,522<br>(299,280 to 538,977)         | 452,144<br>(329,225 to 591,515)         | 251<br>(182 to 328)            | 211<br>(153 to 274)    | 297<br>(215 to 389) |
| High-income North America              | 1,873,765<br>(1,366,064 to 2,456,041)    | 907,568<br>(664,458 to 1,188,183)       | 966,197<br>(703,723 to 1,265,372)       | 375<br>(273 to 491)            | 328<br>(240 to 430)    | 429<br>(312 to 562) |
| North Africa and Middle East           | 1,972,018<br>(1,392,330 to 2,623,101)    | 898,283<br>(635,004 to 1,188,618)       | 1,073,735<br>(753,225 to 1,435,632)     | 489<br>(349 to 647)            | 452<br>(322 to 596)    | 528<br>(377 to 698) |
| Oceania                                | 33,684<br>(24,068 to 44,243)             | 16,164<br>(11,612 to 21,192)            | 17,520<br>(12,468 to 23,140)            | 450<br>(325 to 585)            | 430<br>(313 to 559)    | 473<br>(337 to 615) |
| South Asia                             | 4,014,086<br>(2,888,776 to 5,274,493)    | 1,806,938<br>(1,306,206 to 2,369,385)   | 2,207,148<br>(1,575,314 to 2,921,608)   | 325<br>(234 to 425)            | 290<br>(210 to 379)    | 360<br>(258 to 472) |
| Southeast Asia                         | 2,020,718<br>(1,437,149 to 2,637,793)    | 974,026<br>(699,464 to 1,275,889)       | 1,046,692<br>(743,565 to 1,375,268)     | 391<br>(279 to 510)            | 358<br>(258 to 469)    | 425<br>(302 to 556) |
| Southern Latin America                 | 166,762<br>(119,609 to 218,472)          | 87,348<br>(62,550 to 114,535)           | 79,414<br>(57,120 to 104,265)           | 235<br>(168 to 308)            | 213<br>(152 to 280)    | 265<br>(191 to 347) |
| Southern Sub-Saharan Africa            | 193,053<br>(139,524 to 251,231)          | 106,683<br>(77,528 to 138,529)          | 86,370<br>(61,669 to 111,854)           | 422<br>(307 to 547)            | 413<br>(302 to 537)    | 423<br>(304 to 548) |
| Tropical Latin America                 | 780,085<br>(554,095 to 1,038,496)        | 346,108<br>(247,942 to 460,233)         | 433,977<br>(304,877 to 579,732)         | 406<br>(290 to 538)            | 332<br>(238 to 441)    | 494<br>(350 to 659) |
| Western Europe                         | 2,050,932<br>(1,478,472 to 2,709,850)    | 995,368<br>(721,161 to 1,309,241)       | 1,055,564<br>(762,279 to 1,401,311)     | 277<br>(199 to 366)            | 237<br>(170 to 313)    | 320<br>(231 to 426) |
| Western Sub-Saharan Africa             | 1,056,737<br>(753,667 to 1,393,913)      | 550,957<br>(393,878 to 728,083)         | 505,779<br>(356,982 to 666,514)         | 617<br>(443 to 815)            | 651<br>(469 to 863)    | 580<br>(416 to 761) |
| <b>Atrial fibrillation and flutter</b> |                                          |                                         |                                         |                                |                        |                     |
| Global                                 | 2,634,581<br>(1,782,603 to 3,637,262)    | 1,120,738<br>(756,014 to 1,548,898)     | 1,513,842<br>(1,022,789 to 2,089,929)   | 41<br>(28 to 57)               | 32<br>(22 to 44)       | 51<br>(35 to 71)    |
| Andean Latin America                   | 9,774<br>(6,557 to 13,541)               | 3,833<br>(2,575 to 5,335)               | 5,941<br>(3,963 to 8,311)               | 23<br>(16 to 33)               | 17<br>(12 to 24)       | 31<br>(21 to 43)    |
| Australasia                            | 19,039<br>(12,998 to 26,069)             | 7,104<br>(4,860 to 9,800)               | 11,935<br>(8,060 to 16,207)             | 49<br>(33 to 67)               | 33<br>(23 to 46)       | 65<br>(44 to 89)    |
| Caribbean                              | 10,074<br>(6,725 to 13,886)              | 3,961<br>(2,653 to 5,518)               | 6,114<br>(4,123 to 8,432)               | 24<br>(16 to 32)               | 17<br>(11 to 24)       | 31<br>(21 to 43)    |
| Central Asia                           | 30,050<br>(19,886 to 41,529)             | 13,566<br>(9,054 to 18,723)             | 16,484<br>(10,957 to 22,998)            | 49<br>(33 to 68)               | 40<br>(27 to 55)       | 60<br>(40 to 84)    |
| Central Europe                         | 107,768<br>(74,873 to 146,496)           | 53,808<br>(37,114 to 73,499)            | 53,960<br>(37,312 to 73,711)            | 59<br>(41 to 80)               | 50<br>(34 to 68)       | 69<br>(48 to 95)    |
| Central Latin America                  | 41,885<br>(27,850 to 57,647)             | 16,531<br>(11,100 to 22,801)            | 25,353<br>(16,971 to 34,985)            | 24<br>(16 to 32)               | 17<br>(12 to 24)       | 31<br>(21 to 43)    |
| Central Sub-Saharan Africa             | 7,848<br>(5,315 to 10,774)               | 3,072<br>(2,050 to 4,291)               | 4,776<br>(3,204 to 6,623)               | 21<br>(14 to 28)               | 15<br>(10 to 21)       | 28<br>(19 to 38)    |
| East Asia                              | 529,184<br>(350,483 to 742,168)          | 225,110<br>(149,020 to 315,950)         | 304,074<br>(201,520 to 428,833)         | 35<br>(23 to 49)               | 29<br>(19 to 40)       | 41<br>(27 to 58)    |
| Eastern Europe                         | 148,831<br>(100,509 to 205,437)          | 79,923<br>(53,786 to 110,616)           | 68,909<br>(45,974 to 95,428)            | 47<br>(32 to 65)               | 38<br>(26 to 53)       | 58<br>(39 to 81)    |
| Eastern Sub-Saharan Africa             | 26,549<br>(17,813 to 36,766)             | 10,311<br>(6,902 to 14,527)             | 16,238<br>(10,897 to 22,538)            | 20<br>(14 to 28)               | 14.8<br>(10.0 to 20.6) | 27<br>(18 to 37)    |
| High-income Asia Pacific               | 89,723<br>(59,705 to 124,296)            | 26,744<br>(17,951 to 36,926)            | 62,979<br>(41,849 to 88,022)            | 24<br>(16 to 34)               | 11.7<br>(7.8 to 16.3)  | 39<br>(26 to 55)    |
| High-income North America              | 491,194<br>(345,118 to 668,254)          | 215,350<br>(151,456 to 292,996)         | 275,844<br>(192,995 to 374,608)         | 96<br>(67 to 130)              | 73<br>(51 to 100)      | 121<br>(85 to 165)  |
| North Africa and Middle East           | 74,542<br>(49,217 to 103,048)            | 29,308<br>(19,635 to 40,569)            | 45,235<br>(29,844 to 62,434)            | 24<br>(16 to 33)               | 18<br>(12 to 25)       | 30<br>(20 to 42)    |
| Oceania                                | 1,766<br>(1,184 to 2,456)                | 727<br>(483 to 1,005)                   | 1,038<br>(699 to 1,463)                 | 34<br>(23 to 47)               | 27<br>(18 to 37)       | 44<br>(29 to 60)    |
| South Asia                             | 305,607<br>(206,039 to 422,781)          | 112,003<br>(75,844 to 153,441)          | 193,605<br>(129,288 to 267,828)         | 30<br>(20 to 41)               | 21<br>(14 to 29)       | 39<br>(26 to 53)    |
| Southeast Asia                         | 159,857<br>(106,421 to 222,052)          | 68,310<br>(45,775 to 94,938)            | 91,547<br>(60,545 to 127,229)           | 35<br>(23 to 48)               | 27<br>(18 to 38)       | 44<br>(30 to 61)    |
| Southern Latin America                 | 29,094<br>(19,312 to 40,154)             | 10,711<br>(7,143 to 14,883)             | 18,383<br>(12,142 to 25,479)            | 41<br>(27 to 56)               | 25<br>(17 to 35)       | 61<br>(41 to 85)    |
| Southern Sub-Saharan Africa            | 8,678<br>(5,840 to 11,917)               | 3,850<br>(2,587 to 5,364)               | 4,828<br>(3,254 to 6,608)               | 21<br>(14 to 28)               | 15<br>(10 to 22)       | 28<br>(19 to 39)    |
| Tropical Latin America                 | 43,148<br>(28,992 to 60,021)             | 18,011<br>(12,194 to 25,143)            | 25,137<br>(16,958 to 34,897)            | 24<br>(16 to 33)               | 18<br>(12 to 25)       | 32<br>(22 to 45)    |
| Western Europe                         | 472,856<br>(319,760 to 653,087)          | 208,312<br>(141,652 to 285,839)         | 264,543<br>(177,781 to 362,892)         | 63<br>(42 to 87)               | 47<br>(31 to 64)       | 80<br>(54 to 110)   |
| Western Sub-Saharan Africa             | 27,115<br>(18,155 to 38,150)             | 10,193<br>(6,819 to 14,362)             | 16,922<br>(11,220 to 23,438)            | 21<br>(14 to 29)               | 15<br>(10 to 22)       | 28<br>(19 to 39)    |
| <b>Cardiomyopathy and myocarditis</b>  |                                          |                                         |                                         |                                |                        |                     |
| Global                                 | 275,097<br>(190,348 to 377,894)          | 149,814<br>(103,872 to 205,621)         | 125,283<br>(87,201 to 172,831)          | 4.1<br>(2.9 to 5.7)            | 4.2<br>(2.9 to 5.7)    | 3.9<br>(2.7 to 5.4) |
| Andean Latin America                   | 1,256<br>(847 to 1,741)                  | 691<br>(464 to 964)                     | 566<br>(384 to 796)                     | 2.6<br>(1.8 to 3.6)            | 2.7<br>(1.8 to 3.8)    | 2.4<br>(1.7 to 3.4) |
| Australasia                            | 2,554<br>(1,749 to 3,526)                | 1,401<br>(950 to 1,946)                 | 1,154<br>(785 to 1,591)                 | 6.5<br>(4.4 to 9.0)            | 6.2<br>(4.2 to 8.6)    | 6.7<br>(4.5 to 9.2) |
| Caribbean                              | 2,552<br>(1,766 to 3,530)                | 1,324<br>(902 to 1,843)                 | 1,227<br>(844 to 1,705)                 | 5.7<br>(4.0 to 8.0)            | 5.6<br>(3.8 to 7.8)    | 5.8<br>(4.0 to 8.1) |
| Central Asia                           | 1,147<br>(783 to 1,581)                  | 540<br>(369 to 745)                     | 607<br>(417 to 842)                     | 1.5<br>(1.1 to 2.1)            | 1.4<br>(1.0 to 1.9)    | 1.6<br>(1.1 to 2.3) |



|                                     |                                       |                                     |                                       |                       |                       |                       |
|-------------------------------------|---------------------------------------|-------------------------------------|---------------------------------------|-----------------------|-----------------------|-----------------------|
| Central Europe                      | 9,167<br>(6,263 to 12,540)            | 5,281<br>(3,650 to 7,233)           | 3,886<br>(2,655 to 5,303)             | 5.3<br>(3.6 to 7.3)   | 4.9<br>(3.4 to 6.7)   | 5.5<br>(3.8 to 7.6)   |
| Central Latin America               | 9,093<br>(6,226 to 12,476)            | 4,841<br>(3,363 to 6,627)           | 4,252<br>(2,870 to 5,912)             | 4.2<br>(2.9 to 5.8)   | 4.3<br>(3.0 to 5.9)   | 4.1<br>(2.8 to 5.6)   |
| Central Sub-Saharan Africa          | 4,374<br>(2,968 to 6,066)             | 2,096<br>(1,437 to 2,933)           | 2,278<br>(1,533 to 3,183)             | 8.0<br>(5.5 to 11.1)  | 7.5<br>(5.2 to 10.3)  | 8.6<br>(5.9 to 12.0)  |
| East Asia                           | 28,495<br>(19,802 to 39,340)          | 16,044<br>(11,058 to 22,088)        | 12,451<br>(8,638 to 17,188)           | 2.2<br>(1.5 to 3.1)   | 2.5<br>(1.7 to 3.4)   | 1.8<br>(1.3 to 2.5)   |
| Eastern Europe                      | 12,038<br>(8,110 to 16,764)           | 6,240<br>(4,204 to 8,768)           | 5,798<br>(3,881 to 8,134)             | 4.2<br>(2.8 to 5.9)   | 3.4<br>(2.3 to 4.8)   | 5.0<br>(3.4 to 7.0)   |
| Eastern Sub-Saharan Africa          | 11,303<br>(7,566 to 15,865)           | 5,366<br>(3,590 to 7,536)           | 5,937<br>(3,982 to 8,429)             | 6.0<br>(4.1 to 8.5)   | 5.4<br>(3.7 to 7.6)   | 6.7<br>(4.5 to 9.4)   |
| High-income Asia Pacific            | 16,345<br>(11,264 to 22,596)          | 10,532<br>(7,230 to 14,535)         | 5,813<br>(4,019 to 8,022)             | 4.9<br>(3.4 to 6.8)   | 5.0<br>(3.5 to 7.0)   | 4.5<br>(3.1 to 6.1)   |
| High-income North America           | 49,397<br>(34,706 to 67,877)          | 27,657<br>(19,091 to 37,610)        | 21,740<br>(15,202 to 29,834)          | 10.0<br>(7.0 to 13.8) | 9.5<br>(6.6 to 12.9)  | 10.2<br>(7.1 to 14.0) |
| North Africa and Middle East        | 18,191<br>(12,722 to 25,105)          | 8,933<br>(6,223 to 12,247)          | 9,258<br>(6,409 to 12,832)            | 4.5<br>(3.2 to 6.2)   | 4.5<br>(3.2 to 6.2)   | 4.4<br>(3.1 to 6.1)   |
| Oceania                             | 202<br>(139 to 278)                   | 113<br>(78 to 155)                  | 89<br>(61 to 124)                     | 3.4<br>(2.4 to 4.6)   | 3.9<br>(2.7 to 5.4)   | 2.6<br>(1.8 to 3.5)   |
| South Asia                          | 15,560<br>(10,818 to 21,566)          | 8,508<br>(5,858 to 11,850)          | 7,053<br>(4,885 to 9,782)             | 1.2<br>(0.8 to 1.6)   | 1.4<br>(1.0 to 1.9)   | 0.9<br>(0.6 to 1.3)   |
| Southeast Asia                      | 17,717<br>(12,295 to 24,476)          | 9,273<br>(6,326 to 12,836)          | 8,443<br>(5,841 to 11,697)            | 3.6<br>(2.5 to 4.9)   | 3.6<br>(2.5 to 4.9)   | 3.5<br>(2.4 to 4.8)   |
| Southern Latin America              | 3,330<br>(2,218 to 4,609)             | 2,243<br>(1,505 to 3,090)           | 1,086<br>(698 to 1,551)               | 4.5<br>(3.0 to 6.2)   | 4.8<br>(3.2 to 6.8)   | 3.7<br>(2.4 to 5.2)   |
| Southern Sub-Saharan Africa         | 6,993<br>(4,914 to 9,595)             | 3,566<br>(2,497 to 4,871)           | 3,427<br>(2,379 to 4,704)             | 15<br>(10 to 20)      | 13.1<br>(9.2 to 17.8) | 17<br>(12 to 24)      |
| Tropical Latin America              | 20,263<br>(14,017 to 27,919)          | 10,064<br>(6,980 to 13,717)         | 10,199<br>(7,034 to 14,043)           | 10.9<br>(7.6 to 15.0) | 10.0<br>(6.9 to 13.6) | 11.9<br>(8.3 to 16.5) |
| Western Europe                      | 27,870<br>(19,348 to 38,356)          | 17,650<br>(12,274 to 23,967)        | 10,220<br>(6,989 to 14,239)           | 3.6<br>(2.5 to 4.9)   | 3.5<br>(2.4 to 4.8)   | 3.4<br>(2.3 to 4.7)   |
| Western Sub-Saharan Africa          | 17,248<br>(12,021 to 23,890)          | 7,451<br>(5,189 to 10,415)          | 9,797<br>(6,799 to 13,596)            | 9.5<br>(6.6 to 13.0)  | 8.2<br>(5.7 to 11.2)  | 10.9<br>(7.6 to 15.1) |
| <b>Endocarditis</b>                 |                                       |                                     |                                       |                       |                       |                       |
| Global                              | 12,325<br>(8,509 to 17,114)           | 9,076<br>(6,284 to 12,591)          | 3,248<br>(2,202 to 4,525)             | 0.2<br>(0.1 to 0.3)   | 0.3<br>(0.2 to 0.4)   | 0.1<br>(0.1 to 0.1)   |
| Andean Latin America                | 17<br>(11 to 23)                      | 12.1<br>(8.3 to 17.1)               | 4.5<br>(2.9 to 6.5)                   | 0.0<br>(0.0 to 0.1)   | 0.0<br>(0.0 to 0.1)   | 0.0<br>(0.0 to 0.0)   |
| Australasia                         | 62<br>(41 to 88)                      | 29<br>(19 to 43)                    | 32<br>(21 to 46)                      | 0.2<br>(0.1 to 0.2)   | 0.2<br>(0.1 to 0.2)   | 0.2<br>(0.1 to 0.3)   |
| Caribbean                           | 131<br>(91 to 181)                    | 125<br>(86 to 172)                  | 6.0<br>(4.1 to 8.5)                   | 0.3<br>(0.2 to 0.4)   | 0.5<br>(0.4 to 0.7)   | 0.0<br>(0.0 to 0.0)   |
| Central Asia                        | 69<br>(47 to 98)                      | 36<br>(25 to 51)                    | 33<br>(22 to 46)                      | 0.1<br>(0.1 to 0.2)   | 0.1<br>(0.1 to 0.1)   | 0.1<br>(0.1 to 0.2)   |
| Central Europe                      | 123<br>(85 to 172)                    | 32<br>(21 to 45)                    | 91<br>(62 to 129)                     | 0.1<br>(0.1 to 0.1)   | 0.1<br>(0.0 to 0.1)   | 0.1<br>(0.1 to 0.2)   |
| Central Latin America               | 223<br>(150 to 310)                   | 147<br>(99 to 204)                  | 76<br>(50 to 107)                     | 0.1<br>(0.1 to 0.1)   | 0.1<br>(0.1 to 0.2)   | 0.1<br>(0.1 to 0.1)   |
| Central Sub-Saharan Africa          | 60<br>(40 to 83)                      | 35<br>(24 to 49)                    | 25<br>(17 to 34)                      | 0.1<br>(0.1 to 0.1)   | 0.1<br>(0.1 to 0.1)   | 0.1<br>(0.1 to 0.1)   |
| East Asia                           | 714<br>(475 to 1,035)                 | 319<br>(207 to 463)                 | 394<br>(261 to 570)                   | 0.1<br>(0.0 to 0.1)   | 0.0<br>(0.0 to 0.1)   | 0.1<br>(0.0 to 0.1)   |
| Eastern Europe                      | 248<br>(170 to 351)                   | 150<br>(101 to 212)                 | 99<br>(67 to 138)                     | 0.1<br>(0.1 to 0.1)   | 0.1<br>(0.1 to 0.1)   | 0.1<br>(0.1 to 0.1)   |
| Eastern Sub-Saharan Africa          | 212<br>(142 to 295)                   | 120<br>(80 to 167)                  | 92<br>(62 to 128)                     | 0.1<br>(0.1 to 0.1)   | 0.1<br>(0.1 to 0.1)   | 0.1<br>(0.1 to 0.1)   |
| High-income Asia Pacific            | 440<br>(294 to 625)                   | 264<br>(173 to 380)                 | 175<br>(117 to 253)                   | 0.1<br>(0.1 to 0.2)   | 0.2<br>(0.1 to 0.2)   | 0.1<br>(0.1 to 0.2)   |
| High-income North America           | 1,313<br>(885 to 1,863)               | 664<br>(438 to 935)                 | 649<br>(440 to 932)                   | 0.3<br>(0.2 to 0.4)   | 0.3<br>(0.2 to 0.4)   | 0.3<br>(0.2 to 0.4)   |
| North Africa and Middle East        | 1,921<br>(1,328 to 2,640)             | 1,804<br>(1,247 to 2,479)           | 117<br>(79 to 163)                    | 0.6<br>(0.4 to 0.8)   | 1.1<br>(0.7 to 1.4)   | 0.0<br>(0.0 to 0.1)   |
| Oceania                             | 65<br>(46 to 89)                      | 48<br>(34 to 66)                    | 17<br>(11 to 23)                      | 1.4<br>(1.0 to 2.0)   | 1.9<br>(1.4 to 2.6)   | 0.8<br>(0.6 to 1.1)   |
| South Asia                          | 1,302<br>(858 to 1,837)               | 715<br>(473 to 1,023)               | 586<br>(387 to 822)                   | 0.1<br>(0.1 to 0.1)   | 0.1<br>(0.1 to 0.2)   | 0.1<br>(0.1 to 0.1)   |
| Southeast Asia                      | 507<br>(339 to 704)                   | 292<br>(193 to 407)                 | 215<br>(145 to 297)                   | 0.1<br>(0.1 to 0.1)   | 0.1<br>(0.1 to 0.1)   | 0.1<br>(0.1 to 0.1)   |
| Southern Latin America              | 594<br>(414 to 836)                   | 590<br>(410 to 831)                 | 4.2<br>(1.7 to 7.2)                   | 0.8<br>(0.5 to 1.1)   | 1.3<br>(0.9 to 1.8)   | 0.0<br>(0.0 to 0.0)   |
| Southern Sub-Saharan Africa         | 41<br>(27 to 59)                      | 22<br>(15 to 32)                    | 19<br>(12 to 27)                      | 0.1<br>(0.0 to 0.1)   | 0.1<br>(0.1 to 0.1)   | 0.0<br>(0.0 to 0.1)   |
| Tropical Latin America              | 226<br>(149 to 329)                   | 105<br>(67 to 156)                  | 120<br>(80 to 174)                    | 0.1<br>(0.1 to 0.2)   | 0.1<br>(0.1 to 0.2)   | 0.1<br>(0.1 to 0.2)   |
| Western Europe                      | 3,811<br>(2,663 to 5,249)             | 3,428<br>(2,395 to 4,737)           | 383<br>(262 to 535)                   | 0.4<br>(0.3 to 0.6)   | 0.7<br>(0.5 to 0.9)   | 0.1<br>(0.1 to 0.2)   |
| Western Sub-Saharan Africa          | 248<br>(168 to 345)                   | 139<br>(94 to 193)                  | 109<br>(73 to 151)                    | 0.1<br>(0.1 to 0.2)   | 0.1<br>(0.1 to 0.2)   | 0.1<br>(0.1 to 0.1)   |
| <b>Hemorrhagic and other stroke</b> |                                       |                                     |                                       |                       |                       |                       |
| Global                              | 2,795,183<br>(1,945,790 to 3,749,593) | 1,326,256<br>(915,041 to 1,777,544) | 1,468,927<br>(1,023,737 to 1,971,159) | 40<br>(28 to 53)      | 37<br>(26 to 50)      | 43<br>(30 to 58)      |
| Andean Latin America                | 12,480<br>(8,643 to 16,708)           | 6,795<br>(4,719 to 9,197)           | 5,684<br>(3,899 to 7,665)             | 25<br>(17 to 33)      | 26<br>(18 to 35)      | 23<br>(16 to 31)      |
| Australasia                         | 6,827<br>(4,740 to 9,090)             | 3,689<br>(2,580 to 4,949)           | 3,138<br>(2,189 to 4,209)             | 19<br>(13 to 25)      | 18<br>(14 to 26)      | 18<br>(12 to 24)      |
| Caribbean                           | 17,206<br>(11,825 to 23,152)          | 9,134<br>(6,333 to 12,198)          | 8,072<br>(5,607 to 10,904)            | 39<br>(27 to 52)      | 40<br>(28 to 53)      | 38<br>(26 to 51)      |
| Central Asia                        | 42,683<br>(29,769 to 57,046)          | 23,313<br>(16,235 to 31,231)        | 19,370<br>(13,457 to 25,908)          | 60<br>(42 to 80)      | 60<br>(41 to 80)      | 60<br>(42 to 80)      |
| Central Europe                      | 71,096<br>(50,000 to 94,550)          | 41,129<br>(28,909 to 54,890)        | 29,967<br>(20,831 to 39,778)          | 44<br>(31 to 60)      | 48<br>(33 to 64)      | 41<br>(29 to 55)      |
| Central Latin America               | 27,363<br>(18,914 to 36,967)          | 14,161<br>(9,737 to 19,242)         | 13,202<br>(9,146 to 17,852)           | 12.9<br>(8.9 to 17.4) | 12.8<br>(8.8 to 17.3) | 13.1<br>(9.1 to 17.6) |
| Central Sub-Saharan Africa          | 26,845<br>(18,654 to 36,206)          | 15,448<br>(10,807 to 20,634)        | 11,397<br>(7,900 to 15,498)           | 48<br>(33 to 64)      | 53<br>(37 to 71)      | 41<br>(29 to 56)      |
| East Asia                           | 745,389<br>(515,228 to 1,006,704)     | 302,927<br>(207,379 to 409,209)     | 442,462<br>(307,566 to 598,057)       | 46<br>(32 to 63)      | 38<br>(26 to 52)      | 54<br>(38 to 73)      |
| Eastern Europe                      | 164,286<br>(114,259 to 217,043)       | 99,163<br>(68,732 to 131,764)       | 65,123<br>(44,530 to 86,459)          | 55<br>(38 to 73)      | 56<br>(38 to 74)      | 55<br>(38 to 73)      |
| Eastern Sub-Saharan Africa          | 126,816<br>(88,331 to 171,716)        | 69,355<br>(48,428 to 94,228)        | 57,461<br>(39,908 to 77,248)          | 60<br>(42 to 80)      | 64<br>(45 to 86)      | 55<br>(38 to 74)      |
| High-income Asia Pacific            | 87,483<br>(60,892 to 116,811)         | 43,860<br>(30,538 to 58,761)        | 43,623<br>(30,220 to 58,187)          | 31<br>(21 to 41)      | 29<br>(21 to 40)      | 32<br>(22 to 43)      |
| High-income North America           | 58,908<br>(41,249 to 79,190)          | 30,442<br>(21,326 to 40,893)        | 28,466<br>(19,926 to 38,188)          | 12.5<br>(8.7 to 16.8) | 12.1<br>(8.4 to 16.3) | 13.0<br>(9.0 to 17.4) |
| North Africa and Middle East        | 163,831<br>(114,512 to 219,253)       | 88,627<br>(62,101 to 118,545)       | 75,204<br>(52,379 to 100,980)         | 37<br>(26 to 50)      | 40<br>(28 to 54)      | 34<br>(24 to 46)      |

|                                   |                                       |                                       |                                       |                       |                       |                        |
|-----------------------------------|---------------------------------------|---------------------------------------|---------------------------------------|-----------------------|-----------------------|------------------------|
| Oceania                           | 5,809<br>(4,030 to 7,805)             | 2,995<br>(2,076 to 4,019)             | 2,814<br>(1,944 to 3,802)             | 72<br>(50 to 96)      | 74<br>(51 to 98)      | 71<br>(49 to 95)       |
| South Asia                        | 594,221<br>(417,010 to 801,637)       | 257,852<br>(179,580 to 347,807)       | 336,368<br>(235,042 to 456,845)       | 42<br>(30 to 57)      | 37<br>(26 to 50)      | 47<br>(33 to 64)       |
| Southeast Asia                    | 307,742<br>(214,972 to 412,393)       | 146,119<br>(100,407 to 194,620)       | 161,623<br>(112,302 to 217,256)       | 53<br>(37 to 71)      | 49<br>(34 to 65)      | 58<br>(40 to 77)       |
| Southern Latin America            | 19,019<br>(13,053 to 25,430)          | 10,315<br>(7,065 to 13,870)           | 8,704<br>(6,030 to 11,644)            | 28<br>(19 to 37)      | 28<br>(19 to 38)      | 28<br>(19 to 37)       |
| Southern Sub-Saharan Africa       | 27,637<br>(19,233 to 37,166)          | 13,957<br>(9,608 to 18,718)           | 13,680<br>(9,447 to 18,372)           | 48<br>(34 to 64)      | 46<br>(32 to 61)      | 51<br>(35 to 68)       |
| Tropical Latin America            | 43,505<br>(30,275 to 58,093)          | 22,150<br>(15,390 to 29,770)          | 21,355<br>(14,729 to 28,547)          | 22<br>(15 to 29)      | 20<br>(14 to 27)      | 23<br>(16 to 31)       |
| Western Europe                    | 136,363<br>(95,256 to 182,659)        | 70,885<br>(49,813 to 94,985)          | 65,478<br>(45,561 to 87,685)          | 21<br>(15 to 28)      | 21<br>(14 to 28)      | 22<br>(15 to 29)       |
| Western Sub-Saharan Africa        | 109,674<br>(76,219 to 148,294)        | 53,940<br>(37,364 to 73,128)          | 55,734<br>(38,855 to 75,521)          | 48<br>(33 to 64)      | 48<br>(34 to 65)      | 46<br>(32 to 62)       |
| <b>Hypertensive heart disease</b> |                                       |                                       |                                       |                       |                       |                        |
| Global                            | 669,988<br>(467,103 to 917,055)       | 369,694<br>(258,706 to 507,247)       | 300,295<br>(209,826 to 411,504)       | 10.5<br>(7.3 to 14.4) | 10.5<br>(7.4 to 14.4) | 10.5<br>(7.3 to 14.3)  |
| Andean Latin America              | 3,220<br>(2,205 to 4,438)             | 1,899<br>(1,290 to 2,624)             | 1,321<br>(901 to 1,820)               | 7.8<br>(5.4 to 10.8)  | 8.4<br>(5.7 to 11.7)  | 7.2<br>(5.0 to 9.9)    |
| Australasia                       | 1,826<br>(1,238 to 2,528)             | 954<br>(648 to 1,339)                 | 872<br>(586 to 1,219)                 | 4.3<br>(2.9 to 6.0)   | 4.1<br>(2.7 to 5.7)   | 4.6<br>(3.1 to 6.4)    |
| Caribbean                         | 7,084<br>(4,952 to 9,724)             | 3,691<br>(2,560 to 5,024)             | 3,393<br>(2,340 to 4,625)             | 16<br>(12 to 23)      | 16<br>(11 to 22)      | 17<br>(12 to 24)       |
| Central Asia                      | 3,884<br>(2,723 to 5,382)             | 2,343<br>(1,626 to 3,223)             | 1,541<br>(1,073 to 2,146)             | 7.0<br>(4.9 to 9.7)   | 7.1<br>(4.9 to 9.8)   | 6.7<br>(4.6 to 9.2)    |
| Central Europe                    | 14,573<br>(10,164 to 19,944)          | 9,711<br>(6,773 to 13,343)            | 4,862<br>(3,395 to 6,662)             | 7.5<br>(5.2 to 10.2)  | 7.9<br>(5.5 to 10.9)  | 6.5<br>(4.5 to 8.9)    |
| Central Latin America             | 22,986<br>(16,024 to 31,517)          | 13,941<br>(9,711 to 19,091)           | 9,045<br>(6,307 to 12,380)            | 13.2<br>(9.2 to 18.0) | 14<br>(10 to 20)      | 11.8<br>(8.3 to 16.2)  |
| Central Sub-Saharan Africa        | 7,464<br>(5,158 to 10,273)            | 3,448<br>(2,395 to 4,727)             | 4,015<br>(2,759 to 5,462)             | 22<br>(15 to 30)      | 19<br>(13 to 26)      | 26<br>(18 to 35)       |
| East Asia                         | 203,246<br>(142,742 to 279,570)       | 104,183<br>(72,881 to 143,753)        | 99,063<br>(68,882 to 136,401)         | 14.1<br>(9.9 to 19.4) | 13.9<br>(9.7 to 19.2) | 14.3<br>(10.0 to 19.7) |
| Eastern Europe                    | 10,371<br>(7,114 to 14,111)           | 7,678<br>(5,283 to 10,450)            | 2,693<br>(1,849 to 3,760)             | 3.1<br>(2.1 to 4.2)   | 3.4<br>(2.3 to 4.5)   | 2.4<br>(1.7 to 3.4)    |
| Eastern Sub-Saharan Africa        | 20,678<br>(14,286 to 28,401)          | 9,383<br>(6,426 to 12,845)            | 11,294<br>(7,868 to 15,564)           | 17<br>(12 to 24)      | 14<br>(10 to 20)      | 21<br>(15 to 29)       |
| High-income Asia Pacific          | 36,570<br>(25,529 to 50,242)          | 24,322<br>(16,949 to 33,423)          | 12,248<br>(8,533 to 16,844)           | 8.7<br>(6.1 to 12.0)  | 9.7<br>(6.7 to 13.3)  | 7.3<br>(5.1 to 10.0)   |
| High-income North America         | 53,323<br>(37,119 to 72,955)          | 31,462<br>(21,978 to 43,024)          | 21,861<br>(15,140 to 29,809)          | 10.3<br>(7.2 to 14.0) | 10.6<br>(7.4 to 14.6) | 9.6<br>(6.6 to 13.0)   |
| North Africa and Middle East      | 22,341<br>(15,471 to 30,586)          | 14,882<br>(10,369 to 20,367)          | 7,459<br>(5,106 to 10,222)            | 7.3<br>(5.1 to 10.0)  | 9.1<br>(6.4 to 12.5)  | 5.3<br>(3.7 to 7.3)    |
| Oceania                           | 273<br>(189 to 371)                   | 157<br>(110 to 215)                   | 116<br>(80 to 160)                    | 6.1<br>(4.3 to 8.4)   | 6.4<br>(4.5 to 8.7)   | 5.8<br>(4.0 to 8.0)    |
| South Asia                        | 124,727<br>(87,802 to 170,494)        | 63,801<br>(44,936 to 86,940)          | 60,926<br>(42,716 to 83,241)          | 12.4<br>(8.7 to 17.0) | 12.3<br>(8.7 to 16.8) | 12.5<br>(8.7 to 17.2)  |
| Southeast Asia                    | 41,151<br>(28,784 to 56,981)          | 25,131<br>(17,600 to 34,679)          | 16,020<br>(10,985 to 22,306)          | 9.5<br>(6.7 to 13.3)  | 10.4<br>(7.3 to 14.5) | 8.4<br>(5.8 to 11.6)   |
| Southern Latin America            | 6,312<br>(4,206 to 8,743)             | 4,085<br>(2,769 to 5,724)             | 2,227<br>(1,472 to 3,090)             | 8.5<br>(5.7 to 11.7)  | 8.9<br>(6.0 to 12.5)  | 7.8<br>(5.2 to 10.8)   |
| Southern Sub-Saharan Africa       | 5,658<br>(4,022 to 7,738)             | 2,844<br>(2,006 to 3,870)             | 2,814<br>(1,978 to 3,845)             | 14<br>(10 to 19)      | 11.7<br>(8.3 to 15.9) | 19<br>(13 to 25)       |
| Tropical Latin America            | 29,291<br>(20,295 to 40,427)          | 16,732<br>(11,655 to 23,127)          | 12,559<br>(8,708 to 17,300)           | 17<br>(12 to 23)      | 17<br>(12 to 23)      | 17<br>(12 to 23)       |
| Western Europe                    | 28,859<br>(19,875 to 39,949)          | 18,081<br>(12,423 to 24,931)          | 10,778<br>(7,346 to 14,847)           | 3.1<br>(2.2 to 4.4)   | 3.2<br>(2.2 to 4.5)   | 2.9<br>(2.0 to 4.1)    |
| Western Sub-Saharan Africa        | 26,153<br>(18,503 to 35,824)          | 10,966<br>(7,650 to 15,010)           | 15,187<br>(10,688 to 20,717)          | 23<br>(16 to 32)      | 19<br>(13 to 26)      | 28<br>(20 to 38)       |
| <b>Ischemic heart disease</b>     |                                       |                                       |                                       |                       |                       |                        |
| Global                            | 7,274,736<br>(4,958,633 to 9,940,309) | 3,262,511<br>(2,231,014 to 4,442,745) | 4,012,225<br>(2,730,805 to 5,530,231) | 110<br>(75 to 150)    | 93<br>(63 to 126)     | 128<br>(88 to 176)     |
| Andean Latin America              | 33,174<br>(22,449 to 45,219)          | 14,810<br>(10,078 to 20,292)          | 18,365<br>(12,402 to 25,013)          | 77<br>(52 to 105)     | 65<br>(44 to 89)      | 90<br>(61 to 122)      |
| Australasia                       | 26,747<br>(18,634 to 36,530)          | 12,209<br>(8,564 to 16,573)           | 14,538<br>(10,032 to 19,860)          | 67<br>(46 to 91)      | 56<br>(39 to 76)      | 78<br>(54 to 107)      |
| Caribbean                         | 52,881<br>(36,330 to 72,745)          | 23,581<br>(16,233 to 32,401)          | 29,299<br>(20,291 to 40,180)          | 122<br>(84 to 168)    | 102<br>(70 to 140)    | 145<br>(100 to 198)    |
| Central Asia                      | 109,789<br>(74,893 to 151,471)        | 60,092<br>(40,906 to 82,556)          | 49,696<br>(33,913 to 68,975)          | 176<br>(120 to 242)   | 170<br>(115 to 232)   | 184<br>(125 to 254)    |
| Central Europe                    | 304,630<br>(208,034 to 418,598)       | 138,164<br>(94,571 to 189,739)        | 166,466<br>(113,074 to 228,394)       | 169<br>(115 to 232)   | 132<br>(90 to 181)    | 215<br>(147 to 295)    |
| Central Latin America             | 218,215<br>(149,390 to 300,906)       | 103,468<br>(70,889 to 141,561)        | 114,747<br>(78,298 to 158,682)        | 117<br>(80 to 160)    | 103<br>(71 to 141)    | 132<br>(90 to 182)     |
| Central Sub-Saharan Africa        | 14,685<br>(10,076 to 20,241)          | 6,562<br>(4,493 to 9,003)             | 8,123<br>(5,577 to 11,174)            | 34<br>(24 to 47)      | 29<br>(20 to 40)      | 40<br>(28 to 55)       |
| East Asia                         | 1,407,888<br>(949,403 to 1,940,296)   | 611,494<br>(410,795 to 839,671)       | 796,394<br>(539,574 to 1,101,829)     | 88<br>(59 to 121)     | 77<br>(52 to 105)     | 100<br>(67 to 137)     |
| Eastern Europe                    | 607,365<br>(407,796 to 832,928)       | 319,771<br>(215,200 to 438,104)       | 287,594<br>(193,398 to 397,727)       | 190<br>(127 to 260)   | 156<br>(105 to 214)   | 241<br>(162 to 332)    |
| Eastern Sub-Saharan Africa        | 201,488<br>(132,469 to 280,440)       | 82,465<br>(54,720 to 114,426)         | 119,023<br>(78,138 to 168,580)        | 133<br>(88 to 183)    | 104<br>(69 to 144)    | 166<br>(109 to 233)    |
| High-income Asia Pacific          | 235,301<br>(164,174 to 321,827)       | 115,922<br>(81,117 to 157,760)        | 119,379<br>(83,081 to 164,015)        | 63<br>(44 to 87)      | 52<br>(36 to 71)      | 75<br>(52 to 103)      |
| High-income North America         | 533,547<br>(376,872 to 722,963)       | 253,083<br>(178,292 to 343,085)       | 280,464<br>(197,645 to 381,053)       | 103<br>(73 to 140)    | 87<br>(61 to 118)     | 123<br>(86 to 167)     |
| North Africa and Middle East      | 485,724<br>(332,330 to 671,890)       | 214,792<br>(147,136 to 294,531)       | 270,932<br>(184,709 to 378,172)       | 142<br>(98 to 195)    | 123<br>(85 to 168)    | 161<br>(111 to 223)    |
| Oceania                           | 4,475<br>(3,077 to 6,116)             | 2,053<br>(1,411 to 2,792)             | 2,422<br>(1,664 to 3,340)             | 79<br>(55 to 108)     | 72<br>(49 to 97)      | 87<br>(60 to 119)      |
| South Asia                        | 1,489,690<br>(1,007,634 to 2,052,674) | 609,190<br>(414,322 to 828,525)       | 880,500<br>(593,027 to 1,216,961)     | 132<br>(90 to 181)    | 110<br>(75 to 150)    | 154<br>(104 to 212)    |
| Southeast Asia                    | 527,905<br>(356,289 to 729,512)       | 246,027<br>(166,897 to 336,237)       | 281,878<br>(187,196 to 392,703)       | 108<br>(73 to 147)    | 96<br>(65 to 130)     | 120<br>(81 to 167)     |
| Southern Latin America            | 28,475<br>(19,290 to 38,354)          | 14,194<br>(9,742 to 18,987)           | 14,281<br>(9,693 to 19,338)           | 39<br>(27 to 53)      | 33<br>(22 to 44)      | 48<br>(33 to 65)       |
| Southern Sub-Saharan Africa       | 40,815<br>(27,344 to 56,358)          | 17,393<br>(11,701 to 23,867)          | 23,421<br>(15,618 to 32,727)          | 88<br>(59 to 121)     | 66<br>(45 to 91)      | 116<br>(78 to 160)     |
| Tropical Latin America            | 273,909<br>(187,077 to 376,880)       | 114,628<br>(78,748 to 156,305)        | 159,281<br>(108,358 to 220,704)       | 145<br>(99 to 198)    | 111<br>(76 to 151)    | 185<br>(126 to 254)    |
| Western Europe                    | 542,221<br>(369,725 to 742,222)       | 258,514<br>(176,961 to 350,841)       | 283,707<br>(192,859 to 386,405)       | 72<br>(48 to 98)      | 60<br>(41 to 83)      | 85<br>(57 to 116)      |
| Western Sub-Saharan Africa        | 135,813<br>(88,567 to 191,105)        | 44,097<br>(29,149 to 61,692)          | 91,716<br>(60,469 to 130,760)         | 84<br>(55 to 117)     | 55<br>(37 to 77)      | 115<br>(75 to 160)     |
| <b>Ischemic stroke</b>            |                                       |                                       |                                       |                       |                       |                        |

|                                                      |                                       |                                       |                                       |                       |                       |                       |
|------------------------------------------------------|---------------------------------------|---------------------------------------|---------------------------------------|-----------------------|-----------------------|-----------------------|
| Global                                               | 3,659,982<br>(2,559,278 to 4,874,934) | 1,741,480<br>(1,221,066 to 2,321,574) | 1,918,502<br>(1,339,942 to 2,554,020) | 55<br>(38 to 73)      | 50<br>(35 to 66)      | 61<br>(43 to 81)      |
| Andean Latin America                                 | 33,174<br>(22,449 to 45,219)          | 14,810<br>(10,078 to 20,292)          | 18,365<br>(12,402 to 25,013)          | 77<br>(52 to 105)     | 65<br>(44 to 89)      | 90<br>(61 to 122)     |
| Australasia                                          | 26,747<br>(18,634 to 36,530)          | 12,209<br>(8,564 to 16,573)           | 14,538<br>(10,032 to 19,860)          | 67<br>(46 to 91)      | 56<br>(39 to 76)      | 78<br>(54 to 107)     |
| Caribbean                                            | 52,881<br>(36,330 to 72,745)          | 23,581<br>(16,233 to 32,401)          | 29,299<br>(20,291 to 40,180)          | 122<br>(84 to 168)    | 102<br>(70 to 140)    | 145<br>(100 to 198)   |
| Central Asia                                         | 109,789<br>(74,893 to 151,471)        | 60,092<br>(40,906 to 82,556)          | 49,696<br>(33,913 to 68,975)          | 176<br>(120 to 242)   | 170<br>(115 to 232)   | 184<br>(125 to 254)   |
| Central Europe                                       | 304,630<br>(208,034 to 418,598)       | 138,164<br>(94,571 to 189,739)        | 166,466<br>(113,074 to 228,394)       | 169<br>(115 to 232)   | 132<br>(90 to 181)    | 215<br>(147 to 295)   |
| Central Latin America                                | 218,215<br>(149,390 to 300,906)       | 103,468<br>(70,889 to 141,561)        | 114,747<br>(78,298 to 158,682)        | 117<br>(80 to 160)    | 103<br>(71 to 141)    | 132<br>(90 to 182)    |
| Central Sub-Saharan Africa                           | 14,685<br>(10,076 to 20,241)          | 6,562<br>(4,493 to 9,003)             | 8,123<br>(5,577 to 11,174)            | 34<br>(24 to 47)      | 29<br>(20 to 40)      | 40<br>(28 to 55)      |
| East Asia                                            | 1,407,888<br>(949,403 to 1,940,296)   | 611,494<br>(410,795 to 839,671)       | 796,394<br>(539,574 to 1,101,829)     | 88<br>(59 to 121)     | 77<br>(52 to 105)     | 100<br>(67 to 137)    |
| Eastern Europe                                       | 607,365<br>(407,796 to 832,928)       | 319,771<br>(215,200 to 438,104)       | 287,594<br>(193,398 to 397,727)       | 190<br>(127 to 260)   | 156<br>(105 to 214)   | 241<br>(162 to 332)   |
| Eastern Sub-Saharan Africa                           | 201,488<br>(132,469 to 280,440)       | 82,465<br>(54,720 to 114,426)         | 119,023<br>(78,138 to 168,580)        | 133<br>(88 to 183)    | 104<br>(69 to 144)    | 166<br>(109 to 233)   |
| High-income Asia Pacific                             | 235,301<br>(164,174 to 321,827)       | 115,922<br>(81,117 to 157,760)        | 119,379<br>(83,081 to 164,015)        | 63<br>(44 to 87)      | 52<br>(36 to 71)      | 75<br>(52 to 103)     |
| High-income North America                            | 533,547<br>(376,872 to 722,963)       | 253,083<br>(178,292 to 343,085)       | 280,464<br>(197,645 to 381,053)       | 103<br>(73 to 140)    | 87<br>(61 to 118)     | 123<br>(86 to 167)    |
| North Africa and Middle East                         | 485,724<br>(332,330 to 671,890)       | 214,792<br>(147,136 to 294,531)       | 270,932<br>(184,709 to 378,172)       | 142<br>(98 to 195)    | 123<br>(85 to 168)    | 161<br>(111 to 223)   |
| Oceania                                              | 4,475<br>(3,077 to 6,116)             | 2,053<br>(1,411 to 2,792)             | 2,422<br>(1,664 to 3,340)             | 79<br>(55 to 108)     | 72<br>(49 to 97)      | 87<br>(60 to 119)     |
| South Asia                                           | 1,489,690<br>(1,007,634 to 2,052,674) | 609,190<br>(414,322 to 828,525)       | 880,500<br>(593,027 to 1,216,961)     | 132<br>(90 to 181)    | 110<br>(75 to 150)    | 154<br>(104 to 212)   |
| Southeast Asia                                       | 527,905<br>(356,289 to 729,512)       | 246,027<br>(166,897 to 336,237)       | 281,878<br>(187,196 to 392,703)       | 108<br>(73 to 147)    | 96<br>(65 to 130)     | 120<br>(81 to 167)    |
| Southern Latin America                               | 28,475<br>(19,290 to 38,354)          | 14,194<br>(9,742 to 18,987)           | 14,281<br>(9,693 to 19,338)           | 39<br>(27 to 53)      | 33<br>(22 to 44)      | 48<br>(33 to 65)      |
| Southern Sub-Saharan Africa                          | 40,815<br>(27,344 to 56,358)          | 17,393<br>(11,701 to 23,867)          | 23,421<br>(15,618 to 32,727)          | 88<br>(59 to 121)     | 66<br>(45 to 91)      | 116<br>(78 to 160)    |
| Tropical Latin America                               | 273,909<br>(187,077 to 376,880)       | 114,628<br>(78,748 to 156,305)        | 159,281<br>(108,358 to 220,704)       | 145<br>(99 to 198)    | 111<br>(76 to 151)    | 185<br>(126 to 254)   |
| Western Europe                                       | 542,221<br>(369,725 to 742,222)       | 258,514<br>(176,961 to 350,841)       | 283,707<br>(192,859 to 386,405)       | 72<br>(48 to 98)      | 60<br>(41 to 83)      | 85<br>(57 to 116)     |
| Western Sub-Saharan Africa                           | 135,813<br>(88,567 to 191,105)        | 44,097<br>(29,149 to 61,692)          | 91,716<br>(60,469 to 130,760)         | 84<br>(55 to 117)     | 55<br>(37 to 77)      | 115<br>(75 to 160)    |
| <b>Other cardiovascular and circulatory diseases</b> |                                       |                                       |                                       |                       |                       |                       |
| Global                                               | 6,070,697<br>(4,149,988 to 8,291,725) | 2,904,069<br>(1,985,114 to 3,981,270) | 3,166,627<br>(2,142,626 to 4,323,897) | 89<br>(61 to 121)     | 82<br>(56 to 112)     | 95<br>(65 to 130)     |
| Andean Latin America                                 | 144<br>(131 to 158)                   | 131<br>(113 to 150)                   | 157<br>(137 to 178)                   | 73<br>(49 to 100)     | 50<br>(34 to 69)      | 96<br>(63 to 131)     |
| Australasia                                          | 81<br>(76 to 86)                      | 71<br>(65 to 78)                      | 92<br>(84 to 100)                     | 57<br>(39 to 78)      | 56<br>(38 to 76)      | 58<br>(40 to 80)      |
| Caribbean                                            | 211<br>(192 to 235)                   | 208<br>(179 to 244)                   | 215<br>(195 to 241)                   | 82<br>(56 to 113)     | 63<br>(43 to 86)      | 103<br>(69 to 141)    |
| Central Asia                                         | 122<br>(112 to 134)                   | 78<br>(69 to 87)                      | 176<br>(156 to 197)                   | 21<br>(15 to 30)      | 15<br>(10 to 21)      | 29<br>(20 to 41)      |
| Central Europe                                       | 189<br>(182 to 195)                   | 131<br>(126 to 136)                   | 259<br>(248 to 270)                   | 97<br>(66 to 133)     | 78<br>(53 to 107)     | 119<br>(81 to 163)    |
| Central Latin America                                | 115<br>(111 to 119)                   | 106<br>(101 to 111)                   | 124<br>(119 to 130)                   | 100<br>(68 to 138)    | 93<br>(63 to 127)     | 108<br>(73 to 147)    |
| Central Sub-Saharan Africa                           | 606<br>(403 to 884)                   | 654<br>(392 to 1,037)                 | 549<br>(347 to 853)                   | 129<br>(83 to 187)    | 148<br>(94 to 222)    | 107<br>(71 to 152)    |
| East Asia                                            | 99<br>(92 to 106)                     | 76<br>(69 to 84)                      | 122<br>(112 to 133)                   | 115<br>(78 to 159)    | 94<br>(64 to 131)     | 133<br>(89 to 184)    |
| Eastern Europe                                       | 123<br>(116 to 131)                   | 90<br>(84 to 98)                      | 166<br>(153 to 181)                   | 17<br>(12 to 24)      | 17<br>(11 to 23)      | 18<br>(12 to 25)      |
| Eastern Sub-Saharan Africa                           | 809<br>(656 to 978)                   | 738<br>(544 to 979)                   | 885<br>(695 to 1,122)                 | 178<br>(116 to 262)   | 225<br>(147 to 323)   | 120<br>(74 to 186)    |
| High-income Asia Pacific                             | 53<br>(51 to 55)                      | 47<br>(45 to 49)                      | 60<br>(57 to 63)                      | 57<br>(39 to 79)      | 49<br>(34 to 68)      | 65<br>(45 to 90)      |
| High-income North America                            | 130<br>(125 to 136)                   | 119<br>(113 to 126)                   | 142<br>(135 to 151)                   | 96<br>(66 to 131)     | 93<br>(64 to 127)     | 101<br>(70 to 139)    |
| North Africa and Middle East                         | 384<br>(360 to 409)                   | 366<br>(333 to 404)                   | 402<br>(370 to 439)                   | 201<br>(137 to 273)   | 180<br>(123 to 247)   | 221<br>(150 to 300)   |
| Oceania                                              | 493<br>(377 to 657)                   | 519<br>(371 to 719)                   | 468<br>(366 to 612)                   | 90<br>(61 to 125)     | 70<br>(48 to 96)      | 111<br>(75 to 153)    |
| South Asia                                           | 39<br>(36 to 42)                      | 33<br>(30 to 38)                      | 44<br>(40 to 50)                      | 4.7<br>(3.3 to 6.5)   | 3.8<br>(2.6 to 5.2)   | 5.8<br>(4.0 to 7.9)   |
| Southeast Asia                                       | 166<br>(149 to 185)                   | 142<br>(123 to 164)                   | 194<br>(169 to 222)                   | 91<br>(62 to 125)     | 85<br>(58 to 117)     | 97<br>(66 to 133)     |
| Southern Latin America                               | 214<br>(203 to 225)                   | 189<br>(177 to 203)                   | 242<br>(225 to 260)                   | 59<br>(39 to 83)      | 61<br>(40 to 88)      | 57<br>(37 to 80)      |
| Southern Sub-Saharan Africa                          | 222<br>(196 to 252)                   | 219<br>(186 to 257)                   | 226<br>(194 to 264)                   | 151<br>(105 to 203)   | 179<br>(124 to 240)   | 103<br>(71 to 138)    |
| Tropical Latin America                               | 206<br>(195 to 218)                   | 186<br>(173 to 201)                   | 229<br>(213 to 247)                   | 154<br>(105 to 209)   | 125<br>(85 to 170)    | 186<br>(126 to 254)   |
| Western Europe                                       | 145<br>(140 to 151)                   | 125<br>(119 to 131)                   | 167<br>(159 to 176)                   | 68<br>(47 to 93)      | 60<br>(41 to 82)      | 76<br>(53 to 105)     |
| Western Sub-Saharan Africa                           | 353<br>(297 to 442)                   | 355<br>(276 to 481)                   | 347<br>(275 to 459)                   | 339<br>(230 to 459)   | 405<br>(274 to 553)   | 267<br>(182 to 363)   |
| <b>Peripheral artery disease</b>                     |                                       |                                       |                                       |                       |                       |                       |
| Global                                               | 572,829<br>(272,090 to 1,056,179)     | 309,381<br>(146,230 to 572,188)       | 263,448<br>(125,664 to 486,823)       | 9.2<br>(4.3 to 16.9)  | 9.0<br>(4.3 to 16.8)  | 9.3<br>(4.4 to 17.1)  |
| Andean Latin America                                 | 1,837<br>(839 to 3,475)               | 965<br>(440 to 1,841)                 | 872<br>(397 to 1,634)                 | 4.6<br>(2.1 to 8.7)   | 4.5<br>(2.0 to 8.6)   | 4.7<br>(2.2 to 8.9)   |
| Australasia                                          | 4,372<br>(2,021 to 8,255)             | 2,044<br>(945 to 3,896)               | 2,328<br>(1,048 to 4,319)             | 10.9<br>(5.0 to 20.4) | 9.4<br>(4.3 to 17.8)  | 12.4<br>(5.6 to 23.1) |
| Caribbean                                            | 1,829<br>(840 to 3,472)               | 964<br>(436 to 1,803)                 | 865<br>(397 to 1,627)                 | 4.4<br>(2.0 to 8.3)   | 4.2<br>(1.9 to 7.9)   | 4.5<br>(2.1 to 8.5)   |
| Central Asia                                         | 5,150<br>(2,317 to 9,676)             | 3,017<br>(1,370 to 5,804)             | 2,133<br>(971 to 4,045)               | 9.5<br>(4.3 to 18.0)  | 9.3<br>(4.3 to 18.1)  | 9.6<br>(4.4 to 18.1)  |
| Central Europe                                       | 19,814<br>(9,101 to 37,661)           | 11,772<br>(5,449 to 22,702)           | 8,042<br>(3,725 to 14,957)            | 10.4<br>(4.8 to 19.8) | 10.3<br>(4.8 to 19.9) | 10.5<br>(4.8 to 19.6) |
| Central Latin America                                | 7,723<br>(3,633 to 14,270)            | 4,123<br>(1,948 to 7,555)             | 3,601<br>(1,686 to 6,637)             | 4.6<br>(2.2 to 8.5)   | 4.5<br>(2.1 to 8.3)   | 4.7<br>(2.2 to 8.7)   |
| Central Sub-Saharan Africa                           | 2,831<br>(1,288 to 5,251)             | 1,531<br>(703 to 2,905)               | 1,300<br>(591 to 2,426)               | 8.2<br>(3.8 to 15.5)  | 8.1<br>(3.7 to 15.5)  | 8.3<br>(3.8 to 15.2)  |
| East Asia                                            | 143,225<br>(68,744 to 265,548)        | 75,013<br>(35,667 to 139,377)         | 68,212<br>(32,705 to 124,072)         | 10.1<br>(4.8 to 18.6) | 10.2<br>(4.8 to 18.8) | 9.9<br>(4.7 to 18.2)  |



|                              |                               |                              |                              |                       |                       |                       |
|------------------------------|-------------------------------|------------------------------|------------------------------|-----------------------|-----------------------|-----------------------|
| Eastern Europe               | 30,873<br>(14,162 to 58,765)  | 20,516<br>(9,458 to 39,553)  | 10,357<br>(4,614 to 19,524)  | 9.4<br>(4.3 to 17.9)  | 9.3<br>(4.3 to 18.0)  | 9.4<br>(4.2 to 17.9)  |
| Eastern Sub-Saharan Africa   | 12,161<br>(5,619 to 22,838)   | 6,306<br>(2,927 to 12,053)   | 5,855<br>(2,696 to 10,805)   | 10.2<br>(4.7 to 19.3) | 9.7<br>(4.5 to 18.5)  | 10.8<br>(4.9 to 20.1) |
| High-income Asia Pacific     | 33,829<br>(16,096 to 63,452)  | 19,506<br>(9,131 to 36,307)  | 14,324<br>(6,842 to 27,094)  | 8.6<br>(4.1 to 16.1)  | 8.6<br>(4.0 to 15.9)  | 8.5<br>(4.1 to 16.1)  |
| High-income North America    | 54,324<br>(26,982 to 99,754)  | 27,726<br>(13,725 to 51,152) | 26,598<br>(13,334 to 47,931) | 10.6<br>(5.2 to 19.4) | 9.6<br>(4.8 to 17.8)  | 11.6<br>(5.8 to 21.0) |
| North Africa and Middle East | 26,163<br>(11,961 to 48,613)  | 13,496<br>(6,169 to 26,247)  | 12,667<br>(5,789 to 23,657)  | 9.1<br>(4.2 to 17.2)  | 8.8<br>(4.1 to 17.0)  | 9.4<br>(4.3 to 17.7)  |
| Oceania                      | 456<br>(208 to 832)           | 246<br>(114 to 456)          | 210<br>(97 to 389)           | 10.3<br>(4.8 to 18.9) | 10.2<br>(4.7 to 18.8) | 10.4<br>(4.8 to 19.1) |
| South Asia                   | 75,183<br>(35,185 to 139,639) | 38,122<br>(18,003 to 70,799) | 37,061<br>(17,355 to 68,903) | 7.9<br>(3.7 to 14.6)  | 7.8<br>(3.7 to 14.3)  | 8.0<br>(3.8 to 15.0)  |
| Southeast Asia               | 52,972<br>(24,294 to 97,402)  | 29,354<br>(13,531 to 54,595) | 23,619<br>(10,946 to 43,973) | 12.7<br>(5.8 to 23.8) | 12.6<br>(5.8 to 23.3) | 12.8<br>(5.9 to 23.7) |
| Southern Latin America       | 6,881<br>(3,174 to 12,843)    | 3,852<br>(1,753 to 7,062)    | 3,029<br>(1,397 to 5,620)    | 9.6<br>(4.4 to 18.0)  | 9.0<br>(4.1 to 17.0)  | 10.3<br>(4.7 to 19.2) |
| Southern Sub-Saharan Africa  | 5,127<br>(2,413 to 9,433)     | 2,987<br>(1,425 to 5,492)    | 2,139<br>(1,019 to 3,971)    | 13.1<br>(6.2 to 24.1) | 12.7<br>(6.0 to 23.4) | 13.7<br>(6.4 to 25.6) |
| Tropical Latin America       | 10,468<br>(4,956 to 19,385)   | 5,880<br>(2,750 to 10,824)   | 4,588<br>(2,185 to 8,560)    | 6.1<br>(2.9 to 11.3)  | 6.0<br>(2.8 to 11.2)  | 6.2<br>(2.9 to 11.4)  |
| Western Europe               | 65,721<br>(30,247 to 121,459) | 36,044<br>(16,600 to 67,147) | 29,678<br>(13,817 to 54,999) | 8.2<br>(3.8 to 15.1)  | 7.9<br>(3.6 to 14.7)  | 8.5<br>(4.0 to 15.5)  |
| Western Sub-Saharan Africa   | 11,889<br>(5,426 to 22,427)   | 5,917<br>(2,693 to 11,221)   | 5,972<br>(2,733 to 11,116)   | 10.3<br>(4.7 to 19.5) | 9.7<br>(4.5 to 18.5)  | 11.0<br>(5.0 to 20.6) |

**eTable 3a. Prevalent Cases of Cardiovascular Causes for Years 1990-2000 with Upper and Lower Uncertainty Bounds**

|                                               | 1990                                           |                                                |                                                | 1995                                            |                                                |                                                | 2000                                             |                                                |                                                |
|-----------------------------------------------|------------------------------------------------|------------------------------------------------|------------------------------------------------|-------------------------------------------------|------------------------------------------------|------------------------------------------------|--------------------------------------------------|------------------------------------------------|------------------------------------------------|
|                                               | Both                                           | Female                                         | Male                                           | Both                                            | Female                                         | Male                                           | Both                                             | Female                                         | Male                                           |
| <b>Global</b>                                 |                                                |                                                |                                                |                                                 |                                                |                                                |                                                  |                                                |                                                |
| Atrial fibrillation and flutter               | 18,306,523.6<br>(16,333,861.3 to 20,612,184.1) | 8,158,848.4<br>(7,213,772.1 to 9,255,376.1)    | 10,147,675.4<br>(9,023,327.1 to 11,410,687.0)  | 20,109,829.6<br>(17,972,993.1 to 22,583,065.9)  | 8,898,973.5<br>(7,956,377.0 to 10,016,613.5)   | 11,210,856.9<br>(9,986,521.5 to 12,572,269.6)  | 22,654,056.7<br>(20,402,018.6 to 25,283,350.5)   | 9,950,661.8<br>(8,925,936.3 to 11,148,010.3)   | 12,703,394.5<br>(11,403,246.3 to 14,195,003.6) |
| Cardiomyopathy and myocarditis                | 1,486,813.9<br>(1,416,292.0 to 1,558,092.0)    | 795,463.9<br>(755,198.4 to 834,365.3)          | 691,350.0<br>(658,317.6 to 726,362.1)          | 1,626,750.2<br>(1,549,698.4 to 1,699,801.9)     | 877,982.5<br>(833,908.6 to 919,264.6)          | 748,767.8<br>(712,037.7 to 785,399.0)          | 1,796,594.4<br>(1,710,814.3 to 1,877,343.4)      | 966,009.0<br>(917,771.5 to 1,012,432.4)        | 830,585.4<br>(790,916.9 to 871,607.6)          |
| Endocarditis                                  | 70,896.2<br>(66,466.6 to 76,197.5)             | 52,522.6<br>(49,213.5 to 56,493.2)             | 18,373.6<br>(17,033.5 to 19,887.7)             | 78,837.8<br>(74,186.5 to 84,249.7)              | 58,263.4<br>(54,875.4 to 62,157.3)             | 20,574.5<br>(19,139.5 to 22,242.6)             | 85,700.2<br>(80,543.2 to 91,497.0)               | 63,116.2<br>(59,365.5 to 67,356.4)             | 22,584.0<br>(21,011.5 to 24,371.9)             |
| Hemorrhagic and other stroke                  | 11,979,011.4<br>(11,708,997.2 to 12,282,796.8) | 6,037,032.7<br>(5,898,188.2 to 6,195,624.8)    | 5,941,978.7<br>(5,805,758.2 to 6,096,621.0)    | 13,362,158.6<br>(13,081,655.5 to 13,666,935.1)  | 6,666,962.2<br>(6,528,639.3 to 6,819,070.4)    | 6,695,196.9<br>(6,552,193.3 to 6,855,543.6)    | 14,623,804.5<br>(14,316,630.9 to 14,964,973.3)   | 7,221,754.4<br>(7,069,739.4 to 7,383,947.7)    | 7,402,050.0<br>(7,245,062.5 to 7,581,592.2)    |
| Hypertensive heart disease                    | 2,817,450.0<br>(2,646,882.4 to 2,988,502.8)    | 1,596,626.0<br>(1,497,435.8 to 1,694,434.8)    | 1,220,824.0<br>(1,148,244.7 to 1,294,319.3)    | 3,239,274.3<br>(3,048,481.9 to 3,427,595.8)     | 1,835,747.6<br>(1,727,290.5 to 1,943,328.5)    | 1,403,526.9<br>(1,319,743.1 to 1,485,505.9)    | 3,778,742.5<br>(3,552,599.4 to 4,002,184.1)      | 2,136,191.1<br>(2,006,179.4 to 2,261,441.1)    | 1,642,551.3<br>(1,547,710.7 to 1,740,299.2)    |
| Ischemic heart disease                        | 63,806,340.4<br>(58,303,508.1 to 70,233,654.3) | 27,178,072.6<br>(24,886,003.0 to 29,923,255.1) | 36,628,268.2<br>(33,451,192.0 to 40,356,791.8) | 70,345,817.9<br>(64,413,003.5 to 77,379,782.7)  | 29,720,085.8<br>(27,207,227.9 to 32,683,172.8) | 40,625,734.7<br>(37,172,291.0 to 44,669,179.0) | 78,107,980.6<br>(71,552,691.9 to 85,844,870.2)   | 32,830,407.6<br>(30,172,608.6 to 35,981,757.3) | 45,277,571.7<br>(41,384,645.6 to 49,636,625.7) |
| Ischemic stroke                               | 15,556,614.7<br>(15,196,647.7 to 15,962,819.1) | 7,654,364.2<br>(7,477,839.8 to 7,858,608.9)    | 7,902,250.6<br>(7,707,554.8 to 8,116,855.9)    | 17,286,526.7<br>(16,915,820.0 to 17,703,810.6)  | 8,416,352.0<br>(8,240,062.3 to 8,609,023.5)    | 8,870,175.3<br>(8,669,600.5 to 9,092,604.5)    | 18,893,146.5<br>(18,476,815.3 to 19,359,444.3)   | 9,135,018.1<br>(8,934,001.4 to 9,355,625.7)    | 9,758,128.2<br>(9,535,725.6 to 10,004,509.7)   |
| Other cardiovascular and circulatory diseases | 55,546,972.4<br>(51,620,912.2 to 60,088,660.9) | 25,170,966.4<br>(23,326,696.3 to 27,391,445.1) | 30,376,006.2<br>(27,521,698.3 to 33,638,001.7) | 61,629,586.0<br>(57,249,065.3 to 66,504,063.9)  | 27,952,563.4<br>(25,979,128.1 to 30,319,895.3) | 33,677,025.0<br>(30,511,042.2 to 37,285,024.3) | 66,821,099.7<br>(62,397,472.4 to 71,767,804.7)   | 31,020,920.5<br>(29,012,674.9 to 33,470,177.4) | 35,800,178.8<br>(32,707,024.9 to 39,445,852.4) |
| Peripheral artery disease                     | 79,862,464.7<br>(69,985,759.2 to 91,806,610.4) | 43,057,757.5<br>(37,865,954.0 to 49,321,127.7) | 36,804,708.1<br>(32,079,495.3 to 42,455,444.5) | 89,484,901.3<br>(78,776,520.9 to 102,346,987.8) | 48,048,840.4<br>(42,440,852.5 to 54,867,357.4) | 41,436,064.0<br>(36,326,642.0 to 47,600,295.5) | 100,465,797.4<br>(88,286,961.1 to 114,852,864.0) | 53,732,913.0<br>(47,361,126.7 to 61,312,893.3) | 46,732,883.1<br>(40,935,949.4 to 53,572,060.0) |
| <b>Central Asia</b>                           |                                                |                                                |                                                |                                                 |                                                |                                                |                                                  |                                                |                                                |
| Atrial fibrillation and flutter               | 248,692.7<br>(216,238.7 to 283,683.8)          | 121,987.6<br>(104,787.0 to 142,678.9)          | 126,705.1<br>(109,186.7 to 145,435.7)          | 265,877.2<br>(231,222.7 to 305,010.2)           | 128,036.7<br>(109,402.2 to 149,147.4)          | 137,840.5<br>(118,464.5 to 158,154.7)          | 281,842.5<br>(244,195.1 to 323,112.4)            | 134,066.9<br>(115,297.6 to 156,376.5)          | 147,775.7<br>(128,059.5 to 169,623.3)          |
| Cardiomyopathy and myocarditis                | 7,793.3<br>(7,303.5 to 8,309.2)                | 3,771.9<br>(3,527.7 to 4,016.9)                | 4,021.3<br>(3,765.2 to 4,312.5)                | 8,088.4<br>(7,607.9 to 8,609.5)                 | 4,184.3<br>(3,664.5 to 4,162.6)                | 3,907.2<br>(3,909.7 to 4,478.9)                | 8,077.2<br>(7,575.3 to 8,592.5)                  | 4,307.2<br>(3,535.2 to 4,003.9)                | 4,307.2<br>(4,024.3 to 4,618.4)                |
| Endocarditis                                  | 400.9<br>(382.8 to 418.7)                      | 221.6<br>(211.6 to 232.2)                      | 179.2<br>(171.5 to 186.8)                      | 427.5<br>(411.5 to 442.3)                       | 233.9<br>(224.5 to 242.8)                      | 193.6<br>(186.6 to 200.6)                      | 456.2<br>(438.9 to 472.7)                        | 210.6<br>(235.5 to 255.0)                      | 210.6<br>(203.3 to 217.5)                      |
| Hemorrhagic and other stroke                  | 205,236.7<br>(200,967.5 to 209,737.7)          | 117,089.1<br>(114,540.6 to 119,656.2)          | 88,147.6<br>(86,174.1 to 90,144.5)             | 216,233.5<br>(212,078.4 to 220,570.9)           | 121,111.4<br>(118,806.0 to 123,598.4)          | 95,122.1<br>(93,253.0 to 97,211.7)             | 228,958.5<br>(224,748.4 to 233,636.9)            | 126,634.5<br>(124,241.5 to 129,115.1)          | 102,324.0<br>(100,274.6 to 104,508.5)          |
| Hypertensive heart disease                    | 21,676.3<br>(19,804.4 to 23,548.6)             | 13,927.3<br>(12,668.6 to 15,131.4)             | 7,749.1<br>(7,050.7 to 8,487.0)                | 23,232.7<br>(21,211.4 to 25,442.7)              | 14,749.3<br>(13,429.8 to 16,132.3)             | 8,483.4<br>(7,697.3 to 9,323.1)                | 24,990.2<br>(22,835.3 to 27,492.8)               | 15,232.2<br>(14,223.1 to 17,209.8)             | 9,362.0<br>(8,468.6 to 10,334.7)               |
| Ischemic heart disease                        | 1,340,359.4<br>(1,221,879.6 to 1,465,622.5)    | 691,597.4<br>(626,900.0 to 762,056.6)          | 648,762.1<br>(590,226.3 to 711,571.4)          | 1,454,356.3<br>(1,328,809.8 to 1,558,368.5)     | 727,011.7<br>(660,494.5 to 802,773.2)          | 727,344.5<br>(665,744.6 to 793,230.7)          | 1,520,052.1<br>(1,397,294.0 to 1,657,280.7)      | 749,048.9<br>(683,029.8 to 824,116.4)          | 771,003.2<br>(708,506.5 to 842,918.8)          |
| Ischemic stroke                               | 253,271.3<br>(247,482.8 to 259,069.2)          | 146,083.7<br>(142,660.1 to 149,657.4)          | 107,187.6<br>(104,587.3 to 109,638.9)          | 266,654.8<br>(260,878.5 to 272,530.9)           | 148,789.5<br>(145,370.4 to 152,057.1)          | 117,865.3<br>(115,287.9 to 120,655.6)          | 277,720.0<br>(271,547.6 to 283,973.5)            | 151,352.0<br>(147,997.8 to 154,833.2)          | 126,367.9<br>(123,357.7 to 129,434.5)          |
| Other cardiovascular and circulatory diseases | 156,115.5<br>(143,795.9 to 168,230.8)          | 61,403.9<br>(56,155.7 to 66,705.0)             | 94,711.5<br>(86,082.1 to 103,504.8)            | 161,528.9<br>(148,865.3 to 175,537.9)           | 62,763.4<br>(57,737.7 to 68,198.8)             | 98,765.5<br>(89,917.1 to 107,866.7)            | 164,868.9<br>(151,936.8 to 178,942.5)            | 63,892.1<br>(58,531.6 to 69,247.4)             | 100,976.8<br>(92,054.9 to 110,338.3)           |
| Peripheral artery disease                     | 1,074,952.6<br>(942,114.5 to 1,239,965.3)      | 639,140.2<br>(558,725.6 to 734,689.7)          | 435,812.4<br>(380,240.4 to 505,842.6)          | 1,146,009.2<br>(1,000,362.5 to 1,328,075.5)     | 667,702.8<br>(584,062.7 to 767,630.4)          | 478,306.4<br>(417,632.5 to 556,408.2)          | 1,190,537.5<br>(1,038,937.2 to 1,376,355.8)      | 680,939.2<br>(594,343.7 to 787,213.1)          | 509,598.3<br>(443,671.5 to 590,475.5)          |
| <b>Eastern Europe</b>                         |                                                |                                                |                                                |                                                 |                                                |                                                |                                                  |                                                |                                                |
| Atrial fibrillation and flutter               | 1,471,580.1<br>(1,282,424.1 to 1,695,006.8)    | 811,853.4<br>(694,663.7 to 956,244.7)          | 659,726.8<br>(565,802.5 to 766,206.8)          | 1,535,300.1<br>(1,330,304.7 to 1,761,313.3)     | 835,227.5<br>(713,670.7 to 971,565.8)          | 700,077.6<br>(601,673.6 to 811,391.6)          | 1,596,380.6<br>(1,383,546.9 to 1,838,215.9)      | 863,042.3<br>(733,816.0 to 1,006,016.9)        | 733,338.2<br>(630,579.7 to 852,005.2)          |
| Cardiomyopathy and myocarditis                | 79,836.5<br>(73,202.9 to 86,624.0)             | 39,542.0<br>(36,029.0 to 43,094.2)             | 40,294.6<br>(36,381.1 to 44,646.5)             | 81,242.4<br>(75,115.2 to 87,663.1)              | 42,029.5<br>(38,709.5 to 45,484.3)             | 39,212.9<br>(35,772.2 to 42,970.9)             | 84,065.5<br>(77,168.3 to 91,085.3)               | 42,191.8<br>(38,678.4 to 45,876.3)             | 41,873.7<br>(37,823.6 to 46,159.3)             |
| Endocarditis                                  | 1,676.8<br>(1,591.1 to 1,768.0)                | 1,029.0<br>(968.0 to 1,099.1)                  | 647.8<br>(617.1 to 678.0)                      | 1,739.0<br>(1,659.8 to 1,821.8)                 | 1,046.7<br>(990.9 to 1,106.5)                  | 692.4<br>(662.3 to 721.1)                      | 1,854.6<br>(1,775.4 to 1,934.9)                  | 1,090.4<br>(1,035.3 to 1,146.2)                | 764.2<br>(729.6 to 795.2)                      |
| Hemorrhagic and other stroke                  | 950,867.0<br>(928,818.3 to 973,004.4)          | 591,616.5<br>(576,846.4 to 606,900.8)          | 359,250.6<br>(349,630.3 to 368,176.8)          | 1,009,976.4<br>(987,785.9 to 1,033,288.6)       | 614,755.9<br>(600,516.9 to 628,882.2)          | 395,220.5<br>(384,870.5 to 406,120.0)          | 1,094,936.2<br>(1,068,950.1 to 1,120,045.6)      | 657,855.9<br>(642,125.6 to 674,135.1)          | 437,080.3<br>(424,532.8 to 448,322.1)          |
| Hypertensive heart disease                    | 69,112.5<br>(62,040.5 to 76,640.0)             | 52,180.3<br>(46,661.5 to 58,437.2)             | 16,932.2<br>(15,102.0 to 19,011.8)             | 71,603.0<br>(64,654.0 to 79,063.2)              | 54,968.4<br>(49,140.3 to 61,219.2)             | 16,634.6<br>(14,883.4 to 18,556.1)             | 74,372.0<br>(66,567.7 to 82,834.4)               | 56,648.5<br>(50,316.7 to 63,536.4)             | 17,723.5<br>(15,734.0 to 20,066.9)             |
| Ischemic heart disease                        | 11,178,685.4<br>(10,297,033.9 to 12,129,848.3) | 5,283,843.9<br>(4,806,776.0 to 5,756,784.1)    | 5,894,842.9<br>(5,385,227.0 to 6,453,150.6)    | 11,617,668.3<br>(10,722,056.3 to 12,643,313.8)  | 5,364,062.5<br>(4,920,353.6 to 5,861,553.5)    | 6,253,603.6<br>(5,702,177.8 to 6,907,014.3)    | 11,846,932.1<br>(10,949,689.4 to 12,824,514.6)   | 5,426,336.6<br>(4,962,377.2 to 5,915,045.9)    | 6,420,595.5<br>(5,885,457.9 to 7,032,918.4)    |
| Ischemic stroke                               | 1,683,081.6<br>(1,636,598.2 to 1,728,797.3)    | 1,077,721.5<br>(1,046,316.9 to 1,110,790.0)    | 605,360.2<br>(586,392.0 to 622,524.4)          | 1,779,207.2<br>(1,734,318.2 to 1,825,361.8)     | 1,109,360.5<br>(1,080,568.5 to 1,138,435.3)    | 669,846.7<br>(649,646.2 to 691,531.3)          | 1,841,014.4<br>(1,792,071.1 to 1,889,758.4)      | 1,136,643.1<br>(1,105,730.1 to 1,168,616.6)    | 704,371.3<br>(680,717.3 to 726,662.9)          |
| Other cardiovascular and circulatory diseases | 648,604.4<br>(580,199.3 to 725,191.2)          | 390,714.8<br>(349,126.1 to 436,507.9)          | 257,889.6<br>(227,302.3 to 294,218.4)          | 649,061.6<br>(584,397.5 to 718,124.9)           | 404,823.5<br>(362,464.2 to 447,903.5)          | 244,232.8<br>(215,211.6 to 276,146.2)          | 690,778.6<br>(616,354.6 to 772,063.1)            | 426,220.8<br>(378,526.8 to 477,323.1)          | 264,557.8<br>(234,275.5 to 299,732.9)          |
| Peripheral artery disease                     | 6,785,364.2<br>(5,926,328.6 to 7,804,919.5)    | 4,464,032.1<br>(3,915,566.8 to 5,135,047.7)    | 2,321,332.6<br>(2,009,610.1 to 2,688,843.9)    | 7,131,137.6<br>(6,220,557.7 to 8,217,312.7)     | 4,581,912.1<br>(3,985,245.1 to 5,308,927.7)    | 2,549,225.7<br>(2,220,301.7 to 2,972,750.9)    | 7,209,914.6<br>(6,275,566.1 to 8,202,520.3)      | 4,620,713.2<br>(4,028,004.1 to 5,330,003.5)    | 2,589,201.4<br>(2,249,165.2 to 3,003,750.5)    |
| <b>Central Europe</b>                         |                                                |                                                |                                                |                                                 |                                                |                                                |                                                  |                                                |                                                |
| Atrial fibrillation and flutter               | 907,786.0<br>(786,249.9 to 1,044,252.7)        | 448,554.0<br>(383,958.6 to 522,081.6)          | 459,232.0<br>(396,640.9 to 536,626.5)          | 1,023,090.1<br>(922,660.8 to 1,134,990.6)       | 515,299.0<br>(458,716.9 to 577,287.6)          | 507,791.1<br>(460,601.7 to 559,289.9)          | 1,096,860.3<br>(1,008,374.6 to 1,198,533.5)      | 553,864.9<br>(503,154.0 to 613,553.0)          | 542,995.4<br>(500,916.2 to 589,464.9)          |
| Cardiomyopathy and myocarditis                | 54,440.7<br>(50,861.2 to 58,137.1)             | 28,539.7<br>(26,432.5 to 30,704.3)             | 25,900.9<br>(24,238.1 to 27,737.7)             | 59,790.4<br>(55,887.5 to 63,771.5)              | 32,711.9<br>(30,408.3 to 35,014.1)             | 27,078.5<br>(25,263.3 to 28,912.9)             | 60,853.1<br>(56,856.4 to 64,853.1)               | 33,021.5<br>(30,719.8 to 35,356.2)             | 27,831.6<br>(25,926.5 to 29,677.0)             |
| Endocarditis                                  | 1,007.0<br>(957.7 to 1,053.5)                  | 345.0<br>(321.8 to 369.7)                      | 662.0<br>(631.2 to 691.4)                      | 984.7<br>(943.1 to 1,023.4)                     | 348.8<br>(329.3 to 369.6)                      | 635.9<br>(609.8 to 660.8)                      | 990.2<br>(951.6 to 1,029.3)                      | 322.9<br>(304.5 to 341.5)                      | 667.3<br>(639.5 to 694.6)                      |
| Hemorrhagic and other stroke                  | 443,976.8<br>(434,514.1 to 454,436.8)          | 254,422.4<br>(249,343.1 to 260,163.9)          | 189,554.4<br>(184,872.8 to 194,293.7)          | 461,813.9<br>(452,833.4 to 471,251.5)           | 263,073.9<br>(257,897.9 to 268,199.1)          | 198,740.0<br>(194,389.4 to 203,168.9)          | 479,799.7<br>(469,838.2 to 490,220.9)            | 273,750.8<br>(268,072.5 to 279,951.4)          | 206,048.9<br>(201,374.0 to 210,923.1)          |
| Hypertensive heart disease                    | 79,713.9<br>(72,375.9 to 86,979.9)             | 51,315.3<br>(46,333.5 to 56,305.7)             | 28,398.6<br>(25,837.1 to 30,992.9)             | 89,263.5<br>(81,720.6 to 97,215.2)              | 59,306.4<br>(54,216.4 to 64,675.8)             | 29,957.0<br>(27,274.8 to 32,664.3)             | 95,899.0<br>(87,102.7 to 104,558.4)              | 64,481.5<br>(58,460.3 to 70,369.9)             | 31,417.5<br>(28,658.9 to 34,435.4)             |
| Ischemic heart disease                        | 4,275,036.5<br>(3,889,440.8 to 4,712,429.0)    | 1,784,946.6<br>(1,617,948.6 to 1,977,888.9)    | 2,490,089.9<br>(2,256,675.3 to 2,746,926.4)    | 4,2                                             |                                                |                                                |                                                  |                                                |                                                |



|                                               |                                             |                                             |                                             |                                             |                                             |                                             |                                             |                                             |                                             |
|-----------------------------------------------|---------------------------------------------|---------------------------------------------|---------------------------------------------|---------------------------------------------|---------------------------------------------|---------------------------------------------|---------------------------------------------|---------------------------------------------|---------------------------------------------|
| Other cardiovascular and circulatory diseases | 1,910,905.9<br>(1,789,940.5 to 2,051,049.7) | 901,662.8<br>(844,547.8 to 970,230.0)       | 1,009,243.2<br>(940,542.6 to 1,086,906.4)   | 2,048,465.6<br>(1,916,993.6 to 2,199,166.1) | 980,601.6<br>(920,216.7 to 1,049,292.9)     | 1,067,864.0<br>(994,294.2 to 1,147,203.3)   | 2,228,603.4<br>(2,084,138.3 to 2,391,198.4) | 1,076,131.7<br>(1,007,355.2 to 1,152,604.8) | 1,152,471.7<br>(1,072,119.5 to 1,242,943.4) |
| Peripheral artery disease                     | 3,242,272.5<br>(2,849,888.2 to 3,716,612.8) | 1,830,029.6<br>(1,616,233.7 to 2,091,285.5) | 1,412,243.0<br>(1,235,903.1 to 1,627,017.1) | 3,714,547.0<br>(3,265,397.4 to 4,246,211.6) | 2,132,840.0<br>(1,882,630.1 to 2,436,451.7) | 1,581,707.0<br>(1,382,588.0 to 1,819,247.2) | 4,388,953.5<br>(3,863,190.8 to 5,024,906.8) | 2,545,975.2<br>(2,246,123.8 to 2,893,857.9) | 1,842,978.2<br>(1,612,135.1 to 2,127,001.1) |
| <b>Australasia</b>                            |                                             |                                             |                                             |                                             |                                             |                                             |                                             |                                             |                                             |
| Atrial fibrillation and flutter               | 132,923.7<br>(119,445.4 to 148,238.6)       | 53,086.8<br>(48,024.9 to 59,102.9)          | 79,836.9<br>(70,838.6 to 89,877.9)          | 144,480.0<br>(131,312.7 to 160,084.4)       | 56,495.9<br>(51,152.0 to 62,888.5)          | 87,984.0<br>(79,273.0 to 97,859.8)          | 165,959.7<br>(150,509.4 to 184,115.4)       | 64,578.9<br>(58,493.2 to 71,884.6)          | 101,380.8<br>(91,447.7 to 113,635.7)        |
| Cardiomyopathy and myocarditis                | 12,988.6<br>(12,131.8 to 13,853.9)          | 6,108.6<br>(6,346.1 to 7,429.0)             | 6,108.6<br>(5,680.5 to 6,573.5)             | 14,852.1<br>(13,845.6 to 15,905.9)          | 8,065.4<br>(7,415.5 to 8,741.8)             | 6,786.6<br>(6,300.4 to 7,293.5)             | 16,507.6<br>(15,350.1 to 17,656.8)          | 9,018.9<br>(8,267.5 to 9,825.9)             | 7,488.7<br>(6,978.5 to 8,071.6)             |
| Endocarditis                                  | 490.1<br>(470.5 to 510.1)                   | 246.4<br>(235.0 to 259.4)                   | 243.7<br>(233.9 to 253.1)                   | 511.0<br>(492.4 to 529.3)                   | 259.0<br>(247.8 to 270.5)                   | 259.0<br>(243.3 to 261.1)                   | 514.3<br>(495.8 to 532.9)                   | 258.9<br>(247.8 to 270.4)                   | 253.3<br>(246.0 to 264.2)                   |
| Hemorrhagic and other stroke                  | 31,513.7<br>(30,865.2 to 32,267.4)          | 17,316.7<br>(16,914.9 to 17,747.1)          | 14,197.0<br>(13,842.2 to 14,597.7)          | 34,596.7<br>(33,922.1 to 35,365.4)          | 19,011.5<br>(18,610.3 to 19,448.2)          | 15,585.3<br>(15,210.2 to 15,972.2)          | 37,423.1<br>(36,594.1 to 38,369.2)          | 20,494.8<br>(20,005.3 to 21,036.6)          | 16,928.3<br>(16,505.1 to 17,411.1)          |
| Hypertensive heart disease                    | 8,811.7<br>(8,032.1 to 9,676.5)             | 4,548.4<br>(4,458.4 to 5,469.1)             | 3,877.0<br>(3,503.7 to 4,301.2)             | 9,642.5<br>(8,772.1 to 10,567.2)            | 5,166.0<br>(4,663.5 to 5,679.8)             | 4,476.5<br>(4,043.8 to 4,941.7)             | 10,990.3<br>(10,046.7 to 12,073.2)          | 5,826.3<br>(5,273.8 to 6,449.3)             | 5,164.0<br>(4,670.6 to 5,682.9)             |
| Ischemic heart disease                        | 301,175.4<br>(282,765.7 to 320,947.3)       | 116,103.3<br>(109,126.7 to 123,677.0)       | 185,072.1<br>(172,684.8 to 198,725.0)       | 307,244.2<br>(291,443.1 to 323,719.9)       | 120,038.0<br>(112,731.3 to 127,644.9)       | 187,206.3<br>(177,018.2 to 198,079.5)       | 328,865.7<br>(311,737.6 to 347,230.5)       | 127,879.7<br>(120,431.6 to 136,147.6)       | 200,986.0<br>(189,393.1 to 213,119.5)       |
| Ischemic stroke                               | 63,642.4<br>(62,243.0 to 65,325.2)          | 32,055.2<br>(31,243.3 to 32,895.0)          | 31,587.2<br>(30,781.3 to 32,518.4)          | 70,521.4<br>(69,086.2 to 72,180.1)          | 35,410.7<br>(34,625.2 to 36,283.7)          | 35,110.6<br>(34,251.2 to 36,050.8)          | 75,847.6<br>(74,109.3 to 77,867.1)          | 37,968.7<br>(37,015.1 to 39,019.3)          | 37,879.0<br>(36,900.3 to 38,963.8)          |
| Other cardiovascular and circulatory diseases | 195,325.1<br>(179,427.0 to 212,627.1)       | 104,634.4<br>(96,129.8 to 113,780.4)        | 90,690.7<br>(82,667.4 to 99,959.2)          | 216,403.2<br>(199,020.9 to 234,961.5)       | 116,147.0<br>(106,562.9 to 127,197.3)       | 100,256.1<br>(91,380.2 to 110,292.0)        | 243,720.9<br>(223,840.7 to 265,590.7)       | 129,734.1<br>(118,188.3 to 140,959.2)       | 113,986.8<br>(103,356.5 to 125,443.7)       |
| Peripheral artery disease                     | 489,928.0<br>(428,448.0 to 562,300.5)       | 239,138.1<br>(209,500.2 to 273,799.4)       | 250,790.0<br>(217,937.5 to 290,833.0)       | 540,041.7<br>(477,863.2 to 615,242.7)       | 269,549.0<br>(236,248.0 to 308,752.0)       | 270,492.7<br>(238,810.1 to 308,625.9)       | 617,278.0<br>(547,810.4 to 703,145.1)       | 305,601.2<br>(269,117.4 to 348,310.5)       | 311,676.8<br>(276,366.9 to 358,051.4)       |
| <b>Southern Latin America</b>                 |                                             |                                             |                                             |                                             |                                             |                                             |                                             |                                             |                                             |
| Atrial fibrillation and flutter               | 209,883.5<br>(181,915.7 to 241,680.4)       | 72,222.2<br>(62,294.9 to 84,200.5)          | 137,661.3<br>(119,082.9 to 158,928.1)       | 235,320.6<br>(204,840.0 to 271,386.4)       | 82,114.2<br>(70,966.6 to 96,548.8)          | 153,206.3<br>(133,086.8 to 176,421.4)       | 263,775.3<br>(230,200.3 to 303,816.5)       | 94,784.2<br>(82,208.5 to 109,996.3)         | 168,991.1<br>(147,205.5 to 194,758.6)       |
| Cardiomyopathy and myocarditis                | 17,022.2<br>(14,312.9 to 20,166.9)          | 10,976.3<br>(9,207.7 to 12,840.8)           | 6,046.0<br>(4,982.1 to 7,426.4)             | 19,929.8<br>(16,845.9 to 23,467.7)          | 13,156.2<br>(11,043.0 to 15,245.1)          | 6,773.6<br>(5,567.4 to 8,314.8)             | 22,021.1<br>(18,570.1 to 25,848.6)          | 14,817.2<br>(12,457.0 to 17,106.2)          | 7,203.9<br>(5,944.5 to 8,874.0)             |
| Endocarditis                                  | 2,811.6<br>(2,618.0 to 3,021.8)             | 2,833.7<br>(2,647.0 to 3,036.2)             | -2.1<br>(-38.1 to -7.0)                     | 3,315.0<br>(3,130.2 to 3,534.3)             | 3,333.3<br>(3,155.3 to 3,547.6)             | -1.4<br>(-32.3 to -5.2)                     | 3,760.1<br>(3,546.2 to 4,017.2)             | 3,758.0<br>(3,545.4 to 4,009.8)             | 2.1<br>(-11.6 to 14.7)                      |
| Hemorrhagic and other stroke                  | 91,746.8<br>(89,459.1 to 94,118.7)          | 50,222.6<br>(48,874.4 to 51,510.4)          | 41,524.2<br>(40,331.8 to 42,770.9)          | 98,967.6<br>(96,643.0 to 101,473.8)         | 53,745.2<br>(52,478.5 to 55,007.4)          | 45,222.5<br>(43,894.8 to 46,544.2)          | 104,411.6<br>(102,065.5 to 107,020.0)       | 56,750.5<br>(55,426.2 to 58,108.0)          | 47,661.1<br>(46,309.7 to 49,033.6)          |
| Hypertensive heart disease                    | 35,853.3<br>(30,286.3 to 41,571.1)          | 22,411.3<br>(18,923.6 to 25,793.6)          | 13,442.0<br>(10,940.2 to 16,249.9)          | 41,076.3<br>(35,171.8 to 47,503.6)          | 26,161.5<br>(22,633.3 to 29,677.4)          | 14,914.8<br>(12,167.0 to 17,860.9)          | 48,881.1<br>(38,288.2 to 51,659.3)          | 28,971.4<br>(24,914.8 to 32,852.8)          | 15,909.7<br>(13,018.4 to 18,958.4)          |
| Ischemic heart disease                        | 327,712.0<br>(309,413.7 to 347,347.3)       | 127,673.0<br>(106,015.9 to 119,575.5)       | 214,948.3<br>(201,704.9 to 228,729.5)       | 358,416.0<br>(339,950.3 to 378,098.6)       | 125,452.2<br>(118,234.6 to 133,119.9)       | 232,963.8<br>(220,615.3 to 245,927.9)       | 393,045.8<br>(371,133.6 to 416,340.6)       | 254,858.9<br>(238,474.0 to 271,324.2)       | 254,186.9<br>(238,840.7 to 269,725.3)       |
| Ischemic stroke                               | 142,228.4<br>(138,314.9 to 146,441.6)       | 72,743.8<br>(70,741.5 to 74,773.9)          | 69,484.6<br>(67,126.0 to 71,839.7)          | 157,217.0<br>(153,281.8 to 161,512.5)       | 80,266.3<br>(78,347.4 to 82,370.4)          | 76,950.7<br>(74,538.6 to 79,427.1)          | 166,641.9<br>(162,518.8 to 170,947.3)       | 85,397.9<br>(83,366.5 to 87,595.0)          | 81,244.0<br>(78,877.9 to 83,873.7)          |
| Other cardiovascular and circulatory diseases | 404,921.8<br>(305,428.7 to 514,984.5)       | 243,081.7<br>(178,029.4 to 307,341.8)       | 161,840.1<br>(125,039.2 to 208,778.6)       | 448,279.9<br>(346,800.8 to 560,392.0)       | 275,459.8<br>(206,718.2 to 340,675.2)       | 172,820.0<br>(135,829.1 to 220,063.1)       | 497,065.8<br>(369,077.0 to 595,898.3)       | 298,588.9<br>(223,976.8 to 370,461.1)       | 180,476.9<br>(142,163.2 to 232,024.8)       |
| Peripheral artery disease                     | 798,383.7<br>(702,196.7 to 918,667.4)       | 428,450.6<br>(374,486.7 to 493,481.8)       | 369,933.1<br>(322,294.7 to 429,199.2)       | 889,855.0<br>(780,278.9 to 1,019,079.4)     | 489,727.7<br>(428,862.5 to 563,541.3)       | 400,127.3<br>(348,731.3 to 462,660.0)       | 1,001,167.0<br>(879,145.4 to 1,146,480.1)   | 457,428.5<br>(488,799.8 to 639,667.1)       | 443,738.6<br>(385,752.5 to 511,652.1)       |
| <b>Andean Latin America</b>                   |                                             |                                             |                                             |                                             |                                             |                                             |                                             |                                             |                                             |
| Atrial fibrillation and flutter               | 51,216.9<br>(44,146.9 to 59,314.9)          | 19,768.6<br>(16,959.8 to 23,007.6)          | 31,448.3<br>(27,212.0 to 36,384.3)          | 61,048.9<br>(52,522.1 to 70,896.8)          | 23,516.2<br>(20,238.4 to 27,433.8)          | 37,532.7<br>(32,408.5 to 43,740.6)          | 73,026.8<br>(62,966.3 to 84,466.8)          | 28,059.9<br>(24,137.9 to 32,733.4)          | 44,966.8<br>(38,497.1 to 52,195.7)          |
| Cardiomyopathy and myocarditis                | 5,098.5<br>(4,743.9 to 5,451.5)             | 2,717.8<br>(2,536.3 to 2,914.4)             | 2,380.7<br>(2,199.8 to 2,559.6)             | 5,827.0<br>(5,407.9 to 6,210.6)             | 3,138.1<br>(2,920.8 to 3,344.2)             | 2,688.9<br>(2,479.1 to 2,881.8)             | 6,790.2<br>(6,318.1 to 7,221.6)             | 3,657.9<br>(3,415.1 to 3,895.8)             | 3,132.3<br>(2,905.2 to 3,359.1)             |
| Endocarditis                                  | 83.0<br>(73.6 to 92.8)                      | 67.4<br>(62.3 to 72.3)                      | 15.6<br>(9.6 to 21.7)                       | 84.4<br>(75.3 to 93.1)                      | 74.5<br>(69.9 to 79.0)                      | 9.9<br>(3.3 to 16.1)                        | 97.6<br>(88.2 to 107.4)                     | 83.9<br>(79.2 to 88.5)                      | 13.8<br>(6.9 to 20.7)                       |
| Hemorrhagic and other stroke                  | 46,978.6<br>(45,585.2 to 48,559.7)          | 25,505.6<br>(24,681.1 to 26,432.1)          | 21,473.0<br>(20,745.3 to 22,181.7)          | 53,211.4<br>(51,660.0 to 54,858.3)          | 28,846.9<br>(27,921.9 to 29,846.8)          | 24,364.5<br>(23,634.8 to 25,143.7)          | 58,394.1<br>(56,806.0 to 60,170.7)          | 31,720.7<br>(30,751.9 to 32,735.9)          | 26,673.4<br>(25,875.4 to 27,531.7)          |
| Hypertensive heart disease                    | 9,948.8<br>(9,035.4 to 10,833.1)            | 5,831.1<br>(5,279.5 to 6,366.9)             | 4,117.7<br>(3,727.5 to 4,498.9)             | 12,074.8<br>(11,006.8 to 13,159.2)          | 7,088.6<br>(6,449.6 to 7,736.7)             | 4,986.2<br>(4,524.0 to 5,444.3)             | 15,306.9<br>(13,976.6 to 16,605.3)          | 8,961.7<br>(8,165.5 to 9,767.3)             | 6,345.2<br>(5,763.0 to 6,904.2)             |
| Ischemic heart disease                        | 208,234.1<br>(188,089.4 to 232,402.6)       | 90,985.0<br>(82,372.8 to 101,317.1)         | 117,249.1<br>(105,489.1 to 130,822.6)       | 235,899.2<br>(212,772.1 to 262,131.2)       | 102,854.3<br>(92,629.7 to 114,251.6)        | 133,004.9<br>(119,169.7 to 148,454.0)       | 264,215.0<br>(238,688.3 to 293,618.9)       | 114,151.2<br>(103,211.6 to 126,291.1)       | 150,063.8<br>(134,266.4 to 168,153.7)       |
| Ischemic stroke                               | 39,337.6<br>(38,174.6 to 40,594.4)          | 20,082.3<br>(19,417.0 to 20,748.2)          | 19,255.3<br>(18,630.5 to 19,857.0)          | 45,395.5<br>(44,138.9 to 46,749.9)          | 23,157.9<br>(22,471.6 to 23,932.4)          | 22,237.5<br>(21,638.6 to 22,879.7)          | 49,832.6<br>(48,483.8 to 51,245.9)          | 25,457.9<br>(24,711.0 to 26,186.2)          | 24,374.7<br>(23,667.3 to 25,105.7)          |
| Other cardiovascular and circulatory diseases | 296,065.6<br>(253,420.1 to 345,119.9)       | 93,218.2<br>(78,280.4 to 117,590.4)         | 202,847.5<br>(168,431.7 to 243,225.5)       | 329,523.2<br>(282,072.3 to 383,866.5)       | 106,040.5<br>(89,843.9 to 130,955.3)        | 223,847.2<br>(186,655.9 to 266,601.0)       | 332,859.8<br>(333,096.7 to 440,123.4)       | 124,502.4<br>(106,693.1 to 151,120.8)       | 258,307.9<br>(216,880.4 to 304,225.8)       |
| Peripheral artery disease                     | 564,512.2<br>(495,732.0 to 650,572.1)       | 284,901.0<br>(250,025.6 to 326,703.4)       | 279,611.3<br>(244,624.8 to 323,945.1)       | 672,696.3<br>(588,730.3 to 774,338.4)       | 332,859.8<br>(297,475.8 to 392,791.3)       | 489,727.7<br>(428,862.5 to 563,541.3)       | 1,001,167.0<br>(879,145.4 to 1,146,480.1)   | 457,428.5<br>(488,799.8 to 639,667.1)       | 443,738.6<br>(385,752.5 to 511,652.1)       |
| <b>Central Latin America</b>                  |                                             |                                             |                                             |                                             |                                             |                                             |                                             |                                             |                                             |
| Atrial fibrillation and flutter               | 220,396.3<br>(190,061.0 to 256,227.9)       | 87,845.6<br>(75,202.1 to 102,913.0)         | 132,550.8<br>(114,569.5 to 153,196.3)       | 259,948.9<br>(224,157.2 to 299,529.7)       | 104,314.6<br>(89,418.1 to 120,743.0)        | 155,634.3<br>(134,268.7 to 179,113.0)       | 308,719.0<br>(266,124.3 to 358,279.3)       | 123,526.6<br>(106,215.8 to 143,430.8)       | 185,192.4<br>(159,332.9 to 214,681.0)       |
| Cardiomyopathy and myocarditis                | 40,065.2<br>(37,868.8 to 42,192.7)          | 20,946.4<br>(19,864.2 to 22,003.7)          | 46,249.4<br>(17,935.7 to 20,335.5)          | 46,249.4<br>(43,611.5 to 48,745.4)          | 24,414.3<br>(23,073.8 to 25,633.8)          | 21,835.1<br>(20,539.5 to 23,221.5)          | 52,177.5<br>(49,170.6 to 54,939.1)          | 27,507.5<br>(25,986.8 to 28,878.3)          | 24,610.0<br>(23,121.7 to 26,177.1)          |
| Endocarditis                                  | 969.1<br>(885.9 to 1,072.8)                 | 667.3<br>(606.5 to 742.7)                   | 301.9<br>(273.7 to 332.5)                   | 1,104.6<br>(1,008.3 to 1,214.4)             | 758.0<br>(691.9 to 840.8)                   | 346.6<br>(313.5 to 382.1)                   | 1,229.4<br>(1,121.3 to 1,357.9)             | 846.3<br>(770.1 to 938.9)                   | 383.1<br>(347.9 to 420.7)                   |
| Hemorrhagic and other stroke                  | 106,109.4<br>(102,328.2 to 110,157.8)       | 57,264.0<br>(55,253.5 to 59,409.5)          | 48,845.4<br>(47,019.7 to 50,813.8)          | 117,959.8<br>(113,728.4 to 122,286.4)       | 63,575.4<br>(61,292.5 to 65,940.8)          | 54,384.4<br>(52,365.8 to 56,415.5)          | 127,858.4<br>(123,287.3 to 132,747.5)       | 68,090.7<br>(65,613.2 to 70,552.2)          | 59,767.6<br>(57,522.6 to 62,115.1)          |
| Hypertensive heart disease                    | 75,612.3<br>(69,530.4 to 81,659.4)          | 46,561.8<br>(42,893.7 to 50,222.4)          | 29,050.5<br>(26,446.4 to 31,552.5)          | 92,177.4<br>(84,794.0 to 99,561.6)          | 57,020.7<br>(52,625.7 to 61,225.5)          | 35,156.7<br>(32,216.8 to 38,196.8)          | 110,391.3<br>(101,644.9 to 118,827.4)       | 68,203.2<br>(62,880.0 to 73,345.4)          | 42,188.1<br>(38,704.5 to 45,823.0)          |
| Ischemic heart disease                        | 1,150,768.4<br>(1,047,851.9 to 1,271,618.7) | 558,829.1<br>(510,134.4 to 616,470.9)       | 591,939.3<br>(538,803.8 to 655,111.2)       | 1,356,038.2<br>(1,235,656.4 to 1,492,004.6) | 658,824.4<br>(601,418.8 to 724,481.1)       | 697,213.7<br>(635,084.7 to 769,003.0)       | 1,591,691.3<br>(1,452,920.6 to 1,754,469.4) | 760,487.6<br>(693,622.2 to 839,442.1)       | 831,203.7<br>(757,955.8 to 917,944.4)       |
| Ischemic stroke                               | 109,180.5<br>(106,038.0 to 112,592.8)       | 56,621.2<br>(55,045.4 to 58,417.3)          | 52,559.3<br>(50,994.1 to 54,254.9)          | 123,217.4<br>(119,310.3 to 127,462.3)       | 63,545.4<br>(61,596.7 to 65,751.1)          | 59,672.1<br>(57,816.9 to 61,739.8)          | 134,570.2<br>(130,390.2 to 139,495.3)       | 68,836.6<br>(66,750.1 to 71,353.8)          | 65,733.6<br>(63,615.1 to 68,115.6)          |
| Other cardiovascular and circulatory diseases | 1,481,820.7<br>(1,349,149.5 to 1,628,901.9) | 661,279.3<br>(600,103.6 to 738,117.0)       | 820,541.4<br>(726,166.5 to 921,458.2)       | 1,716,738.2<br>(1,56                        |                                             |                                             |                                             |                                             |                                             |



|                                               |                                                |                                             |                                             |                                                |                                             |                                               |                                                |                                             |                                               |
|-----------------------------------------------|------------------------------------------------|---------------------------------------------|---------------------------------------------|------------------------------------------------|---------------------------------------------|-----------------------------------------------|------------------------------------------------|---------------------------------------------|-----------------------------------------------|
| Peripheral artery disease                     | 42,079.3<br>(36,541.2 to 48,988.7)             | 21,385.1<br>(18,595.7 to 24,849.0)          | 20,694.2<br>(17,916.6 to 24,103.1)          | 49,262.6<br>(42,974.7 to 57,230.4)             | 25,371.9<br>(22,044.9 to 29,416.5)          | 23,890.7<br>(20,834.8 to 27,950.1)            | 58,339.0<br>(51,015.7 to 67,519.3)             | 30,219.0<br>(26,348.7 to 35,001.0)          | 28,120.0<br>(24,368.8 to 32,554.1)            |
| <b>East Asia</b>                              |                                                |                                             |                                             |                                                |                                             |                                               |                                                |                                             |                                               |
| Atrial fibrillation and flutter               | 2,958,525.5<br>(2,555,822.5 to 3,385,992.6)    | 1,287,908.5<br>(1,112,837.0 to 1,478,348.2) | 1,670,617.0<br>(1,445,820.0 to 1,917,584.3) | 3,389,296.6<br>(2,937,614.9 to 3,873,978.1)    | 1,448,362.4<br>(1,258,747.6 to 1,665,489.8) | 1,940,934.0<br>(1,680,782.3 to 2,217,063.7)   | 3,936,287.5<br>(3,416,506.6 to 4,491,704.6)    | 1,673,914.7<br>(1,453,600.5 to 1,924,064.9) | 2,262,372.8<br>(1,961,460.7 to 2,590,530.2)   |
| Cardiomyopathy and myocarditis                | 137,315.5<br>(131,694.8 to 142,964.9)          | 69,992.8<br>(67,216.2 to 72,947.8)          | 67,322.7<br>(64,093.9 to 70,475.8)          | 152,342.8<br>(145,987.6 to 158,847.8)          | 77,930.6<br>(74,581.4 to 81,283.0)          | 74,412.2<br>(70,817.7 to 77,982.9)            | 168,821.9<br>(161,507.7 to 175,988.6)          | 88,425.8<br>(84,419.4 to 92,258.3)          | 80,396.1<br>(76,479.6 to 84,176.3)            |
| Endocarditis                                  | 3,311.6<br>(2,989.3 to 3,705.2)                | 2,043.9<br>(1,106.5 to 1,457.7)             | 2,043.9<br>(1,779.5 to 2,320.8)             | 3,767.9<br>(3,380.2 to 4,218.2)                | 1,461.2<br>(1,268.8 to 1,684.0)             | 2,306.7<br>(2,029.7 to 2,626.5)               | 4,171.6<br>(3,750.5 to 4,684.6)                | 1,649.1<br>(1,415.5 to 1,910.2)             | 2,522.5<br>(2,238.1 to 2,859.0)               |
| Hemorrhagic and other stroke                  | 3,330,860.0<br>(3,244,025.0 to 3,432,217.2)    | 1,554,149.1<br>(1,511,249.4 to 1,602,990.1) | 1,776,711.0<br>(1,732,464.3 to 1,828,537.0) | 3,815,115.3<br>(3,724,888.5 to 3,909,097.9)    | 1,754,082.4<br>(1,710,833.1 to 1,797,742.9) | 2,061,032.7<br>(2,014,811.2 to 2,111,540.3)   | 4,194,745.2<br>(4,098,203.7 to 4,298,756.7)    | 1,888,653.9<br>(1,841,025.4 to 1,941,714.4) | 2,306,091.3<br>(2,253,411.5 to 2,361,149.6)   |
| Hypertensive heart disease                    | 684,942.6<br>(652,045.3 to 720,173.9)          | 359,411.6<br>(342,058.2 to 377,287.4)       | 325,531.0<br>(310,252.6 to 342,473.6)       | 800,855.5<br>(762,189.9 to 840,808.2)          | 416,790.0<br>(396,862.8 to 437,004.4)       | 384,065.4<br>(365,853.3 to 403,640.0)         | 978,563.1<br>(929,543.2 to 1,028,101.6)        | 509,256.0<br>(483,804.8 to 534,913.3)       | 469,307.1<br>(445,892.2 to 493,889.5)         |
| Ischemic heart disease                        | 7,931,525.4<br>(7,175,279.9 to 8,831,787.8)    | 3,304,896.8<br>(2,990,229.6 to 3,674,647.6) | 4,626,628.6<br>(4,169,660.3 to 5,160,275.7) | 9,325,527.6<br>(8,426,496.4 to 10,353,565.1)   | 3,851,965.2<br>(3,488,515.3 to 4,271,261.5) | 5,473,562.0<br>(4,930,847.7 to 6,073,950.8)   | 11,121,618.8<br>(10,039,906.1 to 12,324,366.7) | 4,575,161.9<br>(4,146,449.8 to 5,071,679.8) | 6,546,456.7<br>(5,905,080.2 to 7,271,066.5)   |
| Ischemic stroke                               | 4,208,116.3<br>(4,096,390.0 to 4,333,109.9)    | 1,824,920.7<br>(1,774,999.8 to 1,881,790.8) | 2,383,195.5<br>(2,316,654.1 to 2,453,125.1) | 4,791,104.3<br>(4,674,600.3 to 4,915,354.5)    | 2,050,144.4<br>(1,999,789.4 to 2,104,009.7) | 2,740,959.6<br>(2,674,860.8 to 2,814,219.7)   | 5,304,985.4<br>(5,171,227.4 to 5,446,824.5)    | 2,245,437.4<br>(2,185,853.6 to 2,307,562.5) | 3,059,547.9<br>(2,981,571.9 to 3,142,715.4)   |
| Other cardiovascular and circulatory diseases | 13,891,170.4<br>(12,664,004.9 to 15,555,583.3) | 5,213,212.8<br>(4,656,545.0 to 6,184,918.7) | 8,677,957.6<br>(7,653,864.9 to 9,882,194.6) | 15,824,633.1<br>(14,381,535.9 to 17,718,848.9) | 5,824,439.6<br>(5,226,556.3 to 6,760,931.1) | 10,000,192.9<br>(8,746,403.7 to 11,533,359.5) | 16,707,052.9<br>(15,430,210.1 to 18,400,081.0) | 6,530,848.1<br>(5,988,758.5 to 7,340,228.8) | 10,176,204.5<br>(9,066,057.3 to 11,511,757.2) |
| Peripheral artery disease                     | 12,825,457.6<br>(11,176,407.1 to 14,857,131.2) | 6,588,138.8<br>(5,744,166.3 to 7,629,305.6) | 6,237,318.7<br>(5,437,284.7 to 7,225,418.8) | 14,749,066.8<br>(12,896,653.1 to 17,038,071.6) | 7,561,900.1<br>(6,612,402.9 to 8,716,603.7) | 7,187,166.0<br>(6,272,805.1 to 8,329,787.5)   | 16,872,831.7<br>(14,750,931.5 to 19,433,421.7) | 8,618,817.4<br>(7,539,204.8 to 9,936,759.1) | 8,254,014.2<br>(7,202,076.2 to 9,552,114.5)   |
| <b>Southeast Asia</b>                         |                                                |                                             |                                             |                                                |                                             |                                               |                                                |                                             |                                               |
| Atrial fibrillation and flutter               | 947,314.3<br>(822,806.8 to 1,090,899.7)        | 405,761.5<br>(349,342.6 to 470,480.3)       | 541,552.8<br>(469,755.8 to 621,434.4)       | 1,104,225.6<br>(959,996.4 to 1,268,395.8)      | 474,891.4<br>(409,856.1 to 548,197.5)       | 629,334.2<br>(548,177.7 to 723,646.5)         | 1,291,821.4<br>(1,123,538.5 to 1,490,653.5)    | 559,145.4<br>(482,469.2 to 649,783.0)       | 732,676.1<br>(636,647.3 to 842,347.9)         |
| Cardiomyopathy and myocarditis                | 85,838.4<br>(81,050.2 to 90,511.2)             | 42,971.9<br>(40,451.6 to 45,375.0)          | 42,866.6<br>(40,548.9 to 45,147.3)          | 98,366.9<br>(93,069.7 to 103,696.3)            | 49,572.8<br>(46,769.0 to 52,336.1)          | 48,794.1<br>(46,033.8 to 51,481.6)            | 111,492.3<br>(105,321.4 to 117,530.0)          | 56,724.9<br>(53,434.8 to 59,861.3)          | 54,767.4<br>(51,647.0 to 57,865.1)            |
| Endocarditis                                  | 2,848.5<br>(2,693.2 to 3,006.4)                | 1,699.4<br>(1,508.6 to 1,716.7)             | 1,239.1<br>(1,176.0 to 1,304.7)             | 3,405.6<br>(3,236.7 to 3,573.2)                | 1,942.9<br>(1,836.8 to 2,049.6)             | 1,462.7<br>(1,392.3 to 1,530.5)               | 3,950.4<br>(3,775.6 to 4,139.7)                | 2,264.8<br>(2,150.1 to 2,384.8)             | 1,685.6<br>(1,605.9 to 1,764.0)               |
| Hemorrhagic and other stroke                  | 1,166,066.0<br>(1,137,486.3 to 1,195,427.9)    | 545,210.4<br>(531,072.1 to 560,067.9)       | 620,855.6<br>(605,140.0 to 636,758.6)       | 1,302,540.3<br>(1,274,109.6 to 1,331,456.7)    | 611,925.2<br>(597,180.6 to 627,268.4)       | 690,615.1<br>(673,569.5 to 707,467.9)         | 1,463,508.7<br>(1,431,504.6 to 1,498,072.5)    | 494,475.7<br>(478,257.9 to 711,844.9)       | 769,033.1<br>(751,462.5 to 787,498.7)         |
| Hypertensive heart disease                    | 169,661.3<br>(156,688.6 to 182,799.6)          | 102,302.7<br>(94,424.3 to 110,539.2)        | 67,358.6<br>(61,806.7 to 72,437.7)          | 198,485.8<br>(183,156.0 to 213,286.0)          | 120,356.2<br>(110,523.0 to 129,715.2)       | 78,129.5<br>(71,963.0 to 84,014.4)            | 234,330.9<br>(216,450.8 to 252,186.4)          | 143,694.7<br>(132,395.0 to 155,120.4)       | 90,636.2<br>(83,447.9 to 99,979.0)            |
| Ischemic heart disease                        | 3,273,168.9<br>(2,868,087.1 to 3,798,150.3)    | 1,442,477.0<br>(1,273,374.7 to 1,641,935.2) | 1,830,699.9<br>(1,582,049.0 to 2,164,916.9) | 3,879,469.9<br>(3,406,363.2 to 4,471,084.4)    | 1,717,116.2<br>(1,530,650.9 to 1,965,652.1) | 2,162,116.2<br>(1,872,507.1 to 2,523,743.1)   | 4,576,773.9<br>(4,047,444.1 to 5,230,906.9)    | 2,021,216.7<br>(1,805,300.1 to 2,280,033.2) | 2,955,557.5<br>(2,229,094.3 to 2,954,560.5)   |
| Ischemic stroke                               | 1,161,988.3<br>(1,133,545.7 to 1,190,554.7)    | 547,416.8<br>(532,643.0 to 562,936.0)       | 614,571.6<br>(598,900.9 to 630,428.4)       | 1,324,827.5<br>(1,294,219.6 to 1,355,583.4)    | 692,709.8<br>(616,004.5 to 648,482.6)       | 692,709.8<br>(676,818.5 to 709,031.6)         | 1,487,905.9<br>(1,453,374.9 to 1,525,190.7)    | 716,905.9<br>(697,901.9 to 736,543.2)       | 770,890.4<br>(752,661.7 to 791,143.0)         |
| Other cardiovascular and circulatory diseases | 4,361,844.1<br>(3,986,677.6 to 4,765,601.1)    | 1,852,273.6<br>(1,693,628.4 to 2,054,054.9) | 2,509,570.7<br>(2,229,971.9 to 2,801,380.9) | 4,918,694.7<br>(4,510,182.6 to 5,348,768.8)    | 2,151,162.3<br>(1,974,488.7 to 2,360,993.2) | 2,767,532.4<br>(2,476,600.8 to 3,097,581.6)   | 5,481,431.4<br>(5,068,409.3 to 5,981,830.0)    | 2,475,601.6<br>(2,284,326.1 to 2,697,905.4) | 3,005,830.1<br>(2,702,845.3 to 3,340,898.8)   |
| Peripheral artery disease                     | 15,575,514.1<br>(14,526,198.0 to 16,592,958.3) | 7,222,490.7<br>(6,375,442.1 to 8,145,781.5) | 2,453,023.6<br>(2,139,938.7 to 2,850,546.8) | 6,046,339.5<br>(5,278,285.7 to 7,019,836.9)    | 3,208,391.3<br>(2,813,447.5 to 3,708,150.5) | 2,837,948.2<br>(2,479,693.2 to 3,303,505.8)   | 7,049,349.3<br>(6,179,372.8 to 8,117,091.4)    | 3,742,632.5<br>(3,276,809.2 to 4,303,017.6) | 3,306,717.4<br>(2,882,213.4 to 3,834,207.7)   |
| <b>South Asia</b>                             |                                                |                                             |                                             |                                                |                                             |                                               |                                                |                                             |                                               |
| Atrial fibrillation and flutter               | 1,814,586.7<br>(1,570,123.2 to 2,097,487.7)    | 644,264.2<br>(555,087.0 to 749,160.7)       | 1,170,322.6<br>(1,011,766.4 to 1,350,317.9) | 2,094,728.0<br>(1,814,305.9 to 2,416,198.1)    | 752,466.2<br>(648,608.1 to 875,092.4)       | 1,342,261.9<br>(1,159,718.2 to 1,544,765.1)   | 2,453,665.9<br>(2,122,832.5 to 2,837,696.4)    | 892,418.4<br>(769,701.6 to 1,042,238.2)     | 1,561,247.5<br>(1,344,508.2 to 1,802,622.0)   |
| Cardiomyopathy and myocarditis                | 81,119.0<br>(76,694.7 to 85,781.2)             | 43,266.2<br>(40,933.4 to 45,758.2)          | 37,852.7<br>(35,618.6 to 40,344.2)          | 92,942.9<br>(87,951.5 to 97,992.4)             | 49,412.6<br>(46,765.2 to 52,229.1)          | 43,330.3<br>(40,948.2 to 46,130.8)            | 106,151.2<br>(100,494.2 to 111,879.1)          | 56,326.9<br>(53,415.0 to 59,290.7)          | 49,824.3<br>(46,919.9 to 52,821.3)            |
| Endocarditis                                  | 4,918.7<br>(4,333.6 to 5,612.7)                | 2,655.4<br>(2,307.4 to 3,076.6)             | 2,263.4<br>(1,993.6 to 2,564.3)             | 5,973.6<br>(5,257.4 to 6,827.0)                | 3,240.4<br>(2,825.7 to 3,740.8)             | 2,733.1<br>(2,415.3 to 3,096.2)               | 7,159.5<br>(6,376.3 to 8,143.6)                | 3,897.6<br>(3,407.1 to 4,483.8)             | 3,261.9<br>(2,912.3 to 3,672.5)               |
| Hemorrhagic and other stroke                  | 2,311,165.5<br>(2,246,928.6 to 2,381,422.1)    | 1,059,344.0<br>(1,028,430.0 to 1,091,922.0) | 1,251,821.5<br>(1,217,092.0 to 1,290,322.0) | 2,587,939.3<br>(2,527,866.5 to 2,654,530.9)    | 1,184,090.8<br>(1,154,755.9 to 1,216,020.2) | 1,403,848.6<br>(1,372,053.8 to 1,439,751.8)   | 2,852,771.6<br>(2,782,518.5 to 2,928,161.2)    | 1,289,037.0<br>(1,255,550.5 to 1,325,165.2) | 1,563,734.5<br>(1,526,439.9 to 1,604,741.6)   |
| Hypertensive heart disease                    | 459,681.9<br>(435,313.2 to 484,451.9)          | 230,034.8<br>(218,181.8 to 242,901.3)       | 229,647.1<br>(217,095.6 to 242,604.1)       | 553,473.8<br>(524,042.2 to 583,939.3)          | 278,817.1<br>(264,134.5 to 294,542.5)       | 274,662.1<br>(259,287.1 to 289,544.0)         | 669,755.9<br>(634,759.8 to 704,889.2)          | 340,419.8<br>(321,994.0 to 358,707.4)       | 329,336.1<br>(311,325.5 to 347,176.7)         |
| Ischemic heart disease                        | 10,233,045.7<br>(9,237,815.4 to 11,399,196.3)  | 3,782,731.5<br>(3,409,642.9 to 4,214,592.4) | 6,450,314.7<br>(5,813,545.9 to 7,201,003.3) | 11,859,249.1<br>(10,681,611.0 to 13,190,944.7) | 4,452,812.3<br>(4,008,702.5 to 4,955,654.4) | 7,406,437.3<br>(6,669,861.3 to 8,245,652.6)   | 14,402,629.3<br>(13,043,776.2 to 15,993,864.6) | 5,441,864.3<br>(4,888,348.8 to 6,016,319.6) | 8,990,764.5<br>(8,122,927.5 to 10,026,794.0)  |
| Ischemic stroke                               | 2,259,158.9<br>(2,199,406.1 to 2,323,842.3)    | 994,819.3<br>(965,352.7 to 1,023,559.0)     | 1,264,339.7<br>(1,229,807.8 to 1,301,099.1) | 2,568,236.1<br>(2,505,541.2 to 2,633,633.7)    | 1,142,652.2<br>(1,114,406.6 to 1,172,317.1) | 1,425,584.0<br>(1,391,790.2 to 1,462,446.2)   | 2,874,071.1<br>(2,802,647.6 to 2,949,197.9)    | 1,280,773.6<br>(1,244,610.8 to 1,316,952.3) | 1,593,297.4<br>(1,555,117.9 to 1,631,434.1)   |
| Other cardiovascular and circulatory diseases | 307,528.2<br>(286,875.5 to 328,074.7)          | 121,362.1<br>(113,054.5 to 129,392.8)       | 186,166.1<br>(173,091.4 to 200,052.5)       | 368,749.0<br>(343,919.3 to 393,744.4)          | 147,167.7<br>(137,189.7 to 157,318.5)       | 221,581.3<br>(206,315.1 to 237,305.7)         | 446,032.5<br>(416,534.9 to 475,978.7)          | 180,567.4<br>(168,699.6 to 192,221.2)       | 265,465.4<br>(247,135.3 to 283,912.5)         |
| Peripheral artery disease                     | 11,397,835.5<br>(9,954,722.2 to 13,226,939.4)  | 5,942,466.5<br>(4,765,227.2 to 6,329,337.7) | 5,942,466.5<br>(5,195,220.0 to 6,897,937.4) | 13,127,259.4<br>(11,496,169.6 to 15,176,286.7) | 6,739,414.5<br>(5,553,364.6 to 7,338,171.7) | 6,739,414.5<br>(5,919,768.3 to 7,853,189.5)   | 15,355,613.8<br>(13,412,459.8 to 17,765,011.7) | 7,521,303.9<br>(6,579,051.8 to 8,708,560.3) | 8,344,309.3<br>(6,831,876.9 to 9,086,615.7)   |
| <b>North Africa and Middle East</b>           |                                                |                                             |                                             |                                                |                                             |                                               |                                                |                                             |                                               |
| Atrial fibrillation and flutter               | 425,325.0<br>(365,445.1 to 493,759.4)          | 171,313.7<br>(147,236.5 to 200,264.1)       | 254,011.3<br>(218,304.6 to 295,358.9)       | 505,860.6<br>(435,466.8 to 586,429.7)          | 202,473.4<br>(174,196.2 to 236,569.4)       | 303,387.2<br>(260,877.8 to 350,798.8)         | 592,818.1<br>(510,486.9 to 684,716.3)          | 237,293.4<br>(203,318.4 to 276,573.7)       | 355,524.7<br>(306,386.2 to 410,141.1)         |
| Cardiomyopathy and myocarditis                | 78,766.7<br>(74,647.7 to 82,763.5)             | 38,754.5<br>(36,676.5 to 40,910.6)          | 40,012.3<br>(37,861.9 to 42,188.0)          | 92,038.2<br>(87,196.0 to 96,924.1)             | 49,120.0<br>(42,731.7 to 47,576.6)          | 46,918.1<br>(44,443.3 to 49,446.8)            | 105,930.7<br>(100,281.0 to 111,655.4)          | 52,086.4<br>(49,260.9 to 54,869.3)          | 53,844.3<br>(50,977.0 to 56,862.8)            |
| Endocarditis                                  | 7,638.2<br>(7,314.9 to 7,974.3)                | 6,892.2<br>(6,591.9 to 7,214.0)             | 746.0<br>(697.4 to 796.8)                   | 9,061.8<br>(8,736.8 to 9,375.1)                | 8,209.6<br>(7,914.7 to 8,505.6)             | 852.1<br>(802.2 to 906.6)                     | 10,826.4<br>(10,451.7 to 11,211.0)             | 9,873.0<br>(9,511.3 to 10,233.6)            | 953.4<br>(900.1 to 1,010.4)                   |
| Hemorrhagic and other stroke                  | 542,801.1<br>(529,075.7 to 557,228.4)          | 247,663.6<br>(287,536.8 to 303,086.9)       | 247,663.6<br>(241,322.4 to 254,418.8)       | 643,213.8<br>(628,037.3 to 659,561.2)          | 347,974.5<br>(339,573.4 to 376,568.7)       | 295,239.3<br>(288,053.2 to 302,473.9)         | 736,250.2<br>(719,995.5 to 753,118.8)          | 400,317.9<br>(391,230.7 to 409,522.5)       | 335,932.3<br>(328,054.1 to 344,149.2)         |
| Hypertensive heart disease                    | 94,996.3<br>(87,505.6 to 102,620.3)            | 63,469.7<br>(58,279.1 to 68,572.2)          | 31,526.6<br>(28,994.5 to 34,096.8)          | 111,452.3<br>(102,771.6 to 120,490.5)          | 74,294.6<br>(68,528.1 to 80,288.2)          | 37,157.7<br>(34,080.1 to 40,312.3)            | 128,660.2<br>(118,778.5 to 139                 |                                             |                                               |

| Western Sub-Saharan Africa                    |                                             |                                             |                                             |                                             |                                             |                                             |                                             |                                             |                                             |
|-----------------------------------------------|---------------------------------------------|---------------------------------------------|---------------------------------------------|---------------------------------------------|---------------------------------------------|---------------------------------------------|---------------------------------------------|---------------------------------------------|---------------------------------------------|
| Atrial fibrillation and flutter               | 181,137.1<br>(155,906.4 to 211,923.6)       | 69,312.2<br>(58,827.4 to 81,211.1)          | 111,824.9<br>(96,176.4 to 130,872.4)        | 207,191.0<br>(178,557.4 to 241,723.0)       | 78,970.1<br>(67,493.9 to 92,853.3)          | 128,220.9<br>(110,252.6 to 148,866.5)       | 233,960.5<br>(200,623.0 to 272,475.4)       | 88,310.6<br>(75,086.9 to 103,556.1)         | 145,650.0<br>(124,781.3 to 170,140.2)       |
| Cardiomyopathy and myocarditis                | 70,239.7<br>(65,789.2 to 74,808.5)          | 30,690.7<br>(28,696.9 to 32,630.5)          | 39,549.0<br>(36,931.4 to 42,349.5)          | 81,882.2<br>(76,677.6 to 87,108.0)          | 35,902.0<br>(33,660.5 to 38,373.9)          | 45,980.2<br>(42,883.5 to 49,049.6)          | 97,384.9<br>(91,353.3 to 103,733.7)         | 42,425.4<br>(39,638.5 to 45,190.6)          | 54,959.5<br>(51,490.0 to 58,699.4)          |
| Endocarditis                                  | 1,341.2<br>(1,266.4 to 1,420.9)             | 746.4<br>(701.3 to 791.2)                   | 594.8<br>(561.8 to 631.1)                   | 1,537.9<br>(1,459.2 to 1,623.0)             | 859.8<br>(812.3 to 908.6)                   | 678.1<br>(642.8 to 715.8)                   | 1,744.5<br>(1,653.3 to 1,840.8)             | 971.4<br>(920.9 to 1,027.2)                 | 773.1<br>(733.9 to 813.8)                   |
| Hemorrhagic and other stroke                  | 384,381.9<br>(374,890.0 to 394,286.8)       | 194,301.9<br>(189,414.9 to 199,257.9)       | 190,079.9<br>(185,135.0 to 195,570.3)       | 434,174.3<br>(424,461.2 to 444,505.6)       | 218,454.6<br>(213,458.4 to 223,345.0)       | 215,719.7<br>(210,557.5 to 221,275.3)       | 491,265.3<br>(480,603.2 to 502,660.7)       | 245,730.4<br>(240,360.2 to 251,346.5)       | 245,534.9<br>(239,997.6 to 251,973.4)       |
| Hypertensive heart disease                    | 112,203.6<br>(104,257.5 to 120,140.4)       | 47,977.3<br>(44,230.5 to 51,865.1)          | 64,226.3<br>(59,906.3 to 68,741.2)          | 132,016.7<br>(122,949.8 to 141,174.4)       | 56,434.2<br>(52,058.5 to 60,916.0)          | 75,582.5<br>(70,502.4 to 80,717.2)          | 151,124.2<br>(140,971.7 to 161,632.9)       | 64,296.6<br>(59,433.7 to 69,604.7)          | 86,827.6<br>(80,976.2 to 92,826.5)          |
| Ischemic heart disease                        | 1,132,415.6<br>(997,863.6 to 1,294,837.7)   | 382,991.5<br>(341,501.2 to 432,351.8)       | 749,424.1<br>(654,541.3 to 865,310.1)       | 1,334,317.5<br>(1,175,462.6 to 1,522,805.1) | 451,087.4<br>(402,746.8 to 506,387.0)       | 883,230.1<br>(768,847.9 to 1,023,268.5)     | 1,562,357.2<br>(1,379,377.8 to 1,776,072.4) | 526,389.9<br>(471,555.6 to 589,362.2)       | 1,035,967.3<br>(904,131.7 to 1,197,871.2)   |
| Ischemic stroke                               | 337,661.8<br>(329,781.7 to 345,734.2)       | 175,536.1<br>(171,006.3 to 180,020.7)       | 162,125.7<br>(158,299.5 to 166,192.3)       | 383,009.7<br>(374,778.4 to 391,985.6)       | 199,505.7<br>(194,721.3 to 204,495.6)       | 183,504.0<br>(179,708.4 to 187,802.5)       | 431,002.8<br>(421,600.6 to 440,544.9)       | 223,373.5<br>(218,319.3 to 228,581.1)       | 207,629.3<br>(203,174.0 to 212,462.3)       |
| Other cardiovascular and circulatory diseases | 4,100,823.3<br>(3,795,922.3 to 4,423,619.3) | 2,474,755.7<br>(2,276,581.3 to 2,670,016.2) | 1,626,067.5<br>(1,457,025.9 to 1,815,835.2) | 4,754,600.9<br>(4,386,348.5 to 5,125,276.0) | 2,811,108.0<br>(2,580,880.0 to 3,056,229.9) | 1,943,492.9<br>(1,750,614.5 to 2,172,754.3) | 5,456,970.6<br>(5,055,575.6 to 5,876,229.3) | 3,228,957.5<br>(2,981,195.2 to 3,492,347.1) | 2,228,012.8<br>(2,007,258.3 to 2,478,956.8) |
| Peripheral artery disease                     | 2,116,526.4<br>(1,844,458.3 to 2,455,103.5) | 1,047,813.3<br>(910,136.1 to 1,221,079.9)   | 1,068,713.1<br>(928,914.2 to 1,238,985.9)   | 2,439,655.6<br>(2,123,499.7 to 2,841,513.8) | 1,196,307.2<br>(1,039,911.3 to 1,392,195.9) | 1,243,348.5<br>(1,083,357.7 to 1,452,081.7) | 2,772,399.4<br>(2,409,908.6 to 3,229,364.6) | 1,354,409.3<br>(1,179,493.6 to 1,584,384.1) | 1,417,990.0<br>(1,233,362.2 to 1,658,447.5) |



**eTable 3b. Prevalent Cases of Cardiovascular Causes for Years 2005-2015, with Upper and Lower Uncertainty Bounds**

|                                               | 2005                                              |                                                |                                                | 2010                                              |                                                |                                                | 2015                                              |                                                |                                                |
|-----------------------------------------------|---------------------------------------------------|------------------------------------------------|------------------------------------------------|---------------------------------------------------|------------------------------------------------|------------------------------------------------|---------------------------------------------------|------------------------------------------------|------------------------------------------------|
|                                               | Both                                              | Female                                         | Male                                           | Both                                              | Female                                         | Male                                           | Both                                              | Female                                         | Male                                           |
| <b>Global</b>                                 |                                                   |                                                |                                                |                                                   |                                                |                                                |                                                   |                                                |                                                |
| Atrial fibrillation and flutter               | 25,972,916.8<br>(23,415,025.0 to 28,914,427.2)    | 11,322,923.2<br>(10,181,595.2 to 12,680,487.6) | 14,649,993.2<br>(13,169,850.3 to 16,360,136.2) | 29,291,292.6<br>(26,408,048.2 to 32,683,726.0)    | 12,614,970.9<br>(11,321,421.3 to 14,132,562.5) | 16,676,321.6<br>(14,986,719.6 to 18,633,227.4) | 33,294,320.5<br>(29,959,778.3 to 37,202,042.0)    | 14,233,577.3<br>(12,755,732.8 to 15,923,714.5) | 19,060,742.6<br>(17,125,194.8 to 21,369,172.2) |
| Cardiomyopathy and myocarditis                | 2,002,549.9<br>(1,905,403.9 to 2,093,217.5)       | 1,082,389.8<br>(1,028,236.6 to 1,135,770.1)    | 920,160.1<br>(876,577.4 to 964,133.9)          | 2,251,299.0<br>(2,136,573.8 to 2,359,228.3)       | 1,221,382.3<br>(1,155,272.0 to 1,283,672.8)    | 1,029,916.7<br>(978,668.4 to 1,081,379.1)      | 2,536,768.0<br>(2,404,778.9 to 2,661,364.5)       | 1,382,806.8<br>(1,305,843.3 to 1,458,330.1)    | 1,153,961.2<br>(1,097,668.6 to 1,212,526.0)    |
| Endocarditis                                  | 94,244.9<br>(88,560.9 to 100,846.1)               | 68,894.0<br>(64,813.6 to 73,467.5)             | 25,350.9<br>(23,589.0 to 27,337.8)             | 103,673.0<br>(97,570.9 to 111,081.7)              | 75,419.5<br>(70,963.0 to 80,665.4)             | 28,253.5<br>(26,312.0 to 30,466.4)             | 115,670.7<br>(108,053.1 to 124,766.3)             | 84,078.3<br>(78,594.0 to 90,548.5)             | 31,592.4<br>(29,311.0 to 34,202.4)             |
| Hemorrhagic and other stroke                  | 15,661,003.2<br>(15,338,627.1 to 16,020,094.4)    | 7,694,839.6<br>(7,443,023.9 to 7,980,719.7)    | 8,066,163.6<br>(7,890,820.9 to 8,234,745.2)    | 16,896,969.9<br>(16,555,823.9 to 17,281,109.4)    | 8,084,965.0<br>(7,911,636.5 to 8,271,052.6)    | 8,811,632.6<br>(8,636,766.9 to 9,007,357.3)    | 18,699,621.6<br>(18,258,729.0 to 19,124,482.3)    | 8,900,796.9<br>(8,700,080.7 to 9,121,276.5)    | 9,768,824.3<br>(9,543,516.6 to 10,012,684.7)   |
| Hypertensive heart disease                    | 4,440,375.5<br>(4,181,207.6 to 4,691,139.3)       | 2,491,837.0<br>(2,341,202.2 to 2,635,812.7)    | 1,948,538.5<br>(1,837,805.8 to 2,063,169.3)    | 3,201,392.2<br>(3,049,250.5 to 3,363,857.2)       | 2,889,202.6<br>(2,720,220.5 to 3,063,857.2)    | 3,266,218.8<br>(3,173,811.5 to 3,444,169.5)    | 6,086,343.2<br>(5,732,653.4 to 6,434,074.2)       | 3,266,519.6<br>(3,164,973.1 to 3,357,979.4)    | 2,799,223.4<br>(2,562,521.1 to 2,982,677.8)    |
| Ischemic heart disease                        | 87,821,757.1<br>(80,432,245.8 to 96,508,868.2)    | 36,684,739.0<br>(33,618,292.1 to 40,325,787.9) | 51,137,016.6<br>(46,762,084.5 to 56,155,356.1) | 96,966,837.7<br>(88,592,301.0 to 106,752,837.8)   | 40,561,622.5<br>(37,125,583.0 to 44,636,977.1) | 56,405,178.2<br>(51,486,274.2 to 62,234,568.8) | 110,550,304.8<br>(100,675,889.7 to 121,798,659.7) | 46,102,254.7<br>(42,134,035.4 to 50,800,684.3) | 64,448,047.5<br>(58,685,079.0 to 71,017,092.4) |
| Ischemic stroke                               | 20,467,281.6<br>(20,008,422.5 to 20,991,381.9)    | 9,831,782.7<br>(9,612,767.4 to 10,085,233.4)   | 10,635,498.6<br>(10,393,380.2 to 10,906,149.6) | 22,207,180.5<br>(21,719,278.9 to 22,749,138.7)    | 10,604,734.9<br>(10,373,427.7 to 10,862,220.5) | 11,602,446.3<br>(11,346,554.1 to 11,894,370.5) | 24,929,025.8<br>(24,362,226.3 to 25,609,959.7)    | 11,621,196.4<br>(11,625,158.6 to 12,233,046.1) | 13,026,828.7<br>(12,718,239.5 to 13,382,922.3) |
| Other cardiovascular and circulatory diseases | 72,771,723.0<br>(68,089,703.7 to 77,762,925.0)    | 34,469,238.8<br>(32,306,286.1 to 36,948,606.0) | 38,302,483.8<br>(35,273,562.6 to 41,688,821.4) | 80,425,512.4<br>(75,346,083.4 to 86,040,625.9)    | 38,436,718.2<br>(35,963,514.2 to 41,160,746.5) | 41,988,796.9<br>(38,272,808.2 to 45,480,569.4) | 90,347,588.7<br>(84,710,656.4 to 96,668,717.5)    | 43,536,603.7<br>(40,727,282.2 to 46,518,087.9) | 46,810,982.7<br>(43,331,373.8 to 50,439,841.3) |
| Peripheral artery disease                     | 115,109,151.0<br>(101,439,286.1 to 131,404,852.3) | 61,146,628.0<br>(53,832,225.9 to 69,563,592.2) | 53,962,521.3<br>(47,448,694.7 to 61,885,680.8) | 133,345,712.3<br>(117,528,239.3 to 151,949,856.5) | 70,493,109.4<br>(62,394,069.0 to 80,219,817.4) | 62,852,606.2<br>(55,267,003.1 to 71,862,332.5) | 154,650,579.8<br>(136,318,041.8 to 176,210,888.8) | 81,755,712.3<br>(72,344,609.4 to 92,826,953.7) | 72,894,864.0<br>(64,169,063.8 to 83,410,627.0) |
| <b>Central Asia</b>                           |                                                   |                                                |                                                |                                                   |                                                |                                                |                                                   |                                                |                                                |
| Atrial fibrillation and flutter               | 305,544.0<br>(266,378.0 to 350,070.7)             | 142,195.8<br>(122,815.0 to 165,685.8)          | 163,348.3<br>(141,208.2 to 186,609.0)          | 329,407.2<br>(287,282.6 to 375,627.2)             | 150,171.9<br>(129,660.0 to 174,185.8)          | 179,235.3<br>(154,662.0 to 205,860.0)          | 376,888.4<br>(328,238.3 to 429,352.0)             | 171,245.1<br>(147,586.0 to 198,567.8)          | 205,643.3<br>(176,989.3 to 236,115.4)          |
| Cardiomyopathy and myocarditis                | 8,818.6<br>(8,273.6 to 9,353.7)                   | 4,083.0<br>(3,833.2 to 4,331.2)                | 4,735.6<br>(4,421.2 to 5,066.9)                | 9,979.0<br>(9,404.1 to 10,584.2)                  | 4,645.8<br>(4,365.8 to 4,921.6)                | 5,333.2<br>(4,994.8 to 5,690.3)                | 11,136.1<br>(10,471.1 to 11,811.9)                | 5,183.1<br>(4,800.4 to 5,489.1)                | 5,953.0<br>(5,564.1 to 6,350.9)                |
| Endocarditis                                  | 504.4<br>(485.0 to 523.2)                         | 265.1<br>(254.1 to 276.0)                      | 239.3<br>(230.4 to 247.6)                      | 550.6<br>(528.8 to 571.2)                         | 283.9<br>(272.5 to 295.8)                      | 266.8<br>(256.3 to 276.2)                      | 616.6<br>(589.0 to 643.3)                         | 315.7<br>(300.7 to 331.3)                      | 300.9<br>(282.2 to 313.8)                      |
| Hemorrhagic and other stroke                  | 244,101.2<br>(239,466.5 to 248,758.0)             | 133,162.1<br>(130,629.6 to 135,892.2)          | 110,939.1<br>(108,728.1 to 113,180.1)          | 257,507.8<br>(252,762.6 to 262,572.3)             | 139,799.9<br>(137,163.3 to 142,708.8)          | 117,707.8<br>(115,512.5 to 120,032.8)          | 285,030.7<br>(279,091.1 to 291,260.1)             | 157,927.9<br>(152,515.4 to 159,671.6)          | 129,057.8<br>(126,281.0 to 131,955.4)          |
| Hypertensive heart disease                    | 28,066.4<br>(25,645.7 to 30,628.1)                | 17,338.0<br>(15,850.6 to 18,947.5)             | 10,728.4<br>(9,706.3 to 11,924.1)              | 31,122.4<br>(28,414.0 to 33,865.3)                | 19,044.0<br>(17,384.4 to 20,791.2)             | 12,078.4<br>(10,992.5 to 13,237.8)             | 35,367.7<br>(32,494.6 to 38,286.5)                | 21,365.8<br>(19,512.9 to 23,226.3)             | 14,001.9<br>(12,767.5 to 15,371.4)             |
| Ischemic heart disease                        | 1,658,058.0<br>(1,523,024.4 to 1,806,351.5)       | 803,107.7<br>(732,144.9 to 887,384.3)          | 854,950.6<br>(787,452.3 to 927,429.4)          | 1,775,790.9<br>(1,630,658.1 to 1,940,581.0)       | 852,525.9<br>(774,362.1 to 940,442.9)          | 923,275.0<br>(845,834.5 to 1,008,821.8)        | 1,999,856.4<br>(1,792,534.2 to 2,148,359.8)       | 938,381.2<br>(850,809.1 to 1,037,029.3)        | 1,021,475.3<br>(934,886.1 to 1,103,020.9)      |
| Ischemic stroke                               | 294,329.9<br>(288,015.3 to 301,099.4)             | 159,797.3<br>(156,299.8 to 163,611.7)          | 134,532.6<br>(131,374.2 to 137,803.7)          | 304,947.2<br>(298,598.1 to 311,348.8)             | 166,013.6<br>(162,472.8 to 169,666.0)          | 138,933.8<br>(136,168.3 to 142,073.6)          | 344,971.7<br>(337,341.1 to 353,208.7)             | 189,936.2<br>(185,552.8 to 194,748.6)          | 155,040.5<br>(151,403.7 to 159,069.8)          |
| Other cardiovascular and circulatory diseases | 176,108.1<br>(162,364.3 to 190,965.5)             | 68,283.3<br>(63,057.8 to 74,075.3)             | 107,824.8<br>(98,848.4 to 117,408.2)           | 193,614.4<br>(178,832.1 to 210,475.9)             | 74,540.4<br>(68,816.1 to 81,058.7)             | 119,074.0<br>(108,851.7 to 130,095.8)          | 221,637.7<br>(203,309.4 to 240,228.9)             | 85,358.2<br>(78,339.5 to 92,507.4)             | 136,279.6<br>(123,820.7 to 149,069.7)          |
| Peripheral artery disease                     | 1,323,910.8<br>(1,156,238.4 to 1,527,332.3)       | 748,607.1<br>(654,687.1 to 862,372.9)          | 575,303.7<br>(500,728.7 to 668,628.6)          | 1,469,635.9<br>(1,284,834.6 to 1,688,273.5)       | 829,329.7<br>(727,655.3 to 952,274.5)          | 640,304.2<br>(559,783.3 to 738,420.4)          | 1,691,612.6<br>(1,488,889.6 to 1,932,672.0)       | 953,780.4<br>(838,410.1 to 1,091,304.5)        | 737,824.4<br>(644,900.0 to 848,175.2)          |
| <b>Eastern Europe</b>                         |                                                   |                                                |                                                |                                                   |                                                |                                                |                                                   |                                                |                                                |
| Atrial fibrillation and flutter               | 1,624,497.1<br>(1,414,970.8 to 1,854,535.8)       | 877,933.1<br>(751,495.9 to 1,022,555.0)        | 746,564.0<br>(638,308.8 to 858,200.7)          | 1,669,700.7<br>(1,458,659.6 to 1,916,302.2)       | 898,699.4<br>(771,684.4 to 1,047,731.3)        | 771,001.3<br>(666,904.8 to 886,483.4)          | 1,892,536.4<br>(1,652,447.8 to 2,163,648.9)       | 1,020,943.2<br>(879,316.5 to 1,186,633.5)      | 871,591.1<br>(753,993.3 to 1,000,673.0)        |
| Cardiomyopathy and myocarditis                | 85,984.5<br>(79,607.9 to 92,714.5)                | 44,844.1<br>(40,892.0 to 48,422.5)             | 41,140.4<br>(37,754.2 to 45,403.6)             | 96,679.0<br>(88,690.3 to 104,892.0)               | 49,220.0<br>(44,577.5 to 53,908.1)             | 47,459.0<br>(43,026.0 to 52,488.5)             | 111,937.9<br>(102,650.8 to 121,770.3)             | 58,516.7<br>(53,290.3 to 64,008.6)             | 53,421.2<br>(47,964.8 to 59,075.0)             |
| Endocarditis                                  | 1,963.8<br>(1,880.4 to 2,047.2)                   | 1,141.1<br>(1,083.2 to 1,199.9)                | 822.6<br>(785.0 to 858.3)                      | 2,117.1<br>(2,019.5 to 2,216.6)                   | 1,214.7<br>(1,150.3 to 1,282.5)                | 902.4<br>(860.5 to 943.8)                      | 2,326.6<br>(2,205.9 to 2,467.5)                   | 1,347.5<br>(1,263.6 to 1,446.5)                | 979.1<br>(931.4 to 1,028.7)                    |
| Hemorrhagic and other stroke                  | 1,073,232.3<br>(1,046,977.4 to 1,099,432.8)       | 648,250.3<br>(632,183.9 to 664,838.7)          | 424,982.0<br>(411,800.5 to 437,705.2)          | 1,036,524.6<br>(1,012,708.9 to 1,061,811.7)       | 526,524.6<br>(509,392.1 to 549,638.5)          | 509,797.6<br>(491,270.1 to 525,525.6)          | 1,120,261.4<br>(1,103,083.5 to 1,156,455.2)       | 683,093.6<br>(666,554.2 to 701,155.4)          | 446,167.8<br>(433,515.1 to 459,717.3)          |
| Hypertensive heart disease                    | 76,445.7<br>(69,047.2 to 84,897.1)                | 58,808.4<br>(52,819.1 to 65,852.1)             | 17,637.3<br>(15,835.9 to 19,685.1)             | 61,766.6<br>(55,303.5 to 69,692.7)                | 31,057.8<br>(28,141.1 to 34,574.5)             | 30,390.9<br>(28,180.2 to 32,558.5)             | 70,907.0<br>(66,353.7 to 107,102.1)               | 31,517.0<br>(29,192.9 to 33,842.2)             | 24,824.7<br>(21,972.0 to 27,322.8)             |
| Ischemic heart disease                        | 12,490,256.5<br>(11,522,480.2 to 13,460,872.5)    | 5,695,991.5<br>(5,212,995.1 to 6,178,309.5)    | 6,794,265.1<br>(6,231,520.3 to 7,396,455.3)    | 13,692,519.9<br>(12,824,819.4 to 15,361,015.4)    | 5,609,971.6<br>(5,115,427.1 to 6,103,199.1)    | 6,668,485.4<br>(6,091,942.4 to 7,305,242.8)    | 13,228,659.4<br>(12,169,855.1 to 14,388,730.6)    | 6,092,839.4<br>(5,547,898.3 to 6,669,666.9)    | 7,135,854.8<br>(6,530,196.0 to 7,789,222.5)    |
| Ischemic stroke                               | 1,847,535.3<br>(1,797,199.4 to 1,902,240.1)       | 1,145,234.7<br>(1,112,908.8 to 1,179,563.3)    | 702,300.6<br>(677,630.7 to 727,238.0)          | 1,766,923.9<br>(1,721,823.6 to 1,819,199.5)       | 1,093,689.1<br>(1,064,000.0 to 1,125,702.9)    | 673,234.8<br>(651,022.1 to 696,238.1)          | 1,939,625.7<br>(1,886,397.2 to 1,993,437.3)       | 1,201,816.7<br>(1,169,099.8 to 1,236,376.0)    | 737,808.9<br>(713,335.6 to 763,065.6)          |
| Other cardiovascular and circulatory diseases | 668,652.7<br>(622,279.6 to 736,610.2)             | 421,647.3<br>(377,161.7 to 469,598.0)          | 247,005.4<br>(220,407.7 to 278,931.7)          | 722,216.1<br>(645,228.6 to 802,733.0)             | 430,394.1<br>(383,172.7 to 477,330.6)          | 291,912.0<br>(257,672.2 to 329,508.4)          | 828,365.0<br>(741,867.6 to 923,566.2)             | 490,466.4<br>(455,573.5 to 549,629.2)          | 337,718.4<br>(294,862.5 to 382,464.4)          |
| Peripheral artery disease                     | 7,682,655.8<br>(6,674,276.6 to 8,854,735.1)       | 4,926,694.8<br>(4,300,106.6 to 5,664,065.0)    | 2,755,960.9<br>(2,394,298.4 to 3,192,506.7)    | 8,084,822.2<br>(7,064,255.0 to 9,335,234.5)       | 5,223,229.3<br>(4,562,939.6 to 6,003,015.6)    | 2,861,653.1<br>(2,500,593.9 to 3,301,146.0)    | 9,324,997.5<br>(8,157,323.3 to 10,652,514.7)      | 5,987,518.7<br>(5,232,082.0 to 6,839,527.4)    | 3,337,478.7<br>(2,915,576.0 to 3,841,688.3)    |
| <b>Central Europe</b>                         |                                                   |                                                |                                                |                                                   |                                                |                                                |                                                   |                                                |                                                |
| Atrial fibrillation and flutter               | 1,163,921.5<br>(1,090,765.0 to 1,245,953.6)       | 586,076.8<br>(539,624.1 to 634,993.1)          | 577,844.7<br>(545,539.3 to 614,287.4)          | 1,255,874.9<br>(1,178,319.9 to 1,343,985.4)       | 630,479.5<br>(582,077.0 to 682,202.8)          | 625,395.4<br>(592,354.7 to 663,129.0)          | 1,362,096.7<br>(1,275,488.2 to 1,461,917.3)       | 681,321.2<br>(628,088.0 to 742,150.7)          | 680,775.5<br>(642,637.8 to 721,842.4)          |
| Cardiomyopathy and myocarditis                | 68,895.0<br>(64,321.7 to 73,284.2)                | 38,658.0<br>(35,851.4 to 41,309.3)             | 30,237.0<br>(28,140.9 to 32,309.6)             | 76,807.5<br>(71,561.7 to 82,112.6)                | 43,607.0<br>(40,217.0 to 46,993.5)             | 33,200.5<br>(30,873.5 to 35,511.8)             | 85,196.7<br>(79,157.0 to 91,509.7)                | 48,791.1<br>(44,723.8 to 52,853.4)             | 36,405.6<br>(33,816.4 to 39,082.0)             |
| Endocarditis                                  | 1,063.7<br>(1,021.6 to 1,107.0)                   | 308.9<br>(291.8 to 326.3)                      | 756.8<br>(724.6 to 788.7)                      | 1,141.9<br>(1,095.2 to 1,187.0)                   | 313.7<br>(295.5 to 332.5)                      | 828.2<br>(792.2 to 865.3)                      | 1,181.8<br>(1,127.7 to 1,236.7)                   | 314.5<br>(294.4 to 335.7)                      | 867.3<br>(824.6 to 914.3)                      |
| Hemorrhagic and other stroke                  | 473,886.3<br>(464,341.3 to 484,805.3)             | 272,605.3<br>(266,386.5 to 279,421.7)          | 201,281.1<br>(196,675.0 to 206,157.6)          | 460,247.2<br>(450,945.6 to 471,111.7)             | 264,113.0<br>(257,901.0 to 270,031.6)          | 196,134.2<br>(191,772.0 to 200,605.0)          | 482,419.9<br>(470,995.2 to 495,973.3)             | 278,485.6<br>(271,065.6 to 287,367.1)          | 203,934.3<br>(199,088.3 to 209,297.1)          |
| Hypertensive heart disease                    | 75,882.1<br>(70,869.0 to 81,762.9)                | 41,149.7<br>(39,000.0 to 43,777.3)             | 34,732.4<br>(32,830.0 to 36,181.3)             | 83,853.7<br>(78,005.5 to 89,134.3)                | 48,844.1<br>(45,088.8 to 52,600.0)             | 40,243.6<br>(36,757.3 to 44,770.3)             | 98,178.1<br>(92,678.0 to 104,238.7)               | 89,178.1<br>(80,956.4 to 97,913.3)             | 44,733.1<br>(40,609.5 to 48,989.0)             |
| Is                                            |                                                   |                                                |                                                |                                                   |                                                |                                                |                                                   |                                                |                                                |



|                                               |                                             |                                             |                                             |                                             |                                             |                                             |                                             |                                             |                                             |
|-----------------------------------------------|---------------------------------------------|---------------------------------------------|---------------------------------------------|---------------------------------------------|---------------------------------------------|---------------------------------------------|---------------------------------------------|---------------------------------------------|---------------------------------------------|
| Peripheral artery disease                     | 689,896.0<br>(606,946.7 to 790,159.4)       | 329,959.0<br>(290,157.6 to 379,094.4)       | 359,937.0<br>(314,716.4 to 418,138.4)       | 788,728.4<br>(692,680.7 to 898,903.7)       | 366,216.2<br>(323,949.0 to 419,238.0)       | 422,512.2<br>(369,104.2 to 483,244.3)       | 851,902.6<br>(746,754.2 to 970,531.0)       | 402,377.1<br>(352,607.9 to 459,923.5)       | 449,525.5<br>(391,594.0 to 515,915.2)       |
| <b>Southern Latin America</b>                 |                                             |                                             |                                             |                                             |                                             |                                             |                                             |                                             |                                             |
| Atrial fibrillation and flutter               | 293,368.9<br>(255,452.5 to 336,990.4)       | 107,408.5<br>(92,577.1 to 125,095.3)        | 185,960.4<br>(162,082.5 to 214,053.3)       | 325,440.6<br>(283,947.7 to 373,547.8)       | 118,467.0<br>(102,169.1 to 137,876.2)       | 206,973.6<br>(179,804.0 to 236,804.1)       | 364,105.3<br>(319,444.0 to 421,316.7)       | 134,773.5<br>(116,818.2 to 157,649.5)       | 229,331.8<br>(199,034.0 to 264,200.2)       |
| Cardiomyopathy and myocarditis                | 24,571.2<br>(20,815.4 to 28,645.4)          | 16,585.8<br>(14,216.6 to 18,904.4)          | 7,985.3<br>(6,612.7 to 9,891.8)             | 27,407.6<br>(23,627.4 to 31,744.0)          | 18,380.0<br>(15,961.0 to 20,917.7)          | 9,027.7<br>(7,459.5 to 11,022.2)            | 30,880.5<br>(26,712.4 to 35,276.5)          | 20,610.1<br>(18,026.7 to 23,228.4)          | 10,270.4<br>(8,498.3 to 12,520.8)           |
| Endocarditis                                  | 4,306.8<br>(4,099.2 to 4,571.3)             | 4,249.4<br>(4,012.5 to 4,510.9)             | 57.4<br>(44.4 to 68.8)                      | 4,880.6<br>(4,595.1 to 5,192.9)             | 97.8<br>(45,915.0 to 5,116.1)               | 5,580.0<br>(66.5 to 91.8)                   | 5,344.4<br>(5,125.8 to 5,562.1)             | 95.3<br>(5,043.7 to 5,856.3)                | 95.3<br>(77.3 to 111.7)                     |
| Hemorrhagic and other stroke                  | 108,465.6<br>(106,019.2 to 111,332.9)       | 58,099.7<br>(57,283.0 to 60,265.4)          | 97,765.9<br>(84,431.4 to 151,911.0)         | 114,352.7<br>(111,581.7 to 117,393.3)       | 61,849.5<br>(60,210.8 to 63,583.4)          | 52,503.2<br>(51,230.8 to 54,014.8)          | 126,534.2<br>(122,934.0 to 130,606.6)       | 68,748.6<br>(66,762.9 to 71,057.6)          | 57,785.7<br>(56,064.3 to 59,706.0)          |
| Hypertensive heart disease                    | 49,859.5<br>(42,858.7 to 56,824.4)          | 32,150.1<br>(27,827.8 to 36,140.3)          | 17,799.3<br>(14,811.2 to 20,857.5)          | 51,271.2<br>(44,352.1 to 58,220.4)          | 33,282.7<br>(28,995.0 to 37,577.5)          | 17,988.4<br>(14,901.1 to 21,988.2)          | 57,426.4<br>(49,902.2 to 64,975.4)          | 37,137.4<br>(32,432.2 to 41,655.5)          | 30,289.1<br>(17,022.0 to 23,583.4)          |
| Ischemic heart disease                        | 411,086.5<br>(389,921.7 to 432,795.1)       | 148,344.4<br>(139,806.5 to 157,054.4)       | 262,742.1<br>(248,326.8 to 277,317.9)       | 440,593.2<br>(417,147.9 to 465,749.0)       | 163,574.4<br>(154,098.8 to 173,332.1)       | 277,018.7<br>(262,214.1 to 292,879.6)       | 488,328.7<br>(458,416.4 to 516,911.9)       | 178,842.6<br>(167,464.2 to 189,853.9)       | 309,486.1<br>(289,061.1 to 330,028.1)       |
| Ischemic stroke                               | 175,530.4<br>(171,167.8 to 180,586.1)       | 90,153.1<br>(87,908.3 to 92,736.1)          | 85,377.3<br>(82,684.6 to 88,118.9)          | 96,303.2<br>(93,595.5 to 99,315.5)          | 96,303.2<br>(93,595.5 to 99,315.5)          | 89,498.4<br>(87,058.4 to 92,131.5)          | 206,766.9<br>(200,751.0 to 213,651.0)       | 107,942.4<br>(104,637.9 to 111,837.5)       | 98,824.5<br>(95,588.6 to 102,483.1)         |
| Other cardiovascular and circulatory diseases | 327,386.1<br>(418,004.1 to 661,690.6)       | 259,620.1<br>(253,687.0 to 400,567.1)       | 206,672.6<br>(161,344.4 to 265,509.2)       | 565,257.9<br>(446,754.2 to 691,888.4)       | 339,144.1<br>(265,989.2 to 408,833.1)       | 226,113.8<br>(176,661.4 to 287,037.7)       | 626,856.1<br>(507,532.4 to 754,024.9)       | 373,423.8<br>(301,074.9 to 444,747.1)       | 253,432.3<br>(201,178.8 to 312,104.5)       |
| Peripheral artery disease                     | 1,089,264.0<br>(954,469.5 to 1,238,883.9)   | 599,620.1<br>(525,393.4 to 684,401.4)       | 489,643.9<br>(428,537.4 to 562,625.8)       | 1,222,263.0<br>(1,076,903.5 to 1,394,184.3) | 671,789.8<br>(590,558.2 to 768,288.9)       | 550,473.2<br>(480,058.8 to 633,926.9)       | 1,336,794.1<br>(1,181,289.8 to 1,530,375.8) | 749,046.6<br>(659,895.3 to 879,966.5)       | 587,747.5<br>(513,484.1 to 681,090.2)       |
| <b>Andean Latin America</b>                   |                                             |                                             |                                             |                                             |                                             |                                             |                                             |                                             |                                             |
| Atrial fibrillation and flutter               | 87,877.0<br>(76,242.2 to 101,453.2)         | 34,324.9<br>(29,380.0 to 40,002.1)          | 53,552.0<br>(46,127.3 to 61,818.3)          | 104,475.5<br>(90,209.0 to 121,302.2)        | 40,930.3<br>(35,309.1 to 47,712.3)          | 63,545.2<br>(54,654.0 to 73,505.6)          | 123,851.3<br>(107,182.4 to 144,577.3)       | 48,470.7<br>(41,666.7 to 56,879.6)          | 75,380.6<br>(65,230.2 to 87,391.2)          |
| Cardiomyopathy and myocarditis                | 7,599.7<br>(7,433.1 to 8,468.4)             | 4,293.4<br>(4,009.7 to 4,577.2)             | 3,666.3<br>(3,405.6 to 3,919.1)             | 9,882.3<br>(8,959.8 to 10,193.4)            | 5,268.5<br>(4,916.6 to 5,610.0)             | 4,313.8<br>(4,006.4 to 4,623.8)             | 11,499.9<br>(10,704.5 to 12,174.0)          | 6,286.9<br>(5,847.8 to 6,708.2)             | 5,163.0<br>(4,805.4 to 5,508.1)             |
| Endocarditis                                  | 115.8<br>(105.6 to 126.4)                   | 96.2<br>(90.8 to 101.6)                     | 19.6<br>(12.4 to 26.9)                      | 131.5<br>(120.2 to 143.1)                   | 108.2<br>(102.4 to 114.1)                   | 23.3<br>(15.2 to 30.8)                      | 205.8<br>(192.8 to 218.6)                   | 132.9<br>(125.6 to 140.4)                   | 72.9<br>(65.5 to 80.4)                      |
| Hemorrhagic and other stroke                  | 65,025.5<br>(63,283.4 to 66,946.6)          | 35,364.1<br>(34,363.9 to 36,491.5)          | 29,664.4<br>(28,757.1 to 30,557.4)          | 72,390.0<br>(70,354.3 to 74,354.0)          | 49,303.3<br>(38,118.9 to 60,483.3)          | 33,000.7<br>(32,082.5 to 34,946.5)          | 82,247.7<br>(79,877.5 to 84,630.8)          | 44,824.1<br>(43,467.5 to 46,162.4)          | 37,423.6<br>(36,298.2 to 38,587.9)          |
| Hypertensive heart disease                    | 19,417.5<br>(17,735.6 to 21,022.4)          | 7,992.7<br>(10,379.5 to 12,378.6)           | 23,624.0<br>(27,449.8 to 8,689.4)           | 13,971.4<br>(12,743.1 to 15,204.0)          | 9,652.6<br>(8,775.3 to 10,524.9)            | 29,363.2<br>(26,900.7 to 31,740.3)          | 17,250.1<br>(15,758.6 to 18,665.5)          | 12,111.1<br>(11,073.5 to 13,187.6)          | 12,111.1<br>(11,073.5 to 13,187.6)          |
| Ischemic heart disease                        | 305,840.0<br>(276,692.6 to 340,165.6)       | 133,851.6<br>(121,355.9 to 149,399.8)       | 171,988.4<br>(154,994.5 to 192,020.9)       | 373,480.0<br>(337,340.8 to 415,897.1)       | 165,022.8<br>(149,084.9 to 183,823.1)       | 208,457.1<br>(186,686.4 to 232,571.4)       | 433,738.2<br>(392,678.6 to 480,934.9)       | 191,058.4<br>(172,479.1 to 211,736.5)       | 242,319.8<br>(218,848.4 to 270,674.4)       |
| Ischemic stroke                               | 135,431.1<br>(53,509.6 to 56,587.7)         | 68,488.0<br>(27,603.0 to 29,347.4)          | 28,488.1<br>(27,603.0 to 29,347.4)          | 26,540.0<br>(25,837.5 to 27,399.8)          | 31,880.7<br>(29,752.5 to 32,771.4)          | 29,463.2<br>(28,629.0 to 30,367.8)          | 72,049.4<br>(69,967.0 to 74,245.3)          | 37,423.8<br>(36,413.2 to 38,743.7)          | 34,502.5<br>(33,921.0 to 35,998.8)          |
| Other cardiovascular and circulatory diseases | 420,283.4<br>(375,111.0 to 489,694.8)       | 142,638.0<br>(123,464.5 to 171,115.7)       | 287,645.4<br>(244,831.1 to 335,005.7)       | 497,345.2<br>(417,033.1 to 543,034.0)       | 101,744.9<br>(141,071.4 to 191,578.2)       | 315,008.1<br>(270,402.6 to 363,363.1)       | 191,559.9<br>(499,509.3 to 635,994.6)       | 191,559.9<br>(167,739.6 to 222,981.6)       | 371,702.8<br>(321,324.3 to 427,089.7)       |
| Peripheral artery disease                     | 970,851.7<br>(852,664.0 to 1,111,136.1)     | 492,212.7<br>(434,458.7 to 564,970.2)       | 477,639.0<br>(417,887.2 to 548,184.6)       | 1,155,849.9<br>(1,014,634.0 to 1,321,243.1) | 588,235.2<br>(513,243.7 to 673,929.3)       | 467,640.6<br>(406,129.5 to 649,242.3)       | 1,377,704.3<br>(1,207,690.9 to 1,583,156.1) | 700,187.1<br>(618,149.0 to 801,656.7)       | 677,517.2<br>(591,455.6 to 779,740.3)       |
| <b>Central Latin America</b>                  |                                             |                                             |                                             |                                             |                                             |                                             |                                             |                                             |                                             |
| Atrial fibrillation and flutter               | 366,968.4<br>(316,660.5 to 424,441.9)       | 146,638.3<br>(126,793.3 to 169,872.2)       | 220,330.1<br>(189,869.7 to 254,425.1)       | 441,321.2<br>(382,121.9 to 510,621.1)       | 176,453.8<br>(152,402.3 to 205,662.7)       | 264,867.4<br>(228,856.0 to 307,690.7)       | 530,195.9<br>(458,596.0 to 613,108.9)       | 210,074.1<br>(181,252.0 to 243,719.7)       | 330,121.9<br>(276,550.2 to 369,690.0)       |
| Cardiomyopathy and myocarditis                | 99,854.2<br>(56,465.7 to 63,124.1)          | 31,658.5<br>(29,844.1 to 33,328.7)          | 28,195.7<br>(26,453.9 to 30,006.7)          | 69,675.6<br>(65,736.4 to 73,533.5)          | 37,272.4<br>(35,164.0 to 39,201.6)          | 32,403.3<br>(30,445.0 to 34,956.5)          | 81,739.6<br>(76,977.5 to 86,246.1)          | 43,646.6<br>(41,214.3 to 45,880.8)          | 38,093.0<br>(35,582.6 to 40,678.4)          |
| Endocarditis                                  | 1,419.9<br>(1,295.4 to 1,565.9)             | 955.5<br>(869.7 to 1,063.6)                 | 464.3<br>(421.1 to 511.7)                   | 1,642.6<br>(1,494.6 to 1,813.4)             | 1,098.0<br>(999.4 to 1,215.6)               | 544.2<br>(493.8 to 599.2)                   | 2,051.7<br>(1,888.9 to 2,237.6)             | 1,298.7<br>(1,185.1 to 1,434.7)             | 753.0<br>(697.6 to 815.8)                   |
| Hemorrhagic and other stroke                  | 138,887.4<br>(134,099.3 to 144,290.0)       | 72,942.8<br>(70,438.2 to 75,718.5)          | 65,944.6<br>(63,661.6 to 68,523.3)          | 156,146.4<br>(150,862.6 to 162,167.7)       | 81,377.1<br>(78,500.7 to 84,540.7)          | 74,769.3<br>(72,205.0 to 77,613.4)          | 180,288.1<br>(173,791.6 to 187,228.9)       | 93,592.2<br>(90,154.9 to 97,386.7)          | 86,675.9<br>(83,669.7 to 90,019.4)          |
| Hypertensive heart disease                    | 135,431.1<br>(124,769.6 to 145,832.2)       | 83,228.2<br>(76,865.0 to 89,384.2)          | 52,202.8<br>(47,946.2 to 56,730.8)          | 167,107.0<br>(154,256.6 to 179,966.4)       | 102,559.6<br>(94,862.0 to 110,098.5)        | 64,077.4<br>(59,320.6 to 70,145.9)          | 209,498.6<br>(193,853.2 to 224,617.1)       | 127,051.2<br>(117,899.1 to 136,115.7)       | 82,447.5<br>(75,737.3 to 88,923.2)          |
| Ischemic heart disease                        | 1,886,833.5<br>(1,719,481.2 to 2,084,833.4) | 903,404.5<br>(823,631.7 to 998,635.0)       | 893,229.0<br>(892,994.5 to 1,084,119.7)     | 1,289,099.4<br>(2,086,252.9 to 2,520,381.8) | 1,105,220.7<br>(941,879.0 to 1,217,790.7)   | 1,183,379.7<br>(1,077,578.4 to 1,303,931.0) | 2,743,457.6<br>(2,506,477.3 to 3,022,603.8) | 1,311,991.4<br>(1,201,624.5 to 1,444,890.3) | 1,428,466.4<br>(1,302,989.5 to 1,579,647.7) |
| Ischemic stroke                               | 147,177.9<br>(142,580.8 to 152,261.2)       | 75,019.7<br>(72,669.0 to 77,636.3)          | 72,188.2<br>(69,850.3 to 74,722.7)          | 164,735.4<br>(159,219.2 to 170,542.5)       | 83,901.6<br>(81,049.0 to 86,906.8)          | 80,833.8<br>(78,208.4 to 83,724.6)          | 194,156.6<br>(187,314.1 to 201,434.8)       | 99,011.7<br>(95,566.4 to 102,898.4)         | 95,144.9<br>(91,834.7 to 98,817.1)          |
| Other cardiovascular and circulatory diseases | 2,285,575.6<br>(2,097,811.5 to 2,486,456.8) | 1,057,447.2<br>(967,544.3 to 1,157,648.0)   | 1,228,128.2<br>(1,100,380.4 to 1,360,036.7) | 2,682,471.2<br>(2,462,632.1 to 2,907,877.2) | 1,266,860.6<br>(1,158,978.9 to 1,381,090.3) | 1,415,611.0<br>(1,277,136.7 to 1,560,582.2) | 3,182,497.3<br>(2,931,300.6 to 3,437,585.3) | 1,522,022.0<br>(1,404,341.6 to 1,650,234.7) | 1,660,475.4<br>(1,497,897.9 to 1,835,318.7) |
| Peripheral artery disease                     | 4,031,001.4<br>(3,549,438.4 to 4,626,165.4) | 2,107,155.8<br>(1,855,744.4 to 2,411,801.7) | 1,923,845.5<br>(1,688,994.1 to 2,214,130.4) | 4,893,194.4<br>(4,311,765.0 to 5,599,466.6) | 2,550,857.9<br>(2,248,874.7 to 2,923,270.4) | 2,342,336.5<br>(2,060,733.4 to 2,693,791.9) | 5,908,612.7<br>(5,203,027.2 to 6,768,661.1) | 3,064,958.8<br>(2,703,342.9 to 3,505,126.5) | 2,843,654.1<br>(2,502,606.9 to 3,275,487.5) |
| <b>Tropical Latin America</b>                 |                                             |                                             |                                             |                                             |                                             |                                             |                                             |                                             |                                             |
| Atrial fibrillation and flutter               | 372,071.7<br>(321,556.7 to 423,215.8)       | 155,883.8<br>(135,094.1 to 180,662.2)       | 216,187.8<br>(185,880.3 to 251,031.8)       | 453,302.3<br>(390,567.4 to 524,287.1)       | 190,147.3<br>(164,790.8 to 220,176.6)       | 263,155.0<br>(226,020.3 to 305,198.2)       | 548,366.4<br>(474,093.3 to 635,161.4)       | 229,661.6<br>(198,627.2 to 266,418.3)       | 318,700.2<br>(275,359.8 to 369,906.2)       |
| Cardiomyopathy and myocarditis                | 158,988.9<br>(148,468.3 to 168,807.2)       | 78,520.3<br>(74,307.9 to 82,688.6)          | 90,468.7<br>(73,877.0 to 86,615.1)          | 162,979.0<br>(152,762.0 to 172,383.1)       | 80,902.6<br>(76,731.3 to 85,105.5)          | 82,076.7<br>(75,908.3 to 87,699.4)          | 183,249.4<br>(173,249.7 to 193,698.3)       | 91,516.6<br>(86,755.2 to 96,475.7)          | 91,732.8<br>(85,785.3 to 97,599.5)          |
| Endocarditis                                  | 1,023.3<br>(1,124.4 to 2,270.8)             | 933.3<br>(777.9 to 1,121.6)                 | 1,089.0<br>(940.2 to 1,264.5)               | 1,982.0<br>(1,712.1 to 2,299.6)             | 1,926.7<br>(870.7 to 1,106.4)               | 1,055.5<br>(917.1 to 1,218.9)               | 2,194.5<br>(1,894.4 to 2,540.8)             | 1,034.4<br>(869.5 to 1,223.5)               | 1,169.1<br>(1,009.4 to 1,341.3)             |
| Hemorrhagic and other stroke                  | 236,944.2<br>(227,157.0 to 247,787.0)       | 122,368.4<br>(117,437.0 to 128,185.4)       | 114,575.8<br>(109,671.0 to 119,873.6)       | 253,789.3<br>(242,984.2 to 265,471.5)       | 130,157.5<br>(124,549.8 to 136,143.9)       | 130,157.5<br>(118,281.0 to 129,508.5)       | 292,725.0<br>(279,182.0 to 307,749.3)       | 149,530.8<br>(142,630.8 to 157,232.2)       | 143,194.2<br>(136,362.3 to 150,569.8)       |
| Hypertensive heart disease                    | 226,919.0<br>(211,292.0 to 242,290.0)       | 130,114.9<br>(121,856.0 to 138,936.0)       | 96,804.0<br>(89,777.1 to 103,881.5)         | 232,259.2<br>(214,828.2 to 246,079.4)       | 132,259.2<br>(123,584.0 to 141,115.9)       | 98,141.1<br>(90,640.1 to 105,390.4)         | 266,990.0<br>(249,602.3 to 284,581.8)       | 152,489.7<br>(142,795.5 to 162,576.4)       | 114,500.3<br>(106,381.5 to 122,544.8)       |
| Ischemic heart disease                        | 2,569,163.3<br>(2,345,124.7 to 2,823,549.0) | 1,042,071.3<br>(959,530.1 to 1,137,623.7)   | 1,527,091.1<br>(1,383,728.1 to 1,693,474.8) | 2,977,680.0<br>(2,712,929.2 to 3,279,964.7) | 1,212,094.7<br>(1,115,002.1 to 1,327,640.6) | 1,765,585.2<br>(1,598,476.0 to 1,963,113.9) | 3,480,147.6<br>(3,199,511.8 to 3,841,271.2) | 1,414,322.5<br>(1,296,128.5 to 1,549,720.9) | 2,605,824.9<br>(1,858,217.9 to 2,300,500.2) |
| Ischemic stroke                               | 281,214.1<br>(269,469.2 to 295,330.8)       | 136,505.9<br>(131,059.1 to 143,172.0)       | 144,708.1<br>(138,267.6 to 152,031.6)       | 299,939.1<br>(286,747.0 to 314,563.6)       | 154,368.2<br>(139,249.1 to 155,802.2)       | 154,368.2<br>(147,507.5 to 161,917.3)       | 356,275.1<br>(338,561.1 to 375,657.6)       | 172,946.2<br>(164,865.8 to 182,222.4)       | 183,328.9<br>(173,927.0 to 194,059.0)       |
| Other cardiovascular and circulatory diseases | 1,921,454.5<br>(4,040,177.3 to 4,734,851.9) | 4,247,829.5<br>(1,765,566.8 to 2,101,200.5) | 4,247,829.                                  |                                             |                                             |                                             |                                             |                                             |                                             |



|                                               |                                                |                                              |                                               |                                                |                                               |                                                |                                                |                                                |                                                |
|-----------------------------------------------|------------------------------------------------|----------------------------------------------|-----------------------------------------------|------------------------------------------------|-----------------------------------------------|------------------------------------------------|------------------------------------------------|------------------------------------------------|------------------------------------------------|
| Atrial fibrillation and flutter               | 2,867,895.7<br>(2,485,293.9 to 3,307,081.6)    | 1,049,519.9<br>(907,249.5 to 1,220,337.4)    | 1,818,375.7<br>(1,574,181.7 to 2,094,766.2)   | 3,334,644.4<br>(2,891,178.1 to 3,848,292.2)    | 1,224,910.7<br>(1,058,642.3 to 1,428,025.7)   | 2,109,733.6<br>(1,824,688.3 to 2,434,480.2)    | 3,899,286.2<br>(3,383,780.9 to 4,502,320.2)    | 1,437,237.4<br>(1,241,312.7 to 1,676,858.9)    | 2,462,048.9<br>(2,130,450.0 to 2,842,157.2)    |
| Cardiomyopathy and myocarditis                | 119,301.2<br>(113,079.3 to 125,761.0)          | 63,537.2<br>(60,314.8 to 66,848.8)           | 55,764.0<br>(52,596.1 to 59,038.8)            | 132,952.5<br>(126,356.0 to 139,758.3)          | 71,085.2<br>(67,453.1 to 74,632.3)            | 61,952.3<br>(58,509.3 to 65,515.5)             | 149,407.8<br>(141,717.6 to 156,673.9)          | 80,272.2<br>(76,385.6 to 84,302.8)             | 69,135.6<br>(65,033.4 to 73,054.6)             |
| Endocarditis                                  | 8,568.6<br>(7,626.0 to 9,681.0)                | 4,649.2<br>(4,105.7 to 5,320.8)              | 3,919.4<br>(3,506.0 to 4,388.0)               | 9,893.5<br>(8,851.9 to 11,124.5)               | 5,342.7<br>(4,727.5 to 6,097.1)               | 4,550.7<br>(4,094.8 to 5,090.5)                | 11,446.2<br>(10,212.5 to 12,929.9)             | 6,189.3<br>(5,499.8 to 7,084.7)                | 5,256.9<br>(4,708.3 to 5,854.6)                |
| Hemorrhagic and other stroke                  | 3,144,590.0<br>(3,070,813.8 to 3,225,303.4)    | 1,398,839.4<br>(1,363,227.5 to 1,438,080.3)  | 1,745,750.5<br>(1,707,367.8 to 1,789,906.2)   | 3,514,672.5<br>(3,432,997.7 to 3,601,953.2)    | 1,336,560.0<br>(1,497,713.7 to 1,578,291.7)   | 1,978,312.5<br>(1,934,132.2 to 2,026,071.8)    | 3,970,982.9<br>(3,865,438.7 to 4,086,074.8)    | 1,734,618.5<br>(1,687,573.7 to 1,786,687.6)    | 2,236,364.4<br>(2,178,288.4 to 2,300,243.9)    |
| Hypertensive heart disease                    | 796,310.6<br>(753,980.9 to 840,721.7)          | 496,825.5<br>(384,751.4 to 428,967.8)        | 389,385.1<br>(368,856.2 to 411,794.2)         | 889,322.9<br>(899,322.9 to 997,882.7)          | 484,820.0<br>(460,372.4 to 511,423.9)         | 463,332.2<br>(438,091.0 to 488,316.9)          | 1,140,677.8<br>(1,080,621.1 to 1,201,527.5)    | 585,749.0<br>(554,736.0 to 616,794.7)          | 554,928.8<br>(524,813.0 to 585,661.6)          |
| Ischemic heart disease                        | 17,353,210.8<br>(15,704,431.8 to 19,265,629.0) | 6,517,477.2<br>(5,883,010.3 to 7,217,242.8)  | 10,835,732.8<br>(9,790,261.7 to 12,102,663.1) | 19,721,206.6<br>(17,776,177.5 to 21,899,698.1) | 7,473,627.6<br>(6,745,155.2 to 8,292,088.8)   | 12,347,572.7<br>(11,007,781.3 to 13,606,617.6) | 23,148,017.9<br>(20,930,974.9 to 25,698,774.3) | 8,781,643.9<br>(7,924,912.9 to 9,746,862.8)    | 14,366,374.0<br>(12,946,828.9 to 16,030,805.5) |
| Ischemic stroke                               | 3,177,846.5<br>(3,100,065.3 to 3,256,822.9)    | 1,409,337.4<br>(1,372,606.0 to 1,447,231.6)  | 1,768,908.9<br>(1,724,654.8 to 1,810,810.3)   | 3,544,016.2<br>(3,462,387.1 to 3,627,913.7)    | 1,561,069.4<br>(1,521,842.2 to 1,602,157.7)   | 1,982,946.7<br>(1,938,652.0 to 2,029,096.6)    | 3,932,150.6<br>(3,831,984.1 to 4,047,703.7)    | 1,714,307.5<br>(1,667,742.0 to 1,765,752.9)    | 2,217,843.1<br>(2,160,750.3 to 2,281,985.0)    |
| Other cardiovascular and circulatory diseases | 529,083.0<br>(495,202.0 to 563,776.1)          | 215,092.8<br>(200,928.8 to 229,985.1)        | 313,990.2<br>(292,848.5 to 335,476.0)         | 623,819.3<br>(581,782.6 to 666,613.1)          | 253,337.1<br>(236,825.2 to 270,121.3)         | 370,482.2<br>(344,927.5 to 397,773.8)          | 748,799.9<br>(702,412.5 to 795,361.1)          | 306,804.7<br>(287,469.9 to 326,580.2)          | 441,995.2<br>(413,903.4 to 471,719.7)          |
| Peripheral artery disease                     | 18,082,303.0<br>(15,782,947.0 to 20,873,335.7) | 8,912,317.3<br>(7,786,443.6 to 10,272,816.6) | 9,169,984.8<br>(8,009,813.0 to 10,603,451.7)  | 21,228,968.0<br>(18,551,947.1 to 24,513,155.0) | 10,469,307.8<br>(9,148,362.9 to 12,098,000.4) | 17,699,660.0<br>(15,903,324.3 to 19,439,110.3) | 25,029,463.1<br>(21,873,760.4 to 28,854,783.4) | 12,381,089.2<br>(10,814,329.9 to 14,239,217.5) | 12,648,574.1<br>(11,042,894.3 to 14,563,975.0) |
| <b>North Africa and Middle East</b>           |                                                |                                              |                                               |                                                |                                               |                                                |                                                |                                                |                                                |
| Atrial fibrillation and flutter               | 694,514.1<br>(598,682.7 to 800,930.9)          | 275,739.3<br>(237,858.0 to 321,938.7)        | 418,774.8<br>(360,454.7 to 484,319.5)         | 807,801.1<br>(697,004.2 to 933,620.0)          | 320,270.6<br>(276,208.3 to 372,742.8)         | 487,530.5<br>(420,123.0 to 564,818.2)          | 951,377.2<br>(823,275.9 to 1,100,396.5)        | 376,268.2<br>(324,735.9 to 440,395.3)          | 575,109.0<br>(497,317.1 to 667,921.6)          |
| Cardiomyopathy and myocarditis                | 121,879.5<br>(115,613.3 to 128,344.1)          | 59,647.6<br>(56,373.6 to 62,906.2)           | 62,231.9<br>(58,784.7 to 65,691.3)            | 141,591.0<br>(134,373.2 to 149,033.5)          | 69,272.6<br>(65,596.5 to 72,920.1)            | 72,318.4<br>(68,463.7 to 76,399.7)             | 165,560.6<br>(156,966.1 to 174,151.4)          | 81,292.8<br>(77,146.8 to 86,021.3)             | 83,967.8<br>(79,455.7 to 88,527.9)             |
| Endocarditis                                  | 12,862.2<br>(12,375.4 to 13,296.9)             | 11,747.0<br>(11,310.1 to 12,198.2)           | 1,089.2<br>(1,027.5 to 1,154.4)               | 15,262.7<br>(14,697.2 to 15,813.6)             | 14,083.3<br>(13,470.9 to 14,571.7)            | 1,254.4<br>(1,181.5 to 1,328.6)                | 18,210.0<br>(17,438.9 to 19,015.2)             | 16,785.3<br>(16,057.5 to 17,570.6)             | 1,424.7<br>(1,331.5 to 1,517.9)                |
| Hemorrhagic and other stroke                  | 834,200.9<br>(816,978.4 to 852,721.3)          | 451,860.3<br>(441,983.8 to 461,893.6)        | 382,340.7<br>(374,189.3 to 390,953.4)         | 955,532.5<br>(936,000.6 to 976,284.2)          | 516,608.0<br>(506,129.1 to 527,968.0)         | 438,924.0<br>(429,687.7 to 448,149.9)          | 1,093,535.3<br>(1,069,924.0 to 1,119,497.0)    | 594,476.4<br>(581,670.6 to 608,840.4)          | 499,088.6<br>(487,622.0 to 511,343.4)          |
| Hypertensive heart disease                    | 149,029.0<br>(137,760.0 to 160,657.0)          | 99,358.7<br>(91,787.5 to 107,290.3)          | 49,670.3<br>(45,660.0 to 53,795.8)            | 174,175.1<br>(161,168.4 to 187,459.5)          | 115,951.1<br>(107,503.4 to 124,649.7)         | 88,224.0<br>(83,568.0 to 92,752.9)             | 240,350.3<br>(189,297.3 to 219,313.0)          | 136,376.1<br>(126,365.4 to 146,161.7)          | 67,974.2<br>(62,733.9 to 73,135.4)             |
| Ischemic heart disease                        | 5,001,171.7<br>(4,444,833.4 to 5,641,558.5)    | 2,093,691.2<br>(1,861,579.5 to 2,369,545.4)  | 2,907,480.7<br>(2,587,341.6 to 3,289,801.9)   | 5,743,751.3<br>(5,109,714.8 to 6,499,957.5)    | 2,425,416.1<br>(2,151,550.2 to 2,757,770.0)   | 3,318,335.0<br>(2,954,401.5 to 3,747,380.9)    | 7,072,468.1<br>(6,265,905.0 to 8,007,139.8)    | 2,975,936.1<br>(2,637,853.3 to 3,378,580.4)    | 4,096,532.5<br>(3,629,716.2 to 4,639,946.7)    |
| Ischemic stroke                               | 986,764.0<br>(967,166.3 to 1,007,789.0)        | 503,699.7<br>(493,257.0 to 514,068.1)        | 483,064.3<br>(473,054.1 to 494,331.0)         | 1,126,727.8<br>(1,104,176.5 to 1,149,690.5)    | 576,911.0<br>(565,543.3 to 588,413.6)         | 549,816.8<br>(538,238.2 to 561,722.3)          | 1,312,092.9<br>(1,285,006.8 to 1,341,996.8)    | 672,113.1<br>(658,117.3 to 688,071.7)          | 639,979.9<br>(626,007.8 to 654,639.1)          |
| Other cardiovascular and circulatory diseases | 10,968,834.1<br>(10,020,888.4 to 12,024,776.4) | 4,485,425.1<br>(4,101,112.2 to 5,017,792.3)  | 6,483,409.4<br>(5,773,359.8 to 7,187,157.3)   | 11,986,363.4<br>(11,004,588.0 to 13,072,688.0) | 5,027,839.4<br>(4,623,467.5 to 5,390,714.3)   | 6,958,523.2<br>(6,249,661.3 to 7,699,793.3)    | 13,485,443.3<br>(12,438,127.7 to 14,680,520.7) | 5,743,608.7<br>(5,280,613.6 to 6,379,047.7)    | 7,741,835.4<br>(6,997,326.2 to 8,607,512.8)    |
| Peripheral artery disease                     | 6,237,256.1<br>(5,447,108.0 to 7,139,457.9)    | 3,090,545.0<br>(2,704,354.6 to 3,555,336.1)  | 3,146,711.4<br>(2,739,925.0 to 3,635,330.1)   | 7,501,564.0<br>(6,390,249.9 to 8,381,294.4)    | 3,632,239.8<br>(3,184,742.4 to 4,184,351.5)   | 3,669,330.0<br>(3,210,423.9 to 4,233,406.1)    | 8,643,399.2<br>(7,580,151.2 to 9,950,144.2)    | 4,315,431.0<br>(3,793,446.1 to 4,951,589.5)    | 4,327,988.6<br>(3,799,423.9 to 5,002,717.3)    |
| <b>Central Sub-Saharan Africa</b>             |                                                |                                              |                                               |                                                |                                               |                                                |                                                |                                                |                                                |
| Atrial fibrillation and flutter               | 73,169.3<br>(62,696.9 to 85,449.3)             | 29,270.7<br>(24,763.6 to 34,379.7)           | 43,898.6<br>(37,537.3 to 51,292.7)            | 85,735.8<br>(73,564.2 to 99,812.5)             | 34,004.4<br>(29,103.9 to 39,642.0)            | 51,734.2<br>(44,222.0 to 60,530.3)             | 101,272.7<br>(86,917.9 to 118,263.8)           | 39,788.8<br>(33,966.1 to 46,915.5)             | 61,483.9<br>(52,626.4 to 71,773.0)             |
| Cardiomyopathy and myocarditis                | 28,585.3<br>(26,719.2 to 30,706.2)             | 13,849.3<br>(12,862.9 to 14,876.6)           | 14,736.1<br>(13,684.5 to 15,839.6)            | 33,814.4<br>(31,544.5 to 36,239.5)             | 16,295.5<br>(15,172.9 to 17,560.4)            | 17,518.9<br>(16,219.0 to 18,788.8)             | 39,699.9<br>(37,102.0 to 42,470.2)             | 19,041.3<br>(17,709.9 to 20,456.5)             | 20,618.5<br>(19,213.2 to 22,157.3)             |
| Endocarditis                                  | 448.1<br>(424.4 to 471.0)                      | 261.3<br>(247.6 to 274.8)                    | 186.9<br>(176.6 to 196.9)                     | 529.4<br>(502.0 to 556.7)                      | 307.4<br>(290.8 to 323.5)                     | 222.0<br>(209.2 to 234.0)                      | 626.8<br>(589.9 to 661.5)                      | 362.7<br>(340.8 to 384.1)                      | 264.1<br>(248.4 to 279.8)                      |
| Hemorrhagic and other stroke                  | 130,345.9<br>(127,435.7 to 133,398.1)          | 54,549.3<br>(49,052.0 to 77,656.7)           | 53,009.8<br>(53,234.2 to 55,955.3)            | 88,662.3<br>(149,489.0 to 156,759.0)           | 86,623.6<br>(86,445.7 to 90,944.2)            | 64,347.6<br>(62,802.5 to 66,018.4)             | 181,821.4<br>(177,248.6 to 186,526.4)          | 105,225.7<br>(102,577.8 to 108,170.6)          | 76,595.7<br>(74,630.4 to 78,729.5)             |
| Hypertensive heart disease                    | 49,152.0<br>(45,167.3 to 53,286.2)             | 23,132.0<br>(20,952.7 to 25,332.0)           | 26,020.0<br>(23,914.7 to 28,143.4)            | 58,410.1<br>(53,550.4 to 63,051.5)             | 27,317.8<br>(24,924.8 to 29,846.4)            | 31,092.4<br>(28,582.3 to 33,541.1)             | 69,328.1<br>(63,888.5 to 74,939.3)             | 32,156.2<br>(29,414.9 to 35,053.4)             | 37,171.9<br>(34,239.9 to 39,962.0)             |
| Ischemic heart disease                        | 190,675.8<br>(175,711.2 to 206,643.2)          | 85,911.1<br>(79,223.1 to 93,209.9)           | 104,764.8<br>(96,067.7 to 114,051.4)          | 225,942.8<br>(208,325.8 to 245,988.7)          | 101,592.4<br>(93,912.5 to 110,636.6)          | 124,350.0<br>(113,801.5 to 136,081.9)          | 262,008.2<br>(242,178.7 to 285,445.7)          | 116,599.9<br>(107,837.7 to 126,833.3)          | 145,408.3<br>(133,789.2 to 159,226.5)          |
| Ischemic stroke                               | 136,597.7<br>(135,219.7 to 140,242.1)          | 78,827.5<br>(76,733.9 to 80,852.8)           | 87,769.9<br>(86,149.4 to 89,426.1)            | 157,928.3<br>(153,913.0 to 162,340.4)          | 90,834.7<br>(88,124.9 to 93,594.7)            | 67,093.6<br>(65,348.9 to 68,903.3)             | 187,634.7<br>(182,345.7 to 192,989.3)          | 107,722.3<br>(104,531.6 to 111,025.3)          | 79,912.4<br>(77,565.8 to 82,173.6)             |
| Other cardiovascular and circulatory diseases | 691,305.4<br>(552,481.6 to 857,552.6)          | 407,834.5<br>(312,674.9 to 526,898.5)        | 283,470.9<br>(233,302.4 to 343,052.4)         | 779,166.9<br>(619,654.5 to 966,777.7)          | 447,528.0<br>(343,682.3 to 578,246.9)         | 331,640.9<br>(271,061.0 to 402,741.2)          | 918,896.7<br>(733,393.8 to 1,129,209.5)        | 529,529.2<br>(405,586.8 to 683,643.9)          | 388,971.6<br>(319,793.5 to 466,475.5)          |
| Peripheral artery disease                     | 709,005.9<br>(615,736.5 to 821,559.3)          | 378,769.9<br>(328,552.2 to 438,274.2)        | 330,236.0<br>(285,775.8 to 383,632.0)         | 828,703.7<br>(721,821.2 to 962,762.5)          | 438,438.7<br>(379,218.1 to 509,156.0)         | 390,264.9<br>(338,930.2 to 453,550.2)          | 975,814.1<br>(851,296.4 to 1,130,037.0)        | 511,584.6<br>(444,969.4 to 588,885.0)          | 464,229.5<br>(403,962.2 to 540,024.4)          |
| <b>Eastern Sub-Saharan Africa</b>             |                                                |                                              |                                               |                                                |                                               |                                                |                                                |                                                |                                                |
| Atrial fibrillation and flutter               | 240,802.3<br>(207,967.7 to 280,518.3)          | 91,997.4<br>(78,574.3 to 108,000.1)          | 148,805.0<br>(128,441.1 to 173,550.1)         | 285,241.1<br>(246,883.5 to 331,480.0)          | 109,998.5<br>(94,023.0 to 128,746.6)          | 175,243.2<br>(151,971.1 to 203,125.5)          | 336,685.2<br>(291,703.7 to 391,099.3)          | 130,899.5<br>(111,828.4 to 152,983.0)          | 205,785.7<br>(178,727.4 to 232,228.0)          |
| Cardiomyopathy and myocarditis                | 72,400.8<br>(64,628.0 to 81,321.5)             | 34,059.4<br>(30,190.7 to 38,493.9)           | 38,341.4<br>(34,149.7 to 42,971.4)            | 86,047.3<br>(76,565.7 to 96,793.3)             | 40,674.9<br>(36,075.1 to 45,722.3)            | 45,372.3<br>(40,349.2 to 51,139.0)             | 101,720.5<br>(90,625.4 to 114,363.4)           | 48,183.8<br>(42,928.6 to 54,261.3)             | 53,536.7<br>(47,335.0 to 60,512.8)             |
| Endocarditis                                  | 1,593.4<br>(1,506.2 to 1,674.5)                | 886.3<br>(838.2 to 933.4)                    | 707.0<br>(667.8 to 744.0)                     | 1,866.5<br>(1,765.1 to 1,961.2)                | 1,028.7<br>(973.0 to 1,081.5)                 | 837.7<br>(788.4 to 881.8)                      | 2,244.8<br>(2,111.4 to 2,376.6)                | 1,231.8<br>(1,157.0 to 1,302.8)                | 1,013.0<br>(947.8 to 1,077.2)                  |
| Hemorrhagic and other stroke                  | 570,891.3<br>(555,321.9 to 587,566.6)          | 313,407.7<br>(304,920.0 to 322,148.2)        | 257,483.6<br>(249,915.8 to 265,664.0)         | 677,133.0<br>(658,529.2 to 696,273.2)          | 370,544.3<br>(360,452.0 to 380,975.4)         | 306,588.8<br>(297,547.6 to 315,636.0)          | 840,949.9<br>(816,965.6 to 866,460.8)          | 461,124.5<br>(448,030.0 to 475,939.2)          | 379,825.4<br>(368,337.1 to 392,136.2)          |
| Hypertensive heart disease                    | 132,238.0<br>(120,368.8 to 144,611.0)          | 58,995.5<br>(52,946.5 to 65,299.8)           | 73,242.5<br>(67,116.6 to 80,004.6)            | 159,911.4<br>(144,778.2 to 175,045.5)          | 71,788.3<br>(63,900.8 to 79,479.0)            | 98,128.3<br>(80,293.0 to 95,851.4)             | 188,661.9<br>(171,507.4 to 206,126.0)          | 85,528.6<br>(76,755.2 to 94,213.2)             | 101,133.3<br>(94,271.3 to 112,339.0)           |
| Ischemic heart disease                        | 2,309,724.6<br>(2,041,180.2 to 2,624,430.6)    | 936,495.9<br>(837,206.3 to 1,050,524.0)      | 1,373,228.5<br>(1,194,363.0 to 1,592,372.8)   | 2,624,592.6<br>(2,310,068.2 to 2,988,940.9)    | 1,070,996.4<br>(956,757.1 to 1,202,042.0)     | 1,554,496.1<br>(1,346,695.0 to 1,801,574.7)    | 3,098,871.9<br>(2,735,641.9 to 3,532,901.4)    | 1,264,988.5<br>(1,131,992.1 to 1,434,791.8)    | 1,333,883.3<br>(1,198,280.2 to 1,526,671.9)    |
| Ischemic stroke                               | 504,659.3<br>(526,220.4 to 554,353.0)          | 291,213.3<br>(283,482.4 to 298,744.8)        | 249,447.9<br>(242,487.0 to 256,518.1)         | 633,435.6<br>(615,471.2 to 648,420.5)          | 309,126.3<br>(330,855.6 to 349,252.3)         | 291,719.3<br>(284,093.2 to 299,668.6)          | 772,966.0<br>(750,966.5 to 795,839.0)          | 418,378.7<br>(406,070.4 to 431,31              |                                                |



Table 4a. All-ages prevalence per 100,000 persons for men and women separately and combined, for all CVD level 3 and 4 subcauses, by country in 1990 and 2015

|                                        | 1990    |         |         | 2015    |         |         | Median percent change between 1990-2015 |        |       |
|----------------------------------------|---------|---------|---------|---------|---------|---------|-----------------------------------------|--------|-------|
|                                        | Both    | Female  | Male    | Both    | Female  | Male    | Both                                    | Female | Male  |
| <b>Atrial fibrillation and flutter</b> |         |         |         |         |         |         |                                         |        |       |
| Afghanistan                            | 76.58   | 60.87   | 91.53   | 87.13   | 69.81   | 103.4   | 0.14                                    | 0.15   | 0.14  |
| Albania                                | 404.16  | 344.46  | 461.01  | 815.85  | 706.67  | 926.78  | 1.00                                    | 1.03   | 1.00  |
| Algeria                                | 110.6   | 91.17   | 129.56  | 202.32  | 157.47  | 246.55  | 0.80                                    | 0.70   | 0.87  |
| American Samoa                         | 178.91  | 139.72  | 216     | 185.03  | 163.16  | 206.79  | 0.03                                    | 0.16   | -0.05 |
| Andorra                                | 1006.21 | 925.25  | 1091.58 | 1356.83 | 1196.42 | 1523.97 | 0.34                                    | 0.29   | 0.38  |
| Angola                                 | 77.25   | 60.9    | 94.01   | 74.54   | 58.38   | 90.92   | -0.03                                   | -0.03  | -0.02 |
| Antigua and Barbuda                    | 228.3   | 192.44  | 266.65  | 240.38  | 193.09  | 291.95  | 0.05                                    | 0.00   | 0.09  |
| Argentina                              | 449.06  | 304.51  | 599.31  | 544.24  | 399.68  | 695.08  | 0.21                                    | 0.31   | 0.16  |
| Armenia                                | 437.15  | 396.86  | 479.85  | 738.39  | 676.01  | 810.25  | 0.66                                    | 0.68   | 0.66  |
| Australia                              | 545.43  | 400.25  | 691.4   | 693.23  | 479.38  | 907.63  | 0.26                                    | 0.19   | 0.30  |
| Austria                                | 986.11  | 979.87  | 992.91  | 1889.25 | 1679.78 | 2109.12 | 0.90                                    | 0.71   | 1.09  |
| Azerbaijan                             | 336.5   | 312.18  | 361.88  | 495.08  | 424.14  | 566.85  | 0.46                                    | 0.35   | 0.55  |
| Bahrain                                | 93.47   | 67.67   | 112.45  | 123.21  | 97.39   | 139.02  | 0.31                                    | 0.43   | 0.23  |
| Bangladesh                             | 135.74  | 94.41   | 175.24  | 210.31  | 149.49  | 269.95  | 0.56                                    | 0.59   | 0.56  |
| Barbados                               | 278.27  | 246.07  | 312.96  | 411.91  | 336.3   | 494.09  | 0.47                                    | 0.36   | 0.56  |
| Belarus                                | 670.1   | 677.81  | 661.36  | 876.06  | 880.6   | 870.8   | 0.30                                    | 0.29   | 0.30  |
| Belgium                                | 692.38  | 650.2   | 736.51  | 914.71  | 828.68  | 1004.14 | 0.31                                    | 0.27   | 0.34  |
| Belize                                 | 128.59  | 96.81   | 159.84  | 135.91  | 96.83   | 175.22  | 0.06                                    | 0.00   | 0.11  |
| Benin                                  | 93.99   | 79.23   | 109.69  | 89.35   | 72.43   | 106.33  | -0.04                                   | -0.08  | -0.02 |
| Bermuda                                | 206.88  | 157.54  | 256.85  | 287.69  | 224.9   | 351.69  | 0.38                                    | 0.42   | 0.36  |
| Bhutan                                 | 138.24  | 95.42   | 178.03  | 220.07  | 144.51  | 285.12  | 0.57                                    | 0.50   | 0.58  |
| Bolivia                                | 133.73  | 103.59  | 163.66  | 200.13  | 153.95  | 246.14  | 0.47                                    | 0.46   | 0.48  |
| Bosnia and Herzegovina                 | 510.88  | 478.38  | 543.42  | 1004.38 | 929.64  | 1079.82 | 0.94                                    | 0.92   | 0.96  |
| Botswana                               | 78.18   | 67.09   | 89.53   | 115     | 93.04   | 136.98  | 0.46                                    | 0.38   | 0.52  |
| Brazil                                 | 134.86  | 111.89  | 158.2   | 257.63  | 212.89  | 303.86  | 0.89                                    | 0.89   | 0.90  |
| Brunei                                 | 107.7   | 35.9    | 171.97  | 187.54  | 67.34   | 300.64  | 0.69                                    | 0.81   | 0.70  |
| Bulgaria                               | 843.54  | 762.35  | 927.01  | 1181.99 | 1153.29 | 1212.11 | 0.39                                    | 0.50   | 0.30  |
| Burkina Faso                           | 90.57   | 74.88   | 106.99  | 74.02   | 64.19   | 83.97   | -0.18                                   | -0.14  | -0.21 |
| Burundi                                | 84.18   | 67.51   | 101.44  | 80.41   | 59.89   | 101.37  | -0.01                                   | -0.09  | 0.04  |
| Cambodia                               | 150.64  | 131.41  | 171.25  | 213.5   | 193.34  | 234.66  | 0.45                                    | 0.49   | 0.41  |
| Cameroon                               | 102.61  | 79.83   | 125.68  | 95.37   | 73.72   | 117.01  | -0.05                                   | -0.07  | -0.05 |
| Canada                                 | 757.15  | 457.86  | 1061.58 | 1046.97 | 592.48  | 1507.84 | 0.37                                    | 0.29   | 0.40  |
| Cape Verde                             | 122.34  | 99.03   | 148.12  | 148.08  | 125.92  | 170.83  | 0.20                                    | 0.26   | 0.15  |
| Central African Republic               | 115.56  | 90.06   | 141.93  | 111.17  | 88.41   | 134.54  | -0.04                                   | -0.02  | -0.05 |
| Chad                                   | 94.41   | 73.95   | 115.16  | 76.89   | 59.57   | 94.17   | -0.18                                   | -0.19  | -0.18 |
| Chile                                  | 344.81  | 227.65  | 465.14  | 578.19  | 402.35  | 758.73  | 0.65                                    | 0.74   | 0.60  |
| China                                  | 246.31  | 219.92  | 271.34  | 455.43  | 399.1   | 508.49  | 0.89                                    | 0.84   | 0.92  |
| Colombia                               | 129.53  | 104.27  | 155.11  | 225.91  | 179.99  | 273.25  | 0.73                                    | 0.71   | 0.74  |
| Comoros                                | 86.89   | 69.2    | 104.46  | 89.85   | 69.61   | 109.73  | 0.04                                    | 0.01   | 0.05  |
| Congo                                  | 107.3   | 82.45   | 132.28  | 108.46  | 83.86   | 133.02  | 0.01                                    | 0.02   | 0.01  |
| Costa Rica                             | 152.22  | 117.35  | 186.53  | 275.46  | 211.37  | 339.47  | 0.79                                    | 0.78   | 0.80  |
| Cote d'Ivoire                          | 92.93   | 62.08   | 121.34  | 96.66   | 62.55   | 129.6   | 0.05                                    | 0.01   | 0.08  |
| Croatia                                | 599.99  | 566.02  | 636.09  | 741.13  | 668.43  | 819.17  | 0.23                                    | 0.17   | 0.28  |
| Cuba                                   | 266.05  | 202.05  | 329.09  | 425.19  | 329.79  | 519.69  | 0.58                                    | 0.62   | 0.56  |
| Cyprus                                 | 548.7   | 464.76  | 634.78  | 700.5   | 616.71  | 790.06  | 0.25                                    | 0.30   | 0.21  |
| Czech Republic                         | 1074.39 | 1053.16 | 1096.9  | 1690.68 | 1527.54 | 1859.06 | 0.56                                    | 0.44   | 0.68  |
| Democratic Republic of the Congo       | 87.97   | 72.3    | 104.04  | 88.51   | 69.41   | 107.71  | 0.01                                    | -0.04  | 0.04  |
| Denmark                                | 717.64  | 632.41  | 805.35  | 1016.29 | 850.15  | 1185.08 | 0.41                                    | 0.34   | 0.46  |
| Djibouti                               | 81.55   | 63.41   | 99.47   | 121.59  | 91.85   | 151.07  | 0.48                                    | 0.44   | 0.51  |
| Dominica                               | 196.46  | 149.41  | 243.86  | 279.93  | 218.56  | 342.28  | 0.43                                    | 0.47   | 0.42  |
| Dominican Republic                     | 129.39  | 90.68   | 167.59  | 215.82  | 161.75  | 270.25  | 0.66                                    | 0.77   | 0.61  |
| Ecuador                                | 135.76  | 104.03  | 167.13  | 214.06  | 165.56  | 262.58  | 0.58                                    | 0.59   | 0.58  |
| Egypt                                  | 147.12  | 128.1   | 166.01  | 168.43  | 142.44  | 193.89  | 0.14                                    | 0.11   | 0.17  |
| El Salvador                            | 135.18  | 105.37  | 166.4   | 242.79  | 192.11  | 300.08  | 0.80                                    | 0.82   | 0.82  |
| Equatorial Guinea                      | 122.37  | 96.08   | 147.53  | 111.74  | 76.75   | 145.02  | -0.09                                   | -0.20  | -0.02 |
| Eritrea                                | 57.43   | 48.62   | 66.35   | 76.2    | 64.33   | 88.02   | 0.33                                    | 0.33   | 0.34  |
| Estonia                                | 703.63  | 719.39  | 685.7   | 982.29  | 1004.1  | 956.68  | 0.38                                    | 0.38   | 0.38  |

|                                |         |         |         |         |         |         |       |       |       |
|--------------------------------|---------|---------|---------|---------|---------|---------|-------|-------|-------|
| Ethiopia                       | 93.32   | 66.66   | 120.14  | 98.52   | 74.85   | 122.28  | 0.06  | 0.13  | 0.03  |
| Federated States of Micronesia | 168.63  | 137.71  | 198.23  | 220.82  | 187.9   | 252.17  | 0.30  | 0.36  | 0.26  |
| Fiji                           | 164.62  | 129.7   | 198.46  | 293.56  | 245.91  | 339.62  | 0.77  | 0.88  | 0.70  |
| Finland                        | 1227.86 | 1187.79 | 1270.38 | 1873.95 | 1732.58 | 2019.66 | 0.51  | 0.45  | 0.56  |
| France                         | 971.4   | 893.79  | 1053.23 | 1275.44 | 1140.66 | 1418.93 | 0.31  | 0.27  | 0.34  |
| Gabon                          | 160.93  | 129.42  | 193.76  | 145.59  | 115.09  | 175.4   | -0.10 | -0.11 | -0.10 |
| Georgia                        | 624.23  | 606.34  | 643.96  | 852.02  | 820.34  | 886.67  | 0.36  | 0.35  | 0.37  |
| Germany                        | 1042.33 | 1010.63 | 1076.39 | 1481.67 | 1297.52 | 1672.06 | 0.41  | 0.28  | 0.53  |
| Ghana                          | 86.64   | 65.76   | 106.85  | 104.58  | 83.02   | 126.35  | 0.22  | 0.27  | 0.20  |
| Greece                         | 863.52  | 714.55  | 1016.3  | 1295.17 | 1144.78 | 1453    | 0.49  | 0.59  | 0.41  |
| Greenland                      | 297.86  | 173.24  | 405.71  | 569.18  | 279.4   | 820.42  | 0.88  | 0.60  | 0.97  |
| Grenada                        | 208.96  | 182.02  | 236.61  | 223.59  | 191.63  | 255.34  | 0.09  | 0.06  | 0.10  |
| Guam                           | 212.77  | 175.47  | 245.34  | 408.11  | 343.98  | 470.45  | 0.94  | 0.97  | 0.95  |
| Guatemala                      | 109.16  | 80.74   | 137.99  | 149.99  | 117.91  | 183.47  | 0.40  | 0.48  | 0.36  |
| Guinea                         | 101.77  | 78.73   | 125.32  | 96.62   | 73.51   | 119.62  | -0.05 | -0.07 | -0.04 |
| Guinea-Bissau                  | 107.01  | 84      | 130.57  | 98.39   | 75.3    | 121.77  | -0.07 | -0.10 | -0.05 |
| Guyana                         | 125     | 93.91   | 157.09  | 175.03  | 134.63  | 215.04  | 0.41  | 0.43  | 0.38  |
| Haiti                          | 125.85  | 96.4    | 156.18  | 148.44  | 116.97  | 180.59  | 0.21  | 0.23  | 0.20  |
| Honduras                       | 107.97  | 82.45   | 133.3   | 159.91  | 121.38  | 198.44  | 0.49  | 0.47  | 0.50  |
| Hungary                        | 833.14  | 816.34  | 851.31  | 1055.94 | 1062.3  | 1048.93 | 0.26  | 0.29  | 0.23  |
| Iceland                        | 1198.23 | 894.12  | 1499.67 | 1476.96 | 1082.11 | 1880.26 | 0.22  | 0.20  | 0.23  |
| India                          | 168.38  | 125.58  | 208.24  | 239.84  | 185.5   | 290.34  | 0.43  | 0.48  | 0.40  |
| Indonesia                      | 196.44  | 163.62  | 228.97  | 276.66  | 229.49  | 323.15  | 0.43  | 0.42  | 0.44  |
| Iran                           | 111.32  | 81.75   | 139.81  | 187.92  | 135.92  | 239.15  | 0.66  | 0.63  | 0.69  |
| Iraq                           | 119.74  | 96.55   | 142.51  | 108.75  | 91.48   | 125.6   | -0.09 | -0.05 | -0.12 |
| Ireland                        | 729.83  | 576.66  | 884.35  | 836.4   | 622.66  | 1056.48 | 0.13  | 0.07  | 0.18  |
| Israel                         | 633.97  | 521.61  | 746.75  | 808.13  | 688.34  | 929.95  | 0.27  | 0.31  | 0.24  |
| Italy                          | 933.16  | 826.52  | 1046.31 | 1293.18 | 1126.49 | 1470.41 | 0.37  | 0.36  | 0.39  |
| Jamaica                        | 213.8   | 168.87  | 259.9   | 280.78  | 213.98  | 348.11  | 0.30  | 0.25  | 0.32  |
| Japan                          | 356.24  | 195.25  | 523.02  | 703.03  | 423.53  | 997.38  | 0.93  | 1.14  | 0.85  |
| Jordan                         | 111.37  | 85.76   | 134.54  | 131.37  | 102.83  | 158.53  | 0.16  | 0.19  | 0.16  |
| Kazakhstan                     | 414.3   | 419.53  | 408.74  | 499.34  | 473.32  | 527.22  | 0.21  | 0.13  | 0.29  |
| Kenya                          | 80.97   | 59.15   | 102.94  | 88.5    | 68.38   | 108.62  | 0.10  | 0.16  | 0.06  |
| Kiribati                       | 174.84  | 153.36  | 196.77  | 200     | 180.35  | 220.16  | 0.15  | 0.18  | 0.12  |
| Kuwait                         | 82.09   | 48.72   | 111.27  | 108.11  | 73.43   | 135.18  | 0.30  | 0.49  | 0.20  |
| Kyrgyzstan                     | 354.46  | 347.84  | 361.36  | 357.21  | 314.43  | 400.91  | 0.01  | -0.10 | 0.11  |
| Laos                           | 172.02  | 148.64  | 195.43  | 194.68  | 165.87  | 223.77  | 0.15  | 0.13  | 0.17  |
| Latvia                         | 721.96  | 736.73  | 704.94  | 964.66  | 989.98  | 935.17  | 0.32  | 0.33  | 0.31  |
| Lebanon                        | 186.28  | 143.28  | 230.47  | 261.16  | 197.25  | 324.41  | 0.39  | 0.36  | 0.39  |
| Lesotho                        | 114.35  | 95.15   | 134.7   | 112.91  | 102.35  | 123.68  | -0.02 | 0.07  | -0.09 |
| Liberia                        | 89.18   | 66.31   | 112.18  | 94.26   | 72.97   | 115.2   | 0.06  | 0.10  | 0.03  |
| Libya                          | 107.31  | 82.6    | 129.44  | 162.23  | 130.15  | 193.92  | 0.50  | 0.56  | 0.49  |
| Lithuania                      | 664.49  | 652.24  | 678.13  | 959.31  | 969.13  | 947.89  | 0.43  | 0.47  | 0.38  |
| Luxembourg                     | 982.59  | 953.46  | 1012.91 | 1089.81 | 1021.11 | 1158.79 | 0.11  | 0.07  | 0.14  |
| Macedonia                      | 530.43  | 451.14  | 608.79  | 833.74  | 756.19  | 911.98  | 0.55  | 0.66  | 0.48  |
| Madagascar                     | 91.78   | 62.42   | 121.22  | 90.77   | 68.91   | 112.76  | 0.00  | 0.12  | -0.06 |
| Malawi                         | 78.13   | 61.52   | 95.32   | 88.55   | 71.46   | 105.71  | 0.15  | 0.18  | 0.13  |
| Malaysia                       | 189.98  | 151.03  | 227.78  | 299.27  | 230.11  | 369.71  | 0.57  | 0.52  | 0.62  |
| Maldives                       | 158.77  | 98.52   | 216     | 251.94  | 188.1   | 315.42  | 0.58  | 0.90  | 0.46  |
| Mali                           | 103.78  | 79.66   | 128.43  | 77.85   | 62.13   | 93.25   | -0.24 | -0.21 | -0.26 |
| Malta                          | 614.27  | 551.39  | 679.39  | 990.94  | 944     | 1038.26 | 0.58  | 0.69  | 0.49  |
| Marshall Islands               | 144.49  | 119.72  | 168.18  | 201.72  | 171.89  | 230.53  | 0.39  | 0.43  | 0.37  |
| Mauritania                     | 91.34   | 72.87   | 109.93  | 100.31  | 80.64   | 119.71  | 0.11  | 0.11  | 0.10  |
| Mauritius                      | 226.8   | 206.98  | 246.71  | 447.49  | 389.52  | 506.9   | 0.95  | 0.87  | 1.02  |
| Mexico                         | 136.2   | 109.21  | 163.48  | 214.8   | 167.42  | 262.66  | 0.57  | 0.52  | 0.59  |
| Moldova                        | 531.53  | 497.83  | 568.5   | 697.73  | 647.71  | 751.81  | 0.29  | 0.28  | 0.30  |
| Mongolia                       | 285.61  | 238.42  | 333.92  | 340.9   | 284.35  | 398.6   | 0.18  | 0.18  | 0.18  |
| Montenegro                     | 588.7   | 559.4   | 618.27  | 896.85  | 829.71  | 965.6   | 0.51  | 0.47  | 0.54  |
| Morocco                        | 125.59  | 104.18  | 147.09  | 212.15  | 169.39  | 255.9   | 0.67  | 0.61  | 0.72  |
| Mozambique                     | 88.54   | 71.8    | 106.8   | 91.96   | 75.73   | 108.95  | 0.05  | 0.06  | 0.03  |
| Myanmar                        | 202.62  | 172.67  | 233.79  | 281.84  | 240.44  | 325.14  | 0.42  | 0.42  | 0.43  |

|                                  |         |         |         |         |         |         |       |       |       |
|----------------------------------|---------|---------|---------|---------|---------|---------|-------|-------|-------|
| Namibia                          | 96.28   | 78.41   | 114.93  | 106.53  | 89.94   | 124     | 0.11  | 0.15  | 0.08  |
| Nepal                            | 143.42  | 119.79  | 167.4   | 214.67  | 159.96  | 272.85  | 0.51  | 0.34  | 0.65  |
| Netherlands                      | 1282.12 | 1167.06 | 1399.8  | 1730.14 | 1435.51 | 2029.69 | 0.34  | 0.23  | 0.43  |
| New Zealand                      | 1186.76 | 1104.46 | 1271.58 | 1548.99 | 1353.73 | 1751.72 | 0.29  | 0.21  | 0.35  |
| Nicaragua                        | 100.09  | 81.49   | 118.98  | 171.33  | 137.84  | 205.78  | 0.73  | 0.70  | 0.75  |
| Niger                            | 75.33   | 57.92   | 93.32   | 82.13   | 59.49   | 104.4   | 0.10  | 0.04  | 0.14  |
| Nigeria                          | 89.24   | 68.87   | 109.21  | 86.34   | 65.11   | 106.77  | -0.03 | -0.05 | -0.02 |
| North Korea                      | 235.21  | 248.05  | 221.61  | 420.28  | 424.52  | 415.85  | 0.79  | 0.72  | 0.89  |
| Northern Mariana Islands         | 135.26  | 94.6    | 171.81  | 135.05  | 88.53   | 181.9   | 0.01  | -0.06 | 0.08  |
| Norway                           | 1533.67 | 1297.47 | 1775.21 | 2011.62 | 1521.28 | 2496.27 | 0.30  | 0.17  | 0.39  |
| Oman                             | 86.34   | 75.28   | 95.16   | 117.38  | 92.36   | 130.07  | 0.35  | 0.22  | 0.36  |
| Pakistan                         | 164.06  | 108.83  | 215.32  | 186.17  | 132.82  | 236.67  | 0.14  | 0.22  | 0.10  |
| Palestine                        | 76.42   | 62.69   | 89.81   | 101.66  | 81.61   | 121.15  | 0.32  | 0.29  | 0.33  |
| Panama                           | 151.32  | 113.08  | 188.72  | 242.93  | 184.93  | 300.6   | 0.63  | 0.66  | 0.63  |
| Papua New Guinea                 | 134.55  | 115.38  | 152.85  | 170.46  | 148.48  | 191.58  | 0.27  | 0.29  | 0.26  |
| Paraguay                         | 129.5   | 101.49  | 156.88  | 193.82  | 146.07  | 240.14  | 0.48  | 0.43  | 0.51  |
| Peru                             | 128.62  | 99.91   | 157.34  | 215.73  | 170.77  | 260.75  | 0.68  | 0.71  | 0.66  |
| Philippines                      | 160.14  | 139.08  | 180.75  | 236.83  | 206.1   | 267     | 0.49  | 0.49  | 0.49  |
| Poland                           | 862.11  | 851.62  | 873.14  | 1471.87 | 1450.92 | 1494.42 | 0.69  | 0.69  | 0.70  |
| Portugal                         | 937.33  | 820.05  | 1063.46 | 1304.09 | 1163.9  | 1453.58 | 0.37  | 0.40  | 0.34  |
| Puerto Rico                      | 283.19  | 216.37  | 354.23  | 409.93  | 339.87  | 485.62  | 0.44  | 0.56  | 0.36  |
| Qatar                            | 85.98   | 51.92   | 102.79  | 92.87   | 61.62   | 104.56  | 0.07  | 0.17  | 0.01  |
| Romania                          | 520.83  | 504.38  | 537.75  | 688.73  | 703.38  | 673.13  | 0.31  | 0.38  | 0.24  |
| Russia                           | 642.25  | 671.88  | 608.61  | 860.25  | 860.57  | 859.87  | 0.33  | 0.27  | 0.40  |
| Rwanda                           | 69.05   | 54.45   | 84.15   | 84.65   | 71.75   | 98.68   | 0.23  | 0.32  | 0.18  |
| Saint Lucia                      | 203.62  | 159.14  | 249.43  | 281.27  | 220.65  | 344.21  | 0.40  | 0.40  | 0.41  |
| Saint Vincent and the Grenadines | 175.32  | 145.6   | 205.34  | 242.33  | 187.95  | 295.71  | 0.39  | 0.29  | 0.45  |
| Samoa                            | 178.94  | 153.06  | 202.78  | 259.15  | 229.34  | 287.14  | 0.44  | 0.49  | 0.41  |
| Sao Tome and Principe            | 126.61  | 97.86   | 155.9   | 99.68   | 80.27   | 119.24  | -0.21 | -0.18 | -0.23 |
| Saudi Arabia                     | 97.2    | 78.9    | 111.6   | 136.37  | 100.6   | 163.85  | 0.38  | 0.25  | 0.44  |
| Senegal                          | 89.32   | 68.92   | 109.92  | 88.24   | 72.36   | 104.7   | -0.01 | 0.05  | -0.04 |
| Serbia                           | 450.82  | 412.92  | 489.74  | 598.01  | 576.84  | 620.21  | 0.31  | 0.38  | 0.25  |
| Seychelles                       | 287.42  | 265.74  | 309.19  | 374.25  | 334.48  | 412.97  | 0.30  | 0.25  | 0.33  |
| Sierra Leone                     | 96.61   | 67.94   | 125.87  | 84.24   | 61.59   | 107.35  | -0.11 | -0.08 | -0.12 |
| Singapore                        | 200.38  | 64.39   | 332.82  | 383.62  | 137.97  | 638.03  | 0.87  | 1.11  | 0.87  |
| Slovakia                         | 896.77  | 878.27  | 916.13  | 1542.77 | 1533.52 | 1552.53 | 0.70  | 0.73  | 0.67  |
| Slovenia                         | 759.7   | 750.85  | 769.09  | 1250.58 | 1162.73 | 1340.01 | 0.62  | 0.53  | 0.71  |
| Solomon Islands                  | 148.18  | 106.9   | 187.26  | 178.69  | 138.76  | 217.39  | 0.21  | 0.30  | 0.16  |
| Somalia                          | 91.88   | 70.31   | 113.83  | 82.84   | 63.84   | 102.02  | -0.10 | -0.09 | -0.10 |
| South Africa                     | 130.6   | 111.74  | 149.91  | 166.51  | 149.09  | 184.54  | 0.27  | 0.33  | 0.23  |
| South Korea                      | 167.99  | 89.84   | 245.79  | 416.03  | 218.83  | 615.63  | 1.40  | 1.37  | 1.42  |
| South Sudan                      | 84.63   | 63.81   | 105.64  | 98.16   | 75.02   | 121.22  | 0.16  | 0.18  | 0.15  |
| Spain                            | 1096.67 | 1020.51 | 1176    | 1474.24 | 1342.46 | 1609.43 | 0.33  | 0.31  | 0.35  |
| Sri Lanka                        | 263.88  | 202.9   | 323.68  | 416.07  | 350.2   | 486.88  | 0.60  | 0.74  | 0.53  |
| Sudan                            | 99.37   | 79.45   | 119.13  | 113.78  | 90.82   | 136.56  | 0.15  | 0.15  | 0.15  |
| Suriname                         | 152.49  | 120.49  | 183.47  | 221.16  | 182.43  | 259.74  | 0.45  | 0.51  | 0.41  |
| Swaziland                        | 80.6    | 64.51   | 98.59   | 101.01  | 84.75   | 117.62  | 0.25  | 0.31  | 0.19  |
| Sweden                           | 1370.22 | 1073.75 | 1673.89 | 1941.62 | 1564.05 | 2319.94 | 0.40  | 0.45  | 0.36  |
| Switzerland                      | 645.03  | 588.18  | 704.57  | 686.33  | 598.71  | 775.93  | 0.06  | 0.01  | 0.09  |
| Syria                            | 98.94   | 76.42   | 120.75  | 140.75  | 115.4   | 165.48  | 0.41  | 0.50  | 0.36  |
| Taiwan                           | 332.96  | 268.11  | 393.16  | 627.9   | 530.1   | 726.03  | 0.93  | 1.00  | 0.91  |
| Tajikistan                       | 280.88  | 252.08  | 310.02  | 274.08  | 208.67  | 337.97  | -0.03 | -0.17 | 0.09  |
| Tanzania                         | 81.13   | 63.36   | 99.22   | 89.51   | 66.44   | 112.87  | 0.12  | 0.06  | 0.16  |
| Thailand                         | 233.13  | 195.84  | 271.1   | 503.27  | 419.88  | 589.06  | 1.16  | 1.14  | 1.17  |
| The Bahamas                      | 138.71  | 116.7   | 161.03  | 259.72  | 215.39  | 305.96  | 0.85  | 0.82  | 0.88  |
| The Gambia                       | 81.37   | 53.85   | 108.51  | 76.87   | 53.99   | 100.2   | -0.05 | 0.00  | -0.07 |
| Timor-Leste                      | 115.73  | 94.86   | 136.08  | 216.95  | 177.2   | 255.48  | 0.89  | 0.89  | 0.89  |
| Togo                             | 88.48   | 69.72   | 107.72  | 86.27   | 67.61   | 105.38  | -0.02 | -0.02 | -0.01 |
| Tonga                            | 208.12  | 176.55  | 238.91  | 272.91  | 248.4   | 297.29  | 0.31  | 0.40  | 0.24  |
| Trinidad and Tobago              | 173.74  | 140.84  | 206.88  | 287.35  | 233.31  | 342.83  | 0.64  | 0.64  | 0.64  |
| Tunisia                          | 155.21  | 120.04  | 189.95  | 255.66  | 208.04  | 304.39  | 0.62  | 0.71  | 0.58  |

|                                       |         |         |         |         |         |         |       |       |       |
|---------------------------------------|---------|---------|---------|---------|---------|---------|-------|-------|-------|
| Turkey                                | 179.81  | 149.12  | 211.26  | 248.36  | 214.53  | 283.39  | 0.37  | 0.43  | 0.33  |
| Turkmenistan                          | 278.83  | 261.72  | 296.41  | 350.19  | 300.98  | 401.08  | 0.25  | 0.14  | 0.34  |
| Uganda                                | 78.85   | 60.19   | 97.75   | 71.56   | 56.64   | 86.5    | -0.08 | -0.05 | -0.10 |
| Ukraine                               | 737.47  | 753.23  | 719.13  | 948.01  | 944.29  | 952.41  | 0.28  | 0.25  | 0.32  |
| United Arab Emirates                  | 74.04   | 48.3    | 87.41   | 105.6   | 53.36   | 124.64  | 0.41  | 0.09  | 0.41  |
| United Kingdom                        | 1105.86 | 983.88  | 1234.88 | 1344.46 | 1138.67 | 1555.39 | 0.21  | 0.15  | 0.25  |
| United States                         | 1430.44 | 1338.87 | 1526.75 | 1832.69 | 1624.88 | 2047.53 | 0.27  | 0.21  | 0.32  |
| Uruguay                               | 565.6   | 391.37  | 750.57  | 699.85  | 539.07  | 872.08  | 0.23  | 0.37  | 0.15  |
| Uzbekistan                            | 289.59  | 271.08  | 308.5   | 371.71  | 320.76  | 424.34  | 0.27  | 0.17  | 0.37  |
| Vanuatu                               | 181.98  | 125.29  | 235.58  | 216.63  | 171.81  | 260.34  | 0.15  | 0.34  | 0.06  |
| Venezuela                             | 121.53  | 94.5    | 148.14  | 201.49  | 160.8   | 242.52  | 0.64  | 0.69  | 0.61  |
| Vietnam                               | 246.8   | 230.81  | 263.28  | 346.83  | 326.44  | 367.66  | 0.44  | 0.44  | 0.44  |
| Virgin Islands, U.S.                  | 187.35  | 146.45  | 230.67  | 469.8   | 365.39  | 584.56  | 1.48  | 1.47  | 1.50  |
| Yemen                                 | 81.93   | 72.46   | 91.57   | 96.68   | 77.22   | 115.75  | 0.18  | 0.06  | 0.26  |
| Zambia                                | 79.15   | 61.25   | 97.36   | 80.66   | 64.5    | 96.88   | 0.03  | 0.06  | 0.01  |
| Zimbabwe                              | 87.97   | 67.24   | 108.88  | 89.29   | 69.73   | 109.43  | 0.02  | 0.04  | 0.01  |
| <b>Cardiomyopathy and myocarditis</b> |         |         |         |         |         |         |       |       |       |
| Afghanistan                           | 11.57   | 10.88   | 12.23   | 11.85   | 11.06   | 12.59   | 0.03  | 0.02  | 0.04  |
| Albania                               | 30.09   | 29.98   | 30.19   | 56.77   | 60.43   | 53.05   | 0.87  | 1.00  | 0.75  |
| Algeria                               | 32.5    | 31.33   | 33.64   | 50.95   | 50.23   | 51.67   | 0.54  | 0.58  | 0.51  |
| American Samoa                        | 32.55   | 37.83   | 27.54   | 33.51   | 39.28   | 27.76   | 0.03  | 0.04  | 0.00  |
| Andorra                               | 48.28   | 55.2    | 40.98   | 56.14   | 67.14   | 44.68   | 0.15  | 0.21  | 0.08  |
| Angola                                | 31.49   | 30.27   | 32.73   | 32.42   | 30.92   | 33.94   | 0.04  | 0.03  | 0.05  |
| Antigua and Barbuda                   | 51.69   | 53.68   | 49.57   | 58.96   | 59.02   | 58.89   | 0.14  | 0.09  | 0.18  |
| Argentina                             | 36.7    | 47.8    | 25.16   | 47.51   | 64.66   | 29.62   | 0.29  | 0.35  | 0.18  |
| Armenia                               | 9.12    | 7.76    | 10.55   | 12.15   | 10.86   | 13.65   | 0.31  | 0.38  | 0.27  |
| Australia                             | 68.01   | 71.74   | 64.26   | 86.51   | 95.05   | 77.95   | 0.26  | 0.32  | 0.20  |
| Austria                               | 62.67   | 74.53   | 49.74   | 71.53   | 83.38   | 59.09   | 0.13  | 0.11  | 0.17  |
| Azerbaijan                            | 10.52   | 9.12    | 11.99   | 14.1    | 12.13   | 16.11   | 0.33  | 0.32  | 0.33  |
| Bahrain                               | 27.74   | 27.38   | 28      | 29.94   | 29.48   | 30.21   | 0.07  | 0.07  | 0.07  |
| Bangladesh                            | 10.67   | 10.43   | 10.91   | 14.01   | 14.64   | 13.39   | 0.32  | 0.41  | 0.24  |
| Barbados                              | 62.2    | 62.73   | 61.63   | 89.05   | 87.8    | 90.4    | 0.42  | 0.39  | 0.45  |
| Belarus                               | 28.1    | 24.68   | 31.97   | 36.39   | 33.38   | 39.88   | 0.28  | 0.34  | 0.23  |
| Belgium                               | 33.6    | 39.5    | 27.44   | 37.78   | 46.02   | 29.21   | 0.11  | 0.16  | 0.05  |
| Belize                                | 34.35   | 35.26   | 33.44   | 39.83   | 38.88   | 40.78   | 0.16  | 0.10  | 0.23  |
| Benin                                 | 31.76   | 30.08   | 33.55   | 38.47   | 34.93   | 42.02   | 0.22  | 0.17  | 0.27  |
| Bermuda                               | 51.54   | 54.22   | 48.84   | 67.03   | 73.26   | 60.68   | 0.29  | 0.34  | 0.24  |
| Bhutan                                | 12.4    | 12.28   | 12.52   | 16.73   | 17.63   | 15.96   | 0.33  | 0.42  | 0.26  |
| Bolivia                               | 7.69    | 8.82    | 6.57    | 12.8    | 15.07   | 10.54   | 0.64  | 0.68  | 0.58  |
| Bosnia and Herzegovina                | 57.15   | 55.02   | 59.28   | 107.86  | 110.63  | 105.06  | 0.86  | 0.99  | 0.75  |
| Botswana                              | 48.61   | 46.26   | 51.02   | 63.1    | 57.94   | 68.27   | 0.29  | 0.25  | 0.33  |
| Brazil                                | 62.22   | 61.14   | 63.32   | 86.97   | 85.49   | 88.49   | 0.39  | 0.39  | 0.39  |
| Brunei                                | 20.14   | 16.58   | 23.33   | 21.79   | 18.67   | 24.72   | 0.05  | 0.09  | 0.03  |
| Bulgaria                              | 34.77   | 36.22   | 33.29   | 51.44   | 60.77   | 41.64   | 0.47  | 0.67  | 0.24  |
| Burkina Faso                          | 29.54   | 27.41   | 31.78   | 32.53   | 30.17   | 34.91   | 0.11  | 0.10  | 0.11  |
| Burundi                               | 20.78   | 19.95   | 21.63   | 21.18   | 19.44   | 22.96   | 0.05  | 0.00  | 0.11  |
| Cambodia                              | 11.99   | 12.04   | 11.94   | 13.72   | 14.16   | 13.25   | 0.17  | 0.19  | 0.14  |
| Cameroon                              | 37.26   | 32.91   | 41.67   | 39.03   | 34.42   | 43.65   | 0.07  | 0.06  | 0.07  |
| Canada                                | 73.55   | 86.62   | 60.26   | 95.65   | 114.75  | 76.28   | 0.29  | 0.32  | 0.24  |
| Cape Verde                            | 49.87   | 49.75   | 50      | 67.91   | 71.39   | 64.34   | 0.35  | 0.42  | 0.28  |
| Central African Republic              | 36.77   | 35.95   | 37.63   | 35.54   | 34.96   | 36.13   | -0.03 | -0.03 | -0.04 |
| Chad                                  | 30.57   | 27.38   | 33.81   | 31.74   | 28.17   | 35.31   | 0.04  | 0.03  | 0.05  |
| Chile                                 | 23.59   | 29.27   | 17.76   | 41.77   | 50.93   | 32.37   | 0.74  | 0.71  | 0.79  |
| China                                 | 11.06   | 11.47   | 10.68   | 17.55   | 19.84   | 15.38   | 0.62  | 0.75  | 0.48  |
| Colombia                              | 27.44   | 29.55   | 25.32   | 41.29   | 44.81   | 37.67   | 0.49  | 0.51  | 0.47  |
| Comoros                               | 26.14   | 25.28   | 27      | 29.48   | 27.8    | 31.13   | 0.13  | 0.10  | 0.16  |
| Congo                                 | 40.87   | 38.34   | 43.41   | 41.36   | 38.79   | 43.92   | 0.02  | 0.02  | 0.02  |
| Costa Rica                            | 50.38   | 47.17   | 53.53   | 73.82   | 71      | 76.65   | 0.45  | 0.49  | 0.41  |
| Cote d'Ivoire                         | 31.87   | 26.2    | 37.1    | 36.98   | 29.75   | 43.97   | 0.17  | 0.14  | 0.20  |
| Croatia                               | 40.17   | 42.71   | 37.47   | 62.61   | 71.84   | 52.71   | 0.55  | 0.67  | 0.39  |
| Cuba                                  | 46.25   | 42.88   | 49.56   | 72.88   | 70.51   | 75.22   | 0.56  | 0.63  | 0.50  |

|                                  |       |        |       |        |        |       |       |       |       |
|----------------------------------|-------|--------|-------|--------|--------|-------|-------|-------|-------|
| Cyprus                           | 25.09 | 26.94  | 23.19 | 26.23  | 29.6   | 22.64 | 0.02  | 0.08  | -0.05 |
| Czech Republic                   | 35.48 | 39.83  | 30.87 | 59.64  | 70.39  | 48.54 | 0.67  | 0.75  | 0.56  |
| Democratic Republic of the Congo | 35.07 | 34.42  | 35.74 | 34.16  | 32.7   | 35.62 | -0.02 | -0.05 | 0.00  |
| Denmark                          | 31.15 | 35.66  | 26.5  | 32.94  | 37.28  | 28.54 | 0.05  | 0.04  | 0.07  |
| Djibouti                         | 24.43 | 24.54  | 24.31 | 32.61  | 31.86  | 33.35 | 0.33  | 0.29  | 0.36  |
| Dominica                         | 60.48 | 53.58  | 67.42 | 79.97  | 73.07  | 86.98 | 0.33  | 0.37  | 0.30  |
| Dominican Republic               | 23.01 | 23.54  | 22.48 | 29.68  | 32.2   | 27.15 | 0.28  | 0.36  | 0.21  |
| Ecuador                          | 15.15 | 16.63  | 13.69 | 20.04  | 22.08  | 18    | 0.33  | 0.33  | 0.32  |
| Egypt                            | 35.28 | 35.96  | 34.6  | 44.81  | 45.61  | 44.02 | 0.27  | 0.27  | 0.27  |
| El Salvador                      | 19.99 | 19.47  | 20.52 | 28.67  | 29.01  | 28.29 | 0.44  | 0.49  | 0.39  |
| Equatorial Guinea                | 40.11 | 38.75  | 41.41 | 45     | 40.39  | 49.39 | 0.12  | 0.04  | 0.19  |
| Eritrea                          | 20.21 | 19.51  | 20.92 | 22.08  | 21.14  | 23.02 | 0.10  | 0.09  | 0.11  |
| Estonia                          | 43.02 | 45.33  | 40.38 | 58.47  | 65.67  | 50.01 | 0.35  | 0.44  | 0.23  |
| Ethiopia                         | 39.42 | 36.9   | 41.95 | 43.69  | 41.65  | 45.74 | 0.12  | 0.14  | 0.10  |
| Federated States of Micronesia   | 18.65 | 20.87  | 16.52 | 23.23  | 27.9   | 18.77 | 0.24  | 0.33  | 0.13  |
| Fiji                             | 14.35 | 15.96  | 12.8  | 18.6   | 21.94  | 15.37 | 0.29  | 0.37  | 0.19  |
| Finland                          | 45.8  | 55.85  | 35.15 | 64.37  | 82.6   | 45.57 | 0.39  | 0.47  | 0.27  |
| France                           | 65.4  | 79.18  | 50.87 | 75.93  | 93.26  | 57.47 | 0.15  | 0.17  | 0.12  |
| Gabon                            | 59.06 | 59.69  | 58.41 | 57.6   | 57.54  | 57.65 | -0.03 | -0.04 | -0.01 |
| Georgia                          | 14.08 | 14.74  | 13.35 | 19.58  | 21.87  | 17.07 | 0.38  | 0.48  | 0.27  |
| Germany                          | 49.34 | 60.03  | 37.85 | 57.29  | 69.32  | 44.86 | 0.15  | 0.15  | 0.17  |
| Ghana                            | 29.63 | 25.45  | 33.68 | 39.23  | 34.8   | 43.69 | 0.34  | 0.38  | 0.32  |
| Greece                           | 36.11 | 41.23  | 30.86 | 43.89  | 54.52  | 32.73 | 0.21  | 0.32  | 0.05  |
| Greenland                        | 45.99 | 32.71  | 57.47 | 62.39  | 41.73  | 80.3  | 0.33  | 0.26  | 0.36  |
| Grenada                          | 50.13 | 52.61  | 47.6  | 58.98  | 63.52  | 54.47 | 0.19  | 0.22  | 0.17  |
| Guam                             | 25.11 | 30.04  | 20.81 | 38.66  | 49.45  | 28.16 | 0.55  | 0.65  | 0.37  |
| Guatemala                        | 23.28 | 22.88  | 23.68 | 28.93  | 30.05  | 27.77 | 0.27  | 0.34  | 0.20  |
| Guinea                           | 21.17 | 18.34  | 24.06 | 24.79  | 21.09  | 28.47 | 0.17  | 0.15  | 0.19  |
| Guinea-Bissau                    | 31.96 | 27.92  | 36.1  | 36.83  | 31.33  | 42.4  | 0.16  | 0.13  | 0.19  |
| Guyana                           | 31.09 | 30.56  | 31.63 | 34.46  | 33     | 35.91 | 0.11  | 0.08  | 0.14  |
| Haiti                            | 22.83 | 22.08  | 23.6  | 23.77  | 23.73  | 23.82 | 0.07  | 0.09  | 0.05  |
| Honduras                         | 21.26 | 19.92  | 22.59 | 24.36  | 23.29  | 25.42 | 0.15  | 0.17  | 0.13  |
| Hungary                          | 55.25 | 58.74  | 51.48 | 90.92  | 105.35 | 75.02 | 0.64  | 0.78  | 0.45  |
| Iceland                          | 22.5  | 19.74  | 25.24 | 24.97  | 22.78  | 27.21 | 0.10  | 0.14  | 0.06  |
| India                            | 6.44  | 7.51   | 5.45  | 7.65   | 8.89   | 6.49  | 0.19  | 0.18  | 0.19  |
| Indonesia                        | 14.84 | 13.49  | 16.19 | 19.91  | 18.67  | 21.13 | 0.36  | 0.40  | 0.33  |
| Iran                             | 15.73 | 15.76  | 15.69 | 18.04  | 18.21  | 17.87 | 0.13  | 0.13  | 0.12  |
| Iraq                             | 20.65 | 18.67  | 22.61 | 22.76  | 20.68  | 24.78 | 0.10  | 0.11  | 0.09  |
| Ireland                          | 34.04 | 35.93  | 32.13 | 37.19  | 39.72  | 34.59 | 0.08  | 0.10  | 0.06  |
| Israel                           | 24.19 | 24.98  | 23.4  | 30.33  | 35.43  | 25.14 | 0.25  | 0.41  | 0.07  |
| Italy                            | 81.11 | 100.61 | 60.43 | 106.52 | 137.62 | 73.44 | 0.30  | 0.36  | 0.20  |
| Jamaica                          | 54.26 | 52.9   | 55.67 | 70.42  | 67.65  | 73.2  | 0.28  | 0.27  | 0.30  |
| Japan                            | 67.93 | 75.5   | 60.09 | 101.18 | 127.72 | 73.23 | 0.46  | 0.67  | 0.19  |
| Jordan                           | 13.55 | 13.06  | 14    | 15.4   | 15.04  | 15.74 | 0.12  | 0.14  | 0.11  |
| Kazakhstan                       | 15.97 | 15.98  | 15.96 | 19.33  | 18.8   | 19.89 | 0.21  | 0.18  | 0.25  |
| Kenya                            | 17.34 | 16.57  | 18.11 | 17.59  | 17.04  | 18.14 | 0.02  | 0.03  | 0.01  |
| Kiribati                         | 20.35 | 22.97  | 17.68 | 23.17  | 26.98  | 19.25 | 0.14  | 0.18  | 0.09  |
| Kuwait                           | 20.53 | 20.52  | 20.54 | 21.71  | 22.5   | 21.09 | 0.04  | 0.08  | 0.01  |
| Kyrgyzstan                       | 15.77 | 14.04  | 17.57 | 17.45  | 14.7   | 20.26 | 0.11  | 0.05  | 0.15  |
| Laos                             | 12.86 | 12.75  | 12.97 | 13.93  | 14.05  | 13.8  | 0.10  | 0.12  | 0.08  |
| Latvia                           | 49.87 | 49.56  | 50.23 | 66.76  | 70.31  | 62.63 | 0.32  | 0.40  | 0.23  |
| Lebanon                          | 25.81 | 26.65  | 24.95 | 33.2   | 35.01  | 31.41 | 0.27  | 0.30  | 0.24  |
| Lesotho                          | 56.18 | 53.23  | 59.32 | 55.4   | 56.32  | 54.46 | -0.02 | 0.06  | -0.09 |
| Liberia                          | 31.32 | 26.08  | 36.59 | 39.09  | 33.15  | 44.94 | 0.25  | 0.27  | 0.24  |
| Libya                            | 25.16 | 23.66  | 26.5  | 29.6   | 29.17  | 30.03 | 0.17  | 0.22  | 0.13  |
| Lithuania                        | 31.36 | 30.51  | 32.3  | 47.66  | 48.98  | 46.12 | 0.50  | 0.59  | 0.41  |
| Luxembourg                       | 37.17 | 43.25  | 30.85 | 36.15  | 43.41  | 28.85 | -0.03 | 0.00  | -0.07 |
| Macedonia                        | 36.16 | 34.38  | 37.92 | 60.85  | 63.6   | 58.08 | 0.66  | 0.83  | 0.51  |
| Madagascar                       | 23.46 | 21.7   | 25.23 | 25.21  | 23.51  | 26.93 | 0.09  | 0.09  | 0.08  |
| Malawi                           | 19.64 | 18.72  | 20.6  | 21.99  | 20.77  | 23.21 | 0.14  | 0.12  | 0.15  |
| Malaysia                         | 24.33 | 24.9   | 23.78 | 28.97  | 29.33  | 28.6  | 0.19  | 0.18  | 0.20  |

|                                  |       |       |       |        |        |        |       |      |       |
|----------------------------------|-------|-------|-------|--------|--------|--------|-------|------|-------|
| Maldives                         | 11.1  | 10.19 | 11.97 | 14.72  | 13.69  | 15.74  | 0.32  | 0.34 | 0.32  |
| Mali                             | 32.58 | 28.01 | 37.25 | 33.15  | 28.61  | 37.6   | 0.03  | 0.03 | 0.03  |
| Malta                            | 27.97 | 30.02 | 25.85 | 35.71  | 41.48  | 29.9   | 0.25  | 0.36 | 0.13  |
| Marshall Islands                 | 18.22 | 20.52 | 16.02 | 21.98  | 25.93  | 18.17  | 0.20  | 0.26 | 0.13  |
| Mauritania                       | 37.45 | 32.73 | 42.19 | 45.66  | 39.12  | 52.12  | 0.23  | 0.20 | 0.25  |
| Mauritius                        | 19.47 | 20.48 | 18.46 | 27.45  | 31.24  | 23.56  | 0.39  | 0.51 | 0.26  |
| Mexico                           | 22.38 | 23.03 | 21.72 | 28.3   | 29.6   | 27     | 0.26  | 0.28 | 0.23  |
| Moldova                          | 16.39 | 14.05 | 18.95 | 21.54  | 18.68  | 24.62  | 0.30  | 0.31 | 0.28  |
| Mongolia                         | 13    | 9.64  | 16.44 | 15.44  | 11.04  | 19.93  | 0.18  | 0.14 | 0.20  |
| Montenegro                       | 69.85 | 77.97 | 61.65 | 92.95  | 99.47  | 86.27  | 0.32  | 0.26 | 0.38  |
| Morocco                          | 27.44 | 28.5  | 26.37 | 40.92  | 43.85  | 37.93  | 0.48  | 0.52 | 0.42  |
| Mozambique                       | 8.9   | 8.52  | 9.32  | 10.41  | 9.81   | 11.04  | 0.18  | 0.16 | 0.20  |
| Myanmar                          | 15.65 | 14.34 | 17.01 | 21.24  | 20     | 22.53  | 0.39  | 0.42 | 0.37  |
| Namibia                          | 55.2  | 51.38 | 59.18 | 61.04  | 58.47  | 63.75  | 0.11  | 0.14 | 0.08  |
| Nepal                            | 10.71 | 10.95 | 10.47 | 12.84  | 13.05  | 12.62  | 0.21  | 0.20 | 0.22  |
| Netherlands                      | 40.61 | 48.44 | 32.6  | 51.05  | 59.87  | 42.08  | 0.25  | 0.23 | 0.27  |
| New Zealand                      | 41.71 | 44.11 | 39.25 | 52.54  | 55.51  | 49.46  | 0.24  | 0.24 | 0.24  |
| Nicaragua                        | 24.56 | 23.93 | 25.21 | 35.9   | 35.85  | 35.96  | 0.47  | 0.50 | 0.44  |
| Niger                            | 28.67 | 24.76 | 32.72 | 36.64  | 29.67  | 43.5   | 0.29  | 0.21 | 0.35  |
| Nigeria                          | 39.49 | 34.89 | 44.01 | 43.78  | 38.56  | 48.81  | 0.11  | 0.11 | 0.11  |
| North Korea                      | 12.61 | 14.44 | 10.66 | 18.89  | 24.85  | 12.66  | 0.50  | 0.72 | 0.19  |
| Northern Mariana Islands         | 29.62 | 26.59 | 32.33 | 30.25  | 26.22  | 34.31  | 0.04  | 0.00 | 0.09  |
| Norway                           | 35.89 | 41.97 | 29.68 | 38.47  | 45.87  | 31.16  | 0.06  | 0.09 | 0.04  |
| Oman                             | 10.32 | 10.96 | 9.81  | 12.01  | 12.76  | 11.63  | 0.16  | 0.16 | 0.18  |
| Pakistan                         | 10.78 | 10.17 | 11.34 | 12.05  | 11.34  | 12.72  | 0.12  | 0.12 | 0.13  |
| Palestine                        | 17.25 | 16.59 | 17.9  | 18.46  | 17.83  | 19.07  | 0.06  | 0.07 | 0.05  |
| Panama                           | 34.09 | 30.08 | 38.01 | 51.37  | 46.22  | 56.49  | 0.53  | 0.56 | 0.52  |
| Papua New Guinea                 | 12.45 | 13.44 | 11.51 | 14.39  | 15.95  | 12.89  | 0.16  | 0.19 | 0.12  |
| Paraguay                         | 34.09 | 32.97 | 35.18 | 37.41  | 36.9   | 37.9   | 0.09  | 0.11 | 0.07  |
| Peru                             | 13.81 | 14.36 | 13.26 | 21.77  | 23.52  | 20.02  | 0.58  | 0.64 | 0.51  |
| Philippines                      | 14.26 | 14.7  | 13.82 | 15.95  | 17.17  | 14.75  | 0.13  | 0.18 | 0.08  |
| Poland                           | 38.04 | 40.77 | 35.17 | 63.25  | 72.81  | 52.97  | 0.65  | 0.77 | 0.49  |
| Portugal                         | 27.54 | 31.09 | 23.72 | 35.56  | 43.51  | 27.09  | 0.27  | 0.38 | 0.12  |
| Puerto Rico                      | 70.37 | 79.05 | 61.14 | 101.2  | 122.48 | 78.21  | 0.43  | 0.54 | 0.27  |
| Qatar                            | 23.97 | 21.26 | 25.3  | 26.44  | 22.42  | 27.94  | 0.09  | 0.04 | 0.09  |
| Romania                          | 44.93 | 42.14 | 47.8  | 79.72  | 83.04  | 76.19  | 0.76  | 0.96 | 0.58  |
| Russia                           | 39.69 | 37.05 | 42.70 | 58.82  | 56.99  | 60.96  | 0.47  | 0.53 | 0.41  |
| Rwanda                           | 19.71 | 18.94 | 20.5  | 22.38  | 22.2   | 22.58  | 0.14  | 0.18 | 0.11  |
| Saint Lucia                      | 52.88 | 50.43 | 55.4  | 74.25  | 72.74  | 75.82  | 0.42  | 0.45 | 0.40  |
| Saint Vincent and the Grenadines | 29.13 | 29.05 | 29.21 | 39.06  | 36.77  | 41.3   | 0.35  | 0.27 | 0.43  |
| Samoa                            | 24.87 | 28.86 | 21.19 | 33.33  | 41.9   | 25.27  | 0.33  | 0.44 | 0.19  |
| Sao Tome and Principe            | 44.97 | 39.78 | 50.27 | 47.82  | 43.73  | 51.94  | 0.06  | 0.10 | 0.04  |
| Saudi Arabia                     | 29.01 | 28.87 | 29.12 | 35.89  | 35.16  | 36.46  | 0.22  | 0.20 | 0.23  |
| Senegal                          | 35.69 | 30.74 | 40.68 | 41.19  | 36.87  | 45.68  | 0.16  | 0.20 | 0.13  |
| Serbia                           | 74.46 | 73.5  | 75.44 | 111.51 | 117.59 | 105.13 | 0.48  | 0.58 | 0.38  |
| Seychelles                       | 23.11 | 26.63 | 19.57 | 26.58  | 31.66  | 21.64  | 0.14  | 0.18 | 0.10  |
| Sierra Leone                     | 32.27 | 26.78 | 37.86 | 34.79  | 29.7   | 39.98  | 0.10  | 0.13 | 0.08  |
| Singapore                        | 32.23 | 33.35 | 31.14 | 53.99  | 62.83  | 44.83  | 0.64  | 0.85 | 0.40  |
| Slovakia                         | 27.34 | 28.53 | 26.08 | 39.93  | 44.81  | 34.77  | 0.44  | 0.55 | 0.32  |
| Slovenia                         | 87.29 | 94.65 | 79.50 | 160.09 | 180.25 | 139.56 | 0.81  | 0.88 | 0.73  |
| Solomon Islands                  | 14.32 | 14.95 | 13.73 | 15.91  | 17.27  | 14.6   | 0.11  | 0.15 | 0.07  |
| Somalia                          | 22.34 | 20.91 | 23.8  | 22.56  | 20.84  | 24.31  | 0.01  | 0.00 | 0.02  |
| South Africa                     | 77.25 | 78.15 | 76.32 | 99.15  | 102    | 96.2   | 0.28  | 0.30 | 0.25  |
| South Korea                      | 24.08 | 26.18 | 22    | 35.11  | 43.47  | 26.64  | 0.41  | 0.62 | 0.17  |
| South Sudan                      | 23.16 | 21.63 | 24.7  | 25.45  | 23.45  | 27.45  | 0.10  | 0.09 | 0.11  |
| Spain                            | 47.92 | 54.37 | 41.19 | 59.41  | 71.83  | 46.67  | 0.23  | 0.31 | 0.12  |
| Sri Lanka                        | 24.83 | 25.31 | 24.35 | 33.37  | 36.46  | 30.05  | 0.36  | 0.45 | 0.26  |
| Sudan                            | 15.46 | 15.25 | 15.67 | 17.5   | 17.32  | 17.68  | 0.14  | 0.14 | 0.13  |
| Suriname                         | 35.79 | 36.38 | 35.22 | 45.53  | 47.24  | 43.83  | 0.27  | 0.29 | 0.24  |
| Swaziland                        | 47.29 | 42.63 | 52.5  | 51.69  | 48.98  | 54.45  | 0.09  | 0.15 | 0.03  |
| Sweden                           | 56.23 | 56.58 | 55.87 | 56.07  | 58.85  | 53.29  | -0.01 | 0.03 | -0.06 |

|                                |          |          |          |          |          |          |       |       |       |
|--------------------------------|----------|----------|----------|----------|----------|----------|-------|-------|-------|
| Switzerland                    | 41.64    | 49.1     | 33.83    | 44.31    | 52.84    | 35.58    | 0.06  | 0.07  | 0.04  |
| Syria                          | 24.69    | 23.62    | 25.72    | 29.29    | 29.16    | 29.42    | 0.18  | 0.23  | 0.14  |
| Taiwan                         | 34.72    | 41.12    | 28.78    | 77.2     | 104.86   | 49.45    | 1.27  | 1.58  | 0.77  |
| Tajikistan                     | 10.98    | 9.52     | 12.45    | 12.58    | 9.92     | 15.17    | 0.14  | 0.04  | 0.22  |
| Tanzania                       | 23.09    | 22.02    | 24.19    | 24.63    | 22.58    | 26.71    | 0.08  | 0.04  | 0.13  |
| Thailand                       | 29.56    | 33.41    | 25.64    | 45.43    | 54.62    | 35.99    | 0.53  | 0.63  | 0.40  |
| The Bahamas                    | 41.35    | 39.68    | 43.05    | 59.84    | 58.53    | 61.2     | 0.43  | 0.46  | 0.41  |
| The Gambia                     | 32.17    | 25.55    | 38.7     | 37.91    | 31.37    | 44.59    | 0.18  | 0.23  | 0.16  |
| Timor-Leste                    | 12.24    | 11.07    | 13.37    | 15.28    | 14.71    | 15.83    | 0.26  | 0.34  | 0.19  |
| Togo                           | 30.03    | 27.07    | 33.07    | 34.29    | 30.84    | 37.82    | 0.15  | 0.15  | 0.16  |
| Tonga                          | 16.74    | 19.61    | 13.94    | 21.09    | 27.17    | 15.04    | 0.26  | 0.38  | 0.08  |
| Trinidad and Tobago            | 35.55    | 34.97    | 36.14    | 47.21    | 47.4     | 47       | 0.31  | 0.34  | 0.29  |
| Tunisia                        | 26.46    | 27.96    | 24.98    | 39.8     | 45.3     | 34.17    | 0.48  | 0.60  | 0.35  |
| Turkey                         | 20.07    | 20.47    | 19.66    | 26.39    | 27.62    | 25.11    | 0.31  | 0.34  | 0.27  |
| Turkmenistan                   | 9.04     | 8.46     | 9.64     | 10.15    | 9.08     | 11.25    | 0.11  | 0.06  | 0.16  |
| Uganda                         | 21.73    | 20.04    | 23.43    | 21.3     | 19.66    | 22.95    | 0.00  | -0.01 | 0.00  |
| Ukraine                        | 28.39    | 25.94    | 31.23    | 35.85    | 34.38    | 37.59    | 0.25  | 0.32  | 0.20  |
| United Arab Emirates           | 26.27    | 26.05    | 26.38    | 29.3     | 26.67    | 30.25    | 0.10  | 0.01  | 0.13  |
| United Kingdom                 | 29.89    | 38.15    | 21.16    | 32.16    | 40.63    | 23.48    | 0.07  | 0.06  | 0.10  |
| United States                  | 118.14   | 130.13   | 105.54   | 129.96   | 143.31   | 116.17   | 0.09  | 0.10  | 0.09  |
| Uruguay                        | 61.39    | 65.78    | 56.74    | 80.22    | 92.55    | 67.01    | 0.30  | 0.40  | 0.17  |
| Uzbekistan                     | 6.87     | 6.52     | 7.22     | 7.07     | 6.45     | 7.72     | 0.02  | -0.02 | 0.06  |
| Vanuatu                        | 17.72    | 19.61    | 15.94    | 18.32    | 20.71    | 15.99    | 0.00  | 0.03  | -0.04 |
| Venezuela                      | 19.17    | 22.93    | 15.47    | 30.97    | 36.24    | 25.67    | 0.60  | 0.57  | 0.63  |
| Vietnam                        | 23.4     | 23.67    | 23.11    | 34.88    | 37.32    | 32.39    | 0.53  | 0.60  | 0.45  |
| Virgin Islands, U.S.           | 62.15    | 54.72    | 70.03    | 111.87   | 104.09   | 120.43   | 0.78  | 0.88  | 0.70  |
| Yemen                          | 14.32    | 13.85    | 14.79    | 15.07    | 14.13    | 15.99    | 0.05  | 0.02  | 0.08  |
| Zambia                         | 19.79    | 18.9     | 20.69    | 21.85    | 20.73    | 22.97    | 0.12  | 0.11  | 0.13  |
| Zimbabwe                       | 42.74    | 36.45    | 49.09    | 40.45    | 35.06    | 46       | -0.05 | -0.04 | -0.06 |
| <b>Cerebrovascular disease</b> |          |          |          |          |          |          |       |       |       |
| Afghanistan                    | 379.00   | 416.87   | 342.95   | 392.23   | 435.55   | 351.55   | 0.04  | 0.05  | 0.03  |
| Albania                        | 476.97   | 494.59   | 460.20   | 856.76   | 853.92   | 859.65   | 0.78  | 0.71  | 0.86  |
| Algeria                        | 340.60   | 372.83   | 309.16   | 474.98   | 522.22   | 428.40   | 0.37  | 0.38  | 0.36  |
| American Samoa                 | 547.56   | 503.52   | 589.25   | 554.43   | 561.31   | 547.59   | 0.01  | 0.11  | -0.07 |
| Andorra                        | 423.48   | 425.21   | 421.66   | 517.63   | 506      | 529.75   | 0.21  | 0.18  | 0.24  |
| Angola                         | 316.94   | 364.87   | 267.83   | 304.59   | 354.67   | 253.85   | -0.03 | -0.02 | -0.04 |
| Antigua and Barbuda            | 498.48   | 516.45   | 479.25   | 460.40   | 476.79   | 442.53   | -0.08 | -0.08 | -0.08 |
| Argentina                      | 467.13   | 479.83   | 453.93   | 466.49   | 483.01   | 449.26   | 0.00  | 0.00  | -0.01 |
| Armenia                        | 657.57   | 732.03   | 578.66   | 945.29   | 1,021.36 | 857.67   | 0.42  | 0.38  | 0.46  |
| Australia                      | 445.65   | 461.64   | 429.57   | 478.6    | 490.67   | 466.5    | 0.07  | 0.06  | 0.08  |
| Austria                        | 536.61   | 561.83   | 509.13   | 637.41   | 618.73   | 657.03   | 0.18  | 0.10  | 0.27  |
| Azerbaijan                     | 602.37   | 683.78   | 517.42   | 724.69   | 794.59   | 653.98   | 0.19  | 0.15  | 0.25  |
| Bahrain                        | 360.11   | 377.8    | 347.1    | 441.56   | 490.67   | 411.5    | 0.22  | 0.29  | 0.18  |
| Bangladesh                     | 492.87   | 473.13   | 511.74   | 550.93   | 523.26   | 578.07   | 0.13  | 0.11  | 0.14  |
| Barbados                       | 513.34   | 540.97   | 483.58   | 637.13   | 659.42   | 612.91   | 0.23  | 0.21  | 0.25  |
| Belarus                        | 1,155.79 | 1,369.17 | 914.11   | 1,426.88 | 1,643.82 | 1,175.23 | 0.22  | 0.19  | 0.27  |
| Belgium                        | 488.02   | 505.35   | 469.88   | 560.64   | 566.02   | 555.05   | 0.14  | 0.11  | 0.16  |
| Belize                         | 270.02   | 274.08   | 266.03   | 290.79   | 297.51   | 284.04   | 0.08  | 0.09  | 0.08  |
| Benin                          | 381.76   | 395.13   | 367.53   | 413.23   | 418.54   | 407.89   | 0.09  | 0.06  | 0.12  |
| Bermuda                        | 406.14   | 415.12   | 397.05   | 480.18   | 497.12   | 462.92   | 0.18  | 0.19  | 0.16  |
| Bhutan                         | 345.04   | 324.81   | 363.83   | 398.87   | 362.31   | 430.36   | 0.14  | 0.10  | 0.17  |
| Bolivia                        | 217.82   | 235.69   | 200.08   | 268.23   | 292.33   | 244.22   | 0.21  | 0.22  | 0.20  |
| Bosnia and Herzegovina         | 652.08   | 740.11   | 563.95   | 1,057.09 | 1,132.03 | 981.45   | 0.60  | 0.51  | 0.72  |
| Botswana                       | 290.36   | 316.79   | 263.31   | 366.42   | 407.94   | 324.85   | 0.25  | 0.28  | 0.23  |
| Brazil                         | 275.15   | 271.03   | 279.35   | 285.34   | 279.44   | 291.43   | 0.03  | 0.02  | 0.03  |
| Brunei                         | 291.76   | 294.82   | 289.02   | 441.76   | 460.73   | 423.92   | 0.47  | 0.51  | 0.43  |
| Bulgaria                       | 1,167.22 | 1,177.02 | 1,157.15 | 1,390.32 | 1,458.16 | 1,319.11 | 0.18  | 0.23  | 0.13  |
| Burkina Faso                   | 366.65   | 381.51   | 351.11   | 306.15   | 325.89   | 286.15   | -0.16 | -0.14 | -0.18 |
| Burundi                        | 456.59   | 501.29   | 410.32   | 416.23   | 441.68   | 390.23   | -0.06 | -0.10 | -0.01 |
| Cambodia                       | 370.26   | 361.81   | 379.32   | 474.12   | 490.34   | 457.09   | 0.31  | 0.37  | 0.24  |
| Cameroon                       | 371.59   | 376.66   | 366.46   | 341.23   | 345.46   | 337.01   | -0.07 | -0.07 | -0.06 |

|                                  |          |          |          |          |          |          |       |       |       |
|----------------------------------|----------|----------|----------|----------|----------|----------|-------|-------|-------|
| Canada                           | 375.24   | 392.86   | 357.33   | 484.51   | 486.09   | 482.91   | 0.28  | 0.23  | 0.33  |
| Cape Verde                       | 521.07   | 534.47   | 506.25   | 559.66   | 595.01   | 523.36   | 0.07  | 0.11  | 0.03  |
| Central African Republic         | 478.20   | 527.92   | 426.79   | 426.58   | 481.61   | 370.09   | -0.11 | -0.09 | -0.13 |
| Chad                             | 327.66   | 334.12   | 321.1    | 301.42   | 303.72   | 299.13   | -0.08 | -0.09 | -0.07 |
| Chile                            | 420.05   | 444.57   | 394.86   | 554.67   | 585.36   | 523.17   | 0.30  | 0.30  | 0.30  |
| China                            | 615.00   | 564.91   | 662.52   | 845.81   | 725.57   | 959.07   | 0.40  | 0.30  | 0.49  |
| Colombia                         | 133.46   | 142.45   | 124.35   | 177.44   | 187.13   | 167.46   | 0.32  | 0.30  | 0.33  |
| Comoros                          | 405.16   | 439.74   | 370.80   | 402.57   | 434.68   | 371.05   | 0.00  | -0.01 | 0.00  |
| Congo                            | 502.01   | 580.80   | 422.80   | 437.76   | 526.74   | 348.91   | -0.12 | -0.09 | -0.17 |
| Costa Rica                       | 107.3    | 111.4    | 103.26   | 162.08   | 167.09   | 157.07   | 0.49  | 0.48  | 0.50  |
| Cote d'Ivoire                    | 439.59   | 396.80   | 479.00   | 437.75   | 406.89   | 467.56   | 0.01  | 0.03  | -0.01 |
| Croatia                          | 1,041.12 | 1,156.02 | 919.02   | 1,284.62 | 1,359.74 | 1,204.00 | 0.22  | 0.17  | 0.30  |
| Cuba                             | 544.90   | 560.26   | 529.78   | 690.69   | 706.37   | 675.16   | 0.26  | 0.25  | 0.26  |
| Cyprus                           | 292.27   | 275.14   | 309.83   | 415.91   | 388.19   | 445.54   | 0.39  | 0.39  | 0.40  |
| Czech Republic                   | 894.46   | 977.42   | 806.51   | 905.28   | 968.55   | 839.96   | 0.00  | -0.02 | 0.03  |
| Democratic Republic of the Congo | 301.40   | 357.54   | 243.87   | 283.31   | 325.22   | 241.19   | -0.06 | -0.09 | -0.01 |
| Denmark                          | 564.30   | 560.37   | 568.35   | 576.42   | 555.33   | 597.84   | 0.02  | -0.01 | 0.04  |
| Djibouti                         | 354.45   | 377.14   | 332.01   | 514.81   | 551.55   | 478.39   | 0.45  | 0.46  | 0.43  |
| Dominica                         | 436.17   | 452.91   | 419.31   | 517.22   | 546.04   | 487.95   | 0.19  | 0.21  | 0.18  |
| Dominican Republic               | 308.44   | 308.13   | 308.75   | 404.62   | 407.19   | 402.03   | 0.31  | 0.31  | 0.30  |
| Ecuador                          | 216.11   | 225.92   | 206.41   | 244.58   | 257.78   | 231.37   | 0.13  | 0.14  | 0.12  |
| Egypt                            | 347.49   | 367.62   | 327.49   | 441.26   | 461.24   | 421.69   | 0.27  | 0.25  | 0.29  |
| El Salvador                      | 100.41   | 104.16   | 96.48    | 131.6    | 139.7    | 122.45   | 0.32  | 0.34  | 0.28  |
| Equatorial Guinea                | 442.07   | 512.93   | 374.27   | 428.40   | 461.67   | 396.76   | -0.03 | -0.10 | 0.06  |
| Eritrea                          | 302.02   | 336.77   | 266.84   | 359.79   | 408.48   | 311.27   | 0.20  | 0.22  | 0.18  |
| Estonia                          | 1,098.42 | 1,273.82 | 898.83   | 1,154.32 | 1,353.84 | 920.04   | 0.04  | 0.05  | 0.01  |
| Ethiopia                         | 382.26   | 402.78   | 361.62   | 488.57   | 535.77   | 441.2    | 0.29  | 0.34  | 0.23  |
| Federated States of Micronesia   | 536.12   | 519.83   | 551.71   | 604.13   | 597.94   | 610.04   | 0.12  | 0.14  | 0.10  |
| Fiji                             | 565.30   | 557.60   | 572.76   | 699.90   | 713.13   | 687.12   | 0.23  | 0.27  | 0.19  |
| Finland                          | 553.72   | 589.96   | 515.27   | 657.60   | 649.16   | 666.31   | 0.17  | 0.09  | 0.27  |
| France                           | 451.26   | 458.31   | 443.82   | 561.27   | 563.17   | 559.26   | 0.24  | 0.22  | 0.25  |
| Gabon                            | 596.69   | 680.91   | 508.95   | 472.69   | 558.57   | 388.73   | -0.21 | -0.18 | -0.24 |
| Georgia                          | 1,138.82 | 1,235.41 | 1,032.29 | 1,336.73 | 1,396.30 | 1,271.57 | 0.17  | 0.12  | 0.22  |
| Germany                          | 512.51   | 547.39   | 475.03   | 629.90   | 607.09   | 653.49   | 0.22  | 0.10  | 0.36  |
| Ghana                            | 373.85   | 415.96   | 333.08   | 403.54   | 434.63   | 372.14   | 0.09  | 0.05  | 0.14  |
| Greece                           | 515.03   | 504.42   | 525.91   | 632.03   | 619.75   | 644.92   | 0.22  | 0.22  | 0.21  |
| Greenland                        | 293.14   | 292.88   | 293.36   | 447.27   | 399.37   | 488.80   | 0.50  | 0.35  | 0.62  |
| Grenada                          | 513.20   | 557.73   | 467.51   | 497.07   | 531.59   | 462.76   | -0.02 | -0.04 | 0.01  |
| Guam                             | 604.55   | 602.31   | 606.51   | 932.20   | 926.36   | 937.88   | 0.56  | 0.54  | 0.57  |
| Guatemala                        | 89.35    | 91.63    | 87.04    | 100.75   | 107.46   | 93.75    | 0.15  | 0.19  | 0.11  |
| Guinea                           | 377.45   | 396.21   | 358.27   | 387.24   | 393.21   | 381.30   | 0.03  | -0.01 | 0.07  |
| Guinea-Bissau                    | 416.71   | 431.96   | 401.09   | 407.49   | 420.00   | 394.83   | -0.01 | -0.02 | 0.00  |
| Guyana                           | 389.13   | 393.32   | 384.81   | 542.93   | 558.63   | 527.38   | 0.40  | 0.42  | 0.38  |
| Haiti                            | 307.25   | 318.32   | 295.86   | 356.46   | 379.08   | 333.35   | 0.19  | 0.21  | 0.17  |
| Honduras                         | 118.59   | 126.25   | 111.00   | 141.31   | 140.11   | 142.52   | 0.19  | 0.11  | 0.29  |
| Hungary                          | 1,143.98 | 1,206.65 | 1,076.19 | 1,156.22 | 1,269.61 | 1,031.23 | 0.00  | 0.05  | -0.05 |
| Iceland                          | 316.32   | 309.44   | 323.13   | 383.41   | 366.39   | 400.8    | 0.20  | 0.17  | 0.22  |
| India                            | 385.35   | 358.76   | 410.12   | 439.91   | 391.37   | 485.01   | 0.14  | 0.09  | 0.19  |
| Indonesia                        | 543.59   | 510.87   | 576.04   | 664.09   | 631.04   | 696.66   | 0.24  | 0.25  | 0.23  |
| Iran                             | 313.07   | 317.42   | 308.88   | 447.73   | 464.98   | 430.74   | 0.41  | 0.44  | 0.37  |
| Iraq                             | 387.02   | 413.14   | 361.37   | 386.99   | 422.92   | 351.95   | 0.00  | 0.02  | -0.03 |
| Ireland                          | 389.52   | 394.19   | 384.81   | 407.09   | 389.57   | 425.13   | 0.03  | -0.02 | 0.09  |
| Israel                           | 304.39   | 291.27   | 317.56   | 328.6    | 316.66   | 340.73   | 0.07  | 0.08  | 0.06  |
| Italy                            | 491.22   | 488.10   | 494.53   | 560.25   | 548.86   | 572.36   | 0.13  | 0.12  | 0.14  |
| Jamaica                          | 438.67   | 458.55   | 418.28   | 467.83   | 478.67   | 456.89   | 0.05  | 0.03  | 0.08  |
| Japan                            | 796.70   | 720.47   | 875.67   | 960.10   | 826.37   | 1,100.94 | 0.18  | 0.13  | 0.22  |
| Jordan                           | 318.02   | 346.57   | 292.19   | 314.68   | 346.43   | 284.47   | -0.02 | -0.01 | -0.04 |
| Kazakhstan                       | 784.24   | 905.27   | 655.62   | 913.37   | 1,003.19 | 817.13   | 0.16  | 0.11  | 0.25  |
| Kenya                            | 246.68   | 256.52   | 236.77   | 248.04   | 251.3    | 244.79   | 0.01  | -0.02 | 0.04  |
| Kiribati                         | 600.83   | 577.77   | 624.38   | 668.28   | 628.87   | 708.71   | 0.12  | 0.09  | 0.14  |
| Kuwait                           | 291.29   | 272.46   | 307.76   | 351.77   | 363.2    | 342.85   | 0.19  | 0.31  | 0.10  |



|                                  |          |          |        |          |          |          |       |       |       |
|----------------------------------|----------|----------|--------|----------|----------|----------|-------|-------|-------|
| Kyrgyzstan                       | 714.59   | 801.27   | 624.18 | 694.75   | 738.76   | 649.79   | -0.03 | -0.08 | 0.04  |
| Laos                             | 412.82   | 402.09   | 423.57 | 466.81   | 463.15   | 470.51   | 0.15  | 0.17  | 0.13  |
| Latvia                           | 1,166.89 | 1,375.27 | 926.88 | 1,324.28 | 1,533.88 | 1,080.18 | 0.12  | 0.10  | 0.15  |
| Lebanon                          | 423.31   | 486.69   | 358.19 | 478.97   | 533.89   | 424.62   | 0.12  | 0.09  | 0.17  |
| Lesotho                          | 350.93   | 371.54   | 329.10 | 397.07   | 457.73   | 335.19   | 0.13  | 0.23  | 0.01  |
| Liberia                          | 330.62   | 330.17   | 331.07 | 381.94   | 393.30   | 370.77   | 0.16  | 0.19  | 0.13  |
| Libya                            | 270.89   | 288.10   | 255.48 | 431.57   | 473.54   | 390.10   | 0.58  | 0.63  | 0.52  |
| Lithuania                        | 1,028.86 | 1,226.65 | 808.73 | 1,407.93 | 1,659.68 | 1,115.14 | 0.35  | 0.34  | 0.36  |
| Luxembourg                       | 496.09   | 517.24   | 474.08 | 516.04   | 515.41   | 516.68   | 0.04  | 0.00  | 0.09  |
| Macedonia                        | 746.71   | 785.17   | 708.70 | 1,035.77 | 1,091.42 | 979.62   | 0.37  | 0.38  | 0.37  |
| Madagascar                       | 465.47   | 469.22   | 461.70 | 512.09   | 544.22   | 479.76   | 0.11  | 0.17  | 0.05  |
| Malawi                           | 323.99   | 361.23   | 285.43 | 398.4    | 444.76   | 351.87   | 0.25  | 0.25  | 0.26  |
| Malaysia                         | 384.15   | 366.23   | 401.53 | 498.02   | 473.68   | 522.81   | 0.29  | 0.29  | 0.30  |
| Maldives                         | 282.61   | 221.47   | 340.66 | 318.72   | 297.29   | 340.04   | 0.13  | 0.34  | 0.00  |
| Mali                             | 397.38   | 435.66   | 358.26 | 312.48   | 336.97   | 288.48   | -0.20 | -0.22 | -0.18 |
| Malta                            | 355.83   | 348.59   | 363.33 | 554.46   | 528.23   | 580.89   | 0.53  | 0.49  | 0.56  |
| Marshall Islands                 | 453.25   | 420.55   | 484.52 | 553.30   | 527.97   | 577.76   | 0.22  | 0.25  | 0.19  |
| Mauritania                       | 415.28   | 429.84   | 400.63 | 396.33   | 419.12   | 373.86   | -0.04 | -0.02 | -0.06 |
| Mauritius                        | 582.83   | 559.08   | 606.68 | 773.37   | 743.07   | 804.42   | 0.31  | 0.32  | 0.30  |
| Mexico                           | 97.61    | 104.72   | 90.43  | 101.83   | 99.3     | 104.39   | 0.04  | -0.06 | 0.15  |
| Moldova                          | 892.77   | 1,003.04 | 771.79 | 967.22   | 1,072.21 | 853.72   | 0.07  | 0.05  | 0.09  |
| Mongolia                         | 578.75   | 610.71   | 546.04 | 897.73   | 943.39   | 851.14   | 0.54  | 0.53  | 0.55  |
| Montenegro                       | 661.23   | 741.99   | 579.77 | 1,065.31 | 1,162.38 | 965.93   | 0.59  | 0.55  | 0.65  |
| Morocco                          | 312.21   | 347.93   | 276.36 | 433.01   | 481.93   | 382.94   | 0.37  | 0.37  | 0.37  |
| Mozambique                       | 427.42   | 450.30   | 402.48 | 551.37   | 600.18   | 500.33   | 0.30  | 0.34  | 0.25  |
| Myanmar                          | 559.23   | 520.95   | 599.06 | 694.66   | 660.24   | 730.66   | 0.27  | 0.29  | 0.26  |
| Namibia                          | 372.67   | 398.06   | 346.18 | 424.49   | 477.84   | 368.28   | 0.14  | 0.20  | 0.07  |
| Nepal                            | 366.85   | 360.66   | 373.13 | 453.47   | 426.59   | 482.05   | 0.25  | 0.19  | 0.31  |
| Netherlands                      | 434.74   | 452.47   | 416.59 | 520.41   | 507.01   | 534.04   | 0.19  | 0.12  | 0.26  |
| New Zealand                      | 462.47   | 477.43   | 447.05 | 505.01   | 496.99   | 513.34   | 0.08  | 0.03  | 0.13  |
| Nicaragua                        | 101.78   | 108.37   | 95.1   | 135.55   | 146.18   | 124.62   | 0.34  | 0.35  | 0.33  |
| Niger                            | 293.38   | 300.33   | 286.19 | 320.5    | 313.83   | 327.07   | 0.11  | 0.05  | 0.16  |
| Nigeria                          | 323.55   | 334.45   | 312.86 | 295.16   | 298.26   | 292.16   | -0.09 | -0.11 | -0.06 |
| North Korea                      | 559.22   | 621.59   | 493.16 | 806.12   | 850.22   | 760.02   | 0.45  | 0.37  | 0.55  |
| Northern Mariana Islands         | 495.81   | 444.24   | 542.15 | 487.88   | 426.27   | 549.92   | 0.00  | -0.03 | 0.04  |
| Norway                           | 527.61   | 528.29   | 526.90 | 484.95   | 482.2    | 487.66   | -0.09 | -0.09 | -0.09 |
| Oman                             | 237.13   | 265.91   | 214.17 | 311.34   | 342.61   | 295.48   | 0.31  | 0.28  | 0.37  |
| Pakistan                         | 441.78   | 391.36   | 488.57 | 477.63   | 437.56   | 515.56   | 0.08  | 0.12  | 0.06  |
| Palestine                        | 262.02   | 289.59   | 235.14 | 311.84   | 343.23   | 281.33   | 0.18  | 0.17  | 0.18  |
| Panama                           | 146.49   | 143.72   | 149.2  | 196.26   | 196.87   | 195.66   | 0.36  | 0.39  | 0.34  |
| Papua New Guinea                 | 461.67   | 464.62   | 458.86 | 589.32   | 624.15   | 555.86   | 0.28  | 0.34  | 0.21  |
| Paraguay                         | 254.98   | 253.51   | 256.43 | 373.80   | 357.45   | 389.64   | 0.45  | 0.40  | 0.50  |
| Peru                             | 197.93   | 211.82   | 184.05 | 247.07   | 266.21   | 227.91   | 0.25  | 0.26  | 0.24  |
| Philippines                      | 341.83   | 322.49   | 360.77 | 480.64   | 468.73   | 492.32   | 0.42  | 0.46  | 0.38  |
| Poland                           | 747.06   | 819.89   | 670.45 | 918.90   | 985.20   | 847.56   | 0.22  | 0.19  | 0.25  |
| Portugal                         | 606.14   | 598.03   | 614.86 | 706.58   | 693.15   | 720.90   | 0.15  | 0.15  | 0.15  |
| Puerto Rico                      | 422.61   | 425.74   | 419.28 | 547.04   | 571.26   | 520.87   | 0.28  | 0.33  | 0.23  |
| Qatar                            | 259.76   | 250.67   | 264.25 | 278.14   | 301.53   | 269.4    | 0.06  | 0.18  | 0.01  |
| Romania                          | 1,035.89 | 1,111.38 | 958.24 | 1,294.51 | 1,384.72 | 1,198.48 | 0.24  | 0.24  | 0.24  |
| Russia                           | 1,135.43 | 1,361.92 | 878.22 | 1,395.94 | 1,585.03 | 1,173.90 | 0.22  | 0.16  | 0.32  |
| Rwanda                           | 370.20   | 398.31   | 341.09 | 394.46   | 448.44   | 335.74   | 0.07  | 0.13  | -0.01 |
| Saint Lucia                      | 481.42   | 493.14   | 469.34 | 511.66   | 532.95   | 489.54   | 0.08  | 0.09  | 0.06  |
| Saint Vincent and the Grenadines | 423.84   | 464.51   | 382.77 | 483.92   | 504.99   | 463.23   | 0.15  | 0.09  | 0.22  |
| Samoa                            | 614.96   | 608.18   | 621.21 | 671.69   | 680.31   | 663.61   | 0.09  | 0.11  | 0.06  |
| Sao Tome and Principe            | 387.19   | 396.85   | 377.34 | 367.59   | 388.51   | 346.52   | -0.05 | -0.02 | -0.08 |
| Saudi Arabia                     | 250.41   | 261.2    | 241.93 | 311.17   | 297.37   | 321.76   | 0.22  | 0.12  | 0.31  |
| Senegal                          | 358.09   | 360.92   | 355.23 | 340.11   | 358.61   | 320.92   | -0.04 | 0.00  | -0.09 |
| Serbia                           | 907.91   | 981.51   | 832.35 | 1,196.91 | 1,287.98 | 1,101.39 | 0.30  | 0.30  | 0.31  |
| Seychelles                       | 528.80   | 505.57   | 552.12 | 557.09   | 542.88   | 570.92   | 0.05  | 0.07  | 0.03  |
| Sierra Leone                     | 401.75   | 382.66   | 421.24 | 425.88   | 432.23   | 419.40   | 0.08  | 0.15  | 0.02  |
| Singapore                        | 494.95   | 515.53   | 474.91 | 699.08   | 718.13   | 679.35   | 0.38  | 0.37  | 0.40  |

|                      |          |          |        |          |          |          |       |       |       |
|----------------------|----------|----------|--------|----------|----------|----------|-------|-------|-------|
| Slovakia             | 759.24   | 818.19   | 697.51 | 894.17   | 956.83   | 828.05   | 0.16  | 0.16  | 0.17  |
| Slovenia             | 750.18   | 833.74   | 661.58 | 922.26   | 981.87   | 861.57   | 0.21  | 0.17  | 0.28  |
| Solomon Islands      | 550.52   | 529.94   | 570.00 | 588.36   | 582.44   | 594.10   | 0.07  | 0.10  | 0.04  |
| Somalia              | 391.06   | 425.37   | 356.13 | 395.42   | 431.55   | 358.96   | 0.01  | 0.02  | 0.01  |
| South Africa         | 500.54   | 504.39   | 496.6  | 552.69   | 562.70   | 542.33   | 0.10  | 0.11  | 0.09  |
| South Korea          | 609.10   | 664.41   | 554.04 | 962.45   | 991.56   | 933.00   | 0.53  | 0.45  | 0.63  |
| South Sudan          | 399.37   | 431.19   | 367.25 | 464.05   | 507.30   | 420.94   | 0.16  | 0.18  | 0.15  |
| Spain                | 461.12   | 473.48   | 448.25 | 561.98   | 577.81   | 545.74   | 0.21  | 0.21  | 0.20  |
| Sri Lanka            | 372.12   | 344.88   | 398.83 | 647.82   | 637.77   | 658.62   | 0.76  | 0.87  | 0.68  |
| Sudan                | 323.92   | 349.84   | 298.21 | 376.73   | 416.71   | 337.04   | 0.17  | 0.19  | 0.14  |
| Suriname             | 406.49   | 417.45   | 395.89 | 519.49   | 536.42   | 502.62   | 0.27  | 0.28  | 0.27  |
| Swaziland            | 279.96   | 291.60   | 266.95 | 364.37   | 412.67   | 315.05   | 0.30  | 0.41  | 0.17  |
| Sweden               | 645.76   | 575.83   | 717.38 | 591.35   | 496.89   | 686      | -0.09 | -0.14 | -0.06 |
| Switzerland          | 443.70   | 449.38   | 437.76 | 471.33   | 469.22   | 473.48   | 0.06  | 0.04  | 0.07  |
| Syria                | 303.30   | 308.48   | 298.29 | 417.22   | 435.93   | 398.95   | 0.37  | 0.40  | 0.33  |
| Taiwan               | 589.39   | 539.14   | 636.04 | 768.49   | 766.2    | 770.79   | 0.33  | 0.44  | 0.25  |
| Tajikistan           | 499.94   | 565.74   | 433.35 | 421.13   | 453.17   | 389.85   | -0.16 | -0.20 | -0.10 |
| Tanzania             | 333.92   | 362.88   | 304.45 | 373.18   | 401.55   | 344.46   | 0.14  | 0.12  | 0.15  |
| Thailand             | 424.42   | 390.40   | 459.06 | 703.41   | 655.08   | 753.12   | 0.66  | 0.67  | 0.64  |
| The Bahamas          | 379.52   | 396.10   | 362.71 | 506.81   | 536.00   | 476.36   | 0.32  | 0.34  | 0.30  |
| The Gambia           | 338.66   | 322.25   | 354.84 | 334.23   | 319.91   | 348.82   | -0.01 | -0.01 | -0.01 |
| Timor-Leste          | 286.91   | 280.83   | 292.83 | 419.66   | 420.95   | 418.42   | 0.48  | 0.51  | 0.44  |
| Togo                 | 345.44   | 351.07   | 339.66 | 334.87   | 333.31   | 336.47   | -0.02 | -0.05 | 0.00  |
| Tonga                | 530.08   | 563.23   | 497.73 | 572.43   | 603.31   | 541.71   | 0.08  | 0.07  | 0.08  |
| Trinidad and Tobago  | 419.18   | 426.08   | 412.22 | 539.83   | 543.27   | 536.30   | 0.27  | 0.26  | 0.29  |
| Tunisia              | 392.52   | 396.20   | 388.89 | 555.55   | 580.29   | 530.23   | 0.40  | 0.45  | 0.34  |
| Turkey               | 348.2    | 383.18   | 312.36 | 414.07   | 465.14   | 361.2    | 0.18  | 0.20  | 0.15  |
| Turkmenistan         | 545.50   | 608.74   | 480.49 | 677.55   | 717.96   | 635.75   | 0.23  | 0.17  | 0.31  |
| Uganda               | 336.50   | 368.14   | 304.44 | 310.09   | 336.69   | 283.47   | -0.06 | -0.08 | -0.05 |
| Ukraine              | 1,239.98 | 1,448.54 | 997.27 | 1,398.53 | 1,588.21 | 1,174.48 | 0.12  | 0.09  | 0.17  |
| United Arab Emirates | 324.05   | 319.86   | 326.22 | 361.58   | 353.61   | 364.49   | 0.10  | 0.09  | 0.10  |
| United Kingdom       | 857.09   | 924.07   | 786.25 | 937.29   | 950      | 924.26   | 0.09  | 0.03  | 0.17  |
| United States        | 410.38   | 426.97   | 392.94 | 414.12   | 410.45   | 417.9    | 0.00  | -0.04 | 0.05  |
| Uruguay              | 618.19   | 637.72   | 597.47 | 626.67   | 672.53   | 577.53   | 0.01  | 0.05  | -0.04 |
| Uzbekistan           | 466.13   | 518.18   | 412.94 | 533.39   | 567.39   | 498.28   | 0.14  | 0.09  | 0.20  |
| Vanuatu              | 680.15   | 631.28   | 726.35 | 747.17   | 738.48   | 755.65   | 0.06  | 0.14  | 0.00  |
| Venezuela            | 146.09   | 151.41   | 140.84 | 199.67   | 205.78   | 193.5    | 0.35  | 0.35  | 0.35  |
| Vietnam              | 573.47   | 537.18   | 610.88 | 630.61   | 604.20   | 657.59   | 0.13  | 0.14  | 0.11  |
| Virgin Islands, U.S. | 382.44   | 389.32   | 375.16 | 676.25   | 678.18   | 674.12   | 0.75  | 0.72  | 0.77  |
| Yemen                | 289.07   | 326.36   | 251.09 | 356.50   | 402.27   | 311.67   | 0.23  | 0.23  | 0.24  |
| Zambia               | 342.39   | 379.75   | 304.4  | 422.48   | 457.41   | 387.47   | 0.25  | 0.22  | 0.29  |
| Zimbabwe             | 289.71   | 301.57   | 277.76 | 232.68   | 258.8    | 205.79   | -0.20 | -0.14 | -0.26 |
| <b>Endocarditis</b>  |          |          |        |          |          |          |       |       |       |
| Afghanistan          | 1.42     | 2.57     | 0.33   | 1.67     | 3.04     | 0.37     | 0.18  | 0.19  | 0.14  |
| Albania              | 0.46     | 0.4      | 0.52   | 0.65     | 0.44     | 0.86     | 0.39  | 0.09  | 0.64  |
| Algeria              | 2.15     | 3.83     | 0.51   | 3.78     | 6.98     | 0.62     | 0.73  | 0.79  | 0.21  |
| American Samoa       | 5.16     | 7.71     | 2.76   | 5.66     | 8.79     | 2.54     | 0.09  | 0.14  | -0.08 |
| Andorra              | 8.09     | 14.34    | 1.51   | 9.3      | 16.47    | 1.83     | 0.14  | 0.14  | 0.19  |
| Angola               | 0.59     | 0.67     | 0.5    | 0.59     | 0.68     | 0.5      | 0.01  | 0.01  | 0.01  |
| Antigua and Barbuda  | 2.49     | 4.34     | 0.51   | 2.49     | 4.34     | 0.48     | 0.00  | -0.01 | -0.06 |
| Argentina            | 5.47     | 10.98    | -0.25  | 7.74     | 15.14    | 0.01     | 0.41  | 0.37  | -1.02 |
| Armenia              | 0.61     | 0.6      | 0.62   | 1.06     | 0.99     | 1.14     | 0.72  | 0.63  | 0.82  |
| Australia            | 2.67     | 2.67     | 2.68   | 2.16     | 2.05     | 2.27     | -0.20 | -0.24 | -0.16 |
| Austria              | 11.65    | 20.41    | 2.11   | 11.12    | 19.75    | 2.07     | -0.05 | -0.04 | -0.03 |
| Azerbaijan           | 0.63     | 0.68     | 0.58   | 0.86     | 0.84     | 0.87     | 0.35  | 0.22  | 0.49  |
| Bahrain              | 2.3      | 4.54     | 0.65   | 2.51     | 5.66     | 0.58     | 0.08  | 0.24  | -0.12 |
| Bangladesh           | 0.39     | 0.46     | 0.33   | 0.66     | 0.77     | 0.55     | 0.68  | 0.68  | 0.66  |
| Barbados             | 3.19     | 5.62     | 0.57   | 4.41     | 7.84     | 0.68     | 0.37  | 0.39  | 0.18  |
| Belarus              | 0.83     | 0.93     | 0.71   | 1.19     | 1.34     | 1.02     | 0.42  | 0.42  | 0.42  |
| Belgium              | 9.36     | 16.48    | 1.9    | 9.62     | 16.73    | 2.22     | 0.02  | 0.01  | 0.15  |
| Belize               | 1.12     | 2.02     | 0.24   | 1.22     | 2.17     | 0.26     | 0.09  | 0.07  | 0.08  |

|                                  |       |       |       |       |       |       |       |       |       |
|----------------------------------|-------|-------|-------|-------|-------|-------|-------|-------|-------|
| Benin                            | 0.71  | 0.8   | 0.61  | 0.7   | 0.82  | 0.59  | 0.01  | 0.02  | -0.01 |
| Bermuda                          | 1.95  | 3.41  | 0.47  | 2.77  | 5.08  | 0.41  | 0.41  | 0.48  | -0.12 |
| Bhutan                           | 0.45  | 0.51  | 0.4   | 0.75  | 0.85  | 0.66  | 0.65  | 0.65  | 0.66  |
| Bolivia                          | -1.06 | -0.9  | -1.22 | -0.74 | -0.75 | -0.73 | -0.32 | -0.18 | -0.41 |
| Bosnia and Herzegovina           | 0.54  | 0.41  | 0.68  | 0.75  | 0.39  | 1.12  | 0.37  | -0.06 | 0.64  |
| Botswana                         | 0.4   | 0.38  | 0.41  | 0.47  | 0.46  | 0.48  | 0.18  | 0.20  | 0.16  |
| Brazil                           | 0.69  | 0.63  | 0.75  | 1.02  | 0.95  | 1.1   | 0.47  | 0.50  | 0.45  |
| Brunei                           | 1.24  | 1.43  | 1.07  | 1.34  | 1.52  | 1.18  | 0.06  | 0.03  | 0.08  |
| Bulgaria                         | 0.93  | 0.57  | 1.3   | 1.05  | 0.5   | 1.62  | 0.12  | -0.12 | 0.24  |
| Burkina Faso                     | 0.64  | 0.71  | 0.57  | 0.66  | 0.75  | 0.58  | 0.04  | 0.05  | 0.02  |
| Burundi                          | 0.62  | 0.69  | 0.55  | 0.53  | 0.59  | 0.48  | -0.12 | -0.13 | -0.10 |
| Cambodia                         | 0.55  | 0.64  | 0.45  | 0.61  | 0.69  | 0.52  | 0.13  | 0.10  | 0.18  |
| Cameroon                         | 0.72  | 0.8   | 0.64  | 0.7   | 0.77  | 0.62  | -0.02 | -0.02 | 0.00  |
| Canada                           | 2.88  | 3.11  | 2.65  | 2.78  | 2.66  | 2.9   | -0.05 | -0.15 | 0.07  |
| Cape Verde                       | 0.86  | 1.03  | 0.67  | 0.99  | 1.19  | 0.8   | 0.15  | 0.14  | 0.19  |
| Central African Republic         | 0.6   | 0.68  | 0.51  | 0.62  | 0.7   | 0.54  | 0.04  | 0.04  | 0.04  |
| Chad                             | 0.66  | 0.75  | 0.58  | 0.68  | 0.77  | 0.6   | 0.03  | 0.03  | 0.04  |
| Chile                            | 5.01  | 9.86  | 0.02  | 9.26  | 17.5  | 0.79  | 0.82  | 0.75  | 37.99 |
| China                            | 0.26  | 0.21  | 0.32  | 0.44  | 0.4   | 0.48  | 0.72  | 0.95  | 0.57  |
| Colombia                         | 0.81  | 1.09  | 0.53  | 0.97  | 1.24  | 0.68  | 0.18  | 0.13  | 0.27  |
| Comoros                          | 0.71  | 0.78  | 0.64  | 0.67  | 0.75  | 0.6   | -0.05 | -0.03 | -0.07 |
| Congo                            | 0.71  | 0.79  | 0.62  | 0.69  | 0.8   | 0.58  | -0.02 | 0.01  | -0.06 |
| Costa Rica                       | 0.92  | 1.09  | 0.74  | 1.17  | 1.37  | 0.98  | 0.27  | 0.24  | 0.30  |
| Cote d'Ivoire                    | 0.68  | 0.74  | 0.63  | 0.7   | 0.76  | 0.63  | 0.03  | 0.03  | 0.02  |
| Croatia                          | 0.5   | 0.36  | 0.66  | 0.48  | 0.27  | 0.7   | -0.06 | -0.25 | 0.05  |
| Cuba                             | 2.53  | 4.79  | 0.31  | 4.01  | 7.71  | 0.34  | 0.57  | 0.60  | 0.09  |
| Cyprus                           | 3.57  | 6.07  | 1.02  | 4.33  | 7.32  | 1.14  | 0.19  | 0.18  | 0.09  |
| Czech Republic                   | 0.82  | 0.56  | 1.11  | 0.96  | 0.55  | 1.38  | 0.15  | -0.01 | 0.23  |
| Democratic Republic of the Congo | 0.52  | 0.62  | 0.43  | 0.51  | 0.59  | 0.43  | -0.02 | -0.04 | 0.00  |
| Denmark                          | 8.21  | 14.42 | 1.82  | 6.82  | 11.72 | 1.83  | -0.17 | -0.19 | 0.00  |
| Djibouti                         | 0.71  | 0.78  | 0.63  | 0.84  | 0.91  | 0.76  | 0.18  | 0.17  | 0.20  |
| Dominica                         | 1.92  | 3.47  | 0.36  | 2.77  | 5.04  | 0.46  | 0.45  | 0.45  | 0.27  |
| Dominican Republic               | 1.19  | 2.1   | 0.29  | 2.24  | 4.15  | 0.32  | 0.88  | 0.96  | 0.11  |
| Ecuador                          | 0.39  | 0.54  | 0.24  | 0.53  | 0.66  | 0.41  | 0.37  | 0.22  | 0.68  |
| Egypt                            | 2.58  | 4.62  | 0.55  | 3.26  | 6.02  | 0.56  | 0.27  | 0.30  | 0.02  |
| El Salvador                      | 0.61  | 0.76  | 0.46  | 0.78  | 0.96  | 0.57  | 0.28  | 0.27  | 0.27  |
| Equatorial Guinea                | 0.73  | 0.83  | 0.63  | 0.7   | 0.76  | 0.64  | -0.04 | -0.08 | 0.02  |
| Eritrea                          | 0.55  | 0.61  | 0.5   | 0.59  | 0.67  | 0.52  | 0.07  | 0.09  | 0.05  |
| Estonia                          | 1.01  | 1.08  | 0.94  | 1.37  | 1.53  | 1.18  | 0.34  | 0.41  | 0.24  |
| Ethiopia                         | 0.63  | 0.68  | 0.57  | 0.64  | 0.7   | 0.58  | 0.03  | 0.02  | 0.03  |
| Federated States of Micronesia   | 5.08  | 7.55  | 2.72  | 6.95  | 10.63 | 3.45  | 0.36  | 0.40  | 0.26  |
| Fiji                             | 5.41  | 7.83  | 3.07  | 9.35  | 14.01 | 4.85  | 0.72  | 0.78  | 0.57  |
| Finland                          | 9.5   | 17.06 | 1.48  | 9.8   | 17.77 | 1.59  | 0.02  | 0.04  | 0.06  |
| France                           | 6.73  | 11.48 | 1.72  | 6.97  | 11.71 | 1.93  | 0.03  | 0.02  | 0.12  |
| Gabon                            | 0.88  | 1     | 0.76  | 0.86  | 1.02  | 0.71  | -0.02 | 0.02  | -0.07 |
| Georgia                          | 0.96  | 0.95  | 0.97  | 1.28  | 1.21  | 1.37  | 0.33  | 0.26  | 0.41  |
| Germany                          | 10.09 | 17.9  | 1.7   | 10.26 | 18.19 | 2.07  | 0.01  | 0.01  | 0.20  |
| Ghana                            | 0.71  | 0.84  | 0.57  | 0.78  | 0.87  | 0.68  | 0.11  | 0.03  | 0.21  |
| Greece                           | 6.34  | 11.15 | 1.42  | 9.63  | 16.8  | 2.11  | 0.51  | 0.50  | 0.47  |
| Greenland                        | 2.67  | 4.37  | 1.2   | 2.92  | 4.9   | 1.2   | 0.07  | 0.11  | -0.03 |
| Grenada                          | 2.2   | 3.87  | 0.49  | 2.54  | 4.56  | 0.53  | 0.17  | 0.19  | 0.12  |
| Guam                             | 5.99  | 9.5   | 2.92  | 13.99 | 21.46 | 6.73  | 1.36  | 1.27  | 1.34  |
| Guatemala                        | 0.56  | 0.67  | 0.44  | 0.62  | 0.75  | 0.49  | 0.15  | 0.14  | 0.15  |
| Guinea                           | 0.71  | 0.81  | 0.62  | 0.68  | 0.77  | 0.6   | -0.04 | -0.05 | -0.02 |
| Guinea-Bissau                    | 0.72  | 0.81  | 0.63  | 0.75  | 0.83  | 0.66  | 0.06  | 0.04  | 0.08  |
| Guyana                           | 1.3   | 2.24  | 0.34  | 1.76  | 3.11  | 0.42  | 0.35  | 0.39  | 0.24  |
| Haiti                            | 0.98  | 1.64  | 0.3   | 1.22  | 2.12  | 0.29  | 0.28  | 0.32  | 0.00  |
| Honduras                         | 0.56  | 0.67  | 0.45  | 0.75  | 0.87  | 0.62  | 0.33  | 0.29  | 0.38  |
| Hungary                          | 0.82  | 0.62  | 1.04  | 0.97  | 0.66  | 1.32  | 0.18  | 0.06  | 0.26  |
| Iceland                          | 5.23  | 9.11  | 1.39  | 5.33  | 9.03  | 1.56  | 0.01  | -0.02 | 0.10  |
| India                            | 0.45  | 0.5   | 0.4   | 0.68  | 0.76  | 0.61  | 0.52  | 0.51  | 0.54  |

|                          |      |       |      |      |       |      |       |       |       |
|--------------------------|------|-------|------|------|-------|------|-------|-------|-------|
| Indonesia                | 0.58 | 0.65  | 0.52 | 0.78 | 0.87  | 0.69 | 0.35  | 0.35  | 0.35  |
| Iran                     | 1.61 | 2.99  | 0.28 | 3.46 | 6.53  | 0.43 | 1.11  | 1.14  | 0.51  |
| Iraq                     | 2.3  | 4.24  | 0.39 | 2.4  | 4.44  | 0.42 | 0.05  | 0.05  | 0.08  |
| Ireland                  | 5.64 | 9.94  | 1.31 | 5.14 | 8.86  | 1.3  | -0.10 | -0.12 | -0.02 |
| Israel                   | 4.17 | 7.21  | 1.12 | 4.45 | 7.71  | 1.14 | 0.06  | 0.07  | 0.01  |
| Italy                    | 5.54 | 9.7   | 1.11 | 7.47 | 12.95 | 1.63 | 0.34  | 0.33  | 0.45  |
| Jamaica                  | 1.96 | 3.51  | 0.37 | 2.53 | 4.6   | 0.44 | 0.28  | 0.30  | 0.18  |
| Japan                    | 1.92 | 2.27  | 1.57 | 2.45 | 2.86  | 2.03 | 0.25  | 0.24  | 0.26  |
| Jordan                   | 2.28 | 4.34  | 0.41 | 2.8  | 5.3   | 0.42 | 0.21  | 0.21  | 0.02  |
| Kazakhstan               | 0.7  | 0.8   | 0.58 | 0.86 | 0.91  | 0.8  | 0.23  | 0.13  | 0.38  |
| Kenya                    | 0.47 | 0.52  | 0.42 | 0.51 | 0.55  | 0.47 | 0.08  | 0.06  | 0.11  |
| Kiribati                 | 4.98 | 7.45  | 2.46 | 5.7  | 8.63  | 2.69 | 0.15  | 0.16  | 0.10  |
| Kuwait                   | 1.78 | 3.35  | 0.4  | 2.34 | 4.7   | 0.5  | 0.30  | 0.39  | 0.22  |
| Kyrgyzstan               | 0.54 | 0.59  | 0.48 | 0.57 | 0.58  | 0.56 | 0.07  | -0.01 | 0.17  |
| Laos                     | 0.65 | 0.71  | 0.6  | 0.7  | 0.76  | 0.63 | 0.09  | 0.09  | 0.08  |
| Latvia                   | 0.57 | 0.57  | 0.56 | 0.64 | 0.7   | 0.58 | 0.12  | 0.20  | 0.01  |
| Lebanon                  | 3.37 | 6.16  | 0.5  | 4.61 | 8.77  | 0.49 | 0.35  | 0.41  | -0.03 |
| Lesotho                  | 0.4  | 0.43  | 0.36 | 0.51 | 0.54  | 0.48 | 0.28  | 0.24  | 0.32  |
| Liberia                  | 0.68 | 0.75  | 0.61 | 0.68 | 0.77  | 0.59 | 0.00  | 0.03  | -0.03 |
| Libya                    | 1.83 | 3.34  | 0.48 | 3.26 | 6.01  | 0.54 | 0.77  | 0.78  | 0.12  |
| Lithuania                | 1.62 | 1.73  | 1.5  | 2.54 | 2.84  | 2.2  | 0.55  | 0.63  | 0.45  |
| Luxembourg               | 9.88 | 17.54 | 1.91 | 9.97 | 17.92 | 1.98 | 0.01  | 0.02  | 0.04  |
| Macedonia                | 0.58 | 0.43  | 0.73 | 0.71 | 0.44  | 0.99 | 0.21  | 0.01  | 0.34  |
| Madagascar               | 0.79 | 0.84  | 0.74 | 0.77 | 0.82  | 0.72 | -0.01 | -0.01 | -0.01 |
| Malawi                   | 0.51 | 0.58  | 0.44 | 0.54 | 0.6   | 0.47 | 0.07  | 0.04  | 0.11  |
| Malaysia                 | 0.85 | 0.88  | 0.81 | 1.11 | 1.08  | 1.14 | 0.31  | 0.23  | 0.40  |
| Maldives                 | 0.53 | 0.59  | 0.47 | 0.66 | 0.75  | 0.57 | 0.25  | 0.26  | 0.22  |
| Mali                     | 0.71 | 0.83  | 0.58 | 0.65 | 0.76  | 0.55 | -0.06 | -0.07 | -0.05 |
| Malta                    | 5.76 | 10.02 | 1.34 | 9.45 | 16.76 | 2.08 | 0.61  | 0.65  | 0.51  |
| Marshall Islands         | 3.96 | 5.95  | 2.06 | 5.8  | 8.78  | 2.93 | 0.46  | 0.47  | 0.41  |
| Mauritania               | 0.78 | 0.87  | 0.68 | 0.78 | 0.89  | 0.67 | 0.01  | 0.02  | -0.01 |
| Mauritius                | 0.81 | 1     | 0.62 | 0.94 | 0.97  | 0.91 | 0.15  | -0.03 | 0.44  |
| Mexico                   | 0.66 | 0.82  | 0.5  | 0.85 | 1.01  | 0.69 | 0.28  | 0.22  | 0.37  |
| Moldova                  | 0.56 | 0.58  | 0.54 | 0.76 | 0.77  | 0.75 | 0.33  | 0.30  | 0.37  |
| Mongolia                 | 0.37 | 0.34  | 0.39 | 0.57 | 0.54  | 0.61 | 0.55  | 0.56  | 0.55  |
| Montenegro               | 0.53 | 0.37  | 0.69 | 0.72 | 0.4   | 1.05 | 0.34  | 0.08  | 0.49  |
| Morocco                  | 2.11 | 3.62  | 0.59 | 3.51 | 6.27  | 0.68 | 0.64  | 0.71  | 0.14  |
| Mozambique               | 0.53 | 0.61  | 0.44 | 0.61 | 0.68  | 0.53 | 0.16  | 0.13  | 0.22  |
| Myanmar                  | 0.59 | 0.65  | 0.53 | 0.76 | 0.84  | 0.68 | 0.32  | 0.31  | 0.33  |
| Namibia                  | 0.44 | 0.45  | 0.44 | 0.49 | 0.48  | 0.5  | 0.11  | 0.07  | 0.15  |
| Nepal                    | 0.43 | 0.51  | 0.35 | 0.64 | 0.75  | 0.53 | 0.50  | 0.48  | 0.52  |
| Netherlands              | 8.11 | 14.57 | 1.51 | 8.41 | 14.7  | 2.01 | 0.03  | 0.01  | 0.31  |
| New Zealand              | 1.03 | 1.08  | 0.99 | 1.11 | 1.04  | 1.17 | 0.05  | -0.05 | 0.17  |
| Nicaragua                | 0.59 | 0.73  | 0.45 | 0.8  | 0.99  | 0.61 | 0.37  | 0.37  | 0.37  |
| Niger                    | 0.65 | 0.73  | 0.57 | 0.58 | 0.66  | 0.51 | -0.08 | -0.08 | -0.08 |
| Nigeria                  | 0.66 | 0.73  | 0.6  | 0.65 | 0.7   | 0.59 | -0.02 | -0.03 | 0.00  |
| North Korea              | 0.39 | 0.32  | 0.45 | 0.58 | 0.59  | 0.57 | 0.50  | 0.82  | 0.26  |
| Northern Mariana Islands | 3.64 | 5.48  | 1.97 | 3.59 | 5     | 2.17 | 0.00  | -0.08 | 0.12  |
| Norway                   | 9.95 | 17.7  | 2.03 | 7.33 | 12.97 | 1.75 | -0.27 | -0.27 | -0.15 |
| Oman                     | 1.76 | 3.3   | 0.53 | 2.02 | 4.69  | 0.66 | 0.14  | 0.42  | 0.24  |
| Pakistan                 | 0.48 | 0.53  | 0.43 | 0.66 | 0.74  | 0.58 | 0.39  | 0.42  | 0.35  |
| Palestine                | 1.72 | 3.09  | 0.38 | 2.21 | 4.07  | 0.4  | 0.27  | 0.31  | 0.03  |
| Panama                   | 0.77 | 0.89  | 0.65 | 1.04 | 1.18  | 0.9  | 0.37  | 0.34  | 0.42  |
| Papua New Guinea         | 3.04 | 4.63  | 1.53 | 4.28 | 6.53  | 2.11 | 0.41  | 0.41  | 0.39  |
| Paraguay                 | 0.75 | 0.67  | 0.83 | 1.03 | 0.9   | 1.16 | 0.36  | 0.33  | 0.39  |
| Peru                     | 0.53 | 0.65  | 0.41 | 0.63 | 0.76  | 0.5  | 0.20  | 0.18  | 0.22  |
| Philippines              | 0.51 | 0.63  | 0.39 | 0.68 | 0.82  | 0.54 | 0.35  | 0.32  | 0.41  |
| Poland                   | 0.82 | 0.56  | 1.1  | 1.02 | 0.45  | 1.62 | 0.22  | -0.19 | 0.46  |
| Portugal                 | 6.85 | 11.88 | 1.45 | 8.85 | 15.44 | 1.83 | 0.27  | 0.28  | 0.24  |
| Puerto Rico              | 2.56 | 4.58  | 0.41 | 4.3  | 7.83  | 0.48 | 0.67  | 0.70  | 0.15  |
| Qatar                    | 1.27 | 2.87  | 0.48 | 1.3  | 3.52  | 0.47 | 0.01  | 0.21  | -0.04 |

|                                     |        |        |        |        |        |        |       |       |       |
|-------------------------------------|--------|--------|--------|--------|--------|--------|-------|-------|-------|
| Romania                             | 1.15   | 0.73   | 1.58   | 1.61   | 0.83   | 2.44   | 0.39  | 0.13  | 0.53  |
| Russia                              | 0.7    | 0.82   | 0.55   | 1.03   | 1.09   | 0.95   | 0.46  | 0.32  | 0.71  |
| Rwanda                              | 0.59   | 0.66   | 0.51   | 0.56   | 0.63   | 0.49   | -0.04 | -0.05 | -0.04 |
| Saint Lucia                         | 2.09   | 3.59   | 0.53   | 2.83   | 4.99   | 0.59   | 0.38  | 0.40  | 0.13  |
| Saint Vincent and the Grenadines    | 1.83   | 3.15   | 0.5    | 2.17   | 4.01   | 0.37   | 0.19  | 0.27  | -0.26 |
| Samoa                               | 6.36   | 9.85   | 3.13   | 9.81   | 15.47  | 4.51   | 0.53  | 0.56  | 0.43  |
| Sao Tome and Principe               | 0.88   | 0.97   | 0.78   | 0.83   | 0.93   | 0.73   | -0.05 | -0.04 | -0.06 |
| Saudi Arabia                        | 1.82   | 3.64   | 0.4    | 2.49   | 5.07   | 0.5    | 0.34  | 0.37  | 0.24  |
| Senegal                             | 0.64   | 0.73   | 0.56   | 0.69   | 0.8    | 0.58   | 0.08  | 0.10  | 0.05  |
| Serbia                              | 0.47   | 0.3    | 0.65   | 0.59   | 0.33   | 0.87   | 0.24  | 0.08  | 0.33  |
| Seychelles                          | 0.88   | 0.95   | 0.8    | 0.99   | 1.09   | 0.9    | 0.13  | 0.14  | 0.12  |
| Sierra Leone                        | 0.68   | 0.75   | 0.61   | 0.7    | 0.79   | 0.6    | 0.04  | 0.07  | 0.00  |
| Singapore                           | 1.69   | 2.11   | 1.29   | 1.94   | 2.28   | 1.59   | 0.12  | 0.06  | 0.20  |
| Slovakia                            | 0.63   | 0.45   | 0.81   | 0.69   | 0.41   | 0.99   | 0.09  | -0.10 | 0.20  |
| Slovenia                            | 0.69   | 0.44   | 0.97   | 0.81   | 0.33   | 1.29   | 0.15  | -0.26 | 0.32  |
| Solomon Islands                     | 3.59   | 4.97   | 2.28   | 4.62   | 6.61   | 2.69   | 0.29  | 0.33  | 0.18  |
| Somalia                             | 0.7    | 0.76   | 0.64   | 0.64   | 0.7    | 0.59   | -0.08 | -0.09 | -0.08 |
| South Africa                        | 0.56   | 0.61   | 0.51   | 0.6    | 0.65   | 0.54   | 0.06  | 0.06  | 0.06  |
| South Korea                         | 1.42   | 1.79   | 1.06   | 1.56   | 1.93   | 1.18   | 0.06  | 0.05  | 0.07  |
| South Sudan                         | 0.65   | 0.72   | 0.58   | 0.67   | 0.73   | 0.6    | 0.03  | 0.02  | 0.04  |
| Spain                               | 8.48   | 15.06  | 1.63   | 11.48  | 20.69  | 2.04   | 0.34  | 0.36  | 0.24  |
| Sri Lanka                           | 0.73   | 0.78   | 0.68   | 0.96   | 0.96   | 0.97   | 0.33  | 0.23  | 0.45  |
| Sudan                               | 1.66   | 2.95   | 0.38   | 2.06   | 3.73   | 0.4    | 0.24  | 0.26  | 0.04  |
| Suriname                            | 1.43   | 2.63   | 0.28   | 2.12   | 3.91   | 0.33   | 0.47  | 0.48  | 0.20  |
| Swaziland                           | 0.37   | 0.38   | 0.35   | 0.48   | 0.49   | 0.47   | 0.30  | 0.28  | 0.32  |
| Sweden                              | 6.55   | 11.14  | 1.84   | 6.75   | 11.47  | 2.02   | 0.02  | 0.02  | 0.08  |
| Switzerland                         | 7.06   | 12.52  | 1.35   | 7.26   | 12.59  | 1.82   | 0.02  | 0.00  | 0.33  |
| Syria                               | 1.62   | 2.98   | 0.31   | 2.88   | 5.47   | 0.35   | 0.76  | 0.82  | 0.13  |
| Taiwan                              | 0.89   | 0.58   | 1.17   | 1.5    | 1.28   | 1.72   | 0.72  | 1.21  | 0.51  |
| Tajikistan                          | 0.47   | 0.48   | 0.46   | 0.47   | 0.44   | 0.5    | -0.01 | -0.10 | 0.08  |
| Tanzania                            | 0.56   | 0.62   | 0.5    | 0.59   | 0.64   | 0.53   | 0.06  | 0.05  | 0.07  |
| Thailand                            | 0.77   | 0.87   | 0.68   | 1.15   | 1.18   | 1.13   | 0.49  | 0.35  | 0.68  |
| The Bahamas                         | 1.68   | 2.93   | 0.42   | 2.92   | 5.27   | 0.48   | 0.72  | 0.78  | 0.13  |
| The Gambia                          | 0.68   | 0.76   | 0.59   | 0.65   | 0.73   | 0.57   | -0.04 | -0.05 | -0.04 |
| Timor-Leste                         | 0.56   | 0.65   | 0.47   | 0.58   | 0.63   | 0.53   | 0.04  | -0.03 | 0.14  |
| Togo                                | 0.64   | 0.73   | 0.56   | 0.63   | 0.71   | 0.55   | -0.01 | -0.02 | 0.00  |
| Tonga                               | 6.92   | 10.46  | 3.46   | 10.38  | 16.17  | 4.63   | 0.50  | 0.54  | 0.33  |
| Trinidad and Tobago                 | 1.79   | 3.16   | 0.41   | 2.93   | 5.31   | 0.47   | 0.62  | 0.66  | 0.14  |
| Tunisia                             | 2.85   | 5.15   | 0.57   | 5.45   | 10.08  | 0.71   | 0.89  | 0.93  | 0.22  |
| Turkey                              | 3.59   | 6.64   | 0.46   | 5.04   | 9.48   | 0.44   | 0.39  | 0.42  | -0.05 |
| Turkmenistan                        | 0.47   | 0.5    | 0.44   | 0.59   | 0.59   | 0.6    | 0.27  | 0.18  | 0.36  |
| Uganda                              | 0.48   | 0.54   | 0.42   | 0.49   | 0.54   | 0.45   | 0.04  | 0.00  | 0.08  |
| Ukraine                             | 0.88   | 0.98   | 0.76   | 1.18   | 1.28   | 1.06   | 0.33  | 0.30  | 0.38  |
| United Arab Emirates                | 1.38   | 2.88   | 0.6    | 1.37   | 3.23   | 0.7    | -0.02 | 0.11  | 0.15  |
| United Kingdom                      | 4.52   | 7.8    | 1.05   | 5.52   | 9.57   | 1.37   | 0.22  | 0.22  | 0.30  |
| United States                       | 3.16   | 3.27   | 3.05   | 3.32   | 3.26   | 3.39   | 0.04  | 0.00  | 0.10  |
| Uruguay                             | 11.63  | 21.53  | 1.13   | 14.84  | 27.34  | 1.45   | 0.27  | 0.26  | 0.27  |
| Uzbekistan                          | 0.45   | 0.49   | 0.41   | 0.59   | 0.6    | 0.58   | 0.30  | 0.21  | 0.40  |
| Vanuatu                             | 5.16   | 7.01   | 3.41   | 6.2    | 8.95   | 3.52   | 0.16  | 0.24  | -0.01 |
| Venezuela                           | -0.29  | 0.15   | -0.74  | 0.48   | 0.87   | 0.09   | -2.62 | 4.58  | -1.12 |
| Vietnam                             | 0.61   | 0.7    | 0.52   | 0.78   | 0.89   | 0.67   | 0.31  | 0.29  | 0.33  |
| Virgin Islands, U.S.                | 1.86   | 3.18   | 0.46   | 4.45   | 7.9    | 0.65   | 1.36  | 1.45  | 0.42  |
| Yemen                               | 1.63   | 2.87   | 0.38   | 1.84   | 3.32   | 0.4    | 0.13  | 0.16  | 0.05  |
| Zambia                              | 0.5    | 0.57   | 0.43   | 0.6    | 0.66   | 0.55   | 0.22  | 0.17  | 0.30  |
| Zimbabwe                            | 0.3    | 0.26   | 0.34   | 0.32   | 0.27   | 0.36   | 0.07  | 0.07  | 0.07  |
| <b>Hemorrhagic and other stroke</b> |        |        |        |        |        |        |       |       |       |
| Afghanistan                         | 197.61 | 228.18 | 168.5  | 208.76 | 242.28 | 177.29 | 0.06  | 0.06  | 0.06  |
| Albania                             | 214.25 | 234.30 | 195.16 | 348.01 | 368.74 | 326.95 | 0.61  | 0.56  | 0.67  |
| Algeria                             | 163.67 | 185.28 | 142.58 | 213.88 | 244.56 | 183.62 | 0.29  | 0.30  | 0.27  |
| American Samoa                      | 295.63 | 282.93 | 307.66 | 314.44 | 325.96 | 302.99 | 0.06  | 0.15  | -0.02 |
| Andorra                             | 148.34 | 151.54 | 144.96 | 182.5  | 182.46 | 182.54 | 0.22  | 0.20  | 0.24  |

|                                  |        |        |        |        |        |        |       |       |       |
|----------------------------------|--------|--------|--------|--------|--------|--------|-------|-------|-------|
| Angola                           | 162.62 | 187.89 | 136.72 | 162.75 | 189.51 | 135.64 | 0.01  | 0.02  | 0.00  |
| Antigua and Barbuda              | 248.81 | 263.55 | 233.04 | 241.72 | 256.76 | 225.32 | -0.03 | -0.03 | -0.04 |
| Argentina                        | 189.59 | 202.01 | 176.69 | 185.11 | 194.79 | 175.02 | -0.03 | -0.04 | -0.01 |
| Armenia                          | 307.97 | 342.11 | 271.8  | 416.01 | 448.98 | 378.05 | 0.33  | 0.29  | 0.37  |
| Australia                        | 152.97 | 167.14 | 138.72 | 155.17 | 167.02 | 143.3  | 0.01  | -0.01 | 0.03  |
| Austria                          | 229.35 | 243.77 | 213.63 | 245.58 | 246.36 | 244.76 | 0.06  | 0.01  | 0.13  |
| Azerbaijan                       | 280.38 | 316.58 | 242.60 | 329.54 | 362.35 | 296.34 | 0.17  | 0.14  | 0.21  |
| Bahrain                          | 171.16 | 188.69 | 158.26 | 197.56 | 232.8  | 175.97 | 0.15  | 0.23  | 0.10  |
| Bangladesh                       | 261.64 | 256.11 | 266.91 | 294.71 | 284.41 | 304.82 | 0.14  | 0.12  | 0.16  |
| Barbados                         | 249.04 | 265.96 | 230.81 | 299.01 | 314.88 | 281.75 | 0.19  | 0.18  | 0.21  |
| Belarus                          | 425.95 | 494.37 | 348.46 | 521.96 | 589.63 | 443.47 | 0.21  | 0.18  | 0.26  |
| Belgium                          | 175.24 | 188.66 | 161.2  | 199.23 | 208.47 | 189.64 | 0.13  | 0.10  | 0.16  |
| Belize                           | 155.72 | 164.12 | 147.46 | 171.05 | 182.25 | 159.78 | 0.10  | 0.11  | 0.09  |
| Benin                            | 207.41 | 209.11 | 205.6  | 225.75 | 223.17 | 228.34 | 0.10  | 0.07  | 0.12  |
| Bermuda                          | 212.01 | 223.41 | 200.47 | 240.14 | 254.56 | 225.45 | 0.13  | 0.13  | 0.12  |
| Bhutan                           | 190.66 | 182.46 | 198.28 | 206.88 | 190.8  | 220.73 | 0.07  | 0.03  | 0.10  |
| Bolivia                          | 124.41 | 137.01 | 111.89 | 149.42 | 164.58 | 134.32 | 0.18  | 0.18  | 0.18  |
| Bosnia and Herzegovina           | 294.87 | 346.64 | 243.04 | 418.55 | 469.34 | 367.29 | 0.40  | 0.34  | 0.49  |
| Botswana                         | 165.19 | 174.66 | 155.51 | 206.04 | 221.69 | 190.37 | 0.24  | 0.26  | 0.22  |
| Brazil                           | 134.25 | 137.38 | 131.06 | 135.11 | 136.03 | 134.15 | 0.00  | -0.02 | 0.01  |
| Brunei                           | 121.96 | 133.94 | 111.23 | 172.65 | 195.63 | 151.03 | 0.37  | 0.41  | 0.32  |
| Bulgaria                         | 458.74 | 488.32 | 428.32 | 538.22 | 585.57 | 488.52 | 0.17  | 0.19  | 0.13  |
| Burkina Faso                     | 196.52 | 201.23 | 191.58 | 175.76 | 180.89 | 170.56 | -0.10 | -0.10 | -0.10 |
| Burundi                          | 238.35 | 264.53 | 211.25 | 226.69 | 243.69 | 209.33 | -0.02 | -0.06 | 0.03  |
| Cambodia                         | 203.95 | 200.32 | 207.84 | 253.30 | 258.82 | 247.49 | 0.27  | 0.31  | 0.23  |
| Cameroon                         | 199.43 | 200.12 | 198.73 | 193.17 | 191.44 | 194.9  | -0.01 | -0.03 | 0.00  |
| Canada                           | 102.86 | 113.36 | 92.17  | 126.59 | 133.53 | 119.55 | 0.22  | 0.17  | 0.27  |
| Cape Verde                       | 269.94 | 275.81 | 263.45 | 303.01 | 313.02 | 292.72 | 0.12  | 0.13  | 0.11  |
| Central African Republic         | 226.77 | 253.34 | 199.30 | 214.02 | 242.00 | 185.28 | -0.05 | -0.04 | -0.07 |
| Chad                             | 179.2  | 179.74 | 178.66 | 171.49 | 169.05 | 173.92 | -0.04 | -0.06 | -0.02 |
| Chile                            | 169.81 | 187.24 | 151.91 | 212.82 | 231.95 | 193.18 | 0.23  | 0.22  | 0.25  |
| China                            | 279.18 | 266.70 | 291.02 | 344.59 | 286.88 | 398.95 | 0.26  | 0.09  | 0.41  |
| Colombia                         | 72.11  | 77.87  | 66.27  | 91.44  | 97.13  | 85.58  | 0.26  | 0.24  | 0.28  |
| Comoros                          | 211.02 | 230.95 | 191.21 | 221.37 | 240.72 | 202.37 | 0.05  | 0.04  | 0.06  |
| Congo                            | 236.14 | 276.04 | 196.04 | 219.05 | 263.83 | 174.33 | -0.07 | -0.04 | -0.11 |
| Costa Rica                       | 59.68  | 62.98  | 56.44  | 81.49  | 84.89  | 78.1   | 0.35  | 0.33  | 0.37  |
| Cote d'Ivoire                    | 238.19 | 216.53 | 258.15 | 239.27 | 223.75 | 254.25 | 0.01  | 0.04  | 0.00  |
| Croatia                          | 419.57 | 483.40 | 351.75 | 506.11 | 560.09 | 448.18 | 0.20  | 0.15  | 0.26  |
| Cuba                             | 273.29 | 291.91 | 254.95 | 330.89 | 347.21 | 314.73 | 0.20  | 0.18  | 0.22  |
| Cyprus                           | 115.34 | 114.56 | 116.14 | 169.36 | 160.26 | 179.08 | 0.44  | 0.37  | 0.51  |
| Czech Republic                   | 349.23 | 396.43 | 299.20 | 322.79 | 363.82 | 280.45 | -0.08 | -0.09 | -0.07 |
| Democratic Republic of the Congo | 157.06 | 185.60 | 127.82 | 147.76 | 169.55 | 125.87 | -0.06 | -0.08 | -0.01 |
| Denmark                          | 200.2  | 206.89 | 193.31 | 208.97 | 209.1  | 208.84 | 0.04  | 0.01  | 0.07  |
| Djibouti                         | 188.81 | 203.84 | 173.95 | 265.53 | 287.87 | 243.39 | 0.40  | 0.41  | 0.39  |
| Dominica                         | 237.4  | 255.27 | 219.4  | 269.27 | 290.3  | 247.91 | 0.14  | 0.14  | 0.14  |
| Dominican Republic               | 175.07 | 183.2  | 167.05 | 210.38 | 218.73 | 201.96 | 0.20  | 0.19  | 0.21  |
| Ecuador                          | 123.39 | 132.82 | 114.08 | 140.6  | 150.92 | 130.28 | 0.14  | 0.14  | 0.15  |
| Egypt                            | 173.44 | 185.90 | 161.06 | 206.47 | 218.79 | 194.40 | 0.19  | 0.17  | 0.21  |
| El Salvador                      | 57.39  | 60.65  | 53.98  | 67.91  | 72.48  | 62.73  | 0.19  | 0.19  | 0.17  |
| Equatorial Guinea                | 207.41 | 240.13 | 176.11 | 216.56 | 239.08 | 195.15 | 0.05  | 0.00  | 0.11  |
| Eritrea                          | 172.81 | 192.03 | 153.35 | 197.84 | 223.38 | 172.39 | 0.15  | 0.17  | 0.13  |
| Estonia                          | 399.44 | 460.41 | 330.05 | 420.76 | 488.01 | 341.79 | 0.04  | 0.05  | 0.02  |
| Ethiopia                         | 202.17 | 218.91 | 185.32 | 264.02 | 292.64 | 235.3  | 0.32  | 0.35  | 0.28  |
| Federated States of Micronesia   | 285.27 | 287.33 | 283.29 | 309.52 | 315.54 | 303.79 | 0.08  | 0.09  | 0.07  |
| Fiji                             | 315.57 | 321.90 | 309.44 | 367.09 | 383.87 | 350.87 | 0.15  | 0.19  | 0.12  |
| Finland                          | 193.9  | 208.75 | 178.15 | 233.64 | 237.53 | 229.62 | 0.19  | 0.13  | 0.27  |
| France                           | 151.28 | 157.18 | 145.05 | 184.7  | 187.79 | 181.41 | 0.21  | 0.19  | 0.24  |
| Gabon                            | 262.80 | 302.99 | 220.94 | 224.24 | 263.82 | 185.55 | -0.15 | -0.13 | -0.16 |
| Georgia                          | 490.07 | 528.53 | 447.64 | 565.82 | 583.08 | 546.95 | 0.15  | 0.10  | 0.21  |
| Germany                          | 176.5  | 190.73 | 161.21 | 215.02 | 210.59 | 219.6  | 0.21  | 0.10  | 0.34  |
| Ghana                            | 207.81 | 225.49 | 190.7  | 225.6  | 237.85 | 213.23 | 0.10  | 0.06  | 0.14  |

|                          |        |        |        |        |        |        |       |       |       |
|--------------------------|--------|--------|--------|--------|--------|--------|-------|-------|-------|
| Greece                   | 180.33 | 182.11 | 178.51 | 225.05 | 223.65 | 226.53 | 0.24  | 0.22  | 0.26  |
| Greenland                | 114.18 | 122.70 | 106.81 | 157.97 | 155.73 | 159.9  | 0.36  | 0.26  | 0.46  |
| Grenada                  | 252.11 | 277.23 | 226.34 | 261.17 | 281.56 | 240.90 | 0.05  | 0.03  | 0.09  |
| Guam                     | 316.91 | 325.11 | 309.74 | 448.75 | 457.99 | 439.77 | 0.43  | 0.41  | 0.44  |
| Guatemala                | 53.9   | 56.53  | 51.23  | 58.87  | 62.99  | 54.57  | 0.12  | 0.13  | 0.09  |
| Guinea                   | 205.56 | 212.58 | 198.38 | 213.44 | 213.03 | 213.86 | 0.04  | 0.00  | 0.08  |
| Guinea-Bissau            | 223.83 | 228.78 | 218.76 | 223.23 | 226.92 | 219.50 | 0.01  | 0.00  | 0.02  |
| Guyana                   | 217.67 | 229.80 | 205.15 | 288.02 | 306.84 | 269.38 | 0.33  | 0.34  | 0.32  |
| Haiti                    | 171.02 | 183.45 | 158.22 | 202.19 | 219.80 | 184.18 | 0.21  | 0.22  | 0.21  |
| Honduras                 | 72.35  | 77.38  | 67.35  | 78.74  | 78.36  | 79.12  | 0.09  | 0.01  | 0.18  |
| Hungary                  | 443.50 | 486.20 | 397.32 | 439.04 | 497.43 | 374.68 | -0.02 | 0.02  | -0.06 |
| Iceland                  | 110.73 | 111.82 | 109.66 | 129.8  | 126.65 | 133.03 | 0.16  | 0.12  | 0.19  |
| India                    | 200.71 | 190.00 | 210.68 | 225.6  | 199.86 | 249.51 | 0.12  | 0.05  | 0.19  |
| Indonesia                | 283.02 | 266.12 | 299.77 | 339.54 | 324.21 | 354.65 | 0.22  | 0.23  | 0.20  |
| Iran                     | 146.81 | 154.41 | 139.49 | 188.88 | 204.93 | 173.07 | 0.27  | 0.30  | 0.22  |
| Iraq                     | 182.73 | 200.5  | 165.28 | 190.09 | 213.1  | 167.65 | 0.04  | 0.06  | 0.01  |
| Ireland                  | 143.44 | 149.63 | 137.2  | 153.42 | 151.87 | 155.02 | 0.06  | 0.01  | 0.12  |
| Israel                   | 107.37 | 107.35 | 107.39 | 115.39 | 113.37 | 117.45 | 0.07  | 0.05  | 0.08  |
| Italy                    | 173.72 | 182.85 | 164.03 | 192.15 | 192.81 | 191.44 | 0.10  | 0.05  | 0.15  |
| Jamaica                  | 225.06 | 240.60 | 209.12 | 236.9  | 248.9  | 224.81 | 0.04  | 0.02  | 0.06  |
| Japan                    | 275.79 | 278.61 | 272.87 | 314.12 | 291.51 | 337.92 | 0.12  | 0.03  | 0.20  |
| Jordan                   | 145.92 | 165.66 | 128.06 | 147.82 | 168.68 | 127.96 | 0.00  | 0.01  | -0.01 |
| Kazakhstan               | 357.77 | 405.13 | 307.44 | 416.95 | 451.69 | 379.72 | 0.17  | 0.11  | 0.24  |
| Kenya                    | 136.28 | 142.71 | 129.81 | 142.96 | 145.16 | 140.75 | 0.05  | 0.02  | 0.09  |
| Kiribati                 | 324.67 | 320.00 | 329.44 | 365.70 | 349.92 | 381.89 | 0.13  | 0.10  | 0.17  |
| Kuwait                   | 148.47 | 152.7  | 144.77 | 175.59 | 190.35 | 164.07 | 0.17  | 0.23  | 0.12  |
| Kyrgyzstan               | 329.57 | 366.67 | 290.87 | 329.95 | 347.28 | 312.25 | 0.00  | -0.05 | 0.07  |
| Laos                     | 221.84 | 217.25 | 226.44 | 252.08 | 249.39 | 254.81 | 0.15  | 0.16  | 0.15  |
| Latvia                   | 414.83 | 488.11 | 330.42 | 442.11 | 522.07 | 348.98 | 0.05  | 0.06  | 0.04  |
| Lebanon                  | 194.27 | 233.05 | 154.43 | 216.22 | 254.95 | 177.89 | 0.10  | 0.08  | 0.14  |
| Lesotho                  | 175.55 | 183.46 | 167.17 | 197.95 | 216.32 | 179.21 | 0.12  | 0.18  | 0.07  |
| Liberia                  | 188.44 | 187.37 | 189.52 | 213.47 | 215.44 | 211.53 | 0.14  | 0.15  | 0.12  |
| Libya                    | 139.51 | 153.68 | 126.82 | 207.06 | 234.5  | 179.95 | 0.47  | 0.51  | 0.41  |
| Lithuania                | 364.29 | 439.02 | 281.13 | 494.44 | 590.44 | 382.8  | 0.34  | 0.33  | 0.34  |
| Luxembourg               | 182.76 | 196.04 | 168.95 | 194.9  | 201.85 | 187.93 | 0.07  | 0.03  | 0.11  |
| Macedonia                | 325.34 | 366.14 | 285.01 | 430.29 | 476.61 | 383.56 | 0.31  | 0.29  | 0.33  |
| Madagascar               | 242.73 | 254.22 | 231.20 | 275.25 | 295.05 | 255.33 | 0.15  | 0.17  | 0.12  |
| Malawi                   | 174.87 | 196.3  | 152.69 | 209.96 | 233.8  | 186.02 | 0.22  | 0.21  | 0.24  |
| Malaysia                 | 197.35 | 189.9  | 204.57 | 242.18 | 232.21 | 252.34 | 0.22  | 0.22  | 0.23  |
| Maldives                 | 150.85 | 126.73 | 173.75 | 164.92 | 154.78 | 174.99 | 0.09  | 0.22  | 0.01  |
| Mali                     | 211.72 | 230.00 | 193.04 | 180.13 | 189.1  | 171.33 | -0.14 | -0.17 | -0.10 |
| Malta                    | 134.56 | 136.07 | 133    | 215.05 | 205.56 | 224.61 | 0.57  | 0.49  | 0.65  |
| Marshall Islands         | 252.86 | 243.69 | 261.63 | 304.15 | 296.55 | 311.49 | 0.20  | 0.21  | 0.19  |
| Mauritania               | 222.24 | 224.84 | 219.63 | 216.66 | 223.32 | 210.09 | -0.02 | 0.00  | -0.04 |
| Mauritius                | 295.48 | 283.74 | 307.26 | 371.72 | 356.16 | 387.66 | 0.24  | 0.25  | 0.24  |
| Mexico                   | 55.77  | 60.67  | 50.81  | 55.95  | 55.66  | 56.24  | 0.00  | -0.09 | 0.10  |
| Moldova                  | 352.75 | 399.76 | 301.17 | 391.70 | 435.78 | 344.04 | 0.09  | 0.07  | 0.13  |
| Mongolia                 | 285.00 | 305.91 | 263.59 | 445.79 | 471.45 | 419.61 | 0.55  | 0.53  | 0.58  |
| Montenegro               | 293.07 | 342.67 | 243.05 | 434.82 | 496.57 | 371.60 | 0.47  | 0.44  | 0.51  |
| Morocco                  | 153.16 | 175.37 | 130.88 | 196.42 | 227.23 | 164.9  | 0.27  | 0.28  | 0.25  |
| Mozambique               | 213.43 | 228.98 | 196.47 | 272.09 | 296.82 | 246.22 | 0.28  | 0.30  | 0.26  |
| Myanmar                  | 280.59 | 258.50 | 303.58 | 348.15 | 328.34 | 368.86 | 0.27  | 0.29  | 0.25  |
| Namibia                  | 185.7  | 194.87 | 176.14 | 216.86 | 234.3  | 198.48 | 0.17  | 0.20  | 0.13  |
| Nepal                    | 197.81 | 192.84 | 202.85 | 235.04 | 222.01 | 248.89 | 0.20  | 0.16  | 0.24  |
| Netherlands              | 151.2  | 162.09 | 140.07 | 181.97 | 183.93 | 179.98 | 0.19  | 0.13  | 0.27  |
| New Zealand              | 162.01 | 177.98 | 145.56 | 190.98 | 204.79 | 176.64 | 0.16  | 0.13  | 0.19  |
| Nicaragua                | 58.96  | 63.04  | 54.81  | 75.3   | 80.99  | 69.44  | 0.29  | 0.29  | 0.28  |
| Niger                    | 172.59 | 174.68 | 170.42 | 178.88 | 173.64 | 184.05 | 0.05  | 0.00  | 0.10  |
| Nigeria                  | 182.02 | 185.57 | 178.54 | 167.11 | 166.58 | 167.62 | -0.08 | -0.10 | -0.06 |
| North Korea              | 271.54 | 296.39 | 245.23 | 364.60 | 375.37 | 353.34 | 0.35  | 0.27  | 0.45  |
| Northern Mariana Islands | 293.68 | 271.22 | 313.86 | 294.22 | 264.86 | 323.78 | 0.02  | -0.01 | 0.06  |

|                                  |        |        |        |        |        |        |       |       |       |
|----------------------------------|--------|--------|--------|--------|--------|--------|-------|-------|-------|
| Norway                           | 170.22 | 175.21 | 165.12 | 164.8  | 166.68 | 162.94 | -0.04 | -0.05 | -0.03 |
| Oman                             | 120.18 | 136.75 | 106.96 | 147.54 | 172.4  | 134.93 | 0.22  | 0.25  | 0.25  |
| Pakistan                         | 230.04 | 212.33 | 246.48 | 248.04 | 230.5  | 264.64 | 0.08  | 0.09  | 0.08  |
| Palestine                        | 134.84 | 152.48 | 117.64 | 158.42 | 178.89 | 138.51 | 0.16  | 0.16  | 0.16  |
| Panama                           | 76.68  | 77.41  | 75.96  | 99.08  | 100.14 | 98.04  | 0.32  | 0.31  | 0.32  |
| Papua New Guinea                 | 269.01 | 278.97 | 259.49 | 339.97 | 366.74 | 314.24 | 0.27  | 0.32  | 0.21  |
| Paraguay                         | 122.07 | 125.61 | 118.61 | 179.07 | 178.46 | 179.66 | 0.45  | 0.41  | 0.50  |
| Peru                             | 117.95 | 128.5  | 107.40 | 138.4  | 151.45 | 125.33 | 0.17  | 0.18  | 0.17  |
| Philippines                      | 185.79 | 173.92 | 197.41 | 252.22 | 243.55 | 260.73 | 0.37  | 0.41  | 0.33  |
| Poland                           | 310.01 | 351.79 | 266.07 | 361.92 | 412.41 | 307.59 | 0.16  | 0.16  | 0.14  |
| Portugal                         | 215.65 | 217.34 | 213.84 | 249.68 | 246.23 | 253.35 | 0.14  | 0.12  | 0.16  |
| Puerto Rico                      | 209.38 | 220.08 | 198.01 | 256.45 | 274.11 | 237.36 | 0.22  | 0.23  | 0.19  |
| Qatar                            | 140.99 | 147.81 | 137.62 | 141.93 | 165.15 | 133.24 | -0.01 | 0.10  | -0.04 |
| Romania                          | 412.59 | 462.47 | 361.27 | 495.22 | 550.59 | 436.28 | 0.19  | 0.18  | 0.20  |
| Russia                           | 422.94 | 495.96 | 340.01 | 531.85 | 593.53 | 459.40 | 0.25  | 0.19  | 0.34  |
| Rwanda                           | 201.71 | 220.08 | 182.68 | 219.71 | 249.17 | 187.67 | 0.09  | 0.14  | 0.03  |
| Saint Lucia                      | 242.95 | 258.43 | 227.00 | 263.39 | 280.61 | 245.51 | 0.10  | 0.09  | 0.10  |
| Saint Vincent and the Grenadines | 228.32 | 252.83 | 203.57 | 253.61 | 271.15 | 236.40 | 0.12  | 0.07  | 0.17  |
| Samoa                            | 328.01 | 337.41 | 319.36 | 353.89 | 365.55 | 342.94 | 0.07  | 0.08  | 0.07  |
| Sao Tome and Principe            | 210.73 | 215.43 | 205.94 | 216.98 | 223.24 | 210.67 | 0.03  | 0.04  | 0.02  |
| Saudi Arabia                     | 117.84 | 125.2  | 112.06 | 143.1  | 140.25 | 145.28 | 0.19  | 0.10  | 0.27  |
| Senegal                          | 192.48 | 191.9  | 193.07 | 187.52 | 193.37 | 181.46 | -0.02 | 0.01  | -0.05 |
| Serbia                           | 371.04 | 422.49 | 318.21 | 460.18 | 516.35 | 401.26 | 0.23  | 0.21  | 0.25  |
| Seychelles                       | 254.31 | 237.45 | 271.25 | 274.56 | 260.85 | 287.9  | 0.07  | 0.09  | 0.05  |
| Sierra Leone                     | 220.8  | 211.57 | 230.21 | 236.3  | 238.15 | 234.42 | 0.09  | 0.14  | 0.04  |
| Singapore                        | 173.93 | 196.43 | 152.02 | 231.67 | 259.45 | 202.91 | 0.30  | 0.30  | 0.30  |
| Slovakia                         | 307.31 | 345.42 | 267.41 | 349.09 | 387.69 | 308.35 | 0.12  | 0.11  | 0.14  |
| Slovenia                         | 305.56 | 350.2  | 258.23 | 353.5  | 394.88 | 311.38 | 0.14  | 0.12  | 0.19  |
| Solomon Islands                  | 300.87 | 308.02 | 294.09 | 330.55 | 341.30 | 320.13 | 0.10  | 0.11  | 0.09  |
| Somalia                          | 202.12 | 223.19 | 180.66 | 212.18 | 233.90 | 190.25 | 0.05  | 0.05  | 0.05  |
| South Africa                     | 248.33 | 242.51 | 254.29 | 277.64 | 272.99 | 282.47 | 0.11  | 0.12  | 0.11  |
| South Korea                      | 241.89 | 272.76 | 211.15 | 346.92 | 382.21 | 311.2  | 0.39  | 0.36  | 0.42  |
| South Sudan                      | 208.91 | 230.91 | 186.71 | 240.46 | 266.26 | 214.73 | 0.15  | 0.15  | 0.15  |
| Spain                            | 166.76 | 175.5  | 157.64 | 198.61 | 208.64 | 188.31 | 0.18  | 0.18  | 0.18  |
| Sri Lanka                        | 192.08 | 181.72 | 202.24 | 308.76 | 304.29 | 313.56 | 0.63  | 0.69  | 0.58  |
| Sudan                            | 172.75 | 193.49 | 152.18 | 194.62 | 223.21 | 166.25 | 0.13  | 0.16  | 0.10  |
| Suriname                         | 220.91 | 233.97 | 208.26 | 268.76 | 281.94 | 255.64 | 0.21  | 0.20  | 0.23  |
| Swaziland                        | 146.61 | 151.95 | 140.65 | 180.48 | 196.33 | 164.3  | 0.23  | 0.29  | 0.16  |
| Sweden                           | 205.3  | 195.34 | 215.49 | 179.13 | 164.56 | 193.73 | -0.14 | -0.16 | -0.12 |
| Switzerland                      | 155.79 | 161.86 | 149.44 | 168.47 | 173.4  | 163.42 | 0.07  | 0.07  | 0.08  |
| Syria                            | 160.12 | 169.26 | 151.26 | 202.3  | 215.42 | 189.5  | 0.26  | 0.27  | 0.24  |
| Taiwan                           | 261.38 | 250.48 | 271.49 | 305.72 | 299.37 | 312.09 | 0.19  | 0.21  | 0.19  |
| Tajikistan                       | 237.58 | 269.03 | 205.76 | 214.92 | 235.18 | 195.13 | -0.10 | -0.13 | -0.05 |
| Tanzania                         | 179.75 | 197.84 | 161.33 | 202.88 | 220.93 | 184.6  | 0.15  | 0.13  | 0.17  |
| Thailand                         | 228.00 | 208.98 | 247.37 | 331.70 | 307.75 | 356.33 | 0.45  | 0.47  | 0.44  |
| The Bahamas                      | 216.23 | 230.73 | 201.53 | 261.65 | 279.9  | 242.62 | 0.20  | 0.20  | 0.19  |
| The Gambia                       | 189.51 | 180.89 | 198.02 | 193.94 | 185.3  | 202.75 | 0.03  | 0.03  | 0.03  |
| Timor-Leste                      | 174.71 | 171.15 | 178.18 | 215.7  | 216.7  | 214.73 | 0.25  | 0.28  | 0.22  |
| Togo                             | 190.5  | 190.9  | 190.1  | 193    | 189.35 | 196.72 | 0.02  | 0.00  | 0.05  |
| Tonga                            | 279.09 | 305.84 | 252.98 | 302.29 | 323    | 281.7  | 0.08  | 0.05  | 0.11  |
| Trinidad and Tobago              | 218.8  | 228.54 | 208.99 | 271.34 | 279.27 | 263.20 | 0.23  | 0.21  | 0.25  |
| Tunisia                          | 184.15 | 193.95 | 174.46 | 242.3  | 260.14 | 224.05 | 0.30  | 0.32  | 0.27  |
| Turkey                           | 162.64 | 184.94 | 139.79 | 186.7  | 213.13 | 159.34 | 0.14  | 0.14  | 0.13  |
| Turkmenistan                     | 262.76 | 292.29 | 232.40 | 331.90 | 350.43 | 312.73 | 0.25  | 0.19  | 0.34  |
| Uganda                           | 182.44 | 201.62 | 163.01 | 177.65 | 192.55 | 162.73 | -0.01 | -0.03 | 0.02  |
| Ukraine                          | 463.30 | 534.69 | 380.22 | 525.38 | 591.03 | 447.84 | 0.13  | 0.10  | 0.17  |
| United Arab Emirates             | 170.41 | 178.64 | 166.13 | 185.76 | 203.7  | 179.22 | 0.08  | 0.13  | 0.06  |
| United Kingdom                   | 301.77 | 334.19 | 267.47 | 304.22 | 330.92 | 276.84 | 0.00  | -0.01 | 0.03  |
| United States                    | 118.64 | 125.91 | 110.99 | 110.43 | 112.24 | 108.55 | -0.08 | -0.11 | -0.04 |
| Uruguay                          | 237.15 | 253.29 | 220.03 | 231.94 | 251.8  | 210.66 | -0.03 | -0.01 | -0.05 |
| Uzbekistan                       | 220.46 | 244.16 | 196.23 | 253.03 | 268.92 | 236.63 | 0.14  | 0.09  | 0.20  |



|                                   |        |        |        |        |        |        |       |       |       |
|-----------------------------------|--------|--------|--------|--------|--------|--------|-------|-------|-------|
| Vanuatu                           | 364.83 | 361.90 | 367.59 | 412.76 | 423.97 | 401.83 | 0.09  | 0.14  | 0.05  |
| Venezuela                         | 79.74  | 84.24  | 75.31  | 104.46 | 108.64 | 100.25 | 0.29  | 0.28  | 0.31  |
| Vietnam                           | 274.66 | 251.02 | 299.02 | 312.58 | 291.74 | 333.87 | 0.17  | 0.18  | 0.15  |
| Virgin Islands, U.S.              | 203.31 | 214.38 | 191.58 | 304.07 | 313.37 | 293.84 | 0.48  | 0.45  | 0.51  |
| Yemen                             | 157.75 | 182.06 | 133.00 | 185.93 | 217.25 | 155.25 | 0.18  | 0.19  | 0.17  |
| Zambia                            | 184.04 | 205.57 | 162.15 | 227.56 | 245.66 | 209.41 | 0.25  | 0.21  | 0.31  |
| Zimbabwe                          | 156.85 | 161.32 | 152.34 | 136.04 | 146.4  | 125.38 | -0.13 | -0.09 | -0.17 |
| <b>Hypertensive heart disease</b> |        |        |        |        |        |        |       |       |       |
| Afghanistan                       | 9.48   | 12.69  | 6.42   | 11.61  | 15.7   | 7.78   | 0.23  | 0.24  | 0.22  |
| Albania                           | 27.64  | 32.34  | 23.17  | 66.86  | 76.83  | 56.73  | 1.40  | 1.36  | 1.44  |
| Algeria                           | 30.45  | 41.63  | 19.55  | 54.21  | 71.73  | 36.93  | 0.75  | 0.70  | 0.86  |
| American Samoa                    | 30.57  | 32.31  | 28.93  | 28.43  | 33.02  | 23.86  | -0.07 | 0.02  | -0.18 |
| Andorra                           | 55.63  | 67.86  | 42.74  | 68.14  | 80.55  | 55.21  | 0.21  | 0.18  | 0.27  |
| Angola                            | 49.49  | 45.81  | 53.26  | 48.24  | 44.41  | 52.11  | -0.02 | -0.02 | -0.01 |
| Antigua and Barbuda               | 128.61 | 143.1  | 113.11 | 144.36 | 156.58 | 131.03 | 0.12  | 0.09  | 0.16  |
| Argentina                         | 82.48  | 102.24 | 61.94  | 89.61  | 115.14 | 62.98  | 0.08  | 0.12  | 0.02  |
| Armenia                           | 27.69  | 33.3   | 21.74  | 58.17  | 69.22  | 45.44  | 1.07  | 1.05  | 1.06  |
| Australia                         | 45.24  | 49.28  | 41.17  | 60.78  | 62.2   | 59.35  | 0.33  | 0.25  | 0.43  |
| Austria                           | 62.28  | 81.39  | 41.46  | 69.58  | 85.22  | 53.16  | 0.11  | 0.04  | 0.26  |
| Azerbaijan                        | 18.38  | 23.26  | 13.29  | 32.29  | 37.86  | 26.66  | 0.74  | 0.61  | 0.99  |
| Bahrain                           | 13.78  | 19.14  | 9.84   | 17.15  | 26.92  | 11.17  | 0.24  | 0.40  | 0.13  |
| Bangladesh                        | 35.72  | 33.41  | 37.93  | 66.85  | 62.59  | 71.04  | 0.89  | 0.88  | 0.90  |
| Barbados                          | 142.31 | 165.94 | 116.84 | 214.78 | 236.02 | 191.7  | 0.50  | 0.41  | 0.62  |
| Belarus                           | 32.49  | 42.72  | 20.91  | 46.53  | 62.29  | 28.26  | 0.42  | 0.45  | 0.34  |
| Belgium                           | 37.07  | 48.61  | 25     | 41.73  | 53.16  | 29.84  | 0.12  | 0.09  | 0.18  |
| Belize                            | 61.18  | 60.96  | 61.39  | 65.22  | 63.48  | 66.98  | 0.07  | 0.04  | 0.10  |
| Benin                             | 55.85  | 52.96  | 58.92  | 53.51  | 49.29  | 57.75  | -0.03 | -0.06 | -0.01 |
| Bermuda                           | 82.29  | 87.83  | 76.67  | 118.91 | 130.37 | 107.23 | 0.44  | 0.47  | 0.39  |
| Bhutan                            | 37.62  | 35.55  | 39.53  | 64.62  | 60.1   | 68.51  | 0.70  | 0.67  | 0.71  |
| Bolivia                           | 9.94   | 12.1   | 7.8    | 20.33  | 24.01  | 16.66  | 1.01  | 0.95  | 1.10  |
| Bosnia and Herzegovina            | 34.85  | 43.39  | 26.3   | 80.1   | 100.25 | 59.77  | 1.27  | 1.29  | 1.24  |
| Botswana                          | 32.69  | 30.86  | 34.56  | 51.9   | 45.91  | 57.89  | 0.58  | 0.48  | 0.66  |
| Brazil                            | 75.98  | 87.54  | 64.25  | 124.09 | 140.09 | 107.54 | 0.62  | 0.59  | 0.66  |
| Brunei                            | 22.92  | 23.14  | 22.73  | 31.82  | 33.84  | 29.91  | 0.35  | 0.41  | 0.28  |
| Bulgaria                          | 97.08  | 111.78 | 81.96  | 151.25 | 189.44 | 111.18 | 0.55  | 0.68  | 0.35  |
| Burkina Faso                      | 51.68  | 46.98  | 56.6   | 45.02  | 43     | 47.07  | -0.12 | -0.08 | -0.16 |
| Burundi                           | 44.14  | 40.86  | 47.53  | 42.71  | 37.2   | 48.34  | 0.00  | -0.07 | 0.06  |
| Cambodia                          | 20.3   | 24.03  | 16.29  | 30.35  | 36.57  | 23.83  | 0.53  | 0.54  | 0.51  |
| Cameroon                          | 45.86  | 41.52  | 50.25  | 49.47  | 44.26  | 54.68  | 0.10  | 0.08  | 0.11  |
| Canada                            | 56.77  | 67.18  | 46.19  | 83.68  | 96.45  | 70.74  | 0.46  | 0.43  | 0.51  |
| Cape Verde                        | 83.14  | 80.28  | 86.3   | 113.45 | 115.35 | 111.5  | 0.36  | 0.43  | 0.29  |
| Central African Republic          | 72.11  | 67.55  | 76.83  | 70.27  | 67.66  | 72.94  | -0.02 | 0.00  | -0.05 |
| Chad                              | 57.67  | 50.79  | 64.66  | 51.05  | 44.34  | 57.75  | -0.11 | -0.13 | -0.10 |
| Chile                             | 47.21  | 58.02  | 36.12  | 83.6   | 104.25 | 62.39  | 0.74  | 0.77  | 0.70  |
| China                             | 56.66  | 60.93  | 52.61  | 125.47 | 132.2  | 119.13 | 1.26  | 1.20  | 1.33  |
| Colombia                          | 50.55  | 61.39  | 39.57  | 104.17 | 125.06 | 82.64  | 1.04  | 1.02  | 1.07  |
| Comoros                           | 53.47  | 49.34  | 57.57  | 54.56  | 49.31  | 59.72  | 0.02  | 0.00  | 0.04  |
| Congo                             | 66.06  | 58.21  | 73.94  | 69.73  | 62.53  | 76.92  | 0.06  | 0.08  | 0.04  |
| Costa Rica                        | 65.01  | 72.82  | 57.33  | 125.48 | 139.4  | 111.58 | 0.91  | 0.89  | 0.92  |
| Cote d'Ivoire                     | 50.36  | 38.26  | 61.51  | 55.05  | 39.46  | 70.1   | 0.10  | 0.04  | 0.15  |
| Croatia                           | 78.28  | 96.33  | 59.11  | 136.88 | 168.67 | 102.76 | 0.74  | 0.74  | 0.72  |
| Cuba                              | 116.93 | 116.98 | 116.88 | 202.19 | 207.7  | 196.73 | 0.71  | 0.76  | 0.67  |
| Cyprus                            | 40.63  | 43.52  | 37.67  | 42.46  | 47.03  | 37.57  | 0.02  | 0.06  | -0.03 |
| Czech Republic                    | 66.84  | 88.92  | 43.44  | 116.84 | 151.79 | 80.76  | 0.73  | 0.70  | 0.84  |
| Democratic Republic of the Congo  | 61.25  | 58.51  | 64.06  | 61.9   | 57.26  | 66.56  | 0.01  | -0.02 | 0.04  |
| Denmark                           | 41.55  | 50.78  | 32.05  | 41.55  | 48.3   | 34.68  | -0.01 | -0.05 | 0.07  |
| Djibouti                          | 51.2   | 48.51  | 53.87  | 76.04  | 69.45  | 82.57  | 0.48  | 0.43  | 0.53  |
| Dominica                          | 119.81 | 122.95 | 116.64 | 179.42 | 190.4  | 168.27 | 0.51  | 0.55  | 0.46  |
| Dominican Republic                | 63.7   | 59.79  | 67.56  | 101.42 | 101.48 | 101.36 | 0.59  | 0.69  | 0.50  |
| Ecuador                           | 38.39  | 43.59  | 33.25  | 68.47  | 77.51  | 59.43  | 0.79  | 0.78  | 0.79  |
| Egypt                             | 34.99  | 47.71  | 22.35  | 38.28  | 51.32  | 25.52  | 0.09  | 0.07  | 0.14  |

|                                |        |        |        |        |        |        |       |       |       |
|--------------------------------|--------|--------|--------|--------|--------|--------|-------|-------|-------|
| El Salvador                    | 42.8   | 52.37  | 32.77  | 81.88  | 97.58  | 64.13  | 0.92  | 0.86  | 0.98  |
| Equatorial Guinea              | 78.49  | 72.53  | 84.18  | 74.18  | 61.21  | 86.51  | -0.05 | -0.15 | 0.03  |
| Eritrea                        | 32.55  | 32.15  | 32.96  | 44.19  | 43.35  | 45.02  | 0.37  | 0.35  | 0.38  |
| Estonia                        | 48.58  | 66.01  | 28.76  | 81.18  | 109.63 | 47.77  | 0.65  | 0.65  | 0.64  |
| Ethiopia                       | 48.89  | 40.69  | 57.15  | 48.49  | 42.93  | 54.07  | 0.00  | 0.06  | -0.04 |
| Federated States of Micronesia | 21.68  | 24.71  | 18.77  | 29.02  | 34.61  | 23.7   | 0.33  | 0.39  | 0.25  |
| Fiji                           | 20.83  | 26.65  | 15.19  | 41.98  | 55.53  | 28.88  | 1.00  | 1.07  | 0.89  |
| Finland                        | 41.91  | 55.41  | 27.6   | 65.83  | 82.76  | 48.38  | 0.55  | 0.48  | 0.72  |
| France                         | 56.61  | 72.72  | 39.62  | 67.79  | 83.4   | 51.17  | 0.19  | 0.14  | 0.28  |
| Gabon                          | 120.34 | 113.28 | 127.68 | 111.67 | 106.98 | 116.25 | -0.07 | -0.06 | -0.09 |
| Georgia                        | 50.18  | 65.35  | 33.45  | 83.32  | 105.91 | 58.6   | 0.65  | 0.61  | 0.74  |
| Germany                        | 56.71  | 75.57  | 36.44  | 73.95  | 90.72  | 56.62  | 0.29  | 0.19  | 0.53  |
| Ghana                          | 39.3   | 33.39  | 45.01  | 56.33  | 50.98  | 61.73  | 0.45  | 0.54  | 0.40  |
| Greece                         | 51.13  | 58.8   | 43.27  | 69.75  | 82.86  | 55.98  | 0.35  | 0.40  | 0.28  |
| Greenland                      | 35.4   | 38.67  | 32.58  | 57.83  | 60.1   | 55.86  | 0.60  | 0.54  | 0.67  |
| Grenada                        | 100.22 | 113.8  | 86.28  | 109.16 | 125.25 | 93.17  | 0.11  | 0.11  | 0.10  |
| Guam                           | 43.12  | 52.06  | 35.31  | 82.95  | 96.41  | 69.87  | 0.94  | 0.86  | 1.01  |
| Guatemala                      | 29.62  | 35.71  | 23.43  | 45.36  | 56.2   | 34.04  | 0.56  | 0.60  | 0.49  |
| Guinea                         | 61.08  | 52.49  | 69.87  | 62.14  | 52.67  | 71.58  | 0.02  | 0.00  | 0.03  |
| Guinea-Bissau                  | 59.86  | 51.73  | 68.19  | 56.56  | 46.91  | 66.33  | -0.04 | -0.09 | -0.01 |
| Guyana                         | 67.7   | 68.25  | 67.14  | 85.55  | 90.7   | 80.46  | 0.27  | 0.33  | 0.21  |
| Haiti                          | 65.91  | 62.7   | 69.22  | 73.17  | 73.42  | 72.92  | 0.14  | 0.19  | 0.09  |
| Honduras                       | 44.08  | 46.97  | 41.21  | 58     | 62.06  | 53.95  | 0.32  | 0.32  | 0.32  |
| Hungary                        | 80.97  | 102.5  | 57.68  | 133.43 | 174.17 | 88.51  | 0.64  | 0.69  | 0.53  |
| Iceland                        | 31.67  | 34.67  | 28.69  | 37.74  | 40.78  | 34.64  | 0.18  | 0.17  | 0.19  |
| India                          | 42.15  | 44.59  | 39.89  | 69.88  | 75.74  | 64.43  | 0.66  | 0.70  | 0.62  |
| Indonesia                      | 31.14  | 35.88  | 26.43  | 46.79  | 54.77  | 38.93  | 0.52  | 0.54  | 0.50  |
| Iran                           | 31.54  | 41.07  | 22.36  | 41.47  | 53.6   | 29.52  | 0.29  | 0.28  | 0.30  |
| Iraq                           | 25.45  | 33.31  | 17.74  | 23.3   | 31.41  | 15.39  | -0.09 | -0.06 | -0.13 |
| Ireland                        | 27.1   | 32.58  | 21.58  | 29.2   | 34.25  | 24.01  | 0.07  | 0.04  | 0.10  |
| Israel                         | 25.1   | 27.6   | 22.59  | 34.52  | 41.15  | 27.77  | 0.37  | 0.48  | 0.22  |
| Italy                          | 78.84  | 94.23  | 62.5   | 93.2   | 113.76 | 71.34  | 0.17  | 0.20  | 0.13  |
| Jamaica                        | 149.24 | 150.78 | 147.66 | 193.99 | 191.66 | 196.34 | 0.29  | 0.26  | 0.31  |
| Japan                          | 108.33 | 140.8  | 74.7   | 209.58 | 275.04 | 140.64 | 0.89  | 0.93  | 0.83  |
| Jordan                         | 33.1   | 42.5   | 24.6   | 40.14  | 53.8   | 27.14  | 0.20  | 0.25  | 0.09  |
| Kazakhstan                     | 37.63  | 50.66  | 23.78  | 47.1   | 60.15  | 33.11  | 0.25  | 0.19  | 0.39  |
| Kenya                          | 59.9   | 54.87  | 64.97  | 65.6   | 62.62  | 68.59  | 0.10  | 0.15  | 0.06  |
| Kiribati                       | 18.49  | 22.18  | 14.73  | 20.42  | 25.25  | 15.47  | 0.11  | 0.14  | 0.06  |
| Kuwait                         | 25.08  | 30.35  | 20.47  | 32.76  | 43.79  | 24.15  | 0.29  | 0.42  | 0.16  |
| Kyrgyzstan                     | 26.92  | 33.34  | 20.22  | 26.62  | 30.64  | 22.51  | -0.01 | -0.08 | 0.11  |
| Laos                           | 23.91  | 27.84  | 19.98  | 26.17  | 30.42  | 21.89  | 0.11  | 0.11  | 0.12  |
| Latvia                         | 31.16  | 42.37  | 18.25  | 49     | 67.07  | 27.96  | 0.56  | 0.57  | 0.51  |
| Lebanon                        | 33.04  | 45.84  | 19.89  | 48.83  | 67.49  | 30.36  | 0.46  | 0.46  | 0.51  |
| Lesotho                        | 47.31  | 42.79  | 52.09  | 48.78  | 47.83  | 49.75  | 0.03  | 0.12  | -0.05 |
| Liberia                        | 50.82  | 39.89  | 61.82  | 53.88  | 44.39  | 63.22  | 0.06  | 0.12  | 0.03  |
| Libya                          | 24.69  | 33.23  | 17.04  | 30.41  | 41.67  | 19.27  | 0.22  | 0.24  | 0.13  |
| Lithuania                      | 35.47  | 46.5   | 23.2   | 62.71  | 84.4   | 37.48  | 0.75  | 0.80  | 0.59  |
| Luxembourg                     | 44.06  | 58.78  | 28.75  | 39.77  | 52.59  | 26.91  | -0.10 | -0.10 | -0.07 |
| Macedonia                      | 50.9   | 56.63  | 45.23  | 91.56  | 109.27 | 73.69  | 0.78  | 0.91  | 0.61  |
| Madagascar                     | 54.59  | 43.77  | 65.44  | 52.91  | 46.51  | 59.34  | -0.02 | 0.07  | -0.08 |
| Malawi                         | 42.01  | 37.85  | 46.32  | 48.85  | 45.08  | 52.64  | 0.18  | 0.21  | 0.16  |
| Malaysia                       | 24.38  | 26.87  | 21.96  | 39.17  | 41.57  | 36.73  | 0.60  | 0.54  | 0.67  |
| Maldives                       | 17.18  | 15.37  | 18.9   | 35.71  | 36.23  | 35.2   | 1.08  | 1.35  | 0.87  |
| Mali                           | 62.33  | 50.95  | 73.95  | 50.4   | 42.67  | 57.99  | -0.18 | -0.15 | -0.20 |
| Malta                          | 28.43  | 33.03  | 23.67  | 42.65  | 51.49  | 33.74  | 0.47  | 0.53  | 0.39  |
| Marshall Islands               | 17.43  | 20.75  | 14.25  | 24.25  | 29.33  | 19.35  | 0.39  | 0.41  | 0.35  |
| Mauritania                     | 55.35  | 47.36  | 63.39  | 66.52  | 57.6   | 75.33  | 0.21  | 0.22  | 0.20  |
| Mauritius                      | 39.33  | 49.4   | 29.22  | 89.6   | 106.53 | 72.25  | 1.25  | 1.14  | 1.43  |
| Mexico                         | 45.1   | 55.5   | 34.6   | 77.49  | 93.19  | 61.64  | 0.71  | 0.67  | 0.77  |
| Moldova                        | 26.35  | 32.44  | 19.67  | 38.99  | 48.54  | 28.66  | 0.46  | 0.48  | 0.44  |
| Mongolia                       | 18.27  | 16.69  | 19.88  | 20.45  | 20.16  | 20.74  | 0.11  | 0.20  | 0.04  |

|                                  |        |        |        |        |        |        |       |       |       |
|----------------------------------|--------|--------|--------|--------|--------|--------|-------|-------|-------|
| Montenegro                       | 48.46  | 63.09  | 33.7   | 62.23  | 75.59  | 48.55  | 0.27  | 0.19  | 0.42  |
| Morocco                          | 33.54  | 44.85  | 22.18  | 55.16  | 72.25  | 37.67  | 0.63  | 0.60  | 0.68  |
| Mozambique                       | 38.59  | 35.63  | 41.82  | 38.52  | 36.05  | 41.1   | 0.00  | 0.02  | -0.01 |
| Myanmar                          | 34.84  | 44.81  | 24.46  | 52.68  | 68.43  | 36.21  | 0.55  | 0.55  | 0.53  |
| Namibia                          | 42.94  | 38.35  | 47.73  | 45.05  | 41.02  | 49.3   | 0.05  | 0.07  | 0.04  |
| Nepal                            | 38.01  | 41.45  | 34.52  | 57.48  | 57.46  | 57.49  | 0.52  | 0.39  | 0.69  |
| Netherlands                      | 29.4   | 39.47  | 19.09  | 39.42  | 48.69  | 29.99  | 0.33  | 0.23  | 0.55  |
| New Zealand                      | 32.87  | 42.51  | 22.93  | 41.49  | 49.7   | 32.96  | 0.24  | 0.15  | 0.41  |
| Nicaragua                        | 42.65  | 52.12  | 33.04  | 82.11  | 96.88  | 66.92  | 0.94  | 0.87  | 1.05  |
| Niger                            | 42.55  | 35.17  | 50.18  | 48.53  | 38.78  | 58.12  | 0.15  | 0.11  | 0.18  |
| Nigeria                          | 62.27  | 54.07  | 70.3   | 70.05  | 59.45  | 80.26  | 0.13  | 0.10  | 0.14  |
| North Korea                      | 61.62  | 81.11  | 40.98  | 113.96 | 149.51 | 76.8   | 0.86  | 0.85  | 0.89  |
| Northern Mariana Islands         | 18.46  | 21.38  | 15.84  | 16.88  | 18.18  | 15.58  | -0.07 | -0.14 | 0.01  |
| Norway                           | 40.91  | 49.8   | 31.83  | 39.26  | 47.28  | 31.33  | -0.05 | -0.05 | -0.03 |
| Oman                             | 27.77  | 39.29  | 18.57  | 22.72  | 37     | 15.48  | -0.18 | -0.06 | -0.17 |
| Pakistan                         | 43.99  | 41.43  | 46.36  | 52.7   | 52.97  | 52.44  | 0.20  | 0.28  | 0.14  |
| Palestine                        | 13.42  | 17.46  | 9.49   | 16.97  | 22.17  | 11.91  | 0.25  | 0.26  | 0.24  |
| Panama                           | 53.55  | 60.51  | 46.74  | 91.74  | 104.45 | 79.1   | 0.74  | 0.75  | 0.73  |
| Papua New Guinea                 | 13.81  | 16.22  | 11.51  | 16.05  | 18.77  | 13.43  | 0.16  | 0.16  | 0.17  |
| Paraguay                         | 98.62  | 98.86  | 98.38  | 136.49 | 137.6  | 135.41 | 0.37  | 0.38  | 0.36  |
| Peru                             | 24.41  | 29.25  | 19.56  | 51.33  | 61.75  | 40.9   | 1.11  | 1.11  | 1.10  |
| Philippines                      | 36.19  | 42.52  | 29.99  | 49.67  | 59.63  | 39.89  | 0.38  | 0.41  | 0.34  |
| Poland                           | 59.45  | 78.46  | 39.46  | 109.76 | 146.46 | 70.27  | 0.83  | 0.85  | 0.76  |
| Portugal                         | 45.41  | 55.44  | 34.62  | 55.12  | 68.79  | 40.55  | 0.20  | 0.23  | 0.15  |
| Puerto Rico                      | 147.02 | 153.42 | 140.22 | 223.32 | 248.88 | 195.71 | 0.51  | 0.61  | 0.39  |
| Qatar                            | 13.42  | 18.82  | 10.76  | 14.63  | 24.05  | 11.11  | 0.08  | 0.26  | 0.02  |
| Romania                          | 70.64  | 87.66  | 53.13  | 131.87 | 169.96 | 91.33  | 0.85  | 0.93  | 0.71  |
| Russia                           | 30.3   | 44.19  | 14.53  | 43.27  | 60.28  | 23.29  | 0.42  | 0.36  | 0.59  |
| Rwanda                           | 39.44  | 36.78  | 42.18  | 52.43  | 51.28  | 53.68  | 0.34  | 0.40  | 0.28  |
| Saint Lucia                      | 111.78 | 115.61 | 107.83 | 158.45 | 165.49 | 151.15 | 0.44  | 0.44  | 0.43  |
| Saint Vincent and the Grenadines | 93.7   | 101.22 | 86.11  | 136.89 | 140.82 | 133.03 | 0.47  | 0.39  | 0.56  |
| Samoa                            | 26.23  | 30.62  | 22.18  | 41.35  | 49.31  | 33.87  | 0.57  | 0.60  | 0.52  |
| Sao Tome and Principe            | 82.16  | 71.1   | 93.43  | 70.94  | 63.65  | 78.28  | -0.14 | -0.10 | -0.16 |
| Saudi Arabia                     | 11.51  | 19.14  | 5.5    | 16.52  | 27.52  | 8.07   | 0.41  | 0.41  | 0.44  |
| Senegal                          | 58.19  | 47.31  | 69.17  | 62.45  | 52.98  | 72.27  | 0.08  | 0.12  | 0.06  |
| Serbia                           | 49.05  | 57.55  | 40.33  | 83.13  | 99.95  | 65.49  | 0.68  | 0.72  | 0.61  |
| Seychelles                       | 85.16  | 110.95 | 59.25  | 114.74 | 148.86 | 81.53  | 0.34  | 0.34  | 0.37  |
| Sierra Leone                     | 50.88  | 38.57  | 63.45  | 46.89  | 37.21  | 56.77  | -0.06 | -0.02 | -0.08 |
| Singapore                        | 54.38  | 63.09  | 45.89  | 114.36 | 131.71 | 96.4   | 1.06  | 1.05  | 1.05  |
| Slovakia                         | 53.16  | 67.78  | 37.86  | 85.34  | 112.87 | 56.3   | 0.59  | 0.65  | 0.47  |
| Slovenia                         | 78.66  | 102.5  | 53.38  | 156.14 | 198.62 | 112.89 | 0.96  | 0.92  | 1.08  |
| Solomon Islands                  | 16.3   | 16.18  | 16.42  | 20.25  | 21.69  | 18.86  | 0.24  | 0.34  | 0.15  |
| Somalia                          | 49.97  | 43.59  | 56.45  | 44.5   | 39.11  | 49.93  | -0.11 | -0.10 | -0.11 |
| South Africa                     | 65.74  | 64.3   | 67.22  | 79.44  | 81.63  | 77.17  | 0.20  | 0.26  | 0.14  |
| South Korea                      | 60.94  | 77.63  | 44.33  | 117.57 | 147.64 | 87.14  | 0.87  | 0.85  | 0.90  |
| South Sudan                      | 47.79  | 41.23  | 54.42  | 56.2   | 48.89  | 63.49  | 0.18  | 0.19  | 0.17  |
| Spain                            | 49.15  | 63.03  | 34.68  | 59.46  | 76.25  | 42.23  | 0.20  | 0.20  | 0.20  |
| Sri Lanka                        | 46.77  | 52.51  | 41.14  | 68.78  | 81.99  | 54.58  | 0.49  | 0.58  | 0.35  |
| Sudan                            | 18.27  | 25.04  | 11.57  | 20.29  | 27.71  | 12.93  | 0.11  | 0.11  | 0.12  |
| Suriname                         | 76.17  | 82.78  | 69.78  | 112.58 | 126.91 | 98.31  | 0.47  | 0.53  | 0.41  |
| Swaziland                        | 33.31  | 28.96  | 38.16  | 43.61  | 39.24  | 48.06  | 0.31  | 0.35  | 0.25  |
| Sweden                           | 35.21  | 43.54  | 26.69  | 35.76  | 44.46  | 27.05  | 0.00  | 0.02  | 0.00  |
| Switzerland                      | 51.38  | 62.83  | 39.39  | 56.14  | 66.54  | 45.5   | 0.09  | 0.06  | 0.14  |
| Syria                            | 16.21  | 21.54  | 11.05  | 20.08  | 27.72  | 12.63  | 0.23  | 0.28  | 0.13  |
| Taiwan                           | 90.72  | 87.76  | 93.47  | 223.03 | 225.82 | 220.24 | 1.51  | 1.60  | 1.43  |
| Tajikistan                       | 22.57  | 25.66  | 19.45  | 23.33  | 22.92  | 23.73  | 0.03  | -0.11 | 0.22  |
| Tanzania                         | 44.5   | 39.92  | 49.15  | 51.99  | 44.38  | 59.68  | 0.19  | 0.13  | 0.24  |
| Thailand                         | 33.21  | 39.17  | 27.14  | 63.31  | 74.87  | 51.42  | 0.90  | 0.90  | 0.90  |
| The Bahamas                      | 91.26  | 101.13 | 81.25  | 173    | 190.79 | 154.44 | 0.87  | 0.86  | 0.88  |
| The Gambia                       | 48.74  | 35.2   | 62.08  | 48.66  | 36.74  | 60.81  | 0.00  | 0.04  | -0.02 |
| Timor-Leste                      | 17.21  | 18.65  | 15.8   | 31.71  | 35.48  | 28.06  | 0.86  | 0.92  | 0.79  |

|                               |          |          |          |          |          |          |       |       |       |
|-------------------------------|----------|----------|----------|----------|----------|----------|-------|-------|-------|
| Togo                          | 52.28    | 46.63    | 58.07    | 53.2     | 46.61    | 59.93    | 0.03  | 0.01  | 0.05  |
| Tonga                         | 25.67    | 31.12    | 20.35    | 37.82    | 48.54    | 27.16    | 0.47  | 0.56  | 0.33  |
| Trinidad and Tobago           | 84.66    | 88.68    | 80.6     | 146.16   | 156.39   | 135.66   | 0.71  | 0.74  | 0.67  |
| Tunisia                       | 34.47    | 46.53    | 22.56    | 54.63    | 75.37    | 33.39    | 0.56  | 0.60  | 0.46  |
| Turkey                        | 34.6     | 46.89    | 22.02    | 55.92    | 77.12    | 33.98    | 0.61  | 0.63  | 0.53  |
| Turkmenistan                  | 20.55    | 24.07    | 16.92    | 25.6     | 28.36    | 22.74    | 0.24  | 0.17  | 0.33  |
| Uganda                        | 46.95    | 41.58    | 52.38    | 44.21    | 39.99    | 48.43    | -0.04 | -0.03 | -0.06 |
| Ukraine                       | 33.28    | 45.02    | 19.62    | 46.08    | 61.21    | 28.2     | 0.38  | 0.35  | 0.43  |
| United Arab Emirates          | 11.83    | 17.32    | 8.97     | 15.28    | 21.76    | 12.91    | 0.28  | 0.24  | 0.42  |
| United Kingdom                | 27.8     | 35.67    | 19.47    | 31.14    | 37.45    | 24.67    | 0.12  | 0.05  | 0.26  |
| United States                 | 127.07   | 154.73   | 97.97    | 142      | 165.83   | 117.37   | 0.11  | 0.07  | 0.18  |
| Uruguay                       | 85.36    | 93.31    | 76.92    | 102.33   | 120.01   | 83.39    | 0.19  | 0.28  | 0.08  |
| Uzbekistan                    | 33.47    | 40.55    | 26.23    | 44.52    | 51.05    | 37.78    | 0.32  | 0.25  | 0.43  |
| Vanuatu                       | 21.42    | 21.74    | 21.12    | 26.86    | 30.64    | 23.17    | 0.21  | 0.37  | 0.05  |
| Venezuela                     | 37.03    | 49.63    | 24.63    | 93.21    | 116.19   | 70.02    | 1.49  | 1.32  | 1.80  |
| Vietnam                       | 60.16    | 77.66    | 42.11    | 101.45   | 132.93   | 69.29    | 0.73  | 0.74  | 0.70  |
| Virgin Islands, U.S.          | 96.62    | 97.59    | 95.6     | 251.98   | 247.95   | 256.4    | 1.58  | 1.51  | 1.65  |
| Yemen                         | 13.8     | 19.08    | 8.43     | 14.37    | 18.93    | 9.91     | 0.04  | -0.01 | 0.17  |
| Zambia                        | 44       | 39.71    | 48.36    | 42.35    | 39.25    | 45.45    | -0.03 | 0.00  | -0.05 |
| Zimbabwe                      | 33.18    | 25.87    | 40.55    | 40.18    | 31.85    | 48.75    | 0.21  | 0.23  | 0.21  |
| <b>Ischemic heart disease</b> |          |          |          |          |          |          |       |       |       |
| Afghanistan                   | 766.34   | 682.08   | 846.56   | 936.34   | 844.57   | 1,022.50 | 0.23  | 0.24  | 0.21  |
| Albania                       | 1,479.22 | 1,022.39 | 1,914.29 | 2,647.10 | 1,847.77 | 3,459.31 | 0.78  | 0.79  | 0.80  |
| Algeria                       | 608.14   | 536.18   | 678.33   | 1,214.44 | 1,040.21 | 1,386.27 | 0.97  | 0.91  | 1.01  |
| American Samoa                | 441.24   | 395.52   | 484.50   | 564.38   | 533.64   | 594.96   | 0.27  | 0.35  | 0.22  |
| Andorra                       | 2,055.77 | 1,804.56 | 2,320.64 | 2,282.69 | 1,830.88 | 2,753.47 | 0.10  | 0.01  | 0.17  |
| Angola                        | 226.16   | 200.60   | 252.35   | 210.95   | 189.88   | 232.30   | -0.06 | -0.05 | -0.07 |
| Antigua and Barbuda           | 1,146.08 | 1,070.28 | 1,227.16 | 1,261.34 | 1,137.25 | 1,396.67 | 0.10  | 0.06  | 0.14  |
| Argentina                     | 713.52   | 468.30   | 968.40   | 733.67   | 519.20   | 957.48   | 0.03  | 0.11  | -0.01 |
| Armenia                       | 2,301.45 | 2,263.47 | 2,341.71 | 3,641.92 | 3,525.29 | 3,776.25 | 0.56  | 0.54  | 0.59  |
| Australia                     | 1,438.97 | 1,123.35 | 1,756.30 | 1,207.58 | 940.17   | 1,475.68 | -0.17 | -0.17 | -0.17 |
| Austria                       | 2,257.72 | 2,041.83 | 2,492.95 | 2,264.05 | 1,778.41 | 2,773.81 | -0.01 | -0.13 | 0.10  |
| Azerbaijan                    | 1,696.51 | 1,713.02 | 1,679.28 | 2,258.05 | 2,130.11 | 2,387.50 | 0.32  | 0.23  | 0.41  |
| Bahrain                       | 844.64   | 684.27   | 962.59   | 1,396.54 | 1,164.52 | 1,538.62 | 0.64  | 0.69  | 0.59  |
| Bangladesh                    | 727.92   | 603.99   | 846.34   | 1,152.40 | 948.37   | 1,352.50 | 0.60  | 0.58  | 0.62  |
| Barbados                      | 1,382.91 | 1,362.06 | 1,405.39 | 2,053.91 | 1,892.04 | 2,229.84 | 0.47  | 0.38  | 0.57  |
| Belarus                       | 4,111.24 | 3,667.80 | 4,613.49 | 5,629.90 | 4,783.68 | 6,611.53 | 0.36  | 0.29  | 0.42  |
| Belgium                       | 2,376.29 | 2,024.01 | 2,744.90 | 2,366.18 | 1,875.27 | 2,876.45 | -0.01 | -0.08 | 0.03  |
| Belize                        | 586.84   | 501.50   | 670.75   | 655.95   | 547.27   | 765.28   | 0.12  | 0.09  | 0.15  |
| Benin                         | 549.03   | 415.98   | 690.59   | 683.37   | 485.72   | 881.79   | 0.25  | 0.17  | 0.29  |
| Bermuda                       | 1,023.60 | 905.58   | 1,143.11 | 1,390.71 | 1,266.34 | 1,517.47 | 0.35  | 0.39  | 0.32  |
| Bhutan                        | 630.02   | 505.23   | 745.97   | 1,038.01 | 826.73   | 1,219.91 | 0.63  | 0.62  | 0.62  |
| Bolivia                       | 402.59   | 341.11   | 463.65   | 635.47   | 540.34   | 730.25   | 0.55  | 0.56  | 0.55  |
| Bosnia and Herzegovina        | 2,022.16 | 1,620.91 | 2,423.85 | 3,750.04 | 2,876.96 | 4,631.21 | 0.83  | 0.76  | 0.88  |
| Botswana                      | 568.26   | 465.25   | 673.73   | 649.91   | 498.09   | 801.87   | 0.14  | 0.07  | 0.18  |
| Brazil                        | 973.28   | 782.38   | 1,167.20 | 1,627.34 | 1,308.27 | 1,957.08 | 0.66  | 0.66  | 0.66  |
| Brunei                        | 289.96   | 226.67   | 346.61   | 446.79   | 356.28   | 531.97   | 0.49  | 0.52  | 0.49  |
| Bulgaria                      | 3,808.60 | 2,888.47 | 4,754.63 | 4,585.86 | 3,760.82 | 5,451.73 | 0.20  | 0.29  | 0.14  |
| Burkina Faso                  | 706.36   | 489.12   | 933.71   | 667.91   | 471.57   | 866.81   | -0.05 | -0.03 | -0.06 |
| Burundi                       | 755.45   | 635.39   | 879.72   | 669.23   | 518.94   | 822.79   | -0.08 | -0.16 | -0.03 |
| Cambodia                      | 442.80   | 387.53   | 502.01   | 641.32   | 596.20   | 688.71   | 0.48  | 0.56  | 0.41  |
| Cameroon                      | 549.89   | 382.2    | 719.69   | 564.25   | 393.42   | 734.98   | 0.04  | 0.04  | 0.04  |
| Canada                        | 1,667.19 | 1,326.07 | 2,014.17 | 1,509.83 | 1,289.50 | 1,733.25 | -0.10 | -0.03 | -0.15 |
| Cape Verde                    | 583.51   | 451.5    | 729.49   | 827.54   | 684.21   | 974.72   | 0.41  | 0.50  | 0.33  |
| Central African Republic      | 276.89   | 243.72   | 311.18   | 251.14   | 221.94   | 281.12   | -0.09 | -0.09 | -0.09 |
| Chad                          | 590.86   | 435.78   | 748.2    | 541.03   | 402.42   | 679.32   | -0.08 | -0.07 | -0.09 |
| Chile                         | 511.26   | 360.18   | 666.43   | 768.78   | 548.28   | 995.18   | 0.48  | 0.50  | 0.47  |
| China                         | 663.10   | 565.65   | 755.54   | 1,416.36 | 1,191.44 | 1,628.22 | 1.18  | 1.13  | 1.21  |
| Colombia                      | 805.77   | 816.90   | 794.49   | 1,244.51 | 1,222.07 | 1,267.63 | 0.53  | 0.49  | 0.58  |
| Comoros                       | 633.61   | 486.49   | 779.79   | 606.74   | 447.95   | 762.66   | -0.04 | -0.08 | -0.02 |
| Congo                         | 319.40   | 282.23   | 356.76   | 285.19   | 252.65   | 317.69   | -0.10 | -0.10 | -0.11 |

|                                  |          |          |          |          |          |          |       |       |       |
|----------------------------------|----------|----------|----------|----------|----------|----------|-------|-------|-------|
| Costa Rica                       | 846.03   | 811.78   | 879.74   | 1,512.68 | 1424.06  | 1,601.18 | 0.77  | 0.73  | 0.80  |
| Cote d'Ivoire                    | 511.09   | 320.1    | 687.07   | 540.07   | 349.8    | 723.85   | 0.07  | 0.10  | 0.07  |
| Croatia                          | 3,518.14 | 2,904.57 | 4,170.14 | 4,402.83 | 3,633.00 | 5,229.02 | 0.24  | 0.24  | 0.24  |
| Cuba                             | 1,525.01 | 1,324.99 | 1,722.03 | 2,264.46 | 2,016.13 | 2,510.45 | 0.47  | 0.51  | 0.44  |
| Cyprus                           | 1,168.07 | 939.64   | 1,402.33 | 1,362.87 | 1064.1   | 1,682.25 | 0.14  | 0.11  | 0.17  |
| Czech Republic                   | 3,946.07 | 3,629.59 | 4,281.55 | 4,115.80 | 3,605.69 | 4,642.31 | 0.03  | -0.01 | 0.07  |
| Democratic Republic of the Congo | 242.9    | 224.06   | 262.2    | 225.95   | 199.98   | 252.05   | -0.07 | -0.11 | -0.04 |
| Denmark                          | 2,617.60 | 2,143.27 | 3,105.78 | 2,340.11 | 1,700.20 | 2,990.24 | -0.11 | -0.21 | -0.05 |
| Djibouti                         | 799.68   | 664.41   | 933.36   | 1,036.41 | 841.64   | 1,229.44 | 0.29  | 0.26  | 0.31  |
| Dominica                         | 1,078.80 | 937.80   | 1,220.85 | 1,483.48 | 1,324.79 | 1,644.68 | 0.38  | 0.41  | 0.36  |
| Dominican Republic               | 718.72   | 581.05   | 854.56   | 1,239.47 | 1,081.07 | 1,398.91 | 0.72  | 0.85  | 0.64  |
| Ecuador                          | 572.91   | 511.2    | 633.94   | 827.88   | 733.92   | 921.86   | 0.45  | 0.44  | 0.46  |
| Egypt                            | 1,009.24 | 886.61   | 1,131.02 | 1,311.23 | 1,108.70 | 1,509.57 | 0.30  | 0.25  | 0.34  |
| El Salvador                      | 596.18   | 584.22   | 608.71   | 1,053.51 | 1,047.78 | 1,059.99 | 0.77  | 0.79  | 0.76  |
| Equatorial Guinea                | 301.65   | 267.04   | 334.76   | 299.70   | 230.96   | 365.08   | 0.00  | -0.13 | 0.09  |
| Eritrea                          | 551.27   | 460.59   | 643.09   | 606.7    | 512.74   | 700.32   | 0.11  | 0.12  | 0.10  |
| Estonia                          | 3,861.36 | 3,529.26 | 4,239.28 | 4,113.60 | 3,803.27 | 4,477.98 | 0.06  | 0.07  | 0.05  |
| Ethiopia                         | 928.88   | 690.04   | 1,169.24 | 1,059.65 | 834.64   | 1,285.41 | 0.15  | 0.22  | 0.11  |
| Federated States of Micronesia   | 458.13   | 429.76   | 485.28   | 661.28   | 617.97   | 702.53   | 0.44  | 0.43  | 0.44  |
| Fiji                             | 483.18   | 422.37   | 542.12   | 826.63   | 744.71   | 905.83   | 0.70  | 0.75  | 0.66  |
| Finland                          | 2,684.26 | 2,326.78 | 3,063.54 | 2,384.36 | 1,906.67 | 2,876.72 | -0.12 | -0.19 | -0.08 |
| France                           | 1,566.33 | 1,291.50 | 1,856.13 | 1,497.04 | 1185.14  | 1,829.12 | -0.05 | -0.09 | -0.02 |
| Gabon                            | 408.31   | 375.73   | 442.26   | 334.50   | 299.87   | 368.36   | -0.18 | -0.20 | -0.17 |
| Georgia                          | 3,541.77 | 3,577.30 | 3,502.58 | 3,910.52 | 3,890.42 | 3,932.51 | 0.10  | 0.08  | 0.11  |
| Germany                          | 2,681.89 | 2,423.26 | 2,959.76 | 2,489.69 | 2,013.11 | 2,982.45 | -0.08 | -0.17 | -0.01 |
| Ghana                            | 614.43   | 408.95   | 813.42   | 772.50   | 536.09   | 1,011.31 | 0.27  | 0.32  | 0.27  |
| Greece                           | 1,930.97 | 1,478.36 | 2,395.21 | 2,221.53 | 1,714.51 | 2,753.66 | 0.14  | 0.15  | 0.14  |
| Greenland                        | 682.54   | 502.98   | 837.94   | 842.23   | 552.68   | 1,093.28 | 0.21  | 0.09  | 0.27  |
| Grenada                          | 1,025.33 | 988.51   | 1,063.11 | 1,130.31 | 1,071.05 | 1,189.20 | 0.12  | 0.09  | 0.14  |
| Guam                             | 573.35   | 541.29   | 601.36   | 1,190.70 | 1,136.45 | 1,243.43 | 1.10  | 1.11  | 1.10  |
| Guatemala                        | 466.92   | 436.92   | 497.36   | 598.64   | 587.86   | 609.90   | 0.31  | 0.37  | 0.26  |
| Guinea                           | 594.42   | 403.47   | 789.64   | 687.94   | 460.53   | 914.28   | 0.16  | 0.14  | 0.16  |
| Guinea-Bissau                    | 599.75   | 409.62   | 794.47   | 665.22   | 447.05   | 886.11   | 0.12  | 0.10  | 0.13  |
| Guyana                           | 605.48   | 514.98   | 698.92   | 1,041.84 | 911.28   | 1,171.14 | 0.73  | 0.77  | 0.69  |
| Haiti                            | 468.54   | 391.89   | 547.46   | 598.11   | 518.98   | 678.97   | 0.31  | 0.35  | 0.29  |
| Honduras                         | 423.81   | 394.16   | 453.24   | 765.66   | 708.13   | 823.19   | 0.81  | 0.80  | 0.83  |
| Hungary                          | 4,159.25 | 3,437.13 | 4,940.40 | 4,407.39 | 3,657.85 | 5,233.66 | 0.05  | 0.06  | 0.05  |
| Iceland                          | 1,628.75 | 1,305.95 | 1,948.71 | 1,691.70 | 1263.25  | 2,129.33 | 0.03  | -0.04 | 0.08  |
| India                            | 967.92   | 734.80   | 1,185.05 | 1,438.00 | 1,121.30 | 1,732.31 | 0.49  | 0.53  | 0.47  |
| Indonesia                        | 780.05   | 660.83   | 898.27   | 1,135.16 | 919.57   | 1,347.65 | 0.48  | 0.41  | 0.53  |
| Iran                             | 633.00   | 484.61   | 776.00   | 1,583.23 | 1,263.48 | 1,898.19 | 1.46  | 1.56  | 1.41  |
| Iraq                             | 865.61   | 743.21   | 985.78   | 899.38   | 792.04   | 1,004.05 | 0.04  | 0.06  | 0.02  |
| Ireland                          | 1,636.41 | 1,286.81 | 1,989.10 | 1,403.17 | 1012.17  | 1,805.75 | -0.15 | -0.22 | -0.10 |
| Israel                           | 1,601.26 | 998.64   | 2,206.08 | 1,375.71 | 854.26   | 1,905.99 | -0.15 | -0.15 | -0.14 |
| Italy                            | 2,172.62 | 1,798.35 | 2,569.73 | 2,091.55 | 1,686.30 | 2,522.40 | -0.05 | -0.07 | -0.03 |
| Jamaica                          | 935.85   | 820.55   | 1,054.10 | 1,280.59 | 1,107.45 | 1,455.10 | 0.35  | 0.34  | 0.36  |
| Japan                            | 1,034.13 | 955.93   | 1,115.14 | 1,632.30 | 1,485.03 | 1,787.40 | 0.55  | 0.53  | 0.56  |
| Jordan                           | 745.95   | 636.98   | 844.56   | 991.35   | 848.17   | 1,127.60 | 0.31  | 0.32  | 0.32  |
| Kazakhstan                       | 2,411.58 | 2,497.44 | 2,320.33 | 2,865.64 | 2,785.95 | 2,951.03 | 0.19  | 0.12  | 0.27  |
| Kenya                            | 632.06   | 504.72   | 760.29   | 668.56   | 549.14   | 787.96   | 0.06  | 0.09  | 0.04  |
| Kiribati                         | 452.69   | 447.15   | 458.35   | 582.45   | 572.68   | 592.48   | 0.29  | 0.28  | 0.30  |
| Kuwait                           | 662.67   | 433.64   | 862.99   | 970.27   | 766.52   | 1,129.30 | 0.44  | 0.74  | 0.29  |
| Kyrgyzstan                       | 1,712.65 | 1,775.06 | 1,647.56 | 1,919.85 | 1,820.85 | 2,020.96 | 0.12  | 0.02  | 0.23  |
| Laos                             | 447.51   | 445.24   | 449.79   | 586.75   | 578.24   | 595.35   | 0.33  | 0.31  | 0.35  |
| Latvia                           | 4,055.08 | 3,471.13 | 4,727.69 | 4,333.30 | 3,834.83 | 4,913.83 | 0.06  | 0.09  | 0.03  |
| Lebanon                          | 1,134.14 | 957.45   | 1,315.68 | 1,571.87 | 1,311.13 | 1,829.98 | 0.37  | 0.35  | 0.37  |
| Lesotho                          | 766.37   | 629.41   | 911.39   | 653.36   | 590.44   | 717.55   | -0.15 | -0.06 | -0.22 |
| Liberia                          | 531.78   | 340.14   | 724.5    | 728.68   | 492.32   | 961.22   | 0.38  | 0.45  | 0.33  |
| Libya                            | 544.98   | 462.10   | 619.21   | 1,149.85 | 1,018.63 | 1,279.51 | 1.09  | 1.18  | 1.06  |
| Lithuania                        | 4,310.51 | 3,697.75 | 4,992.46 | 4,949.82 | 4,335.35 | 5,664.43 | 0.13  | 0.16  | 0.12  |
| Luxembourg                       | 1,465.23 | 1,380.96 | 1,552.95 | 1,393.16 | 1,211.18 | 1,575.87 | -0.05 | -0.12 | 0.01  |

|                                  |          |          |          |          |          |          |       |       |       |
|----------------------------------|----------|----------|----------|----------|----------|----------|-------|-------|-------|
| Macedonia                        | 2,057.48 | 1,432.50 | 2,675.13 | 2,948.16 | 2,151.13 | 3,752.21 | 0.42  | 0.49  | 0.39  |
| Madagascar                       | 896.48   | 661.43   | 1,132.29 | 892.37   | 708.88   | 1,077.00 | 0.01  | 0.08  | -0.03 |
| Malawi                           | 680.9    | 619.63   | 744.33   | 649.6    | 593.61   | 705.8    | -0.03 | -0.03 | -0.03 |
| Malaysia                         | 718.56   | 629.52   | 804.97   | 1,179.61 | 1,017.15 | 1,345.08 | 0.64  | 0.61  | 0.67  |
| Maldives                         | 553.63   | 348.93   | 748.02   | 742.81   | 586.63   | 898.12   | 0.34  | 0.67  | 0.20  |
| Mali                             | 455.23   | 301.17   | 612.64   | 380.88   | 257.39   | 501.93   | -0.15 | -0.14 | -0.17 |
| Malta                            | 1,501.58 | 1,273.52 | 1,737.76 | 2,138.73 | 1,646.21 | 2,635.23 | 0.40  | 0.27  | 0.48  |
| Marshall Islands                 | 381.20   | 349.70   | 411.32   | 569.63   | 528.88   | 608.99   | 0.49  | 0.51  | 0.48  |
| Mauritania                       | 550.61   | 376.06   | 726.20   | 636.08   | 431.67   | 837.66   | 0.16  | 0.15  | 0.16  |
| Mauritius                        | 900.78   | 794.49   | 1,007.51 | 1,604.53 | 1,393.82 | 1,820.44 | 0.76  | 0.74  | 0.78  |
| Mexico                           | 672.75   | 630.58   | 715.35   | 1,083.74 | 996.41   | 1,171.96 | 0.60  | 0.57  | 0.63  |
| Moldova                          | 2,808.24 | 2,413.29 | 3,241.54 | 3,058.60 | 2,497.96 | 3,664.73 | 0.07  | 0.02  | 0.11  |
| Mongolia                         | 1,308.53 | 1,234.62 | 1,384.18 | 1,761.22 | 1,682.40 | 1,841.64 | 0.34  | 0.35  | 0.32  |
| Montenegro                       | 1,737.84 | 1,352.61 | 2,126.44 | 2,992.90 | 2,256.30 | 3,747.03 | 0.70  | 0.65  | 0.74  |
| Morocco                          | 789.71   | 675.41   | 904.47   | 1,491.54 | 1,241.51 | 1,747.40 | 0.87  | 0.82  | 0.91  |
| Mozambique                       | 879.74   | 753.4    | 1017.48  | 897.23   | 779.39   | 1,020.50 | 0.03  | 0.04  | 0.01  |
| Myanmar                          | 416.35   | 345.14   | 490.47   | 582.52   | 486.82   | 682.60   | 0.43  | 0.44  | 0.43  |
| Namibia                          | 575.68   | 436.91   | 720.48   | 605.34   | 475.3    | 742.33   | 0.05  | 0.09  | 0.03  |
| Nepal                            | 577.12   | 559.35   | 595.15   | 958.62   | 848.67   | 1,075.55 | 0.67  | 0.52  | 0.83  |
| Netherlands                      | 2,187.88 | 1,808.90 | 2,575.46 | 2,000.25 | 1,507.52 | 2,501.23 | -0.09 | -0.17 | -0.04 |
| New Zealand                      | 1,664.01 | 1,179.64 | 2,163.23 | 1,768.21 | 1,162.22 | 2,397.38 | 0.05  | -0.03 | 0.09  |
| Nicaragua                        | 559.79   | 559.67   | 559.9    | 873.70   | 866.66   | 880.94   | 0.57  | 0.55  | 0.59  |
| Niger                            | 451.89   | 302.53   | 606.29   | 606.22   | 375.51   | 833.19   | 0.36  | 0.25  | 0.40  |
| Nigeria                          | 581.06   | 394.83   | 763.57   | 589.69   | 395.04   | 777.1    | 0.02  | 0.00  | 0.02  |
| North Korea                      | 541.25   | 554.83   | 526.86   | 1,105.96 | 1,110.82 | 1,100.88 | 1.05  | 1.01  | 1.10  |
| Northern Mariana Islands         | 382.6    | 291.68   | 464.32   | 470.55   | 329.34   | 612.76   | 0.25  | 0.14  | 0.35  |
| Norway                           | 2,218.69 | 1,758.25 | 2,689.53 | 1,742.88 | 1,353.18 | 2,128.04 | -0.22 | -0.23 | -0.22 |
| Oman                             | 490.32   | 456.27   | 517.49   | 849.38   | 708.63   | 920.76   | 0.73  | 0.55  | 0.77  |
| Pakistan                         | 854.78   | 636.53   | 1,057.32 | 1,137.29 | 885.22   | 1,375.92 | 0.34  | 0.39  | 0.31  |
| Palestine                        | 545.60   | 498.03   | 592.00   | 806.59   | 728.80   | 882.21   | 0.46  | 0.45  | 0.47  |
| Panama                           | 792.91   | 750.1    | 834.78   | 1,285.17 | 1219.47  | 1,350.50 | 0.65  | 0.65  | 0.66  |
| Papua New Guinea                 | 305.63   | 273.73   | 336.07   | 474.52   | 421.12   | 525.83   | 0.55  | 0.54  | 0.57  |
| Paraguay                         | 1,102.87 | 770.04   | 1,428.13 | 1,469.47 | 988.65   | 1,935.81 | 0.32  | 0.27  | 0.34  |
| Peru                             | 557.60   | 487.35   | 627.88   | 736.54   | 654.05   | 819.15   | 0.32  | 0.34  | 0.31  |
| Philippines                      | 718.70   | 622.16   | 813.24   | 1,260.29 | 1,080.37 | 1,436.90 | 0.77  | 0.75  | 0.79  |
| Poland                           | 3,631.21 | 3,050.15 | 4,242.32 | 4,262.24 | 3,534.65 | 5,045.28 | 0.16  | 0.15  | 0.18  |
| Portugal                         | 2,177.38 | 2,106.38 | 2,253.73 | 2,485.48 | 2,358.04 | 2,621.37 | 0.12  | 0.11  | 0.14  |
| Puerto Rico                      | 1,335.48 | 1,179.58 | 1,501.24 | 1,862.06 | 1,763.20 | 1,968.86 | 0.38  | 0.48  | 0.30  |
| Qatar                            | 688.77   | 443.66   | 809.78   | 825.88   | 603.83   | 908.91   | 0.18  | 0.34  | 0.11  |
| Romania                          | 3,618.12 | 2,887.37 | 4,369.89 | 4,512.36 | 3,682.15 | 5,396.02 | 0.24  | 0.27  | 0.22  |
| Russia                           | 5,207.71 | 4,553.26 | 5,950.90 | 6,148.52 | 5,165.41 | 7,303.05 | 0.17  | 0.13  | 0.22  |
| Rwanda                           | 650.52   | 526.46   | 778.96   | 677.07   | 602.7    | 757.97   | 0.05  | 0.15  | -0.02 |
| Saint Lucia                      | 946.77   | 837.97   | 1,058.83 | 1,319.01 | 1,175.86 | 1,467.63 | 0.41  | 0.41  | 0.41  |
| Saint Vincent and the Grenadines | 856.16   | 788.16   | 924.84   | 1,179.20 | 1,027.83 | 1,327.79 | 0.39  | 0.31  | 0.45  |
| Samoa                            | 570.08   | 552.67   | 586.13   | 837.25   | 811.70   | 861.25   | 0.46  | 0.46  | 0.46  |
| Sao Tome and Principe            | 552.37   | 376.62   | 731.37   | 521.64   | 385.27   | 659.05   | -0.05 | 0.02  | -0.10 |
| Saudi Arabia                     | 672.30   | 601.55   | 727.94   | 1,168.57 | 900.84   | 1,374.26 | 0.71  | 0.47  | 0.86  |
| Senegal                          | 550.85   | 386.7    | 716.55   | 569.43   | 446.92   | 696.42   | 0.04  | 0.16  | -0.02 |
| Serbia                           | 2,957.87 | 2,221.97 | 3,713.55 | 4,127.21 | 3,176.62 | 5,124.21 | 0.38  | 0.42  | 0.37  |
| Seychelles                       | 971.42   | 984.91   | 957.86   | 1,346.38 | 1,283.19 | 1,407.89 | 0.38  | 0.30  | 0.46  |
| Sierra Leone                     | 638.63   | 392.1    | 890.27   | 652.61   | 430.66   | 879.12   | 0.04  | 0.12  | 0.01  |
| Singapore                        | 704.34   | 615.25   | 791.12   | 979.95   | 865.19   | 1,098.80 | 0.36  | 0.38  | 0.36  |
| Slovakia                         | 3,111.26 | 2,272.46 | 3,989.68 | 3,496.82 | 2,566.15 | 4,478.82 | 0.11  | 0.12  | 0.11  |
| Slovenia                         | 2,989.08 | 2,522.86 | 3,483.44 | 3,868.63 | 3,033.99 | 4,718.26 | 0.28  | 0.19  | 0.33  |
| Solomon Islands                  | 388.85   | 319.38   | 454.62   | 488.83   | 416.92   | 558.52   | 0.26  | 0.31  | 0.23  |
| Somalia                          | 789.93   | 627.09   | 955.67   | 662.4    | 530.74   | 795.29   | -0.16 | -0.15 | -0.17 |
| South Africa                     | 776.80   | 672.96   | 883.06   | 974.06   | 854.40   | 1,097.95 | 0.25  | 0.26  | 0.24  |
| South Korea                      | 396.46   | 384.73   | 408.13   | 918.71   | 873.83   | 964.14   | 1.25  | 1.21  | 1.28  |
| South Sudan                      | 821.17   | 642.63   | 1,001.39 | 816.02   | 654.85   | 976.73   | 0.00  | 0.02  | -0.02 |
| Spain                            | 1,742.94 | 1,483.10 | 2,013.65 | 1,689.40 | 1,421.64 | 1,964.08 | -0.04 | -0.05 | -0.04 |
| Sri Lanka                        | 769.03   | 658.74   | 877.20   | 1,584.94 | 1,433.74 | 1,747.47 | 1.09  | 1.20  | 1.03  |

|                        |          |          |          |          |          |          |       |       |       |
|------------------------|----------|----------|----------|----------|----------|----------|-------|-------|-------|
| Sudan                  | 626.13   | 516.62   | 734.78   | 850.71   | 720.38   | 980.08   | 0.36  | 0.40  | 0.34  |
| Suriname               | 799.56   | 703.47   | 892.59   | 1,152.62 | 1,056.37 | 1,248.52 | 0.44  | 0.50  | 0.40  |
| Swaziland              | 594.8    | 484.59   | 718.06   | 638.04   | 557.70   | 720.07   | 0.07  | 0.15  | 0.00  |
| Sweden                 | 2,629.01 | 1,977.28 | 3,296.54 | 2,610.63 | 1,804.13 | 3,418.73 | -0.02 | -0.09 | 0.02  |
| Switzerland            | 2,017.49 | 1,680.45 | 2,370.46 | 1,915.78 | 1,417.81 | 2,424.97 | -0.06 | -0.16 | 0.01  |
| Syria                  | 497.47   | 417.38   | 574.99   | 970.94   | 853.95   | 1,085.07 | 0.94  | 1.03  | 0.87  |
| Taiwan                 | 823.76   | 698.79   | 939.76   | 1,601.40 | 1497.31  | 1,705.83 | 0.99  | 1.17  | 0.87  |
| Tajikistan             | 1,427.30 | 1,384.19 | 1,470.92 | 1,317.38 | 1,133.33 | 1,497.14 | -0.08 | -0.18 | 0.02  |
| Tanzania               | 879.77   | 716.64   | 1,045.80 | 890.93   | 708.22   | 1,075.88 | 0.03  | 0.00  | 0.05  |
| Thailand               | 652.90   | 548.57   | 759.14   | 1,674.79 | 1,478.30 | 1,876.94 | 1.56  | 1.69  | 1.47  |
| The Bahamas            | 806.71   | 747.77   | 866.47   | 1,462.85 | 1,350.57 | 1,579.95 | 0.79  | 0.78  | 0.80  |
| The Gambia             | 531.31   | 305.68   | 753.73   | 581.81   | 367.61   | 800.23   | 0.10  | 0.20  | 0.07  |
| Timor-Leste            | 324.65   | 267.92   | 379.95   | 652.34   | 565.19   | 736.80   | 1.03  | 1.13  | 0.96  |
| Togo                   | 510.3    | 353.23   | 671.44   | 564.34   | 397.2    | 735.44   | 0.12  | 0.13  | 0.11  |
| Tonga                  | 634.50   | 605.52   | 662.77   | 825.63   | 818.21   | 833.00   | 0.30  | 0.35  | 0.25  |
| Trinidad and Tobago    | 977.50   | 889.66   | 1,066.00 | 1,603.38 | 1,464.38 | 1,746.07 | 0.62  | 0.63  | 0.62  |
| Tunisia                | 1,061.84 | 888.64   | 1,232.93 | 2,131.60 | 1852.44  | 2,417.31 | 0.98  | 1.06  | 0.93  |
| Turkey                 | 1,278.63 | 1,075.50 | 1,486.75 | 1,552.34 | 1450.56  | 1,657.73 | 0.21  | 0.34  | 0.11  |
| Turkmenistan           | 1,259.65 | 1,229.81 | 1,290.32 | 1,612.81 | 1,461.16 | 1,769.64 | 0.27  | 0.18  | 0.36  |
| Uganda                 | 602.78   | 489.59   | 717.45   | 474.14   | 395.26   | 553.1    | -0.20 | -0.18 | -0.21 |
| Ukraine                | 5,126.24 | 4,744.17 | 5,570.86 | 6,769.93 | 6,011.52 | 7,665.72 | 0.31  | 0.26  | 0.37  |
| United Arab Emirates   | 303.18   | 234.09   | 339.06   | 462.65   | 292.34   | 524.73   | 0.51  | 0.23  | 0.53  |
| United Kingdom         | 2,951.95 | 2,216.22 | 3,730.18 | 2,406.33 | 1,881.44 | 2,944.35 | -0.19 | -0.15 | -0.22 |
| United States          | 2,068.35 | 1,775.03 | 2,376.82 | 1,771.15 | 1,552.63 | 1,997.05 | -0.15 | -0.13 | -0.17 |
| Uruguay                | 867.85   | 665.76   | 1,082.39 | 925.99   | 781.23   | 1,081.06 | 0.06  | 0.17  | -0.01 |
| Uzbekistan             | 1,551.91 | 1,529.99 | 1,574.32 | 2,025.09 | 1,813.22 | 2,243.93 | 0.30  | 0.18  | 0.42  |
| Vanuatu                | 504.30   | 404.90   | 598.30   | 617.56   | 541.30   | 691.93   | 0.18  | 0.30  | 0.11  |
| Venezuela              | 671.96   | 681.54   | 662.52   | 1,173.45 | 1,169.84 | 1,177.08 | 0.73  | 0.70  | 0.75  |
| Vietnam                | 773.31   | 796.94   | 748.95   | 1,018.05 | 1,036.97 | 998.73   | 0.35  | 0.32  | 0.38  |
| Virgin Islands, U.S.   | 993.93   | 890.56   | 1,103.42 | 2,153.62 | 1,969.47 | 2,356.03 | 1.14  | 1.19  | 1.11  |
| Yemen                  | 542.68   | 504.36   | 581.69   | 788.38   | 698.33   | 876.59   | 0.45  | 0.38  | 0.50  |
| Zambia                 | 714.43   | 587.69   | 843.32   | 751.27   | 630.39   | 872.50   | 0.06  | 0.08  | 0.05  |
| Zimbabwe               | 728.25   | 497.36   | 961.07   | 504.83   | 365.99   | 647.74   | -0.31 | -0.26 | -0.32 |
| <b>Ischemic stroke</b> |          |          |          |          |          |          |       |       |       |
| Afghanistan            | 193.87   | 201.20   | 186.9    | 195.79   | 206.09   | 186.11   | 0.01  | 0.03  | 0.00  |
| Albania                | 279.57   | 275.35   | 283.58   | 531.6    | 505.19   | 558.43   | 0.89  | 0.82  | 0.96  |
| Algeria                | 188.62   | 199.06   | 178.43   | 272.27   | 288.83   | 255.93   | 0.42  | 0.43  | 0.41  |
| American Samoa         | 268.99   | 234.73   | 301.43   | 254.54   | 248.94   | 260.11   | -0.06 | 0.06  | -0.14 |
| Andorra                | 290.5    | 289.31   | 291.76   | 351.27   | 339.71   | 363.31   | 0.20  | 0.17  | 0.23  |
| Angola                 | 171.13   | 195.04   | 146.63   | 159.16   | 183.65   | 134.36   | -0.06 | -0.05 | -0.08 |
| Antigua and Barbuda    | 264.63   | 267.01   | 262.07   | 231.64   | 232.67   | 230.51   | -0.13 | -0.13 | -0.12 |
| Argentina              | 291.03   | 290.34   | 291.74   | 295.61   | 300.91   | 290.08   | 0.01  | 0.03  | -0.01 |
| Armenia                | 367.23   | 406.96   | 325.12   | 553.75   | 597.95   | 502.84   | 0.48  | 0.45  | 0.52  |
| Australia              | 310.66   | 311.81   | 309.51   | 339.86   | 338.69   | 341.02   | 0.09  | 0.08  | 0.09  |
| Austria                | 324.31   | 336.14   | 311.41   | 406.6    | 385.3    | 428.97   | 0.24  | 0.14  | 0.36  |
| Azerbaijan             | 339.2    | 383.78   | 292.68   | 414.14   | 451.33   | 376.51   | 0.21  | 0.17  | 0.27  |
| Bahrain                | 198.56   | 199.66   | 197.74   | 251.7    | 267.64   | 241.93   | 0.26  | 0.33  | 0.21  |
| Bangladesh             | 243.91   | 227.44   | 259.64   | 271.28   | 251.87   | 290.31   | 0.12  | 0.11  | 0.13  |
| Barbados               | 277.39   | 286.86   | 267.18   | 353.22   | 359.09   | 346.85   | 0.26  | 0.24  | 0.29  |
| Belarus                | 767.37   | 919.15   | 595.45   | 942.23   | 1,098.17 | 761.34   | 0.22  | 0.19  | 0.26  |
| Belgium                | 328.49   | 331.07   | 325.79   | 377.62   | 372.79   | 382.64   | 0.14  | 0.12  | 0.16  |
| Belize                 | 127.41   | 122.94   | 131.81   | 130.66   | 125.51   | 135.84   | 0.03  | 0.02  | 0.04  |
| Benin                  | 187.99   | 199.67   | 175.56   | 201.9    | 210.65   | 193.12   | 0.08  | 0.06  | 0.11  |
| Bermuda                | 207.33   | 202.98   | 211.74   | 251.77   | 253.67   | 249.84   | 0.21  | 0.24  | 0.17  |
| Bhutan                 | 165.78   | 152.96   | 177.7    | 201.63   | 181.28   | 219.16   | 0.20  | 0.17  | 0.22  |
| Bolivia                | 109.03   | 113.76   | 104.33   | 133.35   | 140.56   | 126.16   | 0.20  | 0.21  | 0.19  |
| Bosnia and Herzegovina | 373.98   | 410.15   | 337.78   | 663.57   | 687.46   | 639.47   | 0.75  | 0.66  | 0.87  |
| Botswana               | 138.16   | 155.07   | 120.84   | 173.24   | 199.46   | 146.99   | 0.25  | 0.28  | 0.21  |
| Brazil                 | 159.97   | 152.25   | 167.8    | 164.63   | 157.61   | 171.87   | 0.02  | 0.03  | 0.02  |
| Brunei                 | 182.92   | 172.08   | 192.62   | 281.28   | 275.96   | 286.28   | 0.49  | 0.55  | 0.45  |
| Bulgaria               | 735.40   | 713.14   | 758.30   | 883.71   | 901.29   | 865.26   | 0.19  | 0.26  | 0.13  |



|                                  |        |        |        |        |        |        |       |       |       |
|----------------------------------|--------|--------|--------|--------|--------|--------|-------|-------|-------|
| Burkina Faso                     | 183.62 | 195.12 | 171.59 | 143.07 | 158.87 | 127.07 | -0.22 | -0.18 | -0.25 |
| Burundi                          | 235.13 | 255.7  | 213.84 | 203.03 | 212.75 | 193.09 | -0.11 | -0.15 | -0.06 |
| Cambodia                         | 180.22 | 174.76 | 186.07 | 232.76 | 244.13 | 220.81 | 0.32  | 0.41  | 0.22  |
| Cameroon                         | 187.05 | 192.45 | 181.57 | 161.88 | 167.53 | 156.23 | -0.12 | -0.12 | -0.12 |
| Canada                           | 289.68 | 295.6  | 283.66 | 373    | 366.86 | 379.22 | 0.27  | 0.23  | 0.31  |
| Cape Verde                       | 271.67 | 279.62 | 262.89 | 272.99 | 299.85 | 245.41 | 0.00  | 0.06  | -0.07 |
| Central African Republic         | 272.85 | 297.34 | 247.52 | 232.59 | 260.84 | 203.59 | -0.15 | -0.12 | -0.18 |
| Chad                             | 161.94 | 168.77 | 155.02 | 141.37 | 147.31 | 135.44 | -0.12 | -0.13 | -0.12 |
| Chile                            | 263.18 | 268.51 | 257.71 | 358.46 | 368.42 | 348.23 | 0.34  | 0.35  | 0.33  |
| China                            | 353.18 | 313.19 | 391.12 | 519.88 | 453.07 | 582.81 | 0.50  | 0.46  | 0.53  |
| Colombia                         | 76.67  | 80.97  | 72.31  | 101.34 | 106.23 | 96.3   | 0.31  | 0.30  | 0.32  |
| Comoros                          | 210.33 | 226    | 194.76 | 195.75 | 209.09 | 182.66 | -0.07 | -0.07 | -0.06 |
| Congo                            | 286.88 | 327.92 | 245.63 | 237.59 | 283.68 | 191.57 | -0.17 | -0.13 | -0.22 |
| Costa Rica                       | 63.12  | 64.78  | 61.49  | 95.24  | 98.27  | 92.22  | 0.49  | 0.50  | 0.48  |
| Cote d'Ivoire                    | 217.31 | 196.24 | 236.72 | 213.98 | 198.11 | 229.31 | -0.01 | 0.02  | -0.02 |
| Croatia                          | 648.56 | 699.62 | 594.30 | 810.64 | 830.37 | 789.47 | 0.24  | 0.18  | 0.32  |
| Cuba                             | 285.53 | 282.08 | 288.93 | 373.84 | 371.46 | 376.2  | 0.30  | 0.31  | 0.29  |
| Cyprus                           | 193.54 | 177.69 | 209.79 | 260.49 | 240.7  | 281.64 | 0.32  | 0.33  | 0.31  |
| Czech Republic                   | 568.76 | 603.60 | 531.84 | 601.26 | 622.96 | 578.86 | 0.05  | 0.02  | 0.08  |
| Democratic Republic of the Congo | 162.12 | 190.48 | 133.07 | 152.97 | 174.26 | 131.58 | -0.05 | -0.08 | -0.01 |
| Denmark                          | 381.34 | 368.49 | 394.56 | 383.33 | 360.95 | 406.07 | 0.00  | -0.02 | 0.02  |
| Djibouti                         | 180.58 | 189.32 | 171.94 | 266.36 | 281.64 | 251.22 | 0.47  | 0.48  | 0.45  |
| Dominica                         | 212.79 | 212.09 | 213.49 | 260.38 | 266.3  | 254.37 | 0.23  | 0.26  | 0.20  |
| Dominican Republic               | 144.53 | 134.65 | 154.27 | 205.56 | 199.92 | 211.23 | 0.42  | 0.47  | 0.37  |
| Ecuador                          | 107.1  | 107.37 | 106.82 | 119.1  | 120.72 | 117.47 | 0.11  | 0.13  | 0.10  |
| Egypt                            | 187.64 | 195.67 | 179.65 | 245.96 | 254.47 | 237.62 | 0.31  | 0.30  | 0.33  |
| El Salvador                      | 56.83  | 57.14  | 56.51  | 79.06  | 82.38  | 75.32  | 0.40  | 0.44  | 0.35  |
| Equatorial Guinea                | 255.29 | 294.94 | 217.35 | 231.1  | 244.2  | 218.63 | -0.09 | -0.17 | 0.01  |
| Eritrea                          | 141.79 | 158.41 | 124.95 | 176.5  | 200.54 | 152.56 | 0.25  | 0.27  | 0.23  |
| Estonia                          | 732.19 | 849.51 | 598.69 | 763.33 | 896.69 | 606.74 | 0.03  | 0.05  | 0.00  |
| Ethiopia                         | 196.31 | 200.91 | 191.68 | 239.39 | 258.97 | 219.73 | 0.23  | 0.30  | 0.16  |
| Federated States of Micronesia   | 267.72 | 248.47 | 286.14 | 310.45 | 296.72 | 323.52 | 0.15  | 0.19  | 0.12  |
| Fiji                             | 265.4  | 250.83 | 279.51 | 350.1  | 346.01 | 354.06 | 0.31  | 0.37  | 0.26  |
| Finland                          | 376.13 | 397.78 | 353.16 | 441.55 | 428.39 | 455.11 | 0.16  | 0.07  | 0.27  |
| France                           | 316.83 | 318.78 | 314.77 | 392.71 | 391.6  | 393.89 | 0.23  | 0.22  | 0.24  |
| Gabon                            | 358.26 | 405    | 309.56 | 270.19 | 318.49 | 222.98 | -0.25 | -0.21 | -0.28 |
| Georgia                          | 679.29 | 738.69 | 613.78 | 806.11 | 848.22 | 760.05 | 0.18  | 0.14  | 0.23  |
| Germany                          | 351.58 | 372.31 | 329.3  | 429.86 | 411    | 449.36 | 0.21  | 0.10  | 0.34  |
| Ghana                            | 179.6  | 203.94 | 156.04 | 192.07 | 212.06 | 171.88 | 0.08  | 0.05  | 0.12  |
| Greece                           | 351.71 | 340.37 | 363.34 | 424.14 | 411.51 | 437.4  | 0.20  | 0.20  | 0.19  |
| Greenland                        | 194.09 | 185.55 | 201.48 | 306.47 | 259.6  | 347.11 | 0.55  | 0.39  | 0.68  |
| Grenada                          | 277.96 | 297.15 | 258.27 | 249.96 | 263.46 | 236.54 | -0.09 | -0.10 | -0.06 |
| Guam                             | 302.55 | 291.68 | 312.04 | 503.39 | 487.03 | 519.29 | 0.68  | 0.68  | 0.69  |
| Guatemala                        | 50.22  | 50.15  | 50.3   | 56.68  | 59.84  | 53.38  | 0.15  | 0.21  | 0.09  |
| Guinea                           | 186.48 | 199.19 | 173.49 | 187.84 | 195.39 | 180.32 | 0.01  | -0.02 | 0.04  |
| Guinea-Bissau                    | 208.78 | 219.26 | 198.04 | 198.4  | 207.45 | 189.24 | -0.04 | -0.05 | -0.03 |
| Guyana                           | 187.00 | 178.8  | 195.46 | 269.88 | 266.14 | 273.57 | 0.45  | 0.49  | 0.41  |
| Haiti                            | 151.07 | 150.21 | 151.96 | 167.66 | 172.95 | 162.25 | 0.14  | 0.17  | 0.11  |
| Honduras                         | 61.31  | 62.47  | 60.16  | 78.58  | 79.88  | 77.28  | 0.29  | 0.28  | 0.29  |
| Hungary                          | 731.03 | 749.77 | 710.77 | 742.77 | 797.62 | 682.31 | 0.01  | 0.06  | -0.05 |
| Iceland                          | 222.64 | 213.94 | 231.27 | 268.43 | 253.16 | 284.03 | 0.19  | 0.17  | 0.21  |
| India                            | 197.6  | 180.87 | 213.19 | 226.33 | 202.46 | 248.5  | 0.15  | 0.12  | 0.17  |
| Indonesia                        | 275.6  | 258.22 | 292.84 | 339.36 | 320.48 | 357.97 | 0.25  | 0.25  | 0.24  |
| Iran                             | 178.26 | 173.88 | 182.49 | 269.83 | 270.74 | 268.93 | 0.49  | 0.53  | 0.45  |
| Iraq                             | 215.95 | 224.24 | 207.81 | 207.99 | 222.01 | 194.33 | -0.04 | -0.01 | -0.07 |
| Ireland                          | 262.66 | 259.46 | 265.89 | 267.59 | 250.02 | 285.69 | 0.01  | -0.05 | 0.06  |
| Israel                           | 214.23 | 201.62 | 226.89 | 228.57 | 218.1  | 239.21 | 0.06  | 0.08  | 0.05  |
| Italy                            | 336.23 | 323.3  | 349.94 | 382.97 | 370.47 | 396.27 | 0.13  | 0.14  | 0.12  |
| Jamaica                          | 227.4  | 231.18 | 223.52 | 243.3  | 240.89 | 245.73 | 0.06  | 0.03  | 0.09  |
| Japan                            | 539.58 | 457.89 | 624.21 | 664.92 | 549.39 | 786.59 | 0.21  | 0.18  | 0.23  |
| Jordan                           | 183.15 | 192.75 | 174.47 | 177.79 | 187.87 | 168.2  | -0.04 | -0.04 | -0.05 |

|                                  |        |        |        |        |          |        |       |       |       |
|----------------------------------|--------|--------|--------|--------|----------|--------|-------|-------|-------|
| Kazakhstan                       | 448.70 | 523.91 | 368.78 | 522.23 | 579.32   | 461.06 | 0.16  | 0.11  | 0.25  |
| Kenya                            | 125.1  | 129.44 | 120.74 | 118.79 | 120.57   | 117.01 | -0.05 | -0.06 | -0.03 |
| Kiribati                         | 296.51 | 273.89 | 319.59 | 322.15 | 294.65   | 350.36 | 0.09  | 0.08  | 0.10  |
| Kuwait                           | 152.01 | 128.77 | 172.34 | 184.78 | 180.68   | 187.99 | 0.20  | 0.38  | 0.08  |
| Kyrgyzstan                       | 407.46 | 458.32 | 354.42 | 384.11 | 410.34   | 357.31 | -0.06 | -0.11 | 0.01  |
| Laos                             | 205.86 | 200.05 | 211.67 | 228.07 | 226.16   | 229.99 | 0.12  | 0.14  | 0.11  |
| Latvia                           | 788.69 | 930.39 | 625.47 | 918.10 | 1,051.42 | 762.84 | 0.15  | 0.12  | 0.21  |
| Lebanon                          | 241.52 | 265.86 | 216.52 | 275.37 | 291.32   | 259.58 | 0.13  | 0.08  | 0.18  |
| Lesotho                          | 188.93 | 201.75 | 175.37 | 210.83 | 252.79   | 168.03 | 0.11  | 0.25  | -0.05 |
| Liberia                          | 155.31 | 156.9  | 153.71 | 181.76 | 191.3    | 172.37 | 0.18  | 0.22  | 0.13  |
| Libya                            | 144.39 | 147.93 | 141.22 | 235.42 | 251.28   | 219.75 | 0.62  | 0.68  | 0.55  |
| Lithuania                        | 696.50 | 821.46 | 557.43 | 952.28 | 1,111.20 | 767.46 | 0.35  | 0.34  | 0.36  |
| Luxembourg                       | 331.01 | 338.92 | 322.77 | 336.41 | 328.1    | 344.77 | 0.02  | -0.03 | 0.06  |
| Macedonia                        | 443.04 | 439.15 | 446.89 | 632.29 | 642.09   | 622.41 | 0.41  | 0.45  | 0.38  |
| Madagascar                       | 238.88 | 231.76 | 246.02 | 253.15 | 266.5    | 239.73 | 0.07  | 0.16  | -0.01 |
| Malawi                           | 162.76 | 179.83 | 145.09 | 202.44 | 226.93   | 177.85 | 0.26  | 0.28  | 0.25  |
| Malaysia                         | 200.87 | 191.27 | 210.19 | 267.88 | 252.62   | 283.43 | 0.33  | 0.32  | 0.34  |
| Maldives                         | 143.89 | 106.65 | 179.27 | 164.67 | 152.73   | 176.54 | 0.14  | 0.42  | -0.01 |
| Mali                             | 201.21 | 222.31 | 179.64 | 145.64 | 161.63   | 129.97 | -0.27 | -0.27 | -0.26 |
| Malta                            | 237.17 | 227.51 | 247.17 | 355.4  | 336.31   | 374.65 | 0.47  | 0.46  | 0.48  |
| Marshall Islands                 | 215.83 | 191.01 | 239.58 | 264.24 | 244.43   | 283.37 | 0.22  | 0.28  | 0.18  |
| Mauritania                       | 208.19 | 220.74 | 195.56 | 193.46 | 210.35   | 176.81 | -0.06 | -0.04 | -0.09 |
| Mauritius                        | 303.83 | 290.62 | 317.11 | 419.72 | 405.08   | 434.71 | 0.36  | 0.38  | 0.35  |
| Mexico                           | 58.19  | 60.22  | 56.13  | 60.83  | 58.91    | 62.76  | 0.04  | -0.03 | 0.11  |
| Moldova                          | 569.41 | 637.57 | 494.63 | 604.57 | 667.78   | 536.24 | 0.05  | 0.03  | 0.07  |
| Mongolia                         | 314.18 | 324.64 | 303.47 | 477.35 | 496.74   | 457.57 | 0.51  | 0.52  | 0.50  |
| Montenegro                       | 389.14 | 421.72 | 356.27 | 656    | 691.82   | 619.33 | 0.67  | 0.63  | 0.72  |
| Morocco                          | 171.35 | 183.93 | 158.71 | 249.07 | 266.05   | 231.7  | 0.44  | 0.43  | 0.44  |
| Mozambique                       | 227.54 | 235.12 | 219.27 | 296.01 | 321.57   | 269.28 | 0.31  | 0.37  | 0.24  |
| Myanmar                          | 293.35 | 274.19 | 313.3  | 363.33 | 348.73   | 378.6  | 0.27  | 0.29  | 0.25  |
| Namibia                          | 200.33 | 216.62 | 183.33 | 221.89 | 258.65   | 183.17 | 0.11  | 0.19  | 0.00  |
| Nepal                            | 181.07 | 179.23 | 182.94 | 230.96 | 215.79   | 247.09 | 0.29  | 0.21  | 0.37  |
| Netherlands                      | 299.22 | 304.55 | 293.76 | 352.78 | 335.6    | 370.25 | 0.17  | 0.10  | 0.24  |
| New Zealand                      | 318.38 | 317.39 | 319.39 | 330.3  | 308.02   | 353.44 | 0.02  | -0.04 | 0.09  |
| Nicaragua                        | 57.08  | 60.37  | 53.75  | 75.4   | 80.83    | 69.81  | 0.33  | 0.34  | 0.31  |
| Niger                            | 133.56 | 138.85 | 128.1  | 155.39 | 154.87   | 155.9  | 0.18  | 0.13  | 0.24  |
| Nigeria                          | 154.77 | 162.72 | 146.99 | 140.76 | 145.75   | 135.96 | -0.09 | -0.10 | -0.07 |
| North Korea                      | 302.58 | 339.47 | 263.51 | 458.77 | 489.96   | 426.18 | 0.52  | 0.45  | 0.63  |
| Northern Mariana Islands         | 212.82 | 183.52 | 239.15 | 202.32 | 168.59   | 236.29 | -0.03 | -0.07 | 0.01  |
| Norway                           | 376.16 | 370.81 | 381.63 | 336.68 | 331.46   | 341.83 | -0.11 | -0.11 | -0.12 |
| Oman                             | 127.85 | 140.35 | 117.88 | 170.64 | 181.05   | 165.37 | 0.33  | 0.28  | 0.39  |
| Pakistan                         | 227.32 | 193.11 | 259.07 | 243.01 | 219.77   | 265.01 | 0.07  | 0.14  | 0.03  |
| Palestine                        | 137.66 | 147.95 | 127.61 | 163.46 | 174.28   | 152.94 | 0.17  | 0.17  | 0.18  |
| Panama                           | 83.59  | 80.8   | 86.32  | 111.47 | 110.8    | 112.14 | 0.36  | 0.39  | 0.33  |
| Papua New Guinea                 | 207.86 | 201.1  | 214.32 | 266.82 | 274.54   | 259.41 | 0.29  | 0.37  | 0.21  |
| Paraguay                         | 149.6  | 144.28 | 154.81 | 211.96 | 197.09   | 226.38 | 0.40  | 0.35  | 0.45  |
| Peru                             | 95.47  | 98.02  | 92.91  | 122.47 | 128.84   | 116.1  | 0.28  | 0.31  | 0.25  |
| Philippines                      | 168.44 | 160.48 | 176.23 | 241.72 | 237.66   | 245.7  | 0.45  | 0.49  | 0.41  |
| Poland                           | 457.74 | 488.46 | 425.43 | 579.82 | 595.83   | 562.59 | 0.25  | 0.21  | 0.31  |
| Portugal                         | 409.46 | 398.61 | 421.13 | 475.78 | 465.97   | 486.24 | 0.14  | 0.15  | 0.13  |
| Puerto Rico                      | 225.54 | 216.43 | 235.21 | 304.77 | 313.35   | 295.5  | 0.34  | 0.43  | 0.25  |
| Qatar                            | 127.88 | 112.98 | 135.24 | 144.01 | 144.7    | 143.75 | 0.11  | 0.26  | 0.05  |
| Romania                          | 650.10 | 674.15 | 625.37 | 834.69 | 871.95   | 795.04 | 0.27  | 0.28  | 0.26  |
| Russia                           | 748.74 | 908.81 | 566.96 | 905.27 | 1,039.88 | 747.18 | 0.20  | 0.14  | 0.31  |
| Rwanda                           | 183.17 | 194.46 | 171.48 | 190.24 | 216.75   | 161.41 | 0.04  | 0.12  | -0.05 |
| Saint Lucia                      | 254.9  | 250.64 | 259.28 | 261.65 | 264.62   | 258.57 | 0.04  | 0.06  | 0.02  |
| Saint Vincent and the Grenadines | 208.44 | 223.37 | 193.37 | 243.01 | 246.33   | 239.75 | 0.17  | 0.11  | 0.25  |
| Samoa                            | 305.73 | 288.39 | 321.72 | 334.95 | 331.19   | 338.48 | 0.09  | 0.14  | 0.05  |
| Sao Tome and Principe            | 193.06 | 199.55 | 186.45 | 165.13 | 180.33   | 149.82 | -0.14 | -0.10 | -0.19 |
| Saudi Arabia                     | 144.53 | 148.16 | 141.67 | 176.86 | 166.19   | 185.06 | 0.20  | 0.10  | 0.28  |
| Senegal                          | 179.9  | 183.69 | 176.08 | 165.65 | 180.29   | 150.48 | -0.07 | -0.02 | -0.14 |

|                                                      |         |         |         |         |          |         |       |       |       |
|------------------------------------------------------|---------|---------|---------|---------|----------|---------|-------|-------|-------|
| Serbia                                               | 562.42  | 583.98  | 540.27  | 766.72  | 800.30   | 731.51  | 0.35  | 0.36  | 0.34  |
| Seychelles                                           | 290.33  | 282.43  | 298.26  | 294.58  | 294.12   | 295.02  | 0.01  | 0.04  | -0.02 |
| Sierra Leone                                         | 194.98  | 183.88  | 206.31  | 203.85  | 209.56   | 198.03  | 0.07  | 0.16  | -0.02 |
| Singapore                                            | 334.16  | 332.44  | 335.84  | 482.54  | 474.23   | 491.14  | 0.41  | 0.40  | 0.43  |
| Slovakia                                             | 472.35  | 492.54  | 451.20  | 566.25  | 589.68   | 541.52  | 0.18  | 0.18  | 0.19  |
| Slovenia                                             | 464.91  | 503.19  | 424.33  | 585.83  | 602.23   | 569.13  | 0.24  | 0.18  | 0.32  |
| Solomon Islands                                      | 265.91  | 237.28  | 293.01  | 276.62  | 258.23   | 294.44  | 0.04  | 0.09  | 0.01  |
| Somalia                                              | 204.66  | 217.04  | 192.06  | 198.02  | 214.28   | 181.6   | -0.03 | -0.01 | -0.05 |
| South Africa                                         | 268.77  | 277.31  | 260.04  | 291.4   | 305.56   | 276.74  | 0.08  | 0.10  | 0.06  |
| South Korea                                          | 381.36  | 403.54  | 359.28  | 636.86  | 630.08   | 643.73  | 0.62  | 0.52  | 0.73  |
| South Sudan                                          | 206.35  | 217.37  | 195.23  | 240.8   | 259.98   | 221.68  | 0.17  | 0.20  | 0.14  |
| Spain                                                | 311.95  | 315.71  | 308.04  | 377.09  | 382.68   | 371.35  | 0.20  | 0.20  | 0.19  |
| Sri Lanka                                            | 191.25  | 174.22  | 207.94  | 354.84  | 348.1    | 362.08  | 0.88  | 1.02  | 0.77  |
| Sudan                                                | 164.63  | 170.49  | 158.82  | 195.06  | 207.51   | 182.7   | 0.19  | 0.22  | 0.16  |
| Suriname                                             | 200.82  | 198.64  | 202.93  | 263.33  | 265.39   | 261.28  | 0.31  | 0.33  | 0.29  |
| Swaziland                                            | 145.46  | 152.32  | 137.8   | 196.66  | 229.43   | 163.2   | 0.35  | 0.50  | 0.18  |
| Sweden                                               | 457.74  | 395.93  | 521.06  | 427.8   | 346.39   | 509.37  | -0.08 | -0.13 | -0.04 |
| Switzerland                                          | 303.44  | 301.99  | 304.95  | 317.1   | 309.97   | 324.39  | 0.04  | 0.02  | 0.05  |
| Syria                                                | 154.48  | 151.19  | 157.66  | 226.16  | 231.21   | 221.24  | 0.45  | 0.52  | 0.39  |
| Taiwan                                               | 343.43  | 301.7   | 382.16  | 478.85  | 482.52   | 475.17  | 0.42  | 0.62  | 0.28  |
| Tajikistan                                           | 280.19  | 314.28  | 245.69  | 220.18  | 231.59   | 209.03  | -0.22 | -0.26 | -0.15 |
| Tanzania                                             | 168.33  | 180.13  | 156.31  | 185.74  | 197.56   | 173.76  | 0.12  | 0.11  | 0.13  |
| Thailand                                             | 208.74  | 191.15  | 226.65  | 386.97  | 360.11   | 414.6   | 0.85  | 0.88  | 0.83  |
| The Bahamas                                          | 176.33  | 179.11  | 173.52  | 259.9   | 269.99   | 249.36  | 0.46  | 0.49  | 0.42  |
| The Gambia                                           | 163.37  | 155.57  | 171.06  | 153.67  | 148.58   | 158.85  | -0.06 | -0.04 | -0.07 |
| Timor-Leste                                          | 124.83  | 121.67  | 127.91  | 217.62  | 218.27   | 216.99  | 0.76  | 0.81  | 0.71  |
| Togo                                                 | 168.49  | 174.6   | 162.21  | 154.81  | 157.65   | 151.91  | -0.07 | -0.09 | -0.05 |
| Tonga                                                | 267.37  | 273.58  | 261.3   | 286.6   | 296.26   | 277     | 0.07  | 0.08  | 0.06  |
| Trinidad and Tobago                                  | 213.76  | 210.7   | 216.83  | 282.79  | 278.04   | 287.67  | 0.31  | 0.31  | 0.31  |
| Tunisia                                              | 219.98  | 213.83  | 226.05  | 325.09  | 331.5    | 318.54  | 0.46  | 0.53  | 0.39  |
| Turkey                                               | 198.35  | 209.99  | 186.42  | 239.6   | 263.49   | 214.87  | 0.20  | 0.25  | 0.15  |
| Turkmenistan                                         | 302.22  | 337.17  | 266.29  | 365.1   | 386.68   | 342.79  | 0.20  | 0.14  | 0.28  |
| Uganda                                               | 168.63  | 181.57  | 155.53  | 147.76  | 160.38   | 135.13  | -0.11 | -0.11 | -0.11 |
| Ukraine                                              | 814.45  | 958.73  | 646.56  | 909.43  | 1,037.28 | 758.42  | 0.11  | 0.08  | 0.17  |
| United Arab Emirates                                 | 163.52  | 153.01  | 168.98  | 183.81  | 158.17   | 193.15  | 0.11  | 0.02  | 0.13  |
| United Kingdom                                       | 573.47  | 607.74  | 537.23  | 650.1   | 635.41   | 665.17  | 0.13  | 0.04  | 0.23  |
| United States                                        | 309.02  | 318.25  | 299.32  | 318.97  | 312.6    | 325.56  | 0.02  | -0.02 | 0.07  |
| Uruguay                                              | 398.26  | 401.56  | 394.76  | 410.05  | 435.06   | 383.25  | 0.02  | 0.08  | -0.04 |
| Uzbekistan                                           | 262.09  | 291.22  | 232.32  | 296.73  | 314.72   | 278.16  | 0.12  | 0.07  | 0.19  |
| Vanuatu                                              | 333.9   | 286.26  | 378.94  | 354.32  | 334.01   | 374.12  | 0.03  | 0.14  | -0.05 |
| Venezuela                                            | 80.46   | 81.79   | 79.15   | 109.09  | 111.62   | 106.55  | 0.34  | 0.35  | 0.33  |
| Vietnam                                              | 315.87  | 301.07  | 331.12  | 332.32  | 324.86   | 339.95  | 0.08  | 0.10  | 0.06  |
| Virgin Islands, U.S.                                 | 192.23  | 186.41  | 198.39  | 387     | 377.89   | 397.02  | 0.99  | 1.00  | 0.98  |
| Yemen                                                | 145.88  | 159.45  | 132.06  | 182.95  | 197.14   | 169.06  | 0.25  | 0.23  | 0.28  |
| Zambia                                               | 173.56  | 190.3   | 156.55  | 211.5   | 230.2    | 192.75  | 0.23  | 0.22  | 0.25  |
| Zimbabwe                                             | 145.91  | 153.62  | 138.13  | 109.71  | 124.9    | 94.08   | -0.25 | -0.19 | -0.32 |
| <b>Other cardiovascular and circulatory diseases</b> |         |         |         |         |          |         |       |       |       |
| Afghanistan                                          | 731.42  | 553.09  | 901.19  | 823.67  | 640.16   | 995.98  | 0.13  | 0.16  | 0.11  |
| Albania                                              | 1580.12 | 1384.1  | 1766.81 | 3077.36 | 2794.24  | 3365.05 | 0.93  | 1.00  | 0.90  |
| Algeria                                              | 1269.44 | 1352.33 | 1188.57 | 1619.45 | 1811.96  | 1429.59 | 0.26  | 0.32  | 0.18  |
| American Samoa                                       | 677.9   | 354.93  | 983.62  | 711.51  | 369.41   | 1051.84 | 0.05  | 0.04  | 0.07  |
| Andorra                                              | 1624.82 | 1714.77 | 1529.98 | 1767.58 | 1814.26  | 1718.95 | 0.08  | 0.05  | 0.11  |
| Angola                                               | 705.97  | 728.96  | 682.42  | 691.39  | 703.46   | 679.15  | -0.01 | -0.03 | 0.00  |
| Antigua and Barbuda                                  | 1435.5  | 1082.97 | 1812.56 | 1586.52 | 1242.26  | 1961.94 | 0.10  | 0.14  | 0.08  |
| Argentina                                            | 969.59  | 1173.79 | 757.34  | 1072.29 | 1288.61  | 846.55  | 0.10  | 0.09  | 0.12  |
| Armenia                                              | 113.57  | 134.73  | 91.14   | 202.44  | 234.07   | 166.01  | 0.76  | 0.71  | 0.79  |
| Australia                                            | 1018.81 | 1091.47 | 945.75  | 1209.8  | 1251.79  | 1167.7  | 0.18  | 0.14  | 0.23  |
| Austria                                              | 1377.44 | 1613.49 | 1120.23 | 1575.95 | 1710.64  | 1434.58 | 0.13  | 0.06  | 0.26  |
| Azerbaijan                                           | 137.68  | 134.85  | 140.63  | 222.58  | 205.73   | 239.63  | 0.60  | 0.51  | 0.69  |
| Bahrain                                              | 687.51  | 543.15  | 793.67  | 647.86  | 634.29   | 656.17  | -0.06 | 0.16  | -0.18 |
| Bangladesh                                           | 60.87   | 45.5    | 75.56   | 103.58  | 77.23    | 129.43  | 0.72  | 0.71  | 0.74  |

|                                  |         |          |         |         |         |          |       |       |       |
|----------------------------------|---------|----------|---------|---------|---------|----------|-------|-------|-------|
| Barbados                         | 1327.27 | 1267.32  | 1391.87 | 1847.5  | 1745.89 | 1957.94  | 0.38  | 0.37  | 0.39  |
| Belarus                          | 111.87  | 144.11   | 75.36   | 141.38  | 181.61  | 94.73    | 0.25  | 0.25  | 0.24  |
| Belgium                          | 1852.2  | 1901.66  | 1800.44 | 1816.31 | 1829.58 | 1802.53  | -0.03 | -0.04 | -0.01 |
| Belize                           | 1127.83 | 769.12   | 1480.52 | 1161.66 | 851.93  | 1473.24  | 0.03  | 0.11  | 0.00  |
| Benin                            | 2308.46 | 2833.62  | 1749.71 | 2231.24 | 2703.04 | 1757.6   | -0.03 | -0.04 | 0.02  |
| Bermuda                          | 1546.13 | 1299.16  | 1796.23 | 1808.44 | 1668.45 | 1951.1   | 0.16  | 0.28  | 0.08  |
| Bhutan                           | 75.93   | 56.12    | 94.34   | 122.18  | 89.23   | 150.54   | 0.59  | 0.57  | 0.58  |
| Bolivia                          | 726.29  | 486.11   | 964.82  | 940.49  | 601.03  | 1278.7   | 0.27  | 0.22  | 0.30  |
| Bosnia and Herzegovina           | 1240.88 | 1012.66  | 1469.35 | 2234.73 | 1780.14 | 2693.53  | 0.78  | 0.74  | 0.81  |
| Botswana                         | 412.98  | 658.07   | 162.07  | 638.94  | 1020.57 | 256.95   | 0.54  | 0.54  | 0.58  |
| Brazil                           | 1953.66 | 1643.92  | 2268.29 | 2131.36 | 1831.64 | 2441.09  | 0.08  | 0.10  | 0.07  |
| Brunei                           | 275.3   | 223.68   | 321.51  | 371.98  | 324.85  | 416.33   | 0.31  | 0.40  | 0.26  |
| Bulgaria                         | 2568.08 | 2086.17  | 3063.56 | 3230.23 | 2875.04 | 3,602.99 | 0.25  | 0.37  | 0.17  |
| Burkina Faso                     | 2229.36 | 2770.73  | 1662.77 | 2033.41 | 2507.34 | 1553.32  | -0.08 | -0.09 | -0.06 |
| Burundi                          | 993.91  | 1,233.82 | 745.59  | 909.36  | 1060.75 | 754.67   | -0.05 | -0.12 | 0.05  |
| Cambodia                         | 890.14  | 610.01   | 1190.27 | 973.77  | 795.02  | 1161.48  | 0.12  | 0.32  | 0.01  |
| Cameroon                         | 2583.48 | 2820.7   | 2343.27 | 2538.91 | 2659.15 | 2418.73  | 0.00  | -0.05 | 0.05  |
| Canada                           | 1165.08 | 1386.15  | 940.21  | 1371.45 | 1522.17 | 1218.6   | 0.16  | 0.09  | 0.27  |
| Cape Verde                       | 4250.1  | 4624.99  | 3835.53 | 4775.14 | 5616.57 | 3911.17  | 0.12  | 0.21  | 0.02  |
| Central African Republic         | 1012.68 | 1226.89  | 791.21  | 971.59  | 1158.84 | 779.34   | -0.04 | -0.05 | -0.01 |
| Chad                             | 1932.02 | 2383.39  | 1474.08 | 1807.01 | 2123.04 | 1491.73  | -0.06 | -0.11 | 0.02  |
| Chile                            | 338.36  | 382.36   | 293.18  | 610.06  | 666.69  | 551.91   | 0.77  | 0.72  | 0.85  |
| China                            | 1161.5  | 881.94   | 1426.7  | 1655.84 | 1492.03 | 1810.14  | 0.45  | 0.71  | 0.30  |
| Colombia                         | 1286.24 | 1317.4   | 1254.69 | 2221.15 | 2383.97 | 2053.3   | 0.71  | 0.80  | 0.62  |
| Comoros                          | 1173.11 | 1492.65  | 855.61  | 1154.5  | 1444.53 | 869.7    | -0.01 | -0.03 | 0.02  |
| Congo                            | 1018.74 | 1243.37  | 792.94  | 1018.77 | 1223.29 | 814.56   | 0.00  | -0.01 | 0.03  |
| Costa Rica                       | 1060.91 | 1035.34  | 1086.07 | 1651.72 | 1637.84 | 1665.59  | 0.54  | 0.56  | 0.51  |
| Cote d'Ivoire                    | 1959.56 | 2276.11  | 1667.89 | 2258.99 | 2487.21 | 2038.54  | 0.16  | 0.10  | 0.24  |
| Croatia                          | 2701.25 | 2529.22  | 2884.05 | 3782.54 | 3511.69 | 4073.23  | 0.39  | 0.38  | 0.40  |
| Cuba                             | 668.08  | 521.06   | 812.88  | 1034.32 | 844.52  | 1222.32  | 0.53  | 0.61  | 0.49  |
| Cyprus                           | 1693.67 | 1801.06  | 1583.55 | 1672.23 | 1778.91 | 1558.19  | -0.03 | -0.03 | -0.04 |
| Czech Republic                   | 2093.13 | 2218.66  | 1960.07 | 3116.75 | 3222.62 | 3007.48  | 0.48  | 0.44  | 0.52  |
| Democratic Republic of the Congo | 875.57  | 1085.5   | 660.45  | 794.35  | 934.34  | 653.64   | -0.09 | -0.14 | -0.01 |
| Denmark                          | 1580.88 | 1524.31  | 1639.1  | 1615.31 | 1475.6  | 1757.25  | 0.02  | -0.03 | 0.06  |
| Djibouti                         | 1157.92 | 1427.66  | 891.35  | 1589.95 | 2029.57 | 1154.23  | 0.37  | 0.42  | 0.29  |
| Dominica                         | 884.41  | 745.81   | 1024.04 | 1119.79 | 988.82  | 1252.84  | 0.27  | 0.33  | 0.24  |
| Dominican Republic               | 1351.81 | 871.3    | 1825.93 | 1430.91 | 1039.19 | 1825.22  | 0.05  | 0.18  | 0.00  |
| Ecuador                          | 606.29  | 403.56   | 806.78  | 756.23  | 540.61  | 971.9    | 0.25  | 0.34  | 0.21  |
| Egypt                            | 1747.55 | 1568.59  | 1925.28 | 1827.74 | 1656.93 | 1995.03  | 0.05  | 0.05  | 0.04  |
| El Salvador                      | 1215.46 | 1146.52  | 1287.66 | 1550.1  | 1569.53 | 1528.14  | 0.28  | 0.37  | 0.20  |
| Equatorial Guinea                | 1175.57 | 1471.47  | 892.46  | 1138.48 | 1311.22 | 974.19   | -0.03 | -0.11 | 0.09  |
| Eritrea                          | 692.15  | 837      | 545.48  | 879.66  | 1107.96 | 652.19   | 0.28  | 0.33  | 0.20  |
| Estonia                          | 397.78  | 401.78   | 393.22  | 549.46  | 553.54  | 544.67   | 0.37  | 0.37  | 0.37  |
| Ethiopia                         | 728.98  | 961.82   | 494.67  | 832.69  | 1124.59 | 539.81   | 0.15  | 0.18  | 0.10  |
| Federated States of Micronesia   | 943.89  | 561.25   | 1310.17 | 950.92  | 671.26  | 1217.28  | 0.00  | 0.19  | -0.08 |
| Fiji                             | 768.26  | 615.58   | 916.21  | 990.82  | 942.26  | 1037.76  | 0.28  | 0.52  | 0.12  |
| Finland                          | 1078.02 | 1213.66  | 934.13  | 1431.9  | 1518.66 | 1342.47  | 0.31  | 0.24  | 0.41  |
| France                           | 2632.56 | 2501.44  | 2770.82 | 2805.71 | 2559.69 | 3067.66  | 0.06  | 0.02  | 0.10  |
| Gabon                            | 1662.89 | 2168.95  | 1135.72 | 1445.86 | 1814.01 | 1086     | -0.13 | -0.16 | -0.04 |
| Georgia                          | 501     | 419.81   | 590.54  | 678.06  | 564.03  | 802.8    | 0.34  | 0.34  | 0.35  |
| Germany                          | 1666.06 | 1864.88  | 1452.46 | 1909.1  | 1961.91 | 1854.49  | 0.13  | 0.05  | 0.26  |
| Ghana                            | 2046.77 | 2048.54  | 2045.05 | 2466.69 | 2541.1  | 2391.52  | 0.22  | 0.25  | 0.19  |
| Greece                           | 918.96  | 874.15   | 964.91  | 1020.44 | 1022.77 | 1018     | 0.10  | 0.16  | 0.04  |
| Greenland                        | 1540.61 | 1265.63  | 1778.59 | 2258.4  | 1676.51 | 2762.92  | 0.44  | 0.31  | 0.51  |
| Grenada                          | 978.81  | 706.58   | 1258.18 | 1005.09 | 750.44  | 1258.16  | 0.04  | 0.07  | 0.02  |
| Guam                             | 610.81  | 578.33   | 639.18  | 788.8   | 794.95  | 782.82   | 0.30  | 0.38  | 0.24  |
| Guatemala                        | 652.91  | 502.46   | 805.52  | 767.39  | 623.29  | 917.79   | 0.20  | 0.26  | 0.17  |
| Guinea                           | 3021.01 | 3059.12  | 2982.04 | 3038.65 | 2981.51 | 3095.53  | 0.01  | -0.02 | 0.04  |
| Guinea-Bissau                    | 2382.07 | 2813.12  | 1940.61 | 2405.7  | 2788.63 | 2017.98  | 0.02  | 0.00  | 0.05  |
| Guyana                           | 561.04  | 388.98   | 738.68  | 705.3   | 538.14  | 870.86   | 0.26  | 0.38  | 0.19  |
| Haiti                            | 928.82  | 583.29   | 1284.52 | 920.42  | 623.47  | 1223.86  | 0.02  | 0.09  | -0.01 |

|                          |           |          |           |           |          |           |       |       |       |
|--------------------------|-----------|----------|-----------|-----------|----------|-----------|-------|-------|-------|
| Honduras                 | 725.22    | 601.09   | 848.48    | 750.88    | 639.64   | 862.13    | 0.04  | 0.06  | 0.02  |
| Hungary                  | 1117.62   | 1110.33  | 1125.51   | 1620.03   | 1644.16  | 1593.42   | 0.44  | 0.47  | 0.41  |
| Iceland                  | 1194.97   | 1160.27  | 1229.37   | 1243.3    | 1190.48  | 1297.26   | 0.03  | 0.02  | 0.04  |
| India                    | 19.67     | 17.94    | 21.29     | 32.2      | 30.19    | 34.08     | 0.64  | 0.68  | 0.60  |
| Indonesia                | 671.24    | 558.76   | 782.76    | 862.45    | 764.65   | 958.84    | 0.30  | 0.38  | 0.25  |
| Iran                     | 5,985.76  | 3,723.63 | 8,165.73  | 4837.16   | 3584.34  | 6071.26   | -0.21 | -0.06 | -0.27 |
| Iraq                     | 1400.41   | 1185.26  | 1611.65   | 1328      | 1183.71  | 1468.72   | -0.05 | 0.00  | -0.09 |
| Ireland                  | 762.26    | 777.5    | 746.88    | 793.33    | 787.2    | 799.64    | 0.03  | 0.00  | 0.06  |
| Israel                   | 563.43    | 512.1    | 614.95    | 617.17    | 591.65   | 643.12    | 0.09  | 0.15  | 0.04  |
| Italy                    | 995.57    | 1031.75  | 957.18    | 1109.9    | 1096.1   | 1124.58   | 0.10  | 0.06  | 0.16  |
| Jamaica                  | 1350.61   | 1028.31  | 1681.15   | 1591.07   | 1253.25  | 1931.57   | 0.17  | 0.21  | 0.14  |
| Japan                    | 1268.16   | 1146.83  | 1393.86   | 1754.01   | 1616.06  | 1899.3    | 0.35  | 0.39  | 0.33  |
| Jordan                   | 1246.53   | 1311.24  | 1187.97   | 1250.02   | 1435.22  | 1073.76   | -0.01 | 0.08  | -0.11 |
| Kazakhstan               | 503.13    | 343.87   | 672.37    | 646.27    | 429.33   | 878.73    | 0.28  | 0.25  | 0.31  |
| Kenya                    | 408.68    | 565.16   | 251.1     | 507.55    | 750.77   | 264.38    | 0.25  | 0.33  | 0.06  |
| Kiribati                 | 869.01    | 549.33   | 1195.37   | 953.41    | 654.53   | 1259.97   | 0.10  | 0.19  | 0.06  |
| Kuwait                   | 733.05    | 751.78   | 716.66    | 760.49    | 895.64   | 655.01    | 0.02  | 0.17  | -0.10 |
| Kyrgyzstan               | 222.99    | 220.66   | 225.42    | 240.59    | 229.48   | 251.95    | 0.08  | 0.04  | 0.12  |
| Laos                     | 861.65    | 600.48   | 1123.18   | 846.14    | 628.09   | 1066.37   | 0.00  | 0.06  | -0.03 |
| Latvia                   | 248.87    | 294.62   | 196.17    | 340.71    | 398.93   | 272.91    | 0.35  | 0.34  | 0.37  |
| Lebanon                  | 1423.97   | 1454.85  | 1392.24   | 1567.15   | 1718.89  | 1416.95   | 0.09  | 0.17  | 0.01  |
| Lesotho                  | 667.89    | 1036.48  | 277.57    | 710.94    | 1147.76  | 265.26    | 0.06  | 0.11  | -0.05 |
| Liberia                  | 2089.1    | 2495.28  | 1680.64   | 2212.74   | 2652.66  | 1779.93   | 0.06  | 0.07  | 0.07  |
| Libya                    | 1776.08   | 1452.46  | 2065.9    | 1688.63   | 1558.5   | 1817.23   | -0.06 | 0.06  | -0.13 |
| Lithuania                | 498.85    | 537.75   | 455.56    | 780.04    | 842.66   | 707.21    | 0.54  | 0.55  | 0.53  |
| Luxembourg               | 3169.19   | 3037.71  | 3306.04   | 2664.7    | 2497.81  | 2832.25   | -0.16 | -0.18 | -0.15 |
| Macedonia                | 1935.54   | 1482.35  | 2383.42   | 2759.45   | 2253.49  | 3269.86   | 0.41  | 0.50  | 0.36  |
| Madagascar               | 1215.06   | 1335.47  | 1,094.26  | 1195.06   | 1391.4   | 997.5     | 0.00  | 0.05  | -0.07 |
| Malawi                   | 1037.53   | 1269.12  | 797.79    | 1155.83   | 1450.96  | 859.62    | 0.13  | 0.16  | 0.10  |
| Malaysia                 | 2204.43   | 1991.36  | 2411.21   | 2520.03   | 2621.96  | 2416.2    | 0.14  | 0.31  | 0.00  |
| Maldives                 | 2569.85   | 1530.47  | 3556.91   | 2758.37   | 1989.16  | 3523.33   | 0.07  | 0.29  | -0.01 |
| Mali                     | 2179.77   | 2651.47  | 1697.82   | 1885.19   | 2235.87  | 1541.46   | -0.12 | -0.15 | -0.07 |
| Malta                    | 909.18    | 808.92   | 1013.02   | 1209.97   | 1090.64  | 1330.26   | 0.30  | 0.33  | 0.28  |
| Marshall Islands         | 801.49    | 602.58   | 991.71    | 870.02    | 719.59   | 1015.28   | 0.08  | 0.19  | 0.02  |
| Mauritania               | 2064.19   | 2488.34  | 1637.49   | 2387.74   | 2875.54  | 1906.68   | 0.16  | 0.16  | 0.17  |
| Mauritius                | 485.14    | 475.27   | 495.06    | 741.59    | 795.57   | 686.29    | 0.51  | 0.66  | 0.36  |
| Mexico                   | 836.23    | 647.66   | 1026.77   | 1073.77   | 883.92   | 1265.55   | 0.28  | 0.36  | 0.22  |
| Moldova                  | 223.95    | 179.07   | 273.19    | 300.64    | 237.91   | 368.45    | 0.32  | 0.31  | 0.33  |
| Mongolia                 | 349.15    | 196.25   | 505.68    | 400.1     | 236.64   | 566.87    | 0.14  | 0.20  | 0.11  |
| Montenegro               | 2066.92   | 1786.48  | 2349.81   | 2484.38   | 2184.83  | 2791.05   | 0.19  | 0.21  | 0.17  |
| Morocco                  | 3222.66   | 2243.9   | 4,205.23  | 3641.54   | 2890.02  | 4410.61   | 0.12  | 0.28  | 0.04  |
| Mozambique               | 2940.69   | 2813.52  | 3079.33   | 2953.75   | 2903.07  | 3006.77   | 0.01  | 0.04  | -0.02 |
| Myanmar                  | 938.82    | 700.4    | 1186.94   | 1153.42   | 1034.07  | 1278.24   | 0.26  | 0.50  | 0.11  |
| Namibia                  | 584.96    | 915.86   | 239.67    | 638.53    | 1005.65  | 251.79    | 0.09  | 0.10  | 0.05  |
| Nepal                    | 46.85     | 35.97    | 57.9      | 71.83     | 50.22    | 94.8      | 0.55  | 0.40  | 0.66  |
| Netherlands              | 1519.4    | 1772.85  | 1260.2    | 1915.43   | 2005.31  | 1824.04   | 0.25  | 0.13  | 0.43  |
| New Zealand              | 647.44    | 668.96   | 625.26    | 780.15    | 751.57   | 809.81    | 0.19  | 0.11  | 0.27  |
| Nicaragua                | 777.5     | 762.78   | 792.44    | 1104.33   | 1121.72  | 1086.45   | 0.43  | 0.48  | 0.39  |
| Niger                    | 1750.61   | 2109.55  | 1379.57   | 1822.38   | 2113.17  | 1536.31   | 0.05  | 0.01  | 0.13  |
| Nigeria                  | 1999.22   | 2536.02  | 1473.17   | 2094.28   | 2553.6   | 1652.03   | 0.05  | 0.01  | 0.12  |
| North Korea              | 1126.58   | 1186.44  | 1063.2    | 1400.55   | 1639.77  | 1150.56   | 0.25  | 0.39  | 0.09  |
| Northern Mariana Islands | 876.82    | 636.15   | 1093.13   | 885.89    | 632.21   | 1141.38   | 0.03  | 0.00  | 0.07  |
| Norway                   | 1578.68   | 1529.99  | 1628.46   | 1366.54   | 1276.19  | 1455.85   | -0.14 | -0.17 | -0.12 |
| Oman                     | 14,355.49 | 9,232.59 | 18,442.27 | 11,031.67 | 8,207.19 | 12,463.87 | -0.23 | -0.12 | -0.33 |
| Pakistan                 | 57.95     | 36.46    | 77.89     | 73.11     | 50.93    | 94.11     | 0.27  | 0.40  | 0.21  |
| Palestine                | 726.34    | 743.75   | 709.35    | 736.29    | 800.47   | 673.9     | 0.00  | 0.07  | -0.06 |
| Panama                   | 774.8     | 710.2    | 837.99    | 1257.47   | 1197.88  | 1316.73   | 0.65  | 0.71  | 0.61  |
| Papua New Guinea         | 1050.62   | 650.16   | 1432.85   | 1095.17   | 729.57   | 1446.44   | 0.04  | 0.12  | 0.01  |
| Paraguay                 | 1473.39   | 1054.68  | 1882.58   | 1537.94   | 1186.31  | 1878.99   | 0.03  | 0.12  | -0.01 |
| Peru                     | 841.91    | 512.41   | 1171.5    | 1082.73   | 735.89   | 1430.06   | 0.29  | 0.44  | 0.22  |
| Philippines              | 129.83    | 117.86   | 141.56    | 151.75    | 150.18   | 153.28    | 0.18  | 0.28  | 0.09  |

|                                  |         |          |         |         |         |         |       |       |       |
|----------------------------------|---------|----------|---------|---------|---------|---------|-------|-------|-------|
| Poland                           | 1177.99 | 1033.3   | 1330.16 | 1860.37 | 1658.98 | 2077.11 | 0.56  | 0.59  | 0.55  |
| Portugal                         | 1374.49 | 1288.28  | 1467.21 | 1441.17 | 1415.87 | 1468.15 | 0.03  | 0.09  | -0.02 |
| Puerto Rico                      | 1315.11 | 1211.15  | 1425.64 | 1598.75 | 1599.22 | 1598.24 | 0.21  | 0.31  | 0.11  |
| Qatar                            | 1224.2  | 956.6    | 1356.31 | 1151.5  | 987.96  | 1212.65 | -0.07 | 0.01  | -0.12 |
| Romania                          | 863.49  | 597.96   | 1136.65 | 1380.22 | 1001.01 | 1783.83 | 0.59  | 0.66  | 0.56  |
| Russia                           | 368.13  | 416.75   | 312.92  | 474.77  | 518.75  | 423.13  | 0.28  | 0.24  | 0.34  |
| Rwanda                           | 921.73  | 1101.6   | 735.5   | 1097.94 | 1378.18 | 793.11  | 0.20  | 0.26  | 0.09  |
| Saint Lucia                      | 1057.63 | 820.76   | 1301.58 | 1350.51 | 1113.1  | 1597.02 | 0.29  | 0.37  | 0.25  |
| Saint Vincent and the Grenadines | 1206.14 | 941.62   | 1473.3  | 1456.48 | 1167.93 | 1739.73 | 0.21  | 0.24  | 0.19  |
| Samoa                            | 943.26  | 657.17   | 1206.97 | 1019.72 | 763.4   | 1260.41 | 0.07  | 0.16  | 0.04  |
| Sao Tome and Principe            | 3156.34 | 3,904.67 | 2394.17 | 2683.14 | 3244.65 | 2117.37 | -0.15 | -0.17 | -0.11 |
| Saudi Arabia                     | 1329.47 | 1117.36  | 1496.31 | 1553.69 | 1451.21 | 1632.43 | 0.15  | 0.28  | 0.07  |
| Senegal                          | 1116.38 | 1854.39  | 371.4   | 1250.57 | 2025.04 | 447.73  | 0.13  | 0.10  | 0.22  |
| Serbia                           | 1522.1  | 1350.21  | 1698.61 | 2157.78 | 1944.35 | 2381.63 | 0.40  | 0.43  | 0.39  |
| Seychelles                       | 1500.44 | 1144.26  | 1858.15 | 1577.17 | 1294.27 | 1852.57 | 0.05  | 0.13  | -0.01 |
| Sierra Leone                     | 2353.46 | 2740.07  | 1958.84 | 2234.85 | 2525.58 | 1938.16 | -0.03 | -0.06 | 0.02  |
| Singapore                        | 275.15  | 349.44   | 202.79  | 470.26  | 598.19  | 337.76  | 0.67  | 0.68  | 0.63  |
| Slovakia                         | 1978.2  | 1858.95  | 2103.09 | 2791.61 | 2701.06 | 2887.17 | 0.39  | 0.44  | 0.36  |
| Slovenia                         | 1560.81 | 1618.22  | 1499.95 | 2590.8  | 2523.85 | 2658.96 | 0.64  | 0.54  | 0.74  |
| Solomon Islands                  | 853.32  | 441.48   | 1243.28 | 872.77  | 487.33  | 1246.3  | 0.02  | 0.10  | 0.00  |
| Somalia                          | 1068.78 | 1334.43  | 798.38  | 973.99  | 1179.98 | 766.1   | -0.09 | -0.11 | -0.04 |
| South Africa                     | 1066.26 | 1362.5   | 763.12  | 1496.81 | 2009.69 | 965.81  | 0.40  | 0.47  | 0.26  |
| South Korea                      | 801.48  | 837.69   | 765.43  | 1038.22 | 1126.74 | 948.64  | 0.26  | 0.31  | 0.20  |
| South Sudan                      | 1130.23 | 1343.03  | 915.43  | 1235.89 | 1495.54 | 977.01  | 0.10  | 0.12  | 0.07  |
| Spain                            | 1997.91 | 1816.29  | 2187.14 | 1969.08 | 1818.11 | 2123.95 | -0.02 | -0.01 | -0.04 |
| Sri Lanka                        | 2183.35 | 1521.45  | 2832.5  | 2392.06 | 1926.69 | 2892.31 | 0.11  | 0.28  | 0.04  |
| Sudan                            | 2124.57 | 1385.36  | 2857.99 | 2101.45 | 1460.66 | 2737.54 | -0.01 | 0.06  | -0.04 |
| Suriname                         | 874     | 649.25   | 1091.57 | 1049.88 | 842.87  | 1256.12 | 0.20  | 0.29  | 0.15  |
| Swaziland                        | 437.64  | 656.98   | 192.34  | 589.04  | 926.68  | 244.28  | 0.34  | 0.41  | 0.26  |
| Sweden                           | 1602.25 | 1462.32  | 1745.57 | 1509.3  | 1395.67 | 1623.15 | -0.07 | -0.05 | -0.09 |
| Switzerland                      | 2770.92 | 2712.43  | 2832.17 | 2792.73 | 2623.48 | 2965.78 | 0.00  | -0.04 | 0.04  |
| Syria                            | 886.21  | 635.1    | 1129.27 | 766.05  | 622.23  | 906.37  | -0.14 | -0.03 | -0.20 |
| Taiwan                           | 1255.63 | 1366.19  | 1152.99 | 2162.91 | 2747.35 | 1576.51 | 0.76  | 1.03  | 0.41  |
| Tajikistan                       | 24.31   | 18.88    | 29.81   | 29.28   | 20.92   | 37.45   | 0.20  | 0.11  | 0.25  |
| Tanzania                         | 1101.84 | 1334.19  | 865.35  | 1188.53 | 1402.16 | 972.28  | 0.10  | 0.07  | 0.15  |
| Thailand                         | 2054.65 | 1742.01  | 2373.04 | 2518.8  | 2523.57 | 2513.9  | 0.22  | 0.44  | 0.06  |
| The Bahamas                      | 780.08  | 698.27   | 863.02  | 1038.97 | 991.88  | 1088.08 | 0.32  | 0.40  | 0.25  |
| The Gambia                       | 2065.83 | 2106.39  | 2025.84 | 2160.42 | 2219.84 | 2099.83 | 0.05  | 0.05  | 0.04  |
| Timor-Leste                      | 738.8   | 517.72   | 954.31  | 841     | 650.71  | 1025.4  | 0.15  | 0.27  | 0.08  |
| Togo                             | 2052.79 | 2490.64  | 1603.59 | 2181.72 | 2615.23 | 1737.97 | 0.07  | 0.06  | 0.10  |
| Tonga                            | 353.71  | 201.96   | 501.77  | 392.4   | 248.93  | 535.1   | 0.11  | 0.23  | 0.06  |
| Trinidad and Tobago              | 488.57  | 448.13   | 529.31  | 690.03  | 677.09  | 703.31  | 0.40  | 0.49  | 0.32  |
| Tunisia                          | 2096.49 | 2016     | 2176    | 2433.65 | 2630.63 | 2232.04 | 0.15  | 0.29  | 0.01  |
| Turkey                           | 2438.61 | 2264.52  | 2616.98 | 2967.89 | 3159.72 | 2769.27 | 0.21  | 0.38  | 0.05  |
| Turkmenistan                     | 70.84   | 71.24    | 70.42   | 86.7    | 85.43   | 88.02   | 0.21  | 0.19  | 0.24  |
| Uganda                           | 662.21  | 896.15   | 425.21  | 671.17  | 889.09  | 453.04  | 0.03  | 0.00  | 0.09  |
| Ukraine                          | 103.67  | 123.11   | 81.06   | 128.5   | 151.61  | 101.22  | 0.23  | 0.22  | 0.24  |
| United Arab Emirates             | 309.27  | 288.97   | 319.81  | 367.36  | 362.68  | 369.06  | 0.17  | 0.24  | 0.14  |
| United Kingdom                   | 1109.18 | 1149.58  | 1066.45 | 1164.34 | 1148.6  | 1180.48 | 0.05  | 0.00  | 0.10  |
| United States                    | 1849.28 | 1928.89  | 1765.56 | 1984.18 | 1982.38 | 1986.04 | 0.07  | 0.03  | 0.11  |
| Uruguay                          | 1386.54 | 1363.11  | 1411.41 | 1508.36 | 1526.13 | 1489.33 | 0.08  | 0.11  | 0.05  |
| Uzbekistan                       | 48.96   | 35.13    | 63.1    | 67.25   | 46.98   | 88.19   | 0.36  | 0.33  | 0.39  |
| Vanuatu                          | 817.65  | 377.48   | 1233.87 | 872.36  | 473.29  | 1261.54 | 0.03  | 0.22  | -0.02 |
| Venezuela                        | 400.52  | 459.25   | 342.7   | 864.26  | 942.13  | 785.72  | 1.13  | 1.03  | 1.26  |
| Vietnam                          | 860.22  | 879.48   | 840.36  | 1249.47 | 1381.01 | 1115.1  | 0.49  | 0.59  | 0.37  |
| Virgin Islands, U.S.             | 1226.54 | 1038.55  | 1425.67 | 2105.72 | 1778.91 | 2464.93 | 0.70  | 0.69  | 0.71  |
| Yemen                            | 1422.45 | 1013.28  | 1839.13 | 1259.57 | 948.33  | 1564.41 | -0.12 | -0.07 | -0.15 |
| Zambia                           | 993.68  | 1208.54  | 775.19  | 1047.57 | 1289.43 | 805.04  | 0.07  | 0.08  | 0.05  |
| Zimbabwe                         | 507.61  | 729.02   | 284.34  | 599.9   | 855.27  | 337.04  | 0.18  | 0.17  | 0.19  |
| <b>Peripheral artery disease</b> |         |          |         |         |         |         |       |       |       |
| Afghanistan                      | 653.96  | 645.14   | 662.36  | 756.16  | 761.2   | 751.42  | 0.16  | 0.18  | 0.14  |

|                                  |         |         |         |         |         |         |       |       |       |
|----------------------------------|---------|---------|---------|---------|---------|---------|-------|-------|-------|
| Albania                          | 1591.44 | 1653.79 | 1532.06 | 3412.93 | 3484.08 | 3340.63 | 1.13  | 1.09  | 1.17  |
| Algeria                          | 1011.8  | 1028.41 | 995.6   | 1897.16 | 1869.53 | 1924.41 | 0.85  | 0.79  | 0.90  |
| American Samoa                   | 787.15  | 787.74  | 786.59  | 861     | 934.88  | 787.49  | 0.09  | 0.18  | 0.00  |
| Andorra                          | 3256.32 | 3704.63 | 2783.63 | 4190.56 | 4603.82 | 3759.97 | 0.28  | 0.24  | 0.33  |
| Angola                           | 775.66  | 818.05  | 732.21  | 765.7   | 801.21  | 729.73  | 0.00  | -0.01 | 0.01  |
| Antigua and Barbuda              | 2211.16 | 2360.63 | 2051.28 | 2389.93 | 2445.49 | 2329.34 | 0.08  | 0.03  | 0.13  |
| Argentina                        | 1667.25 | 1757.06 | 1573.89 | 1944.88 | 2152.12 | 1728.62 | 0.16  | 0.22  | 0.10  |
| Armenia                          | 1863.27 | 2060.54 | 1654.19 | 3601.6  | 3914.45 | 3241.26 | 0.90  | 0.87  | 0.93  |
| Australia                        | 2414.7  | 2346.29 | 2483.48 | 2957.49 | 2790.19 | 3125.22 | 0.22  | 0.18  | 0.25  |
| Austria                          | 3436.01 | 4034.54 | 2783.87 | 4226.71 | 4622.53 | 3811.25 | 0.22  | 0.14  | 0.35  |
| Azerbaijan                       | 1409.23 | 1612.68 | 1196.94 | 2189.67 | 2346.78 | 2030.71 | 0.54  | 0.44  | 0.68  |
| Bahrain                          | 934.06  | 900.66  | 958.62  | 1299.65 | 1356.46 | 1264.86 | 0.38  | 0.50  | 0.31  |
| Bangladesh                       | 846.91  | 814.35  | 878.02  | 1272.73 | 1257.57 | 1287.6  | 0.52  | 0.55  | 0.49  |
| Barbados                         | 2801.73 | 3118.93 | 2459.92 | 4221.58 | 4392.2  | 4036.15 | 0.49  | 0.40  | 0.62  |
| Belarus                          | 3076.33 | 3711.6  | 2356.8  | 4431.54 | 5336.07 | 3382.27 | 0.43  | 0.43  | 0.42  |
| Belgium                          | 3347.64 | 3771.9  | 2903.71 | 4023.36 | 4406.49 | 3625.13 | 0.19  | 0.16  | 0.23  |
| Belize                           | 1177.56 | 1159.56 | 1195.25 | 1280.94 | 1205.16 | 1357.18 | 0.09  | 0.04  | 0.15  |
| Benin                            | 1129.77 | 1207.41 | 1047.17 | 1100.91 | 1129.25 | 1072.45 | -0.02 | -0.06 | 0.04  |
| Bermuda                          | 2129.07 | 2111.03 | 2147.33 | 3068.38 | 3105.75 | 3030.3  | 0.43  | 0.46  | 0.40  |
| Bhutan                           | 930.29  | 884.88  | 972.49  | 1455.03 | 1374.02 | 1524.76 | 0.55  | 0.53  | 0.55  |
| Bolivia                          | 1655.28 | 1673.97 | 1636.72 | 2418.91 | 2423.88 | 2413.96 | 0.44  | 0.42  | 0.45  |
| Bosnia and Herzegovina           | 2256.86 | 2551.76 | 1961.64 | 4962.2  | 5382.14 | 4538.38 | 1.17  | 1.09  | 1.28  |
| Botswana                         | 1211.7  | 1345.91 | 1074.31 | 1700.78 | 1753.57 | 1647.95 | 0.40  | 0.30  | 0.52  |
| Brazil                           | 1942.58 | 2068.57 | 1814.6  | 3644.06 | 3885.22 | 3394.84 | 0.86  | 0.86  | 0.85  |
| Brunei                           | 551.54  | 566.05  | 538.56  | 1024.74 | 1135.88 | 920.16  | 0.80  | 0.94  | 0.66  |
| Bulgaria                         | 3683.06 | 3861.77 | 3499.33 | 5749.08 | 6401    | 5064.89 | 0.55  | 0.65  | 0.44  |
| Burkina Faso                     | 1077.14 | 1138.86 | 1012.54 | 909.97  | 989.09  | 829.83  | -0.15 | -0.13 | -0.17 |
| Burundi                          | 1008.59 | 1052.98 | 962.63  | 941.52  | 903.98  | 979.87  | -0.04 | -0.12 | 0.06  |
| Cambodia                         | 770.67  | 809.22  | 729.37  | 1149.32 | 1276.82 | 1015.42 | 0.52  | 0.60  | 0.43  |
| Cameroon                         | 1149.55 | 1151.96 | 1147.11 | 1087.89 | 1076.39 | 1099.38 | -0.04 | -0.05 | -0.02 |
| Canada                           | 1783.83 | 1792.19 | 1775.33 | 2238.26 | 2170.27 | 2307.2  | 0.24  | 0.20  | 0.28  |
| Cape Verde                       | 1526.19 | 1579.47 | 1467.26 | 1861.36 | 2018.51 | 1700    | 0.21  | 0.27  | 0.15  |
| Central African Republic         | 1031.76 | 1073.03 | 989.09  | 1000    | 1055.75 | 942.76  | -0.03 | -0.01 | -0.04 |
| Chad                             | 1045.96 | 1051.34 | 1040.5  | 875.4   | 870.35  | 880.44  | -0.16 | -0.17 | -0.15 |
| Chile                            | 1366.27 | 1435.03 | 1295.65 | 2223.44 | 2391.86 | 2050.52 | 0.60  | 0.64  | 0.55  |
| China                            | 1074.55 | 1129.88 | 1022.05 | 2125.8  | 2202.08 | 2053.95 | 1.02  | 0.97  | 1.06  |
| Colombia                         | 1430.41 | 1523.37 | 1336.24 | 2620.91 | 2714.72 | 2524.2  | 0.82  | 0.77  | 0.87  |
| Comoros                          | 1090.92 | 1134.08 | 1048.05 | 1103.93 | 1098.58 | 1109.17 | 0.01  | -0.03 | 0.06  |
| Congo                            | 1219.11 | 1278.17 | 1159.75 | 1206.07 | 1254.2  | 1158.01 | -0.01 | -0.02 | 0.00  |
| Costa Rica                       | 1618.64 | 1670.52 | 1567.59 | 2973.27 | 3010.25 | 2936.33 | 0.81  | 0.78  | 0.85  |
| Cote d'Ivoire                    | 1098.53 | 975.57  | 1211.83 | 1177.75 | 1006.53 | 1343.13 | 0.08  | 0.04  | 0.12  |
| Croatia                          | 3411.36 | 3917.58 | 2873.41 | 5492.44 | 6151.8  | 4784.79 | 0.60  | 0.56  | 0.65  |
| Cuba                             | 2761.88 | 2753.07 | 2770.55 | 4582.37 | 4623.2  | 4541.93 | 0.64  | 0.67  | 0.62  |
| Cyprus                           | 2410.21 | 2479.84 | 2338.8  | 3170.53 | 3283.72 | 3049.52 | 0.29  | 0.30  | 0.27  |
| Czech Republic                   | 3564.91 | 4078.04 | 3020.98 | 5020.39 | 5562.86 | 4460.46 | 0.40  | 0.35  | 0.46  |
| Democratic Republic of the Congo | 883.88  | 962.82  | 803     | 828     | 866     | 789.8   | -0.06 | -0.10 | -0.01 |
| Denmark                          | 3731.94 | 4155.55 | 3295.97 | 4035.8  | 4284.93 | 3782.69 | 0.08  | 0.03  | 0.14  |
| Djibouti                         | 1043.97 | 1066.28 | 1021.92 | 1613.94 | 1581.82 | 1645.78 | 0.54  | 0.48  | 0.60  |
| Dominica                         | 2001.22 | 1987.57 | 2014.97 | 2896.17 | 2931.9  | 2859.87 | 0.46  | 0.48  | 0.43  |
| Dominican Republic               | 1320.28 | 1222.64 | 1416.63 | 2291.88 | 2259.16 | 2324.82 | 0.73  | 0.84  | 0.64  |
| Ecuador                          | 1466.33 | 1480.45 | 1452.38 | 2365.01 | 2383.19 | 2346.83 | 0.62  | 0.61  | 0.62  |
| Egypt                            | 1335.04 | 1412.47 | 1258.14 | 1572.05 | 1653.42 | 1492.38 | 0.18  | 0.17  | 0.19  |
| El Salvador                      | 1382.32 | 1422.76 | 1339.98 | 2514.8  | 2585.87 | 2434.46 | 0.83  | 0.82  | 0.84  |
| Equatorial Guinea                | 1246.32 | 1326.92 | 1169.2  | 1242.25 | 1173.49 | 1307.65 | 0.00  | -0.11 | 0.12  |
| Eritrea                          | 660.94  | 717.74  | 603.42  | 873.13  | 929.64  | 816.82  | 0.33  | 0.30  | 0.36  |
| Estonia                          | 3319.3  | 4028.47 | 2512.29 | 5159.5  | 6193.64 | 3945.26 | 0.54  | 0.52  | 0.55  |
| Ethiopia                         | 970.95  | 922.17  | 1020.04 | 1144.1  | 1129.09 | 1159.16 | 0.19  | 0.23  | 0.15  |
| Federated States of Micronesia   | 812.98  | 838.56  | 788.49  | 1107.98 | 1176.88 | 1042.36 | 0.36  | 0.40  | 0.31  |
| Fiji                             | 745.04  | 745.2   | 744.9   | 1419.96 | 1480.97 | 1360.97 | 0.89  | 0.98  | 0.81  |
| Finland                          | 3105.13 | 3634.61 | 2543.38 | 4125.42 | 4523.08 | 3715.54 | 0.31  | 0.24  | 0.44  |
| France                           | 3235.52 | 3663.36 | 2784.39 | 4042.19 | 4479.28 | 3576.8  | 0.24  | 0.22  | 0.28  |



|                  |         |         |         |         |         |         |       |       |       |
|------------------|---------|---------|---------|---------|---------|---------|-------|-------|-------|
| Gabon            | 1699.98 | 1826.34 | 1568.35 | 1513.13 | 1599.75 | 1428.45 | -0.11 | -0.12 | -0.09 |
| Georgia          | 2794.48 | 3219.57 | 2325.64 | 4209.51 | 4757.89 | 3609.69 | 0.50  | 0.47  | 0.54  |
| Germany          | 3609.09 | 4120.98 | 3059.14 | 4654.45 | 4844.65 | 4457.79 | 0.28  | 0.17  | 0.44  |
| Ghana            | 954.78  | 941.95  | 967.21  | 1167.86 | 1174.9  | 1160.74 | 0.24  | 0.26  | 0.22  |
| Greece           | 3191.16 | 3351.9  | 3026.3  | 4424.6  | 4743.11 | 4090.31 | 0.37  | 0.41  | 0.34  |
| Greenland        | 702.08  | 659.88  | 738.6   | 1297.45 | 1043.08 | 1517.99 | 0.81  | 0.57  | 1.00  |
| Grenada          | 2074.77 | 2283.23 | 1860.84 | 2233.37 | 2429.29 | 2038.67 | 0.09  | 0.07  | 0.12  |
| Guam             | 940.17  | 991.34  | 895.48  | 2014.31 | 2117.05 | 1914.46 | 1.16  | 1.15  | 1.17  |
| Guatemala        | 1107.4  | 1097.25 | 1117.71 | 1513.16 | 1555.33 | 1469.15 | 0.40  | 0.44  | 0.35  |
| Guinea           | 1194.94 | 1190.98 | 1198.97 | 1134.96 | 1106.75 | 1163.04 | -0.05 | -0.07 | -0.03 |
| Guinea-Bissau    | 1254.59 | 1263.19 | 1245.78 | 1194.98 | 1171.65 | 1218.61 | -0.04 | -0.07 | -0.01 |
| Guyana           | 1219.1  | 1192.72 | 1246.32 | 1933.89 | 1936.14 | 1931.67 | 0.59  | 0.62  | 0.56  |
| Haiti            | 1272.73 | 1261.49 | 1284.3  | 1494.05 | 1518.72 | 1468.85 | 0.21  | 0.22  | 0.19  |
| Honduras         | 1174.62 | 1194.33 | 1155.04 | 1774.25 | 1770.84 | 1777.66 | 0.51  | 0.48  | 0.55  |
| Hungary          | 4150.95 | 4669.03 | 3590.52 | 5764.46 | 6626.17 | 4814.54 | 0.38  | 0.41  | 0.33  |
| Iceland          | 2322.39 | 2474.46 | 2171.66 | 2945.28 | 3060.92 | 2827.17 | 0.25  | 0.23  | 0.28  |
| India            | 1045.31 | 1045.28 | 1045.33 | 1520.99 | 1565.65 | 1479.49 | 0.46  | 0.50  | 0.42  |
| Indonesia        | 1061.33 | 1088.69 | 1034.19 | 1554.8  | 1605.87 | 1504.48 | 0.49  | 0.49  | 0.48  |
| Iran             | 965.35  | 891.9   | 1036.13 | 1590.52 | 1479.92 | 1699.46 | 0.62  | 0.63  | 0.62  |
| Iraq             | 1074.65 | 1069.92 | 1079.31 | 1014.97 | 1065.66 | 965.54  | -0.06 | -0.01 | -0.11 |
| Ireland          | 2637.89 | 2835.76 | 2438.27 | 2756.13 | 2865.3  | 2643.72 | 0.03  | 0.00  | 0.07  |
| Israel           | 2090.15 | 2179.61 | 2000.36 | 2458.88 | 2661.47 | 2252.85 | 0.17  | 0.22  | 0.12  |
| Italy            | 3527.26 | 3886.53 | 3146.06 | 4482.48 | 4924.28 | 4012.76 | 0.26  | 0.26  | 0.26  |
| Jamaica          | 2031.67 | 2069.85 | 1992.52 | 2690.14 | 2666.41 | 2714.06 | 0.31  | 0.28  | 0.35  |
| Japan            | 2296.3  | 2538.37 | 2045.51 | 4037.62 | 4549.11 | 3498.94 | 0.72  | 0.77  | 0.66  |
| Jordan           | 956.89  | 928.56  | 982.53  | 1097.07 | 1086.79 | 1106.86 | 0.13  | 0.16  | 0.11  |
| Kazakhstan       | 1877.85 | 2287.89 | 1442.1  | 2444.05 | 2813.69 | 2047.99 | 0.30  | 0.23  | 0.42  |
| Kenya            | 897.41  | 877.66  | 917.3   | 963.51  | 987.1   | 939.93  | 0.08  | 0.13  | 0.03  |
| Kiribati         | 851.79  | 928.61  | 773.38  | 1030.38 | 1139.53 | 918.43  | 0.21  | 0.23  | 0.19  |
| Kuwait           | 677.04  | 509.82  | 823.3   | 890.81  | 804.45  | 958.21  | 0.30  | 0.56  | 0.15  |
| Kyrgyzstan       | 1636.6  | 1933.71 | 1326.72 | 1676.59 | 1856.39 | 1492.95 | 0.02  | -0.04 | 0.12  |
| Laos             | 973.5   | 1027.31 | 919.61  | 1149.89 | 1215.14 | 1083.99 | 0.20  | 0.20  | 0.20  |
| Latvia           | 3357.89 | 4051.42 | 2559.05 | 4993.74 | 6015.09 | 3804.25 | 0.47  | 0.47  | 0.47  |
| Lebanon          | 1746.98 | 1662.23 | 1834.07 | 2400.22 | 2280.08 | 2519.14 | 0.36  | 0.36  | 0.36  |
| Lesotho          | 1812.86 | 1954.26 | 1663.11 | 1771.38 | 2030.46 | 1507.06 | -0.03 | 0.04  | -0.10 |
| Liberia          | 1075.45 | 1037.79 | 1113.33 | 1152.84 | 1140.41 | 1165.07 | 0.08  | 0.10  | 0.05  |
| Libya            | 996.79  | 963.14  | 1026.93 | 1577.3  | 1587.64 | 1567.08 | 0.57  | 0.63  | 0.52  |
| Lithuania        | 3208.54 | 3737.14 | 2620.24 | 5379.82 | 6416.53 | 4174.14 | 0.66  | 0.70  | 0.57  |
| Luxembourg       | 3152.5  | 3588.94 | 2698.24 | 3300.15 | 3611.14 | 2987.91 | 0.05  | 0.01  | 0.10  |
| Macedonia        | 2161.63 | 2204.59 | 2119.18 | 3724.69 | 3976.7  | 3470.47 | 0.70  | 0.78  | 0.62  |
| Madagascar       | 1109.32 | 1014.91 | 1204.04 | 1108.19 | 1087.19 | 1129.32 | 0.01  | 0.08  | -0.05 |
| Malawi           | 1009.57 | 1042.29 | 975.69  | 1131.46 | 1168.44 | 1094.34 | 0.14  | 0.14  | 0.15  |
| Malaysia         | 1001.02 | 989.36  | 1012.34 | 1648.99 | 1599.14 | 1699.78 | 0.64  | 0.61  | 0.67  |
| Maldives         | 924.09  | 722.73  | 1115.31 | 1447.44 | 1363.47 | 1530.95 | 0.56  | 0.88  | 0.38  |
| Mali             | 1209.17 | 1200.1  | 1218.43 | 933.7   | 955.37  | 912.47  | -0.22 | -0.20 | -0.24 |
| Malta            | 2403.46 | 2551.32 | 2250.34 | 3913.66 | 4148.27 | 3677.15 | 0.60  | 0.60  | 0.59  |
| Marshall Islands | 630.58  | 658.62  | 603.76  | 914.87  | 971.93  | 859.76  | 0.45  | 0.47  | 0.42  |
| Mauritania       | 1095.87 | 1126.19 | 1065.38 | 1235.33 | 1259.73 | 1211.26 | 0.13  | 0.12  | 0.15  |
| Mauritius        | 1323.92 | 1467.35 | 1179.91 | 2759.45 | 2956.25 | 2557.78 | 1.06  | 1.00  | 1.13  |
| Mexico           | 1453.98 | 1527.36 | 1379.83 | 2342.22 | 2398.8  | 2285.05 | 0.60  | 0.56  | 0.64  |
| Moldova          | 2283.26 | 2578.42 | 1959.45 | 3264.1  | 3726.58 | 2764.09 | 0.41  | 0.43  | 0.39  |
| Mongolia         | 1241.36 | 1269.73 | 1212.33 | 1473.53 | 1578.11 | 1366.83 | 0.18  | 0.23  | 0.12  |
| Montenegro       | 2767.37 | 3133.01 | 2398.54 | 4446.02 | 4776.18 | 4108    | 0.59  | 0.51  | 0.69  |
| Morocco          | 1127.93 | 1147.49 | 1108.3  | 1961.55 | 1955.21 | 1968.04 | 0.72  | 0.69  | 0.76  |
| Mozambique       | 1208.99 | 1262.17 | 1151.01 | 1273.63 | 1334.06 | 1210.41 | 0.06  | 0.06  | 0.06  |
| Myanmar          | 1174.74 | 1220.67 | 1126.94 | 1727.95 | 1818.1  | 1633.66 | 0.51  | 0.52  | 0.49  |
| Namibia          | 1527.96 | 1615.99 | 1436.11 | 1752.95 | 1870.29 | 1629.34 | 0.15  | 0.16  | 0.14  |
| Nepal            | 1017.54 | 1122.65 | 910.9   | 1536.24 | 1560.29 | 1510.67 | 0.52  | 0.40  | 0.68  |
| Netherlands      | 2861.38 | 3224.09 | 2490.44 | 3563.1  | 3794.25 | 3328.08 | 0.23  | 0.17  | 0.32  |
| New Zealand      | 2334.06 | 2267.65 | 2402.51 | 2905.6  | 2694.4  | 3124.87 | 0.23  | 0.17  | 0.28  |
| Nicaragua        | 1133.05 | 1215.88 | 1048.96 | 1878.82 | 1978.48 | 1776.32 | 0.67  | 0.63  | 0.71  |

|                                  |         |         |         |         |         |         |       |       |       |
|----------------------------------|---------|---------|---------|---------|---------|---------|-------|-------|-------|
| Niger                            | 920.69  | 916.3   | 925.23  | 1001.67 | 929.14  | 1073.02 | 0.10  | 0.02  | 0.18  |
| Nigeria                          | 1049.31 | 1048.39 | 1050.2  | 1050.81 | 1018.67 | 1081.75 | 0.00  | -0.03 | 0.03  |
| North Korea                      | 944.79  | 1211.46 | 662.36  | 1656.43 | 2036.1  | 1259.65 | 0.76  | 0.69  | 0.91  |
| Northern Mariana Islands         | 521.05  | 484.89  | 553.55  | 556.12  | 465.28  | 647.61  | 0.08  | -0.03 | 0.20  |
| Norway                           | 3534.45 | 3918.36 | 3141.88 | 3339.11 | 3621.52 | 3059.98 | -0.06 | -0.08 | -0.04 |
| Oman                             | 692.62  | 775.4   | 626.58  | 927.08  | 995.85  | 892.21  | 0.33  | 0.28  | 0.42  |
| Pakistan                         | 1115    | 1032.97 | 1191.14 | 1365.3  | 1362.73 | 1367.73 | 0.23  | 0.32  | 0.15  |
| Palestine                        | 720.54  | 730.46  | 710.85  | 962.48  | 973.74  | 951.54  | 0.32  | 0.32  | 0.32  |
| Panama                           | 1618.25 | 1631.84 | 1604.97 | 2758.78 | 2781.19 | 2736.5  | 0.73  | 0.73  | 0.74  |
| Papua New Guinea                 | 535.02  | 575.26  | 496.61  | 745.85  | 808.33  | 685.82  | 0.40  | 0.41  | 0.38  |
| Paraguay                         | 1826.31 | 1881.81 | 1772.07 | 2755.34 | 2741.87 | 2768.41 | 0.49  | 0.44  | 0.55  |
| Peru                             | 1374.51 | 1391.73 | 1357.29 | 2341.98 | 2402.79 | 2281.09 | 0.71  | 0.73  | 0.68  |
| Philippines                      | 844.85  | 903.86  | 787.07  | 1333.92 | 1437.93 | 1231.83 | 0.59  | 0.60  | 0.58  |
| Poland                           | 3309.85 | 3782.62 | 2812.62 | 4927.57 | 5581.34 | 4223.97 | 0.47  | 0.46  | 0.49  |
| Portugal                         | 3158.33 | 3428.56 | 2867.69 | 4204.05 | 4624.75 | 3755.43 | 0.31  | 0.33  | 0.28  |
| Puerto Rico                      | 2908.24 | 2889.54 | 2928.13 | 4391.75 | 4660.6  | 4101.32 | 0.50  | 0.60  | 0.39  |
| Qatar                            | 666.48  | 557.16  | 720.45  | 727.57  | 673.31  | 747.87  | 0.08  | 0.19  | 0.03  |
| Romania                          | 3330.32 | 3613.59 | 3038.91 | 5377.08 | 5938.67 | 4779.33 | 0.60  | 0.63  | 0.56  |
| Russia                           | 2918.43 | 3657.95 | 2078.64 | 4140.65 | 4943.21 | 3198.16 | 0.41  | 0.34  | 0.52  |
| Rwanda                           | 796.41  | 814.4   | 777.77  | 990.41  | 1060.83 | 913.81  | 0.25  | 0.31  | 0.18  |
| Saint Lucia                      | 1968.32 | 1987.72 | 1948.36 | 2801.32 | 2834.37 | 2767    | 0.44  | 0.44  | 0.45  |
| Saint Vincent and the Grenadines | 1707.02 | 1813.41 | 1599.56 | 2420.73 | 2433.4  | 2408.3  | 0.43  | 0.34  | 0.52  |
| Samoa                            | 942.59  | 1016.44 | 874.52  | 1358.35 | 1494.17 | 1230.81 | 0.43  | 0.46  | 0.40  |
| Sao Tome and Principe            | 1575.88 | 1562.81 | 1589.2  | 1241.91 | 1280.37 | 1203.17 | -0.21 | -0.18 | -0.24 |
| Saudi Arabia                     | 836.62  | 882.68  | 800.39  | 1195.32 | 1138.14 | 1239.25 | 0.41  | 0.27  | 0.52  |
| Senegal                          | 1046.87 | 1038.63 | 1055.19 | 1064.67 | 1106.57 | 1021.23 | 0.02  | 0.07  | -0.02 |
| Serbia                           | 3041.48 | 3290.16 | 2786.11 | 4997.18 | 5416.27 | 4557.62 | 0.63  | 0.63  | 0.62  |
| Seychelles                       | 1809.61 | 2031.62 | 1586.65 | 2410.92 | 2663.64 | 2164.9  | 0.33  | 0.31  | 0.36  |
| Sierra Leone                     | 1209.4  | 1114.16 | 1306.62 | 1057.8  | 1002.92 | 1113.81 | -0.11 | -0.09 | -0.13 |
| Singapore                        | 1257.8  | 1454.74 | 1065.99 | 2410.33 | 2829.11 | 1976.62 | 0.87  | 0.91  | 0.81  |
| Slovakia                         | 2824.71 | 3155.75 | 2478.02 | 4028.18 | 4614.69 | 3409.31 | 0.41  | 0.45  | 0.36  |
| Slovenia                         | 3270.8  | 3827.51 | 2680.49 | 5184.2  | 5802.76 | 4554.53 | 0.56  | 0.50  | 0.67  |
| Solomon Islands                  | 646.7   | 598.25  | 692.57  | 789.77  | 769.68  | 809.24  | 0.22  | 0.29  | 0.17  |
| Somalia                          | 1129.89 | 1130.68 | 1129.08 | 1010.61 | 1003.73 | 1017.57 | -0.10 | -0.11 | -0.10 |
| South Africa                     | 2032.84 | 2221.59 | 1839.7  | 2624.16 | 2946.71 | 2290.22 | 0.29  | 0.32  | 0.24  |
| South Korea                      | 896.83  | 1039.76 | 754.53  | 2103.85 | 2438.56 | 1765.08 | 1.28  | 1.28  | 1.26  |
| South Sudan                      | 1111.32 | 1101.2  | 1121.53 | 1252.02 | 1235.41 | 1268.59 | 0.13  | 0.12  | 0.13  |
| Spain                            | 3084.81 | 3508.59 | 2643.3  | 3690.96 | 4212.75 | 3155.7  | 0.19  | 0.19  | 0.18  |
| Sri Lanka                        | 1412.11 | 1362.06 | 1461.19 | 2396.45 | 2506.03 | 2278.65 | 0.72  | 0.86  | 0.59  |
| Sudan                            | 832.9   | 820.08  | 845.62  | 991.79  | 993.63  | 989.98  | 0.20  | 0.21  | 0.18  |
| Suriname                         | 1495.94 | 1529.7  | 1463.25 | 2232.21 | 2351.7  | 2113.17 | 0.49  | 0.53  | 0.44  |
| Swaziland                        | 1266.67 | 1304.25 | 1224.63 | 1570.67 | 1677.84 | 1461.24 | 0.24  | 0.28  | 0.19  |
| Sweden                           | 3980.33 | 4307.61 | 3645.12 | 3946.38 | 4163.01 | 3729.31 | -0.02 | -0.04 | 0.01  |
| Switzerland                      | 3276.34 | 3678.81 | 2854.85 | 3654.46 | 3980.85 | 3320.71 | 0.11  | 0.08  | 0.15  |
| Syria                            | 912.44  | 877.74  | 946.04  | 1331.3  | 1364.61 | 1298.81 | 0.45  | 0.55  | 0.36  |
| Taiwan                           | 1131.49 | 1148.79 | 1115.42 | 2335.74 | 2491.2  | 2179.77 | 1.11  | 1.19  | 1.02  |
| Tajikistan                       | 1160.66 | 1272.42 | 1047.56 | 1100.86 | 1090.11 | 1111.35 | -0.05 | -0.15 | 0.06  |
| Tanzania                         | 1063.34 | 1084.13 | 1042.18 | 1169.81 | 1131.89 | 1208.2  | 0.12  | 0.06  | 0.18  |
| Thailand                         | 1290.34 | 1331.23 | 1248.69 | 2875.24 | 2984.18 | 2763.18 | 1.23  | 1.23  | 1.21  |
| The Bahamas                      | 1481.12 | 1582.98 | 1377.84 | 2813.65 | 2967.85 | 2652.85 | 0.88  | 0.85  | 0.91  |
| The Gambia                       | 929.27  | 808.1   | 1048.71 | 920.63  | 836.31  | 1006.61 | -0.01 | 0.04  | -0.04 |
| Timor-Leste                      | 595.41  | 604.1   | 586.93  | 1184.55 | 1204.26 | 1165.45 | 1.01  | 1.01  | 1.00  |
| Togo                             | 994.28  | 1005.84 | 982.42  | 991.53  | 994.77  | 988.21  | 0.01  | -0.01 | 0.02  |
| Tonga                            | 1084.88 | 1155.84 | 1015.64 | 1471.79 | 1649.12 | 1295.42 | 0.35  | 0.42  | 0.27  |
| Trinidad and Tobago              | 1738.38 | 1805.54 | 1670.72 | 3015.62 | 3129.9  | 2898.31 | 0.72  | 0.71  | 0.72  |
| Tunisia                          | 1400.18 | 1350.87 | 1448.9  | 2431.95 | 2481.26 | 2381.48 | 0.71  | 0.81  | 0.62  |
| Turkey                           | 1755.5  | 1785.16 | 1725.11 | 2339.36 | 2509.14 | 2163.57 | 0.32  | 0.40  | 0.25  |
| Turkmenistan                     | 1207.86 | 1386.78 | 1023.93 | 1553.45 | 1695.82 | 1406.22 | 0.28  | 0.21  | 0.36  |
| Uganda                           | 878.01  | 880.93  | 875.05  | 798.82  | 814.51  | 783.12  | -0.08 | -0.07 | -0.09 |
| Ukraine                          | 3526.71 | 4248.6  | 2686.65 | 4909.64 | 5770.37 | 3893    | 0.38  | 0.35  | 0.44  |
| United Arab Emirates             | 529.03  | 483.97  | 552.43  | 745.64  | 528.24  | 824.88  | 0.39  | 0.08  | 0.47  |

|                      |         |         |         |         |         |         |       |       |      |
|----------------------|---------|---------|---------|---------|---------|---------|-------|-------|------|
| United Kingdom       | 3565.3  | 3937.99 | 3171.08 | 3700.62 | 3907.67 | 3488.4  | 0.03  | -0.01 | 0.09 |
| United States        | 1850.29 | 1942.03 | 1753.81 | 2437.32 | 2512.79 | 2359.29 | 0.31  | 0.29  | 0.33 |
| Uruguay              | 2351.52 | 2484.69 | 2210.15 | 2716.66 | 3063.44 | 2345.18 | 0.15  | 0.22  | 0.05 |
| Uzbekistan           | 1166.08 | 1329.11 | 999.43  | 1510.93 | 1640.35 | 1377.26 | 0.29  | 0.22  | 0.37 |
| Vanuatu              | 856.07  | 760.26  | 946.66  | 1033.52 | 1029.01 | 1037.92 | 0.17  | 0.32  | 0.05 |
| Venezuela            | 1412.82 | 1466.87 | 1359.6  | 2433.06 | 2527.32 | 2338    | 0.70  | 0.71  | 0.69 |
| Vietnam              | 1372.14 | 1558.32 | 1180.22 | 1949.13 | 2245.68 | 1646.19 | 0.45  | 0.46  | 0.44 |
| Virgin Islands, U.S. | 2006.67 | 2004.24 | 2009.25 | 5070.66 | 5079.72 | 5060.7  | 1.50  | 1.51  | 1.49 |
| Yemen                | 729.57  | 784.53  | 673.61  | 845.63  | 851.53  | 839.86  | 0.16  | 0.08  | 0.24 |
| Zambia               | 976.37  | 989.68  | 962.83  | 1052.86 | 1082.57 | 1023.07 | 0.09  | 0.11  | 0.08 |
| Zimbabwe             | 1256.38 | 1272.13 | 1240.49 | 1235.23 | 1240    | 1230.32 | -0.01 | -0.02 | 0.00 |

eTable 4b. All-ages mortality rate for men and women separately and combined, for all CVD level 3 and 4 subcauses, by country in 1990 and 2015

|                                  | 1990  |        |       | 2015  |        |       | Median percent change between 1990-2015 |        |       |
|----------------------------------|-------|--------|-------|-------|--------|-------|-----------------------------------------|--------|-------|
|                                  | Both  | Female | Male  | Both  | Female | Male  | Both                                    | Female | Male  |
| <b>Aortic aneurysm</b>           |       |        |       |       |        |       |                                         |        |       |
| Afghanistan                      | 0.56  | 0.3    | 0.8   | 0.78  | 0.45   | 1.09  | 1.10                                    | 1.17   | 1.05  |
| Albania                          | 0.68  | 0.44   | 0.91  | 1.58  | 1.09   | 2.08  | 0.69                                    | 0.82   | 0.64  |
| Algeria                          | 0.46  | 0.33   | 0.59  | 0.77  | 0.64   | 0.9   | 0.87                                    | 1.16   | 0.73  |
| American Samoa                   | 1.73  | 1.68   | 1.77  | 1.32  | 1.39   | 1.25  | -0.04                                   | -0.17  | 0.05  |
| Andorra                          | 6.56  | 4.41   | 8.84  | 8.32  | 5.4    | 11.37 | 0.05                                    | 0.11   | 0.02  |
| Angola                           | 0.9   | 0.54   | 1.27  | 0.92  | 0.68   | 1.15  | 1.22                                    | 1.54   | 1.16  |
| Antigua and Barbuda              | 2.05  | 1.75   | 2.36  | 2.29  | 2.01   | 2.61  | 0.25                                    | 0.33   | 0.18  |
| Argentina                        | 6.26  | 3.99   | 8.62  | 6.78  | 5.21   | 8.42  | 0.06                                    | 0.16   | 0.06  |
| Armenia                          | 4.62  | 3.42   | 5.9   | 9.44  | 6.97   | 12.28 | 0.57                                    | 0.61   | 0.59  |
| Australia                        | 8.48  | 5.63   | 11.35 | 6.73  | 5.45   | 8.01  | -0.17                                   | -0.02  | -0.23 |
| Austria                          | 5.62  | 4.37   | 6.98  | 5.28  | 4.46   | 6.14  | 0.06                                    | 0.16   | -0.01 |
| Azerbaijan                       | 0.86  | 0.37   | 1.38  | 1.28  | 0.53   | 2.03  | 0.83                                    | 0.91   | 0.75  |
| Bahrain                          | 0.36  | 0.18   | 0.49  | 0.32  | 0.18   | 0.4   | 0.55                                    | 0.72   | 0.48  |
| Bangladesh                       | 0.29  | 0.19   | 0.39  | 0.58  | 0.38   | 0.77  | 2.39                                    | 2.81   | 2.12  |
| Barbados                         | 3.52  | 2.37   | 4.76  | 4.57  | 3.4    | 5.84  | 0.07                                    | 0.17   | 0.05  |
| Belarus                          | 1.84  | 1.26   | 2.49  | 4.49  | 2.85   | 6.38  | 0.79                                    | 0.80   | 0.74  |
| Belgium                          | 7.65  | 4.62   | 10.81 | 7.57  | 4.76   | 10.48 | 0.04                                    | 0.07   | 0.03  |
| Belize                           | 0.96  | 0.89   | 1.02  | 1.28  | 1.05   | 1.51  | 0.51                                    | 0.55   | 0.49  |
| Benin                            | 0.61  | 0.57   | 0.64  | 0.41  | 0.25   | 0.58  | 0.18                                    | -0.23  | 0.51  |
| Bermuda                          | 8.33  | 4.15   | 12.57 | 8.56  | 5.06   | 12.13 | 0.21                                    | 0.37   | 0.18  |
| Bhutan                           | 0.32  | 0.21   | 0.42  | 0.77  | 0.43   | 1.06  | 3.43                                    | 3.36   | 3.14  |
| Bolivia                          | 0.61  | 0.44   | 0.78  | 1.12  | 0.88   | 1.36  | 1.81                                    | 1.93   | 1.82  |
| Bosnia and Herzegovina           | 1.91  | 1.13   | 2.7   | 3.79  | 2.4    | 5.19  | 0.58                                    | 0.64   | 0.60  |
| Botswana                         | 1.11  | 0.79   | 1.44  | 1.74  | 0.89   | 2.59  | 0.07                                    | -0.17  | 0.17  |
| Brazil                           | 2.27  | 1.21   | 3.34  | 4.79  | 3.6    | 6.02  | 0.96                                    | 1.67   | 0.70  |
| Brunei                           | 1.62  | 1.53   | 1.69  | 2.66  | 2.75   | 2.58  | 0.51                                    | 0.65   | 0.40  |
| Bulgaria                         | 2.17  | 1.3    | 3.07  | 3.89  | 2.61   | 5.23  | 0.46                                    | 0.56   | 0.45  |
| Burkina Faso                     | 0.77  | 0.82   | 0.73  | 0.45  | 0.38   | 0.53  | 0.11                                    | -0.13  | 0.38  |
| Burundi                          | 1.51  | 0.88   | 2.15  | 0.67  | 0.45   | 0.91  | 0.09                                    | 0.21   | 0.04  |
| Cambodia                         | 0.59  | 0.43   | 0.76  | 0.98  | 0.75   | 1.22  | 2.27                                    | 2.56   | 2.16  |
| Cameroon                         | 1.05  | 1.02   | 1.09  | 0.57  | 0.36   | 0.78  | -0.34                                   | -0.56  | -0.15 |
| Canada                           | 7.15  | 4.64   | 9.7   | 5.95  | 4.46   | 7.46  | -0.24                                   | -0.18  | -0.25 |
| Cape Verde                       | 0.38  | 0.18   | 0.61  | 0.61  | 0.29   | 0.94  | 1.07                                    | 1.09   | 1.05  |
| Central African Republic         | 1.45  | 0.76   | 2.16  | 1.6   | 0.83   | 2.39  | 0.29                                    | 0.20   | 0.30  |
| Chad                             | 0.59  | 0.6    | 0.59  | 0.36  | 0.24   | 0.48  | -0.10                                   | -0.40  | 0.16  |
| Chile                            | 2.42  | 1.93   | 2.92  | 4.34  | 4.11   | 4.59  | 0.65                                    | 0.76   | 0.58  |
| China                            | 0.64  | 0.37   | 0.89  | 0.97  | 0.59   | 1.33  | 0.71                                    | 1.09   | 0.51  |
| Colombia                         | 1.92  | 0.97   | 2.89  | 2.69  | 1.63   | 3.77  | 0.52                                    | 0.69   | 0.51  |
| Comoros                          | 1.15  | 0.58   | 1.71  | 0.74  | 0.44   | 1.04  | 0.43                                    | 0.61   | 0.40  |
| Congo                            | 1.61  | 1      | 2.22  | 1.37  | 1.2    | 1.54  | 0.27                                    | 0.49   | 0.25  |
| Costa Rica                       | 1.34  | 0.56   | 2.11  | 2.64  | 1.34   | 3.94  | 0.58                                    | 0.87   | 0.53  |
| Cote d'Ivoire                    | 0.82  | 0.6    | 1.02  | 0.51  | 0.24   | 0.77  | -0.17                                   | -0.45  | -0.03 |
| Croatia                          | 2.52  | 1.62   | 3.48  | 7.07  | 4.54   | 9.79  | 1.46                                    | 1.30   | 1.64  |
| Cuba                             | 5.52  | 2.93   | 8.06  | 7.82  | 4.86   | 10.74 | 0.05                                    | 0.18   | 0.02  |
| Cyprus                           | 7.11  | 3.37   | 10.95 | 5.04  | 2.52   | 7.73  | -0.05                                   | 0.05   | -0.10 |
| Czech Republic                   | 2.83  | 1.62   | 4.11  | 5.13  | 3.79   | 6.51  | 1.17                                    | 1.72   | 0.96  |
| Democratic Republic of the Congo | 0.58  | 0.47   | 0.69  | 0.7   | 0.49   | 0.91  | 0.89                                    | 0.65   | 1.07  |
| Denmark                          | 11.17 | 6.63   | 15.84 | 11.24 | 7.61   | 14.92 | 0.26                                    | 0.43   | 0.19  |
| Djibouti                         | 1.03  | 0.5    | 1.55  | 1.54  | 0.73   | 2.34  | 0.73                                    | 0.75   | 0.71  |
| Dominica                         | 2.73  | 2.64   | 2.82  | 5.33  | 4.68   | 5.98  | 0.48                                    | 0.52   | 0.45  |
| Dominican Republic               | 0.75  | 0.4    | 1.1   | 1.55  | 1.03   | 2.08  | 0.79                                    | 1.19   | 0.65  |
| Ecuador                          | 1.03  | 0.69   | 1.36  | 1.94  | 1.36   | 2.52  | 0.89                                    | 0.99   | 0.84  |
| Egypt                            | 1.66  | 1.5    | 1.82  | 2.1   | 1.86   | 2.33  | 0.81                                    | 0.92   | 0.74  |
| El Salvador                      | 0.63  | 0.25   | 1.04  | 1.18  | 0.46   | 2     | 0.99                                    | 0.87   | 1.10  |
| Equatorial Guinea                | 1.56  | 0.93   | 2.16  | 1.45  | 0.95   | 1.92  | 1.05                                    | 1.20   | 1.00  |
| Eritrea                          | 0.76  | 0.43   | 1.1   | 0.86  | 0.59   | 1.13  | 0.84                                    | 0.99   | 0.80  |
| Estonia                          | 3.54  | 2.49   | 4.74  | 5.42  | 4.04   | 7.03  | 0.64                                    | 0.65   | 0.70  |
| Ethiopia                         | 1.12  | 0.51   | 1.73  | 0.74  | 0.45   | 1.04  | 1.04                                    | 1.50   | 0.92  |
| Federated States of Micronesia   | 1.94  | 1.35   | 2.49  | 2.51  | 2.04   | 2.96  | 0.49                                    | 0.66   | 0.40  |
| Fiji                             | 2.26  | 1.62   | 2.87  | 4.49  | 3.86   | 5.1   | 0.40                                    | 0.56   | 0.32  |
| Finland                          | 10.33 | 6.14   | 14.78 | 11.17 | 7.76   | 14.69 | 0.12                                    | 0.28   | 0.05  |
| France                           | 5.75  | 3.9    | 7.7   | 6.49  | 4.4    | 8.71  | 0.09                                    | 0.07   | 0.11  |
| Gabon                            | 2.83  | 1.66   | 4.04  | 2.29  | 1.71   | 2.85  | 0.31                                    | 0.59   | 0.20  |
| Georgia                          | 1.09  | 0.65   | 1.57  | 4.14  | 1.68   | 6.82  | 1.95                                    | 1.18   | 2.15  |
| Germany                          | 6.16  | 4.65   | 7.78  | 6.64  | 5.39   | 7.93  | 0.11                                    | 0.23   | 0.01  |
| Ghana                            | 1.03  | 1.36   | 0.7   | 0.75  | 0.77   | 0.72  | 0.08                                    | -0.10  | 0.43  |

|                          |       |      |       |       |       |       |       |       |       |
|--------------------------|-------|------|-------|-------|-------|-------|-------|-------|-------|
| Greece                   | 6.38  | 4.12 | 8.7   | 11.11 | 7     | 15.42 | 0.43  | 0.36  | 0.50  |
| Greenland                | 1.52  | 1.24 | 1.75  | 1.72  | 1.35  | 2.05  | 0.36  | 0.43  | 0.32  |
| Grenada                  | 3.28  | 1.9  | 4.69  | 4.46  | 2.73  | 6.18  | 0.38  | 0.45  | 0.34  |
| Guam                     | 3.52  | 1.15 | 5.59  | 6.37  | 3.52  | 9.13  | -0.05 | 0.52  | -0.12 |
| Guatemala                | 0.55  | 0.23 | 0.87  | 0.63  | 0.27  | 1     | 0.70  | 0.72  | 0.72  |
| Guinea                   | 0.57  | 0.6  | 0.53  | 0.38  | 0.22  | 0.53  | 0.12  | -0.35 | 0.60  |
| Guinea-Bissau            | 0.88  | 0.81 | 0.95  | 0.49  | 0.29  | 0.7   | -0.17 | -0.46 | 0.08  |
| Guyana                   | 1.19  | 0.87 | 1.52  | 2.25  | 1.55  | 2.95  | 0.86  | 0.83  | 0.87  |
| Haiti                    | 1.22  | 0.97 | 1.48  | 1.37  | 1.1   | 1.64  | 0.83  | 0.81  | 0.88  |
| Honduras                 | 0.33  | 0.23 | 0.43  | 0.77  | 0.33  | 1.22  | 1.54  | 0.50  | 2.26  |
| Hungary                  | 3.65  | 2.86 | 4.5   | 5.12  | 4.37  | 5.96  | 0.63  | 0.62  | 0.67  |
| Iceland                  | 4.67  | 3.49 | 5.85  | 4.8   | 3.29  | 6.34  | 0.19  | 0.19  | 0.17  |
| India                    | 0.47  | 0.27 | 0.65  | 1.28  | 0.7   | 1.82  | 2.81  | 2.92  | 2.60  |
| Indonesia                | 0.63  | 0.44 | 0.81  | 1.21  | 0.88  | 1.54  | 1.38  | 1.56  | 1.27  |
| Iran                     | 0.27  | 0.14 | 0.39  | 0.6   | 0.36  | 0.85  | 2.28  | 3.22  | 1.93  |
| Iraq                     | 1.72  | 1.73 | 1.72  | 1.9   | 1.81  | 1.99  | 0.37  | 0.46  | 0.33  |
| Ireland                  | 5.55  | 4.1  | 7.02  | 6.01  | 4.48  | 7.58  | 0.37  | 0.46  | 0.31  |
| Israel                   | 2.22  | 1.54 | 2.91  | 2.38  | 1.73  | 3.03  | 0.15  | 0.16  | 0.18  |
| Italy                    | 4.7   | 2.41 | 7.13  | 7.59  | 4.63  | 10.74 | 0.42  | 0.58  | 0.43  |
| Jamaica                  | 1.55  | 1.49 | 1.61  | 2.93  | 2.53  | 3.34  | 0.48  | 0.41  | 0.54  |
| Japan                    | 4.89  | 4.18 | 5.62  | 14.82 | 14.75 | 14.88 | 0.86  | 1.08  | 0.68  |
| Jordan                   | 0.83  | 0.48 | 1.14  | 0.75  | 0.47  | 1.02  | 0.57  | 0.89  | 0.41  |
| Kazakhstan               | 2.63  | 1.93 | 3.37  | 2.81  | 1.71  | 3.99  | 0.06  | -0.02 | 0.10  |
| Kenya                    | 0.5   | 0.33 | 0.68  | 0.7   | 0.41  | 0.98  | 0.83  | 0.75  | 0.83  |
| Kiribati                 | 0.75  | 0.58 | 0.93  | 0.98  | 0.88  | 1.08  | 0.64  | 1.12  | 0.36  |
| Kuwait                   | 0.35  | 0.21 | 0.47  | 0.53  | 0.29  | 0.72  | 1.06  | 0.85  | 1.12  |
| Kyrgyzstan               | 0.57  | 0.43 | 0.71  | 0.52  | 0.36  | 0.68  | 0.20  | 0.24  | 0.15  |
| Laos                     | 0.8   | 0.56 | 1.04  | 0.81  | 0.61  | 1.01  | 1.58  | 1.94  | 1.41  |
| Latvia                   | 3.2   | 1.94 | 4.65  | 4.26  | 2.76  | 6.02  | 0.35  | 0.40  | 0.36  |
| Lebanon                  | 0.95  | 0.58 | 1.33  | 0.99  | 0.76  | 1.22  | 0.55  | 0.68  | 0.55  |
| Lesotho                  | 1.26  | 0.83 | 1.72  | 1.86  | 1.07  | 2.67  | -0.16 | -0.27 | -0.07 |
| Liberia                  | 0.6   | 0.56 | 0.64  | 0.29  | 0.19  | 0.39  | 0.14  | -0.27 | 0.59  |
| Libya                    | 0.34  | 0.24 | 0.43  | 0.69  | 0.46  | 0.91  | 0.69  | 0.81  | 0.62  |
| Lithuania                | 2.44  | 1.58 | 3.39  | 4.4   | 2.82  | 6.25  | 0.57  | 0.53  | 0.61  |
| Luxembourg               | 6.54  | 4.26 | 8.91  | 4.67  | 3.53  | 5.81  | 0.08  | 0.19  | 0.04  |
| Macedonia                | 1.04  | 0.54 | 1.54  | 2.08  | 1.14  | 3.02  | 0.71  | 0.75  | 0.74  |
| Madagascar               | 1.43  | 0.74 | 2.12  | 1.49  | 0.83  | 2.14  | 0.78  | 0.90  | 0.71  |
| Malawi                   | 0.48  | 0.34 | 0.63  | 0.57  | 0.35  | 0.79  | 1.33  | 1.03  | 1.45  |
| Malaysia                 | 1.78  | 0.91 | 2.63  | 2.52  | 1.16  | 3.9   | 0.32  | 0.41  | 0.24  |
| Maldives                 | 0.9   | 0.57 | 1.22  | 0.92  | 0.55  | 1.28  | 1.42  | 1.87  | 1.18  |
| Mali                     | 0.69  | 0.72 | 0.67  | 0.24  | 0.2   | 0.28  | -0.36 | -0.49 | -0.22 |
| Malta                    | 2.85  | 1.35 | 4.41  | 3.88  | 2.07  | 5.72  | 0.18  | 0.27  | 0.18  |
| Marshall Islands         | 1.48  | 0.92 | 2.01  | 2.25  | 1.55  | 2.92  | 0.51  | 0.57  | 0.50  |
| Mauritania               | 0.77  | 0.68 | 0.85  | 0.32  | 0.25  | 0.38  | -0.20 | -0.33 | -0.08 |
| Mauritius                | 0.95  | 0.61 | 1.3   | 1.29  | 0.76  | 1.83  | 0.08  | -0.07 | 0.18  |
| Mexico                   | 0.63  | 0.27 | 0.98  | 0.8   | 0.38  | 1.22  | 0.23  | 0.25  | 0.26  |
| Moldova                  | 0.92  | 0.61 | 1.26  | 1.49  | 1.04  | 1.98  | 0.71  | 0.86  | 0.62  |
| Mongolia                 | 0.43  | 0.36 | 0.49  | 0.62  | 0.56  | 0.67  | 0.78  | 1.24  | 0.53  |
| Montenegro               | 5.57  | 3.74 | 7.4   | 10.42 | 6.32  | 14.62 | 0.53  | 0.55  | 0.45  |
| Morocco                  | 0.61  | 0.51 | 0.72  | 1.09  | 0.92  | 1.25  | 1.04  | 1.08  | 1.04  |
| Mozambique               | 0.54  | 0.28 | 0.83  | 0.87  | 0.42  | 1.33  | 1.77  | 1.65  | 1.76  |
| Myanmar                  | 0.81  | 0.75 | 0.88  | 1.47  | 1.35  | 1.6   | 1.73  | 1.93  | 1.66  |
| Namibia                  | 1.58  | 0.97 | 2.21  | 1.26  | 0.57  | 1.99  | -0.08 | -0.29 | -0.01 |
| Nepal                    | 0.27  | 0.18 | 0.37  | 0.57  | 0.31  | 0.85  | 2.68  | 2.45  | 2.66  |
| Netherlands              | 9.63  | 5.39 | 13.96 | 10.21 | 7.16  | 13.31 | 0.08  | 0.30  | 0.01  |
| New Zealand              | 11.24 | 8.23 | 14.35 | 9.24  | 7.9   | 10.64 | -0.08 | 0.02  | -0.14 |
| Nicaragua                | 0.31  | 0.15 | 0.47  | 0.6   | 0.3   | 0.91  | 1.27  | 1.37  | 1.25  |
| Niger                    | 0.38  | 0.36 | 0.4   | 0.2   | 0.12  | 0.28  | 0.19  | -0.20 | 0.51  |
| Nigeria                  | 0.7   | 0.71 | 0.69  | 0.32  | 0.2   | 0.44  | -0.13 | -0.43 | 0.17  |
| North Korea              | 0.64  | 0.53 | 0.75  | 1.15  | 0.92  | 1.38  | 0.34  | 0.34  | 0.34  |
| Northern Mariana Islands | 1.57  | 2.05 | 1.15  | 0.93  | 0.91  | 0.96  | -0.17 | -0.22 | 0.00  |
| Norway                   | 13.14 | 8.44 | 17.95 | 10.43 | 8.33  | 12.5  | 0.06  | 0.20  | 0.03  |
| Oman                     | 0.44  | 0.16 | 0.67  | 0.6   | 0.2   | 0.81  | 1.37  | 1.33  | 1.07  |
| Pakistan                 | 0.53  | 0.21 | 0.83  | 1.04  | 0.43  | 1.62  | 1.53  | 1.94  | 1.38  |
| Palestine                | 0.48  | 0.42 | 0.54  | 0.74  | 0.56  | 0.92  | 1.05  | 1.03  | 1.07  |
| Panama                   | 1.6   | 0.77 | 2.4   | 2.13  | 1.12  | 3.12  | 0.13  | 0.23  | 0.11  |
| Papua New Guinea         | 1.22  | 0.93 | 1.49  | 1.5   | 1.2   | 1.78  | 0.49  | 0.50  | 0.49  |
| Paraguay                 | 1.21  | 0.69 | 1.73  | 2.72  | 1.64  | 3.77  | 0.75  | 1.02  | 0.61  |
| Peru                     | 0.67  | 0.46 | 0.88  | 0.93  | 0.74  | 1.13  | 1.15  | 1.36  | 1.09  |
| Philippines              | 0.82  | 0.55 | 1.09  | 1.06  | 0.77  | 1.34  | 0.37  | 0.48  | 0.31  |

|                                        |       |       |       |       |       |       |       |       |       |
|----------------------------------------|-------|-------|-------|-------|-------|-------|-------|-------|-------|
| Poland                                 | 4.24  | 2     | 6.6   | 5.31  | 2.97  | 7.82  | 0.29  | 0.51  | 0.24  |
| Portugal                               | 2.86  | 1.92  | 3.87  | 3.93  | 2.47  | 5.49  | 0.47  | 0.37  | 0.52  |
| Puerto Rico                            | 2.37  | 1.27  | 3.53  | 2.51  | 1.9   | 3.18  | -0.09 | 0.08  | -0.11 |
| Qatar                                  | 0.38  | 0.16  | 0.49  | 0.29  | 0.14  | 0.34  | 0.35  | 0.68  | 0.23  |
| Romania                                | 2.06  | 1.69  | 2.45  | 3.76  | 3.32  | 4.22  | 0.48  | 0.59  | 0.40  |
| Russia                                 | 0.86  | 0.65  | 1.11  | 5.05  | 3.38  | 7.02  | 3.82  | 3.59  | 3.87  |
| Rwanda                                 | 0.9   | 0.64  | 1.16  | 0.71  | 0.54  | 0.9   | 0.85  | 0.93  | 0.81  |
| Saint Lucia                            | 4.45  | 4.13  | 4.78  | 6.72  | 6.91  | 6.53  | 0.42  | 0.53  | 0.33  |
| Saint Vincent and the Grenadines       | 3.59  | 1.9   | 5.29  | 3.21  | 2.4   | 4     | -0.25 | 0.17  | -0.43 |
| Samoa                                  | 1.71  | 1.25  | 2.13  | 2.32  | 2.39  | 2.25  | 0.30  | 0.46  | 0.25  |
| Sao Tome and Principe                  | 0.98  | 0.83  | 1.14  | 0.61  | 0.4   | 0.81  | 0.07  | -0.17 | 0.26  |
| Saudi Arabia                           | 0.2   | 0.11  | 0.28  | 0.31  | 0.14  | 0.45  | 1.60  | 1.68  | 1.42  |
| Senegal                                | 0.63  | 0.55  | 0.7   | 0.38  | 0.24  | 0.52  | 0.06  | -0.24 | 0.30  |
| Serbia                                 | 2.81  | 1.52  | 4.14  | 5.87  | 3.87  | 7.97  | 0.61  | 0.91  | 0.52  |
| Seychelles                             | 2.01  | 1.09  | 2.94  | 2.02  | 1.39  | 2.63  | 0.11  | 0.37  | 0.02  |
| Sierra Leone                           | 0.55  | 0.39  | 0.72  | 0.35  | 0.22  | 0.48  | 0.10  | -0.04 | 0.24  |
| Singapore                              | 2.34  | 1.42  | 3.23  | 3.11  | 2.5   | 3.74  | 0.16  | 0.40  | 0.09  |
| Slovakia                               | 1.92  | 1.43  | 2.43  | 2.91  | 2.03  | 3.84  | 0.77  | 0.51  | 1.00  |
| Slovenia                               | 2.65  | 1.81  | 3.54  | 4.63  | 3.2   | 6.08  | 0.75  | 0.66  | 0.83  |
| Solomon Islands                        | 1.43  | 0.88  | 1.95  | 1.81  | 1.3   | 2.3   | 0.51  | 0.66  | 0.46  |
| Somalia                                | 1.15  | 0.56  | 1.75  | 0.83  | 0.41  | 1.26  | 0.14  | 0.13  | 0.16  |
| South Africa                           | 2.35  | 1.67  | 3.06  | 2.39  | 1.4   | 3.41  | -0.13 | -0.25 | -0.08 |
| South Korea                            | 1.37  | 1.38  | 1.35  | 2.81  | 2.93  | 2.68  | 0.79  | 0.82  | 0.76  |
| South Sudan                            | 0.81  | 0.51  | 1.12  | 0.85  | 0.52  | 1.19  | 0.68  | 0.62  | 0.73  |
| Spain                                  | 3.84  | 2.11  | 5.64  | 5.36  | 2.89  | 7.89  | 0.42  | 0.32  | 0.51  |
| Sri Lanka                              | 1.2   | 0.76  | 1.63  | 1.89  | 1.4   | 2.42  | 0.69  | 0.78  | 0.68  |
| Sudan                                  | 0.52  | 0.31  | 0.72  | 0.65  | 0.4   | 0.89  | 1.23  | 1.36  | 1.17  |
| Suriname                               | 1.36  | 0.68  | 2.02  | 2.14  | 1.08  | 3.19  | 0.45  | 0.54  | 0.41  |
| Swaziland                              | 1.28  | 0.84  | 1.77  | 1.89  | 0.97  | 2.84  | -0.05 | -0.27 | 0.05  |
| Sweden                                 | 13.39 | 8.88  | 18.01 | 12.49 | 9.82  | 15.16 | 0.10  | 0.22  | 0.06  |
| Switzerland                            | 7.15  | 4.43  | 10    | 6.67  | 4.8   | 8.58  | 0.10  | 0.21  | 0.06  |
| Syria                                  | 0.7   | 0.49  | 0.9   | 0.89  | 0.72  | 1.06  | -0.01 | 0.50  | -0.23 |
| Taiwan                                 | 2.22  | 1.02  | 3.33  | 3.61  | 2.39  | 4.83  | 0.25  | 0.77  | 0.13  |
| Tajikistan                             | 0.36  | 0.23  | 0.5   | 0.39  | 0.23  | 0.55  | 1.01  | 1.04  | 0.93  |
| Tanzania                               | 0.63  | 0.41  | 0.86  | 0.78  | 0.44  | 1.12  | 1.11  | 0.83  | 1.19  |
| Thailand                               | 0.88  | 0.47  | 1.31  | 3.07  | 2     | 4.16  | 1.21  | 1.90  | 0.95  |
| The Bahamas                            | 2.36  | 2.02  | 2.71  | 4.16  | 4.1   | 4.23  | 0.54  | 0.66  | 0.45  |
| The Gambia                             | 0.5   | 0.49  | 0.52  | 0.26  | 0.15  | 0.38  | -0.04 | -0.36 | 0.26  |
| Timor-Leste                            | 0.36  | 0.28  | 0.44  | 0.64  | 0.56  | 0.71  | 2.75  | 3.15  | 2.59  |
| Togo                                   | 0.69  | 0.66  | 0.73  | 0.43  | 0.21  | 0.65  | -0.14 | -0.49 | 0.12  |
| Tonga                                  | 0.94  | 0.26  | 1.61  | 1.52  | 0.46  | 2.57  | 0.46  | 0.61  | 0.43  |
| Trinidad and Tobago                    | 3.54  | 2.37  | 4.72  | 6.27  | 4.62  | 7.98  | 0.46  | 0.69  | 0.34  |
| Tunisia                                | 0.65  | 0.36  | 0.95  | 1.06  | 0.66  | 1.47  | 0.63  | 0.97  | 0.51  |
| Turkey                                 | 2.15  | 1.17  | 3.17  | 2.03  | 1.3   | 2.77  | 0.66  | 0.98  | 0.55  |
| Turkmenistan                           | 0.47  | 0.29  | 0.65  | 0.97  | 0.55  | 1.4   | 1.91  | 1.92  | 1.83  |
| Uganda                                 | 0.75  | 0.54  | 0.97  | 0.9   | 0.52  | 1.28  | 1.38  | 0.99  | 1.50  |
| Ukraine                                | 1.94  | 1.34  | 2.64  | 3.58  | 2.41  | 4.96  | 0.49  | 0.52  | 0.45  |
| United Arab Emirates                   | 0.7   | 0.28  | 0.92  | 1.22  | 0.41  | 1.52  | 1.40  | 1.61  | 1.16  |
| United Kingdom                         | 15.81 | 11.32 | 20.56 | 13.36 | 10.74 | 16.04 | 0.02  | 0.13  | -0.04 |
| United States                          | 6.35  | 4.19  | 8.61  | 4.11  | 3.28  | 4.98  | -0.33 | -0.22 | -0.38 |
| Uruguay                                | 8.04  | 5.61  | 10.61 | 9.6   | 7.91  | 11.4  | 0.08  | 0.12  | 0.10  |
| Uzbekistan                             | 0.28  | 0.19  | 0.36  | 0.4   | 0.26  | 0.55  | 0.70  | 0.73  | 0.66  |
| Vanuatu                                | 1.89  | 1.06  | 2.67  | 2.19  | 1.56  | 2.8   | 0.30  | 0.51  | 0.24  |
| Venezuela                              | 1.29  | 0.67  | 1.91  | 1.86  | 1.14  | 2.58  | 0.17  | 0.47  | 0.05  |
| Vietnam                                | 0.79  | 0.6   | 0.99  | 1.8   | 1.45  | 2.15  | 1.41  | 1.63  | 1.27  |
| Virgin Islands, U.S.                   | 2.41  | 1.5   | 3.38  | 5.12  | 3.55  | 6.84  | -0.01 | 0.11  | -0.06 |
| Yemen                                  | 0.39  | 0.24  | 0.54  | 0.59  | 0.35  | 0.82  | 2.17  | 2.13  | 2.17  |
| Zambia                                 | 0.61  | 0.51  | 0.72  | 1.15  | 0.59  | 1.72  | 1.72  | 0.81  | 2.21  |
| Zimbabwe                               | 0.4   | 0.24  | 0.56  | 0.71  | 0.29  | 1.14  | 0.47  | 0.03  | 0.63  |
| <b>Atrial fibrillation and flutter</b> |       |       |       |       |       |       |       |       |       |
| Afghanistan                            | 0.56  | 0.63  | 0.5   | 0.81  | 0.93  | 0.69  | 1.01  | 1.16  | 0.87  |
| Albania                                | 2.24  | 2.49  | 1.99  | 4.79  | 5.18  | 4.4   | 0.56  | 0.52  | 0.58  |
| Algeria                                | 0.82  | 0.92  | 0.73  | 1.86  | 1.91  | 1.82  | 1.45  | 1.24  | 1.72  |
| American Samoa                         | 0.86  | 0.94  | 0.78  | 0.62  | 0.79  | 0.44  | -0.10 | -0.17 | -0.15 |
| Andorra                                | 5.95  | 7.26  | 4.57  | 9.53  | 11.24 | 7.75  | 0.31  | 0.33  | 0.34  |
| Angola                                 | 0.25  | 0.25  | 0.25  | 0.27  | 0.25  | 0.29  | 1.15  | 0.92  | 1.42  |
| Antigua and Barbuda                    | 1.92  | 2.03  | 1.8   | 1.98  | 1.99  | 1.96  | 0.14  | 0.13  | 0.16  |
| Argentina                              | 3.14  | 3.25  | 3.02  | 4.15  | 4.7   | 3.58  | 0.30  | 0.27  | 0.28  |
| Armenia                                | 2.1   | 2.51  | 1.66  | 4.79  | 5.61  | 3.84  | 0.73  | 0.70  | 0.73  |
| Australia                              | 3.27  | 3.69  | 2.86  | 4.91  | 5.17  | 4.65  | 0.57  | 0.41  | 0.77  |

|                                  |      |       |      |       |       |       |       |       |       |
|----------------------------------|------|-------|------|-------|-------|-------|-------|-------|-------|
| Austria                          | 7.87 | 10.52 | 4.99 | 13.73 | 17.35 | 9.92  | 0.97  | 0.87  | 1.23  |
| Azerbaijan                       | 1.13 | 1.44  | 0.8  | 2.03  | 2.29  | 1.77  | 1.21  | 1.07  | 1.59  |
| Bahrain                          | 0.55 | 0.55  | 0.55 | 0.51  | 0.65  | 0.43  | 0.61  | 0.97  | 0.38  |
| Bangladesh                       | 0.44 | 0.36  | 0.51 | 0.91  | 0.65  | 1.16  | 2.53  | 2.47  | 2.50  |
| Barbados                         | 2.66 | 2.74  | 2.58 | 4.09  | 4.13  | 4.04  | 0.26  | 0.20  | 0.33  |
| Belarus                          | 3.61 | 4.83  | 2.23 | 5.39  | 7.13  | 3.37  | 0.08  | 0.15  | 0.02  |
| Belgium                          | 5.75 | 7.57  | 3.86 | 8.43  | 10.64 | 6.14  | 0.53  | 0.46  | 0.68  |
| Belize                           | 1.41 | 1.22  | 1.59 | 1.05  | 0.84  | 1.26  | -0.18 | -0.13 | -0.21 |
| Benin                            | 0.33 | 0.33  | 0.32 | 0.24  | 0.24  | 0.24  | 0.25  | 0.27  | 0.23  |
| Bermuda                          | 1.43 | 1.26  | 1.61 | 2.19  | 1.98  | 2.41  | 0.80  | 0.76  | 0.82  |
| Bhutan                           | 0.57 | 0.46  | 0.67 | 1.09  | 0.79  | 1.35  | 2.40  | 2.60  | 2.16  |
| Bolivia                          | 0.91 | 0.83  | 1    | 2.07  | 1.87  | 2.28  | 2.44  | 2.30  | 2.61  |
| Bosnia and Herzegovina           | 3.38 | 3.88  | 2.89 | 6.38  | 7.29  | 5.45  | 0.44  | 0.37  | 0.51  |
| Botswana                         | 0.21 | 0.21  | 0.2  | 0.29  | 0.28  | 0.29  | -0.07 | -0.08 | -0.05 |
| Brazil                           | 0.72 | 0.72  | 0.72 | 1.95  | 1.96  | 1.94  | 1.51  | 1.46  | 1.54  |
| Brunei                           | 0.46 | 0.31  | 0.59 | 0.69  | 0.5   | 0.87  | 0.36  | 0.44  | 0.33  |
| Bulgaria                         | 4.79 | 5.07  | 4.5  | 7.95  | 9.16  | 6.68  | 0.35  | 0.40  | 0.26  |
| Burkina Faso                     | 0.37 | 0.35  | 0.39 | 0.34  | 0.36  | 0.31  | 0.68  | 0.85  | 0.52  |
| Burundi                          | 0.41 | 0.37  | 0.44 | 0.36  | 0.3   | 0.41  | 1.01  | 0.93  | 1.08  |
| Cambodia                         | 0.73 | 0.88  | 0.57 | 1.14  | 1.23  | 1.05  | 2.00  | 1.83  | 2.40  |
| Cameroon                         | 0.42 | 0.38  | 0.46 | 0.35  | 0.31  | 0.39  | 0.04  | 0.04  | 0.03  |
| Canada                           | 3.11 | 3.44  | 2.78 | 4.92  | 5.25  | 4.59  | 0.44  | 0.29  | 0.60  |
| Cape Verde                       | 0.58 | 0.54  | 0.62 | 0.66  | 0.6   | 0.71  | 0.45  | 0.43  | 0.49  |
| Central African Republic         | 0.57 | 0.56  | 0.58 | 0.64  | 0.62  | 0.66  | 0.29  | 0.25  | 0.34  |
| Chad                             | 0.32 | 0.33  | 0.32 | 0.23  | 0.23  | 0.23  | 0.00  | -0.01 | 0.00  |
| Chile                            | 2.78 | 2.75  | 2.81 | 4.84  | 5.2   | 4.47  | 0.59  | 0.55  | 0.60  |
| China                            | 0.98 | 1.12  | 0.86 | 2.19  | 2.23  | 2.15  | 1.52  | 1.64  | 1.54  |
| Colombia                         | 0.94 | 0.88  | 1    | 1.68  | 1.59  | 1.77  | 0.94  | 0.81  | 1.04  |
| Comoros                          | 0.39 | 0.35  | 0.42 | 0.37  | 0.31  | 0.42  | 0.98  | 0.87  | 1.11  |
| Congo                            | 0.47 | 0.43  | 0.5  | 0.52  | 0.46  | 0.58  | 0.64  | 0.34  | 1.03  |
| Costa Rica                       | 1.2  | 1.08  | 1.31 | 2.35  | 2.15  | 2.55  | 0.57  | 0.56  | 0.59  |
| Cote d'Ivoire                    | 0.25 | 0.21  | 0.29 | 0.23  | 0.17  | 0.29  | 0.23  | 0.14  | 0.30  |
| Croatia                          | 3.5  | 4.2   | 2.75 | 5.29  | 6.29  | 4.2   | 0.33  | 0.23  | 0.43  |
| Cuba                             | 2.49 | 2.11  | 2.87 | 4.31  | 4.01  | 4.6   | 0.27  | 0.33  | 0.22  |
| Cyprus                           | 5.99 | 6.59  | 5.38 | 6.21  | 7.12  | 5.23  | 0.38  | 0.51  | 0.24  |
| Czech Republic                   | 5.54 | 6.91  | 4.09 | 9     | 10.78 | 7.16  | 0.95  | 0.81  | 1.17  |
| Democratic Republic of the Congo | 0.34 | 0.36  | 0.32 | 0.49  | 0.47  | 0.51  | 1.23  | 1.09  | 1.42  |
| Denmark                          | 4.56 | 5.86  | 3.23 | 6.44  | 7.84  | 5.02  | 0.77  | 0.66  | 0.97  |
| Djibouti                         | 0.31 | 0.28  | 0.34 | 0.51  | 0.41  | 0.6   | 0.83  | 0.74  | 0.94  |
| Dominica                         | 1.95 | 1.69  | 2.22 | 2.9   | 2.69  | 3.11  | 0.12  | 0.37  | -0.05 |
| Dominican Republic               | 0.98 | 0.77  | 1.18 | 1.97  | 1.66  | 2.28  | 0.74  | 0.84  | 0.68  |
| Ecuador                          | 1.02 | 0.89  | 1.15 | 1.82  | 1.61  | 2.03  | 0.78  | 0.82  | 0.75  |
| Egypt                            | 1.21 | 1.48  | 0.94 | 1.35  | 1.61  | 1.09  | 0.56  | 0.65  | 0.52  |
| El Salvador                      | 1.08 | 0.97  | 1.2  | 2.45  | 2.09  | 2.86  | 1.41  | 1.19  | 1.59  |
| Equatorial Guinea                | 0.72 | 0.69  | 0.75 | 0.31  | 0.26  | 0.37  | -0.09 | -0.20 | 0.00  |
| Eritrea                          | 0.19 | 0.21  | 0.16 | 0.29  | 0.32  | 0.27  | 1.48  | 1.31  | 1.72  |
| Estonia                          | 3.94 | 5.33  | 2.35 | 7.08  | 9.37  | 4.38  | 0.92  | 0.77  | 1.12  |
| Ethiopia                         | 0.39 | 0.3   | 0.48 | 0.45  | 0.34  | 0.55  | 2.37  | 2.29  | 2.45  |
| Federated States of Micronesia   | 1.1  | 1.06  | 1.14 | 1.46  | 1.51  | 1.42  | 0.51  | 0.57  | 0.45  |
| Fiji                             | 0.62 | 0.59  | 0.64 | 1.13  | 1.17  | 1.08  | 0.27  | 0.28  | 0.25  |
| Finland                          | 7.97 | 10.83 | 4.93 | 15.39 | 20.05 | 10.58 | 0.99  | 0.87  | 1.25  |
| France                           | 7.88 | 10.29 | 5.35 | 12.1  | 15.33 | 8.67  | 0.48  | 0.41  | 0.59  |
| Gabon                            | 0.67 | 0.61  | 0.74 | 0.71  | 0.64  | 0.77  | 0.67  | 0.58  | 0.76  |
| Georgia                          | 2.81 | 3.57  | 1.97 | 6.15  | 7.58  | 4.59  | 0.69  | 0.78  | 0.68  |
| Germany                          | 8.2  | 11.03 | 5.15 | 12.02 | 14.86 | 9.08  | 0.50  | 0.42  | 0.75  |
| Ghana                            | 0.21 | 0.23  | 0.2  | 0.34  | 0.39  | 0.28  | 1.38  | 1.79  | 1.02  |
| Greece                           | 5.66 | 6.34  | 4.96 | 11.07 | 12.89 | 9.17  | 0.61  | 0.62  | 0.56  |
| Greenland                        | 0.63 | 0.66  | 0.6  | 1     | 0.84  | 1.14  | 0.89  | 0.67  | 1.12  |
| Grenada                          | 1.92 | 1.93  | 1.9  | 2.28  | 2.45  | 2.12  | 0.18  | 0.25  | 0.11  |
| Guam                             | 0.81 | 0.91  | 0.72 | 1.84  | 1.93  | 1.75  | 0.19  | 0.05  | 0.30  |
| Guatemala                        | 0.73 | 0.61  | 0.86 | 1.39  | 1.23  | 1.55  | 1.80  | 1.95  | 1.69  |
| Guinea                           | 0.27 | 0.26  | 0.29 | 0.27  | 0.25  | 0.3   | 0.67  | 0.66  | 0.67  |
| Guinea-Bissau                    | 0.33 | 0.31  | 0.34 | 0.27  | 0.24  | 0.3   | 0.18  | 0.10  | 0.26  |
| Guyana                           | 1.36 | 1.16  | 1.57 | 1.03  | 0.89  | 1.18  | -0.26 | -0.22 | -0.28 |
| Haiti                            | 1.02 | 0.94  | 1.11 | 1.4   | 1.33  | 1.47  | 1.23  | 1.27  | 1.21  |
| Honduras                         | 0.89 | 0.8   | 0.99 | 1.72  | 1.5   | 1.93  | 1.00  | 0.81  | 1.20  |
| Hungary                          | 4.36 | 5.31  | 3.32 | 6.33  | 8.12  | 4.36  | 0.68  | 0.62  | 0.66  |
| Iceland                          | 7.87 | 8.51  | 7.22 | 11.14 | 11.99 | 10.27 | 0.64  | 0.78  | 0.53  |
| India                            | 0.69 | 0.61  | 0.77 | 1.28  | 1.08  | 1.47  | 1.55  | 1.70  | 1.42  |
| Indonesia                        | 0.7  | 0.7   | 0.7  | 1.05  | 1.1   | 1     | 0.84  | 1.02  | 0.69  |

|                                  |       |       |      |       |       |       |       |       |       |
|----------------------------------|-------|-------|------|-------|-------|-------|-------|-------|-------|
| Iran                             | 0.66  | 0.61  | 0.7  | 1.4   | 1.25  | 1.55  | 1.92  | 2.19  | 1.80  |
| Iraq                             | 1     | 1.12  | 0.88 | 0.78  | 0.91  | 0.66  | -0.04 | 0.10  | -0.16 |
| Ireland                          | 4.9   | 5.68  | 4.1  | 5.08  | 5.78  | 4.36  | 0.32  | 0.36  | 0.29  |
| Israel                           | 4.15  | 4.57  | 3.73 | 6.22  | 7.53  | 4.9   | 0.62  | 0.69  | 0.48  |
| Italy                            | 6.34  | 7.9   | 4.68 | 11.93 | 14.55 | 9.15  | 0.66  | 0.51  | 0.84  |
| Jamaica                          | 2.49  | 2.33  | 2.65 | 3.53  | 3.25  | 3.81  | 0.10  | 0.15  | 0.07  |
| Japan                            | 2.23  | 1.91  | 2.56 | 6.35  | 5.71  | 7.03  | 0.75  | 0.76  | 0.74  |
| Jordan                           | 1.07  | 1.02  | 1.1  | 0.94  | 0.98  | 0.89  | 0.50  | 0.87  | 0.25  |
| Kazakhstan                       | 1.84  | 2.54  | 1.1  | 1.97  | 2.54  | 1.37  | 0.07  | 0.09  | 0.14  |
| Kenya                            | 0.28  | 0.24  | 0.32 | 0.34  | 0.28  | 0.4   | 0.57  | 0.60  | 0.53  |
| Kiribati                         | 1.11  | 1.32  | 0.89 | 1.31  | 1.61  | 1     | 0.49  | 0.70  | 0.31  |
| Kuwait                           | 0.29  | 0.3   | 0.29 | 0.3   | 0.28  | 0.33  | 0.40  | 0.25  | 0.57  |
| Kyrgyzstan                       | 1.79  | 2.35  | 1.2  | 1.98  | 2.36  | 1.6   | 0.44  | 0.47  | 0.57  |
| Laos                             | 0.88  | 0.95  | 0.81 | 0.94  | 0.97  | 0.92  | 1.62  | 1.66  | 1.63  |
| Latvia                           | 4.19  | 5.53  | 2.65 | 6.49  | 8.67  | 3.95  | 0.57  | 0.55  | 0.56  |
| Lebanon                          | 1.61  | 1.76  | 1.46 | 2.12  | 2.4   | 1.84  | 0.94  | 0.76  | 1.09  |
| Lesotho                          | 0.42  | 0.41  | 0.44 | 0.52  | 0.56  | 0.48  | -0.31 | -0.27 | -0.34 |
| Liberia                          | 0.23  | 0.19  | 0.27 | 0.26  | 0.22  | 0.3   | 1.65  | 1.48  | 1.84  |
| Libya                            | 0.56  | 0.62  | 0.51 | 1.16  | 1.29  | 1.03  | 0.72  | 0.92  | 0.55  |
| Lithuania                        | 3.77  | 4.65  | 2.78 | 6.3   | 8.19  | 4.1   | 0.45  | 0.51  | 0.29  |
| Luxembourg                       | 6.47  | 8.64  | 4.21 | 8.16  | 10.69 | 5.63  | 0.91  | 0.77  | 1.14  |
| Macedonia                        | 3.36  | 3.46  | 3.27 | 5.53  | 6.22  | 4.84  | 0.40  | 0.48  | 0.30  |
| Madagascar                       | 0.53  | 0.43  | 0.64 | 0.57  | 0.46  | 0.68  | 0.80  | 0.86  | 0.76  |
| Malawi                           | 0.25  | 0.21  | 0.29 | 0.36  | 0.32  | 0.41  | 1.84  | 2.04  | 1.67  |
| Malaysia                         | 0.8   | 0.73  | 0.87 | 0.99  | 0.75  | 1.24  | 0.15  | 0.13  | 0.17  |
| Maldives                         | 0.64  | 0.44  | 0.83 | 1.28  | 0.95  | 1.62  | 3.65  | 5.21  | 2.85  |
| Mali                             | 0.34  | 0.31  | 0.37 | 0.24  | 0.22  | 0.26  | 0.30  | 0.30  | 0.29  |
| Malta                            | 4.39  | 5.17  | 3.58 | 7.15  | 9.05  | 5.23  | 0.41  | 0.45  | 0.33  |
| Marshall Islands                 | 0.71  | 0.73  | 0.7  | 0.96  | 0.96  | 0.96  | 0.33  | 0.23  | 0.43  |
| Mauritania                       | 0.25  | 0.25  | 0.26 | 0.25  | 0.25  | 0.25  | 0.85  | 0.82  | 0.89  |
| Mauritius                        | 0.9   | 1.1   | 0.71 | 2.08  | 2.3   | 1.85  | 0.83  | 0.56  | 1.19  |
| Mexico                           | 1.07  | 0.97  | 1.17 | 1.9   | 1.79  | 2.02  | 0.71  | 0.67  | 0.74  |
| Moldova                          | 2.52  | 3.08  | 1.9  | 4.29  | 5.27  | 3.23  | 0.80  | 0.86  | 0.75  |
| Mongolia                         | 1.38  | 1.51  | 1.26 | 1.35  | 1.57  | 1.13  | 0.15  | 0.44  | -0.05 |
| Montenegro                       | 7.09  | 8.59  | 5.58 | 11.49 | 12.56 | 10.41 | 0.32  | 0.33  | 0.37  |
| Morocco                          | 0.98  | 1.11  | 0.85 | 1.92  | 2.09  | 1.75  | 1.22  | 1.10  | 1.39  |
| Mozambique                       | 0.34  | 0.31  | 0.38 | 0.41  | 0.36  | 0.47  | 0.86  | 0.81  | 0.91  |
| Myanmar                          | 1.57  | 2.16  | 0.95 | 1.95  | 2.54  | 1.34  | 0.80  | 0.86  | 0.91  |
| Namibia                          | 0.29  | 0.29  | 0.29 | 0.33  | 0.31  | 0.36  | 0.32  | 0.28  | 0.38  |
| Nepal                            | 0.55  | 0.51  | 0.59 | 0.91  | 0.68  | 1.16  | 1.91  | 1.61  | 2.11  |
| Netherlands                      | 8.96  | 11.59 | 6.26 | 12.65 | 15.64 | 9.61  | 0.43  | 0.32  | 0.62  |
| New Zealand                      | 5.92  | 7.42  | 4.37 | 8.65  | 10.21 | 7.04  | 0.63  | 0.46  | 0.87  |
| Nicaragua                        | 0.72  | 0.67  | 0.76 | 1.75  | 1.6   | 1.9   | 1.86  | 1.79  | 1.92  |
| Niger                            | 0.15  | 0.14  | 0.15 | 0.18  | 0.17  | 0.19  | 1.63  | 1.62  | 1.64  |
| Nigeria                          | 0.22  | 0.19  | 0.24 | 0.16  | 0.13  | 0.19  | 0.33  | 0.27  | 0.39  |
| North Korea                      | 0.99  | 1.42  | 0.54 | 2.65  | 3.72  | 1.53  | 1.00  | 1.02  | 1.05  |
| Northern Mariana Islands         | 0.39  | 0.5   | 0.3  | 0.34  | 0.35  | 0.32  | 0.21  | 0.24  | 0.29  |
| Norway                           | 10.19 | 12.25 | 8.08 | 12.15 | 14.69 | 9.64  | 0.59  | 0.45  | 0.75  |
| Oman                             | 0.53  | 0.68  | 0.4  | 0.57  | 0.85  | 0.42  | 0.72  | 1.09  | 0.65  |
| Pakistan                         | 1.04  | 0.55  | 1.5  | 1.08  | 0.61  | 1.52  | 0.32  | 0.52  | 0.23  |
| Palestine                        | 0.57  | 0.63  | 0.52 | 0.79  | 0.88  | 0.7   | 0.81  | 1.08  | 0.63  |
| Panama                           | 1.25  | 1.08  | 1.41 | 2.07  | 1.81  | 2.34  | 0.41  | 0.41  | 0.41  |
| Papua New Guinea                 | 0.47  | 0.57  | 0.37 | 0.56  | 0.65  | 0.48  | 0.43  | 0.30  | 0.62  |
| Paraguay                         | 0.89  | 0.84  | 0.94 | 1.61  | 1.46  | 1.76  | 0.40  | 0.45  | 0.37  |
| Peru                             | 0.84  | 0.76  | 0.92 | 1.74  | 1.66  | 1.81  | 2.14  | 2.15  | 2.15  |
| Philippines                      | 0.7   | 0.71  | 0.69 | 0.99  | 1.07  | 0.9   | 0.50  | 0.60  | 0.40  |
| Poland                           | 4.88  | 6.12  | 3.57 | 8.71  | 11.01 | 6.22  | 0.84  | 0.83  | 0.82  |
| Portugal                         | 6.58  | 8.04  | 5.02 | 10.3  | 12.48 | 7.96  | 0.67  | 0.65  | 0.70  |
| Puerto Rico                      | 2.45  | 2.1   | 2.82 | 4.04  | 4.1   | 3.96  | 0.40  | 0.40  | 0.38  |
| Qatar                            | 0.35  | 0.44  | 0.31 | 0.19  | 0.27  | 0.16  | -0.03 | 0.20  | -0.08 |
| Romania                          | 3     | 3.45  | 2.53 | 5.01  | 6.01  | 3.94  | 0.35  | 0.40  | 0.26  |
| Russia                           | 3.08  | 4.39  | 1.58 | 4.87  | 6.37  | 3.11  | 0.30  | 0.27  | 0.51  |
| Rwanda                           | 0.31  | 0.3   | 0.32 | 0.41  | 0.36  | 0.46  | 2.01  | 1.81  | 2.21  |
| Saint Lucia                      | 1.82  | 1.69  | 1.95 | 3.16  | 3.05  | 3.26  | 0.62  | 0.64  | 0.62  |
| Saint Vincent and the Grenadines | 1.83  | 1.83  | 1.82 | 2.19  | 2.09  | 2.29  | 0.00  | 0.05  | -0.05 |
| Samoa                            | 0.98  | 1.06  | 0.89 | 1.65  | 1.89  | 1.44  | 0.61  | 0.33  | 0.88  |
| Sao Tome and Principe            | 0.53  | 0.5   | 0.57 | 0.51  | 0.42  | 0.6   | 0.54  | 0.31  | 0.78  |
| Saudi Arabia                     | 0.58  | 0.68  | 0.49 | 0.75  | 0.85  | 0.68  | 1.16  | 1.44  | 1.06  |
| Senegal                          | 0.24  | 0.23  | 0.24 | 0.28  | 0.27  | 0.29  | 1.06  | 1.01  | 1.13  |
| Serbia                           | 3.65  | 4.23  | 3.07 | 5.99  | 7.07  | 4.85  | 0.26  | 0.25  | 0.25  |



|                                       |       |       |       |       |       |       |       |       |       |
|---------------------------------------|-------|-------|-------|-------|-------|-------|-------|-------|-------|
| Seychelles                            | 2.05  | 2.27  | 1.83  | 1.83  | 2.14  | 1.52  | -0.02 | 0.01  | -0.06 |
| Sierra Leone                          | 0.2   | 0.15  | 0.25  | 0.17  | 0.14  | 0.2   | 0.35  | 0.38  | 0.38  |
| Singapore                             | 1.14  | 0.84  | 1.42  | 2.46  | 1.85  | 3.09  | 0.88  | 0.73  | 1.05  |
| Slovakia                              | 4.74  | 5.71  | 3.74  | 7.93  | 10.3  | 5.43  | 0.94  | 0.91  | 0.82  |
| Slovenia                              | 3.9   | 4.91  | 2.83  | 7.66  | 9.55  | 5.73  | 0.96  | 0.82  | 1.16  |
| Solomon Islands                       | 0.85  | 0.66  | 1.04  | 1.01  | 0.86  | 1.16  | 0.38  | 0.47  | 0.35  |
| Somalia                               | 0.4   | 0.35  | 0.44  | 0.34  | 0.29  | 0.4   | 0.26  | 0.20  | 0.32  |
| South Africa                          | 0.52  | 0.53  | 0.52  | 0.75  | 0.82  | 0.67  | 0.22  | 0.37  | 0.07  |
| South Korea                           | 0.88  | 0.9   | 0.86  | 2.78  | 2.69  | 2.88  | 1.76  | 1.55  | 1.97  |
| South Sudan                           | 0.25  | 0.22  | 0.28  | 0.34  | 0.28  | 0.4   | 1.03  | 0.92  | 1.13  |
| Spain                                 | 6.89  | 8.76  | 4.95  | 11.48 | 14.47 | 8.41  | 0.69  | 0.59  | 0.82  |
| Sri Lanka                             | 1.7   | 1.47  | 1.91  | 2.22  | 2.25  | 2.2   | 0.40  | 0.46  | 0.29  |
| Sudan                                 | 0.99  | 1.07  | 0.92  | 1.06  | 1.14  | 0.98  | 0.87  | 0.93  | 0.84  |
| Suriname                              | 1.24  | 1.17  | 1.31  | 1.8   | 1.8   | 1.81  | 0.33  | 0.47  | 0.22  |
| Swaziland                             | 0.23  | 0.21  | 0.24  | 0.31  | 0.3   | 0.33  | -0.11 | -0.13 | -0.08 |
| Sweden                                | 12.49 | 13.07 | 11.9  | 19.74 | 21.25 | 18.23 | 0.86  | 0.79  | 0.92  |
| Switzerland                           | 4.82  | 6.09  | 3.5   | 6.37  | 7.87  | 4.83  | 0.55  | 0.44  | 0.71  |
| Syria                                 | 1.52  | 1.59  | 1.46  | 1.97  | 2.17  | 1.77  | -0.02 | 0.38  | -0.23 |
| Taiwan                                | 1.4   | 1.42  | 1.38  | 3.31  | 2.98  | 3.65  | 0.78  | 0.57  | 0.97  |
| Tajikistan                            | 1.4   | 1.6   | 1.18  | 1.31  | 1.29  | 1.32  | 0.74  | 0.61  | 0.96  |
| Tanzania                              | 0.28  | 0.24  | 0.32  | 0.38  | 0.26  | 0.5   | 1.29  | 0.89  | 1.56  |
| Thailand                              | 1.45  | 1.52  | 1.37  | 2.82  | 2.78  | 2.87  | 0.24  | 0.24  | 0.27  |
| The Bahamas                           | 0.86  | 0.87  | 0.84  | 1.87  | 1.98  | 1.76  | 0.89  | 0.83  | 0.92  |
| The Gambia                            | 0.22  | 0.19  | 0.26  | 0.22  | 0.17  | 0.26  | 0.75  | 0.89  | 0.67  |
| Timor-Leste                           | 0.4   | 0.44  | 0.36  | 0.88  | 0.94  | 0.81  | 3.55  | 3.39  | 3.75  |
| Togo                                  | 0.29  | 0.28  | 0.3   | 0.24  | 0.21  | 0.26  | 0.15  | 0.18  | 0.12  |
| Tonga                                 | 1.35  | 1.42  | 1.29  | 2.3   | 2.69  | 1.91  | 0.55  | 0.76  | 0.33  |
| Trinidad and Tobago                   | 1.25  | 1.23  | 1.28  | 1.84  | 1.93  | 1.74  | 0.21  | 0.37  | 0.08  |
| Tunisia                               | 1.31  | 1.37  | 1.26  | 2.44  | 2.64  | 2.24  | 0.85  | 1.01  | 0.71  |
| Turkey                                | 1.93  | 2.24  | 1.6   | 2.17  | 2.55  | 1.78  | 0.96  | 1.01  | 0.91  |
| Turkmenistan                          | 1.19  | 1.5   | 0.88  | 1.37  | 1.66  | 1.08  | 0.62  | 0.68  | 0.62  |
| Uganda                                | 0.35  | 0.3   | 0.4   | 0.38  | 0.31  | 0.45  | 1.10  | 1.10  | 1.08  |
| Ukraine                               | 3.82  | 5.11  | 2.32  | 6.53  | 8.36  | 4.37  | 0.38  | 0.38  | 0.46  |
| United Arab Emirates                  | 0.21  | 0.26  | 0.18  | 0.23  | 0.27  | 0.22  | 0.43  | 0.84  | 0.45  |
| United Kingdom                        | 5.44  | 7.34  | 3.43  | 10.08 | 13.15 | 6.94  | 1.25  | 1.15  | 1.49  |
| United States                         | 4.57  | 5.79  | 3.3   | 7.14  | 8.9   | 5.32  | 0.61  | 0.53  | 0.72  |
| Uruguay                               | 4.32  | 4.58  | 4.04  | 6.3   | 7.55  | 4.97  | 0.32  | 0.31  | 0.26  |
| Uzbekistan                            | 1.52  | 1.85  | 1.18  | 1.74  | 2.06  | 1.42  | 0.34  | 0.39  | 0.33  |
| Vanuatu                               | 1.21  | 0.92  | 1.48  | 1.05  | 0.93  | 1.16  | -0.06 | 0.03  | -0.10 |
| Venezuela                             | 0.74  | 0.69  | 0.78  | 1.4   | 1.4   | 1.4   | 0.55  | 0.76  | 0.39  |
| Vietnam                               | 1.93  | 2.32  | 1.52  | 2.96  | 3.57  | 2.34  | 0.61  | 0.64  | 0.60  |
| Virgin Islands, U.S.                  | 1.02  | 0.99  | 1.05  | 3.71  | 3.54  | 3.89  | 0.70  | 0.67  | 0.72  |
| Yemen                                 | 0.78  | 0.92  | 0.63  | 0.84  | 0.9   | 0.79  | 1.07  | 0.93  | 1.32  |
| Zambia                                | 0.26  | 0.24  | 0.28  | 0.32  | 0.29  | 0.36  | 0.75  | 0.84  | 0.69  |
| Zimbabwe                              | 0.4   | 0.38  | 0.42  | 0.57  | 0.51  | 0.63  | 0.19  | 0.14  | 0.24  |
| <b>Cardiomyopathy and myocarditis</b> |       |       |       |       |       |       |       |       |       |
| Afghanistan                           | 4.07  | 4.98  | 3.2   | 4.35  | 5.18  | 3.57  | 0.52  | 0.53  | 0.56  |
| Albania                               | 11.2  | 12.08 | 10.36 | 20.71 | 20.06 | 21.36 | 0.34  | 0.22  | 0.48  |
| Algeria                               | 8.52  | 8.2   | 8.83  | 7.55  | 6.91  | 8.19  | -0.02 | -0.07 | 0.04  |
| American Samoa                        | 5.36  | 5     | 5.69  | 5.92  | 5.3   | 6.53  | 0.39  | 0.06  | 0.72  |
| Andorra                               | 6.46  | 6.63  | 6.28  | 6.4   | 5.9   | 6.93  | -0.17 | -0.20 | -0.10 |
| Angola                                | 4.23  | 4.24  | 4.22  | 3.39  | 3.35  | 3.44  | 0.61  | 0.50  | 0.75  |
| Antigua and Barbuda                   | 6.59  | 7.92  | 5.17  | 6.83  | 6.65  | 7.03  | 0.15  | -0.03 | 0.46  |
| Argentina                             | 23.82 | 19.75 | 28.05 | 9.28  | 8.18  | 10.44 | -0.62 | -0.64 | -0.60 |
| Armenia                               | 1.48  | 1.23  | 1.75  | 2.47  | 1.98  | 3.04  | 0.27  | 0.24  | 0.31  |
| Australia                             | 8.22  | 6.8   | 9.64  | 5.06  | 3.79  | 6.34  | -0.35 | -0.44 | -0.28 |
| Austria                               | 53.89 | 69.1  | 37.31 | 19.96 | 22.78 | 17    | -0.58 | -0.62 | -0.49 |
| Azerbaijan                            | 2.62  | 1.73  | 3.55  | 3.08  | 1.6   | 4.58  | 0.43  | 0.21  | 0.51  |
| Bahrain                               | 2.86  | 2.37  | 3.22  | 1.97  | 1.59  | 2.2   | 0.19  | 0.11  | 0.22  |
| Bangladesh                            | 0.46  | 0.43  | 0.49  | 0.62  | 0.62  | 0.62  | 1.32  | 1.80  | 1.02  |
| Barbados                              | 9.07  | 9.63  | 8.45  | 9.97  | 8.32  | 11.76 | -0.10 | -0.31 | 0.18  |
| Belarus                               | 9.4   | 5.41  | 13.92 | 19.44 | 8.8   | 31.79 | 0.51  | 0.29  | 0.56  |
| Belgium                               | 14.64 | 17.11 | 12.06 | 11.14 | 12.6  | 9.62  | -0.20 | -0.23 | -0.15 |
| Belize                                | 5.2   | 6.69  | 3.73  | 5.19  | 5.05  | 5.33  | 0.10  | -0.05 | 0.42  |
| Benin                                 | 1.58  | 1.38  | 1.8   | 1.33  | 0.9   | 1.75  | 0.41  | 0.13  | 0.60  |
| Bermuda                               | 7.16  | 6.46  | 7.87  | 6.66  | 5.15  | 8.21  | 0.10  | -0.11 | 0.27  |
| Bhutan                                | 0.59  | 0.57  | 0.61  | 0.85  | 0.79  | 0.91  | 1.61  | 1.97  | 1.40  |
| Bolivia                               | 4.48  | 4.55  | 4.4   | 3.47  | 3.68  | 3.26  | 0.19  | 0.21  | 0.20  |
| Bosnia and Herzegovina                | 25.59 | 29.65 | 21.53 | 82.62 | 95.27 | 69.86 | 1.47  | 1.35  | 1.52  |
| Botswana                              | 5.51  | 5.97  | 5.05  | 8.33  | 7.9   | 8.76  | -0.01 | -0.09 | 0.10  |

|                                  |       |       |       |       |       |       |       |       |       |
|----------------------------------|-------|-------|-------|-------|-------|-------|-------|-------|-------|
| Brazil                           | 6.87  | 5.98  | 7.77  | 9.31  | 7.68  | 11    | 0.26  | 0.16  | 0.34  |
| Brunei                           | 2.99  | 2.2   | 3.7   | 3.24  | 2.2   | 4.23  | -0.02 | -0.09 | 0.03  |
| Bulgaria                         | 11.16 | 11.34 | 10.98 | 33.99 | 37.23 | 30.58 | 1.48  | 1.54  | 1.37  |
| Burkina Faso                     | 1.9   | 1.7   | 2.1   | 1.53  | 1.24  | 1.82  | 0.49  | 0.30  | 0.63  |
| Burundi                          | 3.87  | 3.43  | 4.32  | 1.69  | 1.45  | 1.94  | 0.02  | 0.02  | 0.04  |
| Cambodia                         | 3.78  | 3.78  | 3.77  | 2.48  | 2.23  | 2.74  | 0.30  | 0.25  | 0.38  |
| Cameroon                         | 2.12  | 1.8   | 2.45  | 1.74  | 1.19  | 2.29  | 0.00  | -0.18 | 0.11  |
| Canada                           | 3.88  | 2.73  | 5.05  | 3.31  | 2.35  | 4.29  | -0.22 | -0.27 | -0.17 |
| Cape Verde                       | 0.93  | 0.42  | 1.5   | 0.99  | 0.53  | 1.46  | 0.38  | 0.63  | 0.29  |
| Central African Republic         | 4.43  | 3.96  | 4.91  | 4.55  | 3.73  | 5.4   | 0.16  | 0.04  | 0.24  |
| Chad                             | 1.45  | 1.37  | 1.53  | 1.26  | 0.97  | 1.56  | 0.25  | 0.03  | 0.44  |
| Chile                            | 4.02  | 3.49  | 4.56  | 5.05  | 3.76  | 6.38  | 0.15  | -0.11 | 0.41  |
| China                            | 1.35  | 1.13  | 1.56  | 2.06  | 1.77  | 2.33  | 0.73  | 1.06  | 0.54  |
| Colombia                         | 2.47  | 2.12  | 2.82  | 2.11  | 1.84  | 2.4   | -0.07 | -0.13 | -0.01 |
| Comoros                          | 2.79  | 2.36  | 3.21  | 1.53  | 1.28  | 1.78  | 0.14  | 0.12  | 0.17  |
| Congo                            | 4.48  | 4.21  | 4.76  | 3.64  | 4.05  | 3.22  | 0.19  | 0.19  | 0.18  |
| Costa Rica                       | 1.67  | 1.45  | 1.88  | 4.06  | 3.35  | 4.76  | 0.96  | 0.82  | 1.07  |
| Cote d'Ivoire                    | 2.07  | 1.5   | 2.59  | 1.63  | 0.98  | 2.25  | 0.03  | -0.12 | 0.10  |
| Croatia                          | 9.68  | 10.64 | 8.66  | 20.04 | 23.56 | 16.27 | 0.82  | 0.82  | 0.76  |
| Cuba                             | 2.54  | 2.97  | 2.13  | 7.38  | 6.75  | 8     | 1.14  | 0.60  | 1.88  |
| Cyprus                           | 7.07  | 6.98  | 7.16  | 4.17  | 3.66  | 4.73  | -0.20 | -0.24 | -0.13 |
| Czech Republic                   | 6.32  | 5.87  | 6.79  | 6.71  | 6.12  | 7.33  | 0.27  | 0.21  | 0.34  |
| Democratic Republic of the Congo | 2.53  | 2.67  | 2.38  | 2.34  | 2.18  | 2.51  | 0.43  | 0.29  | 0.61  |
| Denmark                          | 5.55  | 5.55  | 5.55  | 5.05  | 4.4   | 5.71  | 0.14  | -0.01 | 0.30  |
| Djibouti                         | 2.46  | 1.83  | 3.07  | 2.84  | 1.9   | 3.77  | 0.28  | 0.19  | 0.33  |
| Dominica                         | 11.24 | 11.57 | 10.91 | 18.77 | 13.27 | 24.35 | 0.26  | -0.02 | 0.52  |
| Dominican Republic               | 4.31  | 4.99  | 3.63  | 2.87  | 3.73  | 2     | -0.42 | -0.36 | -0.49 |
| Ecuador                          | 2.63  | 2.46  | 2.8   | 1.72  | 1.41  | 2.03  | -0.34 | -0.42 | -0.26 |
| Egypt                            | 17.18 | 15.66 | 18.69 | 14.21 | 12.83 | 15.57 | 0.16  | 0.24  | 0.10  |
| El Salvador                      | 3.71  | 3.14  | 4.3   | 1.21  | 0.76  | 1.72  | -0.64 | -0.75 | -0.52 |
| Equatorial Guinea                | 5.53  | 5.36  | 5.68  | 3.71  | 3.22  | 4.18  | 0.38  | 0.26  | 0.50  |
| Eritrea                          | 2.14  | 1.9   | 2.38  | 1.94  | 1.86  | 2.02  | 0.41  | 0.45  | 0.38  |
| Estonia                          | 15.53 | 8.66  | 23.34 | 14.85 | 7.4   | 23.61 | 0.02  | -0.14 | 0.16  |
| Ethiopia                         | 2.77  | 2.28  | 3.25  | 1.55  | 1.23  | 1.87  | 0.66  | 0.57  | 0.73  |
| Federated States of Micronesia   | 6.13  | 5.99  | 6.26  | 7.11  | 6.43  | 7.77  | 0.30  | 0.17  | 0.43  |
| Fiji                             | 3.84  | 3.6   | 4.06  | 8.97  | 8.25  | 9.66  | 0.65  | 0.49  | 0.81  |
| Finland                          | 6.86  | 7.03  | 6.68  | 10.93 | 6.45  | 15.56 | 0.64  | -0.07 | 1.45  |
| France                           | 11.53 | 12.04 | 10.98 | 11.44 | 11.78 | 11.08 | -0.04 | -0.07 | -0.01 |
| Gabon                            | 5.28  | 4.3   | 6.3   | 4.04  | 3.7   | 4.38  | 0.20  | 0.28  | 0.13  |
| Georgia                          | 4.19  | 3.6   | 4.84  | 7     | 4.37  | 9.87  | 0.30  | 0.03  | 0.50  |
| Germany                          | 19.56 | 23.09 | 15.77 | 14.85 | 14.42 | 15.3  | -0.22 | -0.34 | -0.04 |
| Ghana                            | 2.63  | 3.3   | 1.99  | 3.68  | 3.89  | 3.46  | 1.05  | 0.85  | 1.40  |
| Greece                           | 17.87 | 21.41 | 14.23 | 14.58 | 17.85 | 11.15 | -0.33 | -0.34 | -0.34 |
| Greenland                        | 7.75  | 3.89  | 11.08 | 8.66  | 3.03  | 13.53 | 0.33  | 0.03  | 0.37  |
| Grenada                          | 11.15 | 14.08 | 8.14  | 11.99 | 12.23 | 11.75 | 0.07  | -0.14 | 0.44  |
| Guam                             | 4.3   | 4.68  | 3.96  | 8.19  | 6.82  | 9.52  | 0.00  | -0.28 | 0.30  |
| Guatemala                        | 3.25  | 2.8   | 3.69  | 0.95  | 0.8   | 1.11  | -0.57 | -0.59 | -0.55 |
| Guinea                           | 1.7   | 1.79  | 1.61  | 1.31  | 0.97  | 1.64  | 0.28  | -0.05 | 0.62  |
| Guinea-Bissau                    | 2.21  | 2.02  | 2.4   | 1.82  | 1.45  | 2.2   | 0.18  | 0.01  | 0.32  |
| Guyana                           | 7.45  | 8.09  | 6.8   | 8.29  | 7.32  | 9.25  | 0.09  | -0.08 | 0.30  |
| Haiti                            | 8.76  | 11.11 | 6.34  | 6.2   | 7.18  | 5.2   | 0.16  | 0.04  | 0.38  |
| Honduras                         | 3.29  | 2.97  | 3.62  | 3.07  | 2.55  | 3.59  | -0.01 | -0.17 | 0.18  |
| Hungary                          | 28.47 | 27.13 | 29.92 | 20.75 | 17.23 | 24.63 | -0.16 | -0.33 | 0.04  |
| Iceland                          | 3.66  | 3.38  | 3.93  | 2.61  | 2.07  | 3.17  | -0.17 | -0.22 | -0.13 |
| India                            | 0.67  | 0.57  | 0.76  | 1.14  | 1.03  | 1.24  | 1.35  | 1.78  | 1.07  |
| Indonesia                        | 2.11  | 1.78  | 2.43  | 2.46  | 2.17  | 2.75  | 0.44  | 0.58  | 0.35  |
| Iran                             | 2.22  | 1.83  | 2.6   | 3.12  | 2.18  | 4.04  | 0.95  | 0.90  | 1.00  |
| Iraq                             | 5.21  | 4.24  | 6.16  | 4.22  | 3.13  | 5.29  | 0.00  | 0.02  | -0.03 |
| Ireland                          | 12.1  | 12.91 | 11.28 | 5.28  | 4.44  | 6.13  | -0.45 | -0.54 | -0.34 |
| Israel                           | 5.64  | 5.94  | 5.34  | 2.63  | 2.65  | 2.61  | -0.50 | -0.54 | -0.45 |
| Italy                            | 37.33 | 42.9  | 31.43 | 16.93 | 18.42 | 15.35 | -0.60 | -0.65 | -0.54 |
| Jamaica                          | 6.84  | 8.19  | 5.46  | 5.69  | 5.53  | 5.86  | -0.35 | -0.44 | -0.20 |
| Japan                            | 5.36  | 6.31  | 4.39  | 6.36  | 7.61  | 5.05  | -0.27 | -0.29 | -0.27 |
| Jordan                           | 0.92  | 0.85  | 0.99  | 0.46  | 0.3   | 0.61  | -0.14 | -0.30 | -0.03 |
| Kazakhstan                       | 5.41  | 5.36  | 5.45  | 9.45  | 6.96  | 12.12 | 0.74  | 0.41  | 1.04  |
| Kenya                            | 1.14  | 1.05  | 1.23  | 1.2   | 0.94  | 1.46  | 0.34  | 0.21  | 0.44  |
| Kiribati                         | 10.26 | 8.94  | 11.59 | 7.29  | 5.34  | 9.28  | -0.10 | -0.17 | -0.03 |
| Kuwait                           | 1.21  | 0.98  | 1.4   | 0.62  | 0.43  | 0.77  | -0.30 | -0.41 | -0.24 |
| Kyrgyzstan                       | 3.62  | 2.2   | 5.11  | 5.92  | 2.66  | 9.24  | 1.12  | 0.79  | 1.12  |
| Laos                             | 5.56  | 5.64  | 5.49  | 3.16  | 2.91  | 3.4   | 0.44  | 0.42  | 0.51  |

|                                  |       |       |       |       |       |       |       |       |       |
|----------------------------------|-------|-------|-------|-------|-------|-------|-------|-------|-------|
| Latvia                           | 19.94 | 12.3  | 28.73 | 31.37 | 17.6  | 47.41 | 0.60  | 0.41  | 0.73  |
| Lebanon                          | 4.51  | 3.72  | 5.32  | 2.74  | 2.4   | 3.08  | -0.10 | -0.16 | -0.03 |
| Lesotho                          | 6.17  | 6.2   | 6.13  | 10.66 | 10.93 | 10.39 | -0.02 | -0.07 | 0.02  |
| Liberia                          | 1.75  | 1.65  | 1.85  | 1.02  | 0.79  | 1.26  | 0.36  | 0.03  | 0.73  |
| Libya                            | 5.85  | 5.72  | 5.97  | 3.64  | 3     | 4.28  | -0.47 | -0.49 | -0.44 |
| Lithuania                        | 6.77  | 4.3   | 9.52  | 15.11 | 6.99  | 24.55 | 0.94  | 0.40  | 1.26  |
| Luxembourg                       | 11.72 | 12.64 | 10.76 | 6.5   | 7.35  | 5.66  | -0.16 | -0.16 | -0.16 |
| Macedonia                        | 33.84 | 38.49 | 29.25 | 49    | 57.72 | 40.2  | 0.25  | 0.25  | 0.23  |
| Madagascar                       | 3.46  | 2.73  | 4.18  | 3.09  | 2.28  | 3.89  | 0.48  | 0.41  | 0.51  |
| Malawi                           | 1.75  | 1.74  | 1.77  | 1.38  | 1.18  | 1.59  | 0.53  | 0.38  | 0.67  |
| Malaysia                         | 2.7   | 2.27  | 3.1   | 2.62  | 1.57  | 3.69  | -0.10 | -0.24 | -0.02 |
| Maldives                         | 1.96  | 2.28  | 1.66  | 1.27  | 1.19  | 1.34  | 0.57  | 0.62  | 0.67  |
| Mali                             | 1.95  | 2.16  | 1.73  | 1.05  | 1.08  | 1.02  | -0.01 | -0.08 | 0.08  |
| Malta                            | 12.69 | 14.9  | 10.4  | 6.07  | 6.45  | 5.68  | -0.58 | -0.64 | -0.50 |
| Marshall Islands                 | 5.43  | 5.15  | 5.69  | 7.91  | 6.87  | 8.91  | 0.43  | 0.25  | 0.61  |
| Mauritania                       | 1.6   | 1.46  | 1.74  | 0.9   | 0.78  | 1.01  | 0.06  | -0.03 | 0.13  |
| Mauritius                        | 2.22  | 1.69  | 2.75  | 3.91  | 2.58  | 5.27  | 0.40  | 0.14  | 0.60  |
| Mexico                           | 1.09  | 0.95  | 1.23  | 1.28  | 1.06  | 1.49  | 0.13  | 0.01  | 0.22  |
| Moldova                          | 2.22  | 1.73  | 2.76  | 4.67  | 2.56  | 6.94  | 1.22  | 0.61  | 1.59  |
| Mongolia                         | 6.23  | 6.63  | 5.82  | 5.65  | 3.76  | 7.57  | 0.08  | -0.21 | 0.40  |
| Montenegro                       | 21.71 | 24.47 | 18.93 | 31.21 | 30.08 | 32.36 | 0.18  | 0.15  | 0.27  |
| Morocco                          | 3.94  | 4.22  | 3.65  | 2.76  | 2.28  | 3.25  | -0.19 | -0.37 | 0.06  |
| Mozambique                       | 1.77  | 1.59  | 1.97  | 2.14  | 1.74  | 2.56  | 0.86  | 0.69  | 0.99  |
| Myanmar                          | 3.78  | 3.84  | 3.72  | 3.96  | 4.09  | 3.83  | 0.54  | 0.74  | 0.40  |
| Namibia                          | 6.44  | 6.38  | 6.51  | 5.39  | 4.48  | 6.35  | -0.05 | -0.16 | 0.06  |
| Nepal                            | 0.49  | 0.39  | 0.6   | 0.64  | 0.48  | 0.81  | 1.31  | 1.45  | 1.20  |
| Netherlands                      | 13.98 | 15.12 | 12.83 | 7.52  | 8.13  | 6.89  | -0.45 | -0.47 | -0.43 |
| New Zealand                      | 7.37  | 4.92  | 9.88  | 4.62  | 2.64  | 6.69  | -0.30 | -0.43 | -0.22 |
| Nicaragua                        | 2.11  | 1.96  | 2.27  | 1.28  | 1.05  | 1.51  | -0.29 | -0.37 | -0.20 |
| Niger                            | 1.36  | 1.27  | 1.45  | 0.85  | 0.62  | 1.08  | 0.36  | 0.09  | 0.59  |
| Nigeria                          | 1.6   | 1.38  | 1.81  | 0.95  | 0.55  | 1.33  | 0.10  | -0.22 | 0.33  |
| North Korea                      | 1.94  | 1.72  | 2.17  | 2.12  | 2     | 2.24  | -0.17 | -0.09 | -0.24 |
| Northern Mariana Islands         | 2.99  | 3.12  | 2.87  | 3.04  | 2.02  | 4.07  | 0.43  | 0.14  | 0.70  |
| Norway                           | 4.33  | 4.58  | 4.07  | 4.83  | 5.56  | 4.1   | 0.49  | 0.48  | 0.48  |
| Oman                             | 0.59  | 0.63  | 0.56  | 0.69  | 0.52  | 0.77  | 0.93  | 0.48  | 1.29  |
| Pakistan                         | 0.65  | 0.4   | 0.88  | 1.11  | 0.91  | 1.31  | 1.22  | 2.16  | 0.84  |
| Palestine                        | 1.71  | 1.27  | 2.13  | 1.2   | 0.61  | 1.79  | -0.06 | -0.26 | 0.02  |
| Panama                           | 1.72  | 1.31  | 2.11  | 3.39  | 2.6   | 4.17  | 0.68  | 0.69  | 0.69  |
| Papua New Guinea                 | 5.44  | 6.48  | 4.45  | 6.37  | 7.17  | 5.6   | 0.39  | 0.28  | 0.56  |
| Paraguay                         | 1.79  | 1.7   | 1.87  | 1.95  | 1.55  | 2.33  | -0.15 | -0.24 | -0.07 |
| Peru                             | 2.16  | 2.08  | 2.25  | 0.97  | 0.86  | 1.09  | -0.31 | -0.40 | -0.21 |
| Philippines                      | 1.49  | 1.17  | 1.8   | 3.1   | 2.97  | 3.22  | 1.21  | 1.68  | 0.91  |
| Poland                           | 23.33 | 23.04 | 23.64 | 31.96 | 33.17 | 30.67 | 0.41  | 0.47  | 0.36  |
| Portugal                         | 7.2   | 8.44  | 5.88  | 6.57  | 6.93  | 6.19  | -0.03 | -0.12 | 0.13  |
| Puerto Rico                      | 7.46  | 8.32  | 6.54  | 5.98  | 6.7   | 5.21  | -0.31 | -0.42 | -0.22 |
| Qatar                            | 1.35  | 1.18  | 1.43  | 0.57  | 0.45  | 0.61  | -0.24 | -0.23 | -0.24 |
| Romania                          | 22.68 | 22.16 | 23.23 | 39.3  | 35.03 | 43.84 | 0.40  | 0.28  | 0.53  |
| Russia                           | 20.88 | 13.72 | 29.01 | 42.87 | 29.12 | 59.02 | 0.69  | 0.87  | 0.56  |
| Rwanda                           | 2.67  | 2.56  | 2.78  | 1.6   | 1.38  | 1.83  | 0.35  | 0.24  | 0.45  |
| Saint Lucia                      | 11.11 | 12.36 | 9.81  | 11.81 | 10.85 | 12.8  | 0.00  | -0.20 | 0.26  |
| Saint Vincent and the Grenadines | 3.98  | 5.06  | 2.89  | 5.72  | 5.17  | 6.25  | 0.19  | -0.06 | 0.63  |
| Samoa                            | 4.49  | 4     | 4.95  | 6.4   | 6.32  | 6.48  | 0.36  | 0.20  | 0.54  |
| Sao Tome and Principe            | 2.03  | 1.65  | 2.42  | 1.97  | 1.55  | 2.39  | 0.55  | 0.45  | 0.63  |
| Saudi Arabia                     | 2.46  | 2.69  | 2.28  | 2.73  | 1.94  | 3.34  | 0.85  | 0.45  | 1.19  |
| Senegal                          | 1.44  | 1.2   | 1.69  | 1.19  | 0.9   | 1.49  | 0.42  | 0.27  | 0.54  |
| Serbia                           | 18.58 | 19.85 | 17.27 | 27.34 | 28.38 | 26.25 | 0.14  | 0.09  | 0.22  |
| Seychelles                       | 2.07  | 1.19  | 2.96  | 1.91  | 1.02  | 2.77  | 0.02  | -0.07 | 0.07  |
| Sierra Leone                     | 1.72  | 1.32  | 2.13  | 1.38  | 1.08  | 1.69  | 0.30  | 0.23  | 0.39  |
| Singapore                        | 3.87  | 3.22  | 4.5   | 2.38  | 2.12  | 2.66  | -0.46 | -0.48 | -0.44 |
| Slovakia                         | 5.89  | 4.35  | 7.5   | 7.68  | 5.25  | 10.23 | 0.56  | 0.29  | 0.84  |
| Slovenia                         | 78.71 | 92.31 | 64.30 | 44.34 | 54.01 | 34.49 | -0.44 | -0.45 | -0.43 |
| Solomon Islands                  | 5.48  | 5.77  | 5.21  | 6.99  | 6.95  | 7.03  | 0.48  | 0.35  | 0.63  |
| Somalia                          | 2.95  | 2.79  | 3.12  | 2.04  | 1.89  | 2.2   | 0.01  | -0.01 | 0.05  |
| South Africa                     | 9.38  | 10.38 | 8.36  | 10.61 | 10.7  | 10.52 | -0.03 | -0.09 | 0.04  |
| South Korea                      | 2.88  | 3.13  | 2.63  | 2.32  | 2.64  | 1.99  | -0.30 | -0.28 | -0.33 |
| South Sudan                      | 2.55  | 2.41  | 2.69  | 2.17  | 1.97  | 2.36  | 0.22  | 0.18  | 0.29  |
| Spain                            | 13.21 | 15.86 | 10.45 | 11.88 | 12.31 | 11.44 | -0.08 | -0.25 | 0.18  |
| Sri Lanka                        | 6.58  | 3.85  | 9.25  | 2.21  | 1.6   | 2.86  | -0.64 | -0.60 | -0.65 |
| Sudan                            | 5.69  | 5.81  | 5.57  | 3.79  | 3.51  | 4.06  | 0.19  | 0.12  | 0.28  |
| Suriname                         | 5.56  | 6.97  | 4.19  | 6.03  | 6.35  | 5.72  | 0.00  | -0.13 | 0.22  |

|                                |        |        |        |        |        |        |       |       |       |
|--------------------------------|--------|--------|--------|--------|--------|--------|-------|-------|-------|
| Swaziland                      | 6.43   | 6.57   | 6.29   | 9.69   | 9.45   | 9.94   | -0.05 | -0.13 | 0.04  |
| Sweden                         | 9.23   | 8.53   | 9.94   | 7.52   | 7.13   | 7.91   | -0.04 | -0.08 | 0.00  |
| Switzerland                    | 8.38   | 8.06   | 8.73   | 6.1    | 5.79   | 6.42   | -0.15 | -0.20 | -0.09 |
| Syria                          | 5.91   | 5.09   | 6.71   | 5.07   | 4.16   | 5.96   | -0.34 | -0.17 | -0.43 |
| Taiwan                         | 2.47   | 1.91   | 3      | 2.28   | 1.68   | 2.89   | -0.30 | -0.34 | -0.27 |
| Tajikistan                     | 2.51   | 2.16   | 2.86   | 2.2    | 1.44   | 2.95   | 0.64  | 0.35  | 0.82  |
| Tanzania                       | 1.91   | 1.72   | 2.11   | 1.75   | 1.43   | 2.08   | 0.54  | 0.45  | 0.60  |
| Thailand                       | 8.15   | 6.72   | 9.6    | 1.98   | 1.35   | 2.63   | -0.82 | -0.86 | -0.76 |
| The Bahamas                    | 7.34   | 6.57   | 8.12   | 9.53   | 7.37   | 11.77  | 0.13  | -0.09 | 0.33  |
| The Gambia                     | 1.28   | 1.18   | 1.38   | 0.86   | 0.54   | 1.18   | 0.21  | -0.06 | 0.43  |
| Timor-Leste                    | 3.31   | 3.47   | 3.14   | 2.02   | 2.09   | 1.95   | 0.36  | 0.35  | 0.42  |
| Togo                           | 1.65   | 1.47   | 1.83   | 1.28   | 0.79   | 1.78   | 0.07  | -0.17 | 0.22  |
| Tonga                          | 1.24   | 0.53   | 1.94   | 1.84   | 0.71   | 2.96   | 0.35  | 0.26  | 0.38  |
| Trinidad and Tobago            | 3.59   | 4.2    | 2.97   | 6.48   | 5.07   | 7.93   | 0.49  | 0.05  | 1.10  |
| Tunisia                        | 3.42   | 3.7    | 3.13   | 2.79   | 2.21   | 3.38   | -0.17 | -0.36 | 0.05  |
| Turkey                         | 2.82   | 2.01   | 3.64   | 1.4    | 0.89   | 1.93   | -0.12 | -0.19 | -0.07 |
| Turkmenistan                   | 3.14   | 2.96   | 3.33   | 2.59   | 1.87   | 3.33   | 0.16  | -0.04 | 0.32  |
| Uganda                         | 2.02   | 1.89   | 2.15   | 1.88   | 1.4    | 2.36   | 0.79  | 0.51  | 1.01  |
| Ukraine                        | 9.82   | 6.19   | 14.05  | 17.15  | 9.21   | 26.54  | 0.42  | 0.27  | 0.46  |
| United Arab Emirates           | 3.65   | 2.76   | 4.11   | 3.44   | 1.8    | 4.04   | 0.25  | 0.24  | 0.21  |
| United Kingdom                 | 10.65  | 12.61  | 8.58   | 5.89   | 6.31   | 5.46   | -0.33 | -0.40 | -0.22 |
| United States                  | 10.92  | 8.51   | 13.45  | 8.86   | 6.97   | 10.83  | -0.16 | -0.18 | -0.14 |
| Uruguay                        | 14.05  | 11.64  | 16.62  | 10.55  | 8.12   | 13.16  | -0.32 | -0.44 | -0.19 |
| Uzbekistan                     | 0.72   | 0.68   | 0.77   | 0.94   | 0.76   | 1.12   | 0.52  | 0.41  | 0.61  |
| Vanuatu                        | 6.02   | 5.87   | 6.16   | 7.51   | 7.28   | 7.73   | 0.36  | 0.27  | 0.44  |
| Venezuela                      | 2.34   | 1.98   | 2.7    | 2.37   | 1.95   | 2.79   | -0.18 | -0.15 | -0.19 |
| Vietnam                        | 2.13   | 1.76   | 2.52   | 2.91   | 2.62   | 3.2    | 0.44  | 0.62  | 0.33  |
| Virgin Islands, U.S.           | 7.97   | 6.34   | 9.69   | 19.44  | 13.65  | 25.79  | 0.14  | 0.01  | 0.24  |
| Yemen                          | 5.65   | 6.28   | 5.01   | 3.4    | 3.41   | 3.39   | 0.20  | 0.12  | 0.34  |
| Zambia                         | 1.79   | 1.9    | 1.68   | 2.25   | 1.69   | 2.81   | 0.78  | 0.38  | 1.19  |
| Zimbabwe                       | 3.34   | 3.38   | 3.29   | 4.98   | 4.03   | 5.95   | 0.23  | 0.00  | 0.47  |
| <b>Cerebrovascular disease</b> |        |        |        |        |        |        |       |       |       |
| Afghanistan                    | 81.24  | 112.60 | 51.38  | 102.23 | 138.75 | 67.93  | 0.77  | 0.80  | 0.81  |
| Albania                        | 83.30  | 82.86  | 83.73  | 161.76 | 159.30 | 164.27 | 0.41  | 0.41  | 0.41  |
| Algeria                        | 43.90  | 47.98  | 39.93  | 60.25  | 65.40  | 55.17  | 0.49  | 0.47  | 0.51  |
| American Samoa                 | 52.63  | 41.65  | 63.02  | 34.28  | 36.33  | 32.24  | -0.18 | -0.13 | -0.24 |
| Andorra                        | 69.19  | 73.99  | 64.13  | 68.95  | 69.19  | 68.7   | -0.18 | -0.19 | -0.15 |
| Angola                         | 65.63  | 75.72  | 55.29  | 49.92  | 61.23  | 38.47  | 0.57  | 0.58  | 0.52  |
| Antigua and Barbuda            | 105.07 | 117.01 | 92.30  | 67.01  | 69.49  | 64.31  | -0.29 | -0.31 | -0.25 |
| Argentina                      | 85.96  | 83.68  | 88.34  | 58.78  | 62.17  | 55.24  | -0.33 | -0.35 | -0.32 |
| Armenia                        | 85.93  | 98.15  | 72.99  | 123.95 | 130.21 | 116.74 | 0.09  | 0.01  | 0.20  |
| Australia                      | 74.46  | 87.59  | 61.27  | 61.3   | 71.75  | 50.83  | -0.14 | -0.17 | -0.10 |
| Austria                        | 146.50 | 177.48 | 112.73 | 70.28  | 84.38  | 55.49  | -0.46 | -0.46 | -0.45 |
| Azerbaijan                     | 81.74  | 93.60  | 69.36  | 82.53  | 83.57  | 81.48  | 0.24  | 0.16  | 0.38  |
| Bahrain                        | 18.82  | 21.76  | 16.65  | 10.07  | 12.41  | 8.64   | -0.08 | -0.06 | -0.08 |
| Bangladesh                     | 57.59  | 66.23  | 49.34  | 97.83  | 98.19  | 97.48  | 1.89  | 1.84  | 2.04  |
| Barbados                       | 115.48 | 128.25 | 101.72 | 108.67 | 121.09 | 95.17  | -0.23 | -0.25 | -0.21 |
| Belarus                        | 174.00 | 209.47 | 133.83 | 217.72 | 242.08 | 189.47 | -0.09 | -0.10 | -0.05 |
| Belgium                        | 119.78 | 142.78 | 95.71  | 83.83  | 96.33  | 70.85  | -0.27 | -0.30 | -0.22 |
| Belize                         | 43.99  | 45.9   | 42.11  | 35.06  | 31.46  | 38.67  | -0.12 | -0.14 | -0.09 |
| Benin                          | 41.54  | 46.61  | 36.15  | 47.46  | 51.44  | 43.47  | 0.91  | 0.86  | 0.95  |
| Bermuda                        | 63.38  | 63.07  | 63.69  | 49.82  | 49     | 50.67  | -0.07 | -0.13 | -0.03 |
| Bhutan                         | 34.07  | 36.55  | 31.77  | 37.98  | 34.48  | 40.99  | 0.99  | 0.97  | 1.04  |
| Bolivia                        | 48.89  | 57.00  | 40.83  | 51.57  | 59.61  | 43.57  | 0.60  | 0.53  | 0.68  |
| Bosnia and Herzegovina         | 98.66  | 111.44 | 85.87  | 146.41 | 157.43 | 135.28 | 0.14  | 0.03  | 0.26  |
| Botswana                       | 39.36  | 49.27  | 29.22  | 54.92  | 63.03  | 46.81  | -0.06 | -0.09 | 0.03  |
| Brazil                         | 67.35  | 64.30  | 70.45  | 69.32  | 66.83  | 71.89  | -0.05 | -0.07 | -0.03 |
| Brunei                         | 31.46  | 32.64  | 30.41  | 31.24  | 31.52  | 30.97  | -0.11 | -0.13 | -0.09 |
| Bulgaria                       | 278.39 | 286.23 | 270.34 | 303.52 | 325.70 | 280.23 | -0.11 | -0.12 | -0.12 |
| Burkina Faso                   | 26.61  | 31.52  | 21.47  | 23.95  | 29.81  | 18.03  | 0.64  | 0.66  | 0.57  |
| Burundi                        | 105.64 | 124.16 | 86.48  | 41.63  | 47.34  | 35.8   | -0.09 | -0.09 | -0.05 |
| Cambodia                       | 70.34  | 78.78  | 61.30  | 70.01  | 72.70  | 67.18  | 0.90  | 0.87  | 1.01  |
| Cameroon                       | 49.30  | 55.58  | 42.94  | 51.44  | 56.49  | 46.39  | 0.27  | 0.25  | 0.27  |
| Canada                         | 53.6   | 60.21  | 46.88  | 49.57  | 56.32  | 42.72  | -0.16 | -0.21 | -0.11 |
| Cape Verde                     | 75.67  | 73.49  | 78.07  | 72.39  | 73.45  | 71.31  | 0.22  | 0.28  | 0.17  |
| Central African Republic       | 111.35 | 123.79 | 98.48  | 109.29 | 120.08 | 98.21  | 0.10  | 0.05  | 0.13  |
| Chad                           | 38.93  | 46.52  | 31.23  | 41.00  | 46.76  | 35.25  | 0.48  | 0.40  | 0.56  |
| Chile                          | 70.30  | 70.80  | 69.80  | 70.66  | 75.82  | 65.36  | -0.08 | -0.12 | -0.06 |
| China                          | 115.11 | 111.46 | 118.58 | 136.98 | 112.89 | 159.68 | 0.34  | 0.34  | 0.36  |
| Colombia                       | 35.41  | 37.79  | 33.01  | 33.67  | 36.05  | 31.21  | 0.04  | -0.04 | 0.10  |

|                                  |        |        |        |        |        |        |       |       |       |
|----------------------------------|--------|--------|--------|--------|--------|--------|-------|-------|-------|
| Comoros                          | 65.93  | 73.48  | 58.42  | 37.31  | 42.7   | 32.02  | 0.19  | 0.24  | 0.18  |
| Congo                            | 94.91  | 111.97 | 77.76  | 70.10  | 97.30  | 42.94  | 0.08  | 0.07  | -0.04 |
| Costa Rica                       | 26.86  | 28.17  | 25.58  | 30.27  | 32.03  | 28.51  | -0.09 | -0.11 | -0.09 |
| Cote d'Ivoire                    | 47.48  | 46.39  | 48.47  | 51.40  | 49.90  | 52.85  | 0.41  | 0.43  | 0.37  |
| Croatia                          | 192.30 | 213.19 | 170.09 | 189.40 | 218.82 | 157.83 | -0.14 | -0.16 | -0.13 |
| Cuba                             | 71.58  | 73.90  | 69.30  | 100.52 | 105.23 | 95.87  | 0.03  | 0.00  | 0.06  |
| Cyprus                           | 102.38 | 97.53  | 107.35 | 48.73  | 44.27  | 53.5   | -0.37 | -0.36 | -0.36 |
| Czech Republic                   | 225.49 | 260.49 | 188.39 | 122.92 | 146.35 | 98.73  | -0.35 | -0.35 | -0.35 |
| Democratic Republic of the Congo | 50.31  | 65.49  | 34.75  | 50.17  | 59.21  | 41.09  | 0.54  | 0.43  | 0.82  |
| Denmark                          | 124.66 | 140.74 | 108.11 | 79.79  | 87.85  | 71.60  | -0.20 | -0.23 | -0.16 |
| Djibouti                         | 44.28  | 42.31  | 46.22  | 57.18  | 54.57  | 59.76  | 0.44  | 0.51  | 0.42  |
| Dominica                         | 57.11  | 65.12  | 49.03  | 75.91  | 78.44  | 73.33  | 0.00  | 0.03  | 0.02  |
| Dominican Republic               | 36.5   | 35.21  | 37.78  | 67.26  | 64.87  | 69.67  | 0.59  | 0.58  | 0.60  |
| Ecuador                          | 33.42  | 32.56  | 34.26  | 37.11  | 36.58  | 37.64  | 0.11  | 0.13  | 0.09  |
| Egypt                            | 77.02  | 77.31  | 76.74  | 61.25  | 59.56  | 62.91  | 0.11  | 0.17  | 0.07  |
| El Salvador                      | 38.75  | 38.28  | 39.24  | 29.42  | 29.97  | 28.79  | -0.19 | -0.20 | -0.20 |
| Equatorial Guinea                | 118.43 | 140.02 | 97.78  | 44.30  | 50.35  | 38.54  | -0.22 | -0.24 | -0.19 |
| Eritrea                          | 53.52  | 64.44  | 42.47  | 50.57  | 65.33  | 35.86  | 0.46  | 0.47  | 0.37  |
| Estonia                          | 230.08 | 279.30 | 174.08 | 126.09 | 152.50 | 95.08  | -0.41 | -0.45 | -0.38 |
| Ethiopia                         | 70.84  | 75.38  | 66.28  | 41.07  | 45.18  | 36.94  | 0.69  | 0.70  | 0.65  |
| Federated States of Micronesia   | 76.16  | 69.17  | 82.85  | 70.41  | 66.63  | 74.01  | 0.04  | 0.05  | 0.03  |
| Fiji                             | 68.42  | 70.94  | 65.97  | 73.16  | 81.61  | 64.98  | -0.25 | -0.26 | -0.27 |
| Finland                          | 122.32 | 147.36 | 95.75  | 87.66  | 103.31 | 71.53  | -0.26 | -0.29 | -0.22 |
| France                           | 95.61  | 108.87 | 81.64  | 73.08  | 83.12  | 62.39  | -0.26 | -0.28 | -0.25 |
| Gabon                            | 103.88 | 107.42 | 100.19 | 70.59  | 84.02  | 57.47  | 0.07  | 0.16  | -0.06 |
| Georgia                          | 204.50 | 223.96 | 183.05 | 257.71 | 252.06 | 263.88 | -0.02 | -0.06 | 0.04  |
| Germany                          | 142.47 | 173.96 | 108.63 | 90.71  | 105.57 | 75.35  | -0.35 | -0.36 | -0.31 |
| Ghana                            | 51.67  | 79.96  | 24.26  | 57.55  | 78.46  | 36.44  | 0.65  | 0.55  | 1.06  |
| Greece                           | 189.94 | 220.85 | 158.24 | 177.17 | 206.39 | 146.50 | -0.23 | -0.26 | -0.22 |
| Greenland                        | 53.24  | 57.88  | 49.22  | 46.26  | 38.72  | 52.79  | 0.04  | -0.12 | 0.21  |
| Grenada                          | 118.88 | 137.52 | 99.75  | 95.05  | 110.98 | 79.21  | -0.21 | -0.21 | -0.21 |
| Guam                             | 41.59  | 40.27  | 42.75  | 75.60  | 76.85  | 74.40  | -0.05 | -0.06 | -0.06 |
| Guatemala                        | 19.43  | 20.29  | 18.55  | 24.82  | 27.24  | 22.3   | 0.89  | 0.95  | 0.80  |
| Guinea                           | 46.39  | 59.86  | 32.62  | 52.42  | 60.96  | 43.92  | 0.87  | 0.76  | 1.12  |
| Guinea-Bissau                    | 60.02  | 70.79  | 48.99  | 63.34  | 73.82  | 52.74  | 0.51  | 0.49  | 0.55  |
| Guyana                           | 109.92 | 103.55 | 116.50 | 94.92  | 89.21  | 100.59 | -0.16 | -0.12 | -0.18 |
| Haiti                            | 107.47 | 143.45 | 70.43  | 91.07  | 118.23 | 63.32  | 0.37  | 0.31  | 0.49  |
| Honduras                         | 58.31  | 58.92  | 57.70  | 56.14  | 58.62  | 53.66  | 0.00  | -0.04 | 0.04  |
| Hungary                          | 224.08 | 244.23 | 202.29 | 138.72 | 157.83 | 117.66 | -0.28 | -0.32 | -0.27 |
| Iceland                          | 67.45  | 75.04  | 59.93  | 46.67  | 46.65  | 46.68  | -0.20 | -0.22 | -0.16 |
| India                            | 57.00  | 59.28  | 54.88  | 61.15  | 57.62  | 64.42  | 0.47  | 0.48  | 0.48  |
| Indonesia                        | 75.38  | 83.08  | 67.74  | 110.02 | 115.49 | 104.62 | 0.79  | 0.79  | 0.82  |
| Iran                             | 44.43  | 38.63  | 50.02  | 54.64  | 45.94  | 63.21  | 0.69  | 0.87  | 0.60  |
| Iraq                             | 66.89  | 73.71  | 60.19  | 52.67  | 55.54  | 49.86  | -0.04 | 0.02  | -0.07 |
| Ireland                          | 74.11  | 87.34  | 60.77  | 44.33  | 49.14  | 39.37  | -0.24 | -0.25 | -0.22 |
| Israel                           | 59.86  | 63.91  | 55.81  | 41.85  | 45.47  | 38.16  | -0.25 | -0.27 | -0.23 |
| Italy                            | 131.71 | 145.60 | 116.98 | 119.83 | 138.84 | 99.63  | -0.20 | -0.22 | -0.19 |
| Jamaica                          | 103.77 | 121.98 | 85.11  | 117.19 | 131.05 | 103.23 | -0.12 | -0.12 | -0.10 |
| Japan                            | 107.82 | 112.27 | 103.21 | 133.14 | 139.25 | 126.70 | -0.24 | -0.27 | -0.22 |
| Jordan                           | 44.2   | 49.1   | 39.76  | 24.91  | 24.31  | 25.49  | -0.04 | -0.04 | -0.02 |
| Kazakhstan                       | 126.73 | 154.25 | 97.49  | 121.62 | 127.86 | 114.93 | -0.05 | -0.10 | 0.08  |
| Kenya                            | 28.22  | 32.92  | 23.49  | 27.2   | 28.87  | 25.52  | 0.24  | 0.19  | 0.33  |
| Kiribati                         | 111.20 | 85.55  | 137.39 | 119.46 | 81.63  | 158.26 | 0.35  | 0.32  | 0.34  |
| Kuwait                           | 8.7    | 8.93   | 8.49   | 11.68  | 9.46   | 13.41  | 0.82  | 0.44  | 1.18  |
| Kyrgyzstan                       | 129.98 | 152.77 | 106.21 | 98.00  | 93.03  | 103.08 | -0.02 | -0.11 | 0.15  |
| Laos                             | 91.82  | 106.16 | 77.46  | 62.41  | 65.30  | 59.48  | 0.66  | 0.61  | 0.77  |
| Latvia                           | 281.11 | 342.20 | 210.74 | 235.28 | 287.16 | 174.86 | -0.15 | -0.17 | -0.13 |
| Lebanon                          | 53.16  | 74.26  | 31.48  | 39.84  | 58.18  | 21.69  | 0.11  | 0.01  | 0.14  |
| Lesotho                          | 55.02  | 60.13  | 49.60  | 86.61  | 102.17 | 70.73  | -0.10 | -0.10 | -0.14 |
| Liberia                          | 41.70  | 48.47  | 34.89  | 39.09  | 47.22  | 31.09  | 1.17  | 1.07  | 1.24  |
| Libya                            | 30.16  | 33.13  | 27.49  | 41.07  | 43.43  | 38.74  | 0.13  | 0.21  | 0.07  |
| Lithuania                        | 128.87 | 151.66 | 103.51 | 159.74 | 187.54 | 127.41 | 0.08  | 0.06  | 0.08  |
| Luxembourg                       | 155.90 | 182.71 | 127.98 | 58.58  | 69.27  | 47.84  | -0.43 | -0.46 | -0.40 |
| Macedonia                        | 169.39 | 171.75 | 167.06 | 211.71 | 222.19 | 201.14 | 0.07  | 0.06  | 0.06  |
| Madagascar                       | 77.00  | 81.84  | 72.14  | 69.32  | 74.07  | 64.55  | 0.49  | 0.51  | 0.45  |
| Malawi                           | 32.77  | 41.93  | 23.3   | 27.42  | 30.83  | 24     | 0.61  | 0.46  | 0.92  |
| Malaysia                         | 51.26  | 51.97  | 50.57  | 51.25  | 42.69  | 59.98  | -0.08 | -0.10 | -0.03 |
| Maldives                         | 30.42  | 24.87  | 35.70  | 25.23  | 16.72  | 33.69  | 0.94  | 0.95  | 0.88  |
| Mali                             | 56.20  | 73.44  | 38.59  | 36.46  | 48.56  | 24.6   | 0.18  | 0.19  | 0.16  |
| Malta                            | 72.72  | 74.42  | 70.96  | 64.99  | 70.82  | 59.12  | -0.22 | -0.21 | -0.24 |

|                                  |        |        |        |        |        |        |       |       |       |
|----------------------------------|--------|--------|--------|--------|--------|--------|-------|-------|-------|
| Marshall Islands                 | 61.70  | 52.65  | 70.36  | 64.29  | 58.43  | 69.95  | 0.03  | 0.03  | 0.02  |
| Mauritania                       | 43.63  | 54.22  | 32.98  | 33.2   | 43.58  | 22.97  | 0.42  | 0.44  | 0.34  |
| Mauritius                        | 89.88  | 81.61  | 98.19  | 80.29  | 76.40  | 84.27  | -0.29 | -0.30 | -0.28 |
| Mexico                           | 25.37  | 26.78  | 23.95  | 31.52  | 33.84  | 29.18  | 0.19  | 0.14  | 0.23  |
| Moldova                          | 151.01 | 168.59 | 131.72 | 137.05 | 141.71 | 132.02 | -0.04 | -0.09 | 0.03  |
| Mongolia                         | 66.63  | 68.82  | 64.39  | 124.11 | 114.37 | 134.04 | 1.21  | 1.29  | 1.23  |
| Montenegro                       | 195.18 | 240.12 | 149.85 | 235.06 | 259.01 | 210.54 | -0.02 | -0.02 | 0.03  |
| Morocco                          | 44.20  | 49.86  | 38.52  | 55.21  | 63.03  | 47.21  | 0.42  | 0.41  | 0.41  |
| Mozambique                       | 49.57  | 49.64  | 49.49  | 56.42  | 55.79  | 57.09  | 0.74  | 0.68  | 0.76  |
| Myanmar                          | 94.45  | 95.69  | 93.15  | 100.27 | 89.14  | 111.91 | 0.53  | 0.47  | 0.61  |
| Namibia                          | 51.00  | 59.08  | 42.57  | 38.41  | 39.52  | 37.23  | -0.14 | -0.19 | -0.05 |
| Nepal                            | 38.10  | 40.19  | 35.98  | 45.98  | 41.63  | 50.60  | 1.12  | 1.03  | 1.23  |
| Netherlands                      | 85.77  | 99.29  | 71.95  | 64.68  | 74.26  | 54.95  | -0.23 | -0.27 | -0.19 |
| New Zealand                      | 76.89  | 89.99  | 63.38  | 61.86  | 73.94  | 49.32  | -0.10 | -0.13 | -0.10 |
| Nicaragua                        | 21.73  | 22.56  | 20.89  | 30.11  | 31.51  | 28.66  | 0.62  | 0.64  | 0.61  |
| Niger                            | 32.63  | 36.31  | 28.83  | 34.16  | 37.71  | 30.66  | 1.24  | 1.24  | 1.25  |
| Nigeria                          | 37.04  | 43.40  | 30.81  | 22.52  | 22.84  | 22.21  | 0.13  | 0.03  | 0.30  |
| North Korea                      | 91.65  | 109.05 | 73.22  | 169.74 | 184.95 | 153.84 | 0.38  | 0.30  | 0.52  |
| Northern Mariana Islands         | 36.86  | 37.73  | 36.08  | 19.73  | 14.31  | 25.18  | -0.25 | -0.33 | -0.17 |
| Norway                           | 131.56 | 148.69 | 114.05 | 67.97  | 81.11  | 54.98  | -0.31 | -0.34 | -0.29 |
| Oman                             | 16.57  | 20.88  | 13.13  | 16.95  | 20.63  | 15.08  | 0.65  | 0.68  | 0.83  |
| Pakistan                         | 56.42  | 51.10  | 61.35  | 64.53  | 55.73  | 72.85  | 0.47  | 0.50  | 0.44  |
| Palestine                        | 30.48  | 33.77  | 27.27  | 32.27  | 30.84  | 33.66  | 0.39  | 0.37  | 0.48  |
| Panama                           | 45.19  | 43.91  | 46.44  | 49.84  | 46.91  | 52.76  | -0.06 | -0.09 | -0.03 |
| Papua New Guinea                 | 86.48  | 99.02  | 74.51  | 84.21  | 102.01 | 67.10  | 0.16  | 0.19  | 0.11  |
| Paraguay                         | 48.17  | 52.42  | 44.02  | 61.66  | 62.37  | 60.97  | -0.01 | -0.01 | 0.01  |
| Peru                             | 37.52  | 37.39  | 37.65  | 23.07  | 24.28  | 21.86  | -0.06 | -0.06 | -0.07 |
| Philippines                      | 38.02  | 32.27  | 43.65  | 64.89  | 57.56  | 72.08  | 0.81  | 0.87  | 0.76  |
| Poland                           | 120.25 | 144.96 | 94.27  | 113.78 | 129.54 | 96.82  | -0.02 | -0.09 | 0.07  |
| Portugal                         | 257.93 | 276.97 | 237.45 | 144.24 | 155.24 | 132.51 | -0.40 | -0.40 | -0.40 |
| Puerto Rico                      | 48.4   | 47.2   | 49.67  | 60.24  | 67.23  | 52.69  | 0.06  | 0.03  | 0.04  |
| Qatar                            | 15.88  | 20.34  | 13.67  | 7.53   | 8.87   | 7.03   | -0.15 | -0.14 | -0.10 |
| Romania                          | 198.76 | 216.67 | 180.35 | 277.94 | 297.36 | 257.27 | 0.13  | 0.11  | 0.16  |
| Russia                           | 240.16 | 301.25 | 170.79 | 257.22 | 293.78 | 214.28 | -0.12 | -0.14 | -0.04 |
| Rwanda                           | 62.58  | 79.37  | 45.19  | 34.03  | 39.4   | 28.19  | 0.22  | 0.13  | 0.37  |
| Saint Lucia                      | 104.56 | 117.92 | 90.80  | 106.31 | 124.48 | 87.45  | -0.05 | -0.04 | -0.07 |
| Saint Vincent and the Grenadines | 77.20  | 95.31  | 58.91  | 88.78  | 97.44  | 80.27  | -0.04 | -0.06 | 0.03  |
| Samoa                            | 59.06  | 50.77  | 66.70  | 57.58  | 62.50  | 52.96  | -0.08 | -0.08 | -0.07 |
| Sao Tome and Principe            | 63.06  | 73.50  | 52.42  | 60.25  | 73.11  | 47.30  | 0.52  | 0.53  | 0.48  |
| Saudi Arabia                     | 23.22  | 25.09  | 21.76  | 22.79  | 21.86  | 23.5   | 0.63  | 0.72  | 0.61  |
| Senegal                          | 39.65  | 44.13  | 35.11  | 47.12  | 55.95  | 37.97  | 1.03  | 1.10  | 0.87  |
| Serbia                           | 202.91 | 228.50 | 176.65 | 246.85 | 277.78 | 214.41 | -0.06 | -0.09 | -0.04 |
| Seychelles                       | 78.56  | 79.89  | 77.21  | 51.36  | 50.53  | 52.17  | -0.28 | -0.32 | -0.23 |
| Sierra Leone                     | 37.60  | 33.20  | 42.10  | 45.50  | 52.87  | 37.98  | 0.94  | 1.38  | 0.57  |
| Singapore                        | 59.93  | 66.02  | 54.00  | 51.9   | 60.17  | 43.33  | -0.25 | -0.28 | -0.24 |
| Slovakia                         | 131.06 | 143.19 | 118.35 | 97.22  | 107.70 | 86.17  | -0.14 | -0.20 | -0.09 |
| Slovenia                         | 136.89 | 152.90 | 119.91 | 103.92 | 120.48 | 87.06  | -0.24 | -0.26 | -0.23 |
| Solomon Islands                  | 92.54  | 90.18  | 94.78  | 87.76  | 90.95  | 84.67  | 0.10  | 0.12  | 0.06  |
| Somalia                          | 77.36  | 93.05  | 61.38  | 56.79  | 68.47  | 44.99  | 0.12  | 0.12  | 0.12  |
| South Africa                     | 66.55  | 88.07  | 44.53  | 68.84  | 84.32  | 52.81  | -0.12 | -0.15 | -0.02 |
| South Korea                      | 113.90 | 126.39 | 101.46 | 87.72  | 95.93  | 79.42  | -0.33 | -0.35 | -0.31 |
| South Sudan                      | 52.94  | 62.61  | 43.17  | 50.24  | 59.46  | 41.05  | 0.44  | 0.44  | 0.46  |
| Spain                            | 118.52 | 134.39 | 101.98 | 74.46  | 86.66  | 61.96  | -0.36 | -0.38 | -0.35 |
| Sri Lanka                        | 28.97  | 23.96  | 33.89  | 65.89  | 60.94  | 71.21  | 1.43  | 1.43  | 1.36  |
| Sudan                            | 66.89  | 77.08  | 56.77  | 60.13  | 66.92  | 53.40  | 0.58  | 0.57  | 0.61  |
| Suriname                         | 68.93  | 75.21  | 62.86  | 96.18  | 101.67 | 90.70  | 0.28  | 0.29  | 0.28  |
| Swaziland                        | 44.63  | 51.26  | 37.23  | 65.25  | 75.55  | 54.74  | -0.07 | -0.10 | -0.04 |
| Sweden                           | 123.09 | 140.11 | 105.66 | 89     | 104.59 | 73.39  | -0.15 | -0.18 | -0.13 |
| Switzerland                      | 101.96 | 115.85 | 87.41  | 55.37  | 64.58  | 45.97  | -0.36 | -0.38 | -0.35 |
| Syria                            | 64.39  | 59.87  | 68.77  | 47.96  | 44.99  | 50.85  | -0.43 | -0.24 | -0.53 |
| Taiwan                           | 74.61  | 68.48  | 80.29  | 65.59  | 57.78  | 73.42  | -0.34 | -0.37 | -0.32 |
| Tajikistan                       | 77.25  | 85.24  | 69.17  | 56.14  | 56.45  | 55.83  | 0.35  | 0.32  | 0.41  |
| Tanzania                         | 37.87  | 44.03  | 31.6   | 34.14  | 36.61  | 31.65  | 0.50  | 0.40  | 0.63  |
| Thailand                         | 60.50  | 61.64  | 59.34  | 78.83  | 67.39  | 90.59  | -0.17 | -0.26 | -0.07 |
| The Bahamas                      | 55.94  | 60.67  | 51.15  | 67.57  | 74.26  | 60.58  | 0.05  | -0.01 | 0.09  |
| The Gambia                       | 33.1   | 39.36  | 26.93  | 29.57  | 30.58  | 28.54  | 0.63  | 0.61  | 0.79  |
| Timor-Leste                      | 42.77  | 50.13  | 35.60  | 49.34  | 59.28  | 39.72  | 1.42  | 1.45  | 1.39  |
| Togo                             | 44.27  | 52.35  | 35.98  | 43.45  | 43.48  | 43.41  | 0.35  | 0.27  | 0.50  |
| Tonga                            | 51.83  | 62.95  | 40.97  | 59.93  | 70.91  | 49.02  | 0.05  | 0.04  | 0.07  |
| Trinidad and Tobago              | 82.81  | 85.56  | 80.05  | 85.10  | 85.50  | 84.69  | -0.15 | -0.13 | -0.17 |

|                                  |        |        |        |        |        |        |       |       |       |
|----------------------------------|--------|--------|--------|--------|--------|--------|-------|-------|-------|
| Tunisia                          | 55.03  | 48.57  | 61.40  | 66.12  | 60.75  | 71.63  | 0.20  | 0.31  | 0.12  |
| Turkey                           | 43.74  | 51.13  | 36.17  | 41.69  | 43.66  | 39.64  | 0.66  | 0.51  | 0.90  |
| Turkmenistan                     | 75.13  | 81.73  | 68.34  | 84.01  | 79.76  | 88.41  | 0.57  | 0.48  | 0.70  |
| Uganda                           | 50.96  | 63.26  | 38.51  | 36.7   | 38.04  | 35.36  | 0.39  | 0.21  | 0.70  |
| Ukraine                          | 237.75 | 288.65 | 178.51 | 216.94 | 244.64 | 184.22 | -0.26 | -0.28 | -0.20 |
| United Arab Emirates             | 28.55  | 32.58  | 26.46  | 26.16  | 24.84  | 26.64  | 0.18  | 0.36  | 0.22  |
| United Kingdom                   | 130.61 | 156.79 | 102.92 | 82.51  | 95.99  | 68.68  | -0.23 | -0.27 | -0.18 |
| United States                    | 60.76  | 70.44  | 50.58  | 50.84  | 57.75  | 43.69  | -0.14 | -0.18 | -0.08 |
| Uruguay                          | 128.30 | 139.34 | 116.58 | 122.05 | 149.39 | 92.76  | -0.14 | -0.15 | -0.19 |
| Uzbekistan                       | 79.10  | 88.34  | 69.66  | 78.17  | 78.44  | 77.89  | 0.15  | 0.11  | 0.23  |
| Vanuatu                          | 102.25 | 94.04  | 110.00 | 96.49  | 98.99  | 94.05  | 0.02  | 0.07  | -0.03 |
| Venezuela                        | 35.61  | 37.53  | 33.72  | 43.08  | 44.37  | 41.78  | -0.02 | 0.02  | -0.04 |
| Vietnam                          | 96.47  | 99.76  | 93.09  | 130.02 | 131.09 | 128.92 | 0.41  | 0.40  | 0.43  |
| Virgin Islands, U.S.             | 44.12  | 43.12  | 45.17  | 93.83  | 88.76  | 99.40  | -0.01 | -0.03 | 0.02  |
| Yemen                            | 60.31  | 73.96  | 46.41  | 58.33  | 69.25  | 47.64  | 0.85  | 0.85  | 0.91  |
| Zambia                           | 35.45  | 47.82  | 22.86  | 40.69  | 42.21  | 39.17  | 0.64  | 0.37  | 1.30  |
| Zimbabwe                         | 27.54  | 34.15  | 20.87  | 33.00  | 34.32  | 31.65  | -0.02 | -0.16 | 0.22  |
| <b>Endocarditis</b>              |        |        |        |        |        |        |       |       |       |
| Afghanistan                      | 1.01   | 1.51   | 0.53   | 1.34   | 1.96   | 0.75   | 0.87  | 0.88  | 1.03  |
| Albania                          | 0.56   | 0.52   | 0.6    | 0.82   | 0.67   | 0.97   | 0.06  | -0.06 | 0.16  |
| Algeria                          | 1.82   | 2.18   | 1.48   | 2.31   | 2.82   | 1.8    | 0.39  | 0.42  | 0.38  |
| American Samoa                   | 1.74   | 1.61   | 1.86   | 2.12   | 2.52   | 1.72   | 0.57  | 0.65  | 0.38  |
| Andorra                          | 1.21   | 1.45   | 0.95   | 1.74   | 2      | 1.47   | 0.21  | 0.23  | 0.25  |
| Angola                           | 1.61   | 1.83   | 1.38   | 1.44   | 1.63   | 1.25   | 0.83  | 0.76  | 1.04  |
| Antigua and Barbuda              | 2.04   | 2.17   | 1.91   | 1.6    | 1.45   | 1.77   | -0.12 | -0.22 | 0.00  |
| Argentina                        | 3.12   | 4.55   | 1.64   | 3.7    | 5.46   | 1.86   | 0.16  | 0.06  | 0.23  |
| Armenia                          | 0.22   | 0.21   | 0.22   | 0.33   | 0.3    | 0.37   | 0.17  | 0.09  | 0.25  |
| Australia                        | 1      | 1.05   | 0.95   | 1.6    | 1.66   | 1.54   | 0.68  | 0.60  | 0.76  |
| Austria                          | 2.79   | 3.73   | 1.76   | 1.62   | 2.17   | 1.04   | -0.34 | -0.34 | -0.34 |
| Azerbaijan                       | 0.58   | 0.52   | 0.65   | 0.7    | 0.52   | 0.88   | 0.47  | 0.31  | 0.59  |
| Bahrain                          | 0.94   | 1.1    | 0.82   | 0.62   | 0.76   | 0.53   | 0.13  | 0.16  | 0.17  |
| Bangladesh                       | 0.13   | 0.15   | 0.12   | 0.24   | 0.26   | 0.22   | 2.08  | 2.43  | 1.92  |
| Barbados                         | 2.96   | 3.4    | 2.49   | 4.01   | 4.43   | 3.55   | 0.12  | 0.05  | 0.21  |
| Belarus                          | 0.61   | 0.52   | 0.71   | 0.99   | 0.7    | 1.32   | 0.19  | 0.07  | 0.27  |
| Belgium                          | 2.78   | 3.87   | 1.63   | 5.04   | 6.63   | 3.38   | 0.91  | 0.79  | 1.19  |
| Belize                           | 0.98   | 1.35   | 0.61   | 0.78   | 0.96   | 0.61   | -0.09 | -0.08 | 0.01  |
| Benin                            | 1.54   | 1.69   | 1.38   | 1.17   | 1.22   | 1.11   | 0.31  | 0.28  | 0.39  |
| Bermuda                          | 1.6    | 1.34   | 1.86   | 1.35   | 0.99   | 1.71   | 0.00  | -0.17 | 0.15  |
| Bhutan                           | 0.17   | 0.19   | 0.16   | 0.34   | 0.35   | 0.34   | 2.57  | 2.87  | 2.54  |
| Bolivia                          | 2.21   | 2.05   | 2.37   | 2.29   | 2.24   | 2.35   | 0.60  | 0.64  | 0.63  |
| Bosnia and Herzegovina           | 0.33   | 0.27   | 0.38   | 0.5    | 0.38   | 0.62   | 0.19  | 0.05  | 0.33  |
| Botswana                         | 0.78   | 0.91   | 0.65   | 0.91   | 0.9    | 0.93   | -0.20 | -0.27 | -0.08 |
| Brazil                           | 0.74   | 0.67   | 0.81   | 1.23   | 1.12   | 1.35   | 0.56  | 0.52  | 0.59  |
| Brunei                           | 0.99   | 0.71   | 1.24   | 1.27   | 0.87   | 1.66   | 0.17  | 0.11  | 0.22  |
| Bulgaria                         | 1.52   | 1.24   | 1.81   | 1.42   | 1.13   | 1.73   | -0.24 | -0.30 | -0.19 |
| Burkina Faso                     | 1.61   | 1.84   | 1.38   | 1.4    | 1.56   | 1.23   | 0.62  | 0.55  | 0.74  |
| Burundi                          | 2.16   | 2.31   | 2      | 1.16   | 1.25   | 1.07   | 0.26  | 0.36  | 0.30  |
| Cambodia                         | 1.59   | 1.77   | 1.4    | 1.34   | 1.41   | 1.27   | 0.69  | 0.75  | 0.90  |
| Cameroon                         | 1.81   | 1.98   | 1.63   | 1.37   | 1.35   | 1.38   | -0.07 | -0.15 | 0.03  |
| Canada                           | 1.07   | 1.19   | 0.96   | 1.73   | 1.83   | 1.63   | 0.47  | 0.31  | 0.65  |
| Cape Verde                       | 1.33   | 1.45   | 1.2    | 1.27   | 1.39   | 1.15   | 0.24  | 0.26  | 0.28  |
| Central African Republic         | 1.82   | 1.99   | 1.64   | 1.93   | 1.95   | 1.91   | 0.20  | 0.09  | 0.33  |
| Chad                             | 1.37   | 1.6    | 1.13   | 1.19   | 1.27   | 1.11   | 0.27  | 0.18  | 0.42  |
| Chile                            | 0.92   | 1.16   | 0.67   | 1.4    | 1.7    | 1.08   | 0.39  | 0.21  | 0.64  |
| China                            | 0.36   | 0.32   | 0.39   | 0.46   | 0.39   | 0.52   | 0.46  | 0.62  | 0.37  |
| Colombia                         | 0.67   | 0.63   | 0.71   | 0.94   | 0.81   | 1.08   | 0.54  | 0.30  | 0.77  |
| Comoros                          | 1.91   | 1.99   | 1.84   | 1.25   | 1.35   | 1.15   | 0.36  | 0.43  | 0.35  |
| Congo                            | 1.85   | 2.07   | 1.63   | 1.69   | 2.09   | 1.28   | 0.35  | 0.27  | 0.41  |
| Costa Rica                       | 0.69   | 0.57   | 0.8    | 1.16   | 1.07   | 1.24   | 0.36  | 0.49  | 0.27  |
| Cote d'Ivoire                    | 1.53   | 1.51   | 1.55   | 1.25   | 1.14   | 1.35   | 0.08  | 0.03  | 0.14  |
| Croatia                          | 0.74   | 0.71   | 0.78   | 0.78   | 0.73   | 0.83   | -0.08 | -0.15 | 0.00  |
| Cuba                             | 0.81   | 1.04   | 0.59   | 1.23   | 1.56   | 0.9    | 0.11  | 0.05  | 0.17  |
| Cyprus                           | 2.68   | 3.16   | 2.18   | 1.99   | 2.18   | 1.78   | 0.00  | -0.01 | 0.06  |
| Czech Republic                   | 0.86   | 0.79   | 0.93   | 1.41   | 1.3    | 1.52   | 0.97  | 0.90  | 1.04  |
| Democratic Republic of the Congo | 1.11   | 1.38   | 0.84   | 1.12   | 1.32   | 0.92   | 0.56  | 0.51  | 0.71  |
| Denmark                          | 1.34   | 1.71   | 0.95   | 1.87   | 2.02   | 1.71   | 0.75  | 0.47  | 1.28  |
| Djibouti                         | 1.78   | 1.73   | 1.83   | 1.95   | 1.73   | 2.17   | 0.22  | 0.16  | 0.29  |
| Dominica                         | 1.64   | 2.18   | 1.11   | 2.34   | 2.85   | 1.82   | 0.08  | 0.13  | 0.13  |
| Dominican Republic               | 1.05   | 1.36   | 0.75   | 1.07   | 1.33   | 0.82   | -0.11 | -0.14 | -0.05 |
| Ecuador                          | 0.87   | 0.8    | 0.94   | 0.9    | 0.77   | 1.03   | 0.04  | -0.03 | 0.11  |

|                                |      |      |      |      |      |      |       |       |       |
|--------------------------------|------|------|------|------|------|------|-------|-------|-------|
| Egypt                          | 3.83 | 5.83 | 1.84 | 3.41 | 5.16 | 1.7  | 0.25  | 0.35  | 0.24  |
| El Salvador                    | 1.09 | 1.1  | 1.07 | 0.98 | 0.9  | 1.08 | -0.03 | -0.15 | 0.12  |
| Equatorial Guinea              | 2.35 | 2.75 | 1.98 | 1.56 | 1.56 | 1.56 | 0.38  | 0.21  | 0.69  |
| Eritrea                        | 1.5  | 1.63 | 1.36 | 1.43 | 1.63 | 1.23 | 0.51  | 0.50  | 0.51  |
| Estonia                        | 1.04 | 0.8  | 1.32 | 1.34 | 1.23 | 1.47 | 0.38  | 0.56  | 0.27  |
| Ethiopia                       | 1.64 | 1.74 | 1.55 | 1.14 | 1.17 | 1.11 | 1.03  | 1.02  | 1.18  |
| Federated States of Micronesia | 2.63 | 3.28 | 2.01 | 3.22 | 4.04 | 2.44 | 0.40  | 0.38  | 0.42  |
| Fiji                           | 4.79 | 5.84 | 3.78 | 7.3  | 8.58 | 6.06 | 0.07  | -0.04 | 0.20  |
| Finland                        | 0.85 | 0.93 | 0.76 | 0.84 | 0.85 | 0.83 | 0.02  | -0.07 | 0.15  |
| France                         | 2.43 | 3.16 | 1.66 | 4.35 | 5.01 | 3.63 | 0.73  | 0.51  | 1.16  |
| Gabon                          | 2.24 | 2.37 | 2.1  | 1.93 | 2.17 | 1.69 | 0.36  | 0.38  | 0.34  |
| Georgia                        | 0.58 | 0.47 | 0.7  | 1.02 | 0.78 | 1.29 | 0.39  | 0.44  | 0.34  |
| Germany                        | 3.1  | 4.42 | 1.68 | 3.55 | 4.53 | 2.54 | 0.18  | 0.09  | 0.51  |
| Ghana                          | 1.55 | 2.07 | 1.05 | 1.56 | 1.68 | 1.45 | 0.49  | 0.30  | 0.91  |
| Greece                         | 1.87 | 3.04 | 0.66 | 2.75 | 4.2  | 1.23 | 0.21  | 0.10  | 0.58  |
| Greenland                      | 0.97 | 0.69 | 1.21 | 0.97 | 0.64 | 1.25 | 0.22  | 0.25  | 0.21  |
| Grenada                        | 3.41 | 4.49 | 2.3  | 3.7  | 4.82 | 2.58 | 0.09  | 0.08  | 0.14  |
| Guam                           | 1.02 | 1.06 | 0.99 | 3.34 | 3.51 | 3.19 | 0.88  | 0.85  | 0.90  |
| Guatemala                      | 0.91 | 1.02 | 0.79 | 0.69 | 0.65 | 0.73 | 0.14  | -0.03 | 0.43  |
| Guinea                         | 1.62 | 1.94 | 1.3  | 1.11 | 1.21 | 1.01 | 0.16  | 0.11  | 0.28  |
| Guinea-Bissau                  | 1.85 | 2.12 | 1.57 | 1.57 | 1.71 | 1.43 | 0.22  | 0.16  | 0.32  |
| Guyana                         | 2.13 | 2.92 | 1.31 | 2.28 | 2.67 | 1.88 | 0.05  | -0.06 | 0.41  |
| Haiti                          | 1.86 | 2.38 | 1.34 | 1.57 | 2.06 | 1.07 | 0.40  | 0.42  | 0.44  |
| Honduras                       | 0.85 | 0.93 | 0.76 | 0.9  | 0.87 | 0.93 | 0.12  | -0.09 | 0.43  |
| Hungary                        | 1.44 | 1.44 | 1.43 | 1.85 | 1.9  | 1.79 | 0.49  | 0.40  | 0.58  |
| Iceland                        | 0.71 | 0.84 | 0.59 | 0.95 | 0.93 | 0.98 | 0.55  | 0.41  | 0.79  |
| India                          | 0.18 | 0.19 | 0.18 | 0.39 | 0.36 | 0.41 | 1.93  | 2.05  | 1.91  |
| Indonesia                      | 0.87 | 0.84 | 0.9  | 1.22 | 1.19 | 1.25 | 0.75  | 0.84  | 0.71  |
| Iran                           | 0.4  | 0.34 | 0.46 | 0.58 | 0.43 | 0.72 | 1.01  | 1.02  | 1.08  |
| Iraq                           | 2.91 | 4.77 | 1.08 | 2.45 | 3.92 | 1.01 | 0.04  | 0.13  | 0.08  |
| Ireland                        | 1.32 | 1.73 | 0.91 | 1.16 | 1.17 | 1.16 | 0.12  | -0.09 | 0.54  |
| Israel                         | 0.88 | 1.02 | 0.73 | 1.38 | 1.41 | 1.35 | 0.70  | 0.42  | 1.09  |
| Italy                          | 0.97 | 1.16 | 0.77 | 2.99 | 3.73 | 2.21 | 1.73  | 1.65  | 1.74  |
| Jamaica                        | 1.49 | 1.9  | 1.07 | 2.06 | 2.47 | 1.65 | 0.08  | 0.08  | 0.14  |
| Japan                          | 1.66 | 2.03 | 1.28 | 2.67 | 3.34 | 1.97 | -0.01 | -0.03 | -0.02 |
| Jordan                         | 1.18 | 1.72 | 0.69 | 0.78 | 0.97 | 0.59 | 0.14  | 0.13  | 0.36  |
| Kazakhstan                     | 0.67 | 0.74 | 0.59 | 0.76 | 0.69 | 0.84 | 0.14  | 0.04  | 0.32  |
| Kenya                          | 0.81 | 0.89 | 0.72 | 0.87 | 0.89 | 0.85 | 0.40  | 0.37  | 0.47  |
| Kiribati                       | 3.9  | 4.39 | 3.4  | 4.45 | 4.86 | 4.03 | 0.44  | 0.55  | 0.38  |
| Kuwait                         | 0.42 | 0.66 | 0.22 | 0.41 | 0.55 | 0.3  | 0.36  | 0.19  | 0.97  |
| Kyrgyzstan                     | 0.29 | 0.25 | 0.33 | 0.24 | 0.18 | 0.31 | 0.11  | 0.08  | 0.12  |
| Laos                           | 2.08 | 2.23 | 1.94 | 1.6  | 1.6  | 1.6  | 1.00  | 1.14  | 1.21  |
| Latvia                         | 0.82 | 0.61 | 1.05 | 0.86 | 0.74 | 1.01 | 0.08  | 0.20  | 0.01  |
| Lebanon                        | 1.45 | 1.76 | 1.13 | 1.3  | 1.68 | 0.92 | 0.34  | 0.24  | 0.39  |
| Lesotho                        | 0.8  | 0.94 | 0.65 | 1.14 | 1.2  | 1.09 | -0.15 | -0.27 | 0.01  |
| Liberia                        | 1.6  | 1.72 | 1.47 | 0.95 | 1.05 | 0.86 | 0.41  | 0.35  | 0.54  |
| Libya                          | 1.58 | 1.87 | 1.33 | 1.47 | 1.78 | 1.16 | -0.21 | -0.10 | -0.28 |
| Lithuania                      | 0.77 | 0.61 | 0.96 | 1.16 | 0.97 | 1.39 | 0.31  | 0.38  | 0.27  |
| Luxembourg                     | 2.53 | 3.43 | 1.59 | 3.08 | 4.12 | 2.05 | 0.85  | 0.73  | 1.06  |
| Macedonia                      | 0.4  | 0.41 | 0.4  | 0.46 | 0.42 | 0.49 | -0.04 | -0.16 | 0.09  |
| Madagascar                     | 2.37 | 2.35 | 2.4  | 2.21 | 2.08 | 2.35 | 0.56  | 0.50  | 0.60  |
| Malawi                         | 1.17 | 1.35 | 0.99 | 1.01 | 1.07 | 0.95 | 0.67  | 0.63  | 0.83  |
| Malaysia                       | 1.59 | 1.17 | 1.99 | 2.61 | 1.7  | 3.53 | 0.52  | 0.60  | 0.46  |
| Maldives                       | 1.12 | 1.26 | 0.99 | 0.63 | 0.62 | 0.65 | 0.41  | 0.64  | 0.50  |
| Mali                           | 1.81 | 2.31 | 1.3  | 1.15 | 1.46 | 0.86 | 0.18  | 0.17  | 0.25  |
| Malta                          | 1.44 | 1.84 | 1.03 | 2.43 | 2.81 | 2.05 | 0.47  | 0.27  | 0.81  |
| Marshall Islands               | 2.2  | 2.74 | 1.68 | 2.93 | 3.59 | 2.28 | 0.35  | 0.27  | 0.44  |
| Mauritania                     | 1.39 | 1.63 | 1.15 | 0.99 | 1.16 | 0.81 | 0.36  | 0.33  | 0.41  |
| Mauritius                      | 0.71 | 0.82 | 0.61 | 1.23 | 1.08 | 1.39 | 0.38  | -0.01 | 0.92  |
| Mexico                         | 0.46 | 0.48 | 0.43 | 0.58 | 0.55 | 0.61 | 0.22  | 0.04  | 0.41  |
| Moldova                        | 0.33 | 0.27 | 0.39 | 0.56 | 0.39 | 0.74 | 0.79  | 0.55  | 0.96  |
| Mongolia                       | 0.24 | 0.25 | 0.23 | 0.27 | 0.23 | 0.31 | 0.36  | 0.32  | 0.45  |
| Montenegro                     | 0.48 | 0.49 | 0.47 | 0.65 | 0.59 | 0.71 | 0.12  | 0.13  | 0.13  |
| Morocco                        | 2.86 | 3.6  | 2.12 | 3.66 | 4.74 | 2.55 | 0.45  | 0.48  | 0.41  |
| Mozambique                     | 1.17 | 1.33 | 0.99 | 1.27 | 1.26 | 1.28 | 0.72  | 0.49  | 1.10  |
| Myanmar                        | 1.55 | 1.72 | 1.37 | 2    | 2.24 | 1.76 | 0.91  | 1.11  | 0.87  |
| Namibia                        | 0.82 | 0.9  | 0.73 | 0.62 | 0.57 | 0.67 | -0.11 | -0.20 | 0.00  |
| Nepal                          | 0.14 | 0.13 | 0.14 | 0.23 | 0.2  | 0.27 | 2.01  | 1.93  | 2.16  |
| Netherlands                    | 2.03 | 2.67 | 1.38 | 5.21 | 6.25 | 4.15 | 1.61  | 1.30  | 2.17  |
| New Zealand                    | 0.91 | 0.91 | 0.9  | 0.69 | 0.64 | 0.73 | -0.16 | -0.25 | -0.06 |



|                                  |      |      |      |      |      |      |       |       |       |
|----------------------------------|------|------|------|------|------|------|-------|-------|-------|
| Nicaragua                        | 0.51 | 0.53 | 0.49 | 0.54 | 0.52 | 0.55 | 0.24  | 0.17  | 0.35  |
| Niger                            | 1.27 | 1.46 | 1.07 | 0.81 | 0.92 | 0.7  | 0.42  | 0.45  | 0.48  |
| Nigeria                          | 1.27 | 1.35 | 1.19 | 0.74 | 0.67 | 0.82 | 0.09  | -0.02 | 0.26  |
| North Korea                      | 0.45 | 0.43 | 0.48 | 0.59 | 0.63 | 0.55 | -0.01 | 0.16  | -0.15 |
| Northern Mariana Islands         | 0.92 | 1.54 | 0.36 | 0.8  | 1.13 | 0.46 | 0.23  | 0.30  | 0.54  |
| Norway                           | 1.72 | 2.24 | 1.19 | 2.12 | 2.63 | 1.61 | 0.64  | 0.43  | 0.98  |
| Oman                             | 1.49 | 1.59 | 1.42 | 1.3  | 1.38 | 1.26 | 0.47  | 0.53  | 0.57  |
| Pakistan                         | 0.2  | 0.15 | 0.25 | 0.38 | 0.31 | 0.45 | 1.44  | 1.88  | 1.23  |
| Palestine                        | 1.03 | 1.36 | 0.7  | 0.94 | 1.22 | 0.67 | 0.21  | 0.35  | 0.18  |
| Panama                           | 0.63 | 0.54 | 0.72 | 1.06 | 0.95 | 1.17 | 0.43  | 0.49  | 0.39  |
| Papua New Guinea                 | 1.93 | 2.7  | 1.19 | 2.43 | 3.41 | 1.48 | 0.52  | 0.48  | 0.57  |
| Paraguay                         | 0.75 | 0.79 | 0.72 | 1.12 | 1.06 | 1.19 | 0.17  | 0.12  | 0.23  |
| Peru                             | 1.15 | 1.19 | 1.12 | 1.04 | 1.11 | 0.97 | 0.45  | 0.45  | 0.54  |
| Philippines                      | 0.5  | 0.55 | 0.45 | 0.94 | 0.96 | 0.91 | 0.99  | 0.84  | 1.19  |
| Poland                           | 1.1  | 1    | 1.22 | 0.95 | 0.71 | 1.21 | -0.11 | -0.27 | 0.04  |
| Portugal                         | 1.62 | 2.06 | 1.15 | 2.88 | 3.5  | 2.21 | 0.89  | 0.81  | 1.06  |
| Puerto Rico                      | 1.54 | 1.65 | 1.42 | 2.26 | 2.6  | 1.89 | 0.26  | 0.14  | 0.31  |
| Qatar                            | 0.27 | 0.24 | 0.29 | 0.16 | 0.16 | 0.16 | 0.08  | 0.39  | 0.00  |
| Romania                          | 0.5  | 0.31 | 0.69 | 0.66 | 0.47 | 0.87 | 0.08  | 0.21  | 0.02  |
| Russia                           | 0.33 | 0.37 | 0.29 | 1.21 | 0.85 | 1.62 | 2.00  | 1.03  | 3.39  |
| Rwanda                           | 1.71 | 1.94 | 1.48 | 1.17 | 1.26 | 1.07 | 0.55  | 0.56  | 0.64  |
| Saint Lucia                      | 3.33 | 4.16 | 2.48 | 3.7  | 4.29 | 3.09 | 0.04  | -0.06 | 0.21  |
| Saint Vincent and the Grenadines | 3.36 | 3.38 | 3.33 | 1.66 | 2.1  | 1.23 | -0.59 | -0.43 | -0.71 |
| Samoa                            | 2.3  | 2.94 | 1.71 | 3.09 | 4.22 | 2.03 | 0.32  | 0.13  | 0.41  |
| Sao Tome and Principe            | 2.3  | 2.52 | 2.07 | 1.71 | 1.82 | 1.6  | 0.22  | 0.15  | 0.32  |
| Saudi Arabia                     | 0.63 | 0.82 | 0.49 | 0.64 | 0.7  | 0.59 | 0.68  | 0.71  | 0.87  |
| Senegal                          | 1.21 | 1.38 | 1.05 | 1.05 | 1.18 | 0.91 | 0.51  | 0.46  | 0.57  |
| Serbia                           | 0.61 | 0.52 | 0.7  | 0.87 | 0.79 | 0.96 | 0.11  | 0.14  | 0.09  |
| Seychelles                       | 1.65 | 1.56 | 1.75 | 1.68 | 1.53 | 1.83 | 0.13  | 0.05  | 0.21  |
| Sierra Leone                     | 1.53 | 1.53 | 1.54 | 1.14 | 1.19 | 1.09 | 0.21  | 0.17  | 0.28  |
| Singapore                        | 0.64 | 0.54 | 0.74 | 1.37 | 1.39 | 1.35 | 0.86  | 1.04  | 0.72  |
| Slovakia                         | 0.93 | 0.81 | 1.05 | 0.85 | 0.7  | 1.02 | 0.07  | -0.08 | 0.24  |
| Slovenia                         | 0.95 | 0.85 | 1.06 | 0.74 | 0.62 | 0.86 | -0.22 | -0.31 | -0.12 |
| Solomon Islands                  | 2.35 | 3.13 | 1.62 | 3    | 3.98 | 2.05 | 0.50  | 0.46  | 0.56  |
| Somalia                          | 2.01 | 2.32 | 1.69 | 1.39 | 1.61 | 1.17 | 0.02  | 0.04  | 0.03  |
| South Africa                     | 1.12 | 1.33 | 0.9  | 1.07 | 1.14 | 1    | -0.18 | -0.24 | -0.09 |
| South Korea                      | 1.78 | 2.34 | 1.23 | 1.1  | 1.3  | 0.89 | -0.46 | -0.52 | -0.35 |
| South Sudan                      | 1.82 | 2.12 | 1.51 | 1.48 | 1.69 | 1.27 | 0.21  | 0.20  | 0.29  |
| Spain                            | 2.48 | 3.33 | 1.6  | 3.56 | 4.61 | 2.48 | 0.46  | 0.34  | 0.66  |
| Sri Lanka                        | 1.5  | 1.26 | 1.74 | 1.81 | 1.33 | 2.32 | 0.29  | 0.01  | 0.51  |
| Sudan                            | 1.4  | 1.77 | 1.03 | 1.33 | 1.66 | 0.99 | 0.72  | 0.79  | 0.79  |
| Suriname                         | 1.14 | 1.59 | 0.7  | 1.27 | 1.56 | 0.98 | 0.03  | -0.06 | 0.26  |
| Swaziland                        | 0.83 | 0.96 | 0.68 | 1.06 | 1.05 | 1.07 | -0.15 | -0.29 | 0.05  |
| Sweden                           | 1.76 | 2.24 | 1.26 | 2.37 | 2.98 | 1.76 | 0.59  | 0.47  | 0.75  |
| Switzerland                      | 1.73 | 2.15 | 1.29 | 6.47 | 7.66 | 5.25 | 3.41  | 3.01  | 4.08  |
| Syria                            | 1.07 | 1.58 | 0.59 | 0.96 | 1.48 | 0.46 | -0.31 | -0.04 | -0.48 |
| Taiwan                           | 1.32 | 1.15 | 1.48 | 3.11 | 3.03 | 3.19 | 0.75  | 0.98  | 0.59  |
| Tajikistan                       | 0.25 | 0.23 | 0.28 | 0.22 | 0.18 | 0.26 | 0.63  | 0.60  | 0.66  |
| Tanzania                         | 1.24 | 1.3  | 1.17 | 1.15 | 1.16 | 1.14 | 0.57  | 0.55  | 0.61  |
| Thailand                         | 1.58 | 1.63 | 1.54 | 4.08 | 3.88 | 4.29 | 0.88  | 0.82  | 1.06  |
| The Bahamas                      | 1.71 | 2.04 | 1.36 | 2.34 | 2.78 | 1.89 | 0.20  | 0.11  | 0.30  |
| The Gambia                       | 1.21 | 1.39 | 1.04 | 0.78 | 0.8  | 0.76 | 0.17  | 0.18  | 0.22  |
| Timor-Leste                      | 1.45 | 1.59 | 1.31 | 1.16 | 1.28 | 1.04 | 0.85  | 0.94  | 1.05  |
| Togo                             | 1.43 | 1.65 | 1.21 | 1.04 | 1.03 | 1.05 | 0.02  | -0.02 | 0.11  |
| Tonga                            | 2.65 | 3.58 | 1.74 | 3.94 | 5.2  | 2.69 | 0.37  | 0.37  | 0.42  |
| Trinidad and Tobago              | 1.4  | 1.51 | 1.29 | 1.88 | 1.98 | 1.78 | 0.11  | 0.15  | 0.09  |
| Tunisia                          | 2.14 | 2.49 | 1.79 | 2.55 | 2.83 | 2.27 | 0.20  | 0.20  | 0.25  |
| Turkey                           | 1.58 | 2.07 | 1.07 | 1.33 | 1.74 | 0.9  | 0.49  | 0.54  | 0.52  |
| Turkmenistan                     | 0.38 | 0.32 | 0.44 | 0.44 | 0.33 | 0.55 | 0.62  | 0.58  | 0.67  |
| Uganda                           | 1.23 | 1.4  | 1.06 | 1.19 | 1.16 | 1.23 | 0.89  | 0.72  | 1.20  |
| Ukraine                          | 0.73 | 0.65 | 0.83 | 1.05 | 0.85 | 1.29 | 0.19  | 0.14  | 0.24  |
| United Arab Emirates             | 0.8  | 0.86 | 0.77 | 1.04 | 0.88 | 1.1  | 0.66  | 0.82  | 0.76  |
| United Kingdom                   | 1.39 | 1.73 | 1.02 | 2.36 | 2.72 | 1.99 | 1.06  | 0.88  | 1.40  |
| United States                    | 1.78 | 1.89 | 1.67 | 2.55 | 2.7  | 2.4  | 0.48  | 0.43  | 0.54  |
| Uruguay                          | 3.24 | 4.29 | 2.12 | 5.1  | 6.53 | 3.56 | 0.43  | 0.22  | 0.73  |
| Uzbekistan                       | 0.19 | 0.18 | 0.19 | 0.21 | 0.17 | 0.25 | 0.32  | 0.19  | 0.44  |
| Vanuatu                          | 2.57 | 3.27 | 1.91 | 3.25 | 4.11 | 2.4  | 0.39  | 0.31  | 0.47  |
| Venezuela                        | 0.41 | 0.4  | 0.42 | 0.38 | 0.35 | 0.41 | -0.25 | -0.25 | -0.23 |
| Vietnam                          | 0.92 | 0.92 | 0.93 | 1.4  | 1.44 | 1.36 | 0.62  | 0.72  | 0.56  |
| Virgin Islands, U.S.             | 2.09 | 2.46 | 1.7  | 4.76 | 5.22 | 4.25 | 0.06  | 0.00  | 0.16  |

|                                     |        |        |        |        |        |        |       |       |       |
|-------------------------------------|--------|--------|--------|--------|--------|--------|-------|-------|-------|
| Yemen                               | 1.4    | 1.88   | 0.91   | 1.21   | 1.6    | 0.82   | 0.73  | 0.77  | 1.04  |
| Zambia                              | 1.19   | 1.44   | 0.92   | 1.36   | 1.29   | 1.42   | 0.64  | 0.41  | 1.06  |
| Zimbabwe                            | 0.25   | 0.15   | 0.36   | 0.36   | 0.16   | 0.56   | 0.17  | -0.14 | 0.30  |
| <b>Hemorrhagic and other stroke</b> |        |        |        |        |        |        |       |       |       |
| Afghanistan                         | 45.39  | 63.69  | 27.98  | 57.62  | 79.88  | 36.73  | 0.79  | 0.83  | 0.81  |
| Albania                             | 68.27  | 66.60  | 69.86  | 134.18 | 131.25 | 137.15 | 0.43  | 0.44  | 0.41  |
| Algeria                             | 24.46  | 26.26  | 22.7   | 28.22  | 30.21  | 26.25  | 0.25  | 0.25  | 0.27  |
| American Samoa                      | 35.30  | 27.08  | 43.07  | 23.2   | 24.21  | 22.19  | -0.18 | -0.11 | -0.24 |
| Andorra                             | 29.19  | 30.54  | 27.76  | 29.71  | 28.63  | 30.84  | -0.16 | -0.18 | -0.11 |
| Angola                              | 44.63  | 49.47  | 39.67  | 33.72  | 40.01  | 27.34  | 0.56  | 0.58  | 0.51  |
| Antigua and Barbuda                 | 46.83  | 48.42  | 45.13  | 37.45  | 36.12  | 38.9   | -0.11 | -0.14 | -0.08 |
| Argentina                           | 30.99  | 28.89  | 33.17  | 27.28  | 26.41  | 28.18  | -0.14 | -0.20 | -0.08 |
| Armenia                             | 36.8   | 40.33  | 33.07  | 48.72  | 50.15  | 47.07  | 0.01  | -0.04 | 0.07  |
| Australia                           | 35.73  | 42.5   | 28.93  | 31.12  | 36.58  | 25.65  | -0.09 | -0.13 | -0.04 |
| Austria                             | 51.82  | 60.04  | 42.86  | 30     | 34.55  | 25.22  | -0.35 | -0.35 | -0.34 |
| Azerbaijan                          | 58.51  | 67.05  | 49.60  | 58.19  | 59.79  | 56.57  | 0.22  | 0.16  | 0.34  |
| Bahrain                             | 10.64  | 11.53  | 9.98   | 4.63   | 5.15   | 4.31   | -0.25 | -0.26 | -0.23 |
| Bangladesh                          | 33.17  | 38.02  | 28.54  | 53.41  | 51.83  | 54.97  | 1.74  | 1.63  | 1.97  |
| Barbados                            | 43.43  | 45.25  | 41.46  | 54.67  | 57.75  | 51.32  | 0.03  | 0.02  | 0.05  |
| Belarus                             | 52.97  | 59.99  | 45.02  | 56.10  | 56.53  | 55.60  | -0.23 | -0.25 | -0.16 |
| Belgium                             | 49.11  | 56.4   | 41.48  | 41.32  | 46.06  | 36.4   | -0.12 | -0.15 | -0.07 |
| Belize                              | 20.7   | 20.62  | 20.77  | 19.72  | 17.12  | 22.34  | 0.05  | 0.05  | 0.07  |
| Benin                               | 24.47  | 25.32  | 23.58  | 29.68  | 29.71  | 29.66  | 1.02  | 0.98  | 1.04  |
| Bermuda                             | 27.43  | 25.84  | 29.04  | 24.04  | 21.84  | 26.28  | 0.03  | -0.06 | 0.11  |
| Bhutan                              | 21.09  | 22.62  | 19.66  | 20.47  | 18.04  | 22.56  | 0.73  | 0.67  | 0.82  |
| Bolivia                             | 26.89  | 31.44  | 22.37  | 24.46  | 27.97  | 20.97  | 0.38  | 0.30  | 0.48  |
| Bosnia and Herzegovina              | 47.45  | 51.39  | 43.50  | 30.09  | 31.22  | 28.95  | -0.52 | -0.56 | -0.47 |
| Botswana                            | 22.96  | 28.42  | 17.36  | 31.56  | 34.85  | 28.26  | -0.07 | -0.12 | 0.05  |
| Brazil                              | 46.57  | 44.60  | 48.57  | 46.53  | 45.11  | 47.99  | -0.07 | -0.09 | -0.06 |
| Brunei                              | 17.77  | 18.51  | 17.1   | 17.03  | 17.03  | 17.03  | -0.14 | -0.17 | -0.11 |
| Bulgaria                            | 145.60 | 146.25 | 144.93 | 123.15 | 127.08 | 119.04 | -0.31 | -0.33 | -0.30 |
| Burkina Faso                        | 15.6   | 18.11  | 12.96  | 14.45  | 17.21  | 11.65  | 0.69  | 0.67  | 0.68  |
| Burundi                             | 69.79  | 79.37  | 59.87  | 25.59  | 27.87  | 23.26  | -0.14 | -0.15 | -0.11 |
| Cambodia                            | 51.94  | 56.08  | 47.51  | 47.59  | 48.89  | 46.22  | 0.75  | 0.77  | 0.78  |
| Cameroon                            | 29.98  | 31.76  | 28.17  | 29.9   | 30.79  | 29.01  | 0.21  | 0.19  | 0.21  |
| Canada                              | 16.09  | 17.6   | 14.56  | 14.77  | 16.2   | 13.32  | -0.16 | -0.22 | -0.11 |
| Cape Verde                          | 41.77  | 36.71  | 47.36  | 39.49  | 36.4   | 42.65  | 0.21  | 0.27  | 0.16  |
| Central African Republic            | 73.08  | 77.74  | 68.27  | 71.39  | 74.52  | 68.17  | 0.10  | 0.03  | 0.13  |
| Chad                                | 22.36  | 25.36  | 19.32  | 24.41  | 26.18  | 22.63  | 0.54  | 0.45  | 0.63  |
| Chile                               | 24.44  | 23.99  | 24.9   | 29.6   | 29.87  | 29.32  | 0.11  | 0.02  | 0.18  |
| China                               | 80.79  | 77.06  | 84.33  | 81.90  | 65.50  | 97.36  | 0.14  | 0.12  | 0.16  |
| Colombia                            | 20.56  | 21.98  | 19.12  | 20.59  | 21.95  | 19.2   | 0.09  | 0.00  | 0.16  |
| Comoros                             | 44.27  | 45.81  | 42.73  | 24.37  | 26.14  | 22.64  | 0.16  | 0.22  | 0.14  |
| Congo                               | 59.57  | 66.84  | 52.25  | 43.01  | 57.45  | 28.6   | 0.05  | 0.06  | -0.05 |
| Costa Rica                          | 11.1   | 11.63  | 10.57  | 15.76  | 16.36  | 15.16  | 0.14  | 0.11  | 0.17  |
| Cote d'Ivoire                       | 30.51  | 26.85  | 33.88  | 32.84  | 29.23  | 36.33  | 0.40  | 0.44  | 0.35  |
| Croatia                             | 90.44  | 98.02  | 82.39  | 77.05  | 85.04  | 68.47  | -0.25 | -0.29 | -0.22 |
| Cuba                                | 29.28  | 29.74  | 28.84  | 38.26  | 37.34  | 39.16  | -0.04 | -0.12 | 0.04  |
| Cyprus                              | 50.21  | 47.32  | 53.17  | 23.88  | 20.55  | 27.44  | -0.37 | -0.39 | -0.34 |
| Czech Republic                      | 75.76  | 84.42  | 66.58  | 36.5   | 40.48  | 32.38  | -0.42 | -0.44 | -0.40 |
| Democratic Republic of the Congo    | 31.66  | 39.27  | 23.86  | 31.02  | 34.99  | 27.03  | 0.52  | 0.41  | 0.74  |
| Denmark                             | 59.68  | 66.55  | 52.62  | 38.87  | 41.86  | 35.84  | -0.19 | -0.22 | -0.14 |
| Djibouti                            | 29.98  | 26.5   | 33.41  | 36.75  | 32.14  | 41.31  | 0.37  | 0.42  | 0.36  |
| Dominica                            | 24.58  | 26.18  | 22.97  | 37.74  | 35.62  | 39.9   | 0.16  | 0.16  | 0.19  |
| Dominican Republic                  | 17.61  | 17.08  | 18.14  | 35.38  | 32.76  | 38     | 0.73  | 0.65  | 0.81  |
| Ecuador                             | 15.64  | 15.37  | 15.91  | 17.55  | 17.36  | 17.74  | 0.12  | 0.13  | 0.11  |
| Egypt                               | 48.94  | 45.03  | 52.81  | 37.75  | 33.55  | 41.87  | 0.08  | 0.13  | 0.04  |
| El Salvador                         | 20.17  | 19.98  | 20.37  | 15.53  | 16.01  | 14.99  | -0.18 | -0.18 | -0.20 |
| Equatorial Guinea                   | 74.21  | 83.17  | 65.65  | 28.99  | 31.44  | 26.65  | -0.19 | -0.20 | -0.17 |
| Eritrea                             | 37.67  | 43.06  | 32.21  | 33.21  | 41.12  | 25.33  | 0.36  | 0.38  | 0.27  |
| Estonia                             | 45.01  | 50.82  | 38.39  | 24.32  | 26.68  | 21.54  | -0.42 | -0.47 | -0.36 |
| Ethiopia                            | 45.87  | 47.42  | 44.32  | 23.61  | 25.1   | 22.11  | 0.50  | 0.50  | 0.47  |
| Federated States of Micronesia      | 46.70  | 43.65  | 49.61  | 41.84  | 40.64  | 42.98  | 0.01  | 0.02  | 0.00  |
| Fiji                                | 44.20  | 48.21  | 40.31  | 45.89  | 54.10  | 37.94  | -0.28 | -0.27 | -0.30 |
| Finland                             | 37.32  | 41.38  | 33.02  | 27.01  | 29.3   | 24.65  | -0.26 | -0.28 | -0.22 |
| France                              | 44.09  | 48.07  | 39.89  | 34.99  | 38.47  | 31.29  | -0.23 | -0.24 | -0.23 |
| Gabon                               | 64.47  | 61.84  | 67.21  | 42.06  | 46.07  | 38.14  | 0.02  | 0.11  | -0.07 |
| Georgia                             | 126.31 | 141.11 | 109.99 | 148.87 | 147.95 | 149.88 | -0.09 | -0.12 | -0.02 |
| Germany                             | 52.37  | 61.16  | 42.94  | 35.86  | 40.27  | 31.3   | -0.30 | -0.30 | -0.28 |
| Ghana                               | 30.27  | 44.75  | 16.24  | 30.69  | 38.75  | 22.55  | 0.50  | 0.36  | 0.90  |

|                          |        |        |        |        |        |        |       |       |       |
|--------------------------|--------|--------|--------|--------|--------|--------|-------|-------|-------|
| Greece                   | 87.85  | 99.41  | 75.99  | 81.62  | 90.12  | 72.69  | -0.24 | -0.28 | -0.19 |
| Greenland                | 36.01  | 39.79  | 32.75  | 30.32  | 26.1   | 33.99  | 0.00  | -0.14 | 0.17  |
| Grenada                  | 51.71  | 58.78  | 44.46  | 48.29  | 53.35  | 43.25  | -0.08 | -0.11 | -0.03 |
| Guam                     | 23.68  | 22.3   | 24.89  | 38.64  | 38.47  | 38.82  | -0.15 | -0.15 | -0.16 |
| Guatemala                | 10.61  | 11.24  | 9.98   | 13.27  | 14.38  | 12.12  | 0.85  | 0.85  | 0.82  |
| Guinea                   | 27.7   | 33.24  | 22.04  | 31.52  | 33.71  | 29.35  | 0.89  | 0.75  | 1.10  |
| Guinea-Bissau            | 36.90  | 40.53  | 33.19  | 40.50  | 44.62  | 36.32  | 0.56  | 0.56  | 0.58  |
| Guyana                   | 57.79  | 53.27  | 62.46  | 56.25  | 53.06  | 59.41  | -0.05 | 0.02  | -0.09 |
| Haiti                    | 54.77  | 74.28  | 34.69  | 48.61  | 63.36  | 33.52  | 0.44  | 0.36  | 0.61  |
| Honduras                 | 40.83  | 40.64  | 41.02  | 25.98  | 25.88  | 26.07  | -0.34 | -0.39 | -0.28 |
| Hungary                  | 74.99  | 77.73  | 72.02  | 35.55  | 37.11  | 33.83  | -0.45 | -0.49 | -0.41 |
| Iceland                  | 29.76  | 33.14  | 26.42  | 21.14  | 20.44  | 21.85  | -0.18 | -0.22 | -0.11 |
| India                    | 32.83  | 34.47  | 31.29  | 33.04  | 31.1   | 34.84  | 0.39  | 0.38  | 0.40  |
| Indonesia                | 52.56  | 56.32  | 48.84  | 73.87  | 74.26  | 73.49  | 0.73  | 0.70  | 0.78  |
| Iran                     | 23.22  | 19.79  | 26.53  | 25.86  | 21.69  | 29.97  | 0.53  | 0.71  | 0.43  |
| Iraq                     | 31.41  | 32.99  | 29.85  | 24.49  | 24.63  | 24.35  | -0.05 | 0.02  | -0.08 |
| Ireland                  | 32.84  | 38.1   | 27.53  | 21.39  | 23     | 19.74  | -0.17 | -0.19 | -0.13 |
| Israel                   | 27.09  | 28.88  | 25.3   | 20.35  | 21.03  | 19.66  | -0.19 | -0.25 | -0.12 |
| Italy                    | 52.13  | 55.75  | 48.29  | 57.48  | 63.8   | 50.77  | -0.03 | -0.06 | -0.01 |
| Jamaica                  | 43.21  | 49.75  | 36.5   | 58.67  | 63.86  | 53.44  | 0.06  | 0.06  | 0.08  |
| Japan                    | 40.17  | 39.88  | 40.46  | 52.41  | 51.61  | 53.26  | -0.20 | -0.24 | -0.16 |
| Jordan                   | 13.29  | 14.52  | 12.18  | 6.98   | 6.37   | 7.55   | -0.10 | -0.15 | -0.04 |
| Kazakhstan               | 49.63  | 58.93  | 39.74  | 47.21  | 50.06  | 44.16  | -0.06 | -0.08 | 0.02  |
| Kenya                    | 17.88  | 20.62  | 15.12  | 17.34  | 17.97  | 16.72  | 0.25  | 0.19  | 0.36  |
| Kiribati                 | 68.60  | 52.45  | 85.10  | 73.80  | 49.43  | 98.80  | 0.35  | 0.31  | 0.36  |
| Kuwait                   | 3.87   | 3.73   | 3.99   | 4.13   | 2.76   | 5.2    | 0.44  | 0.01  | 0.80  |
| Kyrgyzstan               | 61.52  | 71.93  | 50.66  | 49.61  | 48.14  | 51.11  | 0.05  | -0.01 | 0.20  |
| Laos                     | 66.12  | 74.14  | 58.09  | 42.29  | 43.04  | 41.54  | 0.56  | 0.52  | 0.65  |
| Latvia                   | 82.49  | 98.65  | 63.88  | 47.9   | 52.75  | 42.24  | -0.41 | -0.47 | -0.31 |
| Lebanon                  | 25.71  | 36.66  | 14.45  | 16.95  | 24.93  | 9.05   | -0.02 | -0.12 | 0.04  |
| Lesotho                  | 29.78  | 31.91  | 27.52  | 46.66  | 52.37  | 40.83  | -0.10 | -0.12 | -0.10 |
| Liberia                  | 26.34  | 28.68  | 23.99  | 23.22  | 26.17  | 20.33  | 1.04  | 0.94  | 1.13  |
| Libya                    | 18.7   | 19.66  | 17.84  | 19.86  | 20.09  | 19.63  | -0.12 | -0.05 | -0.16 |
| Lithuania                | 31.43  | 35.2   | 27.24  | 31.83  | 34.16  | 29.11  | -0.12 | -0.16 | -0.06 |
| Luxembourg               | 69.17  | 79.26  | 58.67  | 29.82  | 33.94  | 25.68  | -0.35 | -0.39 | -0.30 |
| Macedonia                | 78.30  | 80.71  | 75.91  | 89.66  | 93.60  | 85.68  | -0.02 | -0.05 | -0.01 |
| Madagascar               | 52.11  | 52.56  | 51.66  | 45.32  | 45.02  | 45.64  | 0.44  | 0.43  | 0.43  |
| Malawi                   | 20.45  | 25.76  | 14.96  | 15.51  | 16.64  | 14.38  | 0.46  | 0.28  | 0.79  |
| Malaysia                 | 34.98  | 34.98  | 34.97  | 33.26  | 26.85  | 39.78  | -0.12 | -0.16 | -0.07 |
| Maldives                 | 20.76  | 17.06  | 24.28  | 15.64  | 10.18  | 21.08  | 0.76  | 0.75  | 0.73  |
| Mali                     | 33.74  | 42.43  | 24.85  | 22.13  | 28.2   | 16.19  | 0.19  | 0.20  | 0.19  |
| Malta                    | 34.41  | 34.88  | 33.92  | 31.48  | 32.89  | 30.06  | -0.21 | -0.22 | -0.20 |
| Marshall Islands         | 40.44  | 34.72  | 45.91  | 40.51  | 36.95  | 43.95  | -0.01 | -0.01 | -0.01 |
| Mauritania               | 24.97  | 29.05  | 20.88  | 18.76  | 23.03  | 14.54  | 0.40  | 0.42  | 0.34  |
| Mauritius                | 59.80  | 51.26  | 68.38  | 52.03  | 46.88  | 57.30  | -0.31 | -0.32 | -0.30 |
| Mexico                   | 13.03  | 13.75  | 12.29  | 16.84  | 17.7   | 15.97  | 0.24  | 0.16  | 0.31  |
| Moldova                  | 65.44  | 71.65  | 58.62  | 55.12  | 53.33  | 57.06  | -0.11 | -0.19 | 0.00  |
| Mongolia                 | 56.84  | 56.90  | 56.78  | 111.07 | 101.94 | 120.39 | 1.32  | 1.48  | 1.27  |
| Montenegro               | 167.91 | 206.02 | 129.48 | 192.18 | 213.84 | 170.00 | -0.07 | -0.05 | -0.04 |
| Morocco                  | 20.77  | 22.61  | 18.92  | 22.45  | 24.53  | 20.32  | 0.23  | 0.22  | 0.24  |
| Mozambique               | 30.39  | 28.61  | 32.34  | 33.89  | 31.07  | 36.84  | 0.71  | 0.63  | 0.73  |
| Myanmar                  | 62.46  | 62.06  | 62.88  | 64.85  | 56.51  | 73.57  | 0.50  | 0.45  | 0.57  |
| Namibia                  | 28.86  | 32.6   | 24.95  | 21.3   | 21.36  | 21.24  | -0.16 | -0.21 | -0.08 |
| Nepal                    | 22.47  | 23.5   | 21.44  | 25.08  | 22.94  | 27.36  | 0.97  | 0.93  | 1.02  |
| Netherlands              | 39.45  | 44.32  | 34.47  | 31.22  | 34.86  | 27.5   | -0.20 | -0.23 | -0.16 |
| New Zealand              | 40.54  | 48.74  | 32.1   | 31.5   | 38.34  | 24.4   | -0.14 | -0.16 | -0.12 |
| Nicaragua                | 11.02  | 11.72  | 10.31  | 16.87  | 17.63  | 16.08  | 0.79  | 0.76  | 0.83  |
| Niger                    | 20.74  | 21.43  | 20.02  | 20.55  | 21.77  | 19.35  | 1.13  | 1.21  | 1.04  |
| Nigeria                  | 22.19  | 24.08  | 20.34  | 13.45  | 12.41  | 14.46  | 0.13  | 0.02  | 0.29  |
| North Korea              | 64.57  | 76.17  | 52.28  | 108.20 | 116.19 | 99.86  | 0.25  | 0.17  | 0.38  |
| Northern Mariana Islands | 26.74  | 27.38  | 26.17  | 14.36  | 10.43  | 18.31  | -0.25 | -0.33 | -0.17 |
| Norway                   | 59.12  | 65.73  | 52.36  | 32.09  | 37.06  | 27.18  | -0.28 | -0.32 | -0.24 |
| Oman                     | 14.15  | 17.86  | 11.2   | 11.64  | 13.23  | 10.83  | 0.33  | 0.25  | 0.54  |
| Pakistan                 | 31.66  | 28.71  | 34.4   | 35.97  | 31.13  | 40.55  | 0.46  | 0.50  | 0.44  |
| Palestine                | 23.8   | 26.08  | 21.58  | 19.74  | 18.28  | 21.16  | 0.09  | 0.05  | 0.18  |
| Panama                   | 19.49  | 19.05  | 19.92  | 25.46  | 23.43  | 27.48  | 0.11  | 0.05  | 0.18  |
| Papua New Guinea         | 60.21  | 70.08  | 50.79  | 56.33  | 69.23  | 43.93  | 0.11  | 0.14  | 0.07  |
| Paraguay                 | 31.61  | 34.73  | 28.55  | 43.88  | 44.35  | 43.42  | 0.08  | 0.07  | 0.11  |
| Peru                     | 19.64  | 18.57  | 20.72  | 11.54  | 11.79  | 11.29  | -0.10 | -0.08 | -0.13 |
| Philippines              | 27.21  | 21.6   | 32.71  | 47.55  | 40.29  | 54.68  | 0.85  | 0.96  | 0.78  |

|                                   |        |        |        |        |        |        |       |       |       |
|-----------------------------------|--------|--------|--------|--------|--------|--------|-------|-------|-------|
| Poland                            | 40.99  | 43.45  | 38.40  | 36.9   | 37.04  | 36.75  | -0.07 | -0.13 | 0.00  |
| Portugal                          | 109.07 | 112.57 | 105.31 | 67.46  | 68.29  | 66.57  | -0.34 | -0.36 | -0.32 |
| Puerto Rico                       | 18.91  | 17.23  | 20.69  | 31.23  | 33.4   | 28.89  | 0.41  | 0.40  | 0.38  |
| Qatar                             | 9.73   | 11.32  | 8.94   | 4.62   | 4.61   | 4.62   | -0.15 | -0.20 | -0.09 |
| Romania                           | 87.59  | 93.38  | 81.63  | 124.09 | 129.75 | 118.06 | 0.15  | 0.12  | 0.17  |
| Russia                            | 59.92  | 71.52  | 46.75  | 65.31  | 67.07  | 63.26  | -0.10 | -0.17 | 0.04  |
| Rwanda                            | 39.22  | 49.86  | 28.21  | 19.63  | 22.75  | 16.23  | 0.13  | 0.04  | 0.26  |
| Saint Lucia                       | 46.28  | 50.60  | 41.84  | 54.38  | 61.8   | 46.68  | 0.10  | 0.11  | 0.08  |
| Saint Vincent and the Grenadines  | 34.06  | 40.22  | 27.83  | 47.56  | 49.06  | 46.09  | 0.16  | 0.13  | 0.25  |
| Samoa                             | 36.37  | 31.41  | 40.94  | 33.52  | 36.69  | 30.54  | -0.13 | -0.12 | -0.13 |
| Sao Tome and Principe             | 34.20  | 36.34  | 32.02  | 33.44  | 37.78  | 29.07  | 0.56  | 0.59  | 0.49  |
| Saudi Arabia                      | 11.13  | 11.63  | 10.74  | 10.1   | 8.76   | 11.13  | 0.50  | 0.49  | 0.55  |
| Senegal                           | 23.86  | 24.71  | 22.99  | 27.74  | 30.7   | 24.67  | 0.99  | 1.05  | 0.85  |
| Serbia                            | 85.24  | 96.25  | 73.93  | 74.52  | 81.85  | 66.84  | -0.33 | -0.36 | -0.29 |
| Seychelles                        | 44.89  | 43.27  | 46.52  | 29.14  | 26.55  | 31.66  | -0.29 | -0.34 | -0.23 |
| Sierra Leone                      | 23.6   | 19.43  | 27.85  | 28.09  | 31.31  | 24.81  | 0.91  | 1.41  | 0.55  |
| Singapore                         | 27.4   | 29.01  | 25.83  | 19.31  | 20.41  | 18.17  | -0.39 | -0.44 | -0.34 |
| Slovakia                          | 55.02  | 57.31  | 52.62  | 30.46  | 30.89  | 30     | -0.36 | -0.43 | -0.28 |
| Slovenia                          | 41.39  | 43.29  | 39.38  | 41.04  | 44.9   | 37.11  | -0.01 | -0.03 | 0.01  |
| Solomon Islands                   | 60.51  | 61.15  | 59.91  | 56.53  | 60.53  | 52.65  | 0.08  | 0.10  | 0.05  |
| Somalia                           | 49.74  | 59.99  | 39.30  | 37.14  | 45.31  | 28.89  | 0.15  | 0.17  | 0.14  |
| South Africa                      | 35.73  | 45.87  | 25.36  | 35.77  | 41.48  | 29.85  | -0.14 | -0.20 | -0.03 |
| South Korea                       | 52.88  | 57.16  | 48.62  | 32.96  | 33.93  | 31.98  | -0.46 | -0.49 | -0.42 |
| South Sudan                       | 36.53  | 41.68  | 31.34  | 32.4   | 36.70  | 28.11  | 0.36  | 0.34  | 0.39  |
| Spain                             | 44.82  | 47.69  | 41.83  | 35.92  | 39.77  | 31.98  | -0.18 | -0.20 | -0.18 |
| Sri Lanka                         | 16.04  | 12.61  | 19.4   | 26.79  | 22.78  | 31.11  | 0.78  | 0.72  | 0.80  |
| Sudan                             | 36.50  | 42.04  | 31.01  | 29.87  | 33.91  | 25.85  | 0.43  | 0.46  | 0.42  |
| Suriname                          | 34.12  | 36.15  | 32.16  | 54.90  | 55.77  | 54.03  | 0.48  | 0.47  | 0.50  |
| Swaziland                         | 26.7   | 29.94  | 23.08  | 37.89  | 42.35  | 33.34  | -0.10 | -0.13 | -0.06 |
| Sweden                            | 49.63  | 55.44  | 43.69  | 36.31  | 41     | 31.61  | -0.14 | -0.18 | -0.09 |
| Switzerland                       | 44.95  | 50.14  | 39.52  | 24.64  | 28.24  | 20.95  | -0.36 | -0.37 | -0.34 |
| Syria                             | 38.11  | 32.96  | 43.09  | 24.88  | 21.35  | 28.31  | -0.50 | -0.35 | -0.58 |
| Taiwan                            | 41.97  | 38.63  | 45.07  | 33.53  | 28.43  | 38.64  | -0.40 | -0.45 | -0.36 |
| Tajikistan                        | 42.12  | 47.54  | 36.64  | 30.59  | 31.85  | 29.37  | 0.35  | 0.35  | 0.41  |
| Tanzania                          | 23.55  | 26.78  | 20.26  | 19.53  | 20.69  | 18.36  | 0.38  | 0.30  | 0.46  |
| Thailand                          | 48.27  | 47.71  | 48.84  | 53.49  | 42.53  | 64.76  | -0.29 | -0.39 | -0.19 |
| The Bahamas                       | 26.77  | 27.47  | 26.07  | 36.16  | 37.26  | 35.01  | 0.17  | 0.10  | 0.23  |
| The Gambia                        | 19.32  | 21.55  | 17.12  | 17.4   | 16.6   | 18.22  | 0.65  | 0.60  | 0.80  |
| Timor-Leste                       | 32.89  | 37.91  | 28.00  | 33.19  | 39.25  | 27.32  | 1.12  | 1.15  | 1.09  |
| Togo                              | 26.16  | 28.88  | 23.38  | 26.57  | 24.31  | 28.87  | 0.40  | 0.29  | 0.54  |
| Tonga                             | 30.32  | 37.74  | 23.09  | 33.11  | 39.51  | 26.75  | -0.01 | -0.03 | 0.04  |
| Trinidad and Tobago               | 36.31  | 36.59  | 36.02  | 45.5   | 44.47  | 46.56  | 0.03  | 0.06  | 0.02  |
| Tunisia                           | 26.62  | 22.57  | 30.61  | 28.04  | 23.77  | 32.41  | 0.05  | 0.10  | 0.02  |
| Turkey                            | 20.87  | 23.38  | 18.31  | 18.71  | 18.38  | 19.05  | 0.56  | 0.40  | 0.80  |
| Turkmenistan                      | 67.64  | 72.46  | 62.69  | 76.16  | 70.70  | 81.81  | 0.58  | 0.48  | 0.72  |
| Uganda                            | 33.13  | 41.26  | 24.9   | 23.19  | 23.6   | 22.77  | 0.35  | 0.14  | 0.70  |
| Ukraine                           | 64.85  | 73.80  | 54.43  | 61.10  | 60.11  | 62.26  | -0.23 | -0.31 | -0.11 |
| United Arab Emirates              | 17.7   | 19.9   | 16.56  | 16.8   | 16.53  | 16.89  | 0.23  | 0.50  | 0.24  |
| United Kingdom                    | 54.95  | 64.55  | 44.79  | 38.04  | 43.52  | 32.43  | -0.16 | -0.19 | -0.11 |
| United States                     | 19.09  | 21.29  | 16.76  | 16.44  | 17.64  | 15.21  | -0.11 | -0.18 | -0.03 |
| Uruguay                           | 40.03  | 41.59  | 38.37  | 42.94  | 48.68  | 36.79  | -0.03 | -0.07 | -0.02 |
| Uzbekistan                        | 41.99  | 48.45  | 35.39  | 40.46  | 42.08  | 38.78  | 0.13  | 0.09  | 0.21  |
| Vanuatu                           | 63.55  | 61.46  | 65.52  | 60.77  | 64.61  | 57.02  | 0.04  | 0.07  | 0.00  |
| Venezuela                         | 16.81  | 17.66  | 15.97  | 26.16  | 25.9   | 26.42  | 0.26  | 0.26  | 0.29  |
| Vietnam                           | 61.16  | 58.87  | 63.52  | 77.31  | 71.95  | 82.79  | 0.32  | 0.31  | 0.34  |
| Virgin Islands, U.S.              | 23.82  | 22.49  | 25.23  | 50.59  | 45.13  | 56.59  | -0.01 | -0.06 | 0.04  |
| Yemen                             | 35.11  | 41.97  | 28.12  | 31.20  | 36.62  | 25.9   | 0.69  | 0.71  | 0.71  |
| Zambia                            | 22.84  | 29.92  | 15.64  | 25.07  | 24.18  | 25.96  | 0.57  | 0.25  | 1.24  |
| Zimbabwe                          | 18.15  | 21.39  | 14.87  | 21.67  | 20.74  | 22.64  | -0.02 | -0.19 | 0.23  |
| <b>Hypertensive heart disease</b> |        |        |        |        |        |        |       |       |       |
| Afghanistan                       | 12.34  | 18.67  | 6.3    | 10.89  | 16.67  | 5.46   | 0.25  | 0.32  | 0.20  |
| Albania                           | 4.05   | 4.31   | 3.8    | 4.13   | 4.6    | 3.65   | -0.26 | -0.21 | -0.31 |
| Algeria                           | 7.7    | 10.25  | 5.21   | 11.27  | 14.46  | 8.11   | 0.60  | 0.54  | 0.73  |
| American Samoa                    | 10.32  | 7.92   | 12.59  | 5.1    | 4.73   | 5.46   | -0.38 | -0.40 | -0.35 |
| Andorra                           | 4.12   | 4.83   | 3.38   | 4.78   | 5.38   | 4.14   | -0.02 | 0.01  | 0.01  |
| Angola                            | 15.3   | 21.54  | 8.91   | 12.01  | 16.96  | 7.01   | 0.65  | 0.56  | 0.77  |
| Antigua and Barbuda               | 26.33  | 32.93  | 19.26  | 18.46  | 21.86  | 14.75  | -0.22 | -0.23 | -0.18 |
| Argentina                         | 11.24  | 11.16  | 11.32  | 14.28  | 15.87  | 12.62  | 0.25  | 0.25  | 0.21  |
| Armenia                           | 11.75  | 14.58  | 8.75   | 22.02  | 26.1   | 17.32  | 0.47  | 0.43  | 0.54  |
| Australia                         | 3.89   | 5.21   | 2.56   | 4.07   | 5.49   | 2.64   | 0.10  | 0.07  | 0.13  |

|                                  |       |       |       |       |        |       |       |       |       |
|----------------------------------|-------|-------|-------|-------|--------|-------|-------|-------|-------|
| Austria                          | 15.24 | 20.24 | 9.8   | 26.72 | 36.57  | 16.38 | 0.98  | 1.06  | 0.87  |
| Azerbaijan                       | 5.03  | 6.24  | 3.77  | 5.66  | 6.46   | 4.85  | 0.39  | 0.37  | 0.53  |
| Bahrain                          | 2.05  | 3.14  | 1.25  | 1.36  | 2.35   | 0.76  | 0.14  | 0.24  | 0.08  |
| Bangladesh                       | 7.94  | 7.93  | 7.95  | 7.63  | 7.26   | 7.99  | 0.63  | 0.75  | 0.55  |
| Barbados                         | 17.28 | 21.37 | 12.86 | 17.54 | 20.97  | 13.81 | -0.16 | -0.22 | -0.09 |
| Belarus                          | 6.54  | 7.82  | 5.09  | 15.9  | 17.55  | 14    | 0.79  | 0.82  | 0.88  |
| Belgium                          | 4.7   | 6.26  | 3.06  | 5.85  | 8.41   | 3.18  | 0.31  | 0.40  | 0.11  |
| Belize                           | 11    | 12.14 | 9.88  | 8.34  | 8.19   | 8.49  | -0.16 | -0.15 | -0.14 |
| Benin                            | 5.12  | 7.25  | 2.85  | 4.86  | 6.68   | 3.04  | 0.59  | 0.56  | 0.76  |
| Bermuda                          | 10.06 | 9.3   | 10.82 | 7.29  | 6.72   | 7.88  | -0.14 | -0.19 | -0.11 |
| Bhutan                           | 8.28  | 8.63  | 7.95  | 7.45  | 6.97   | 7.86  | 0.61  | 0.71  | 0.58  |
| Bolivia                          | 2.68  | 3.54  | 1.83  | 3.4   | 4.67   | 2.13  | 0.94  | 0.96  | 0.85  |
| Bosnia and Herzegovina           | 3.74  | 4.64  | 2.83  | 6.39  | 8.11   | 4.66  | 0.33  | 0.31  | 0.32  |
| Botswana                         | 12.88 | 17.43 | 8.21  | 17.05 | 22.29  | 11.81 | -0.12 | -0.10 | -0.07 |
| Brazil                           | 7.4   | 7.87  | 6.92  | 11.56 | 12.51  | 10.59 | 0.45  | 0.43  | 0.45  |
| Brunei                           | 2.94  | 2.36  | 3.46  | 3.58  | 2.95   | 4.18  | 0.11  | 0.17  | 0.10  |
| Bulgaria                         | 27.94 | 29.07 | 26.77 | 77.39 | 83.76  | 70.70 | 1.26  | 1.23  | 1.27  |
| Burkina Faso                     | 7.5   | 10.81 | 4.03  | 7.21  | 10.71  | 3.66  | 0.76  | 0.76  | 0.73  |
| Burundi                          | 31.63 | 41.92 | 20.98 | 14.15 | 19.64  | 8.55  | 0.01  | 0.08  | -0.08 |
| Cambodia                         | 10.08 | 11.14 | 8.95  | 9.25  | 9.81   | 8.66  | 0.76  | 0.79  | 0.79  |
| Cameroon                         | 6.17  | 8.51  | 3.79  | 5.65  | 8.18   | 3.13  | 0.13  | 0.22  | -0.01 |
| Canada                           | 2.22  | 2.88  | 1.54  | 2.76  | 3.5    | 2.01  | 0.14  | 0.03  | 0.27  |
| Cape Verde                       | 4.6   | 6.21  | 2.81  | 3.94  | 5.63   | 2.2   | 0.14  | 0.24  | 0.04  |
| Central African Republic         | 25.44 | 34.06 | 16.52 | 24.75 | 31.59  | 17.73 | 0.10  | 0.01  | 0.23  |
| Chad                             | 4.88  | 7.36  | 2.37  | 4.32  | 6.35   | 2.3   | 0.25  | 0.22  | 0.38  |
| Chile                            | 9.23  | 10.05 | 8.38  | 16.66 | 20.15  | 13.08 | 0.65  | 0.65  | 0.57  |
| China                            | 20.04 | 20.73 | 19.39 | 18.13 | 16.71  | 19.47 | 0.02  | 0.07  | 0.02  |
| Colombia                         | 11.41 | 12.85 | 9.95  | 9.57  | 10.45  | 8.65  | -0.08 | -0.18 | 0.02  |
| Comoros                          | 19.47 | 24.54 | 14.43 | 10.9  | 14.32  | 7.55  | 0.18  | 0.24  | 0.13  |
| Congo                            | 22.36 | 30.9  | 13.77 | 16.83 | 25.85  | 7.82  | 0.11  | 0.05  | 0.01  |
| Costa Rica                       | 5.98  | 6.88  | 5.1   | 13.07 | 15.07  | 11.06 | 0.76  | 0.73  | 0.78  |
| Cote d'Ivoire                    | 5.66  | 7.43  | 4.03  | 4.94  | 6.64   | 3.3   | 0.14  | 0.20  | 0.04  |
| Croatia                          | 40.16 | 55.16 | 24.22 | 30.44 | 39.55  | 20.66 | -0.33 | -0.41 | -0.18 |
| Cuba                             | 5.11  | 5.69  | 4.54  | 17.91 | 19.02  | 16.8  | 1.58  | 1.35  | 1.84  |
| Cyprus                           | 12.07 | 13.74 | 10.36 | 7.55  | 8.48   | 6.55  | -0.15 | -0.10 | -0.16 |
| Czech Republic                   | 3.65  | 3.92  | 3.37  | 8.45  | 9.69   | 7.18  | 1.81  | 1.88  | 1.73  |
| Democratic Republic of the Congo | 14.3  | 21.18 | 7.24  | 14.09 | 19.23  | 8.93  | 0.55  | 0.44  | 0.92  |
| Denmark                          | 4.95  | 5.97  | 3.91  | 4.77  | 5.66   | 3.87  | 0.21  | 0.18  | 0.26  |
| Djibouti                         | 10.79 | 13.36 | 8.26  | 14.05 | 16.44  | 11.67 | 0.48  | 0.45  | 0.63  |
| Dominica                         | 33.78 | 40.76 | 26.74 | 30.54 | 32.8   | 28.24 | -0.31 | -0.31 | -0.28 |
| Dominican Republic               | 8.05  | 8.5   | 7.61  | 14.78 | 15.85  | 13.71 | 0.59  | 0.61  | 0.56  |
| Ecuador                          | 7.71  | 9.01  | 6.42  | 14.69 | 15.39  | 13.98 | 0.90  | 0.72  | 1.17  |
| Egypt                            | 9.46  | 12.74 | 6.21  | 9.47  | 12.1   | 6.9   | 0.41  | 0.45  | 0.47  |
| El Salvador                      | 5.54  | 6.48  | 4.56  | 8.5   | 10.36  | 6.4   | 0.63  | 0.63  | 0.52  |
| Equatorial Guinea                | 29.15 | 40.95 | 17.85 | 11.94 | 15.5   | 8.55  | -0.13 | -0.16 | 0.03  |
| Eritrea                          | 14.23 | 19.04 | 9.36  | 13.26 | 19.28  | 7.27  | 0.45  | 0.48  | 0.25  |
| Estonia                          | 8.66  | 10.19 | 6.92  | 83.92 | 105.78 | 58.25 | 9.40  | 9.52  | 8.77  |
| Ethiopia                         | 18.24 | 19.96 | 16.52 | 11.49 | 14.11  | 8.86  | 0.82  | 1.01  | 0.59  |
| Federated States of Micronesia   | 14.34 | 13.34 | 15.3  | 12.62 | 12.28  | 12.94 | 0.00  | 0.02  | -0.01 |
| Fiji                             | 12.4  | 13.3  | 11.52 | 24.31 | 26.6   | 22.09 | 0.37  | 0.30  | 0.43  |
| Finland                          | 8.55  | 11.43 | 5.49  | 13.52 | 17.64  | 9.27  | 0.63  | 0.56  | 0.78  |
| France                           | 7.62  | 10.3  | 4.79  | 8.71  | 11.71  | 5.51  | 0.11  | 0.08  | 0.14  |
| Gabon                            | 27.5  | 36.18 | 18.46 | 17.24 | 24.93  | 9.71  | 0.00  | 0.05  | -0.12 |
| Georgia                          | 10.29 | 12.77 | 7.55  | 59.66 | 61.74  | 57.38 | 3.60  | 3.28  | 4.53  |
| Germany                          | 19.47 | 26.14 | 12.31 | 28.01 | 39.13  | 16.51 | 0.48  | 0.59  | 0.33  |
| Ghana                            | 15.8  | 24.63 | 7.25  | 7.43  | 12.83  | 1.96  | -0.29 | -0.15 | -0.60 |
| Greece                           | 8.86  | 11.81 | 5.84  | 18.81 | 23.16  | 14.25 | 0.75  | 0.56  | 1.06  |
| Greenland                        | 3.02  | 3.81  | 2.34  | 3.98  | 4.06   | 3.91  | 0.58  | 0.40  | 0.89  |
| Grenada                          | 19.25 | 23.46 | 14.93 | 18.19 | 23.33  | 13.08 | -0.06 | -0.02 | -0.12 |
| Guam                             | 33.15 | 31.43 | 34.65 | 22.4  | 20.58  | 24.17 | -0.64 | -0.66 | -0.62 |
| Guatemala                        | 4.28  | 5.42  | 3.13  | 4.4   | 5.74   | 3     | 0.52  | 0.54  | 0.44  |
| Guinea                           | 6.63  | 10.47 | 2.69  | 6     | 8.93   | 3.08  | 0.51  | 0.48  | 0.82  |
| Guinea-Bissau                    | 7.55  | 10.99 | 4.03  | 6.78  | 9.95   | 3.58  | 0.32  | 0.33  | 0.32  |
| Guyana                           | 31.22 | 33.56 | 28.81 | 23.09 | 24.31  | 21.89 | -0.27 | -0.25 | -0.27 |
| Haiti                            | 24.03 | 31.65 | 16.2  | 20.88 | 26.11  | 15.53 | 0.41  | 0.31  | 0.61  |
| Honduras                         | 8.24  | 8.99  | 7.5   | 13.31 | 15.16  | 11.46 | 0.69  | 0.64  | 0.72  |
| Hungary                          | 33.48 | 41.59 | 24.7  | 38.35 | 47.47  | 28.29 | 0.33  | 0.21  | 0.45  |
| Iceland                          | 3.56  | 3.98  | 3.15  | 4.05  | 4.38   | 3.7   | 0.32  | 0.40  | 0.27  |
| India                            | 12.54 | 12.32 | 12.74 | 13.44 | 13.32  | 13.55 | 0.48  | 0.66  | 0.34  |
| Indonesia                        | 7.32  | 8.69  | 5.96  | 8.61  | 10.29  | 6.94  | 0.46  | 0.56  | 0.39  |

|                                  |       |       |       |       |       |       |       |       |       |
|----------------------------------|-------|-------|-------|-------|-------|-------|-------|-------|-------|
| Iran                             | 12.6  | 12.67 | 12.54 | 20.92 | 19.74 | 22.09 | 1.30  | 1.49  | 1.25  |
| Iraq                             | 10.03 | 13.15 | 6.97  | 7.42  | 9.55  | 5.35  | -0.09 | -0.01 | -0.12 |
| Ireland                          | 3.3   | 4.12  | 2.47  | 3     | 3.56  | 2.43  | 0.16  | 0.16  | 0.19  |
| Israel                           | 6.34  | 7.54  | 5.14  | 2.3   | 3.07  | 1.52  | -0.61 | -0.58 | -0.65 |
| Italy                            | 21.73 | 28.64 | 14.39 | 36.39 | 47.78 | 24.28 | 0.48  | 0.37  | 0.60  |
| Jamaica                          | 30.51 | 35.81 | 25.07 | 21.62 | 24.94 | 18.28 | -0.44 | -0.39 | -0.46 |
| Japan                            | 10.3  | 12.99 | 7.5   | 8.2   | 11.21 | 5.04  | -0.51 | -0.49 | -0.57 |
| Jordan                           | 13.03 | 16.17 | 10.19 | 11.41 | 11.98 | 10.88 | 0.50  | 0.45  | 0.66  |
| Kazakhstan                       | 8.15  | 9.5   | 6.72  | 13.96 | 14.61 | 13.26 | 0.70  | 0.67  | 0.82  |
| Kenya                            | 8.32  | 11.69 | 4.92  | 8.42  | 11.12 | 5.71  | 0.31  | 0.30  | 0.46  |
| Kiribati                         | 12.82 | 11.86 | 13.79 | 6.36  | 5.6   | 7.13  | -0.37 | -0.33 | -0.39 |
| Kuwait                           | 5.2   | 5.7   | 4.76  | 3.93  | 4.03  | 3.85  | 0.02  | -0.04 | 0.12  |
| Kyrgyzstan                       | 7.37  | 8.27  | 6.44  | 6.83  | 6.57  | 7.09  | 0.21  | 0.18  | 0.31  |
| Laos                             | 12.97 | 15.18 | 10.76 | 8.62  | 9.43  | 7.79  | 0.63  | 0.64  | 0.68  |
| Latvia                           | 2.92  | 3.52  | 2.22  | 21.88 | 26.66 | 16.32 | 6.73  | 6.54  | 7.06  |
| Lebanon                          | 8.56  | 11.05 | 6     | 5.3   | 7.72  | 2.9   | -0.08 | -0.08 | -0.19 |
| Lesotho                          | 19.24 | 23.25 | 14.99 | 28.66 | 37.7  | 19.44 | -0.16 | -0.14 | -0.20 |
| Liberia                          | 5.46  | 7.91  | 2.99  | 4.47  | 6.71  | 2.27  | 0.91  | 0.82  | 0.94  |
| Libya                            | 3.66  | 5.24  | 2.24  | 4.48  | 6.15  | 2.83  | 0.03  | 0.10  | -0.02 |
| Lithuania                        | 3.87  | 4.28  | 3.41  | 11.47 | 12.47 | 10.31 | 1.60  | 1.51  | 1.70  |
| Luxembourg                       | 7.37  | 10.69 | 3.91  | 5.35  | 7.29  | 3.4   | 0.10  | -0.02 | 0.39  |
| Macedonia                        | 19.47 | 22.3  | 16.67 | 22.22 | 25.97 | 18.44 | -0.02 | -0.04 | -0.02 |
| Madagascar                       | 22.72 | 27.55 | 17.87 | 21.14 | 26.66 | 15.58 | 0.55  | 0.62  | 0.43  |
| Malawi                           | 12.13 | 17.42 | 6.66  | 11.1  | 14.79 | 7.39  | 0.75  | 0.66  | 1.11  |
| Malaysia                         | 2.17  | 2.33  | 2.01  | 1.97  | 1.67  | 2.27  | -0.16 | -0.20 | -0.07 |
| Maldives                         | 3.86  | 5.07  | 2.71  | 2.16  | 2.59  | 1.73  | 0.31  | 0.51  | 0.28  |
| Mali                             | 7.26  | 11.11 | 3.33  | 4.12  | 6.46  | 1.82  | 0.05  | 0.08  | 0.01  |
| Malta                            | 4.71  | 5.25  | 4.14  | 6.4   | 7.32  | 5.48  | 0.18  | 0.15  | 0.21  |
| Marshall Islands                 | 11.1  | 9.23  | 12.89 | 10.76 | 9.36  | 12.11 | -0.04 | -0.05 | -0.02 |
| Mauritania                       | 5.08  | 7.7   | 2.44  | 3.39  | 5.39  | 1.41  | 0.27  | 0.30  | 0.13  |
| Mauritius                        | 15.03 | 15.9  | 14.16 | 22.4  | 24.74 | 20.01 | 0.19  | 0.17  | 0.18  |
| Mexico                           | 5.68  | 7.22  | 4.12  | 7.45  | 9.51  | 5.37  | 0.26  | 0.19  | 0.32  |
| Moldova                          | 3.9   | 4.52  | 3.22  | 16.66 | 19.43 | 13.67 | 3.52  | 3.70  | 3.39  |
| Mongolia                         | 8.56  | 9.05  | 8.06  | 5.51  | 5.28  | 5.74  | -0.23 | -0.16 | -0.24 |
| Montenegro                       | 2.55  | 3.49  | 1.6   | 3.46  | 4.37  | 2.53  | 0.14  | 0.21  | 0.20  |
| Morocco                          | 7.64  | 10.15 | 5.12  | 8.3   | 11.25 | 5.29  | 0.24  | 0.26  | 0.20  |
| Mozambique                       | 14.29 | 18.04 | 10.21 | 15.31 | 19.14 | 11.3  | 0.67  | 0.63  | 0.78  |
| Myanmar                          | 15.92 | 22.36 | 9.22  | 15.8  | 20.85 | 10.52 | 0.46  | 0.52  | 0.57  |
| Namibia                          | 16.06 | 20.18 | 11.75 | 11.45 | 13.57 | 9.21  | -0.19 | -0.19 | -0.15 |
| Nepal                            | 8.83  | 9.02  | 8.63  | 8.93  | 8.17  | 9.74  | 0.78  | 0.79  | 0.80  |
| Netherlands                      | 3.35  | 4.47  | 2.19  | 4.3   | 5.79  | 2.78  | 0.31  | 0.27  | 0.34  |
| New Zealand                      | 4.59  | 5.7   | 3.46  | 4     | 5.32  | 2.63  | -0.03 | 0.00  | -0.11 |
| Nicaragua                        | 3.66  | 4.24  | 3.07  | 8.55  | 9.56  | 7.5   | 1.73  | 1.64  | 1.87  |
| Niger                            | 4.06  | 6.06  | 1.99  | 3.77  | 5.62  | 1.96  | 1.01  | 1.03  | 1.11  |
| Nigeria                          | 5.23  | 7.85  | 2.67  | 2.79  | 4.01  | 1.61  | 0.00  | 0.01  | 0.12  |
| North Korea                      | 12    | 16.19 | 7.57  | 19.33 | 24.59 | 13.83 | 0.21  | 0.19  | 0.33  |
| Northern Mariana Islands         | 3.07  | 4.15  | 2.09  | 1.7   | 1.77  | 1.63  | -0.22 | -0.23 | -0.07 |
| Norway                           | 4.7   | 5.83  | 3.54  | 3.53  | 4.92  | 2.16  | 0.01  | 0.03  | -0.10 |
| Oman                             | 1.25  | 2.14  | 0.55  | 1.57  | 2.47  | 1.12  | 1.04  | 0.97  | 2.31  |
| Pakistan                         | 11.37 | 8.41  | 14.13 | 9.95  | 7.4   | 12.37 | 0.13  | 0.21  | 0.07  |
| Palestine                        | 5.09  | 5.74  | 4.45  | 6.9   | 6.91  | 6.9   | 0.80  | 0.82  | 0.90  |
| Panama                           | 3.94  | 4.29  | 3.61  | 5.77  | 6.2   | 5.35  | 0.25  | 0.23  | 0.27  |
| Papua New Guinea                 | 14.4  | 15.76 | 13.11 | 11.81 | 13.31 | 10.36 | -0.02 | -0.02 | -0.01 |
| Paraguay                         | 4.09  | 4.53  | 3.65  | 11    | 11.55 | 10.47 | 1.10  | 1.14  | 1.12  |
| Peru                             | 2.41  | 3.16  | 1.66  | 2.14  | 2.85  | 1.43  | 0.36  | 0.32  | 0.37  |
| Philippines                      | 7.75  | 6.75  | 8.72  | 15.98 | 14.87 | 17.07 | 1.19  | 1.31  | 1.09  |
| Poland                           | 9.54  | 11.53 | 7.45  | 10.11 | 11.51 | 8.61  | 0.09  | 0.02  | 0.21  |
| Portugal                         | 7.75  | 10.14 | 5.17  | 10.44 | 13.39 | 7.3   | 0.44  | 0.41  | 0.51  |
| Puerto Rico                      | 10.45 | 10.62 | 10.27 | 21.09 | 22.77 | 19.27 | 0.73  | 0.55  | 0.85  |
| Qatar                            | 1.16  | 1.94  | 0.78  | 0.4   | 0.72  | 0.28  | -0.38 | -0.26 | -0.36 |
| Romania                          | 29.1  | 34.65 | 23.4  | 58.42 | 65.95 | 50.41 | 0.63  | 0.54  | 0.74  |
| Russia                           | 4.26  | 5.18  | 3.2   | 13.98 | 15.62 | 12.05 | 1.73  | 1.66  | 2.01  |
| Rwanda                           | 20.93 | 29.87 | 11.67 | 13.03 | 17.67 | 7.98  | 0.39  | 0.34  | 0.52  |
| Saint Lucia                      | 23.41 | 28.82 | 17.83 | 21.88 | 26.86 | 16.72 | -0.12 | -0.15 | -0.09 |
| Saint Vincent and the Grenadines | 23.34 | 28.8  | 17.82 | 28.18 | 31.12 | 25.29 | 0.00  | 0.00  | 0.08  |
| Samoa                            | 12    | 11.19 | 12.75 | 11.7  | 13.14 | 10.35 | -0.07 | -0.11 | -0.04 |
| Sao Tome and Principe            | 2.98  | 4.52  | 1.41  | 2.59  | 3.97  | 1.21  | 0.40  | 0.36  | 0.42  |
| Saudi Arabia                     | 0.92  | 1.52  | 0.46  | 1.03  | 1.5   | 0.66  | 0.84  | 0.96  | 1.18  |
| Senegal                          | 5.02  | 7.42  | 2.6   | 5.11  | 7.84  | 2.29  | 0.75  | 0.76  | 0.54  |
| Serbia                           | 11.87 | 14.28 | 9.39  | 20.37 | 25.23 | 15.27 | 0.33  | 0.33  | 0.30  |



|                               |        |        |        |        |        |        |       |       |       |
|-------------------------------|--------|--------|--------|--------|--------|--------|-------|-------|-------|
| Seychelles                    | 77.24  | 97.74  | 56.65  | 62.68  | 83.63  | 42.28  | -0.10 | -0.08 | -0.15 |
| Sierra Leone                  | 4.46   | 5.71   | 3.19   | 5.26   | 7.78   | 2.69   | 0.91  | 1.07  | 0.51  |
| Singapore                     | 8.2    | 9.14   | 7.29   | 14.12  | 14.08  | 14.17  | 0.50  | 0.22  | 0.84  |
| Slovakia                      | 6.48   | 7.55   | 5.36   | 14.97  | 17.52  | 12.28  | 1.83  | 1.74  | 1.92  |
| Slovenia                      | 18.28  | 24.08  | 12.12  | 25.73  | 35.06  | 16.24  | 0.41  | 0.37  | 0.43  |
| Solomon Islands               | 16.23  | 14.64  | 17.75  | 13.98  | 12.82  | 15.11  | 0.00  | -0.02 | 0.04  |
| Somalia                       | 19.34  | 26.17  | 12.39  | 14.39  | 19.83  | 8.9    | 0.14  | 0.15  | 0.13  |
| South Africa                  | 21.04  | 29.56  | 12.32  | 22.84  | 30.15  | 15.27  | -0.07 | -0.09 | 0.02  |
| South Korea                   | 7.6    | 9.8    | 5.41   | 8.44   | 12.57  | 4.26   | -0.03 | 0.10  | -0.29 |
| South Sudan                   | 16.46  | 21.63  | 11.25  | 15.22  | 20.33  | 10.12  | 0.42  | 0.43  | 0.42  |
| Spain                         | 4.85   | 6.9    | 2.72   | 10.01  | 14.18  | 5.72   | 1.11  | 0.99  | 1.28  |
| Sri Lanka                     | 4.16   | 3.18   | 5.12   | 8.96   | 8.76   | 9.18   | 1.30  | 1.63  | 1.02  |
| Sudan                         | 9.88   | 14.33  | 5.48   | 6.87   | 10.02  | 3.74   | 0.27  | 0.36  | 0.18  |
| Suriname                      | 15.33  | 19.1   | 11.69  | 14.23  | 17.12  | 11.34  | -0.14 | -0.14 | -0.13 |
| Swaziland                     | 15.51  | 19.22  | 11.36  | 19.69  | 25.26  | 14     | -0.20 | -0.20 | -0.19 |
| Sweden                        | 3.89   | 4.95   | 2.8    | 8.29   | 11.07  | 5.51   | 1.51  | 1.47  | 1.48  |
| Switzerland                   | 10.15  | 13.73  | 6.4    | 17.93  | 24.59  | 11.11  | 1.08  | 1.01  | 1.16  |
| Syria                         | 2.48   | 2.59   | 2.36   | 2.22   | 2.52   | 1.92   | -0.31 | 0.00  | -0.48 |
| Taiwan                        | 8.04   | 7.23   | 8.79   | 12.37  | 11.7   | 13.04  | 0.17  | 0.24  | 0.12  |
| Tajikistan                    | 7.49   | 9.23   | 5.74   | 6.36   | 7.05   | 5.69   | 0.60  | 0.57  | 0.77  |
| Tanzania                      | 12.1   | 15.92  | 8.21   | 11.1   | 14.08  | 8.08   | 0.53  | 0.49  | 0.62  |
| Thailand                      | 3.66   | 3.52   | 3.82   | 4.03   | 4.4    | 3.65   | -0.30 | -0.15 | -0.41 |
| The Bahamas                   | 28.4   | 31.69  | 25.07  | 46.95  | 54.89  | 38.66  | 0.43  | 0.41  | 0.42  |
| The Gambia                    | 4.24   | 6.3    | 2.22   | 3.22   | 4.52   | 1.9    | 0.43  | 0.51  | 0.47  |
| Timor-Leste                   | 5.85   | 7.26   | 4.47   | 6.43   | 8.51   | 4.42   | 1.32  | 1.47  | 1.14  |
| Togo                          | 5.82   | 8.64   | 2.93   | 4.65   | 6.13   | 3.13   | 0.11  | 0.09  | 0.36  |
| Tonga                         | 5.36   | 5.52   | 5.2    | 6.27   | 6.45   | 6.09   | 0.07  | 0.09  | 0.07  |
| Trinidad and Tobago           | 23.06  | 25.75  | 20.35  | 20.56  | 21.39  | 19.71  | -0.26 | -0.28 | -0.23 |
| Tunisia                       | 5.8    | 7.01   | 4.6    | 4.96   | 6.08   | 3.81   | -0.13 | -0.07 | -0.19 |
| Turkey                        | 12.7   | 14.83  | 10.52  | 10.75  | 12.86  | 8.57   | 0.49  | 0.58  | 0.43  |
| Turkmenistan                  | 7.59   | 8.94   | 6.2    | 8.84   | 9.51   | 8.15   | 0.64  | 0.62  | 0.74  |
| Uganda                        | 17.47  | 24.14  | 10.71  | 12.14  | 15.15  | 9.13   | 0.35  | 0.28  | 0.62  |
| Ukraine                       | 7.52   | 8.92   | 5.88   | 15.67  | 17.95  | 12.97  | 0.71  | 0.73  | 0.75  |
| United Arab Emirates          | 3.19   | 4.65   | 2.44   | 2.23   | 2.84   | 2      | -0.09 | 0.14  | 0.00  |
| United Kingdom                | 5.31   | 6.04   | 4.53   | 5.61   | 6.19   | 5.01   | 0.28  | 0.23  | 0.36  |
| United States                 | 10.03  | 11.48  | 8.51   | 11.69  | 12.27  | 11.09  | 0.20  | 0.06  | 0.39  |
| Uruguay                       | 9.69   | 10.5   | 8.83   | 16.47  | 20.63  | 12.01  | 0.54  | 0.57  | 0.40  |
| Uzbekistan                    | 34.47  | 34.61  | 34.33  | 36.98  | 35.52  | 38.48  | 0.26  | 0.29  | 0.25  |
| Vanuatu                       | 18.57  | 17.23  | 19.83  | 15.38  | 15.62  | 15.15  | -0.10 | -0.07 | -0.12 |
| Venezuela                     | 12.79  | 13.99  | 11.6   | 14.98  | 16.38  | 13.58  | -0.05 | 0.01  | -0.09 |
| Vietnam                       | 9.78   | 11.85  | 7.66   | 11.69  | 14.16  | 9.16   | 0.29  | 0.35  | 0.26  |
| Virgin Islands, U.S.          | 16.12  | 15.65  | 16.62  | 40.23  | 39.86  | 40.64  | 0.17  | 0.20  | 0.14  |
| Yemen                         | 8.28   | 11.78  | 4.71   | 5.9    | 8.44   | 3.41   | 0.40  | 0.47  | 0.37  |
| Zambia                        | 11.4   | 16.93  | 5.77   | 12.67  | 15.66  | 9.66   | 0.60  | 0.45  | 1.28  |
| Zimbabwe                      | 4.23   | 5.47   | 2.97   | 4.31   | 4.81   | 3.79   | -0.16 | -0.27 | 0.04  |
| <b>Ischemic heart disease</b> |        |        |        |        |        |        |       |       |       |
| Afghanistan                   | 167.76 | 181.49 | 154.68 | 172.94 | 184.35 | 162.22 | 0.45  | 0.48  | 0.44  |
| Albania                       | 94.73  | 75.10  | 113.42 | 197.67 | 164.39 | 231.48 | 0.52  | 0.60  | 0.46  |
| Algeria                       | 64.78  | 63.24  | 66.27  | 88.02  | 85.53  | 90.48  | 0.48  | 0.46  | 0.49  |
| American Samoa                | 63.36  | 38.76  | 86.64  | 59.96  | 53.10  | 66.78  | 0.19  | 0.36  | 0.14  |
| Andorra                       | 126.08 | 103.23 | 150.17 | 137.73 | 106.94 | 169.82 | -0.10 | -0.11 | -0.11 |
| Angola                        | 55.12  | 54.21  | 56.05  | 43.37  | 48.70  | 37.97  | 0.64  | 0.76  | 0.51  |
| Antigua and Barbuda           | 111.24 | 114.01 | 108.27 | 93.75  | 94.16  | 93.30  | -0.06 | -0.05 | -0.08 |
| Argentina                     | 162.67 | 141.13 | 185.05 | 144.78 | 144.35 | 145.24 | -0.13 | -0.10 | -0.15 |
| Armenia                       | 216.61 | 210.12 | 223.49 | 328.31 | 303.37 | 357.04 | 0.15  | 0.10  | 0.20  |
| Australia                     | 201.71 | 184.92 | 218.58 | 131.22 | 125.78 | 136.68 | -0.32 | -0.31 | -0.32 |
| Austria                       | 271.52 | 271.81 | 271.20 | 220.71 | 230.09 | 210.87 | -0.08 | -0.04 | -0.13 |
| Azerbaijan                    | 220.85 | 218.49 | 223.31 | 236.44 | 207.89 | 265.32 | 0.31  | 0.24  | 0.39  |
| Bahrain                       | 92.05  | 80.41  | 100.62 | 40.38  | 35.32  | 43.48  | -0.25 | -0.28 | -0.23 |
| Bangladesh                    | 27.44  | 27.46  | 27.42  | 87.47  | 74.64  | 100.05 | 4.41  | 4.22  | 4.62  |
| Barbados                      | 147.11 | 143.22 | 151.30 | 125.62 | 127.05 | 124.06 | -0.30 | -0.29 | -0.30 |
| Belarus                       | 418.18 | 454.15 | 377.45 | 664.22 | 673.00 | 654.04 | 0.15  | 0.16  | 0.17  |
| Belgium                       | 238.24 | 229.29 | 247.60 | 161.09 | 152.41 | 170.12 | -0.29 | -0.31 | -0.27 |
| Belize                        | 78.70  | 74.33  | 83.00  | 58.51  | 46.74  | 70.35  | -0.18 | -0.21 | -0.16 |
| Benin                         | 42.7   | 43.48  | 41.86  | 49.11  | 46.19  | 52.04  | 0.92  | 0.79  | 1.02  |
| Bermuda                       | 197.82 | 144.70 | 251.61 | 119.22 | 94.99  | 143.91 | -0.29 | -0.27 | -0.30 |
| Bhutan                        | 65.50  | 67.32  | 63.81  | 87.86  | 76.67  | 97.49  | 1.39  | 1.38  | 1.42  |
| Bolivia                       | 63.03  | 66.05  | 60.03  | 78.89  | 87.55  | 70.25  | 0.90  | 0.94  | 0.84  |
| Bosnia and Herzegovina        | 167.99 | 152.85 | 183.14 | 175.76 | 164.94 | 186.69 | -0.20 | -0.21 | -0.19 |
| Botswana                      | 43.14  | 44.54  | 41.71  | 65.54  | 60.81  | 70.27  | 0.01  | -0.03 | 0.07  |

|                                  |        |        |        |        |        |        |       |       |       |
|----------------------------------|--------|--------|--------|--------|--------|--------|-------|-------|-------|
| Brazil                           | 84.44  | 73.49  | 95.57  | 94.33  | 83.75  | 105.27 | 0.04  | 0.02  | 0.04  |
| Brunei                           | 45.48  | 34.69  | 55.13  | 56.00  | 41.94  | 69.22  | 0.11  | 0.09  | 0.12  |
| Bulgaria                         | 403.17 | 371.62 | 435.61 | 474.96 | 458.83 | 491.89 | -0.04 | -0.05 | -0.04 |
| Burkina Faso                     | 36.9   | 36.46  | 37.36  | 39.76  | 43.33  | 36.14  | 0.96  | 1.09  | 0.81  |
| Burundi                          | 59.36  | 57.08  | 61.73  | 30.62  | 29.48  | 31.78  | 0.19  | 0.23  | 0.17  |
| Cambodia                         | 85.72  | 85.03  | 86.45  | 87.05  | 77.12  | 97.48  | 0.94  | 0.83  | 1.06  |
| Cameroon                         | 42.85  | 46.59  | 39.07  | 46.01  | 43.24  | 48.77  | 0.30  | 0.14  | 0.46  |
| Canada                           | 184.15 | 159.74 | 208.99 | 142.47 | 131.94 | 153.14 | -0.30 | -0.30 | -0.29 |
| Cape Verde                       | 44.26  | 37.51  | 51.73  | 61.85  | 62.56  | 61.13  | 0.78  | 1.14  | 0.52  |
| Central African Republic         | 75.71  | 70.93  | 80.66  | 76.36  | 67.70  | 85.26  | 0.14  | 0.04  | 0.19  |
| Chad                             | 32.47  | 33.8   | 31.11  | 35.56  | 33.41  | 37.7   | 0.54  | 0.38  | 0.66  |
| Chile                            | 104.18 | 96.44  | 112.13 | 85.09  | 79.64  | 90.69  | -0.25 | -0.32 | -0.19 |
| China                            | 52.24  | 49.67  | 54.68  | 105.62 | 91.49  | 118.93 | 1.28  | 1.43  | 1.20  |
| Colombia                         | 68.97  | 62.69  | 75.34  | 78.71  | 71.69  | 85.96  | 0.24  | 0.15  | 0.32  |
| Comoros                          | 45.22  | 38.12  | 52.27  | 28.65  | 27.16  | 30.11  | 0.33  | 0.50  | 0.24  |
| Congo                            | 92.83  | 97.11  | 88.53  | 67.61  | 86.09  | 49.15  | 0.06  | 0.09  | -0.03 |
| Costa Rica                       | 71.19  | 63.38  | 78.87  | 76.76  | 67.41  | 86.10  | -0.13 | -0.16 | -0.11 |
| Cote d'Ivoire                    | 50.48  | 43.64  | 56.78  | 51.48  | 42.21  | 60.44  | 0.33  | 0.29  | 0.33  |
| Croatia                          | 275.61 | 262.48 | 289.56 | 333.85 | 363.14 | 302.42 | 0.06  | 0.14  | -0.02 |
| Cuba                             | 197.05 | 173.92 | 219.83 | 212.15 | 201.46 | 222.75 | -0.21 | -0.19 | -0.23 |
| Cyprus                           | 221.17 | 161.38 | 282.48 | 120.46 | 76.82  | 167.12 | -0.28 | -0.33 | -0.25 |
| Czech Republic                   | 406.28 | 385.56 | 428.24 | 317.87 | 329.30 | 306.07 | -0.06 | -0.01 | -0.12 |
| Democratic Republic of the Congo | 35.79  | 39.19  | 32.31  | 36.42  | 36.03  | 36.81  | 0.57  | 0.46  | 0.76  |
| Denmark                          | 339.50 | 312.56 | 367.22 | 146.94 | 135.71 | 158.36 | -0.46 | -0.46 | -0.46 |
| Djibouti                         | 36.75  | 24.77  | 48.59  | 54.69  | 40.22  | 69.04  | 0.67  | 0.89  | 0.56  |
| Dominica                         | 98.00  | 104.22 | 91.74  | 105.29 | 102.32 | 108.31 | -0.19 | -0.16 | -0.20 |
| Dominican Republic               | 60.87  | 52.22  | 69.42  | 124.10 | 115.80 | 132.46 | 0.76  | 0.90  | 0.65  |
| Ecuador                          | 53.69  | 48.29  | 59.02  | 66.93  | 58.74  | 75.12  | 0.24  | 0.22  | 0.26  |
| Egypt                            | 137.48 | 133.77 | 141.17 | 138.06 | 121.14 | 154.63 | 0.41  | 0.37  | 0.44  |
| El Salvador                      | 71.46  | 68.11  | 74.97  | 100.02 | 97.35  | 103.04 | 0.49  | 0.45  | 0.49  |
| Equatorial Guinea                | 94.90  | 97.38  | 92.53  | 49.33  | 51.10  | 47.65  | 0.08  | 0.11  | 0.06  |
| Eritrea                          | 28.25  | 24.75  | 31.79  | 35.84  | 37.54  | 34.14  | 0.97  | 1.22  | 0.75  |
| Estonia                          | 455.30 | 479.74 | 427.50 | 390.09 | 433.22 | 339.44 | -0.09 | -0.09 | -0.09 |
| Ethiopia                         | 69.26  | 63.31  | 75.25  | 48.30  | 44.72  | 51.90  | 1.03  | 0.99  | 1.04  |
| Federated States of Micronesia   | 96.10  | 75.00  | 116.29 | 120.43 | 96.68  | 143.06 | 0.41  | 0.41  | 0.42  |
| Fiji                             | 109.18 | 55.40  | 161.29 | 167.83 | 109.61 | 224.12 | 0.07  | 0.28  | 0.03  |
| Finland                          | 315.70 | 292.73 | 340.07 | 236.13 | 225.44 | 247.15 | -0.23 | -0.22 | -0.24 |
| France                           | 143.75 | 136.02 | 151.90 | 129.15 | 122    | 136.77 | -0.13 | -0.15 | -0.12 |
| Gabon                            | 103.59 | 98.49  | 108.90 | 66.85  | 74.07  | 59.79  | 0.01  | 0.12  | -0.10 |
| Georgia                          | 373.05 | 373.28 | 372.80 | 410.02 | 367.79 | 456.20 | -0.15 | -0.17 | -0.12 |
| Germany                          | 342.59 | 350.35 | 334.25 | 244.45 | 243.62 | 245.31 | -0.27 | -0.26 | -0.27 |
| Ghana                            | 45.05  | 58.68  | 31.86  | 55.71  | 62.36  | 49.00  | 0.82  | 0.68  | 1.12  |
| Greece                           | 220.67 | 191.60 | 250.49 | 277.86 | 271.12 | 284.93 | 0.03  | 0.13  | -0.04 |
| Greenland                        | 77.96  | 55.90  | 97.05  | 71.34  | 40.82  | 97.80  | 0.09  | -0.04 | 0.13  |
| Grenada                          | 141.60 | 140.26 | 142.97 | 111.84 | 114.09 | 109.61 | -0.22 | -0.20 | -0.24 |
| Guam                             | 80.74  | 59.06  | 99.67  | 232.73 | 199.12 | 265.39 | 0.51  | 0.67  | 0.43  |
| Guatemala                        | 45.56  | 43.77  | 47.37  | 49.39  | 51.41  | 47.29  | 0.60  | 0.70  | 0.49  |
| Guinea                           | 44.04  | 51.37  | 36.55  | 50.50  | 49.63  | 51.37  | 0.90  | 0.67  | 1.21  |
| Guinea-Bissau                    | 57.26  | 62.20  | 52.19  | 60.88  | 63.27  | 58.46  | 0.53  | 0.46  | 0.63  |
| Guyana                           | 109.23 | 90.24  | 128.83 | 132.79 | 108.81 | 156.54 | 0.19  | 0.23  | 0.16  |
| Haiti                            | 129.66 | 140.11 | 118.89 | 102.20 | 109.45 | 94.80  | 0.28  | 0.24  | 0.32  |
| Honduras                         | 71.89  | 72.16  | 71.63  | 115.05 | 122.85 | 107.25 | 0.66  | 0.64  | 0.68  |
| Hungary                          | 379.03 | 349.03 | 411.48 | 350.62 | 377.03 | 321.50 | 0.07  | 0.14  | -0.01 |
| Iceland                          | 194.97 | 165.43 | 224.25 | 131.03 | 96.18  | 166.62 | -0.22 | -0.27 | -0.20 |
| India                            | 91.56  | 76.44  | 105.63 | 122.76 | 96.29  | 147.36 | 0.84  | 0.92  | 0.76  |
| Indonesia                        | 65.51  | 62.28  | 68.71  | 87.50  | 72.67  | 102.12 | 0.64  | 0.50  | 0.75  |
| Iran                             | 90.10  | 69.50  | 109.95 | 125.80 | 90.82  | 160.27 | 0.91  | 1.04  | 0.84  |
| Iraq                             | 147.26 | 145.54 | 148.96 | 122.76 | 111.66 | 133.57 | 0.02  | 0.04  | 0.00  |
| Ireland                          | 210.81 | 182.88 | 238.99 | 120.76 | 99.57  | 142.58 | -0.27 | -0.27 | -0.28 |
| Israel                           | 167.75 | 150.75 | 184.81 | 83.05  | 76.71  | 89.49  | -0.47 | -0.48 | -0.45 |
| Italy                            | 185.05 | 168.02 | 203.12 | 188.07 | 186.46 | 189.78 | -0.11 | -0.09 | -0.12 |
| Jamaica                          | 78.60  | 79.54  | 77.63  | 86.07  | 87.76  | 84.36  | -0.15 | -0.09 | -0.20 |
| Japan                            | 95.13  | 90.96  | 99.46  | 127.26 | 129.80 | 124.58 | -0.18 | -0.16 | -0.20 |
| Jordan                           | 79.58  | 71.72  | 86.69  | 47.18  | 32.39  | 61.24  | 0.01  | -0.12 | 0.08  |
| Kazakhstan                       | 211.46 | 224.41 | 197.71 | 239.71 | 226.76 | 253.59 | 0.13  | 0.10  | 0.18  |
| Kenya                            | 15.64  | 13.35  | 17.94  | 17.74  | 14.32  | 21.15  | 0.46  | 0.46  | 0.44  |
| Kiribati                         | 85.34  | 70.41  | 100.59 | 93.58  | 66.60  | 121.26 | 0.38  | 0.31  | 0.41  |
| Kuwait                           | 43.44  | 26.75  | 58.03  | 40.99  | 18.9   | 58.23  | 0.27  | -0.04 | 0.38  |
| Kyrgyzstan                       | 171.83 | 182.86 | 160.33 | 188.30 | 177.19 | 199.64 | 0.42  | 0.42  | 0.47  |
| Laos                             | 116.52 | 124.65 | 108.38 | 85.25  | 78.23  | 92.35  | 0.79  | 0.64  | 0.97  |

|                                  |        |        |        |        |        |        |       |       |       |
|----------------------------------|--------|--------|--------|--------|--------|--------|-------|-------|-------|
| Latvia                           | 463.26 | 477.36 | 447.02 | 444.60 | 471.04 | 413.82 | -0.03 | -0.03 | -0.03 |
| Lebanon                          | 190.98 | 140.80 | 242.55 | 141.74 | 119.89 | 163.37 | 0.09  | 0.10  | 0.11  |
| Lesotho                          | 53.05  | 46.34  | 60.15  | 96.29  | 96.54  | 96.05  | 0.03  | 0.10  | -0.04 |
| Liberia                          | 35.8   | 39.96  | 31.61  | 38.27  | 43.79  | 32.83  | 1.48  | 1.34  | 1.64  |
| Libya                            | 59.69  | 56.74  | 62.34  | 87.22  | 79.81  | 94.54  | 0.21  | 0.30  | 0.15  |
| Lithuania                        | 427.29 | 438.80 | 414.49 | 449.09 | 467.24 | 427.97 | -0.09 | -0.09 | -0.10 |
| Luxembourg                       | 223.27 | 206.50 | 240.72 | 110.66 | 108.24 | 113.08 | -0.25 | -0.25 | -0.25 |
| Macedonia                        | 145.68 | 113.27 | 177.71 | 184.30 | 157.48 | 211.35 | 0.08  | 0.14  | 0.04  |
| Madagascar                       | 51.11  | 37.68  | 64.58  | 48.06  | 36.37  | 59.83  | 0.56  | 0.62  | 0.50  |
| Malawi                           | 34.25  | 39.25  | 29.07  | 32.12  | 30.99  | 33.26  | 0.80  | 0.57  | 1.13  |
| Malaysia                         | 85.82  | 71.08  | 100.13 | 103.22 | 67.16  | 139.94 | 0.11  | 0.03  | 0.14  |
| Maldives                         | 65.01  | 51.15  | 78.17  | 59.75  | 37.24  | 82.13  | 1.14  | 1.11  | 1.09  |
| Mali                             | 49.87  | 62.07  | 37.41  | 33.54  | 41.83  | 25.41  | 0.22  | 0.22  | 0.24  |
| Malta                            | 191.64 | 157.43 | 227.07 | 181.41 | 163.17 | 199.80 | -0.18 | -0.14 | -0.20 |
| Marshall Islands                 | 73.25  | 50.86  | 94.66  | 108.77 | 82.46  | 134.17 | 0.46  | 0.51  | 0.46  |
| Mauritania                       | 49.01  | 52.13  | 45.87  | 34.79  | 39.32  | 30.32  | 0.33  | 0.35  | 0.27  |
| Mauritius                        | 165.00 | 136.00 | 194.11 | 148.11 | 129.10 | 167.60 | -0.29 | -0.29 | -0.28 |
| Mexico                           | 47.68  | 43.79  | 51.61  | 77.98  | 74.29  | 81.72  | 0.57  | 0.53  | 0.60  |
| Moldova                          | 322.09 | 344.25 | 297.78 | 352.86 | 364.69 | 340.07 | 0.16  | 0.15  | 0.17  |
| Mongolia                         | 133.22 | 130.03 | 136.49 | 150.23 | 125.46 | 175.50 | 0.33  | 0.33  | 0.36  |
| Montenegro                       | 159.55 | 145.91 | 173.31 | 221.11 | 174.18 | 269.15 | 0.12  | 0.09  | 0.14  |
| Morocco                          | 66.36  | 66.34  | 66.38  | 87.73  | 88.11  | 87.35  | 0.50  | 0.48  | 0.51  |
| Mozambique                       | 29.5   | 27.89  | 31.25  | 40.35  | 36.81  | 44.06  | 1.09  | 0.98  | 1.14  |
| Myanmar                          | 48.26  | 48.28  | 48.25  | 51.01  | 44.4   | 57.93  | 0.53  | 0.46  | 0.62  |
| Namibia                          | 64.79  | 60.35  | 69.42  | 51.43  | 47.13  | 55.96  | -0.10 | -0.06 | -0.13 |
| Nepal                            | 71.80  | 77.44  | 66.07  | 90.68  | 82.52  | 99.37  | 1.21  | 1.08  | 1.38  |
| Netherlands                      | 199.98 | 168.00 | 232.67 | 118.45 | 102.98 | 134.18 | -0.40 | -0.40 | -0.39 |
| New Zealand                      | 212.24 | 181.08 | 244.35 | 144.47 | 131.94 | 157.46 | -0.24 | -0.22 | -0.25 |
| Nicaragua                        | 30.49  | 28.26  | 32.75  | 61.59  | 61.58  | 61.60  | 1.37  | 1.55  | 1.20  |
| Niger                            | 28.21  | 27.46  | 28.99  | 31.6   | 28.89  | 34.26  | 1.40  | 1.28  | 1.51  |
| Nigeria                          | 30.61  | 34.26  | 27.02  | 21     | 18.9   | 23.01  | 0.27  | 0.08  | 0.55  |
| North Korea                      | 50.70  | 55.68  | 45.43  | 105.47 | 112.86 | 97.75  | 0.55  | 0.56  | 0.56  |
| Northern Mariana Islands         | 32.77  | 28.2   | 36.88  | 27.68  | 17.37  | 38.07  | 0.18  | 0.08  | 0.23  |
| Norway                           | 304.53 | 251.13 | 359.14 | 141.56 | 137.80 | 145.27 | -0.38 | -0.34 | -0.41 |
| Oman                             | 52.48  | 55.36  | 50.18  | 48.79  | 49.06  | 48.66  | 0.49  | 0.49  | 0.54  |
| Pakistan                         | 121.53 | 109.36 | 132.83 | 156.57 | 136.24 | 175.82 | 0.64  | 0.70  | 0.60  |
| Palestine                        | 65.18  | 53.57  | 76.51  | 75.44  | 50.83  | 99.36  | 0.52  | 0.42  | 0.57  |
| Panama                           | 70.62  | 62.72  | 78.34  | 75.24  | 66.99  | 83.44  | -0.09 | -0.09 | -0.09 |
| Papua New Guinea                 | 71.10  | 57.73  | 83.87  | 98.75  | 88.38  | 108.71 | 0.66  | 0.77  | 0.61  |
| Paraguay                         | 59.38  | 58.41  | 60.34  | 81.86  | 72.53  | 90.92  | 0.07  | 0.04  | 0.10  |
| Peru                             | 55.79  | 53.81  | 57.77  | 46.94  | 46.7   | 47.18  | 0.28  | 0.26  | 0.30  |
| Philippines                      | 61.20  | 48.85  | 73.30  | 91.47  | 73.95  | 108.67 | 0.58  | 0.59  | 0.58  |
| Poland                           | 360.08 | 333.56 | 387.98 | 270.56 | 265.72 | 275.77 | -0.23 | -0.19 | -0.26 |
| Portugal                         | 170.49 | 159.22 | 182.62 | 122.55 | 118.12 | 127.27 | -0.23 | -0.21 | -0.25 |
| Puerto Rico                      | 172.34 | 148.51 | 197.66 | 152.80 | 153.19 | 152.39 | -0.24 | -0.26 | -0.24 |
| Qatar                            | 47.95  | 47.37  | 48.23  | 21.81  | 15.79  | 24.06  | -0.19 | -0.35 | -0.13 |
| Romania                          | 298.32 | 280.68 | 316.46 | 363.89 | 347.88 | 380.92 | -0.01 | 0.00  | -0.02 |
| Russia                           | 340.45 | 371.24 | 305.49 | 439.32 | 436.68 | 442.42 | 0.06  | 0.03  | 0.11  |
| Rwanda                           | 40.05  | 37.8   | 42.38  | 29.94  | 27.39  | 32.71  | 0.68  | 0.64  | 0.69  |
| Saint Lucia                      | 104.93 | 96.53  | 113.58 | 97.27  | 99.32  | 95.14  | -0.13 | -0.07 | -0.19 |
| Saint Vincent and the Grenadines | 117.12 | 130.48 | 103.63 | 142.56 | 147.13 | 138.07 | 0.01  | 0.04  | 0.01  |
| Samoa                            | 76.56  | 58.69  | 93.03  | 101.21 | 108.61 | 94.26  | 0.25  | 0.39  | 0.18  |
| Sao Tome and Principe            | 53.41  | 61.36  | 45.31  | 48.2   | 60.16  | 36.14  | 0.44  | 0.51  | 0.31  |
| Saudi Arabia                     | 48.92  | 47.55  | 50.00  | 49.79  | 36.62  | 59.90  | 0.68  | 0.52  | 0.79  |
| Senegal                          | 34.6   | 32.1   | 37.12  | 41.07  | 40.91  | 41.23  | 1.03  | 1.13  | 0.92  |
| Serbia                           | 221.53 | 209.00 | 234.41 | 281.67 | 278.67 | 284.80 | -0.02 | 0.00  | -0.04 |
| Seychelles                       | 130.70 | 112.01 | 149.47 | 105.85 | 98.65  | 112.86 | -0.11 | -0.06 | -0.15 |
| Sierra Leone                     | 38.72  | 28.92  | 48.73  | 43.38  | 44.55  | 42.19  | 0.80  | 1.32  | 0.52  |
| Singapore                        | 105.88 | 90.98  | 120.38 | 100.27 | 90.59  | 110.30 | -0.18 | -0.21 | -0.14 |
| Slovakia                         | 377.18 | 351.84 | 403.73 | 292.75 | 312.92 | 271.46 | -0.10 | -0.06 | -0.16 |
| Slovenia                         | 176.76 | 172.14 | 181.66 | 172.48 | 186.46 | 158.25 | -0.02 | 0.01  | -0.07 |
| Solomon Islands                  | 95.89  | 72.84  | 117.71 | 116.39 | 93.04  | 139.01 | 0.40  | 0.42  | 0.41  |
| Somalia                          | 46.73  | 41.52  | 52.04  | 40.13  | 37.6   | 42.68  | 0.29  | 0.36  | 0.25  |
| South Africa                     | 77.15  | 95.58  | 58.30  | 83.98  | 92.60  | 75.06  | -0.07 | -0.14 | 0.06  |
| South Korea                      | 81.20  | 83.25  | 79.15  | 59.74  | 65.08  | 54.34  | -0.36 | -0.33 | -0.39 |
| South Sudan                      | 35.55  | 33.24  | 37.87  | 41.91  | 43.09  | 40.73  | 0.79  | 0.95  | 0.66  |
| Spain                            | 164.65 | 153.47 | 176.29 | 124.67 | 122.61 | 126.78 | -0.23 | -0.23 | -0.23 |
| Sri Lanka                        | 112.62 | 79.51  | 145.09 | 114.88 | 89.80  | 141.84 | 0.09  | 0.08  | 0.10  |
| Sudan                            | 115.64 | 105.96 | 125.25 | 100.51 | 89.26  | 111.67 | 0.52  | 0.52  | 0.52  |
| Suriname                         | 102.80 | 93.47  | 111.84 | 95.32  | 82.93  | 107.67 | -0.15 | -0.15 | -0.14 |

|                          |        |        |        |        |        |        |       |       |       |
|--------------------------|--------|--------|--------|--------|--------|--------|-------|-------|-------|
| Swaziland                | 43.27  | 41.16  | 45.63  | 75.96  | 73.69  | 78.28  | 0.11  | 0.09  | 0.11  |
| Sweden                   | 357.09 | 314.21 | 401.01 | 220.49 | 214.28 | 226.71 | -0.27 | -0.25 | -0.29 |
| Switzerland              | 213.24 | 197.91 | 229.30 | 145.59 | 140.27 | 151.04 | -0.20 | -0.21 | -0.19 |
| Syria                    | 104.82 | 93.34  | 115.93 | 114.80 | 98.98  | 130.23 | -0.17 | 0.07  | -0.29 |
| Taiwan                   | 65.94  | 48.64  | 82.01  | 81.83  | 67.84  | 95.87  | -0.07 | 0.04  | -0.13 |
| Tajikistan               | 143.89 | 146.25 | 141.49 | 109.13 | 97.22  | 120.76 | 0.41  | 0.33  | 0.49  |
| Tanzania                 | 36.54  | 34.21  | 38.91  | 37.74  | 34.57  | 40.95  | 0.73  | 0.71  | 0.71  |
| Thailand                 | 68.39  | 56.61  | 80.40  | 90.43  | 72.68  | 108.70 | -0.16 | -0.13 | -0.18 |
| The Bahamas              | 87.78  | 79.71  | 95.96  | 101.92 | 96.57  | 107.50 | 0.01  | -0.02 | 0.03  |
| The Gambia               | 34.31  | 35.69  | 32.94  | 29.25  | 26.47  | 32.09  | 0.56  | 0.54  | 0.66  |
| Timor-Leste              | 43.64  | 42.74  | 44.51  | 58.31  | 60.50  | 56.18  | 1.81  | 1.94  | 1.70  |
| Togo                     | 41.03  | 42.01  | 40.03  | 43.85  | 35.39  | 52.50  | 0.47  | 0.29  | 0.63  |
| Tonga                    | 74.78  | 57.70  | 91.44  | 100.35 | 79.13  | 121.45 | 0.22  | 0.26  | 0.19  |
| Trinidad and Tobago      | 147.52 | 133.09 | 162.05 | 168.36 | 146.66 | 190.63 | -0.06 | -0.04 | -0.07 |
| Tunisia                  | 51.39  | 41.29  | 61.37  | 72.68  | 57.59  | 88.12  | 0.41  | 0.46  | 0.38  |
| Turkey                   | 151.03 | 119.77 | 183.06 | 80.04  | 65.92  | 94.66  | -0.08 | -0.03 | -0.11 |
| Turkmenistan             | 186.04 | 184.75 | 187.37 | 197.72 | 178.48 | 217.61 | 0.49  | 0.46  | 0.52  |
| Uganda                   | 24.29  | 23.82  | 24.77  | 25.98  | 22.43  | 29.53  | 1.07  | 0.90  | 1.20  |
| Ukraine                  | 448.49 | 498.85 | 389.89 | 721.22 | 757.88 | 677.91 | 0.30  | 0.29  | 0.35  |
| United Arab Emirates     | 50.64  | 38.73  | 56.82  | 56.84  | 23.74  | 68.90  | 0.45  | 0.10  | 0.47  |
| United Kingdom           | 308.79 | 274.36 | 345.20 | 153.15 | 132.52 | 174.29 | -0.40 | -0.42 | -0.38 |
| United States            | 236.27 | 221.24 | 252.07 | 164.46 | 153.49 | 175.80 | -0.28 | -0.31 | -0.25 |
| Uruguay                  | 209.46 | 186.11 | 234.26 | 149.08 | 150.66 | 147.38 | -0.36 | -0.36 | -0.36 |
| Uzbekistan               | 174.28 | 183.24 | 165.12 | 195.74 | 187.87 | 203.88 | 0.31  | 0.28  | 0.36  |
| Vanuatu                  | 116.04 | 79.46  | 150.62 | 137.94 | 105.41 | 169.67 | 0.29  | 0.34  | 0.28  |
| Venezuela                | 79.46  | 70.09  | 88.69  | 100.75 | 85.85  | 115.77 | 0.03  | 0.05  | 0.01  |
| Vietnam                  | 63.40  | 69.17  | 57.45  | 78.66  | 81.27  | 76.00  | 0.30  | 0.25  | 0.37  |
| Virgin Islands, U.S.     | 132.40 | 117.04 | 148.66 | 285.85 | 247.42 | 328.10 | 0.01  | -0.01 | 0.02  |
| Yemen                    | 121.20 | 131.80 | 110.41 | 104.53 | 105.23 | 103.85 | 0.65  | 0.58  | 0.75  |
| Zambia                   | 34.89  | 42.15  | 27.52  | 54.74  | 48.03  | 61.48  | 1.24  | 0.76  | 1.99  |
| Zimbabwe                 | 29.05  | 37.88  | 20.14  | 36.15  | 40.14  | 32.05  | 0.02  | -0.12 | 0.28  |
| <b>Ischemic stroke</b>   |        |        |        |        |        |        |       |       |       |
| Afghanistan              | 35.84  | 48.91  | 23.4   | 44.60  | 58.87  | 31.2   | 0.77  | 0.79  | 0.83  |
| Albania                  | 15.04  | 16.26  | 13.87  | 27.59  | 28.05  | 27.12  | 0.34  | 0.28  | 0.40  |
| Algeria                  | 19.45  | 21.72  | 17.23  | 32.03  | 35.19  | 28.91  | 0.79  | 0.76  | 0.84  |
| American Samoa           | 17.34  | 14.57  | 19.95  | 11.08  | 12.12  | 10.05  | -0.20 | -0.17 | -0.25 |
| Andorra                  | 40     | 43.45  | 36.37  | 39.24  | 40.57  | 37.85  | -0.19 | -0.19 | -0.17 |
| Angola                   | 21     | 26.25  | 15.62  | 16.21  | 21.22  | 11.13  | 0.61  | 0.62  | 0.57  |
| Antigua and Barbuda      | 58.24  | 68.59  | 47.17  | 29.56  | 33.37  | 25.4   | -0.44 | -0.44 | -0.42 |
| Argentina                | 54.97  | 54.79  | 55.16  | 31.5   | 35.76  | 27.06  | -0.44 | -0.43 | -0.47 |
| Armenia                  | 49.13  | 57.82  | 39.91  | 75.23  | 80.06  | 69.67  | 0.16  | 0.06  | 0.31  |
| Australia                | 38.73  | 45.09  | 32.34  | 30.18  | 35.17  | 25.18  | -0.18 | -0.21 | -0.15 |
| Austria                  | 94.68  | 117.45 | 69.87  | 40.29  | 49.83  | 30.27  | -0.52 | -0.52 | -0.51 |
| Azerbaijan               | 23.23  | 26.54  | 19.76  | 24.34  | 23.78  | 24.91  | 0.29  | 0.18  | 0.49  |
| Bahrain                  | 8.18   | 10.23  | 6.67   | 5.45   | 7.26   | 4.34   | 0.15  | 0.18  | 0.16  |
| Bangladesh               | 24.42  | 28.21  | 20.8   | 44.42  | 46.36  | 42.51  | 2.11  | 2.20  | 2.16  |
| Barbados                 | 72.05  | 83     | 60.26  | 54     | 63.34  | 43.84  | -0.38 | -0.39 | -0.38 |
| Belarus                  | 121.03 | 149.48 | 88.81  | 161.62 | 185.55 | 133.87 | -0.03 | -0.03 | 0.02  |
| Belgium                  | 70.67  | 86.38  | 54.22  | 42.51  | 50.27  | 34.45  | -0.37 | -0.40 | -0.33 |
| Belize                   | 23.29  | 25.28  | 21.34  | 15.34  | 14.34  | 16.34  | -0.28 | -0.28 | -0.24 |
| Benin                    | 17.07  | 21.3   | 12.57  | 17.78  | 21.73  | 13.81  | 0.75  | 0.74  | 0.81  |
| Bermuda                  | 35.95  | 37.23  | 34.65  | 25.78  | 27.15  | 24.39  | -0.15 | -0.19 | -0.14 |
| Bhutan                   | 12.98  | 13.93  | 12.11  | 17.51  | 16.44  | 18.42  | 1.42  | 1.51  | 1.42  |
| Bolivia                  | 22     | 25.56  | 18.46  | 27.11  | 31.64  | 22.6   | 0.87  | 0.82  | 0.93  |
| Bosnia and Herzegovina   | 51.21  | 60.05  | 42.37  | 116.31 | 126.21 | 106.33 | 0.74  | 0.54  | 1.01  |
| Botswana                 | 16.4   | 20.85  | 11.85  | 23.37  | 28.17  | 18.55  | -0.04 | -0.02 | 0.02  |
| Brazil                   | 20.78  | 19.7   | 21.88  | 22.79  | 21.71  | 23.9   | 0.02  | -0.01 | 0.03  |
| Brunei                   | 13.7   | 14.13  | 13.31  | 14.21  | 14.49  | 13.94  | -0.06 | -0.07 | -0.06 |
| Bulgaria                 | 132.79 | 139.97 | 125.41 | 180.36 | 198.62 | 161.20 | 0.11  | 0.10  | 0.09  |
| Burkina Faso             | 11.01  | 13.41  | 8.51   | 9.51   | 12.6   | 6.38   | 0.59  | 0.68  | 0.42  |
| Burundi                  | 35.86  | 44.79  | 26.61  | 16.04  | 19.47  | 12.55  | 0.03  | 0.03  | 0.06  |
| Cambodia                 | 18.4   | 22.7   | 13.79  | 22.42  | 23.8   | 20.96  | 1.37  | 1.20  | 1.82  |
| Cameroon                 | 19.32  | 23.83  | 14.76  | 21.54  | 25.7   | 17.38  | 0.37  | 0.35  | 0.41  |
| Canada                   | 37.51  | 42.61  | 32.32  | 34.8   | 40.12  | 29.4   | -0.16 | -0.20 | -0.12 |
| Cape Verde               | 33.9   | 36.77  | 30.72  | 32.91  | 37.04  | 28.66  | 0.24  | 0.30  | 0.21  |
| Central African Republic | 38.27  | 46.06  | 30.22  | 37.9   | 45.55  | 30.04  | 0.12  | 0.10  | 0.14  |
| Chad                     | 16.57  | 21.16  | 11.91  | 16.59  | 20.57  | 12.62  | 0.41  | 0.38  | 0.47  |
| Chile                    | 45.87  | 46.81  | 44.9   | 41.06  | 45.96  | 36.03  | -0.18 | -0.19 | -0.19 |
| China                    | 34.32  | 34.4   | 34.24  | 55.08  | 47.39  | 62.32  | 0.81  | 0.84  | 0.84  |
| Colombia                 | 14.85  | 15.81  | 13.88  | 13.08  | 14.1   | 12.02  | -0.04 | -0.11 | 0.00  |

|                                  |        |        |        |        |        |        |       |       |       |
|----------------------------------|--------|--------|--------|--------|--------|--------|-------|-------|-------|
| Comoros                          | 21.66  | 27.67  | 15.68  | 12.94  | 16.57  | 9.38   | 0.26  | 0.27  | 0.29  |
| Congo                            | 35.34  | 45.12  | 25.5   | 27.09  | 39.85  | 14.35  | 0.13  | 0.10  | -0.01 |
| Costa Rica                       | 15.77  | 16.54  | 15     | 14.5   | 15.66  | 13.34  | -0.26 | -0.25 | -0.27 |
| Cote d'Ivoire                    | 16.97  | 19.54  | 14.59  | 18.56  | 20.67  | 16.52  | 0.43  | 0.42  | 0.43  |
| Croatia                          | 101.85 | 115.17 | 87.70  | 112.36 | 133.79 | 89.36  | -0.03 | -0.05 | -0.04 |
| Cuba                             | 42.3   | 44.16  | 40.47  | 62.27  | 67.88  | 56.71  | 0.08  | 0.08  | 0.07  |
| Cyprus                           | 52.17  | 50.2   | 54.18  | 24.85  | 23.72  | 26.06  | -0.36 | -0.33 | -0.38 |
| Czech Republic                   | 149.73 | 176.07 | 121.80 | 86.42  | 105.87 | 66.35  | -0.31 | -0.30 | -0.33 |
| Democratic Republic of the Congo | 18.65  | 26.22  | 10.89  | 19.15  | 24.22  | 14.06  | 0.60  | 0.48  | 0.98  |
| Denmark                          | 64.98  | 74.19  | 55.5   | 40.91  | 45.99  | 35.76  | -0.21 | -0.23 | -0.19 |
| Djibouti                         | 14.3   | 15.8   | 12.81  | 20.43  | 22.43  | 18.45  | 0.61  | 0.68  | 0.59  |
| Dominica                         | 32.53  | 38.94  | 26.07  | 38.16  | 42.82  | 33.43  | -0.11 | -0.06 | -0.13 |
| Dominican Republic               | 18.89  | 18.13  | 19.64  | 31.88  | 32.11  | 31.66  | 0.46  | 0.52  | 0.40  |
| Ecuador                          | 17.78  | 17.19  | 18.36  | 19.57  | 19.23  | 19.91  | 0.10  | 0.12  | 0.08  |
| Egypt                            | 28.09  | 32.28  | 23.92  | 23.5   | 26.01  | 21.04  | 0.17  | 0.23  | 0.16  |
| El Salvador                      | 18.58  | 18.29  | 18.87  | 13.88  | 13.96  | 13.8   | -0.20 | -0.22 | -0.21 |
| Equatorial Guinea                | 44.22  | 56.85  | 32.13  | 15.31  | 18.91  | 11.89  | -0.27 | -0.27 | -0.23 |
| Eritrea                          | 15.85  | 21.38  | 10.26  | 17.36  | 24.21  | 10.54  | 0.71  | 0.68  | 0.69  |
| Estonia                          | 185.08 | 228.48 | 135.69 | 101.77 | 125.82 | 73.54  | -0.41 | -0.45 | -0.38 |
| Ethiopia                         | 24.97  | 27.96  | 21.96  | 17.46  | 20.08  | 14.83  | 1.05  | 1.07  | 1.02  |
| Federated States of Micronesia   | 29.46  | 25.52  | 33.24  | 28.57  | 25.99  | 31.03  | 0.09  | 0.12  | 0.08  |
| Fiji                             | 24.22  | 22.73  | 25.66  | 27.27  | 27.51  | 27.04  | -0.21 | -0.22 | -0.22 |
| Finland                          | 84.99  | 105.98 | 62.72  | 60.65  | 74.01  | 46.88  | -0.27 | -0.30 | -0.22 |
| France                           | 51.52  | 60.79  | 41.75  | 38.09  | 44.65  | 31.1   | -0.29 | -0.30 | -0.27 |
| Gabon                            | 39.41  | 45.58  | 32.98  | 28.53  | 37.94  | 19.33  | 0.14  | 0.25  | -0.02 |
| Georgia                          | 78.19  | 82.85  | 73.06  | 108.83 | 104.11 | 114.00 | 0.08  | 0.06  | 0.13  |
| Germany                          | 90.09  | 112.80 | 65.7   | 54.86  | 65.31  | 44.05  | -0.38 | -0.39 | -0.33 |
| Ghana                            | 21.4   | 35.22  | 8.02   | 26.86  | 39.71  | 13.88  | 0.87  | 0.79  | 1.41  |
| Greece                           | 102.09 | 121.44 | 82.25  | 95.55  | 116.27 | 73.81  | -0.23 | -0.24 | -0.24 |
| Greenland                        | 17.23  | 18.09  | 16.48  | 15.93  | 12.62  | 18.8   | 0.10  | -0.08 | 0.29  |
| Grenada                          | 67.17  | 78.74  | 55.29  | 46.76  | 57.63  | 35.95  | -0.31 | -0.28 | -0.35 |
| Guam                             | 17.91  | 17.97  | 17.86  | 36.96  | 38.38  | 35.58  | 0.08  | 0.06  | 0.07  |
| Guatemala                        | 8.81   | 9.05   | 8.57   | 11.55  | 12.86  | 10.17  | 0.94  | 1.06  | 0.78  |
| Guinea                           | 18.69  | 26.62  | 10.58  | 20.9   | 27.25  | 14.57  | 0.87  | 0.78  | 1.18  |
| Guinea-Bissau                    | 23.11  | 30.26  | 15.8   | 22.85  | 29.2   | 16.42  | 0.44  | 0.40  | 0.51  |
| Guyana                           | 52.13  | 50.28  | 54.04  | 38.67  | 36.14  | 41.18  | -0.27 | -0.27 | -0.27 |
| Haiti                            | 52.70  | 69.17  | 35.74  | 42.47  | 54.87  | 29.8   | 0.31  | 0.26  | 0.39  |
| Honduras                         | 17.48  | 18.28  | 16.68  | 30.17  | 32.75  | 27.59  | 0.80  | 0.73  | 0.86  |
| Hungary                          | 149.10 | 166.50 | 130.27 | 103.17 | 120.72 | 83.82  | -0.20 | -0.23 | -0.19 |
| Iceland                          | 37.69  | 41.9   | 33.51  | 25.53  | 26.21  | 24.83  | -0.22 | -0.21 | -0.20 |
| India                            | 24.17  | 24.8   | 23.58  | 28.1   | 26.52  | 29.58  | 0.60  | 0.65  | 0.58  |
| Indonesia                        | 22.82  | 26.76  | 18.9   | 36.15  | 41.23  | 31.13  | 0.95  | 1.01  | 0.95  |
| Iran                             | 21.21  | 18.83  | 23.49  | 28.78  | 24.25  | 33.24  | 0.86  | 1.04  | 0.79  |
| Iraq                             | 35.48  | 40.72  | 30.35  | 28.18  | 30.91  | 25.51  | -0.03 | 0.04  | -0.06 |
| Ireland                          | 41.27  | 49.24  | 33.23  | 22.94  | 26.14  | 19.64  | -0.29 | -0.29 | -0.28 |
| Israel                           | 32.77  | 35.02  | 30.51  | 21.5   | 24.45  | 18.5   | -0.29 | -0.28 | -0.31 |
| Italy                            | 79.58  | 89.85  | 68.69  | 62.35  | 75.04  | 48.86  | -0.31 | -0.31 | -0.33 |
| Jamaica                          | 60.57  | 72.23  | 48.61  | 58.53  | 67.19  | 49.79  | -0.25 | -0.24 | -0.24 |
| Japan                            | 67.65  | 72.39  | 62.75  | 80.73  | 87.64  | 73.45  | -0.27 | -0.29 | -0.26 |
| Jordan                           | 30.9   | 34.58  | 27.58  | 17.94  | 17.94  | 17.94  | -0.01 | 0.01  | 0.00  |
| Kazakhstan                       | 77.11  | 95.32  | 57.76  | 74.41  | 77.80  | 70.77  | -0.04 | -0.11 | 0.13  |
| Kenya                            | 10.34  | 12.3   | 8.37   | 9.85   | 10.9   | 8.8    | 0.23  | 0.21  | 0.29  |
| Kiribati                         | 42.60  | 33.11  | 52.29  | 45.66  | 32.2   | 59.46  | 0.35  | 0.35  | 0.33  |
| Kuwait                           | 4.83   | 5.2    | 4.5    | 7.54   | 6.69   | 8.21   | 1.11  | 0.75  | 1.52  |
| Kyrgyzstan                       | 68.46  | 80.84  | 55.55  | 48.4   | 44.89  | 51.97  | -0.08 | -0.18 | 0.11  |
| Laos                             | 25.7   | 32.02  | 19.37  | 20.11  | 22.26  | 17.94  | 0.94  | 0.88  | 1.15  |
| Latvia                           | 198.62 | 243.55 | 146.86 | 187.39 | 234.41 | 132.62 | -0.04 | -0.05 | -0.05 |
| Lebanon                          | 27.46  | 37.6   | 17.03  | 22.9   | 33.25  | 12.65  | 0.24  | 0.15  | 0.24  |
| Lesotho                          | 25.24  | 28.21  | 22.08  | 39.95  | 49.81  | 29.9   | -0.10 | -0.05 | -0.18 |
| Liberia                          | 15.35  | 19.79  | 10.9   | 15.87  | 21.06  | 10.76  | 1.40  | 1.28  | 1.51  |
| Libya                            | 11.46  | 13.47  | 9.65   | 21.21  | 23.33  | 19.11  | 0.54  | 0.61  | 0.51  |
| Lithuania                        | 97.44  | 116.46 | 76.27  | 127.92 | 153.38 | 98.30  | 0.14  | 0.13  | 0.13  |
| Luxembourg                       | 86.73  | 103.45 | 69.32  | 28.76  | 35.33  | 22.15  | -0.50 | -0.51 | -0.49 |
| Macedonia                        | 91.10  | 91.04  | 91.15  | 122.05 | 128.59 | 115.46 | 0.14  | 0.16  | 0.11  |
| Madagascar                       | 24.88  | 29.27  | 20.48  | 24     | 29.06  | 18.91  | 0.61  | 0.68  | 0.52  |
| Malawi                           | 12.32  | 16.17  | 8.34   | 11.91  | 14.19  | 9.63   | 0.87  | 0.77  | 1.16  |
| Malaysia                         | 16.28  | 16.99  | 15.6   | 18     | 15.83  | 20.2   | 0.02  | 0.03  | 0.06  |
| Maldives                         | 9.66   | 7.81   | 11.42  | 9.59   | 6.54   | 12.62  | 1.32  | 1.46  | 1.21  |
| Mali                             | 22.46  | 31     | 13.74  | 14.33  | 20.36  | 8.41   | 0.17  | 0.20  | 0.12  |
| Malta                            | 38.31  | 39.55  | 37.04  | 33.51  | 37.93  | 29.06  | -0.24 | -0.21 | -0.29 |

|                                  |        |        |        |        |        |        |       |       |       |
|----------------------------------|--------|--------|--------|--------|--------|--------|-------|-------|-------|
| Marshall Islands                 | 21.27  | 17.94  | 24.45  | 23.78  | 21.47  | 26     | 0.10  | 0.13  | 0.10  |
| Mauritania                       | 18.66  | 25.17  | 12.1   | 14.45  | 20.55  | 8.43   | 0.46  | 0.47  | 0.36  |
| Mauritius                        | 30.08  | 30.35  | 29.81  | 28.26  | 29.53  | 26.97  | -0.25 | -0.27 | -0.24 |
| Mexico                           | 12.34  | 13.02  | 11.65  | 14.68  | 16.14  | 13.21  | 0.14  | 0.12  | 0.15  |
| Moldova                          | 85.57  | 96.93  | 73.10  | 81.93  | 88.38  | 74.96  | 0.01  | -0.01 | 0.05  |
| Mongolia                         | 9.79   | 11.91  | 7.61   | 13.03  | 12.43  | 13.65  | 0.59  | 0.46  | 0.93  |
| Montenegro                       | 27.27  | 34.11  | 20.37  | 42.88  | 45.17  | 40.54  | 0.30  | 0.25  | 0.48  |
| Morocco                          | 23.43  | 27.25  | 19.6   | 32.76  | 38.5   | 26.89  | 0.59  | 0.59  | 0.59  |
| Mozambique                       | 19.17  | 21.03  | 17.15  | 22.53  | 24.71  | 20.25  | 0.81  | 0.83  | 0.81  |
| Myanmar                          | 31.98  | 33.63  | 30.27  | 35.42  | 32.63  | 38.34  | 0.61  | 0.56  | 0.72  |
| Namibia                          | 22.14  | 26.48  | 17.62  | 17.11  | 18.16  | 15.99  | -0.11 | -0.17 | -0.01 |
| Nepal                            | 15.62  | 16.69  | 14.54  | 20.89  | 18.69  | 23.23  | 1.37  | 1.24  | 1.55  |
| Netherlands                      | 46.32  | 54.96  | 37.48  | 33.47  | 39.4   | 27.44  | -0.27 | -0.30 | -0.23 |
| New Zealand                      | 36.34  | 41.25  | 31.29  | 30.36  | 35.61  | 24.92  | -0.07 | -0.08 | -0.08 |
| Nicaragua                        | 10.71  | 10.84  | 10.57  | 13.24  | 13.88  | 12.58  | 0.45  | 0.51  | 0.40  |
| Niger                            | 11.89  | 14.88  | 8.8    | 13.61  | 15.94  | 11.31  | 1.47  | 1.36  | 1.73  |
| Nigeria                          | 14.85  | 19.32  | 10.47  | 9.07   | 10.43  | 7.76   | 0.13  | 0.06  | 0.34  |
| North Korea                      | 27.08  | 32.88  | 20.94  | 61.53  | 68.76  | 53.98  | 0.69  | 0.62  | 0.87  |
| Northern Mariana Islands         | 10.12  | 10.34  | 9.91   | 5.37   | 3.88   | 6.87   | -0.25 | -0.34 | -0.17 |
| Norway                           | 72.44  | 82.96  | 61.69  | 35.88  | 44.05  | 27.8   | -0.34 | -0.36 | -0.34 |
| Oman                             | 2.41   | 3.01   | 1.93   | 5.31   | 7.4    | 4.25   | 2.66  | 3.48  | 2.56  |
| Pakistan                         | 24.76  | 22.39  | 26.96  | 28.56  | 24.61  | 32.3   | 0.48  | 0.53  | 0.46  |
| Palestine                        | 6.68   | 7.69   | 5.69   | 12.53  | 12.57  | 12.5   | 1.49  | 1.49  | 1.67  |
| Panama                           | 25.7   | 24.86  | 26.52  | 24.38  | 23.48  | 25.28  | -0.19 | -0.20 | -0.19 |
| Papua New Guinea                 | 26.27  | 28.94  | 23.73  | 27.88  | 32.79  | 23.17  | 0.27  | 0.32  | 0.21  |
| Paraguay                         | 16.57  | 17.69  | 15.48  | 17.79  | 18.02  | 17.56  | -0.16 | -0.14 | -0.17 |
| Peru                             | 17.88  | 18.83  | 16.93  | 11.53  | 12.49  | 10.58  | -0.01 | -0.03 | 0.00  |
| Philippines                      | 10.8   | 10.67  | 10.94  | 17.34  | 17.27  | 17.4   | 0.70  | 0.70  | 0.70  |
| Poland                           | 79.26  | 101.50 | 55.87  | 76.88  | 92.5   | 60.07  | 0.00  | -0.07 | 0.12  |
| Portugal                         | 148.85 | 164.40 | 132.13 | 76.78  | 86.95  | 65.94  | -0.45 | -0.44 | -0.47 |
| Puerto Rico                      | 29.49  | 29.97  | 28.98  | 29     | 33.83  | 23.8   | -0.16 | -0.19 | -0.19 |
| Qatar                            | 6.15   | 9.02   | 4.73   | 2.91   | 4.26   | 2.4    | -0.15 | -0.07 | -0.11 |
| Romania                          | 111.18 | 123.29 | 98.72  | 153.85 | 167.61 | 139.21 | 0.12  | 0.10  | 0.14  |
| Russia                           | 180.24 | 229.73 | 124.05 | 191.91 | 226.72 | 151.03 | -0.12 | -0.13 | -0.07 |
| Rwanda                           | 23.36  | 29.51  | 16.98  | 14.4   | 16.65  | 11.96  | 0.39  | 0.29  | 0.57  |
| Saint Lucia                      | 58.28  | 67.32  | 48.97  | 51.93  | 62.68  | 40.77  | -0.16 | -0.16 | -0.19 |
| Saint Vincent and the Grenadines | 43.14  | 55.09  | 31.08  | 41.22  | 48.39  | 34.18  | -0.21 | -0.19 | -0.17 |
| Samoa                            | 22.69  | 19.36  | 25.76  | 24.06  | 25.8   | 22.42  | 0.00  | 0.01  | 0.02  |
| Sao Tome and Principe            | 28.86  | 37.16  | 20.41  | 26.81  | 35.33  | 18.23  | 0.49  | 0.47  | 0.48  |
| Saudi Arabia                     | 12.09  | 13.46  | 11.02  | 12.69  | 13.1   | 12.38  | 0.74  | 0.94  | 0.68  |
| Senegal                          | 15.79  | 19.42  | 12.12  | 19.38  | 25.25  | 13.3   | 1.12  | 1.19  | 0.93  |
| Serbia                           | 117.68 | 132.24 | 102.72 | 172.33 | 195.93 | 147.57 | 0.13  | 0.11  | 0.14  |
| Seychelles                       | 33.66  | 36.63  | 30.69  | 22.23  | 23.99  | 20.51  | -0.27 | -0.30 | -0.24 |
| Sierra Leone                     | 14.01  | 13.77  | 14.25  | 17.41  | 21.57  | 13.18  | 1.00  | 1.38  | 0.62  |
| Singapore                        | 32.54  | 37.02  | 28.17  | 32.59  | 39.76  | 25.16  | -0.13 | -0.15 | -0.16 |
| Slovakia                         | 76.03  | 85.88  | 65.73  | 66.77  | 76.81  | 56.17  | 0.02  | -0.05 | 0.07  |
| Slovenia                         | 95.50  | 109.61 | 80.53  | 62.88  | 75.58  | 49.95  | -0.34 | -0.35 | -0.34 |
| Solomon Islands                  | 32.03  | 29.02  | 34.87  | 31.23  | 30.42  | 32.02  | 0.13  | 0.18  | 0.10  |
| Somalia                          | 27.62  | 33.06  | 22.08  | 19.65  | 23.16  | 16.1   | 0.08  | 0.06  | 0.11  |
| South Africa                     | 30.82  | 42.2   | 19.17  | 33.07  | 42.85  | 22.96  | -0.08 | -0.10 | -0.01 |
| South Korea                      | 61.02  | 69.23  | 52.84  | 54.76  | 62     | 47.44  | -0.22 | -0.24 | -0.21 |
| South Sudan                      | 16.4   | 20.93  | 11.83  | 17.85  | 22.76  | 12.94  | 0.65  | 0.65  | 0.67  |
| Spain                            | 73.7   | 86.71  | 60.15  | 38.54  | 46.89  | 29.98  | -0.47 | -0.48 | -0.46 |
| Sri Lanka                        | 12.93  | 11.34  | 14.48  | 39.1   | 38.16  | 40.1   | 2.23  | 2.22  | 2.12  |
| Sudan                            | 30.38  | 35.04  | 25.76  | 30.26  | 33     | 27.55  | 0.76  | 0.73  | 0.84  |
| Suriname                         | 34.81  | 39.06  | 30.71  | 41.28  | 45.9   | 36.67  | 0.09  | 0.12  | 0.06  |
| Swaziland                        | 17.93  | 21.31  | 14.14  | 27.36  | 33.21  | 21.39  | -0.03 | -0.04 | -0.01 |
| Sweden                           | 73.46  | 84.68  | 61.97  | 52.69  | 63.59  | 41.77  | -0.16 | -0.17 | -0.15 |
| Switzerland                      | 57.01  | 65.72  | 47.89  | 30.74  | 36.34  | 25.01  | -0.37 | -0.38 | -0.35 |
| Syria                            | 26.28  | 26.9   | 25.68  | 23.08  | 23.64  | 22.54  | -0.33 | -0.11 | -0.44 |
| Taiwan                           | 32.64  | 29.85  | 35.23  | 32.06  | 29.34  | 34.78  | -0.26 | -0.26 | -0.26 |
| Tajikistan                       | 35.13  | 37.69  | 32.53  | 25.54  | 24.6   | 26.46  | 0.35  | 0.32  | 0.43  |
| Tanzania                         | 14.32  | 17.25  | 11.34  | 14.62  | 15.92  | 13.29  | 0.72  | 0.59  | 0.92  |
| Thailand                         | 12.23  | 13.93  | 10.5   | 25.34  | 24.86  | 25.83  | 0.33  | 0.22  | 0.51  |
| The Bahamas                      | 29.17  | 33.2   | 25.08  | 31.41  | 37.01  | 25.57  | -0.07 | -0.10 | -0.06 |
| The Gambia                       | 13.78  | 17.81  | 9.82   | 12.16  | 13.98  | 10.31  | 0.62  | 0.63  | 0.78  |
| Timor-Leste                      | 9.88   | 12.22  | 7.6    | 16.15  | 20.03  | 12.4   | 2.50  | 2.53  | 2.56  |
| Togo                             | 18.1   | 23.47  | 12.6   | 16.88  | 19.17  | 14.54  | 0.29  | 0.26  | 0.45  |
| Tonga                            | 21.5   | 25.21  | 17.88  | 26.82  | 31.4   | 22.27  | 0.13  | 0.15  | 0.12  |
| Trinidad and Tobago              | 46.51  | 48.97  | 44.02  | 39.6   | 41.04  | 38.13  | -0.30 | -0.27 | -0.32 |



|                                                      |        |        |        |        |        |        |       |       |       |
|------------------------------------------------------|--------|--------|--------|--------|--------|--------|-------|-------|-------|
| Tunisia                                              | 28.41  | 26     | 30.79  | 38.08  | 36.98  | 39.21  | 0.34  | 0.50  | 0.23  |
| Turkey                                               | 22.87  | 27.75  | 17.86  | 22.98  | 25.28  | 20.6   | 0.75  | 0.61  | 1.00  |
| Turkmenistan                                         | 7.49   | 9.27   | 5.65   | 7.85   | 9.06   | 6.6    | 0.48  | 0.50  | 0.55  |
| Uganda                                               | 17.83  | 22     | 13.61  | 13.52  | 14.45  | 12.59  | 0.48  | 0.34  | 0.73  |
| Ukraine                                              | 172.90 | 214.85 | 124.08 | 155.84 | 184.53 | 121.96 | -0.27 | -0.27 | -0.24 |
| United Arab Emirates                                 | 10.85  | 12.68  | 9.9    | 9.36   | 8.31   | 9.75   | 0.12  | 0.16  | 0.20  |
| United Kingdom                                       | 75.67  | 92.25  | 58.13  | 44.46  | 52.47  | 36.25  | -0.29 | -0.32 | -0.23 |
| United States                                        | 41.67  | 49.14  | 33.81  | 34.39  | 40.11  | 28.48  | -0.15 | -0.19 | -0.10 |
| Uruguay                                              | 88.28  | 97.75  | 78.21  | 79.11  | 100.71 | 55.97  | -0.19 | -0.18 | -0.27 |
| Uzbekistan                                           | 37.1   | 39.88  | 34.26  | 37.71  | 36.36  | 39.1   | 0.19  | 0.15  | 0.26  |
| Vanuatu                                              | 38.7   | 32.58  | 44.48  | 35.72  | 34.38  | 37.03  | 0.00  | 0.08  | -0.05 |
| Venezuela                                            | 18.8   | 19.87  | 17.75  | 16.92  | 18.47  | 15.36  | -0.27 | -0.20 | -0.33 |
| Vietnam                                              | 35.31  | 40.89  | 29.57  | 52.7   | 59.14  | 46.13  | 0.57  | 0.57  | 0.62  |
| Virgin Islands, U.S.                                 | 20.29  | 20.63  | 19.94  | 43.24  | 43.63  | 42.82  | 0.00  | -0.01 | 0.00  |
| Yemen                                                | 25.2   | 31.99  | 18.29  | 27.13  | 32.64  | 21.74  | 1.09  | 1.09  | 1.22  |
| Zambia                                               | 12.61  | 17.9   | 7.22   | 15.62  | 18.04  | 13.2   | 0.78  | 0.58  | 1.46  |
| Zimbabwe                                             | 9.39   | 12.75  | 6      | 11.33  | 13.58  | 9.01   | 0.00  | -0.10 | 0.22  |
| <b>Other cardiovascular and circulatory diseases</b> |        |        |        |        |        |        |       |       |       |
| Afghanistan                                          | 9.49   | 13.77  | 5.41   | 14.03  | 20.35  | 8.09   | 1.09  | 1.17  | 1.06  |
| Albania                                              | 10.89  | 9.27   | 12.44  | 19.68  | 16.48  | 22.93  | 0.31  | 0.31  | 0.32  |
| Algeria                                              | 7.33   | 8.56   | 6.13   | 7.69   | 9.37   | 6.04   | 0.15  | 0.20  | 0.09  |
| American Samoa                                       | 5.07   | 3.18   | 6.85   | 5.74   | 5.91   | 5.58   | 0.42  | 0.85  | 0.21  |
| Andorra                                              | 9.64   | 10.03  | 9.22   | 14.31  | 15.13  | 13.46  | 0.24  | 0.36  | 0.18  |
| Angola                                               | 13.7   | 14.95  | 12.42  | 10.92  | 12.86  | 8.96   | 0.59  | 0.63  | 0.54  |
| Antigua and Barbuda                                  | 7.01   | 7.6    | 6.38   | 14.68  | 14.43  | 14.95  | 1.33  | 1.20  | 1.51  |
| Argentina                                            | 9.82   | 9.68   | 9.96   | 18.74  | 21.98  | 15.35  | 0.87  | 0.99  | 0.67  |
| Armenia                                              | 1.09   | 1.16   | 1.02   | 3.34   | 3.62   | 3.01   | 1.31  | 1.37  | 1.21  |
| Australia                                            | 6.98   | 7.28   | 6.68   | 9.51   | 10.24  | 8.76   | 0.43  | 0.42  | 0.43  |
| Austria                                              | 22.32  | 28.33  | 15.78  | 20.4   | 26.64  | 13.85  | 0.03  | 0.07  | -0.01 |
| Azerbaijan                                           | 1.77   | 1.74   | 1.81   | 3.26   | 2.68   | 3.85   | 1.26  | 1.01  | 1.49  |
| Bahrain                                              | 3.3    | 3.72   | 2.98   | 1.9    | 2.5    | 1.53   | -0.01 | 0.11  | -0.09 |
| Bangladesh                                           | 0.42   | 0.48   | 0.37   | 0.72   | 0.69   | 0.74   | 1.89  | 1.80  | 2.11  |
| Barbados                                             | 7.17   | 8.18   | 6.08   | 23.22  | 27.32  | 18.76  | 1.66  | 1.66  | 1.62  |
| Belarus                                              | 2.17   | 2.57   | 1.71   | 2.89   | 3.17   | 2.55   | -0.03 | -0.03 | 0.00  |
| Belgium                                              | 16.12  | 19.74  | 12.34  | 27.76  | 33.58  | 21.71  | 0.81  | 0.77  | 0.86  |
| Belize                                               | 4.3    | 4.64   | 3.97   | 8.96   | 8.49   | 9.43   | 1.29  | 1.31  | 1.36  |
| Benin                                                | 11.36  | 12.88  | 9.74   | 7.87   | 7.52   | 8.21   | 0.16  | 0.00  | 0.37  |
| Bermuda                                              | 7.17   | 7.22   | 7.12   | 13.55  | 12.5   | 14.63  | 1.23  | 0.93  | 1.51  |
| Bhutan                                               | 0.47   | 0.53   | 0.41   | 0.91   | 0.85   | 0.95   | 2.48  | 2.40  | 2.72  |
| Bolivia                                              | 12.68  | 13.36  | 12.01  | 11.01  | 11.81  | 10.22  | 0.33  | 0.31  | 0.36  |
| Bosnia and Herzegovina                               | 19.14  | 19.09  | 19.19  | 14.1   | 11.67  | 16.55  | -0.43 | -0.55 | -0.31 |
| Botswana                                             | 3.26   | 3.93   | 2.58   | 4.29   | 4.71   | 3.87   | -0.13 | -0.15 | -0.05 |
| Brazil                                               | 5.96   | 5.73   | 6.19   | 8.96   | 9.46   | 8.45   | 0.39  | 0.48  | 0.29  |
| Brunei                                               | 2.85   | 3      | 2.71   | 3.56   | 3.55   | 3.56   | 0.13  | 0.08  | 0.19  |
| Bulgaria                                             | 26.2   | 21.91  | 30.6   | 39.13  | 34.24  | 44.26  | 0.22  | 0.21  | 0.23  |
| Burkina Faso                                         | 14.56  | 17.7   | 11.27  | 10.24  | 12.1   | 8.36   | 0.29  | 0.21  | 0.39  |
| Burundi                                              | 35.63  | 38.12  | 33.05  | 13.99  | 14.36  | 13.63  | -0.09 | -0.09 | -0.05 |
| Cambodia                                             | 6.9    | 7.28   | 6.5    | 5.1    | 4.95   | 5.27   | 0.43  | 0.40  | 0.51  |
| Cameroon                                             | 14.54  | 17.14  | 11.91  | 9.47   | 9.95   | 8.99   | -0.20 | -0.27 | -0.11 |
| Canada                                               | 6.97   | 7.05   | 6.9    | 9.79   | 10.55  | 9.02   | 0.28  | 0.27  | 0.27  |
| Cape Verde                                           | 18.78  | 16.73  | 21.04  | 10.95  | 12.42  | 9.43   | -0.25 | -0.04 | -0.42 |
| Central African Republic                             | 18.01  | 19.73  | 16.23  | 18.96  | 20.4   | 17.48  | 0.19  | 0.13  | 0.22  |
| Chad                                                 | 10.72  | 13.72  | 7.68   | 8.11   | 9.25   | 6.98   | 0.07  | -0.05 | 0.26  |
| Chile                                                | 2.42   | 2.42   | 2.42   | 6.6    | 7.77   | 5.39   | 1.50  | 1.65  | 1.25  |
| China                                                | 12.48  | 13.32  | 11.68  | 5.02   | 4.35   | 5.65   | -0.55 | -0.57 | -0.51 |
| Colombia                                             | 5.26   | 5.19   | 5.32   | 6.07   | 6.56   | 5.57   | 0.26  | 0.27  | 0.21  |
| Comoros                                              | 24.53  | 25     | 24.06  | 12.99  | 13.27  | 12.71  | 0.11  | 0.13  | 0.13  |
| Congo                                                | 16.3   | 18.24  | 14.34  | 13.24  | 17.64  | 8.85   | 0.19  | 0.20  | 0.09  |
| Costa Rica                                           | 1.75   | 1.88   | 1.63   | 5.79   | 6.06   | 5.53   | 1.66  | 1.54  | 1.77  |
| Cote d'Ivoire                                        | 12.19  | 12.92  | 11.52  | 8.57   | 8.36   | 8.77   | -0.08 | -0.13 | -0.04 |
| Croatia                                              | 34.48  | 36.46  | 32.37  | 14.27  | 15.65  | 12.8   | -0.64 | -0.65 | -0.63 |
| Cuba                                                 | 2.06   | 2.42   | 1.7    | 11.08  | 10.69  | 11.45  | 2.97  | 2.12  | 4.15  |
| Cyprus                                               | 17.34  | 17.41  | 17.27  | 11.31  | 11.37  | 11.24  | -0.12 | -0.04 | -0.14 |
| Czech Republic                                       | 21.65  | 23.47  | 19.72  | 24.76  | 27.61  | 21.82  | 0.37  | 0.37  | 0.37  |
| Democratic Republic of the Congo                     | 8.7    | 10.71  | 6.65   | 9.39   | 10.74  | 8.02   | 0.66  | 0.59  | 0.85  |
| Denmark                                              | 27.1   | 29.1   | 25.05  | 18.18  | 20.34  | 15.99  | -0.16 | -0.13 | -0.19 |
| Djibouti                                             | 18.68  | 16.29  | 21.04  | 22.45  | 18.68  | 26.19  | 0.34  | 0.34  | 0.36  |
| Dominica                                             | 5.48   | 6.79   | 4.15   | 18.32  | 20.4   | 16.21  | 1.53  | 1.57  | 1.66  |
| Dominican Republic                                   | 3.47   | 3.54   | 3.4    | 6.87   | 7.25   | 6.48   | 0.71  | 0.76  | 0.65  |
| Ecuador                                              | 2.9    | 2.87   | 2.93   | 4.89   | 4.81   | 4.97   | 0.68  | 0.69  | 0.68  |

|                                |       |       |       |       |       |       |       |       |       |
|--------------------------------|-------|-------|-------|-------|-------|-------|-------|-------|-------|
| Egypt                          | 18.75 | 18.9  | 18.6  | 16.19 | 15.16 | 17.18 | 0.21  | 0.22  | 0.22  |
| El Salvador                    | 3.59  | 3.54  | 3.64  | 5.27  | 5.97  | 4.48  | 0.56  | 0.72  | 0.33  |
| Equatorial Guinea              | 20.12 | 21.9  | 18.42 | 11.54 | 12.31 | 10.8  | 0.18  | 0.17  | 0.20  |
| Eritrea                        | 19.25 | 21.67 | 16.8  | 17.64 | 21.36 | 13.94 | 0.43  | 0.44  | 0.36  |
| Estonia                        | 2.87  | 3.23  | 2.46  | 12.8  | 14.86 | 10.37 | 3.77  | 3.64  | 3.82  |
| Ethiopia                       | 27.69 | 28.33 | 27.05 | 13.82 | 14.04 | 13.61 | 0.46  | 0.42  | 0.50  |
| Federated States of Micronesia | 8.5   | 7.81  | 9.17  | 10.35 | 11.1  | 9.63  | 0.37  | 0.57  | 0.22  |
| Fiji                           | 9.58  | 8.78  | 10.35 | 21.87 | 22.39 | 21.36 | 0.59  | 0.65  | 0.53  |
| Finland                        | 7.58  | 9.38  | 5.67  | 18.98 | 22.9  | 14.94 | 1.58  | 1.47  | 1.77  |
| France                         | 32.15 | 35    | 29.14 | 32.97 | 36.21 | 29.52 | -0.01 | -0.02 | 0.00  |
| Gabon                          | 19.95 | 19.88 | 20.01 | 14.6  | 16.67 | 12.58 | 0.15  | 0.26  | 0.04  |
| Georgia                        | 1.47  | 1.73  | 1.19  | 12.78 | 9.55  | 16.31 | 5.72  | 3.65  | 8.86  |
| Germany                        | 11.27 | 13.74 | 8.61  | 31.84 | 38.2  | 25.27 | 1.90  | 1.95  | 1.91  |
| Ghana                          | 4.16  | 2.56  | 5.71  | 3.77  | 2.65  | 4.91  | 0.34  | 0.65  | 0.18  |
| Greece                         | 10.46 | 12.39 | 8.49  | 9.21  | 10.67 | 7.67  | -0.28 | -0.31 | -0.23 |
| Greenland                      | 9.29  | 7.6   | 10.76 | 11.42 | 8.88  | 13.61 | 0.47  | 0.54  | 0.43  |
| Grenada                        | 6.95  | 7.43  | 6.45  | 15.7  | 16.51 | 14.89 | 1.24  | 1.19  | 1.31  |
| Guam                           | 3.74  | 3.73  | 3.76  | 10.99 | 11.86 | 10.15 | 0.54  | 0.58  | 0.45  |
| Guatemala                      | 2.3   | 2.26  | 2.34  | 2.87  | 3.05  | 2.69  | 0.85  | 0.96  | 0.72  |
| Guinea                         | 11.85 | 15.85 | 7.75  | 7.9   | 8.89  | 6.91  | 0.11  | -0.02 | 0.42  |
| Guinea-Bissau                  | 16.4  | 20.21 | 12.5  | 11.17 | 12.4  | 9.93  | -0.03 | -0.12 | 0.14  |
| Guyana                         | 4.7   | 4.63  | 4.77  | 10.39 | 9.92  | 10.86 | 1.16  | 1.19  | 1.17  |
| Haiti                          | 8.62  | 10.88 | 6.3   | 9.43  | 11.47 | 7.34  | 0.79  | 0.69  | 0.97  |
| Honduras                       | 1.76  | 1.91  | 1.6   | 2.52  | 2.79  | 2.25  | 0.50  | 0.42  | 0.58  |
| Hungary                        | 28.87 | 30.56 | 27.05 | 20.94 | 22.91 | 18.76 | -0.16 | -0.20 | -0.12 |
| Iceland                        | 8.57  | 9.93  | 7.22  | 9.91  | 10.33 | 9.48  | 0.34  | 0.32  | 0.41  |
| India                          | 0.64  | 0.71  | 0.58  | 1.38  | 1.31  | 1.46  | 1.96  | 1.81  | 2.16  |
| Indonesia                      | 4.11  | 4.06  | 4.15  | 4.66  | 4.6   | 4.73  | 0.40  | 0.47  | 0.36  |
| Iran                           | 20.00 | 16.53 | 23.35 | 15.46 | 12.02 | 18.85 | 0.06  | 0.15  | 0.02  |
| Iraq                           | 15.99 | 18.1  | 13.92 | 12.89 | 14.02 | 11.79 | -0.01 | 0.06  | -0.04 |
| Ireland                        | 9.24  | 10.28 | 8.19  | 8.91  | 9.5   | 8.3   | 0.22  | 0.24  | 0.23  |
| Israel                         | 3.09  | 3.73  | 2.44  | 11.42 | 14.29 | 8.5   | 2.99  | 2.96  | 2.93  |
| Italy                          | 9.37  | 10.43 | 8.23  | 16.94 | 20.14 | 13.54 | 0.59  | 0.59  | 0.56  |
| Jamaica                        | 4.29  | 4.88  | 3.68  | 10.79 | 12.54 | 9.02  | 0.96  | 1.12  | 0.81  |
| Japan                          | 4.81  | 5.02  | 4.58  | 12.5  | 15.33 | 9.52  | 0.60  | 0.80  | 0.32  |
| Jordan                         | 4.42  | 5.49  | 3.45  | 2.83  | 2.98  | 2.7   | 0.10  | 0.07  | 0.21  |
| Kazakhstan                     | 2.46  | 2.49  | 2.43  | 9.3   | 6.03  | 12.8  | 2.75  | 1.64  | 3.84  |
| Kenya                          | 10.21 | 11.03 | 9.38  | 10.21 | 9.94  | 10.48 | 0.29  | 0.23  | 0.37  |
| Kiribati                       | 7.9   | 6.71  | 9.12  | 13.52 | 14.58 | 12.44 | 1.16  | 2.03  | 0.60  |
| Kuwait                         | 1.1   | 1.28  | 0.96  | 1.97  | 2.05  | 1.9   | 1.41  | 1.17  | 1.75  |
| Kyrgyzstan                     | 1.73  | 2.1   | 1.35  | 2.91  | 2.54  | 3.29  | 1.19  | 0.78  | 1.89  |
| Laos                           | 9.19  | 9.86  | 8.51  | 4.93  | 4.67  | 5.2   | 0.32  | 0.26  | 0.43  |
| Latvia                         | 2.74  | 3.39  | 1.99  | 8.17  | 7.98  | 8.4   | 2.03  | 1.33  | 3.43  |
| Lebanon                        | 7.51  | 8.2   | 6.8   | 7.13  | 8.95  | 5.32  | 0.41  | 0.43  | 0.31  |
| Lesotho                        | 4.22  | 4.75  | 3.66  | 6.85  | 7.99  | 5.69  | -0.08 | -0.10 | -0.06 |
| Liberia                        | 11.82 | 14.16 | 9.47  | 6.26  | 7.02  | 5.52  | 0.23  | 0.06  | 0.46  |
| Libya                          | 6.97  | 7.59  | 6.42  | 7.09  | 7.86  | 6.32  | -0.14 | -0.02 | -0.23 |
| Lithuania                      | 2.9   | 3.27  | 2.5   | 12.6  | 11.52 | 13.85 | 2.77  | 2.04  | 3.85  |
| Luxembourg                     | 32.58 | 37.67 | 27.28 | 24.49 | 29.69 | 19.28 | 0.14  | 0.13  | 0.13  |
| Macedonia                      | 14.51 | 12.74 | 16.26 | 9.15  | 7.65  | 10.66 | -0.46 | -0.51 | -0.42 |
| Madagascar                     | 29.55 | 29.5  | 29.60 | 25.39 | 25.04 | 25.75 | 0.43  | 0.43  | 0.42  |
| Malawi                         | 13.89 | 16.2  | 11.5  | 11.04 | 10.99 | 11.09 | 0.53  | 0.36  | 0.80  |
| Malaysia                       | 8.33  | 8.21  | 8.44  | 7.31  | 6.56  | 8.07  | -0.19 | -0.11 | -0.21 |
| Maldives                       | 8.31  | 8.11  | 8.5   | 3.71  | 2.74  | 4.67  | 0.05  | 0.00  | 0.10  |
| Mali                           | 14.96 | 20.27 | 9.52  | 6.77  | 8.71  | 4.86  | -0.17 | -0.22 | -0.06 |
| Malta                          | 9.93  | 10.22 | 9.63  | 11.78 | 13    | 10.55 | 0.03  | 0.05  | 0.00  |
| Marshall Islands               | 7.76  | 6.79  | 8.68  | 13.24 | 15.43 | 11.12 | 0.69  | 1.14  | 0.34  |
| Mauritania                     | 11.61 | 14.83 | 8.38  | 5.37  | 6.62  | 4.13  | -0.13 | -0.19 | -0.04 |
| Mauritius                      | 3.8   | 2.88  | 4.73  | 5.22  | 4.86  | 5.6   | 0.09  | 0.26  | -0.01 |
| Mexico                         | 3.36  | 3.32  | 3.41  | 4.12  | 4.25  | 3.99  | 0.18  | 0.16  | 0.18  |
| Moldova                        | 1.91  | 1.91  | 1.91  | 3.55  | 3.13  | 4     | 0.96  | 0.78  | 1.15  |
| Mongolia                       | 8.02  | 5.99  | 10.09 | 3.59  | 2.84  | 4.35  | -0.47 | -0.34 | -0.54 |
| Montenegro                     | 7.66  | 8.38  | 6.92  | 9.17  | 9.38  | 8.95  | -0.01 | 0.06  | -0.03 |
| Morocco                        | 14.75 | 15.28 | 14.23 | 10.7  | 11.33 | 10.06 | -0.17 | -0.16 | -0.18 |
| Mozambique                     | 15.7  | 15.8  | 15.6  | 18.5  | 18.01 | 19.02 | 0.80  | 0.73  | 0.87  |
| Myanmar                        | 8.73  | 10.79 | 6.59  | 8.04  | 9.47  | 6.53  | 0.34  | 0.41  | 0.34  |
| Namibia                        | 4.16  | 4.68  | 3.62  | 2.96  | 2.9   | 3.02  | -0.18 | -0.24 | -0.09 |
| Nepal                          | 0.44  | 0.47  | 0.4   | 0.71  | 0.65  | 0.77  | 1.88  | 1.76  | 2.09  |
| Netherlands                    | 16.51 | 18.84 | 14.14 | 21.34 | 23.72 | 18.92 | 0.31  | 0.23  | 0.41  |
| New Zealand                    | 9.22  | 9.42  | 9.03  | 12.19 | 12.8  | 11.55 | 0.47  | 0.45  | 0.49  |

|                                  |       |       |       |       |       |       |       |       |       |
|----------------------------------|-------|-------|-------|-------|-------|-------|-------|-------|-------|
| Nicaragua                        | 1.62  | 1.71  | 1.53  | 2.74  | 3.08  | 2.38  | 0.98  | 1.11  | 0.82  |
| Niger                            | 9.05  | 10.61 | 7.45  | 5.05  | 5.54  | 4.56  | 0.20  | 0.14  | 0.30  |
| Nigeria                          | 10.17 | 12.71 | 7.68  | 4.59  | 4.7   | 4.47  | -0.16 | -0.27 | 0.05  |
| North Korea                      | 7.81  | 9.74  | 5.77  | 8.84  | 10.84 | 6.75  | -0.15 | -0.13 | -0.15 |
| Northern Mariana Islands         | 3.38  | 3.75  | 3.04  | 3.28  | 3.05  | 3.52  | 0.37  | 0.44  | 0.38  |
| Norway                           | 19.86 | 22.7  | 16.96 | 17.74 | 22.53 | 13    | 0.19  | 0.21  | 0.13  |
| Oman                             | 41.70 | 45.07 | 39.01 | 18.21 | 18.05 | 18.29 | -0.30 | -0.33 | -0.26 |
| Pakistan                         | 0.67  | 0.53  | 0.81  | 1.27  | 1.06  | 1.47  | 1.43  | 1.80  | 1.23  |
| Palestine                        | 4.6   | 4.93  | 4.28  | 5.2   | 5.25  | 5.15  | 0.49  | 0.61  | 0.46  |
| Panama                           | 2.01  | 2     | 2.02  | 5.26  | 5.16  | 5.35  | 1.22  | 1.19  | 1.26  |
| Papua New Guinea                 | 7.81  | 8.66  | 6.99  | 8.75  | 10.3  | 7.25  | 0.34  | 0.38  | 0.29  |
| Paraguay                         | 2.35  | 2.51  | 2.2   | 5.51  | 5.75  | 5.28  | 0.82  | 0.93  | 0.76  |
| Peru                             | 1.99  | 1.85  | 2.12  | 4.03  | 4.25  | 3.81  | 2.10  | 2.33  | 1.88  |
| Philippines                      | 0.9   | 0.89  | 0.91  | 2.39  | 2.23  | 2.54  | 1.81  | 1.64  | 1.98  |
| Poland                           | 18.41 | 15.41 | 21.56 | 12.65 | 11.97 | 13.39 | -0.29 | -0.21 | -0.35 |
| Portugal                         | 11.64 | 12.27 | 10.97 | 16.84 | 19.34 | 14.17 | 0.54  | 0.68  | 0.38  |
| Puerto Rico                      | 6.07  | 6.7   | 5.41  | 11.89 | 12.13 | 11.63 | 0.67  | 0.31  | 1.12  |
| Qatar                            | 2.64  | 3.46  | 2.24  | 1.37  | 1.8   | 1.2   | -0.07 | 0.03  | -0.06 |
| Romania                          | 18.34 | 13.81 | 22.99 | 15.57 | 9.74  | 21.79 | -0.31 | -0.43 | -0.23 |
| Russia                           | 2.74  | 2.89  | 2.56  | 9.29  | 8.91  | 9.73  | 1.79  | 1.71  | 1.92  |
| Rwanda                           | 21.88 | 25.78 | 17.85 | 12.24 | 13    | 11.43 | 0.27  | 0.16  | 0.42  |
| Saint Lucia                      | 7.17  | 8.05  | 6.27  | 18.93 | 21.05 | 16.73 | 1.47  | 1.38  | 1.58  |
| Saint Vincent and the Grenadines | 7.28  | 9.04  | 5.51  | 19.22 | 19.2  | 19.24 | 1.19  | 0.96  | 1.64  |
| Samoa                            | 6.28  | 5.23  | 7.25  | 10.51 | 13.28 | 7.9   | 0.60  | 0.94  | 0.29  |
| Sao Tome and Principe            | 15.47 | 21.78 | 9.05  | 13.29 | 19.06 | 7.47  | 0.38  | 0.36  | 0.36  |
| Saudi Arabia                     | 3.01  | 3.54  | 2.6   | 3.7   | 4.2   | 3.32  | 1.04  | 1.37  | 0.90  |
| Senegal                          | 10.09 | 12.21 | 7.95  | 7.16  | 8.39  | 5.89  | 0.22  | 0.15  | 0.29  |
| Serbia                           | 11.09 | 10.58 | 11.61 | 19.91 | 18.84 | 21.03 | 0.38  | 0.33  | 0.44  |
| Seychelles                       | 14.26 | 12.64 | 15.89 | 11.37 | 10.81 | 11.92 | -0.12 | -0.07 | -0.14 |
| Sierra Leone                     | 10.01 | 9.84  | 10.2  | 7.46  | 8.31  | 6.59  | 0.19  | 0.25  | 0.12  |
| Singapore                        | 1.78  | 2     | 1.57  | 3.14  | 3.5   | 2.76  | 0.53  | 0.39  | 0.66  |
| Slovakia                         | 26.15 | 24.69 | 27.68 | 16.27 | 17.68 | 14.78 | -0.28 | -0.24 | -0.33 |
| Slovenia                         | 13.95 | 15.24 | 12.58 | 19.49 | 24.05 | 14.84 | 0.40  | 0.48  | 0.26  |
| Solomon Islands                  | 8.48  | 7.84  | 9.08  | 10.93 | 11.41 | 10.45 | 0.49  | 0.63  | 0.38  |
| Somalia                          | 28.09 | 31.87 | 24.23 | 19.72 | 22.31 | 17.1  | 0.04  | 0.04  | 0.06  |
| South Africa                     | 5.13  | 6.4   | 3.83  | 6.55  | 7.95  | 5.11  | 0.09  | 0.10  | 0.10  |
| South Korea                      | 1.84  | 2.04  | 1.64  | 3.63  | 4.31  | 2.95  | 0.72  | 0.80  | 0.59  |
| South Sudan                      | 22.26 | 25.21 | 19.29 | 19.38 | 21.61 | 17.15 | 0.30  | 0.28  | 0.33  |
| Spain                            | 14.9  | 16.33 | 13.4  | 18.9  | 22.74 | 14.96 | 0.29  | 0.34  | 0.20  |
| Sri Lanka                        | 18.19 | 12.68 | 23.59 | 4.97  | 3.72  | 6.32  | -0.71 | -0.72 | -0.70 |
| Sudan                            | 9.18  | 10.69 | 7.68  | 8.41  | 9.55  | 7.28  | 0.62  | 0.63  | 0.64  |
| Suriname                         | 3.92  | 4.3   | 3.55  | 9.27  | 9.5   | 9.04  | 1.18  | 1.11  | 1.27  |
| Swaziland                        | 4.12  | 4.68  | 3.49  | 5.99  | 6.76  | 5.21  | -0.08 | -0.12 | -0.03 |
| Sweden                           | 22.93 | 25.77 | 20.02 | 20.3  | 23.39 | 17.21 | 0.04  | 0.00  | 0.08  |
| Switzerland                      | 33.97 | 37.4  | 30.37 | 17    | 20.2  | 13.73 | -0.41 | -0.40 | -0.44 |
| Syria                            | 2.94  | 2.92  | 2.97  | 2.96  | 3     | 2.92  | -0.23 | 0.05  | -0.37 |
| Taiwan                           | 6.39  | 6.27  | 6.5   | 6.04  | 6.04  | 6.03  | -0.28 | -0.26 | -0.30 |
| Tajikistan                       | 0.92  | 1.04  | 0.81  | 0.94  | 0.86  | 1.02  | 0.88  | 0.65  | 1.20  |
| Tanzania                         | 14.61 | 15.8  | 13.39 | 13.07 | 12.68 | 13.47 | 0.51  | 0.38  | 0.64  |
| Thailand                         | 6.8   | 5.34  | 8.28  | 12.98 | 12.1  | 13.89 | 0.22  | 0.54  | 0.02  |
| The Bahamas                      | 5.46  | 5.91  | 4.99  | 14.85 | 17.01 | 12.61 | 1.36  | 1.34  | 1.32  |
| The Gambia                       | 8.28  | 10.34 | 6.26  | 4.78  | 4.9   | 4.65  | 0.05  | -0.02 | 0.25  |
| Timor-Leste                      | 4.53  | 5.06  | 4.02  | 3.56  | 4.23  | 2.92  | 0.69  | 0.77  | 0.60  |
| Togo                             | 11.09 | 13.5  | 8.61  | 7.17  | 6.82  | 7.52  | -0.10 | -0.22 | 0.09  |
| Tonga                            | 1.06  | 1.15  | 0.99  | 1.91  | 2.32  | 1.51  | 0.65  | 0.92  | 0.40  |
| Trinidad and Tobago              | 2.2   | 2.61  | 1.79  | 10.06 | 10.89 | 9.2   | 2.77  | 2.64  | 3.05  |
| Tunisia                          | 8.75  | 8.98  | 8.53  | 10.05 | 9.77  | 10.33 | 0.15  | 0.15  | 0.17  |
| Turkey                           | 9.64  | 10.4  | 8.86  | 6.34  | 6.88  | 5.79  | 0.15  | 0.19  | 0.13  |
| Turkmenistan                     | 1.28  | 1.37  | 1.18  | 1.4   | 1.36  | 1.45  | 0.54  | 0.51  | 0.61  |
| Uganda                           | 18.26 | 20.84 | 15.66 | 15.16 | 14.61 | 15.71 | 0.61  | 0.42  | 0.86  |
| Ukraine                          | 2.14  | 2.39  | 1.84  | 3.15  | 3.28  | 3     | 0.20  | 0.16  | 0.26  |
| United Arab Emirates             | 0.84  | 0.81  | 0.85  | 1     | 0.69  | 1.11  | 0.60  | 0.61  | 0.66  |
| United Kingdom                   | 16.09 | 18.63 | 13.41 | 20.02 | 22.79 | 17.18 | 0.51  | 0.46  | 0.57  |
| United States                    | 11.07 | 11.63 | 10.5  | 11.96 | 13.09 | 10.79 | 0.11  | 0.12  | 0.10  |
| Uruguay                          | 7.8   | 7.86  | 7.73  | 24.83 | 30.74 | 18.51 | 1.89  | 2.12  | 1.46  |
| Uzbekistan                       | 0.67  | 0.77  | 0.57  | 1.22  | 1.17  | 1.26  | 1.11  | 0.89  | 1.43  |
| Vanuatu                          | 7.85  | 6.26  | 9.34  | 9.05  | 8.35  | 9.74  | 0.26  | 0.37  | 0.20  |
| Venezuela                        | 1.79  | 1.85  | 1.73  | 3.92  | 4.21  | 3.62  | 0.78  | 0.95  | 0.63  |
| Vietnam                          | 4.96  | 5.26  | 4.65  | 6.03  | 6.33  | 5.72  | 0.28  | 0.33  | 0.28  |
| Virgin Islands, U.S.             | 6.15  | 5.97  | 6.34  | 25.77 | 25.13 | 26.47 | 0.96  | 0.98  | 0.94  |

|                                  |       |       |       |       |       |       |       |       |       |
|----------------------------------|-------|-------|-------|-------|-------|-------|-------|-------|-------|
| Yemen                            | 10.13 | 12.64 | 7.58  | 8.82  | 10.96 | 6.73  | 0.67  | 0.72  | 0.68  |
| Zambia                           | 15.58 | 19.47 | 11.61 | 17.99 | 16.43 | 19.56 | 0.65  | 0.31  | 1.24  |
| Zimbabwe                         | 4.47  | 5.32  | 3.62  | 5.58  | 5.51  | 5.66  | 0.03  | -0.12 | 0.26  |
| <b>Peripheral artery disease</b> |       |       |       |       |       |       |       |       |       |
| Afghanistan                      | 0.01  | 0.01  | 0.01  | 0.02  | 0.01  | 0.02  | 1.59  | 1.94  | 1.48  |
| Albania                          | 0.02  | 0.02  | 0.03  | 0.1   | 0.08  | 0.12  | 2.33  | 2.55  | 2.24  |
| Algeria                          | 0.02  | 0.01  | 0.02  | 0.05  | 0.04  | 0.06  | 2.38  | 2.50  | 2.40  |
| American Samoa                   | 0.06  | 0.02  | 0.1   | 0.36  | 0.05  | 0.67  | 6.67  | 2.23  | 9.03  |
| Andorra                          | 2.68  | 2.13  | 3.25  | 5.08  | 4.52  | 5.66  | 0.64  | 1.01  | 0.54  |
| Angola                           | 0.05  | 0.06  | 0.04  | 0.09  | 0.11  | 0.08  | 2.98  | 2.91  | 3.46  |
| Antigua and Barbuda              | 0.83  | 0.83  | 0.83  | 1.47  | 1.41  | 1.53  | 0.99  | 1.03  | 0.99  |
| Argentina                        | 0.27  | 0.18  | 0.36  | 0.43  | 0.44  | 0.43  | 0.60  | 1.18  | 0.31  |
| Armenia                          | 0.03  | 0.03  | 0.02  | 0.14  | 0.16  | 0.12  | 2.77  | 2.67  | 2.95  |
| Australia                        | 2.41  | 2.47  | 2.35  | 3.95  | 4.12  | 3.78  | 0.73  | 0.70  | 0.76  |
| Austria                          | 2.15  | 2.04  | 2.28  | 6.68  | 7.24  | 6.09  | 2.53  | 3.10  | 2.02  |
| Azerbaijan                       | 0.02  | 0.02  | 0.02  | 0.06  | 0.06  | 0.06  | 2.95  | 2.63  | 3.76  |
| Bahrain                          | 0.17  | 0.06  | 0.25  | 0.44  | 0.35  | 0.5   | 3.69  | 9.49  | 2.73  |
| Bangladesh                       | 0.02  | 0.01  | 0.02  | 0.05  | 0.05  | 0.06  | 3.98  | 5.26  | 3.33  |
| Barbados                         | 4.04  | 5.63  | 2.34  | 7.71  | 10.84 | 4.32  | 0.62  | 0.64  | 0.60  |
| Belarus                          | 0.14  | 0.14  | 0.13  | 1.34  | 1.11  | 1.61  | 6.43  | 5.71  | 7.56  |
| Belgium                          | 0.38  | 0.38  | 0.39  | 2.1   | 2.08  | 2.13  | 4.85  | 5.05  | 4.79  |
| Belize                           | 0.17  | 0.12  | 0.22  | 0.22  | 0.19  | 0.26  | 0.50  | 1.12  | 0.22  |
| Benin                            | 0.01  | 0.02  | 0.01  | 0.02  | 0.03  | 0.01  | 1.45  | 2.14  | 0.52  |
| Bermuda                          | 1.51  | 1.47  | 1.56  | 3.07  | 3.72  | 2.41  | 1.42  | 1.93  | 0.92  |
| Bhutan                           | 0.03  | 0.03  | 0.03  | 0.13  | 0.12  | 0.13  | 7.14  | 9.48  | 5.86  |
| Bolivia                          | 0.02  | 0.02  | 0.02  | 0.07  | 0.08  | 0.07  | 4.01  | 4.97  | 3.38  |
| Bosnia and Herzegovina           | 0.07  | 0.05  | 0.1   | 0.24  | 0.19  | 0.29  | 1.85  | 2.55  | 1.77  |
| Botswana                         | 0.17  | 0.14  | 0.21  | 0.55  | 0.45  | 0.66  | 1.16  | 1.38  | 1.01  |
| Brazil                           | 0.32  | 0.28  | 0.37  | 1.25  | 1.2   | 1.3   | 2.56  | 2.86  | 2.32  |
| Brunei                           | 0.07  | 0.02  | 0.11  | 0.14  | 0.04  | 0.23  | 0.94  | 0.95  | 1.00  |
| Bulgaria                         | 0.06  | 0.04  | 0.07  | 0.41  | 0.34  | 0.48  | 4.95  | 5.21  | 4.95  |
| Burkina Faso                     | 0.02  | 0.02  | 0.01  | 0.03  | 0.05  | 0.02  | 2.80  | 4.18  | 1.02  |
| Burundi                          | 0.09  | 0.08  | 0.1   | 0.04  | 0.05  | 0.04  | 0.14  | 0.44  | -0.02 |
| Cambodia                         | 0.01  | 0.01  | 0.01  | 0.03  | 0.03  | 0.04  | 5.03  | 5.47  | 5.09  |
| Cameroon                         | 0.03  | 0.03  | 0.03  | 0.04  | 0.06  | 0.03  | 0.96  | 1.69  | 0.26  |
| Canada                           | 1.8   | 1.61  | 2     | 2.87  | 3.12  | 2.62  | 0.45  | 0.67  | 0.28  |
| Cape Verde                       | 0.07  | 0.11  | 0.02  | 0.2   | 0.34  | 0.05  | 3.32  | 3.49  | 3.49  |
| Central African Republic         | 0.1   | 0.12  | 0.08  | 0.11  | 0.14  | 0.09  | 0.36  | 0.38  | 0.34  |
| Chad                             | 0.01  | 0.02  | 0.01  | 0.02  | 0.03  | 0.01  | 1.34  | 1.93  | 0.43  |
| Chile                            | 0.37  | 0.3   | 0.43  | 2.21  | 2.16  | 2.25  | 4.53  | 5.02  | 4.28  |
| China                            | 0.03  | 0.03  | 0.04  | 0.13  | 0.11  | 0.15  | 3.55  | 4.12  | 3.32  |
| Colombia                         | 0.11  | 0.1   | 0.11  | 0.24  | 0.26  | 0.21  | 1.49  | 1.59  | 1.32  |
| Comoros                          | 0.09  | 0.11  | 0.07  | 0.07  | 0.09  | 0.05  | 0.68  | 0.86  | 0.52  |
| Congo                            | 0.13  | 0.15  | 0.11  | 0.16  | 0.22  | 0.11  | 0.82  | 0.86  | 0.61  |
| Costa Rica                       | 0.14  | 0.12  | 0.17  | 0.45  | 0.41  | 0.48  | 1.53  | 1.86  | 1.36  |
| Cote d'Ivoire                    | 0.02  | 0.02  | 0.02  | 0.03  | 0.04  | 0.02  | 0.81  | 1.50  | 0.17  |
| Croatia                          | 0.09  | 0.08  | 0.1   | 5.49  | 5.74  | 5.22  | 56.06 | 65.44 | 49.32 |
| Cuba                             | 1.16  | 1.18  | 1.14  | 5     | 4.96  | 5.03  | 2.31  | 2.29  | 2.41  |
| Cyprus                           | 1.05  | 1.08  | 1.02  | 0.94  | 0.96  | 0.91  | 0.23  | 0.37  | 0.20  |
| Czech Republic                   | 0.22  | 0.18  | 0.26  | 2.33  | 2.29  | 2.37  | 12.04 | 14.40 | 10.55 |
| Democratic Republic of the Congo | 0.06  | 0.07  | 0.04  | 0.05  | 0.07  | 0.04  | 0.56  | 0.64  | 0.58  |
| Denmark                          | 4.31  | 4.74  | 3.87  | 3.66  | 4.38  | 2.92  | 0.07  | 0.17  | -0.03 |
| Djibouti                         | 0.06  | 0.08  | 0.05  | 0.15  | 0.16  | 0.14  | 1.79  | 1.76  | 2.20  |
| Dominica                         | 0.5   | 0.36  | 0.65  | 1.75  | 1.53  | 1.96  | 1.69  | 2.92  | 1.14  |
| Dominican Republic               | 0.06  | 0.07  | 0.06  | 0.2   | 0.21  | 0.19  | 1.77  | 1.65  | 1.95  |
| Ecuador                          | 0.02  | 0.02  | 0.03  | 0.09  | 0.09  | 0.1   | 2.95  | 3.88  | 2.40  |
| Egypt                            | 0.03  | 0.02  | 0.03  | 0.06  | 0.06  | 0.06  | 2.33  | 3.18  | 1.87  |
| El Salvador                      | 0.02  | 0.02  | 0.02  | 0.07  | 0.06  | 0.08  | 2.80  | 2.93  | 2.76  |
| Equatorial Guinea                | 0.1   | 0.12  | 0.09  | 0.28  | 0.27  | 0.28  | 5.03  | 4.69  | 6.09  |
| Eritrea                          | 0.03  | 0.04  | 0.02  | 0.05  | 0.07  | 0.03  | 1.49  | 1.56  | 1.04  |
| Estonia                          | 0.05  | 0.06  | 0.04  | 1.69  | 1.79  | 1.57  | 35.85 | 32.71 | 41.24 |
| Ethiopia                         | 0.05  | 0.05  | 0.05  | 0.06  | 0.07  | 0.05  | 2.76  | 3.36  | 2.50  |
| Federated States of Micronesia   | 0.05  | 0.02  | 0.07  | 0.17  | 0.13  | 0.21  | 3.10  | 5.05  | 2.55  |
| Fiji                             | 0.02  | 0.01  | 0.02  | 0.11  | 0.15  | 0.07  | 3.78  | 7.27  | 1.61  |
| Finland                          | 2.51  | 2.84  | 2.17  | 6.78  | 8.17  | 5.34  | 1.81  | 2.00  | 1.63  |
| France                           | 0.37  | 0.44  | 0.29  | 1.56  | 1.65  | 1.47  | 3.14  | 2.66  | 3.94  |
| Gabon                            | 0.37  | 0.34  | 0.4   | 0.45  | 0.54  | 0.37  | 1.00  | 1.46  | 0.62  |
| Georgia                          | 0.06  | 0.06  | 0.06  | 0.61  | 0.5   | 0.73  | 6.77  | 6.19  | 7.53  |
| Germany                          | 0.99  | 1.08  | 0.88  | 8.17  | 8.25  | 8.08  | 7.77  | 7.66  | 8.22  |
| Ghana                            | 0.02  | 0.03  | 0.01  | 0.04  | 0.04  | 0.03  | 1.68  | 1.55  | 2.31  |

|                          |      |      |      |      |      |      |       |       |       |
|--------------------------|------|------|------|------|------|------|-------|-------|-------|
| Greece                   | 0.45 | 0.48 | 0.43 | 0.4  | 0.42 | 0.38 | -0.27 | -0.28 | -0.24 |
| Greenland                | 0.78 | 0.7  | 0.85 | 1.72 | 1.5  | 1.91 | 1.65  | 1.90  | 1.57  |
| Grenada                  | 0.95 | 0.81 | 1.09 | 1.86 | 2.02 | 1.71 | 1.07  | 1.71  | 0.71  |
| Guam                     | 0.04 | 0.02 | 0.05 | 1.45 | 0.74 | 2.15 | 20.36 | 15.34 | 23.84 |
| Guatemala                | 0.02 | 0.01 | 0.03 | 0.05 | 0.05 | 0.05 | 2.61  | 4.71  | 1.74  |
| Guinea                   | 0.01 | 0.02 | 0.01 | 0.02 | 0.03 | 0.01 | 1.39  | 1.99  | 0.52  |
| Guinea-Bissau            | 0.02 | 0.02 | 0.02 | 0.03 | 0.04 | 0.01 | 0.85  | 1.46  | 0.07  |
| Guyana                   | 0.18 | 0.03 | 0.32 | 0.36 | 0.32 | 0.39 | 1.00  | 8.97  | 0.16  |
| Haiti                    | 0.12 | 0.1  | 0.13 | 0.19 | 0.2  | 0.18 | 1.73  | 2.19  | 1.39  |
| Honduras                 | 0.02 | 0.02 | 0.03 | 0.09 | 0.09 | 0.1  | 3.78  | 4.65  | 3.46  |
| Hungary                  | 0.52 | 0.27 | 0.79 | 3.47 | 3.08 | 3.9  | 6.93  | 12.46 | 5.30  |
| Iceland                  | 0.52 | 0.74 | 0.31 | 0.94 | 1.22 | 0.65 | 1.12  | 1.16  | 1.28  |
| India                    | 0.04 | 0.03 | 0.05 | 0.13 | 0.1  | 0.16 | 3.45  | 3.88  | 3.23  |
| Indonesia                | 0.02 | 0.01 | 0.02 | 0.05 | 0.05 | 0.06 | 3.08  | 3.74  | 2.64  |
| Iran                     | 0.02 | 0.01 | 0.02 | 0.06 | 0.04 | 0.08 | 4.06  | 5.73  | 3.62  |
| Iraq                     | 0.04 | 0.03 | 0.05 | 0.04 | 0.03 | 0.05 | 0.30  | 0.64  | 0.24  |
| Ireland                  | 3.27 | 2.85 | 3.69 | 2.47 | 2.5  | 2.44 | -0.04 | 0.18  | -0.19 |
| Israel                   | 1.05 | 0.83 | 1.28 | 3.13 | 3.15 | 3.11 | 2.24  | 3.01  | 1.79  |
| Italy                    | 1.41 | 1    | 1.85 | 3.37 | 3.57 | 3.16 | 1.11  | 1.95  | 0.62  |
| Jamaica                  | 1.5  | 1.37 | 1.64 | 3.48 | 3.72 | 3.25 | 0.86  | 1.36  | 0.53  |
| Japan                    | 0.06 | 0.05 | 0.08 | 0.9  | 0.99 | 0.81 | 7.97  | 11.33 | 5.75  |
| Jordan                   | 0.02 | 0.02 | 0.02 | 0.03 | 0.03 | 0.04 | 2.13  | 2.44  | 2.00  |
| Kazakhstan               | 0.26 | 0.25 | 0.28 | 0.36 | 0.28 | 0.46 | 0.41  | 0.33  | 0.53  |
| Kenya                    | 0.05 | 0.06 | 0.03 | 0.07 | 0.08 | 0.06 | 1.13  | 1.16  | 1.13  |
| Kiribati                 | 0.03 | 0.03 | 0.03 | 0.12 | 0.09 | 0.15 | 4.59  | 4.14  | 5.23  |
| Kuwait                   | 0.01 | 0    | 0.01 | 0.02 | 0.01 | 0.02 | 1.94  | 2.57  | 1.71  |
| Kyrgyzstan               | 0.26 | 0.25 | 0.28 | 0.25 | 0.16 | 0.34 | 0.23  | -0.04 | 0.44  |
| Laos                     | 0.02 | 0.02 | 0.02 | 0.04 | 0.03 | 0.05 | 4.63  | 5.34  | 4.67  |
| Latvia                   | 0.09 | 0.09 | 0.09 | 2.34 | 2.41 | 2.25 | 25.80 | 27.42 | 25.07 |
| Lebanon                  | 0.05 | 0.03 | 0.06 | 0.1  | 0.09 | 0.11 | 2.03  | 2.44  | 1.96  |
| Lesotho                  | 0.25 | 0.18 | 0.32 | 0.62 | 0.58 | 0.65 | 0.48  | 0.90  | 0.27  |
| Liberia                  | 0.02 | 0.02 | 0.02 | 0.02 | 0.03 | 0.01 | 1.34  | 2.07  | 0.41  |
| Libya                    | 0.01 | 0.01 | 0.02 | 0.05 | 0.04 | 0.07 | 2.34  | 2.70  | 2.21  |
| Lithuania                | 0.14 | 0.16 | 0.13 | 3.25 | 2.35 | 4.28 | 19.61 | 13.16 | 28.75 |
| Luxembourg               | 0.84 | 0.75 | 0.93 | 1.36 | 1.45 | 1.27 | 1.47  | 1.83  | 1.21  |
| Macedonia                | 0.04 | 0.03 | 0.05 | 0.15 | 0.12 | 0.18 | 2.47  | 2.71  | 2.39  |
| Madagascar               | 0.09 | 0.1  | 0.09 | 0.1  | 0.11 | 0.09 | 0.85  | 1.00  | 0.69  |
| Malawi                   | 0.03 | 0.04 | 0.02 | 0.05 | 0.06 | 0.04 | 2.29  | 2.40  | 2.30  |
| Malaysia                 | 0.02 | 0.02 | 0.03 | 0.07 | 0.04 | 0.1  | 1.97  | 2.00  | 1.94  |
| Maldives                 | 0.05 | 0.08 | 0.02 | 0.08 | 0.1  | 0.06 | 2.88  | 3.10  | 4.33  |
| Mali                     | 0.02 | 0.02 | 0.01 | 0.02 | 0.04 | 0.01 | 1.31  | 2.01  | 0.15  |
| Malta                    | 0.96 | 0.81 | 1.12 | 2.91 | 3.14 | 2.68 | 1.65  | 2.28  | 1.19  |
| Marshall Islands         | 0.04 | 0.02 | 0.07 | 0.35 | 0.27 | 0.42 | 6.65  | 10.34 | 5.42  |
| Mauritania               | 0.02 | 0.03 | 0.01 | 0.03 | 0.05 | 0.01 | 1.33  | 1.80  | 0.32  |
| Mauritius                | 0.05 | 0.03 | 0.07 | 0.26 | 0.23 | 0.3  | 3.26  | 5.04  | 2.60  |
| Mexico                   | 0.27 | 0.29 | 0.25 | 0.39 | 0.44 | 0.33 | 0.37  | 0.38  | 0.32  |
| Moldova                  | 0.05 | 0.04 | 0.05 | 1.05 | 0.76 | 1.36 | 23.76 | 20.49 | 26.67 |
| Mongolia                 | 0.06 | 0.03 | 0.09 | 0.11 | 0.05 | 0.17 | 1.40  | 1.65  | 1.26  |
| Montenegro               | 0.15 | 0.16 | 0.14 | 0.29 | 0.27 | 0.31 | 0.64  | 0.66  | 0.73  |
| Morocco                  | 0.04 | 0.03 | 0.06 | 0.09 | 0.06 | 0.11 | 1.36  | 1.51  | 1.35  |
| Mozambique               | 0.03 | 0.04 | 0.03 | 0.07 | 0.08 | 0.07 | 2.91  | 2.85  | 3.36  |
| Myanmar                  | 0.02 | 0.02 | 0.01 | 0.06 | 0.07 | 0.05 | 4.88  | 5.32  | 5.02  |
| Namibia                  | 0.23 | 0.17 | 0.29 | 0.36 | 0.29 | 0.43 | 0.80  | 1.05  | 0.62  |
| Nepal                    | 0.02 | 0.02 | 0.03 | 0.07 | 0.05 | 0.09 | 4.82  | 4.72  | 4.85  |
| Netherlands              | 0.65 | 0.6  | 0.7  | 4.38 | 4.5  | 4.26 | 5.95  | 6.58  | 5.50  |
| New Zealand              | 2.07 | 2    | 2.15 | 2.42 | 2.88 | 1.94 | 0.31  | 0.56  | 0.05  |
| Nicaragua                | 0.02 | 0.01 | 0.02 | 0.07 | 0.06 | 0.07 | 3.48  | 5.49  | 2.47  |
| Niger                    | 0.01 | 0.01 | 0.01 | 0.01 | 0.02 | 0.01 | 2.22  | 3.02  | 1.06  |
| Nigeria                  | 0.02 | 0.02 | 0.02 | 0.03 | 0.04 | 0.02 | 1.57  | 2.42  | 0.79  |
| North Korea              | 0.03 | 0.03 | 0.02 | 0.06 | 0.08 | 0.04 | 0.70  | 0.75  | 0.66  |
| Northern Mariana Islands | 0.07 | 0.07 | 0.07 | 0.47 | 0.55 | 0.39 | 8.52  | 12.82 | 5.93  |
| Norway                   | 0.23 | 0.13 | 0.33 | 2.28 | 2.42 | 2.14 | 12.55 | 23.29 | 8.63  |
| Oman                     | 0.02 | 0.01 | 0.03 | 0.06 | 0.03 | 0.08 | 3.99  | 4.32  | 3.59  |
| Pakistan                 | 0.05 | 0.03 | 0.06 | 0.1  | 0.08 | 0.13 | 2.05  | 3.13  | 1.66  |
| Palestine                | 0.01 | 0.01 | 0.01 | 0.02 | 0.02 | 0.02 | 2.02  | 2.16  | 2.01  |
| Panama                   | 0.61 | 0.5  | 0.72 | 0.94 | 0.91 | 0.97 | 0.32  | 0.59  | 0.17  |
| Papua New Guinea         | 0.02 | 0.01 | 0.03 | 0.06 | 0.04 | 0.09 | 2.60  | 2.91  | 2.61  |
| Paraguay                 | 0.03 | 0.03 | 0.03 | 0.25 | 0.23 | 0.26 | 5.22  | 4.88  | 5.80  |
| Peru                     | 0.04 | 0.04 | 0.04 | 0.09 | 0.1  | 0.09 | 2.83  | 2.95  | 2.90  |
| Philippines              | 0.03 | 0.02 | 0.04 | 0.08 | 0.05 | 0.11 | 2.29  | 2.22  | 2.35  |

|                                  |      |      |      |      |      |      |       |       |        |
|----------------------------------|------|------|------|------|------|------|-------|-------|--------|
| Poland                           | 2.94 | 2.04 | 3.88 | 4.2  | 3.74 | 4.69 | 0.49  | 0.97  | 0.29   |
| Portugal                         | 1.54 | 1.39 | 1.7  | 4.9  | 4.81 | 5.01 | 2.41  | 2.73  | 2.16   |
| Puerto Rico                      | 0.97 | 1.05 | 0.89 | 2.96 | 3.43 | 2.46 | 1.63  | 1.41  | 1.76   |
| Qatar                            | 0.07 | 0.05 | 0.09 | 0.05 | 0.02 | 0.06 | 0.17  | -0.15 | 0.20   |
| Romania                          | 1.11 | 0.57 | 1.67 | 2.1  | 1.22 | 3.04 | 0.54  | 0.74  | 0.49   |
| Russia                           | 0.05 | 0.06 | 0.04 | 4.51 | 4.21 | 4.86 | 89.37 | 82.21 | 102.44 |
| Rwanda                           | 0.06 | 0.06 | 0.05 | 0.08 | 0.08 | 0.07 | 2.20  | 2.37  | 2.17   |
| Saint Lucia                      | 0.98 | 1.12 | 0.84 | 2.71 | 3.58 | 1.8  | 1.63  | 2.01  | 1.10   |
| Saint Vincent and the Grenadines | 0.57 | 1.1  | 0.04 | 0.91 | 0.91 | 0.91 | 0.36  | -0.21 | 15.17  |
| Samoa                            | 0.05 | 0.02 | 0.07 | 0.35 | 0.3  | 0.4  | 5.89  | 9.22  | 5.48   |
| Sao Tome and Principe            | 0.04 | 0.06 | 0.03 | 0.07 | 0.1  | 0.04 | 1.63  | 2.18  | 0.91   |
| Saudi Arabia                     | 0.01 | 0.01 | 0.01 | 0.03 | 0.02 | 0.03 | 5.47  | 6.77  | 4.92   |
| Senegal                          | 0.01 | 0.02 | 0.01 | 0.02 | 0.04 | 0.01 | 1.94  | 2.72  | 0.61   |
| Serbia                           | 0.16 | 0.1  | 0.21 | 0.5  | 0.47 | 0.54 | 1.52  | 2.65  | 1.05   |
| Seychelles                       | 0.08 | 0.07 | 0.08 | 0.18 | 0.19 | 0.16 | 1.54  | 1.77  | 1.33   |
| Sierra Leone                     | 0.01 | 0.01 | 0.01 | 0.02 | 0.03 | 0.01 | 1.87  | 3.00  | 0.73   |
| Singapore                        | 0.09 | 0.12 | 0.07 | 1.43 | 1.69 | 1.15 | 12.87 | 10.97 | 15.46  |
| Slovakia                         | 0.13 | 0.09 | 0.18 | 1.05 | 1.04 | 1.06 | 8.25  | 11.89 | 6.58   |
| Slovenia                         | 0.09 | 0.05 | 0.13 | 0.37 | 0.39 | 0.35 | 3.23  | 6.83  | 1.89   |
| Solomon Islands                  | 0.02 | 0.01 | 0.04 | 0.1  | 0.05 | 0.14 | 3.80  | 4.39  | 3.81   |
| Somalia                          | 0.08 | 0.1  | 0.05 | 0.06 | 0.08 | 0.04 | 0.18  | 0.20  | 0.20   |
| South Africa                     | 0.86 | 0.75 | 0.98 | 1.78 | 1.5  | 2.07 | 0.77  | 0.79  | 0.76   |
| South Korea                      | 0.17 | 0.06 | 0.27 | 0.32 | 0.25 | 0.39 | 0.68  | 2.42  | 0.29   |
| South Sudan                      | 0.06 | 0.07 | 0.05 | 0.08 | 0.09 | 0.07 | 1.03  | 1.06  | 1.12   |
| Spain                            | 0.94 | 0.81 | 1.07 | 3.29 | 3.32 | 3.26 | 2.59  | 3.01  | 2.29   |
| Sri Lanka                        | 0.05 | 0.03 | 0.07 | 0.13 | 0.09 | 0.17 | 1.58  | 1.64  | 1.64   |
| Sudan                            | 0.01 | 0.01 | 0.01 | 0.02 | 0.01 | 0.02 | 2.54  | 2.68  | 2.53   |
| Suriname                         | 0.08 | 0.03 | 0.13 | 0.15 | 0.1  | 0.21 | 0.71  | 1.98  | 0.42   |
| Swaziland                        | 0.24 | 0.14 | 0.35 | 0.57 | 0.46 | 0.67 | 0.53  | 0.97  | 0.27   |
| Sweden                           | 1.83 | 2.11 | 1.54 | 3    | 3.53 | 2.46 | 0.94  | 0.87  | 1.02   |
| Switzerland                      | 2.6  | 2.45 | 2.75 | 2.42 | 2.31 | 2.53 | 0.11  | 0.09  | 0.15   |
| Syria                            | 0.03 | 0.02 | 0.04 | 0.06 | 0.04 | 0.07 | 0.65  | 1.30  | 0.39   |
| Taiwan                           | 0.06 | 0.05 | 0.07 | 0.15 | 0.13 | 0.18 | 1.12  | 1.47  | 1.11   |
| Tajikistan                       | 0.03 | 0.03 | 0.03 | 0.04 | 0.04 | 0.05 | 1.80  | 1.65  | 1.89   |
| Tanzania                         | 0.07 | 0.07 | 0.07 | 0.1  | 0.1  | 0.1  | 1.62  | 1.58  | 1.70   |
| Thailand                         | 0.02 | 0.02 | 0.03 | 0.11 | 0.09 | 0.13 | 2.00  | 2.15  | 1.95   |
| The Bahamas                      | 0.75 | 0.66 | 0.83 | 1.98 | 2.35 | 1.59 | 1.36  | 2.03  | 0.84   |
| The Gambia                       | 0.01 | 0.02 | 0.01 | 0.02 | 0.03 | 0.01 | 1.66  | 2.80  | 0.52   |
| Timor-Leste                      | 0.01 | 0.01 | 0.01 | 0.02 | 0.02 | 0.02 | 6.39  | 7.43  | 5.71   |
| Togo                             | 0.01 | 0.02 | 0.01 | 0.02 | 0.03 | 0.01 | 0.97  | 1.65  | 0.23   |
| Tonga                            | 0.05 | 0.04 | 0.06 | 0.29 | 0.25 | 0.32 | 4.38  | 6.74  | 3.51   |
| Trinidad and Tobago              | 0.7  | 0.65 | 0.75 | 1.53 | 1.86 | 1.2  | 0.83  | 1.60  | 0.28   |
| Tunisia                          | 0.04 | 0.02 | 0.07 | 0.11 | 0.07 | 0.15 | 1.51  | 3.00  | 1.17   |
| Turkey                           | 0.52 | 0.35 | 0.69 | 0.64 | 0.48 | 0.8  | 1.20  | 1.68  | 1.10   |
| Turkmenistan                     | 0.04 | 0.04 | 0.05 | 0.18 | 0.13 | 0.22 | 4.80  | 4.27  | 5.16   |
| Uganda                           | 0.06 | 0.06 | 0.06 | 0.08 | 0.07 | 0.09 | 1.79  | 1.87  | 1.87   |
| Ukraine                          | 0.15 | 0.16 | 0.14 | 0.97 | 0.84 | 1.14 | 4.45  | 3.86  | 5.37   |
| United Arab Emirates             | 0.02 | 0.01 | 0.02 | 0.03 | 0.02 | 0.04 | 1.32  | 1.84  | 1.24   |
| United Kingdom                   | 4.58 | 4.86 | 4.28 | 4.56 | 5.54 | 3.55 | 0.21  | 0.36  | 0.02   |
| United States                    | 1.52 | 1.58 | 1.46 | 2.64 | 2.84 | 2.43 | 0.79  | 0.79  | 0.79   |
| Uruguay                          | 0.16 | 0.08 | 0.25 | 0.22 | 0.26 | 0.18 | 0.25  | 1.71  | -0.26  |
| Uzbekistan                       | 0.05 | 0.05 | 0.04 | 0.08 | 0.08 | 0.08 | 0.98  | 1.02  | 1.09   |
| Vanuatu                          | 0.03 | 0.01 | 0.05 | 0.09 | 0.04 | 0.13 | 1.77  | 2.07  | 1.87   |
| Venezuela                        | 0.16 | 0.17 | 0.15 | 0.26 | 0.32 | 0.2  | 0.33  | 0.63  | 0.07   |
| Vietnam                          | 0.02 | 0.03 | 0.02 | 0.13 | 0.14 | 0.12 | 4.83  | 4.83  | 5.24   |
| Virgin Islands, U.S.             | 0.47 | 0.24 | 0.71 | 4.2  | 6.21 | 2    | 3.27  | 11.74 | 0.33   |
| Yemen                            | 0.01 | 0.01 | 0.01 | 0.01 | 0.01 | 0.02 | 3.06  | 3.11  | 3.37   |
| Zambia                           | 0.06 | 0.07 | 0.04 | 0.09 | 0.1  | 0.09 | 1.54  | 1.26  | 2.09   |
| Zimbabwe                         | 0.02 | 0.02 | 0.02 | 0.03 | 0.02 | 0.03 | 0.57  | 0.36  | 0.77   |



|                                  |         |         |         |         |         |         |       |       |       |
|----------------------------------|---------|---------|---------|---------|---------|---------|-------|-------|-------|
| Niger                            | 920.69  | 916.3   | 925.23  | 1001.67 | 929.14  | 1073.02 | 0.10  | 0.02  | 0.18  |
| Nigeria                          | 1049.31 | 1048.39 | 1050.2  | 1050.81 | 1018.67 | 1081.75 | 0.00  | -0.03 | 0.03  |
| North Korea                      | 944.79  | 1211.46 | 662.36  | 1656.43 | 2036.1  | 1259.65 | 0.76  | 0.69  | 0.91  |
| Northern Mariana Islands         | 521.05  | 484.89  | 553.55  | 556.12  | 465.28  | 647.61  | 0.08  | -0.03 | 0.20  |
| Norway                           | 3534.45 | 3918.36 | 3141.88 | 3339.11 | 3621.52 | 3059.98 | -0.06 | -0.08 | -0.04 |
| Oman                             | 692.62  | 775.4   | 626.58  | 927.08  | 995.85  | 892.21  | 0.33  | 0.28  | 0.42  |
| Pakistan                         | 1115    | 1032.97 | 1191.14 | 1365.3  | 1362.73 | 1367.73 | 0.23  | 0.32  | 0.15  |
| Palestine                        | 720.54  | 730.46  | 710.85  | 962.48  | 973.74  | 951.54  | 0.32  | 0.32  | 0.32  |
| Panama                           | 1618.25 | 1631.84 | 1604.97 | 2758.78 | 2781.19 | 2736.5  | 0.73  | 0.73  | 0.74  |
| Papua New Guinea                 | 535.02  | 575.26  | 496.61  | 745.85  | 808.33  | 685.82  | 0.40  | 0.41  | 0.38  |
| Paraguay                         | 1826.31 | 1881.81 | 1772.07 | 2755.34 | 2741.87 | 2768.41 | 0.49  | 0.44  | 0.55  |
| Peru                             | 1374.51 | 1391.73 | 1357.29 | 2341.98 | 2402.79 | 2281.09 | 0.71  | 0.73  | 0.68  |
| Philippines                      | 844.85  | 903.86  | 787.07  | 1333.92 | 1437.93 | 1231.83 | 0.59  | 0.60  | 0.58  |
| Poland                           | 3309.85 | 3782.62 | 2812.62 | 4927.57 | 5581.34 | 4223.97 | 0.47  | 0.46  | 0.49  |
| Portugal                         | 3158.33 | 3428.56 | 2867.69 | 4204.05 | 4624.75 | 3755.43 | 0.31  | 0.33  | 0.28  |
| Puerto Rico                      | 2908.24 | 2889.54 | 2928.13 | 4391.75 | 4660.6  | 4101.32 | 0.50  | 0.60  | 0.39  |
| Qatar                            | 666.48  | 557.16  | 720.45  | 727.57  | 673.31  | 747.87  | 0.08  | 0.19  | 0.03  |
| Romania                          | 3330.32 | 3613.59 | 3038.91 | 5377.08 | 5938.67 | 4779.33 | 0.60  | 0.63  | 0.56  |
| Russia                           | 2918.43 | 3657.95 | 2078.64 | 4140.65 | 4943.21 | 3198.16 | 0.41  | 0.34  | 0.52  |
| Rwanda                           | 796.41  | 814.4   | 777.77  | 990.41  | 1060.83 | 913.81  | 0.25  | 0.31  | 0.18  |
| Saint Lucia                      | 1968.32 | 1987.72 | 1948.36 | 2801.32 | 2834.37 | 2767    | 0.44  | 0.44  | 0.45  |
| Saint Vincent and the Grenadines | 1707.02 | 1813.41 | 1599.56 | 2420.73 | 2433.4  | 2408.3  | 0.43  | 0.34  | 0.52  |
| Samoa                            | 942.59  | 1016.44 | 874.52  | 1358.35 | 1494.17 | 1230.81 | 0.43  | 0.46  | 0.40  |
| Sao Tome and Principe            | 1575.88 | 1562.81 | 1589.2  | 1241.91 | 1280.37 | 1203.17 | -0.21 | -0.18 | -0.24 |
| Saudi Arabia                     | 836.62  | 882.68  | 800.39  | 1195.32 | 1138.14 | 1239.25 | 0.41  | 0.27  | 0.52  |
| Senegal                          | 1046.87 | 1038.63 | 1055.19 | 1064.67 | 1106.57 | 1021.23 | 0.02  | 0.07  | -0.02 |
| Serbia                           | 3041.48 | 3290.16 | 2786.11 | 4997.18 | 5416.27 | 4557.62 | 0.63  | 0.63  | 0.62  |
| Seychelles                       | 1809.61 | 2031.62 | 1586.65 | 2410.92 | 2663.64 | 2164.9  | 0.33  | 0.31  | 0.36  |
| Sierra Leone                     | 1209.4  | 1114.16 | 1306.62 | 1057.8  | 1002.92 | 1113.81 | -0.11 | -0.09 | -0.13 |
| Singapore                        | 1257.8  | 1454.74 | 1065.99 | 2410.33 | 2829.11 | 1976.62 | 0.87  | 0.91  | 0.81  |
| Slovakia                         | 2824.71 | 3155.75 | 2478.02 | 4028.18 | 4614.69 | 3409.31 | 0.41  | 0.45  | 0.36  |
| Slovenia                         | 3270.8  | 3827.51 | 2680.49 | 5184.2  | 5802.76 | 4554.53 | 0.56  | 0.50  | 0.67  |
| Solomon Islands                  | 646.7   | 598.25  | 692.57  | 789.77  | 769.68  | 809.24  | 0.22  | 0.29  | 0.17  |
| Somalia                          | 1129.89 | 1130.68 | 1129.08 | 1010.61 | 1003.73 | 1017.57 | -0.10 | -0.11 | -0.10 |
| South Africa                     | 2032.84 | 2221.59 | 1839.7  | 2624.16 | 2946.71 | 2290.22 | 0.29  | 0.32  | 0.24  |
| South Korea                      | 896.83  | 1039.76 | 754.53  | 2103.85 | 2438.56 | 1765.08 | 1.28  | 1.28  | 1.26  |
| South Sudan                      | 1111.32 | 1101.2  | 1121.53 | 1252.02 | 1235.41 | 1268.59 | 0.13  | 0.12  | 0.13  |
| Spain                            | 3084.81 | 3508.59 | 2643.3  | 3690.96 | 4212.75 | 3155.7  | 0.19  | 0.19  | 0.18  |
| Sri Lanka                        | 1412.11 | 1362.06 | 1461.19 | 2396.45 | 2506.03 | 2278.65 | 0.72  | 0.86  | 0.59  |
| Sudan                            | 832.9   | 820.08  | 845.62  | 991.79  | 993.63  | 989.98  | 0.20  | 0.21  | 0.18  |
| Suriname                         | 1495.94 | 1529.7  | 1463.25 | 2232.21 | 2351.7  | 2113.17 | 0.49  | 0.53  | 0.44  |
| Swaziland                        | 1266.67 | 1304.25 | 1224.63 | 1570.67 | 1677.84 | 1461.24 | 0.24  | 0.28  | 0.19  |
| Sweden                           | 3980.33 | 4307.61 | 3645.12 | 3946.38 | 4163.01 | 3729.31 | -0.02 | -0.04 | 0.01  |
| Switzerland                      | 3276.34 | 3678.81 | 2854.85 | 3654.46 | 3980.85 | 3320.71 | 0.11  | 0.08  | 0.15  |
| Syria                            | 912.44  | 877.74  | 946.04  | 1331.3  | 1364.61 | 1298.81 | 0.45  | 0.55  | 0.36  |
| Taiwan                           | 1131.49 | 1148.79 | 1115.42 | 2335.74 | 2491.2  | 2179.77 | 1.11  | 1.19  | 1.02  |
| Tajikistan                       | 1160.66 | 1272.42 | 1047.56 | 1100.86 | 1090.11 | 1111.35 | -0.05 | -0.15 | 0.06  |
| Tanzania                         | 1063.34 | 1084.13 | 1042.18 | 1169.81 | 1131.89 | 1208.2  | 0.12  | 0.06  | 0.18  |
| Thailand                         | 1290.34 | 1331.23 | 1248.69 | 2875.24 | 2984.18 | 2763.18 | 1.23  | 1.23  | 1.21  |
| The Bahamas                      | 1481.12 | 1582.98 | 1377.84 | 2813.65 | 2967.85 | 2652.85 | 0.88  | 0.85  | 0.91  |
| The Gambia                       | 929.27  | 808.1   | 1048.71 | 920.63  | 836.31  | 1006.61 | -0.01 | 0.04  | -0.04 |
| Timor-Leste                      | 595.41  | 604.1   | 586.93  | 1184.55 | 1204.26 | 1165.45 | 1.01  | 1.01  | 1.00  |
| Togo                             | 994.28  | 1005.84 | 982.42  | 991.53  | 994.77  | 988.21  | 0.01  | -0.01 | 0.02  |
| Tonga                            | 1084.88 | 1155.84 | 1015.64 | 1471.79 | 1649.12 | 1295.42 | 0.35  | 0.42  | 0.27  |
| Trinidad and Tobago              | 1738.38 | 1805.54 | 1670.72 | 3015.62 | 3129.9  | 2898.31 | 0.72  | 0.71  | 0.72  |
| Tunisia                          | 1400.18 | 1350.87 | 1448.9  | 2431.95 | 2481.26 | 2381.48 | 0.71  | 0.81  | 0.62  |
| Turkey                           | 1755.5  | 1785.16 | 1725.11 | 2339.36 | 2509.14 | 2163.57 | 0.32  | 0.40  | 0.25  |
| Turkmenistan                     | 1207.86 | 1386.78 | 1023.93 | 1553.45 | 1695.82 | 1406.22 | 0.28  | 0.21  | 0.36  |
| Uganda                           | 878.01  | 880.93  | 875.05  | 798.82  | 814.51  | 783.12  | -0.08 | -0.07 | -0.09 |
| Ukraine                          | 3526.71 | 4248.6  | 2686.65 | 4909.64 | 5770.37 | 3893    | 0.38  | 0.35  | 0.44  |
| United Arab Emirates             | 529.03  | 483.97  | 552.43  | 745.64  | 528.24  | 824.88  | 0.39  | 0.08  | 0.47  |

|                      |         |         |         |         |         |         |       |       |      |
|----------------------|---------|---------|---------|---------|---------|---------|-------|-------|------|
| United Kingdom       | 3565.3  | 3937.99 | 3171.08 | 3700.62 | 3907.67 | 3488.4  | 0.03  | -0.01 | 0.09 |
| United States        | 1850.29 | 1942.03 | 1753.81 | 2437.32 | 2512.79 | 2359.29 | 0.31  | 0.29  | 0.33 |
| Uruguay              | 2351.52 | 2484.69 | 2210.15 | 2716.66 | 3063.44 | 2345.18 | 0.15  | 0.22  | 0.05 |
| Uzbekistan           | 1166.08 | 1329.11 | 999.43  | 1510.93 | 1640.35 | 1377.26 | 0.29  | 0.22  | 0.37 |
| Vanuatu              | 856.07  | 760.26  | 946.66  | 1033.52 | 1029.01 | 1037.92 | 0.17  | 0.32  | 0.05 |
| Venezuela            | 1412.82 | 1466.87 | 1359.6  | 2433.06 | 2527.32 | 2338    | 0.70  | 0.71  | 0.69 |
| Vietnam              | 1372.14 | 1558.32 | 1180.22 | 1949.13 | 2245.68 | 1646.19 | 0.45  | 0.46  | 0.44 |
| Virgin Islands, U.S. | 2006.67 | 2004.24 | 2009.25 | 5070.66 | 5079.72 | 5060.7  | 1.50  | 1.51  | 1.49 |
| Yemen                | 729.57  | 784.53  | 673.61  | 845.63  | 851.53  | 839.86  | 0.16  | 0.08  | 0.24 |
| Zambia               | 976.37  | 989.68  | 962.83  | 1052.86 | 1082.57 | 1023.07 | 0.09  | 0.11  | 0.08 |
| Zimbabwe             | 1256.38 | 1272.13 | 1240.49 | 1235.23 | 1240    | 1230.32 | -0.01 | -0.02 | 0.00 |

eTable 4c. All-ages DALY rate for men and women separately and combined, for all CVD level 3 and 4 subcauses, by country in 1990 and 2015

|                                  | 1990   |        |        | 2015   |        |        | Median percent change between 1990-2015 |        |       |
|----------------------------------|--------|--------|--------|--------|--------|--------|-----------------------------------------|--------|-------|
|                                  | Both   | Female | Male   | Both   | Female | Male   | Both                                    | Female | Male  |
| <b>Aortic aneurysm</b>           |        |        |        |        |        |        |                                         |        |       |
| Afghanistan                      | 15.76  | 8.49   | 22.67  | 21.96  | 12.07  | 31.25  | 1.29                                    | 1.44   | 1.18  |
| Albania                          | 16     | 9.91   | 21.8   | 31.42  | 20.04  | 42.99  | 1.21                                    | 1.34   | 1.15  |
| Algeria                          | 11.41  | 7.07   | 15.64  | 15.75  | 11.54  | 19.9   | 0.98                                    | 1.31   | 0.84  |
| American Samoa                   | 38.18  | 30.67  | 45.3   | 32.48  | 29.68  | 35.27  | 0.03                                    | 0.02   | 0.05  |
| Andorra                          | 91.17  | 48.84  | 135.81 | 92.29  | 44.31  | 142.29 | 0.02                                    | -0.07  | 0.04  |
| Angola                           | 24.34  | 13.07  | 35.89  | 23.92  | 16.67  | 31.27  | 0.97                                    | 1.44   | 0.82  |
| Antigua and Barbuda              | 37.22  | 27.2   | 47.94  | 39.44  | 29.63  | 50.14  | 0.17                                    | 0.19   | 0.17  |
| Argentina                        | 112.32 | 59.61  | 167.1  | 102.36 | 60.7   | 145.82 | 0.08                                    | 0.16   | 0.07  |
| Armenia                          | 91.84  | 58.85  | 126.81 | 156.51 | 97.4   | 224.59 | 0.90                                    | 0.86   | 0.94  |
| Australia                        | 131.11 | 74.48  | 188.04 | 78.12  | 53.83  | 102.47 | -0.31                                   | -0.20  | -0.34 |
| Austria                          | 95.25  | 62.89  | 130.51 | 73.53  | 52.01  | 96.12  | -0.08                                   | -0.03  | -0.11 |
| Azerbaijan                       | 21.43  | 9.41   | 33.96  | 28.58  | 13.36  | 43.98  | 1.01                                    | 1.17   | 0.94  |
| Bahrain                          | 10.73  | 4.72   | 15.15  | 8.8    | 4.21   | 11.61  | 0.19                                    | 0.25   | 0.14  |
| Bangladesh                       | 7.79   | 5.54   | 9.94   | 13.55  | 10.39  | 16.64  | 3.04                                    | 3.71   | 2.63  |
| Barbados                         | 60.66  | 34.29  | 89.07  | 76.71  | 47.88  | 108.05 | 0.20                                    | 0.29   | 0.18  |
| Belarus                          | 39.08  | 22.69  | 57.64  | 91.04  | 47.86  | 141.13 | 1.01                                    | 0.98   | 0.97  |
| Belgium                          | 116.01 | 55.76  | 179.05 | 92.67  | 46.6   | 140.56 | -0.09                                   | -0.06  | -0.09 |
| Belize                           | 18.37  | 15.57  | 21.13  | 28.06  | 21.99  | 34.16  | 0.82                                    | 0.78   | 0.84  |
| Benin                            | 14.18  | 12.56  | 15.9   | 10.85  | 5.73   | 15.99  | 0.45                                    | -0.14  | 0.88  |
| Bermuda                          | 165.75 | 69.61  | 263.1  | 134.37 | 63.32  | 206.78 | 0.03                                    | 0.09   | 0.04  |
| Bhutan                           | 8.12   | 5.69   | 10.38  | 17.05  | 10.57  | 22.63  | 3.71                                    | 3.53   | 3.54  |
| Bolivia                          | 13.66  | 9.55   | 17.75  | 18.99  | 14.5   | 23.46  | 2.00                                    | 2.29   | 1.84  |
| Bosnia and Herzegovina           | 47.02  | 24.84  | 69.23  | 72.59  | 40.53  | 104.94 | 0.57                                    | 0.60   | 0.59  |
| Botswana                         | 27.45  | 19.59  | 35.51  | 42.27  | 21.48  | 63.08  | 0.19                                    | -0.15  | 0.35  |
| Brazil                           | 56.9   | 30.59  | 83.62  | 95.73  | 66.3   | 126.14 | 1.12                                    | 1.72   | 0.90  |
| Brunei                           | 36.61  | 29.76  | 42.74  | 55.49  | 50.98  | 59.73  | 0.55                                    | 0.74   | 0.43  |
| Bulgaria                         | 54.65  | 30.52  | 79.46  | 85.84  | 52.53  | 120.8  | 0.53                                    | 0.64   | 0.51  |
| Burkina Faso                     | 18.74  | 19.4   | 18.04  | 11.14  | 8.44   | 13.87  | 0.10                                    | -0.21  | 0.44  |
| Burundi                          | 42.87  | 21.48  | 65.01  | 17.37  | 10.28  | 24.63  | -0.09                                   | 0.08   | -0.17 |
| Cambodia                         | 16.03  | 11.2   | 21.19  | 22.48  | 16.94  | 28.29  | 2.42                                    | 2.79   | 2.18  |
| Cameroon                         | 24.02  | 22.67  | 25.37  | 13.77  | 7.86   | 19.68  | -0.24                                   | -0.54  | 0.01  |
| Canada                           | 111.99 | 61.77  | 163.08 | 75.41  | 46.53  | 104.7  | -0.30                                   | -0.25  | -0.30 |
| Cape Verde                       | 8.08   | 3.32   | 13.35  | 11.78  | 4.88   | 18.86  | 1.25                                    | 1.31   | 1.17  |
| Central African Republic         | 35.83  | 16.37  | 55.95  | 41.52  | 18.34  | 65.31  | 0.41                                    | 0.30   | 0.40  |
| Chad                             | 13.7   | 13.42  | 13.98  | 9.08   | 5.37   | 12.78  | -0.04                                   | -0.43  | 0.31  |
| Chile                            | 46.47  | 30.65  | 62.72  | 67.7   | 50.56  | 85.29  | 0.67                                    | 0.78   | 0.65  |
| China                            | 15.06  | 8.33   | 21.44  | 20.3   | 10.71  | 29.35  | 1.00                                    | 1.09   | 0.90  |
| Colombia                         | 42.58  | 22.3   | 63.12  | 48.75  | 28.47  | 69.66  | 0.53                                    | 0.58   | 0.56  |
| Comoros                          | 31.4   | 13.53  | 49.15  | 18.96  | 10.02  | 27.75  | 0.31                                    | 0.60   | 0.22  |
| Congo                            | 38.71  | 21.83  | 55.67  | 31.55  | 26.96  | 36.13  | 0.16                                    | 0.54   | 0.03  |
| Costa Rica                       | 27.99  | 11.75  | 43.98  | 46.62  | 21.63  | 71.57  | 0.75                                    | 0.91   | 0.72  |
| Cote d'Ivoire                    | 21.4   | 14.62  | 27.65  | 13.27  | 5.94   | 20.35  | -0.13                                   | -0.42  | 0.01  |
| Croatia                          | 56.34  | 32.24  | 81.95  | 122.76 | 65.88  | 183.8  | 1.35                                    | 1.11   | 1.51  |
| Cuba                             | 87.37  | 44.47  | 129.63 | 109.68 | 61.46  | 157.45 | 0.20                                    | 0.32   | 0.17  |
| Cyprus                           | 108.3  | 45.85  | 172.33 | 78.17  | 32.24  | 127.28 | -0.16                                   | -0.17  | -0.15 |
| Czech Republic                   | 58.62  | 29.33  | 89.67  | 86.69  | 54.64  | 119.77 | 0.84                                    | 1.24   | 0.71  |
| Democratic Republic of the Congo | 14.18  | 10.67  | 17.78  | 16.92  | 10.75  | 23.13  | 0.94                                    | 0.63   | 1.12  |
| Denmark                          | 178.72 | 90.3   | 269.72 | 152.42 | 90.36  | 215.46 | 0.05                                    | 0.21   | 0.01  |
| Djibouti                         | 29.12  | 11.88  | 46.15  | 39.63  | 15.91  | 63.15  | 0.85                                    | 0.83   | 0.81  |
| Dominica                         | 49.81  | 44.32  | 55.33  | 90.13  | 67.49  | 113.13 | 0.64                                    | 0.51   | 0.71  |
| Dominican Republic               | 16.34  | 8.68   | 23.9   | 25.95  | 15.38  | 36.59  | 1.14                                    | 1.44   | 1.03  |
| Ecuador                          | 21.96  | 15.39  | 28.46  | 34.23  | 23.86  | 44.6   | 1.18                                    | 1.21   | 1.16  |
| Egypt                            | 37.92  | 29.4   | 46.39  | 46.07  | 34.69  | 57.21  | 1.10                                    | 1.13   | 1.06  |
| El Salvador                      | 14.12  | 6.6    | 22     | 21.15  | 9.96   | 33.79  | 1.23                                    | 1.23   | 1.26  |
| Equatorial Guinea                | 39.14  | 20.35  | 57.12  | 35.32  | 21.85  | 48.12  | 0.72                                    | 1.01   | 0.61  |
| Eritrea                          | 24.59  | 11.81  | 37.53  | 24.16  | 14.36  | 33.92  | 0.72                                    | 1.03   | 0.59  |
| Estonia                          | 73.68  | 46.18  | 104.97 | 88.02  | 56.69  | 124.8  | 0.52                                    | 0.46   | 0.60  |

|                                |        |       |        |        |        |        |       |       |       |
|--------------------------------|--------|-------|--------|--------|--------|--------|-------|-------|-------|
| Ethiopia                       | 29.83  | 12.2  | 47.56  | 17.18  | 9.29   | 25.1   | 0.79  | 1.31  | 0.64  |
| Federated States of Micronesia | 46.85  | 28.69 | 64.23  | 58.76  | 40.67  | 76     | 0.69  | 0.90  | 0.60  |
| Fiji                           | 63.43  | 40.05 | 86.09  | 109.49 | 85.48  | 132.71 | 0.50  | 0.79  | 0.39  |
| Finland                        | 180.02 | 84.74 | 281.1  | 157.14 | 83.73  | 232.8  | 0.00  | 0.10  | -0.02 |
| France                         | 84.26  | 41.64 | 129.2  | 78.92  | 39.27  | 121.12 | 0.04  | 0.02  | 0.07  |
| Gabon                          | 60.35  | 31.72 | 90.18  | 46.3   | 31.55  | 60.72  | 0.15  | 0.44  | 0.02  |
| Georgia                        | 23.47  | 12.26 | 35.84  | 78.66  | 27.09  | 135.06 | 2.38  | 1.38  | 2.62  |
| Germany                        | 93.96  | 58.42 | 132.14 | 88.11  | 58.58  | 118.65 | 0.05  | 0.13  | 0.01  |
| Ghana                          | 26.83  | 35.73 | 18.22  | 18.88  | 19.2   | 18.55  | 0.18  | -0.07 | 0.62  |
| Greece                         | 109.91 | 61.36 | 159.7  | 157.1  | 81.71  | 236.23 | 0.45  | 0.34  | 0.51  |
| Greenland                      | 36.29  | 25.08 | 45.99  | 37.67  | 27.33  | 46.63  | 0.45  | 0.56  | 0.39  |
| Grenada                        | 64.41  | 33.42 | 96.22  | 85.46  | 42.25  | 128.39 | 0.45  | 0.42  | 0.44  |
| Guam                           | 87.37  | 23.94 | 142.78 | 127.14 | 57.68  | 194.65 | 0.08  | 0.77  | 0.00  |
| Guatemala                      | 12.1   | 6.37  | 17.91  | 11.64  | 5.87   | 17.66  | 0.77  | 0.75  | 0.75  |
| Guinea                         | 13.62  | 14.4  | 12.82  | 9.47   | 5.18   | 13.74  | 0.30  | -0.32 | 0.95  |
| Guinea-Bissau                  | 21.67  | 19.09 | 24.31  | 13.21  | 7.23   | 19.27  | -0.11 | -0.45 | 0.17  |
| Guyana                         | 27.32  | 18.47 | 36.46  | 53.6   | 34.61  | 72.41  | 1.23  | 1.18  | 1.23  |
| Haiti                          | 28.33  | 21.27 | 35.61  | 30.12  | 22.01  | 38.4   | 1.04  | 0.95  | 1.11  |
| Honduras                       | 7.45   | 5.45  | 9.44   | 13.08  | 5.57   | 20.6   | 1.75  | 0.55  | 2.51  |
| Hungary                        | 74.34  | 50.88 | 99.71  | 85.17  | 62.23  | 110.45 | 0.47  | 0.46  | 0.51  |
| Iceland                        | 71.92  | 46.29 | 97.33  | 62.88  | 35.38  | 90.97  | 0.02  | -0.10 | 0.07  |
| India                          | 11.7   | 7.16  | 15.93  | 30.97  | 17.47  | 43.52  | 3.55  | 3.58  | 3.34  |
| Indonesia                      | 14.92  | 10.86 | 18.95  | 27.36  | 19.53  | 35.08  | 1.83  | 1.88  | 1.76  |
| Iran                           | 6.75   | 3.93  | 9.46   | 13.92  | 8.61   | 19.15  | 2.94  | 3.45  | 2.68  |
| Iraq                           | 35.69  | 32.13 | 39.18  | 42.93  | 35.81  | 49.88  | 0.49  | 0.50  | 0.48  |
| Ireland                        | 89.77  | 56.37 | 123.46 | 79.04  | 46.21  | 112.85 | 0.08  | 0.01  | 0.12  |
| Israel                         | 36.27  | 21.98 | 50.61  | 31.28  | 17.9   | 44.88  | 0.04  | -0.03 | 0.08  |
| Italy                          | 80.9   | 33.68 | 131    | 98.46  | 48.07  | 152.03 | 0.33  | 0.48  | 0.34  |
| Jamaica                        | 25.55  | 21.84 | 29.34  | 47.56  | 34.9   | 60.33  | 0.77  | 0.58  | 0.89  |
| Japan                          | 75.27  | 53.28 | 98.05  | 161.82 | 125.21 | 200.36 | 0.91  | 1.12  | 0.78  |
| Jordan                         | 20.24  | 10.97 | 28.63  | 17.75  | 9.64   | 25.47  | 0.32  | 0.37  | 0.30  |
| Kazakhstan                     | 56.04  | 32.11 | 81.47  | 62.56  | 30.35  | 97.08  | 0.21  | 0.08  | 0.25  |
| Kenya                          | 12.04  | 7.19  | 16.93  | 17.72  | 9.45   | 26     | 1.04  | 0.86  | 1.09  |
| Kiribati                       | 19.92  | 13.22 | 26.76  | 25.51  | 19.81  | 31.37  | 0.81  | 1.31  | 0.55  |
| Kuwait                         | 11.16  | 6.92  | 14.87  | 15.32  | 7.97   | 21.06  | 0.70  | 0.34  | 0.84  |
| Kyrgyzstan                     | 13.49  | 9.46  | 17.69  | 13.11  | 8.48   | 17.84  | 0.37  | 0.34  | 0.37  |
| Laos                           | 21.08  | 14    | 28.17  | 19.56  | 14.25  | 24.93  | 1.57  | 1.94  | 1.37  |
| Latvia                         | 63.28  | 34.4  | 96.55  | 74.33  | 39.86  | 114.47 | 0.36  | 0.31  | 0.41  |
| Lebanon                        | 21.68  | 12.29 | 31.34  | 17.71  | 12.73  | 22.65  | 0.42  | 0.60  | 0.39  |
| Lesotho                        | 26.58  | 17.69 | 35.99  | 42.42  | 22.91  | 62.32  | 0.00  | -0.23 | 0.11  |
| Liberia                        | 14.9   | 13.8  | 15.99  | 7.02   | 4.32   | 9.69   | 0.22  | -0.24 | 0.64  |
| Libya                          | 8.59   | 5.83  | 11.06  | 15.9   | 9.5    | 22.23  | 0.97  | 0.91  | 0.96  |
| Lithuania                      | 54.61  | 30.97 | 80.91  | 85.69  | 44.85  | 133.18 | 0.58  | 0.47  | 0.63  |
| Luxembourg                     | 106.65 | 56.49 | 158.85 | 61.36  | 35.99  | 86.83  | -0.18 | -0.14 | -0.17 |
| Macedonia                      | 23.26  | 11.83 | 34.55  | 44.68  | 22.06  | 67.5   | 1.07  | 1.01  | 1.11  |
| Madagascar                     | 40.02  | 18.5  | 61.6   | 41.6   | 20.36  | 62.98  | 0.93  | 1.07  | 0.83  |
| Malawi                         | 12.54  | 8.32  | 16.91  | 13.22  | 6.84   | 19.62  | 1.27  | 0.81  | 1.42  |
| Malaysia                       | 35.26  | 18.15 | 51.87  | 47.05  | 21.7   | 72.88  | 0.41  | 0.36  | 0.40  |
| Maldives                       | 20.65  | 14.26 | 26.72  | 14.99  | 9.65   | 20.3   | 0.95  | 0.91  | 0.95  |
| Mali                           | 16.64  | 17.59 | 15.68  | 5.96   | 4.87   | 7.04   | -0.37 | -0.52 | -0.20 |
| Malta                          | 48.56  | 20.64 | 77.46  | 56.13  | 24.24  | 88.28  | 0.16  | 0.18  | 0.15  |
| Marshall Islands               | 39.33  | 21.3  | 56.58  | 58.71  | 34.06  | 82.52  | 0.79  | 0.89  | 0.77  |
| Mauritania                     | 18.65  | 15.58 | 21.74  | 7.5    | 5.48   | 9.49   | -0.27 | -0.38 | -0.19 |
| Mauritius                      | 23.93  | 15.86 | 32.04  | 25.35  | 14.65  | 36.31  | 0.04  | -0.11 | 0.13  |
| Mexico                         | 12.61  | 6.39  | 18.89  | 13.84  | 6.96   | 20.8   | 0.45  | 0.40  | 0.48  |
| Moldova                        | 23.47  | 13.9  | 33.97  | 36.57  | 22.25  | 52.05  | 0.89  | 0.99  | 0.82  |
| Mongolia                       | 8.94   | 7.28  | 10.65  | 13.89  | 11.67  | 16.15  | 1.27  | 1.74  | 0.98  |
| Montenegro                     | 126.15 | 73.64 | 179.12 | 203.48 | 116.62 | 292.41 | 0.56  | 0.58  | 0.54  |
| Morocco                        | 14.33  | 9.76  | 18.91  | 21.12  | 14.74  | 27.66  | 1.21  | 1.26  | 1.19  |
| Mozambique                     | 13.65  | 6.24  | 21.74  | 21.5   | 8.72   | 34.87  | 1.86  | 1.47  | 1.90  |
| Myanmar                        | 18.61  | 16.18 | 21.15  | 31.82  | 27.34  | 36.51  | 1.99  | 2.18  | 1.84  |

|                                  |        |        |        |        |        |        |       |       |       |
|----------------------------------|--------|--------|--------|--------|--------|--------|-------|-------|-------|
| Namibia                          | 34.95  | 21.64  | 48.83  | 26.87  | 12.07  | 42.46  | -0.11 | -0.34 | -0.02 |
| Nepal                            | 7.03   | 4.49   | 9.62   | 13.41  | 7.54   | 19.65  | 3.36  | 3.12  | 3.35  |
| Netherlands                      | 147.75 | 65.76  | 231.59 | 131.93 | 77.62  | 187.14 | -0.03 | 0.24  | -0.09 |
| New Zealand                      | 174.81 | 114.02 | 237.47 | 114.19 | 88.23  | 141.13 | -0.22 | -0.12 | -0.25 |
| Nicaragua                        | 7.02   | 3.87   | 10.22  | 10.67  | 6.03   | 15.44  | 1.71  | 1.82  | 1.66  |
| Niger                            | 10.01  | 9.13   | 10.93  | 5.11   | 2.83   | 7.36   | 0.19  | -0.28 | 0.56  |
| Nigeria                          | 17.24  | 17.15  | 17.33  | 8.16   | 4.75   | 11.43  | -0.14 | -0.49 | 0.18  |
| North Korea                      | 17.56  | 12.92  | 22.47  | 27.66  | 18.68  | 37.05  | 0.67  | 0.60  | 0.69  |
| Northern Mariana Islands         | 40.5   | 45.23  | 36.24  | 26.51  | 21.93  | 31.12  | -0.18 | -0.34 | 0.00  |
| Norway                           | 197.05 | 105.85 | 290.31 | 125.55 | 81.41  | 169.17 | -0.17 | -0.06 | -0.19 |
| Oman                             | 15.72  | 5.37   | 23.98  | 17.41  | 4.65   | 23.88  | 0.89  | 0.57  | 0.67  |
| Pakistan                         | 11.97  | 5.11   | 18.35  | 25.47  | 11.53  | 38.66  | 2.20  | 2.58  | 2.03  |
| Palestine                        | 13.94  | 10.92  | 16.88  | 20.65  | 13.23  | 27.86  | 1.25  | 0.93  | 1.41  |
| Panama                           | 32.55  | 15.19  | 49.53  | 37.54  | 18.23  | 56.74  | 0.22  | 0.29  | 0.20  |
| Papua New Guinea                 | 35.76  | 23.75  | 47.22  | 43.12  | 29.71  | 56     | 0.65  | 0.68  | 0.65  |
| Paraguay                         | 26.64  | 15.61  | 37.42  | 55.45  | 32.26  | 77.93  | 1.22  | 1.34  | 1.12  |
| Peru                             | 14.9   | 9.63   | 20.18  | 15.96  | 11.84  | 20.09  | 1.21  | 1.48  | 1.10  |
| Philippines                      | 20.76  | 13.14  | 28.23  | 24.47  | 17.27  | 31.54  | 0.63  | 0.82  | 0.54  |
| Poland                           | 90.29  | 37.41  | 145.9  | 98.04  | 46.4   | 153.62 | 0.26  | 0.41  | 0.23  |
| Portugal                         | 51.69  | 28.22  | 76.92  | 58.64  | 28.1   | 91.21  | 0.37  | 0.16  | 0.47  |
| Puerto Rico                      | 37.51  | 18.02  | 58.22  | 31.7   | 20.36  | 43.95  | -0.09 | 0.10  | -0.13 |
| Qatar                            | 11.53  | 4.29   | 15.11  | 8.53   | 3.84   | 10.28  | 0.02  | 0.22  | -0.05 |
| Romania                          | 47.54  | 34.26  | 61.19  | 69.33  | 52.71  | 87.02  | 0.53  | 0.64  | 0.46  |
| Russia                           | 17.29  | 10.44  | 25.08  | 104.91 | 57.9   | 160.11 | 4.64  | 4.38  | 4.69  |
| Rwanda                           | 25.43  | 16.02  | 35.17  | 17.36  | 11.86  | 23.34  | 0.59  | 0.73  | 0.51  |
| Saint Lucia                      | 82.71  | 70.08  | 95.72  | 107.04 | 95.5   | 119.02 | 0.53  | 0.61  | 0.47  |
| Saint Vincent and the Grenadines | 68.28  | 31.62  | 105.3  | 61.13  | 39.49  | 82.38  | -0.09 | 0.35  | -0.25 |
| Samoa                            | 40.47  | 25.35  | 54.4   | 44.82  | 39.85  | 49.49  | 0.29  | 0.61  | 0.18  |
| Sao Tome and Principe            | 20.63  | 16.68  | 24.66  | 13.7   | 8.65   | 18.78  | 0.18  | -0.10 | 0.34  |
| Saudi Arabia                     | 4.95   | 2.36   | 6.98   | 7.72   | 2.96   | 11.38  | 1.73  | 1.38  | 1.70  |
| Senegal                          | 15.14  | 12.89  | 17.42  | 9.17   | 5.39   | 13.1   | 0.18  | -0.20 | 0.43  |
| Serbia                           | 62.79  | 30.43  | 96.02  | 108.74 | 61.98  | 157.78 | 0.69  | 0.96  | 0.62  |
| Seychelles                       | 39.25  | 18.15  | 60.44  | 36.67  | 20.93  | 52     | 0.04  | 0.23  | -0.02 |
| Sierra Leone                     | 14.36  | 9.84   | 18.96  | 9.41   | 5.6    | 13.31  | 0.17  | -0.03 | 0.30  |
| Singapore                        | 46.77  | 21.82  | 71.07  | 42.33  | 24.88  | 60.4   | 0.05  | 0.27  | 0.01  |
| Slovakia                         | 42.98  | 28.02  | 58.65  | 59.61  | 34.26  | 86.35  | 0.66  | 0.38  | 0.85  |
| Slovenia                         | 56.54  | 33.22  | 81.27  | 74.35  | 41.54  | 107.75 | 0.54  | 0.40  | 0.62  |
| Solomon Islands                  | 37.35  | 21.56  | 52.3   | 47.6   | 30.79  | 63.89  | 0.66  | 0.84  | 0.61  |
| Somalia                          | 31.54  | 13.36  | 50.05  | 22.22  | 9.58   | 34.98  | 0.04  | 0.06  | 0.04  |
| South Africa                     | 44.52  | 31.08  | 58.27  | 46.92  | 25.44  | 69.17  | 0.00  | -0.22 | 0.12  |
| South Korea                      | 27.67  | 22.73  | 32.58  | 38.35  | 31.96  | 44.82  | 0.60  | 0.59  | 0.61  |
| South Sudan                      | 22.5   | 13     | 32.1   | 21.34  | 11.88  | 30.77  | 0.50  | 0.44  | 0.52  |
| Spain                            | 65.63  | 27.68  | 105.17 | 71.55  | 29.42  | 114.76 | 0.30  | 0.19  | 0.38  |
| Sri Lanka                        | 22.79  | 13.4   | 32     | 30.67  | 20.56  | 41.53  | 0.89  | 1.05  | 0.86  |
| Sudan                            | 13.94  | 7.62   | 20.21  | 16.56  | 9.13   | 23.94  | 1.31  | 1.37  | 1.25  |
| Suriname                         | 29.41  | 12.76  | 45.53  | 43.19  | 18.41  | 67.89  | 0.68  | 0.72  | 0.64  |
| Swaziland                        | 30.18  | 20.79  | 40.68  | 45.63  | 23.83  | 67.9   | 0.10  | -0.21 | 0.24  |
| Sweden                           | 199.95 | 112.36 | 289.66 | 157.41 | 104.87 | 210.04 | -0.05 | 0.07  | -0.09 |
| Switzerland                      | 107.35 | 52.19  | 165.12 | 81.38  | 46.77  | 116.76 | -0.06 | 0.05  | -0.07 |
| Syria                            | 17.29  | 9.75   | 24.58  | 18.62  | 12.47  | 24.63  | -0.10 | 0.38  | -0.30 |
| Taiwan                           | 50.41  | 18.9   | 79.66  | 59.96  | 33.32  | 86.69  | 0.18  | 0.69  | 0.09  |
| Tajikistan                       | 8.31   | 5.03   | 11.62  | 9.68   | 5.73   | 13.55  | 1.28  | 1.29  | 1.24  |
| Tanzania                         | 16.33  | 9.45   | 23.34  | 17.94  | 9.33   | 26.66  | 1.08  | 0.85  | 1.11  |
| Thailand                         | 22.05  | 11.06  | 33.24  | 48.31  | 28.41  | 68.78  | 1.12  | 1.61  | 0.93  |
| The Bahamas                      | 53.13  | 40     | 66.44  | 79.66  | 68.34  | 91.47  | 0.65  | 0.81  | 0.56  |
| The Gambia                       | 12.22  | 11.73  | 12.71  | 6.38   | 3.4    | 9.42   | -0.03 | -0.43 | 0.31  |
| Timor-Leste                      | 10.96  | 8.56   | 13.3   | 13.6   | 12.01  | 15.14  | 2.24  | 2.71  | 1.93  |
| Togo                             | 17.02  | 15.5   | 18.57  | 11.3   | 5.11   | 17.63  | 0.00  | -0.48 | 0.35  |
| Tonga                            | 21.11  | 5.07   | 36.76  | 31.94  | 6.92   | 56.84  | 0.67  | 0.58  | 0.62  |
| Trinidad and Tobago              | 70.57  | 42.25  | 99.11  | 120.65 | 76.13  | 166.36 | 0.62  | 0.81  | 0.52  |
| Tunisia                          | 13.86  | 6.52   | 21.11  | 19.37  | 9.65   | 29.31  | 0.87  | 1.08  | 0.78  |

|                                        |        |        |        |        |        |        |       |       |       |
|----------------------------------------|--------|--------|--------|--------|--------|--------|-------|-------|-------|
| Turkey                                 | 50.07  | 19.3   | 81.59  | 43.15  | 21.19  | 65.88  | 0.64  | 1.07  | 0.55  |
| Turkmenistan                           | 11.7   | 6.76   | 16.77  | 25.85  | 13.74  | 38.37  | 2.70  | 2.61  | 2.65  |
| Uganda                                 | 19.21  | 12.46  | 26.06  | 23.19  | 11.43  | 34.95  | 1.44  | 0.89  | 1.62  |
| Ukraine                                | 40.54  | 23.93  | 59.87  | 70.37  | 40.52  | 105.64 | 0.61  | 0.63  | 0.57  |
| United Arab Emirates                   | 26.65  | 8.85   | 35.9   | 45.64  | 14.1   | 57.13  | 1.15  | 1.28  | 0.94  |
| United Kingdom                         | 231.15 | 137.95 | 329.74 | 152.65 | 104.03 | 202.49 | -0.18 | -0.10 | -0.22 |
| United States                          | 103.14 | 58.77  | 149.8  | 64.01  | 42.09  | 86.66  | -0.33 | -0.26 | -0.35 |
| Uruguay                                | 147.06 | 89.81  | 207.83 | 146.33 | 96.94  | 199.23 | 0.12  | 0.16  | 0.11  |
| Uzbekistan                             | 5.61   | 3.31   | 7.95   | 8.48   | 4.67   | 12.41  | 1.03  | 0.97  | 1.02  |
| Vanuatu                                | 45.74  | 23.5   | 66.77  | 56.12  | 35.71  | 76.02  | 0.40  | 0.69  | 0.32  |
| Venezuela                              | 26.17  | 13.39  | 38.74  | 33.54  | 18.35  | 48.87  | 0.24  | 0.46  | 0.13  |
| Vietnam                                | 14.73  | 10.08  | 19.53  | 28.21  | 19.31  | 37.31  | 1.78  | 1.94  | 1.64  |
| Virgin Islands, U.S.                   | 51.96  | 28.53  | 76.78  | 85.45  | 49.05  | 125.46 | 0.23  | 0.34  | 0.18  |
| Yemen                                  | 10.83  | 5.9    | 15.85  | 16.32  | 8.83   | 23.66  | 2.18  | 2.21  | 2.11  |
| Zambia                                 | 15.24  | 12     | 18.54  | 30.04  | 12.77  | 47.35  | 2.30  | 0.85  | 3.07  |
| Zimbabwe                               | 9.91   | 6.39   | 13.45  | 17.69  | 7.32   | 28.36  | 0.56  | -0.02 | 0.84  |
| <b>Atrial fibrillation and flutter</b> |        |        |        |        |        |        |       |       |       |
| Afghanistan                            | 13.76  | 13.65  | 13.87  | 17.27  | 17.57  | 16.98  | 1.06  | 1.21  | 0.94  |
| Albania                                | 59.79  | 55.06  | 64.31  | 117.86 | 107.96 | 127.93 | 1.21  | 1.26  | 1.17  |
| Algeria                                | 17.76  | 17.03  | 18.47  | 33.48  | 30.23  | 36.69  | 1.69  | 1.51  | 1.86  |
| American Samoa                         | 23.59  | 20.42  | 26.59  | 22.21  | 21.61  | 22.81  | 0.15  | 0.12  | 0.16  |
| Andorra                                | 130.11 | 125.37 | 135.11 | 176.03 | 161.65 | 191.02 | 0.36  | 0.32  | 0.40  |
| Angola                                 | 9.38   | 7.91   | 10.89  | 9.14   | 7.51   | 10.79  | 1.03  | 0.90  | 1.14  |
| Antigua and Barbuda                    | 36.55  | 33.4   | 39.91  | 37.23  | 32.26  | 42.66  | 0.13  | 0.05  | 0.20  |
| Argentina                              | 69.52  | 55.31  | 84.29  | 81.56  | 69.5   | 94.14  | 0.39  | 0.43  | 0.37  |
| Armenia                                | 59.45  | 58.9   | 60.02  | 106.02 | 105.08 | 107.11 | 0.99  | 1.01  | 0.96  |
| Australia                              | 77.25  | 64.31  | 90.25  | 96.31  | 74.96  | 117.72 | 0.45  | 0.29  | 0.58  |
| Austria                                | 150.33 | 166.63 | 132.57 | 261.05 | 257.9  | 264.36 | 1.06  | 0.81  | 1.41  |
| Azerbaijan                             | 42     | 42.36  | 41.62  | 62.62  | 57.83  | 67.47  | 1.24  | 1.08  | 1.42  |
| Bahrain                                | 13.36  | 11.34  | 14.85  | 15.62  | 14.52  | 16.3   | 0.69  | 0.79  | 0.63  |
| Bangladesh                             | 16.35  | 12.16  | 20.36  | 25.52  | 18.32  | 32.58  | 2.62  | 2.78  | 2.47  |
| Barbados                               | 46.14  | 42.83  | 49.71  | 68.22  | 60.44  | 76.68  | 0.40  | 0.30  | 0.50  |
| Belarus                                | 92.8   | 103.13 | 81.1   | 124.5  | 137.36 | 109.58 | 0.16  | 0.25  | 0.09  |
| Belgium                                | 106.94 | 112.94 | 100.66 | 137.91 | 139.03 | 136.74 | 0.47  | 0.38  | 0.58  |
| Belize                                 | 23.49  | 18.76  | 28.14  | 21.67  | 15.96  | 27.41  | 0.10  | 0.07  | 0.11  |
| Benin                                  | 11.09  | 9.81   | 12.45  | 10.02  | 8.44   | 11.6   | 0.75  | 0.68  | 0.81  |
| Bermuda                                | 30.15  | 23.99  | 36.38  | 41.29  | 33.05  | 49.69  | 0.74  | 0.65  | 0.80  |
| Bhutan                                 | 17.83  | 12.99  | 22.32  | 27.73  | 18.55  | 35.64  | 2.49  | 2.47  | 2.33  |
| Bolivia                                | 20.84  | 17.38  | 24.28  | 34.48  | 28.52  | 40.42  | 2.57  | 2.55  | 2.58  |
| Bosnia and Herzegovina                 | 83.72  | 83.42  | 84.03  | 146.15 | 141.7  | 150.63 | 0.77  | 0.66  | 0.87  |
| Botswana                               | 8.66   | 7.72   | 9.63   | 12.27  | 10.22  | 14.33  | 0.15  | 0.10  | 0.19  |
| Brazil                                 | 18.82  | 16.4   | 21.28  | 38.52  | 33.54  | 43.67  | 1.58  | 1.56  | 1.59  |
| Brunei                                 | 13.57  | 5.77   | 20.56  | 22.96  | 10.08  | 35.08  | 0.72  | 0.77  | 0.74  |
| Bulgaria                               | 127.68 | 119.53 | 136.05 | 180.37 | 183.03 | 177.58 | 0.38  | 0.46  | 0.29  |
| Burkina Faso                           | 11.6   | 10.06  | 13.21  | 9.96   | 9.23   | 10.71  | 0.61  | 0.69  | 0.54  |
| Burundi                                | 11.85  | 9.92   | 13.85  | 10.66  | 8.22   | 13.16  | 1.02  | 0.89  | 1.11  |
| Cambodia                               | 21.9   | 21.73  | 22.08  | 30.59  | 29.84  | 31.37  | 2.41  | 2.45  | 2.39  |
| Cameroon                               | 12.63  | 10.26  | 15.03  | 11.34  | 9      | 13.67  | 0.21  | 0.19  | 0.21  |
| Canada                                 | 90.54  | 65.37  | 116.15 | 123.83 | 84.22  | 164    | 0.43  | 0.28  | 0.54  |
| Cape Verde                             | 15.44  | 12.86  | 18.29  | 17.5   | 14.97  | 20.1   | 0.75  | 0.82  | 0.69  |
| Central African Republic               | 15.92  | 13.56  | 18.37  | 16.33  | 14.02  | 18.7   | 0.27  | 0.27  | 0.28  |
| Chad                                   | 11.07  | 9.38   | 12.79  | 8.6    | 7.12   | 10.08  | 0.14  | 0.12  | 0.16  |
| Chile                                  | 58.72  | 45.74  | 72.05  | 91.96  | 74.82  | 109.56 | 0.80  | 0.76  | 0.84  |
| China                                  | 31.75  | 30.42  | 33.01  | 58.6   | 53.07  | 63.82  | 1.74  | 1.83  | 1.68  |
| Colombia                               | 19.74  | 16.6   | 22.93  | 33.25  | 27.76  | 38.9   | 1.25  | 1.07  | 1.39  |
| Comoros                                | 11.81  | 9.67   | 13.93  | 11.58  | 9.03   | 14.07  | 1.12  | 1.03  | 1.19  |
| Congo                                  | 13.92  | 11.41  | 16.44  | 14.42  | 11.74  | 17.09  | 0.48  | 0.31  | 0.67  |
| Costa Rica                             | 23.87  | 19.29  | 28.38  | 41.92  | 33.81  | 50.03  | 0.84  | 0.82  | 0.86  |
| Cote d'Ivoire                          | 10.26  | 7.18   | 13.1   | 10.53  | 7      | 13.94  | 0.46  | 0.42  | 0.49  |
| Croatia                                | 87.23  | 88.79  | 85.57  | 110.93 | 109.34 | 112.63 | 0.37  | 0.27  | 0.47  |
| Cuba                                   | 43.29  | 34.01  | 52.44  | 69.82  | 57.24  | 82.28  | 0.55  | 0.61  | 0.51  |

|                                  |        |        |        |        |        |        |       |       |       |
|----------------------------------|--------|--------|--------|--------|--------|--------|-------|-------|-------|
| Cyprus                           | 98.92  | 92.53  | 105.47 | 106.1  | 99.69  | 112.94 | 0.25  | 0.27  | 0.23  |
| Czech Republic                   | 150.9  | 158.7  | 142.62 | 227.1  | 220.95 | 233.44 | 0.87  | 0.67  | 1.09  |
| Democratic Republic of the Congo | 10.98  | 9.82   | 12.16  | 12.86  | 10.93  | 14.8   | 0.91  | 0.81  | 0.99  |
| Denmark                          | 101.79 | 100.8  | 102.81 | 141.86 | 130.9  | 153.01 | 0.72  | 0.57  | 0.88  |
| Djibouti                         | 10.52  | 8.35   | 12.65  | 15.52  | 11.73  | 19.28  | 1.07  | 1.02  | 1.12  |
| Dominica                         | 33.88  | 27.35  | 40.45  | 47.97  | 39.53  | 56.54  | 0.28  | 0.43  | 0.17  |
| Dominican Republic               | 20.31  | 14.85  | 25.7   | 34.3   | 26.64  | 42.01  | 1.27  | 1.46  | 1.16  |
| Ecuador                          | 20.69  | 16.53  | 24.81  | 33.05  | 26.6   | 39.5   | 1.23  | 1.29  | 1.19  |
| Egypt                            | 24.93  | 25.75  | 24.11  | 27.29  | 27.18  | 27.39  | 0.89  | 0.90  | 0.89  |
| El Salvador                      | 22.4   | 18.18  | 26.82  | 40.57  | 32.69  | 49.48  | 1.69  | 1.66  | 1.72  |
| Equatorial Guinea                | 18.48  | 15.76  | 21.07  | 12.37  | 8.82   | 15.74  | 0.33  | 0.11  | 0.48  |
| Eritrea                          | 7.56   | 6.82   | 8.32   | 9.99   | 9.02   | 10.96  | 1.37  | 1.32  | 1.42  |
| Estonia                          | 99.62  | 112.22 | 85.29  | 143.86 | 160.75 | 124.03 | 0.84  | 0.71  | 0.96  |
| Ethiopia                         | 12.43  | 9.03   | 15.86  | 12.73  | 9.65   | 15.83  | 2.24  | 2.34  | 2.19  |
| Federated States of Micronesia   | 26.52  | 23.43  | 29.47  | 33.69  | 31.02  | 36.23  | 0.72  | 0.78  | 0.67  |
| Fiji                             | 20.68  | 17.43  | 23.83  | 36.98  | 33.13  | 40.69  | 0.56  | 0.59  | 0.54  |
| Finland                          | 176.42 | 191.48 | 160.46 | 274.37 | 282.3  | 266.2  | 0.78  | 0.64  | 0.95  |
| France                           | 143.85 | 148.2  | 139.26 | 187.21 | 186.3  | 188.19 | 0.45  | 0.35  | 0.54  |
| Gabon                            | 20.06  | 16.69  | 23.57  | 18.59  | 15.24  | 21.88  | 0.40  | 0.35  | 0.45  |
| Georgia                          | 82.52  | 86.65  | 77.95  | 129.57 | 135.27 | 123.33 | 0.59  | 0.68  | 0.52  |
| Germany                          | 160.1  | 174.97 | 144.13 | 218.91 | 214.12 | 223.87 | 0.54  | 0.38  | 0.75  |
| Ghana                            | 9.45   | 7.98   | 10.88  | 12.08  | 10.71  | 13.47  | 1.18  | 1.40  | 1.03  |
| Greece                           | 122.48 | 112.47 | 132.75 | 191.11 | 186.32 | 196.14 | 0.58  | 0.66  | 0.50  |
| Greenland                        | 33.84  | 22.46  | 43.69  | 62.51  | 34.2   | 87.05  | 1.57  | 1.17  | 1.74  |
| Grenada                          | 36.25  | 33.43  | 39.14  | 38.54  | 36.26  | 40.8   | 0.16  | 0.21  | 0.12  |
| Guam                             | 26.79  | 24.14  | 29.1   | 51.12  | 45.66  | 56.42  | 0.42  | 0.39  | 0.43  |
| Guatemala                        | 16.68  | 12.8   | 20.62  | 24.55  | 20.31  | 28.97  | 1.70  | 2.01  | 1.50  |
| Guinea                           | 11.43  | 9.37   | 13.53  | 10.95  | 8.67   | 13.21  | 0.81  | 0.79  | 0.81  |
| Guinea-Bissau                    | 12.53  | 10.37  | 14.74  | 11.06  | 8.72   | 13.44  | 0.36  | 0.29  | 0.41  |
| Guyana                           | 23.12  | 18.61  | 27.78  | 25.93  | 20.68  | 31.14  | 0.27  | 0.29  | 0.26  |
| Haiti                            | 21.58  | 18.36  | 24.9   | 26.75  | 23.3   | 30.28  | 1.39  | 1.40  | 1.38  |
| Honduras                         | 17.57  | 14.18  | 20.93  | 28.59  | 22.97  | 34.21  | 1.56  | 1.46  | 1.64  |
| Hungary                          | 115.25 | 119.92 | 110.19 | 143.93 | 154.45 | 132.34 | 0.60  | 0.53  | 0.63  |
| Iceland                          | 164.32 | 137.43 | 190.98 | 201.11 | 162.85 | 240.19 | 0.42  | 0.40  | 0.44  |
| India                            | 21.34  | 16.75  | 25.61  | 32.48  | 25.56  | 38.91  | 1.61  | 1.86  | 1.41  |
| Indonesia                        | 24.05  | 21.24  | 26.83  | 34.08  | 30.24  | 37.86  | 1.19  | 1.29  | 1.12  |
| Iran                             | 16.46  | 13.61  | 19.2   | 28.84  | 23.11  | 34.49  | 2.34  | 2.45  | 2.27  |
| Iraq                             | 20.16  | 19.57  | 20.74  | 17.11  | 16.85  | 17.37  | 0.05  | 0.16  | -0.02 |
| Ireland                          | 106.19 | 95.02  | 117.46 | 109.65 | 90.91  | 128.96 | 0.27  | 0.18  | 0.34  |
| Israel                           | 90.97  | 82.77  | 99.19  | 114.53 | 109.56 | 119.59 | 0.52  | 0.58  | 0.47  |
| Italy                            | 132.4  | 130.67 | 134.23 | 193.81 | 187.55 | 200.46 | 0.60  | 0.49  | 0.73  |
| Jamaica                          | 38.26  | 32.33  | 44.33  | 52.23  | 43.15  | 61.39  | 0.30  | 0.32  | 0.27  |
| Japan                            | 49.7   | 31.38  | 68.69  | 103.21 | 69.34  | 138.89 | 0.84  | 0.99  | 0.77  |
| Jordan                           | 19.48  | 17.31  | 21.44  | 19.89  | 17.77  | 21.91  | 0.54  | 0.60  | 0.49  |
| Kazakhstan                       | 54.25  | 60.26  | 47.86  | 63.48  | 65.6   | 61.21  | 0.27  | 0.24  | 0.34  |
| Kenya                            | 9.55   | 7.23   | 11.87  | 10.79  | 8.35   | 13.24  | 0.57  | 0.63  | 0.52  |
| Kiribati                         | 28.28  | 28.73  | 27.82  | 32.23  | 33.17  | 31.27  | 0.61  | 0.78  | 0.49  |
| Kuwait                           | 10.09  | 7.13   | 12.69  | 12.5   | 9.36   | 14.95  | 0.53  | 0.53  | 0.53  |
| Kyrgyzstan                       | 48.73  | 52.49  | 44.8   | 52.02  | 50.63  | 53.45  | 0.51  | 0.44  | 0.62  |
| Laos                             | 24.88  | 23.74  | 26.03  | 26.19  | 23.94  | 28.46  | 1.92  | 1.91  | 1.92  |
| Latvia                           | 102.36 | 114.42 | 88.47  | 139.35 | 156.32 | 119.59 | 0.58  | 0.54  | 0.61  |
| Lebanon                          | 31.32  | 29.32  | 33.38  | 39.53  | 36.84  | 42.2   | 1.20  | 0.95  | 1.44  |
| Lesotho                          | 13.84  | 11.98  | 15.81  | 14.33  | 13.7   | 14.97  | -0.34 | -0.30 | -0.38 |
| Liberia                          | 9.79   | 7.48   | 12.11  | 10.41  | 8.17   | 12.63  | 1.76  | 1.68  | 1.85  |
| Libya                            | 14.84  | 13.48  | 16.06  | 24.74  | 23.17  | 26.28  | 0.77  | 1.01  | 0.60  |
| Lithuania                        | 92.42  | 98.26  | 85.92  | 136.04 | 149.42 | 120.47 | 0.48  | 0.54  | 0.39  |
| Luxembourg                       | 140.11 | 151.49 | 128.26 | 150.2  | 154.9  | 145.48 | 0.53  | 0.37  | 0.71  |
| Macedonia                        | 83.1   | 75.75  | 90.37  | 128.48 | 124.65 | 132.35 | 0.67  | 0.78  | 0.58  |
| Madagascar                       | 13.81  | 9.89   | 17.74  | 14.2   | 10.91  | 17.51  | 0.94  | 1.13  | 0.82  |
| Malawi                           | 9.4    | 7.54   | 11.33  | 11.07  | 8.99   | 13.16  | 1.56  | 1.66  | 1.47  |
| Malaysia                         | 24.41  | 20.36  | 28.33  | 34.89  | 26.98  | 42.96  | 0.51  | 0.51  | 0.51  |



|                                  |        |        |        |        |        |        |       |       |       |
|----------------------------------|--------|--------|--------|--------|--------|--------|-------|-------|-------|
| Maldives                         | 21.45  | 14.13  | 28.4   | 32.27  | 24.11  | 40.39  | 3.03  | 3.79  | 2.65  |
| Mali                             | 12.33  | 10.13  | 14.57  | 8.9    | 7.47   | 10.29  | 0.28  | 0.30  | 0.27  |
| Malta                            | 92.37  | 90.8   | 94     | 141.59 | 146.23 | 136.92 | 0.54  | 0.61  | 0.46  |
| Marshall Islands                 | 20.63  | 18.35  | 22.81  | 27.4   | 24.39  | 30.31  | 0.60  | 0.57  | 0.62  |
| Mauritania                       | 10.19  | 8.58   | 11.81  | 10.69  | 8.97   | 12.39  | 0.93  | 0.88  | 0.98  |
| Mauritius                        | 29.09  | 28.79  | 29.4   | 56.38  | 52.44  | 60.42  | 0.90  | 0.74  | 1.04  |
| Mexico                           | 20.86  | 17.36  | 24.4   | 33.63  | 27.86  | 39.45  | 1.12  | 1.06  | 1.17  |
| Moldova                          | 73.52  | 75.25  | 71.62  | 103.92 | 106.29 | 101.37 | 0.72  | 0.76  | 0.68  |
| Mongolia                         | 40.85  | 37.53  | 44.24  | 44.43  | 40.96  | 47.98  | 0.59  | 0.86  | 0.41  |
| Montenegro                       | 124.01 | 126.65 | 121.36 | 197.75 | 192.11 | 203.53 | 0.54  | 0.51  | 0.58  |
| Morocco                          | 21.23  | 20.84  | 21.61  | 35.62  | 33.51  | 37.78  | 1.53  | 1.41  | 1.64  |
| Mozambique                       | 11.32  | 9.26   | 13.57  | 11.93  | 9.75   | 14.22  | 0.94  | 0.92  | 0.95  |
| Myanmar                          | 34.93  | 39.26  | 30.42  | 43.96  | 46.38  | 41.43  | 1.22  | 1.23  | 1.26  |
| Namibia                          | 11.02  | 9.45   | 12.65  | 12.02  | 10.22  | 13.92  | 0.29  | 0.31  | 0.27  |
| Nepal                            | 18.09  | 15.46  | 20.75  | 26.99  | 19.77  | 34.67  | 2.41  | 2.14  | 2.56  |
| Netherlands                      | 182.33 | 184.55 | 180.05 | 241.43 | 224.34 | 258.8  | 0.44  | 0.28  | 0.61  |
| New Zealand                      | 156.65 | 156.92 | 156.36 | 199.38 | 186.68 | 212.57 | 0.52  | 0.34  | 0.71  |
| Nicaragua                        | 15.37  | 12.91  | 17.87  | 28.64  | 23.81  | 33.61  | 2.32  | 2.33  | 2.31  |
| Niger                            | 7.94   | 6.44   | 9.49   | 8.76   | 6.74   | 10.75  | 1.58  | 1.45  | 1.66  |
| Nigeria                          | 9.84   | 7.79   | 11.85  | 8.83   | 6.64   | 10.93  | 0.63  | 0.58  | 0.65  |
| North Korea                      | 31.1   | 35.83  | 26.08  | 64.66  | 73.61  | 55.3   | 1.20  | 1.26  | 1.17  |
| Northern Mariana Islands         | 15.84  | 12.96  | 18.44  | 15.42  | 10.98  | 19.89  | 0.22  | 0.15  | 0.26  |
| Norway                           | 217.39 | 204.61 | 230.46 | 260.3  | 223.36 | 296.8  | 0.56  | 0.33  | 0.79  |
| Oman                             | 12.96  | 13.61  | 12.43  | 15.48  | 15.28  | 15.58  | 1.03  | 1.02  | 1.08  |
| Pakistan                         | 24.6   | 14.53  | 33.95  | 26.25  | 16.93  | 35.07  | 0.61  | 0.85  | 0.49  |
| Palestine                        | 12.72  | 12.29  | 13.15  | 17.03  | 16.07  | 17.96  | 1.03  | 1.08  | 1.00  |
| Panama                           | 23.92  | 18.68  | 29.04  | 36.53  | 28.76  | 44.27  | 0.62  | 0.65  | 0.60  |
| Papua New Guinea                 | 17.37  | 16.76  | 17.95  | 20.87  | 19.66  | 22.03  | 0.66  | 0.59  | 0.72  |
| Paraguay                         | 19.35  | 16.09  | 22.53  | 30.48  | 24.44  | 36.34  | 0.68  | 0.72  | 0.65  |
| Peru                             | 19.04  | 15.6   | 22.47  | 32.05  | 26.95  | 37.15  | 2.46  | 2.47  | 2.47  |
| Philippines                      | 20.68  | 18.82  | 22.5   | 30.17  | 27.98  | 32.32  | 1.01  | 1.05  | 0.98  |
| Poland                           | 125.72 | 133.49 | 117.54 | 202.91 | 213.61 | 191.4  | 0.86  | 0.82  | 0.90  |
| Portugal                         | 139.25 | 136.5  | 142.21 | 189.42 | 185.21 | 193.9  | 0.64  | 0.58  | 0.69  |
| Puerto Rico                      | 44.18  | 34.95  | 54     | 64.43  | 57.25  | 72.19  | 0.57  | 0.60  | 0.54  |
| Qatar                            | 11.07  | 8.78   | 12.21  | 10.18  | 8.09   | 10.96  | 0.27  | 0.25  | 0.25  |
| Romania                          | 76.67  | 78.61  | 74.67  | 104.91 | 112.64 | 96.69  | 0.43  | 0.53  | 0.33  |
| Russia                           | 85.71  | 99.08  | 70.54  | 118.56 | 129.46 | 105.75 | 0.29  | 0.27  | 0.34  |
| Rwanda                           | 9.51   | 7.99   | 11.09  | 11.15  | 9.5    | 12.93  | 1.77  | 1.84  | 1.71  |
| Saint Lucia                      | 34.48  | 28.95  | 40.18  | 49.59  | 42.52  | 56.94  | 0.70  | 0.73  | 0.68  |
| Saint Vincent and the Grenadines | 31.45  | 28.43  | 34.5   | 40.17  | 33.81  | 46.42  | 0.29  | 0.28  | 0.29  |
| Samoa                            | 25.66  | 23.87  | 27.3   | 36.97  | 35.73  | 38.13  | 0.68  | 0.53  | 0.81  |
| Sao Tome and Principe            | 15.39  | 12.51  | 18.32  | 12.78  | 10.34  | 15.25  | 0.50  | 0.48  | 0.52  |
| Saudi Arabia                     | 14.18  | 13.47  | 14.73  | 18.82  | 16.17  | 20.85  | 1.32  | 1.27  | 1.34  |
| Senegal                          | 10.05  | 8.18   | 11.95  | 10.21  | 8.68   | 11.81  | 1.01  | 1.11  | 0.96  |
| Serbia                           | 76.09  | 76.56  | 75.6   | 105.71 | 110.12 | 101.09 | 0.36  | 0.39  | 0.32  |
| Seychelles                       | 42.81  | 41.96  | 43.66  | 46.68  | 44.66  | 48.65  | 0.21  | 0.14  | 0.27  |
| Sierra Leone                     | 10.27  | 7.3    | 13.3   | 8.91   | 6.65   | 11.22  | 0.56  | 0.57  | 0.57  |
| Singapore                        | 28.44  | 12.78  | 43.69  | 51.87  | 24.14  | 80.58  | 1.10  | 1.10  | 1.19  |
| Slovakia                         | 128.15 | 133.45 | 122.59 | 205.88 | 219.49 | 191.53 | 0.92  | 0.85  | 0.96  |
| Slovenia                         | 103.46 | 109.27 | 97.31  | 168.87 | 168.11 | 169.65 | 0.91  | 0.73  | 1.13  |
| Solomon Islands                  | 22.37  | 16.97  | 27.47  | 26.37  | 21.38  | 31.21  | 0.54  | 0.63  | 0.50  |
| Somalia                          | 12.36  | 9.82   | 14.94  | 10.73  | 8.42   | 13.07  | 0.31  | 0.29  | 0.32  |
| South Africa                     | 15.62  | 14.04  | 17.23  | 20.25  | 19.09  | 21.45  | 0.23  | 0.29  | 0.18  |
| South Korea                      | 23.87  | 16.14  | 31.56  | 57.74  | 37.15  | 78.58  | 1.79  | 1.59  | 1.91  |
| South Sudan                      | 9.98   | 7.81   | 12.17  | 11.67  | 9.07   | 14.27  | 0.93  | 0.92  | 0.93  |
| Spain                            | 151.19 | 154.53 | 147.71 | 203.52 | 204.15 | 202.88 | 0.61  | 0.48  | 0.73  |
| Sri Lanka                        | 38.66  | 31.17  | 46     | 54.67  | 48.79  | 60.99  | 0.99  | 1.10  | 0.91  |
| Sudan                            | 19.54  | 18.74  | 20.33  | 20.84  | 19.81  | 21.86  | 1.08  | 1.10  | 1.06  |
| Suriname                         | 24.23  | 20.4   | 27.93  | 34.82  | 30.54  | 39.07  | 0.64  | 0.78  | 0.54  |
| Swaziland                        | 9.17   | 7.62   | 10.89  | 11.51  | 9.93   | 13.12  | -0.07 | -0.06 | -0.07 |
| Sweden                           | 222.32 | 190.45 | 254.96 | 308.36 | 269.36 | 347.45 | 0.66  | 0.62  | 0.71  |

|                                       |        |        |        |          |        |          |       |       |       |
|---------------------------------------|--------|--------|--------|----------|--------|----------|-------|-------|-------|
| Switzerland                           | 92.43  | 93.07  | 91.77  | 102.2    | 98.92  | 105.55   | 0.37  | 0.24  | 0.51  |
| Syria                                 | 24.74  | 23.42  | 26.02  | 30.94    | 30.37  | 31.49    | 0.04  | 0.40  | -0.16 |
| Taiwan                                | 42.97  | 36.73  | 48.76  | 78.3     | 67.33  | 89.31    | 0.80  | 0.76  | 0.84  |
| Tajikistan                            | 38.2   | 37.09  | 39.33  | 37.75    | 31.13  | 44.21    | 0.93  | 0.68  | 1.16  |
| Tanzania                              | 9.89   | 7.81   | 12.01  | 11.2     | 8.02   | 14.42    | 1.18  | 1.01  | 1.29  |
| Thailand                              | 33.91  | 30.81  | 37.07  | 67.15    | 58.77  | 75.78    | 0.92  | 0.94  | 0.92  |
| The Bahamas                           | 20     | 17.9   | 22.12  | 38.73    | 34.79  | 42.84    | 1.13  | 1.06  | 1.20  |
| The Gambia                            | 9.17   | 6.49   | 11.82  | 8.63     | 6.22   | 11.09    | 0.75  | 0.88  | 0.65  |
| Timor-Leste                           | 15.14  | 13.89  | 16.36  | 27.52    | 25.08  | 29.87    | 3.74  | 3.78  | 3.69  |
| Togo                                  | 10.5   | 8.78   | 12.27  | 9.82     | 7.87   | 11.81    | 0.42  | 0.45  | 0.39  |
| Tonga                                 | 31.24  | 29.14  | 33.28  | 43.42    | 43.6   | 43.25    | 0.53  | 0.74  | 0.37  |
| Trinidad and Tobago                   | 26.51  | 22.86  | 30.19  | 40.59    | 35.64  | 45.67    | 0.45  | 0.56  | 0.37  |
| Tunisia                               | 27.41  | 25.08  | 29.71  | 42.79    | 39.9   | 45.75    | 1.10  | 1.23  | 0.99  |
| Turkey                                | 32.74  | 32.3   | 33.19  | 38.97    | 38.13  | 39.84    | 1.26  | 1.21  | 1.30  |
| Turkmenistan                          | 36.77  | 37.68  | 35.84  | 44.76    | 42.13  | 47.47    | 1.03  | 0.98  | 1.11  |
| Uganda                                | 10.72  | 8.45   | 13.02  | 9.97     | 7.82   | 12.13    | 0.91  | 0.95  | 0.86  |
| Ukraine                               | 101.67 | 113.75 | 87.61  | 143.06   | 156.55 | 127.14   | 0.30  | 0.33  | 0.30  |
| United Arab Emirates                  | 9.01   | 7.25   | 9.92   | 12.66    | 7.84   | 14.41    | 0.76  | 0.54  | 0.77  |
| United Kingdom                        | 134.88 | 135.46 | 134.26 | 185.09   | 182.38 | 187.86   | 0.69  | 0.61  | 0.78  |
| United States                         | 157.63 | 155.29 | 160.08 | 202.86   | 192.03 | 214.05   | 0.38  | 0.27  | 0.50  |
| Uruguay                               | 90.4   | 73.71  | 108.12 | 110.63   | 100.24 | 121.76   | 0.37  | 0.46  | 0.30  |
| Uzbekistan                            | 39.99  | 40.95  | 39     | 49.55    | 46.76  | 52.44    | 0.66  | 0.59  | 0.74  |
| Vanuatu                               | 28.09  | 20.59  | 35.18  | 30.14    | 25.09  | 35.07    | 0.23  | 0.36  | 0.16  |
| Venezuela                             | 17.33  | 14.26  | 20.35  | 29.06    | 24.69  | 33.46    | 0.63  | 0.85  | 0.48  |
| Vietnam                               | 38.89  | 40.27  | 37.47  | 53.51    | 54.86  | 52.13    | 1.00  | 1.10  | 0.94  |
| Virgin Islands, U.S.                  | 26.18  | 21.83  | 30.8   | 71.39    | 58.96  | 85.04    | 1.04  | 1.11  | 0.99  |
| Yemen                                 | 15.87  | 16.7   | 15.02  | 17.84    | 16.98  | 18.68    | 1.39  | 1.19  | 1.60  |
| Zambia                                | 9.46   | 7.72   | 11.23  | 9.97     | 8.14   | 11.8     | 0.78  | 0.87  | 0.70  |
| Zimbabwe                              | 11.29  | 9.27   | 13.32  | 13.01    | 10.52  | 15.58    | 0.02  | -0.01 | 0.03  |
| <b>Cardiomyopathy and myocarditis</b> |        |        |        |          |        |          |       |       |       |
| Afghanistan                           | 165.3  | 203.56 | 128.88 | 162.05   | 195.83 | 130.33   | 0.61  | 0.65  | 0.60  |
| Albania                               | 266.93 | 256.43 | 276.93 | 368.03   | 304.22 | 432.86   | 0.55  | 0.37  | 0.71  |
| Algeria                               | 486.79 | 473.23 | 500.02 | 248.72   | 221.92 | 275.15   | -0.27 | -0.34 | -0.21 |
| American Samoa                        | 187.27 | 175.83 | 198.1  | 197.2    | 168.46 | 225.79   | 0.28  | 0.01  | 0.53  |
| Andorra                               | 94.52  | 69.45  | 120.95 | 76.62    | 48.14  | 106.31   | -0.19 | -0.29 | -0.13 |
| Angola                                | 230.03 | 238.94 | 220.91 | 164.26   | 163.52 | 165      | 0.45  | 0.33  | 0.58  |
| Antigua and Barbuda                   | 173.25 | 173.36 | 173.14 | 163.25   | 128.11 | 201.57   | 0.04  | -0.19 | 0.30  |
| Argentina                             | 573.4  | 421.3  | 731.49 | 171.58   | 118.89 | 226.56   | -0.64 | -0.68 | -0.62 |
| Armenia                               | 45.98  | 32.34  | 60.44  | 58.89    | 35.76  | 85.52    | 0.43  | 0.25  | 0.55  |
| Australia                             | 183.36 | 119.74 | 247.32 | 99.88    | 61.53  | 138.32   | -0.37 | -0.43 | -0.32 |
| Austria                               | 586.67 | 652.35 | 515.11 | 196.01   | 178.75 | 214.14   | -0.60 | -0.68 | -0.50 |
| Azerbaijan                            | 116.51 | 75.53  | 159.27 | 115.06   | 54.8   | 176.03   | 0.49  | 0.11  | 0.65  |
| Bahrain                               | 144.42 | 126.27 | 157.77 | 73.37    | 57.9   | 82.84    | -0.26 | -0.36 | -0.22 |
| Bangladesh                            | 20.33  | 19.95  | 20.69  | 28.16    | 28.52  | 27.81    | 2.22  | 2.59  | 1.91  |
| Barbados                              | 226.14 | 198.28 | 256.16 | 230.5    | 155.88 | 311.58   | -0.03 | -0.28 | 0.19  |
| Belarus                               | 307.51 | 153.21 | 482.27 | 608.36   | 232.41 | 1,044.48 | 0.70  | 0.42  | 0.74  |
| Belgium                               | 199.16 | 189.68 | 209.09 | 121.83   | 109.33 | 134.82   | -0.30 | -0.36 | -0.25 |
| Belize                                | 196.8  | 230.42 | 163.74 | 169.44   | 152.48 | 186.49   | 0.03  | -0.17 | 0.30  |
| Benin                                 | 72.04  | 65.98  | 78.49  | 57.12    | 40     | 74.3     | 0.51  | 0.16  | 0.78  |
| Bermuda                               | 213.46 | 163.94 | 263.61 | 139.2    | 76.57  | 203.03   | -0.17 | -0.44 | 0.02  |
| Bhutan                                | 28.22  | 28.77  | 27.72  | 39.38    | 38.16  | 40.42    | 2.13  | 2.23  | 2.04  |
| Bolivia                               | 250.1  | 239.62 | 260.52 | 101.77   | 95.08  | 108.44   | -0.12 | -0.14 | -0.11 |
| Bosnia and Herzegovina                | 456.1  | 462.35 | 449.84 | 1,012.30 | 996.42 | 1,028.32 | 1.26  | 1.11  | 1.39  |
| Botswana                              | 199.95 | 205.51 | 194.26 | 276.36   | 250.59 | 302.15   | 0.04  | -0.08 | 0.16  |
| Brazil                                | 233.07 | 192.19 | 274.6  | 224.7    | 160.31 | 291.25   | 0.21  | 0.05  | 0.34  |
| Brunei                                | 130.19 | 90.4   | 165.81 | 115.69   | 69.46  | 159.2    | -0.09 | -0.22 | -0.02 |
| Bulgaria                              | 223.54 | 196.27 | 251.58 | 516.06   | 468.11 | 566.37   | 1.25  | 1.28  | 1.23  |
| Burkina Faso                          | 79.34  | 74.83  | 84.07  | 63.03    | 51.43  | 74.79    | 0.48  | 0.25  | 0.67  |
| Burundi                               | 150.8  | 128.15 | 174.24 | 66.62    | 56.57  | 76.89    | -0.01 | 0.00  | -0.03 |
| Cambodia                              | 211.39 | 212.77 | 209.92 | 98.73    | 83.68  | 114.54   | 0.14  | -0.01 | 0.30  |
| Cameroon                              | 85.78  | 77.32  | 94.35  | 71.94    | 51.65  | 92.22    | 0.12  | -0.11 | 0.28  |

|                                  |        |        |        |        |        |        |       |       |       |
|----------------------------------|--------|--------|--------|--------|--------|--------|-------|-------|-------|
| Canada                           | 99.45  | 65.46  | 134.03 | 76.82  | 51.96  | 102.04 | -0.19 | -0.21 | -0.17 |
| Cape Verde                       | 39.7   | 20.71  | 60.7   | 37.55  | 22.69  | 52.81  | 0.46  | 0.72  | 0.34  |
| Central African Republic         | 192.22 | 178.29 | 206.62 | 185.59 | 152.54 | 219.52 | 0.18  | 0.02  | 0.29  |
| Chad                             | 64.07  | 63.93  | 64.22  | 58.7   | 47.66  | 69.71  | 0.34  | 0.09  | 0.57  |
| Chile                            | 98.26  | 74.1   | 123.07 | 103.92 | 61.16  | 147.83 | 0.22  | -0.11 | 0.46  |
| China                            | 64.33  | 52.46  | 75.59  | 59.72  | 46.54  | 72.13  | 0.38  | 0.45  | 0.32  |
| Colombia                         | 103.62 | 88.67  | 118.77 | 60.67  | 48.98  | 72.73  | -0.22 | -0.32 | -0.14 |
| Comoros                          | 111.45 | 90.17  | 132.59 | 52.74  | 40     | 65.24  | 0.02  | -0.05 | 0.06  |
| Congo                            | 178.57 | 167.07 | 190.14 | 141.31 | 151.1  | 131.53 | 0.12  | 0.13  | 0.10  |
| Costa Rica                       | 68.52  | 57.27  | 79.6   | 107.94 | 77.73  | 138.1  | 0.65  | 0.41  | 0.83  |
| Cote d'Ivoire                    | 89.55  | 71.61  | 106.09 | 69.07  | 45.79  | 91.55  | 0.09  | -0.08 | 0.19  |
| Croatia                          | 166.93 | 147.7  | 187.36 | 247.69 | 225.71 | 271.27 | 0.60  | 0.58  | 0.62  |
| Cuba                             | 73.46  | 73.86  | 73.06  | 157.73 | 109.61 | 205.4  | 1.06  | 0.42  | 1.70  |
| Cyprus                           | 112.4  | 92.68  | 132.63 | 63     | 41.7   | 85.77  | -0.35 | -0.47 | -0.25 |
| Czech Republic                   | 161.72 | 124.64 | 201.01 | 132.63 | 94.02  | 172.48 | 0.02  | -0.09 | 0.10  |
| Democratic Republic of the Congo | 130.17 | 138.8  | 121.33 | 106.33 | 101.79 | 110.9  | 0.33  | 0.19  | 0.49  |
| Denmark                          | 109.58 | 85.27  | 134.59 | 87.54  | 55.81  | 119.77 | -0.01 | -0.21 | 0.12  |
| Djibouti                         | 106.86 | 80.03  | 133.37 | 93.53  | 56.57  | 130.16 | 0.20  | -0.01 | 0.30  |
| Dominica                         | 330.56 | 293.77 | 367.63 | 471.51 | 257.12 | 689.3  | 0.29  | -0.13 | 0.57  |
| Dominican Republic               | 193.8  | 206.6  | 181.16 | 74.21  | 80     | 68.39  | -0.48 | -0.47 | -0.50 |
| Ecuador                          | 105.73 | 100.04 | 111.36 | 51.16  | 41.56  | 60.75  | -0.32 | -0.41 | -0.25 |
| Egypt                            | 728.75 | 650.84 | 806.13 | 501.53 | 434.28 | 567.39 | 0.19  | 0.20  | 0.17  |
| El Salvador                      | 162.95 | 133.17 | 194.14 | 42.63  | 23.65  | 64.08  | -0.61 | -0.74 | -0.51 |
| Equatorial Guinea                | 247.53 | 247.61 | 247.46 | 157.07 | 141.56 | 171.81 | 0.22  | 0.10  | 0.34  |
| Eritrea                          | 94.42  | 78.29  | 110.75 | 71.54  | 61.07  | 81.96  | 0.34  | 0.33  | 0.32  |
| Estonia                          | 505.92 | 260.75 | 784.92 | 397.68 | 172.41 | 662.19 | 0.00  | -0.21 | 0.14  |
| Ethiopia                         | 117.04 | 100.36 | 133.82 | 53.2   | 40.25  | 66.19  | 0.42  | 0.24  | 0.55  |
| Federated States of Micronesia   | 250.39 | 257.8  | 243.29 | 221.79 | 193.53 | 248.71 | 0.19  | 0.00  | 0.38  |
| Fiji                             | 159.21 | 150.9  | 167.26 | 310.92 | 287.61 | 333.47 | 0.70  | 0.60  | 0.79  |
| Finland                          | 158.28 | 121.57 | 197.21 | 237.75 | 107.61 | 371.9  | 0.72  | -0.02 | 1.22  |
| France                           | 171.6  | 134.15 | 211.1  | 128.33 | 100.79 | 157.64 | -0.17 | -0.19 | -0.15 |
| Gabon                            | 183.44 | 148.96 | 219.35 | 135.62 | 116.17 | 154.63 | 0.11  | 0.14  | 0.07  |
| Georgia                          | 130.8  | 92.3   | 173.28 | 187.28 | 85.15  | 298.99 | 0.44  | -0.01 | 0.66  |
| Germany                          | 285.77 | 267.86 | 305.01 | 205.65 | 147.31 | 265.98 | -0.19 | -0.38 | -0.02 |
| Ghana                            | 120.3  | 156.46 | 85.29  | 138.13 | 147.21 | 128.96 | 0.93  | 0.64  | 1.41  |
| Greece                           | 253.2  | 264.69 | 241.41 | 158.37 | 161.76 | 154.8  | -0.37 | -0.39 | -0.35 |
| Greenland                        | 274.52 | 128.18 | 401.18 | 244.8  | 84.94  | 383.41 | 0.24  | -0.05 | 0.31  |
| Grenada                          | 312.07 | 346.16 | 277.1  | 320.47 | 264.27 | 376.32 | 0.13  | -0.14 | 0.46  |
| Guam                             | 150.49 | 164.92 | 137.88 | 221.93 | 179.46 | 263.21 | 0.09  | -0.20 | 0.41  |
| Guatemala                        | 148.39 | 128.32 | 168.75 | 39.45  | 30.86  | 48.41  | -0.51 | -0.54 | -0.49 |
| Guinea                           | 78.95  | 86.82  | 70.91  | 53.66  | 41.25  | 66.02  | 0.28  | -0.09 | 0.70  |
| Guinea-Bissau                    | 94.8   | 91.11  | 98.57  | 81.15  | 67.71  | 94.77  | 0.27  | 0.09  | 0.44  |
| Guyana                           | 283.69 | 286.09 | 281.22 | 268.77 | 214.85 | 322.18 | 0.08  | -0.13 | 0.28  |
| Haiti                            | 417.67 | 501.58 | 331.28 | 230.01 | 243.08 | 216.65 | 0.06  | -0.09 | 0.28  |
| Honduras                         | 189.01 | 169.5  | 208.39 | 101.96 | 70.48  | 133.44 | -0.15 | -0.37 | 0.03  |
| Hungary                          | 547.64 | 410.88 | 695.58 | 388.26 | 233.36 | 559.03 | -0.09 | -0.32 | 0.09  |
| Iceland                          | 61.17  | 45.91  | 76.3   | 33.7   | 20.26  | 47.43  | -0.36 | -0.48 | -0.29 |
| India                            | 25.49  | 21.93  | 28.82  | 49.77  | 47.13  | 52.22  | 2.35  | 3.03  | 1.88  |
| Indonesia                        | 93.56  | 69.33  | 117.59 | 84.17  | 67.9   | 100.22 | 0.39  | 0.57  | 0.27  |
| Iran                             | 96.98  | 86.79  | 106.81 | 83.94  | 59.16  | 108.35 | 0.65  | 0.38  | 0.84  |
| Iraq                             | 280.2  | 220.37 | 338.95 | 197.33 | 137.64 | 255.53 | -0.13 | -0.16 | -0.12 |
| Ireland                          | 188.83 | 158.91 | 219.01 | 81.87  | 46.83  | 117.94 | -0.47 | -0.64 | -0.34 |
| Israel                           | 124.48 | 119.05 | 129.94 | 45.3   | 36.39  | 54.36  | -0.56 | -0.64 | -0.49 |
| Italy                            | 433.83 | 423.62 | 444.67 | 170.22 | 151.53 | 190.09 | -0.57 | -0.63 | -0.51 |
| Jamaica                          | 207.72 | 217.55 | 197.63 | 146.43 | 117.69 | 175.4  | -0.33 | -0.46 | -0.18 |
| Japan                            | 121.12 | 108.83 | 133.84 | 96.02  | 85.22  | 107.38 | -0.30 | -0.29 | -0.30 |
| Jordan                           | 46.42  | 43.93  | 48.68  | 19.54  | 13.02  | 25.75  | -0.36 | -0.54 | -0.23 |
| Kazakhstan                       | 152.33 | 117.35 | 189.5  | 291.36 | 163.1  | 428.79 | 1.08  | 0.59  | 1.37  |
| Kenya                            | 43.63  | 38.93  | 48.36  | 40.76  | 29.38  | 52.13  | 0.29  | 0.07  | 0.47  |
| Kiribati                         | 464    | 423.56 | 505.29 | 281.21 | 203.16 | 361.28 | -0.14 | -0.26 | -0.05 |
| Kuwait                           | 61     | 53.76  | 67.34  | 28.42  | 20.35  | 34.72  | -0.42 | -0.56 | -0.33 |

|                                  |        |        |          |          |        |          |       |       |       |
|----------------------------------|--------|--------|----------|----------|--------|----------|-------|-------|-------|
| Kyrgyzstan                       | 138.1  | 81.27  | 197.37   | 224.66   | 100.44 | 351.51   | 1.30  | 0.84  | 1.42  |
| Laos                             | 320.08 | 326.98 | 313.17   | 154.7    | 141.52 | 168.01   | 0.34  | 0.25  | 0.43  |
| Latvia                           | 700.85 | 394.63 | 1,053.58 | 968.6    | 454.9  | 1,566.87 | 0.61  | 0.30  | 0.77  |
| Lebanon                          | 181.78 | 147.56 | 216.94   | 70.92    | 61.32  | 80.42    | -0.32 | -0.36 | -0.29 |
| Lesotho                          | 200.05 | 195.78 | 204.57   | 345.67   | 327.66 | 364.05   | 0.08  | -0.01 | 0.13  |
| Liberia                          | 84.46  | 86.9   | 82       | 43.08    | 34.48  | 51.54    | 0.32  | -0.03 | 0.71  |
| Libya                            | 416.01 | 405.85 | 425.1    | 170.25   | 134.12 | 205.94   | -0.56 | -0.61 | -0.53 |
| Lithuania                        | 225.64 | 128.08 | 334.21   | 461.63   | 185.16 | 783.16   | 1.05  | 0.47  | 1.32  |
| Luxembourg                       | 193.83 | 165.14 | 223.69   | 74.85    | 62.72  | 87.04    | -0.45 | -0.49 | -0.41 |
| Macedonia                        | 495.97 | 532.14 | 460.23   | 611.61   | 649.21 | 573.69   | 0.33  | 0.32  | 0.34  |
| Madagascar                       | 140.88 | 107.35 | 174.52   | 111.23   | 73.43  | 149.26   | 0.47  | 0.30  | 0.54  |
| Malawi                           | 85.92  | 83.37  | 88.55    | 53.47    | 43.39  | 63.59    | 0.35  | 0.16  | 0.51  |
| Malaysia                         | 108.25 | 91.65  | 124.36   | 89.63    | 54.4   | 125.5    | -0.12 | -0.33 | 0.01  |
| Maldives                         | 99.99  | 118.53 | 82.38    | 35.39    | 31.8   | 38.95    | -0.05 | -0.24 | 0.21  |
| Mali                             | 86.26  | 99.84  | 72.39    | 51.22    | 53.92  | 48.57    | 0.05  | -0.05 | 0.20  |
| Malta                            | 207.36 | 209.31 | 205.34   | 92.99    | 75.08  | 111.04   | -0.55 | -0.64 | -0.46 |
| Marshall Islands                 | 242.61 | 247.79 | 237.65   | 279.16   | 237.65 | 319.24   | 0.39  | 0.14  | 0.63  |
| Mauritania                       | 66.18  | 58.55  | 73.85    | 39.13    | 33.02  | 45.15    | 0.08  | 0.00  | 0.14  |
| Mauritius                        | 84.64  | 65.05  | 104.31   | 116.43   | 67.82  | 166.24   | 0.35  | 0.00  | 0.58  |
| Mexico                           | 54.23  | 47.69  | 60.84    | 49.31    | 38.83  | 59.89    | 0.20  | 0.05  | 0.32  |
| Moldova                          | 82.16  | 58.81  | 107.77   | 148.62   | 71.46  | 232.04   | 1.20  | 0.51  | 1.56  |
| Mongolia                         | 173.94 | 169.6  | 178.39   | 194.25   | 108.08 | 282.17   | 0.63  | 0.09  | 1.06  |
| Montenegro                       | 392.97 | 356.86 | 429.39   | 511.53   | 412.13 | 613.29   | 0.26  | 0.15  | 0.35  |
| Morocco                          | 247.74 | 285.35 | 209.98   | 112.76   | 100.4  | 125.41   | -0.32 | -0.47 | -0.10 |
| Mozambique                       | 71.76  | 65.68  | 78.4     | 66.68    | 49.09  | 85.08    | 0.70  | 0.34  | 0.98  |
| Myanmar                          | 150.69 | 112.56 | 190.37   | 127.36   | 105.69 | 150.02   | 0.48  | 0.76  | 0.29  |
| Namibia                          | 215.54 | 204.22 | 227.35   | 171.42   | 134.09 | 210.75   | -0.08 | -0.22 | 0.04  |
| Nepal                            | 21.66  | 16.35  | 27.04    | 28.06    | 20.55  | 36.04    | 1.96  | 2.08  | 1.84  |
| Netherlands                      | 208.78 | 176.16 | 242.14   | 99.29    | 82.96  | 115.89   | -0.48 | -0.51 | -0.46 |
| New Zealand                      | 200.05 | 118.69 | 283.91   | 115.6    | 60.83  | 172.47   | -0.31 | -0.42 | -0.23 |
| Nicaragua                        | 109.37 | 102.24 | 116.6    | 44.2     | 34.36  | 54.31    | -0.28 | -0.39 | -0.18 |
| Niger                            | 71.32  | 71.53  | 71.1     | 39.66    | 31.59  | 47.6     | 0.30  | 0.03  | 0.56  |
| Nigeria                          | 70.86  | 64.66  | 76.94    | 42.97    | 27.66  | 57.71    | 0.10  | -0.21 | 0.34  |
| North Korea                      | 108.9  | 89.13  | 129.84   | 75.79    | 62.23  | 89.96    | -0.25 | -0.21 | -0.28 |
| Northern Mariana Islands         | 119.89 | 123.76 | 116.41   | 117.17   | 77.91  | 156.71   | 0.23  | -0.14 | 0.57  |
| Norway                           | 85.69  | 68.25  | 103.51   | 69.24    | 57.49  | 80.86    | 0.05  | 0.02  | 0.09  |
| Oman                             | 33.38  | 38.29  | 29.47    | 25.58    | 19.06  | 28.89    | 0.31  | -0.10 | 0.64  |
| Pakistan                         | 22.82  | 14.48  | 30.56    | 47.86    | 41.71  | 53.68    | 2.16  | 3.56  | 1.52  |
| Palestine                        | 108.59 | 81.85  | 134.66   | 58.4     | 29.05  | 86.93    | -0.18 | -0.44 | -0.06 |
| Panama                           | 68.71  | 51.68  | 85.36    | 97.81    | 66.64  | 128.8    | 0.51  | 0.38  | 0.58  |
| Papua New Guinea                 | 265.56 | 325.76 | 208.1    | 267.31   | 300.25 | 235.65   | 0.37  | 0.23  | 0.57  |
| Paraguay                         | 61.25  | 57.97  | 64.46    | 53.03    | 40.82  | 64.87    | -0.07 | -0.20 | 0.03  |
| Peru                             | 115.3  | 111.39 | 119.21   | 34.85    | 29.4   | 40.32    | -0.38 | -0.47 | -0.29 |
| Philippines                      | 67.66  | 53.92  | 81.11    | 87.18    | 73.51  | 100.6    | 0.78  | 0.89  | 0.71  |
| Poland                           | 414.55 | 326.53 | 507.13   | 439.79   | 324.29 | 564.1    | 0.23  | 0.13  | 0.30  |
| Portugal                         | 120.8  | 114.99 | 127.06   | 89.18    | 69.37  | 110.3    | -0.11 | -0.30 | 0.08  |
| Puerto Rico                      | 174.92 | 165.26 | 185.19   | 104.35   | 92.43  | 117.23   | -0.36 | -0.45 | -0.27 |
| Qatar                            | 67.18  | 67.06  | 67.23    | 26.19    | 22.05  | 27.74    | -0.46 | -0.55 | -0.43 |
| Romania                          | 387.81 | 321.34 | 456.2    | 606.93   | 413.76 | 812.53   | 0.64  | 0.37  | 0.84  |
| Russia                           | 693.49 | 384.24 | 1,044.66 | 1,285.98 | 676.02 | 2,002.27 | 0.72  | 0.71  | 0.71  |
| Rwanda                           | 119.14 | 108.89 | 129.75   | 60.11    | 48.7   | 72.52    | 0.18  | 0.06  | 0.28  |
| Saint Lucia                      | 316.24 | 307.8  | 324.93   | 274.66   | 197.77 | 354.51   | 0.03  | -0.24 | 0.29  |
| Saint Vincent and the Grenadines | 127.01 | 144.25 | 109.6    | 154.9    | 115.66 | 193.42   | 0.24  | -0.13 | 0.69  |
| Samoa                            | 160.06 | 143.32 | 175.49   | 171.62   | 159.1  | 183.37   | 0.26  | 0.14  | 0.36  |
| Sao Tome and Principe            | 93.05  | 79.6   | 106.75   | 80.88    | 63.39  | 98.5     | 0.55  | 0.40  | 0.65  |
| Saudi Arabia                     | 107.8  | 129.23 | 90.95    | 81.28    | 55.5   | 101.08   | 0.32  | -0.19 | 0.84  |
| Senegal                          | 60.6   | 52.43  | 68.84    | 47.41    | 35.29  | 59.98    | 0.53  | 0.30  | 0.68  |
| Serbia                           | 340.97 | 313.32 | 369.37   | 408.21   | 349.83 | 469.43   | 0.17  | 0.08  | 0.25  |
| Seychelles                       | 64.89  | 31.83  | 98.1     | 54.72    | 23.31  | 85.3     | -0.07 | -0.22 | -0.01 |
| Sierra Leone                     | 86.46  | 78.11  | 94.98    | 63.82    | 53.48  | 74.37    | 0.32  | 0.17  | 0.45  |
| Singapore                        | 147.54 | 110.82 | 183.29   | 64.45    | 48.27  | 81.21    | -0.50 | -0.51 | -0.47 |

|                                |          |          |          |          |          |          |       |       |       |
|--------------------------------|----------|----------|----------|----------|----------|----------|-------|-------|-------|
| Slovakia                       | 170.2    | 115.39   | 227.6    | 182.26   | 96.83    | 272.41   | 0.28  | -0.05 | 0.50  |
| Slovenia                       | 1,017.07 | 1,002.22 | 1,032.82 | 450.6    | 433.39   | 468.12   | -0.48 | -0.51 | -0.45 |
| Solomon Islands                | 221.69   | 249.46   | 195.4    | 254.79   | 261.9    | 247.9    | 0.50  | 0.35  | 0.67  |
| Somalia                        | 121.32   | 111.17   | 131.66   | 78.17    | 69.21    | 87.22    | -0.04 | -0.08 | -0.02 |
| South Africa                   | 283.73   | 292.9    | 274.34   | 288.18   | 261.38   | 315.93   | -0.04 | -0.15 | 0.09  |
| South Korea                    | 100.87   | 97.73    | 104      | 44.22    | 39.13    | 49.37    | -0.49 | -0.55 | -0.44 |
| South Sudan                    | 111.34   | 104.92   | 117.82   | 76.79    | 67.19    | 86.36    | 0.10  | 0.02  | 0.17  |
| Spain                          | 191.44   | 182.71   | 200.53   | 144.9    | 110.67   | 180.02   | -0.10 | -0.32 | 0.13  |
| Sri Lanka                      | 251.85   | 159.19   | 342.71   | 70.3     | 49.71    | 92.44    | -0.61 | -0.58 | -0.61 |
| Sudan                          | 338.65   | 352.65   | 324.76   | 183.17   | 173.14   | 193.13   | 0.05  | -0.03 | 0.13  |
| Suriname                       | 208.94   | 238.93   | 179.92   | 171.46   | 150.42   | 192.43   | -0.06 | -0.25 | 0.18  |
| Swaziland                      | 233.75   | 237.36   | 229.72   | 335.02   | 319.09   | 351.28   | 0.04  | -0.07 | 0.13  |
| Sweden                         | 173.78   | 122.77   | 226.03   | 117.48   | 79.52    | 155.52   | -0.19 | -0.26 | -0.14 |
| Switzerland                    | 141.75   | 105.19   | 180.04   | 81.68    | 59.08    | 104.79   | -0.28 | -0.34 | -0.24 |
| Syria                          | 233.77   | 192.78   | 273.45   | 143.13   | 103.95   | 181.35   | -0.49 | -0.42 | -0.54 |
| Taiwan                         | 103.34   | 73.8     | 130.76   | 70.78    | 50.03    | 91.6     | -0.32 | -0.35 | -0.30 |
| Tajikistan                     | 91.94    | 74.46    | 109.62   | 85.62    | 52.63    | 117.84   | 0.82  | 0.42  | 1.06  |
| Tanzania                       | 84.54    | 75.53    | 93.71    | 63.53    | 51.13    | 76.09    | 0.44  | 0.31  | 0.52  |
| Thailand                       | 328.91   | 254.69   | 404.5    | 55.46    | 35.39    | 76.11    | -0.84 | -0.86 | -0.82 |
| The Bahamas                    | 265.48   | 205.57   | 326.22   | 264.28   | 160.52   | 372.5    | 0.10  | -0.17 | 0.29  |
| The Gambia                     | 58.2     | 55.93    | 60.43    | 37.3     | 24.64    | 50.21    | 0.19  | -0.13 | 0.47  |
| Timor-Leste                    | 211.96   | 223.6    | 200.62   | 95.36    | 93.39    | 97.26    | 0.16  | 0.10  | 0.23  |
| Togo                           | 72.07    | 66.72    | 77.55    | 55.16    | 36.21    | 74.55    | 0.16  | -0.13 | 0.37  |
| Tonga                          | 44.57    | 19.69    | 68.84    | 55.59    | 19.71    | 91.27    | 0.38  | 0.16  | 0.40  |
| Trinidad and Tobago            | 118.79   | 125.7    | 111.84   | 179.83   | 114.72   | 246.67   | 0.44  | -0.09 | 1.00  |
| Tunisia                        | 178.02   | 216.22   | 140.28   | 87.71    | 71.04    | 104.78   | -0.34 | -0.54 | -0.04 |
| Turkey                         | 153.37   | 114.16   | 193.54   | 58.45    | 39.1     | 78.5     | -0.28 | -0.36 | -0.22 |
| Turkmenistan                   | 164.63   | 154.35   | 175.19   | 110.31   | 73.88    | 147.98   | 0.12  | -0.15 | 0.35  |
| Uganda                         | 83.6     | 76.2     | 91.09    | 72.65    | 52.45    | 92.85    | 0.77  | 0.44  | 1.01  |
| Ukraine                        | 312.78   | 170.54   | 478.29   | 527.91   | 244.08   | 863.16   | 0.56  | 0.38  | 0.61  |
| United Arab Emirates           | 176.81   | 136.59   | 197.71   | 149.97   | 81.72    | 174.84   | 0.06  | -0.14 | 0.08  |
| United Kingdom                 | 168.6    | 149.2    | 189.12   | 92.94    | 70.92    | 115.5    | -0.32 | -0.43 | -0.22 |
| United States                  | 262.51   | 182.38   | 346.79   | 189.47   | 134.37   | 246.44   | -0.22 | -0.24 | -0.20 |
| Uruguay                        | 292.14   | 204.41   | 385.26   | 174.44   | 102.75   | 251.24   | -0.33 | -0.46 | -0.24 |
| Uzbekistan                     | 30.01    | 26.12    | 33.98    | 36.92    | 26.96    | 47.22    | 0.65  | 0.44  | 0.80  |
| Vanuatu                        | 225.26   | 237.56   | 213.63   | 276.81   | 276.43   | 277.19   | 0.40  | 0.30  | 0.50  |
| Venezuela                      | 76.77    | 62.38    | 90.93    | 58.35    | 40.79    | 76.05    | -0.26 | -0.30 | -0.25 |
| Vietnam                        | 74.69    | 42.7     | 107.66   | 69.62    | 44.19    | 95.6     | 0.35  | 0.59  | 0.22  |
| Virgin Islands, U.S.           | 245.38   | 169.9    | 325.33   | 409.55   | 221.44   | 616.31   | 0.25  | 0.02  | 0.36  |
| Yemen                          | 352.14   | 390.42   | 313.17   | 156      | 154.11   | 157.85   | -0.06 | -0.15 | 0.05  |
| Zambia                         | 78.19    | 78.68    | 77.69    | 76.43    | 51.25    | 101.67   | 0.64  | 0.14  | 1.09  |
| Zimbabwe                       | 129      | 117.52   | 140.58   | 183.38   | 128.77   | 239.6    | 0.24  | -0.06 | 0.49  |
| <b>Cerebrovascular disease</b> |          |          |          |          |          |          |       |       |       |
| Afghanistan                    | 2,462.74 | 3,465.83 | 1,507.82 | 2,918.51 | 4,012.44 | 1,891.33 | 0.95  | 0.98  | 0.98  |
| Albania                        | 1,508.74 | 1,376.37 | 1,634.81 | 2,338.99 | 2,044.66 | 2,638.06 | 0.74  | 0.72  | 0.76  |
| Algeria                        | 1,200.56 | 1,300.37 | 1,103.20 | 1,148.91 | 1,232.80 | 1,066.17 | 0.37  | 0.34  | 0.39  |
| American Samoa                 | 1,388.31 | 954.51   | 1,798.93 | 941.46   | 885.05   | 997.58   | -0.18 | -0.02 | -0.25 |
| Andorra                        | 816.31   | 727.28   | 910.18   | 661.73   | 528.1    | 800.97   | -0.19 | -0.25 | -0.13 |
| Angola                         | 1,898.78 | 2,083.92 | 1,709.07 | 1,330.65 | 1,569.99 | 1,088.19 | 0.41  | 0.45  | 0.34  |
| Antigua and Barbuda            | 1,890.78 | 1,861.03 | 1,922.59 | 1,185.79 | 1,085.90 | 1,294.72 | -0.31 | -0.36 | -0.25 |
| Argentina                      | 1,732.81 | 1,522.08 | 1,951.84 | 967.16   | 866.19   | 1,072.52 | -0.34 | -0.35 | -0.33 |
| Armenia                        | 1,583.71 | 1,654.27 | 1,508.93 | 1,922.23 | 1,771.27 | 2,096.10 | 0.35  | 0.21  | 0.52  |
| Australia                      | 1,017.37 | 1,046.05 | 988.52   | 633.2    | 648.28   | 618.08   | -0.28 | -0.31 | -0.24 |
| Austria                        | 1,861.60 | 1,998.76 | 1,712.16 | 790.27   | 806.16   | 773.59   | -0.50 | -0.53 | -0.45 |
| Azerbaijan                     | 1,712.75 | 1,751.08 | 1,672.75 | 1,602.92 | 1,488.70 | 1,718.49 | 0.41  | 0.30  | 0.54  |
| Bahrain                        | 597.65   | 643.71   | 563.77   | 305.33   | 331.11   | 289.55   | -0.26 | -0.28 | -0.24 |
| Bangladesh                     | 1,473.20 | 1,671.45 | 1,283.77 | 2,161.09 | 2,011.02 | 2,308.26 | 2.41  | 2.02  | 2.89  |
| Barbados                       | 1,832.03 | 1,791.35 | 1,875.86 | 1,654.77 | 1,614.89 | 1,698.11 | -0.14 | -0.17 | -0.12 |
| Belarus                        | 3,089.89 | 3,282.97 | 2,871.21 | 3,506.14 | 3,267.19 | 3,783.32 | -0.02 | -0.07 | 0.06  |
| Belgium                        | 1,577.92 | 1,655.71 | 1,496.52 | 933.42   | 926.92   | 940.18   | -0.33 | -0.37 | -0.27 |
| Belize                         | 960.58   | 922.44   | 998.08   | 785.09   | 677.92   | 892.9    | -0.03 | -0.07 | 0.02  |

|                                  |          |          |          |          |          |          |       |       |       |
|----------------------------------|----------|----------|----------|----------|----------|----------|-------|-------|-------|
| Benin                            | 1,194.30 | 1,199.61 | 1,188.65 | 1,312.54 | 1,286.29 | 1,338.89 | 1.09  | 1.02  | 1.11  |
| Bermuda                          | 1,206.73 | 1,081.27 | 1,333.77 | 725.4    | 599.18   | 854.04   | -0.24 | -0.34 | -0.15 |
| Bhutan                           | 1,018.50 | 1,078.92 | 962.36   | 814.87   | 698.01   | 915.48   | 0.80  | 0.58  | 0.98  |
| Bolivia                          | 1,468.41 | 1,642.22 | 1,295.80 | 1,007.28 | 1,066.36 | 948.43   | 0.48  | 0.41  | 0.57  |
| Bosnia and Herzegovina           | 1,951.31 | 1,992.19 | 1,910.39 | 2,104.87 | 2,016.91 | 2,193.64 | 0.10  | -0.01 | 0.20  |
| Botswana                         | 933.25   | 1,072.82 | 790.38   | 1,224.64 | 1,276.78 | 1,172.45 | 0.01  | -0.07 | 0.13  |
| Brazil                           | 1,628.17 | 1,488.35 | 1,770.21 | 1,261.27 | 1,124.43 | 1,402.68 | -0.02 | -0.05 | 0.00  |
| Brunei                           | 742.95   | 730.49   | 754.11   | 694.94   | 651.01   | 736.28   | -0.05 | -0.10 | 0.00  |
| Bulgaria                         | 4,762.34 | 4,435.85 | 5,098.02 | 4,228.33 | 3,985.72 | 4,482.94 | -0.13 | -0.14 | -0.13 |
| Burkina Faso                     | 767.3    | 862.83   | 667.33   | 667.02   | 765.8    | 566.96   | 0.61  | 0.61  | 0.59  |
| Burundi                          | 2,903.27 | 3,228.08 | 2,567.07 | 1,066.94 | 1,144.66 | 987.53   | -0.18 | -0.20 | -0.15 |
| Cambodia                         | 2,040.81 | 2,078.25 | 2,000.70 | 1,671.26 | 1,596.15 | 1,750.14 | 1.00  | 0.93  | 1.08  |
| Cameroon                         | 1,279.82 | 1,338.60 | 1,220.30 | 1,279.14 | 1,273.15 | 1,285.13 | 0.33  | 0.26  | 0.37  |
| Canada                           | 770.15   | 767.48   | 772.88   | 579.13   | 571.73   | 586.63   | -0.21 | -0.26 | -0.17 |
| Cape Verde                       | 1,648.50 | 1,474.95 | 1,840.43 | 1,344.74 | 1,280.74 | 1,410.45 | 0.26  | 0.36  | 0.18  |
| Central African Republic         | 2,736.04 | 2,874.33 | 2,593.06 | 2,691.75 | 2,758.01 | 2,623.73 | 0.20  | 0.12  | 0.22  |
| Chad                             | 1,095.12 | 1,191.65 | 997.18   | 1,161.45 | 1,205.59 | 1,117.41 | 0.54  | 0.45  | 0.61  |
| Chile                            | 1,287.93 | 1,203.94 | 1,374.20 | 989.1    | 930.63   | 1,049.14 | -0.12 | -0.17 | -0.07 |
| China                            | 2,579.52 | 2,334.22 | 2,812.22 | 2,515.87 | 1,836.80 | 3,155.52 | 0.45  | 0.28  | 0.56  |
| Colombia                         | 842.02   | 859.12   | 824.69   | 587.93   | 583.1    | 592.91   | -0.07 | -0.16 | 0.01  |
| Comoros                          | 1,737.27 | 1,796.93 | 1,677.99 | 926.43   | 995.76   | 858.36   | 0.15  | 0.20  | 0.11  |
| Congo                            | 2,241.25 | 2,541.46 | 1,939.48 | 1,563.71 | 2,122.19 | 1,006.06 | -0.01 | 0.04  | -0.18 |
| Costa Rica                       | 501.34   | 504.96   | 497.78   | 443.48   | 423.95   | 462.99   | -0.07 | -0.13 | -0.02 |
| Cote d'Ivoire                    | 1,430.99 | 1,281.17 | 1,569.02 | 1,444.35 | 1,322.18 | 1,562.36 | 0.42  | 0.47  | 0.37  |
| Croatia                          | 3,239.86 | 3,214.16 | 3,267.17 | 2,477.27 | 2,482.04 | 2,472.16 | -0.18 | -0.20 | -0.15 |
| Cuba                             | 1,313.79 | 1,300.83 | 1,326.55 | 1,445.12 | 1,339.77 | 1,549.48 | 0.05  | -0.02 | 0.12  |
| Cyprus                           | 1,315.71 | 1,188.75 | 1,445.91 | 630.83   | 504.2    | 766.19   | -0.44 | -0.50 | -0.39 |
| Czech Republic                   | 3,349.67 | 3,427.64 | 3,267.01 | 1,519.65 | 1,535.03 | 1,503.77 | -0.44 | -0.46 | -0.41 |
| Democratic Republic of the Congo | 1,301.53 | 1,602.23 | 993.41   | 1,199.92 | 1,325.70 | 1,073.50 | 0.50  | 0.34  | 0.76  |
| Denmark                          | 1,692.45 | 1,695.82 | 1,688.98 | 972.53   | 922.91   | 1,022.94 | -0.29 | -0.34 | -0.24 |
| Djibouti                         | 1,229.55 | 1,066.60 | 1,390.59 | 1,398.61 | 1,223.39 | 1,572.26 | 0.56  | 0.59  | 0.50  |
| Dominica                         | 1,106.35 | 1,181.31 | 1,030.83 | 1,257.67 | 1,130.42 | 1,386.93 | 0.03  | -0.05 | 0.13  |
| Dominican Republic               | 930.29   | 882.16   | 977.79   | 1,119.87 | 1,004.77 | 1,235.72 | 0.62  | 0.57  | 0.67  |
| Ecuador                          | 865.22   | 810.26   | 919.58   | 695.18   | 639.41   | 750.96   | 0.12  | 0.13  | 0.12  |
| Egypt                            | 2,441.07 | 2,159.36 | 2,720.84 | 1,485.27 | 1,245.66 | 1,719.92 | 0.05  | 0.04  | 0.05  |
| El Salvador                      | 1,101.71 | 1,047.17 | 1,158.83 | 532.61   | 518.35   | 548.73   | -0.28 | -0.27 | -0.30 |
| Equatorial Guinea                | 2,937.72 | 3,285.22 | 2,605.24 | 1,101.87 | 1,205.99 | 1,002.85 | -0.28 | -0.31 | -0.26 |
| Eritrea                          | 1,634.74 | 1,810.14 | 1,457.12 | 1,331.11 | 1,603.78 | 1,059.43 | 0.42  | 0.48  | 0.28  |
| Estonia                          | 3,661.26 | 3,880.47 | 3,411.81 | 1,655.97 | 1,714.12 | 1,587.70 | -0.42 | -0.47 | -0.37 |
| Ethiopia                         | 1,832.40 | 1,871.02 | 1,793.55 | 926.55   | 971.7    | 881.24   | 0.58  | 0.59  | 0.54  |
| Federated States of Micronesia   | 2,114.58 | 1,828.63 | 2,388.30 | 1,735.61 | 1,489.84 | 1,969.69 | 0.10  | 0.09  | 0.11  |
| Fiji                             | 2,004.03 | 1,947.80 | 2,058.52 | 1,845.67 | 1,934.45 | 1,759.83 | -0.20 | -0.17 | -0.23 |
| Finland                          | 1,835.53 | 1,893.61 | 1,773.91 | 1,031.70 | 1,004.28 | 1,059.97 | -0.36 | -0.41 | -0.30 |
| France                           | 1,201.84 | 1,147.15 | 1,259.51 | 772.36   | 726.35   | 821.35   | -0.29 | -0.32 | -0.26 |
| Gabon                            | 2,153.04 | 2,099.51 | 2,208.79 | 1,328.38 | 1,474.68 | 1,185.38 | -0.08 | 0.02  | -0.18 |
| Georgia                          | 3,751.89 | 3,639.86 | 3,875.45 | 3,863.16 | 3,198.79 | 4,589.85 | 0.04  | -0.05 | 0.14  |
| Germany                          | 1,861.71 | 2,005.33 | 1,707.41 | 1,035.48 | 1,024.57 | 1,046.77 | -0.37 | -0.43 | -0.31 |
| Ghana                            | 1,405.39 | 2,034.46 | 796.22   | 1,387.42 | 1,708.03 | 1,063.57 | 0.66  | 0.46  | 1.12  |
| Greece                           | 2,429.32 | 2,609.31 | 2,244.70 | 1,801.14 | 1,859.99 | 1,739.36 | -0.25 | -0.28 | -0.21 |
| Greenland                        | 1,442.25 | 1,410.91 | 1,469.38 | 1,129.09 | 930      | 1,301.70 | 0.09  | -0.06 | 0.22  |
| Grenada                          | 2,290.41 | 2,494.03 | 2,081.44 | 1,676.45 | 1,699.89 | 1,653.16 | -0.20 | -0.24 | -0.15 |
| Guam                             | 1,116.81 | 980.2    | 1,236.13 | 1,584.16 | 1,416.70 | 1,746.92 | 0.05  | 0.06  | 0.04  |
| Guatemala                        | 624.51   | 623      | 626.04   | 547.91   | 553.24   | 542.35   | 0.61  | 0.69  | 0.54  |
| Guinea                           | 1,396.54 | 1,663.57 | 1,123.54 | 1,406.54 | 1,530.04 | 1,283.63 | 0.89  | 0.75  | 1.09  |
| Guinea-Bissau                    | 1,721.49 | 1,883.39 | 1,555.69 | 1,849.04 | 2,040.85 | 1,654.83 | 0.58  | 0.57  | 0.58  |
| Guyana                           | 2,643.62 | 2,316.06 | 2,981.78 | 2,225.54 | 2,011.39 | 2,437.62 | -0.04 | 0.01  | -0.08 |
| Haiti                            | 2,932.13 | 3,780.57 | 2,058.71 | 2,072.54 | 2,566.57 | 1,567.71 | 0.36  | 0.28  | 0.49  |
| Honduras                         | 2,997.95 | 2,912.57 | 3,082.73 | 1,229.44 | 1,098.21 | 1,360.67 | -0.36 | -0.43 | -0.29 |
| Hungary                          | 3,792.41 | 3,624.54 | 3,974.01 | 1,916.47 | 1,850.47 | 1,989.23 | -0.35 | -0.39 | -0.32 |
| Iceland                          | 877.19   | 883.83   | 870.62   | 501.81   | 430.06   | 575.1    | -0.34 | -0.43 | -0.25 |
| India                            | 1,500.77 | 1,499.24 | 1,502.19 | 1,392.35 | 1,201.55 | 1,569.67 | 0.59  | 0.50  | 0.66  |

|                          |          |          |          |          |          |          |       |       |       |
|--------------------------|----------|----------|----------|----------|----------|----------|-------|-------|-------|
| Indonesia                | 1,915.90 | 1,980.11 | 1,852.23 | 2,505.32 | 2,408.98 | 2,600.27 | 1.02  | 0.95  | 1.10  |
| Iran                     | 1,191.76 | 1,045.39 | 1,332.81 | 1,026.79 | 845.48   | 1,205.39 | 0.64  | 0.64  | 0.64  |
| Iraq                     | 1,567.40 | 1,598.66 | 1,536.71 | 1,251.08 | 1,213.50 | 1,287.74 | -0.01 | 0.02  | -0.03 |
| Ireland                  | 1,085.10 | 1,158.64 | 1,010.89 | 541.53   | 511.99   | 571.95   | -0.39 | -0.46 | -0.31 |
| Israel                   | 946.78   | 954.61   | 938.92   | 499.08   | 462.47   | 536.31   | -0.36 | -0.42 | -0.30 |
| Italy                    | 1,716.76 | 1,679.64 | 1,756.14 | 1,154.90 | 1,155.98 | 1,153.74 | -0.26 | -0.29 | -0.24 |
| Jamaica                  | 1,790.05 | 1,929.83 | 1,646.69 | 1,690.74 | 1,694.51 | 1,686.94 | -0.10 | -0.13 | -0.06 |
| Japan                    | 1,642.51 | 1,461.41 | 1,830.13 | 1,457.01 | 1,203.90 | 1,723.57 | -0.21 | -0.26 | -0.18 |
| Jordan                   | 878.34   | 993.52   | 774.11   | 473.53   | 441.98   | 503.55   | -0.19 | -0.31 | -0.05 |
| Kazakhstan               | 2,366.07 | 2,515.01 | 2,207.80 | 2,459.73 | 2,245.02 | 2,689.79 | 0.13  | 0.02  | 0.27  |
| Kenya                    | 690.64   | 772.81   | 607.9    | 658.57   | 655.45   | 661.7    | 0.32  | 0.20  | 0.48  |
| Kiribati                 | 3,410.11 | 2,411.19 | 4,429.85 | 3,511.69 | 2,069.15 | 4,991.40 | 0.46  | 0.32  | 0.49  |
| Kuwait                   | 305.78   | 306.52   | 305.14   | 346.18   | 271.34   | 404.59   | 0.40  | 0.03  | 0.72  |
| Kyrgyzstan               | 2,490.01 | 2,610.33 | 2,364.51 | 2,142.88 | 1,800.91 | 2,492.13 | 0.22  | 0.03  | 0.43  |
| Laos                     | 2,654.32 | 2,814.44 | 2,493.98 | 1,584.87 | 1,505.18 | 1,665.35 | 0.66  | 0.55  | 0.79  |
| Latvia                   | 4,200.14 | 4,554.32 | 3,792.19 | 3,081.11 | 3,213.27 | 2,927.18 | -0.15 | -0.20 | -0.08 |
| Lebanon                  | 1,211.34 | 1,661.23 | 749.06   | 686.32   | 982.16   | 393.46   | -0.01 | -0.09 | 0.01  |
| Lesotho                  | 1,172.79 | 1,187.58 | 1,157.12 | 1,806.11 | 1,906.44 | 1,703.74 | -0.04 | -0.04 | -0.06 |
| Liberia                  | 1,318.85 | 1,426.86 | 1,210.22 | 1,026.31 | 1,166.84 | 888.05   | 1.01  | 0.99  | 0.99  |
| Libya                    | 1,207.30 | 1,249.23 | 1,169.74 | 994.68   | 980      | 1,009.18 | -0.12 | -0.08 | -0.16 |
| Lithuania                | 2,182.68 | 2,297.78 | 2,054.58 | 2,248.74 | 2,246.16 | 2,251.73 | 0.03  | -0.01 | 0.08  |
| Luxembourg               | 2,100.58 | 2,191.03 | 2,006.44 | 680.84   | 679.57   | 682.11   | -0.54 | -0.58 | -0.49 |
| Macedonia                | 3,037.41 | 2,992.12 | 3,082.16 | 3,297.64 | 3,183.91 | 3,412.38 | 0.17  | 0.15  | 0.19  |
| Madagascar               | 2,100.08 | 2,109.11 | 2,091.01 | 1,817.47 | 1,794.83 | 1,840.25 | 0.61  | 0.60  | 0.58  |
| Malawi                   | 902.99   | 1,105.23 | 693.63   | 651.23   | 670.24   | 632.15   | 0.56  | 0.34  | 0.91  |
| Malaysia                 | 1,210.83 | 1,148.17 | 1,271.64 | 1,109.89 | 880.57   | 1,343.46 | -0.03 | -0.13 | 0.05  |
| Maldives                 | 866.25   | 704.17   | 1,020.16 | 476.04   | 307.59   | 643.56   | 0.47  | 0.23  | 0.62  |
| Mali                     | 1,611.04 | 2,013.05 | 1,200.28 | 1,055.69 | 1,330.59 | 786.23   | 0.16  | 0.15  | 0.17  |
| Malta                    | 1,133.03 | 1,094.13 | 1,173.31 | 789.75   | 745.47   | 834.38   | -0.30 | -0.32 | -0.29 |
| Marshall Islands         | 1,917.70 | 1,533.56 | 2,285.06 | 1,781.16 | 1,452.31 | 2,098.73 | 0.12  | 0.12  | 0.12  |
| Mauritania               | 1,183.81 | 1,340.45 | 1,026.24 | 841.34   | 1,012.99 | 672.06   | 0.30  | 0.34  | 0.22  |
| Mauritius                | 2,015.28 | 1,593.07 | 2,439.22 | 1,501.72 | 1,204.83 | 1,805.93 | -0.27 | -0.28 | -0.26 |
| Mexico                   | 546.53   | 554.74   | 538.23   | 526.37   | 510.97   | 541.92   | 0.27  | 0.18  | 0.36  |
| Moldova                  | 2,960.45 | 3,078.90 | 2,830.51 | 2,482.01 | 2,281.25 | 2,699.07 | 0.02  | -0.08 | 0.14  |
| Mongolia                 | 1,779.76 | 1,805.92 | 1,752.99 | 3,193.35 | 2,765.05 | 3,630.35 | 1.63  | 1.61  | 1.70  |
| Montenegro               | 3,068.62 | 3,350.70 | 2,784.09 | 3,410.65 | 3,499.93 | 3,319.25 | 0.07  | 0.04  | 0.12  |
| Morocco                  | 1,179.22 | 1,268.60 | 1,089.49 | 1,082.66 | 1,168.44 | 994.88   | 0.38  | 0.38  | 0.37  |
| Mozambique               | 1,244.32 | 1,169.06 | 1,326.37 | 1,335.85 | 1,203.57 | 1,474.22 | 0.95  | 0.83  | 1.02  |
| Myanmar                  | 2,203.14 | 1,936.79 | 2,480.32 | 2,159.37 | 1,676.11 | 2,664.78 | 0.72  | 0.63  | 0.77  |
| Namibia                  | 1,113.16 | 1,191.29 | 1,031.64 | 797.71   | 748.74   | 849.3    | -0.16 | -0.25 | -0.07 |
| Nepal                    | 1,054.38 | 1,027.95 | 1,081.20 | 1,035.05 | 880.17   | 1,199.75 | 1.24  | 1.10  | 1.36  |
| Netherlands              | 1,162.99 | 1,187.20 | 1,138.24 | 785.11   | 767.83   | 802.68   | -0.27 | -0.32 | -0.21 |
| New Zealand              | 1,113.50 | 1,167.38 | 1,057.97 | 691.43   | 733.44   | 647.81   | -0.26 | -0.29 | -0.23 |
| Nicaragua                | 547.1    | 552.39   | 541.73   | 514.76   | 495.05   | 535.04   | 0.68  | 0.62  | 0.74  |
| Niger                    | 1,150.69 | 1,168.82 | 1,131.96 | 979.26   | 996.78   | 962.04   | 0.98  | 0.98  | 0.97  |
| Nigeria                  | 1,076.38 | 1,160.80 | 993.66   | 624.27   | 586.46   | 660.68   | 0.05  | -0.07 | 0.19  |
| North Korea              | 2,272.10 | 2,405.92 | 2,130.38 | 3,575.99 | 3,398.76 | 3,761.21 | 0.67  | 0.57  | 0.81  |
| Northern Mariana Islands | 1,143.45 | 1,030.72 | 1,244.78 | 668.6    | 439.44   | 899.39   | -0.27 | -0.42 | -0.15 |
| Norway                   | 1,643.69 | 1,647.66 | 1,639.63 | 714.32   | 721.63   | 707.09   | -0.43 | -0.47 | -0.40 |
| Oman                     | 575.1    | 738.66   | 444.62   | 421.14   | 444.03   | 409.53   | 0.25  | 0.09  | 0.54  |
| Pakistan                 | 1,325.17 | 1,168.27 | 1,470.79 | 1,491.18 | 1,230.20 | 1,738.23 | 0.69  | 0.67  | 0.70  |
| Palestine                | 863.49   | 894.64   | 833.11   | 754.39   | 647.25   | 858.53   | 0.33  | 0.15  | 0.50  |
| Panama                   | 853.71   | 784.93   | 920.99   | 722.8    | 614.33   | 830.67   | -0.10 | -0.16 | -0.05 |
| Papua New Guinea         | 2,946.16 | 3,198.89 | 2,704.94 | 2,596.22 | 2,962.88 | 2,243.92 | 0.20  | 0.24  | 0.15  |
| Paraguay                 | 1,054.38 | 1,109.87 | 1,000.15 | 1,164.09 | 1,089.19 | 1,236.73 | 0.18  | 0.11  | 0.26  |
| Peru                     | 1,308.61 | 1,164.12 | 1,453.13 | 476.05   | 448.69   | 503.45   | -0.25 | -0.22 | -0.27 |
| Philippines              | 1,044.34 | 799.44   | 1,284.14 | 1,633.80 | 1,306.97 | 1,954.60 | 1.16  | 1.26  | 1.10  |
| Poland                   | 2,121.70 | 2,176.39 | 2,064.18 | 1,633.40 | 1,507.19 | 1,769.23 | -0.11 | -0.21 | 0.00  |
| Portugal                 | 3,567.95 | 3,404.14 | 3,744.12 | 1,617.73 | 1,488.47 | 1,755.58 | -0.45 | -0.49 | -0.42 |
| Puerto Rico              | 796.64   | 710.98   | 887.71   | 786.87   | 759.94   | 815.97   | 0.06  | 0.04  | 0.06  |
| Qatar                    | 566.69   | 655.08   | 523.05   | 271.05   | 276.03   | 269.18   | -0.34 | -0.43 | -0.28 |



|                                  |          |          |          |          |          |          |       |       |       |
|----------------------------------|----------|----------|----------|----------|----------|----------|-------|-------|-------|
| Romania                          | 3,505.01 | 3,536.54 | 3,472.57 | 3,909.22 | 3,715.49 | 4,115.42 | 0.17  | 0.12  | 0.22  |
| Russia                           | 3,888.94 | 4,306.52 | 3,414.73 | 3,921.26 | 3,779.67 | 4,087.53 | -0.06 | -0.15 | 0.07  |
| Rwanda                           | 1,744.60 | 2,082.10 | 1,395.13 | 828.29   | 902.57   | 747.49   | 0.11  | 0.01  | 0.22  |
| Saint Lucia                      | 1,983.12 | 2,064.93 | 1,898.86 | 1,580.82 | 1,631.08 | 1,528.64 | -0.06 | -0.07 | -0.05 |
| Saint Vincent and the Grenadines | 1,494.34 | 1,727.30 | 1,259.06 | 1,592.60 | 1,556.70 | 1,627.84 | 0.08  | -0.03 | 0.24  |
| Samoa                            | 1,588.37 | 1,241.97 | 1,907.66 | 1,232.38 | 1,185.13 | 1,276.74 | -0.09 | -0.02 | -0.13 |
| Sao Tome and Principe            | 1,576.38 | 1,651.25 | 1,500.14 | 1,390.97 | 1,548.24 | 1,232.51 | 0.57  | 0.64  | 0.46  |
| Saudi Arabia                     | 595.17   | 624.31   | 572.24   | 504.62   | 419.92   | 569.7    | 0.48  | 0.27  | 0.65  |
| Senegal                          | 1,113.91 | 1,140.97 | 1,086.60 | 1,171.01 | 1,287.15 | 1,050.62 | 1.04  | 1.15  | 0.86  |
| Serbia                           | 3,433.03 | 3,615.48 | 3,245.69 | 3,392.69 | 3,459.74 | 3,322.37 | -0.04 | -0.08 | 0.01  |
| Seychelles                       | 1,497.01 | 1,227.22 | 1,767.96 | 1,013.42 | 771.41   | 1,249.01 | -0.25 | -0.33 | -0.19 |
| Sierra Leone                     | 1,285.05 | 1,086.90 | 1,487.30 | 1,369.59 | 1,510.07 | 1,226.23 | 0.91  | 1.37  | 0.53  |
| Singapore                        | 1,201.90 | 1,186.64 | 1,216.76 | 731.69   | 706.02   | 758.26   | -0.30 | -0.34 | -0.26 |
| Slovakia                         | 2,245.31 | 2,165.22 | 2,329.19 | 1,455.52 | 1,341.80 | 1,575.51 | -0.22 | -0.30 | -0.15 |
| Slovenia                         | 2,166.84 | 2,107.85 | 2,229.39 | 1,250.00 | 1,199.71 | 1,301.20 | -0.32 | -0.36 | -0.29 |
| Solomon Islands                  | 2,740.44 | 2,693.89 | 2,784.50 | 2,451.40 | 2,465.97 | 2,437.29 | 0.17  | 0.18  | 0.15  |
| Somalia                          | 2,109.73 | 2,427.91 | 1,785.87 | 1,493.83 | 1,728.18 | 1,257.30 | 0.05  | 0.05  | 0.05  |
| South Africa                     | 1,268.30 | 1,538.12 | 992.2    | 1,223.38 | 1,295.76 | 1,148.44 | -0.09 | -0.20 | 0.09  |
| South Korea                      | 2,342.49 | 2,291.48 | 2,393.28 | 1,261.92 | 1,124.73 | 1,400.78 | -0.38 | -0.45 | -0.32 |
| South Sudan                      | 1,506.94 | 1,719.02 | 1,292.87 | 1,277.13 | 1,461.06 | 1,093.75 | 0.35  | 0.35  | 0.35  |
| Spain                            | 1,589.66 | 1,569.06 | 1,611.13 | 784.19   | 778.18   | 790.36   | -0.41 | -0.44 | -0.38 |
| Sri Lanka                        | 712.93   | 551.35   | 871.41   | 1,097.65 | 895.87   | 1,314.55 | 1.17  | 1.17  | 1.17  |
| Sudan                            | 2,255.21 | 2,522.39 | 1,990.12 | 1,618.80 | 1,729.30 | 1,509.11 | 0.39  | 0.35  | 0.44  |
| Suriname                         | 1,606.23 | 1,603.13 | 1,609.22 | 1,808.75 | 1,670.74 | 1,946.25 | 0.29  | 0.24  | 0.33  |
| Swaziland                        | 1,029.12 | 1,109.24 | 939.51   | 1,439.18 | 1,540.71 | 1,335.50 | 0.02  | -0.03 | 0.06  |
| Sweden                           | 1,547.93 | 1,539.99 | 1,556.06 | 916.08   | 915.17   | 916.98   | -0.29 | -0.32 | -0.26 |
| Switzerland                      | 1,209.51 | 1,197.96 | 1,221.62 | 571.44   | 575.22   | 567.58   | -0.41 | -0.44 | -0.39 |
| Syria                            | 1,984.83 | 1,722.03 | 2,239.20 | 1,152.91 | 959.73   | 1,341.38 | -0.52 | -0.40 | -0.58 |
| Taiwan                           | 1,563.48 | 1,289.63 | 1,817.69 | 1,047.66 | 817.77   | 1,278.33 | -0.34 | -0.39 | -0.30 |
| Tajikistan                       | 1,454.18 | 1,530.32 | 1,377.12 | 1,101.20 | 1,071.28 | 1,130.42 | 0.48  | 0.40  | 0.58  |
| Tanzania                         | 989.7    | 1,088.86 | 888.78   | 787.87   | 812.13   | 763.32   | 0.51  | 0.41  | 0.60  |
| Thailand                         | 1,349.43 | 1,119.42 | 1,583.66 | 1,507.75 | 1,080.98 | 1,946.78 | 0.08  | -0.02 | 0.15  |
| The Bahamas                      | 1,281.82 | 1,242.80 | 1,321.37 | 1,281.40 | 1,235.74 | 1,329.02 | 0.10  | 0.05  | 0.14  |
| The Gambia                       | 962.3    | 1,061.42 | 864.6    | 778.22   | 754.88   | 802.01   | 0.50  | 0.40  | 0.64  |
| Timor-Leste                      | 1,467.43 | 1,590.75 | 1,347.22 | 1,125.90 | 1,254.20 | 1,001.56 | 1.00  | 1.09  | 0.91  |
| Togo                             | 1,250.40 | 1,364.29 | 1,133.55 | 1,195.89 | 1,104.33 | 1,289.61 | 0.44  | 0.29  | 0.62  |
| Tonga                            | 1,181.18 | 1,343.06 | 1,023.23 | 1,127.97 | 1,138.23 | 1,117.76 | 0.05  | -0.02 | 0.15  |
| Trinidad and Tobago              | 1,662.30 | 1,603.86 | 1,721.17 | 1,563.16 | 1,378.15 | 1,753.09 | -0.11 | -0.14 | -0.08 |
| Tunisia                          | 1,326.70 | 1,126.04 | 1,524.92 | 1,153.17 | 933.93   | 1,377.57 | 0.17  | 0.16  | 0.16  |
| Turkey                           | 986.68   | 1,068.30 | 903.06   | 737.05   | 682.47   | 793.56   | 0.42  | 0.20  | 0.69  |
| Turkmenistan                     | 1,762.90 | 1,759.78 | 1,766.11 | 2,017.04 | 1,691.75 | 2,353.43 | 0.92  | 0.71  | 1.13  |
| Uganda                           | 1,304.15 | 1,544.60 | 1,060.54 | 898.62   | 850.2    | 947.08   | 0.40  | 0.14  | 0.75  |
| Ukraine                          | 3,864.24 | 4,177.88 | 3,499.27 | 3,367.61 | 3,283.09 | 3,467.43 | -0.19 | -0.24 | -0.12 |
| United Arab Emirates             | 1,013.66 | 1,115.96 | 960.53   | 931.52   | 883.03   | 949.19   | 0.15  | 0.13  | 0.20  |
| United Kingdom                   | 1,780.91 | 1,899.91 | 1,655.03 | 955.37   | 981.15   | 928.95   | -0.34 | -0.38 | -0.29 |
| United States                    | 901      | 921.39   | 879.55   | 692.92   | 682.35   | 703.85   | -0.17 | -0.24 | -0.10 |
| Uruguay                          | 2,091.97 | 2,018.25 | 2,170.24 | 1,514.15 | 1,556.36 | 1,468.94 | -0.19 | -0.17 | -0.22 |
| Uzbekistan                       | 1,543.44 | 1,572.17 | 1,514.06 | 1,492.15 | 1,324.26 | 1,665.54 | 0.30  | 0.17  | 0.43  |
| Vanuatu                          | 2,769.02 | 2,559.73 | 2,966.92 | 2,645.73 | 2,624.37 | 2,666.55 | 0.09  | 0.14  | 0.04  |
| Venezuela                        | 789.74   | 792.18   | 787.33   | 775.25   | 691.89   | 859.32   | -0.05 | -0.07 | -0.02 |
| Vietnam                          | 1,814.50 | 1,541.19 | 2,096.23 | 2,055.30 | 1,563.46 | 2,557.72 | 0.64  | 0.56  | 0.68  |
| Virgin Islands, U.S.             | 968.75   | 867.57   | 1,075.92 | 1,527.43 | 1,243.97 | 1,839.00 | 0.18  | 0.12  | 0.23  |
| Yemen                            | 2,146.88 | 2,523.55 | 1,763.30 | 1,641.28 | 1,902.96 | 1,384.97 | 0.61  | 0.61  | 0.63  |
| Zambia                           | 934.49   | 1,215.79 | 648.43   | 1,013.91 | 958.57   | 1,069.40 | 0.82  | 0.37  | 1.63  |
| Zimbabwe                         | 906.74   | 1,045.02 | 767.29   | 1,023.28 | 965.47   | 1,082.79 | -0.01 | -0.20 | 0.23  |
| <b>Endocarditis</b>              |          |          |          |          |          |          |       |       |       |
| Afghanistan                      | 35.83    | 51.91    | 20.52    | 44.64    | 63.63    | 26.81    | 1.05  | 1.10  | 1.07  |
| Albania                          | 19.83    | 20.38    | 19.31    | 20.31    | 17.69    | 22.98    | 0.15  | 0.00  | 0.30  |
| Algeria                          | 81.68    | 90.19    | 73.38    | 72.49    | 82.48    | 62.63    | 0.27  | 0.29  | 0.23  |
| American Samoa                   | 57       | 47.53    | 65.96    | 69.79    | 77.68    | 61.94    | 0.49  | 0.72  | 0.26  |
| Andorra                          | 18.26    | 18.58    | 17.93    | 20.11    | 18.39    | 21.9     | 0.11  | 0.02  | 0.21  |

|                                  |        |        |        |        |        |        |       |       |       |
|----------------------------------|--------|--------|--------|--------|--------|--------|-------|-------|-------|
| Angola                           | 76.29  | 81.6   | 70.86  | 62.57  | 66.77  | 58.32  | 0.66  | 0.59  | 0.74  |
| Antigua and Barbuda              | 56.08  | 48.86  | 63.79  | 37.98  | 27.97  | 48.9   | -0.25 | -0.38 | -0.14 |
| Argentina                        | 63.87  | 79.01  | 48.15  | 57.78  | 68.63  | 46.46  | 0.07  | -0.01 | 0.18  |
| Armenia                          | 7.8    | 6.98   | 8.68   | 7.88   | 6      | 10.04  | 0.13  | -0.03 | 0.27  |
| Australia                        | 19.74  | 17.79  | 21.7   | 22.49  | 19.94  | 25.04  | 0.32  | 0.24  | 0.40  |
| Austria                          | 47.77  | 54.42  | 40.52  | 21.85  | 24.36  | 19.22  | -0.46 | -0.48 | -0.43 |
| Azerbaijan                       | 25.26  | 22     | 28.66  | 26.37  | 19.33  | 33.48  | 0.57  | 0.34  | 0.75  |
| Bahrain                          | 43.22  | 48.69  | 39.2   | 21.63  | 23.95  | 20.21  | -0.27 | -0.31 | -0.24 |
| Bangladesh                       | 5.11   | 6      | 4.25   | 9.63   | 10.95  | 8.34   | 3.38  | 3.58  | 3.25  |
| Barbados                         | 70.01  | 68.52  | 71.62  | 77.46  | 72.89  | 82.44  | 0.05  | -0.02 | 0.12  |
| Belarus                          | 17.76  | 11.66  | 24.68  | 27.74  | 14.57  | 43.03  | 0.35  | 0.17  | 0.40  |
| Belgium                          | 41.13  | 50.22  | 31.61  | 55.53  | 62.22  | 48.57  | 0.54  | 0.39  | 0.78  |
| Belize                           | 35.85  | 44.03  | 27.79  | 25.98  | 30.24  | 21.69  | -0.14 | -0.13 | -0.11 |
| Benin                            | 77.98  | 79.04  | 76.85  | 53.25  | 53.66  | 52.84  | 0.31  | 0.30  | 0.31  |
| Bermuda                          | 45.76  | 33.8   | 57.86  | 26.67  | 14.73  | 38.85  | -0.26 | -0.48 | -0.11 |
| Bhutan                           | 7.07   | 8.1    | 6.11   | 14.1   | 15.08  | 13.27  | 3.48  | 3.54  | 3.52  |
| Bolivia                          | 110.49 | 93.66  | 127.22 | 64.48  | 55.11  | 73.83  | 0.26  | 0.27  | 0.25  |
| Bosnia and Herzegovina           | 9.76   | 7.05   | 12.48  | 10.69  | 7.04   | 14.38  | 0.11  | -0.02 | 0.21  |
| Botswana                         | 35.19  | 38.49  | 31.82  | 37.19  | 34.76  | 39.61  | -0.21 | -0.32 | -0.07 |
| Brazil                           | 31.55  | 27.94  | 35.22  | 35.62  | 30.17  | 41.25  | 0.42  | 0.35  | 0.48  |
| Brunei                           | 34.73  | 23.41  | 44.85  | 36.65  | 22.56  | 49.9   | 0.08  | -0.02 | 0.14  |
| Bulgaria                         | 38.01  | 29.72  | 46.52  | 29.69  | 21.03  | 38.77  | -0.24 | -0.32 | -0.17 |
| Burkina Faso                     | 73.47  | 78.09  | 68.64  | 61.69  | 64.24  | 59.12  | 0.56  | 0.50  | 0.62  |
| Burundi                          | 91.93  | 93.15  | 90.67  | 49.53  | 52.04  | 46.97  | 0.21  | 0.27  | 0.14  |
| Cambodia                         | 94.55  | 99.48  | 89.27  | 58     | 56.51  | 59.55  | 0.50  | 0.43  | 0.59  |
| Cameroon                         | 81.57  | 84.88  | 78.23  | 62.21  | 59.22  | 65.21  | 0.02  | -0.06 | 0.10  |
| Canada                           | 19.45  | 18.73  | 20.19  | 24.73  | 22.25  | 27.25  | 0.33  | 0.18  | 0.47  |
| Cape Verde                       | 59.9   | 61.99  | 57.59  | 46.34  | 47.69  | 44.96  | 0.20  | 0.21  | 0.20  |
| Central African Republic         | 67.62  | 68.69  | 66.53  | 69.72  | 64.72  | 74.85  | 0.26  | 0.12  | 0.37  |
| Chad                             | 66.71  | 72.38  | 60.97  | 62.69  | 64.82  | 60.57  | 0.38  | 0.31  | 0.45  |
| Chile                            | 23.13  | 25.08  | 21.12  | 26.33  | 26.22  | 26.44  | 0.31  | 0.13  | 0.52  |
| China                            | 14.59  | 12.49  | 16.58  | 9.85   | 7.44   | 12.12  | 0.00  | -0.03 | 0.01  |
| Colombia                         | 27.45  | 25.59  | 29.33  | 27.8   | 22.32  | 33.45  | 0.35  | 0.08  | 0.61  |
| Comoros                          | 80.72  | 77.43  | 83.98  | 46.85  | 47.58  | 46.14  | 0.25  | 0.32  | 0.18  |
| Congo                            | 65.49  | 68.48  | 62.49  | 58.93  | 68.24  | 49.64  | 0.28  | 0.25  | 0.26  |
| Costa Rica                       | 25     | 18.76  | 31.15  | 29.85  | 23.98  | 35.71  | 0.25  | 0.33  | 0.21  |
| Cote d'Ivoire                    | 74.85  | 72.55  | 76.98  | 58.21  | 53.56  | 62.69  | 0.10  | 0.06  | 0.13  |
| Croatia                          | 18.36  | 15.61  | 21.29  | 14.66  | 11.82  | 17.72  | -0.14 | -0.22 | -0.07 |
| Cuba                             | 22.61  | 24.32  | 20.93  | 23.3   | 23.47  | 23.14  | -0.01 | -0.08 | 0.06  |
| Cyprus                           | 44.64  | 47.73  | 41.47  | 32.2   | 30.13  | 34.41  | -0.16 | -0.26 | -0.04 |
| Czech Republic                   | 20.54  | 16.62  | 24.69  | 27.69  | 21.47  | 34.11  | 0.67  | 0.55  | 0.77  |
| Democratic Republic of the Congo | 47.32  | 54.02  | 40.45  | 43.49  | 48.24  | 38.7   | 0.49  | 0.44  | 0.56  |
| Denmark                          | 21.82  | 24.28  | 19.29  | 27.14  | 24.03  | 30.29  | 0.54  | 0.20  | 0.98  |
| Djibouti                         | 81.15  | 74.03  | 88.19  | 71.09  | 57.52  | 84.55  | 0.20  | 0.07  | 0.27  |
| Dominica                         | 47.45  | 57.02  | 37.8   | 52.77  | 55.77  | 49.73  | 0.01  | -0.03 | 0.10  |
| Dominican Republic               | 53.89  | 65.24  | 42.68  | 32.58  | 34.72  | 30.42  | -0.18 | -0.27 | -0.06 |
| Ecuador                          | 41.3   | 36.91  | 45.65  | 27.79  | 22.27  | 33.32  | -0.06 | -0.14 | 0.00  |
| Egypt                            | 154.42 | 218.85 | 90.44  | 99.68  | 140.53 | 59.68  | 0.12  | 0.16  | 0.10  |
| El Salvador                      | 51.78  | 51.48  | 52.1   | 29.6   | 25.54  | 34.2   | -0.15 | -0.27 | -0.03 |
| Equatorial Guinea                | 90.29  | 98.43  | 82.51  | 58.28  | 55.49  | 60.94  | 0.24  | 0.07  | 0.42  |
| Eritrea                          | 69.68  | 70.24  | 69.12  | 58.45  | 61.33  | 55.58  | 0.47  | 0.47  | 0.43  |
| Estonia                          | 31.39  | 17.67  | 47     | 31.79  | 21.64  | 43.71  | 0.29  | 0.46  | 0.26  |
| Ethiopia                         | 72.08  | 74.89  | 69.25  | 41.47  | 40.35  | 42.59  | 0.80  | 0.66  | 0.92  |
| Federated States of Micronesia   | 96.71  | 115.82 | 78.42  | 100.86 | 119.66 | 82.96  | 0.40  | 0.38  | 0.43  |
| Fiji                             | 187.98 | 218.8  | 158.12 | 240.28 | 269.46 | 212.06 | 0.11  | 0.03  | 0.20  |
| Finland                          | 18.79  | 16.77  | 20.94  | 14.97  | 12.47  | 17.54  | -0.09 | -0.17 | -0.01 |
| France                           | 36.49  | 38.61  | 34.26  | 47.62  | 44.4   | 51.05  | 0.45  | 0.24  | 0.70  |
| Gabon                            | 66.71  | 64.36  | 69.16  | 57.03  | 58.05  | 56.04  | 0.28  | 0.31  | 0.23  |
| Georgia                          | 18.51  | 13.66  | 23.86  | 24.85  | 16.24  | 34.27  | 0.35  | 0.28  | 0.38  |
| Germany                          | 48.85  | 57.87  | 39.15  | 44.63  | 46.17  | 43.04  | 0.03  | -0.10 | 0.24  |
| Ghana                            | 77.9   | 100.42 | 56.1   | 67.66  | 68.93  | 66.37  | 0.47  | 0.20  | 0.91  |

|                          |        |        |        |        |        |        |       |       |       |
|--------------------------|--------|--------|--------|--------|--------|--------|-------|-------|-------|
| Greece                   | 29.39  | 42.77  | 15.67  | 33.2   | 43.87  | 22     | 0.14  | 0.03  | 0.43  |
| Greenland                | 33.24  | 19.32  | 45.3   | 26.51  | 17.09  | 34.67  | 0.11  | 0.26  | 0.05  |
| Grenada                  | 95.57  | 110.7  | 80.05  | 90.38  | 100.49 | 80.34  | 0.04  | 0.02  | 0.08  |
| Guam                     | 34.34  | 33.54  | 35.04  | 87.45  | 83.37  | 91.42  | 0.89  | 0.83  | 0.92  |
| Guatemala                | 52.74  | 58.6   | 46.8   | 33.56  | 28.62  | 38.72  | 0.17  | -0.07 | 0.47  |
| Guinea                   | 83.32  | 92.2   | 74.24  | 49.31  | 51.77  | 46.87  | 0.12  | 0.08  | 0.16  |
| Guinea-Bissau            | 86.02  | 93.26  | 78.61  | 76.39  | 81.93  | 70.78  | 0.33  | 0.31  | 0.36  |
| Guyana                   | 80.54  | 104.2  | 56.12  | 74.86  | 82.7   | 67.09  | 0.05  | -0.08 | 0.34  |
| Haiti                    | 86.17  | 97.82  | 74.18  | 55.01  | 64.85  | 44.97  | 0.23  | 0.25  | 0.18  |
| Honduras                 | 46.15  | 47.59  | 44.73  | 29.6   | 22.94  | 36.25  | 0.00  | -0.27 | 0.30  |
| Hungary                  | 34.96  | 31.5   | 38.71  | 34.16  | 30.16  | 38.56  | 0.25  | 0.14  | 0.35  |
| Iceland                  | 12.78  | 12.94  | 12.63  | 13.7   | 10.93  | 16.53  | 0.24  | 0.00  | 0.50  |
| India                    | 6.49   | 6.85   | 6.15   | 15.28  | 15.12  | 15.44  | 3.05  | 3.14  | 2.98  |
| Indonesia                | 42     | 34.84  | 49.09  | 44.76  | 41.39  | 48.08  | 0.64  | 0.90  | 0.46  |
| Iran                     | 19.02  | 15.7   | 22.22  | 16.58  | 11.86  | 21.24  | 0.66  | 0.53  | 0.73  |
| Iraq                     | 105.76 | 157.44 | 55.01  | 81.62  | 118.22 | 45.91  | -0.04 | 0.01  | -0.03 |
| Ireland                  | 24.08  | 28.7   | 19.42  | 18.45  | 15.77  | 21.21  | -0.06 | -0.32 | 0.34  |
| Israel                   | 18.44  | 19.89  | 16.98  | 20.6   | 17.37  | 23.88  | 0.35  | 0.04  | 0.72  |
| Italy                    | 18.93  | 19.55  | 18.28  | 35.82  | 37.89  | 33.62  | 1.07  | 1.01  | 1.13  |
| Jamaica                  | 43.8   | 47.89  | 39.6   | 49.31  | 51.38  | 47.22  | 0.07  | 0.06  | 0.10  |
| Japan                    | 31.51  | 33.74  | 29.19  | 27.23  | 27.55  | 26.9   | -0.23 | -0.26 | -0.20 |
| Jordan                   | 42.22  | 56.88  | 28.96  | 25.56  | 28.96  | 22.33  | -0.09 | -0.20 | 0.13  |
| Kazakhstan               | 18.75  | 17.47  | 20.12  | 22.15  | 16.6   | 28.11  | 0.28  | 0.09  | 0.46  |
| Kenya                    | 33.01  | 34.51  | 31.51  | 32.82  | 31.18  | 34.47  | 0.38  | 0.28  | 0.49  |
| Kiribati                 | 154.9  | 164.79 | 144.79 | 163.47 | 165.79 | 161.08 | 0.49  | 0.54  | 0.47  |
| Kuwait                   | 18.34  | 28.66  | 9.3    | 14.72  | 18.69  | 11.63  | -0.01 | -0.24 | 0.62  |
| Kyrgyzstan               | 11.71  | 9.19   | 14.34  | 9.23   | 6.35   | 12.17  | 0.11  | 0.03  | 0.15  |
| Laos                     | 125.27 | 127.05 | 123.49 | 81.36  | 77.17  | 85.59  | 0.80  | 0.75  | 0.85  |
| Latvia                   | 25.34  | 14.82  | 37.46  | 22.87  | 15.24  | 31.75  | 0.05  | 0.16  | 0.01  |
| Lebanon                  | 49.42  | 54.25  | 44.46  | 29.31  | 35.37  | 23.31  | 0.03  | 0.01  | 0.01  |
| Lesotho                  | 32.54  | 36.03  | 28.85  | 47.26  | 45.15  | 49.42  | -0.10 | -0.25 | 0.09  |
| Liberia                  | 86.28  | 88.36  | 84.18  | 42.2   | 45.08  | 39.36  | 0.27  | 0.24  | 0.27  |
| Libya                    | 101.21 | 110.33 | 93.04  | 60.6   | 64.86  | 56.4   | -0.36 | -0.31 | -0.41 |
| Lithuania                | 24.13  | 15.23  | 34.02  | 30.44  | 19.77  | 42.84  | 0.27  | 0.32  | 0.24  |
| Luxembourg               | 43.59  | 51.45  | 35.41  | 40.46  | 44.26  | 36.65  | 0.33  | 0.16  | 0.57  |
| Macedonia                | 13.2   | 14.06  | 12.35  | 11.9   | 10.55  | 13.26  | -0.03 | -0.19 | 0.16  |
| Madagascar               | 104.66 | 97.34  | 112    | 90.17  | 77.25  | 103.17 | 0.61  | 0.50  | 0.66  |
| Malawi                   | 56.1   | 60.68  | 51.36  | 41.05  | 40.21  | 41.9   | 0.58  | 0.47  | 0.71  |
| Malaysia                 | 66.97  | 46.66  | 86.68  | 93.71  | 55.97  | 132.16 | 0.48  | 0.36  | 0.52  |
| Maldives                 | 65.95  | 72.41  | 59.81  | 22.14  | 21.94  | 22.34  | -0.10 | -0.15 | -0.04 |
| Mali                     | 85.69  | 101.86 | 69.16  | 59.58  | 71.17  | 48.22  | 0.23  | 0.23  | 0.25  |
| Malta                    | 28.5   | 33.07  | 23.76  | 38.39  | 37.87  | 38.91  | 0.35  | 0.15  | 0.65  |
| Marshall Islands         | 86.74  | 103.5  | 70.7   | 101.41 | 117.09 | 86.27  | 0.41  | 0.34  | 0.48  |
| Mauritania               | 59.71  | 63.4   | 56     | 43.09  | 47.9   | 38.35  | 0.32  | 0.35  | 0.28  |
| Mauritius                | 29.01  | 33.03  | 24.97  | 39.1   | 31.47  | 46.91  | 0.32  | -0.09 | 0.87  |
| Mexico                   | 21.76  | 22.78  | 20.73  | 19.41  | 16.78  | 22.08  | 0.18  | -0.05 | 0.43  |
| Moldova                  | 10.51  | 7.57   | 13.73  | 17.34  | 10.05  | 25.23  | 1.00  | 0.65  | 1.19  |
| Mongolia                 | 7.56   | 6.85   | 8.29   | 8.08   | 5.71   | 10.5   | 0.56  | 0.42  | 0.65  |
| Montenegro               | 11.95  | 10.35  | 13.57  | 13.6   | 11.04  | 16.22  | 0.10  | 0.06  | 0.13  |
| Morocco                  | 135.98 | 160.94 | 110.93 | 117.91 | 142.25 | 92.99  | 0.30  | 0.32  | 0.26  |
| Mozambique               | 47.51  | 51.86  | 42.76  | 46.13  | 42.07  | 50.39  | 0.77  | 0.45  | 1.14  |
| Myanmar                  | 66.21  | 53.37  | 79.58  | 68.97  | 63.57  | 74.61  | 0.82  | 1.24  | 0.54  |
| Namibia                  | 34.54  | 35.66  | 33.38  | 25.21  | 21.68  | 28.94  | -0.15 | -0.28 | -0.02 |
| Nepal                    | 5.08   | 4.7    | 5.46   | 9      | 7.56   | 10.53  | 3.05  | 2.93  | 3.10  |
| Netherlands              | 31.52  | 35.89  | 27.04  | 60.2   | 60.36  | 60.04  | 1.08  | 0.77  | 1.49  |
| New Zealand              | 18.22  | 16.27  | 20.23  | 10.89  | 8.73   | 13.13  | -0.28 | -0.39 | -0.18 |
| Nicaragua                | 29.25  | 30.38  | 28.11  | 20     | 18.72  | 21.3   | 0.22  | 0.11  | 0.33  |
| Niger                    | 72.42  | 79.93  | 64.66  | 40.44  | 45.82  | 35.14  | 0.30  | 0.34  | 0.27  |
| Nigeria                  | 60.78  | 60.72  | 60.83  | 33.49  | 29.85  | 36.99  | 0.00  | -0.09 | 0.09  |
| North Korea              | 21.43  | 17.04  | 26.09  | 15.81  | 13.75  | 17.96  | -0.20 | -0.09 | -0.28 |
| Northern Mariana Islands | 34.63  | 57.18  | 14.37  | 30.5   | 43.05  | 17.86  | 0.11  | 0.02  | 0.45  |

|                                  |        |        |        |        |        |        |       |       |       |
|----------------------------------|--------|--------|--------|--------|--------|--------|-------|-------|-------|
| Norway                           | 25.15  | 27.56  | 22.68  | 24.59  | 24.23  | 24.94  | 0.27  | 0.07  | 0.53  |
| Oman                             | 69.39  | 68.75  | 69.91  | 39.81  | 35.17  | 42.17  | -0.02 | -0.07 | 0.01  |
| Pakistan                         | 6.27   | 4.91   | 7.53   | 14.61  | 13     | 16.12  | 2.51  | 3.20  | 2.08  |
| Palestine                        | 47.63  | 55.41  | 40.05  | 32.39  | 35.96  | 28.92  | 0.03  | 0.04  | 0.05  |
| Panama                           | 25.39  | 21.36  | 29.34  | 30.9   | 26.71  | 35.06  | 0.29  | 0.34  | 0.25  |
| Papua New Guinea                 | 79.98  | 106.35 | 54.81  | 91.37  | 121.88 | 62.05  | 0.56  | 0.54  | 0.57  |
| Paraguay                         | 31.66  | 32.96  | 30.39  | 35.83  | 32.74  | 38.83  | 0.21  | 0.12  | 0.30  |
| Peru                             | 66.3   | 66.81  | 65.78  | 32.01  | 31.82  | 32.21  | 0.00  | -0.04 | 0.03  |
| Philippines                      | 26.38  | 29.33  | 23.49  | 43.15  | 43.72  | 42.6   | 1.26  | 1.06  | 1.50  |
| Poland                           | 31.04  | 23.96  | 38.49  | 22.71  | 13.31  | 32.84  | -0.15 | -0.37 | 0.00  |
| Portugal                         | 34.2   | 35.85  | 32.42  | 42.02  | 41.18  | 42.91  | 0.48  | 0.34  | 0.64  |
| Puerto Rico                      | 42.65  | 34.88  | 50.91  | 44.14  | 36.53  | 52.35  | 0.11  | 0.02  | 0.19  |
| Qatar                            | 11.71  | 10.39  | 12.37  | 6.69   | 6.84   | 6.63   | -0.21 | -0.10 | -0.25 |
| Romania                          | 13.51  | 8.05   | 19.13  | 14.58  | 9.24   | 20.27  | 0.13  | 0.22  | 0.09  |
| Russia                           | 7.77   | 6.98   | 8.66   | 41.39  | 23.83  | 62.01  | 3.95  | 2.32  | 5.38  |
| Rwanda                           | 82.12  | 87.75  | 76.3   | 48.16  | 48.61  | 47.69  | 0.37  | 0.31  | 0.43  |
| Saint Lucia                      | 94.51  | 104.86 | 83.85  | 77.14  | 73.71  | 80.7   | -0.03 | -0.17 | 0.14  |
| Saint Vincent and the Grenadines | 114.79 | 100.14 | 129.59 | 42.03  | 47.52  | 36.64  | -0.63 | -0.49 | -0.73 |
| Samoa                            | 78.71  | 95.25  | 63.47  | 83.64  | 106.17 | 62.48  | 0.24  | 0.14  | 0.28  |
| Sao Tome and Principe            | 119.17 | 123.98 | 114.27 | 76.78  | 78.26  | 75.29  | 0.15  | 0.12  | 0.19  |
| Saudi Arabia                     | 27.87  | 35.79  | 21.64  | 18.88  | 19.92  | 18.08  | 0.19  | 0.05  | 0.38  |
| Senegal                          | 53.87  | 58.3   | 49.41  | 42.05  | 44.77  | 39.23  | 0.53  | 0.49  | 0.54  |
| Serbia                           | 17.16  | 13.43  | 20.99  | 19     | 15.13  | 23.06  | 0.08  | 0.09  | 0.08  |
| Seychelles                       | 61.89  | 55.55  | 68.25  | 54.73  | 44.8   | 64.4   | -0.02 | -0.14 | 0.08  |
| Sierra Leone                     | 87.04  | 86.02  | 88.09  | 57.84  | 59.65  | 55.99  | 0.19  | 0.19  | 0.18  |
| Singapore                        | 18.66  | 14.16  | 23.04  | 25.91  | 21.62  | 30.36  | 0.60  | 0.70  | 0.56  |
| Slovakia                         | 23.66  | 18.32  | 29.26  | 19.23  | 12.94  | 25.86  | -0.03 | -0.20 | 0.11  |
| Slovenia                         | 22.21  | 17.36  | 27.36  | 13.28  | 8.89   | 17.74  | -0.30 | -0.42 | -0.21 |
| Solomon Islands                  | 87.95  | 116.18 | 61.22  | 106.36 | 139.63 | 74.11  | 0.57  | 0.54  | 0.59  |
| Somalia                          | 85.61  | 93.12  | 77.97  | 56.58  | 62.48  | 50.62  | -0.02 | -0.01 | -0.04 |
| South Africa                     | 45.01  | 50.88  | 39     | 37.54  | 36.83  | 38.27  | -0.21 | -0.31 | -0.07 |
| South Korea                      | 47.01  | 54.76  | 39.29  | 17.71  | 17.07  | 18.35  | -0.57 | -0.65 | -0.45 |
| South Sudan                      | 80.45  | 89.9   | 70.92  | 57.16  | 62.48  | 51.86  | 0.13  | 0.10  | 0.17  |
| Spain                            | 46.21  | 50.74  | 41.49  | 42.9   | 46.59  | 39.11  | 0.11  | 0.03  | 0.19  |
| Sri Lanka                        | 68.74  | 60.51  | 76.81  | 57.28  | 40.98  | 74.81  | 0.17  | -0.09 | 0.40  |
| Sudan                            | 69.89  | 81.59  | 58.28  | 54.54  | 63.08  | 46.06  | 0.52  | 0.53  | 0.51  |
| Suriname                         | 42.36  | 53.26  | 31.8   | 35.52  | 38.11  | 32.93  | -0.04 | -0.15 | 0.14  |
| Swaziland                        | 37.07  | 41.85  | 31.73  | 46.07  | 43.38  | 48.83  | -0.09 | -0.28 | 0.14  |
| Sweden                           | 24.58  | 26.6   | 22.5   | 26.11  | 27.35  | 24.87  | 0.28  | 0.18  | 0.39  |
| Switzerland                      | 23.25  | 23.41  | 23.08  | 61.25  | 58.82  | 63.73  | 2.27  | 1.95  | 2.62  |
| Syria                            | 43.18  | 56.21  | 30.58  | 28.27  | 39.2   | 17.61  | -0.46 | -0.25 | -0.60 |
| Taiwan                           | 33.9   | 24.36  | 42.76  | 49.61  | 40.8   | 58.45  | 0.44  | 0.60  | 0.37  |
| Tajikistan                       | 10.53  | 8.94   | 12.14  | 8.85   | 6.82   | 10.83  | 0.64  | 0.53  | 0.71  |
| Tanzania                         | 55.27  | 55.07  | 55.47  | 45.41  | 44.16  | 46.68  | 0.56  | 0.53  | 0.57  |
| Thailand                         | 75.96  | 78.05  | 73.83  | 100.37 | 90.15  | 110.87 | 0.28  | 0.17  | 0.40  |
| The Bahamas                      | 59.44  | 63.01  | 55.83  | 59.12  | 59.82  | 58.4   | 0.10  | 0.00  | 0.19  |
| The Gambia                       | 60.8   | 67.15  | 54.54  | 35.63  | 36.47  | 34.77  | 0.09  | 0.07  | 0.12  |
| Timor-Leste                      | 94.36  | 98.61  | 90.22  | 57.14  | 57.79  | 56.51  | 0.56  | 0.54  | 0.59  |
| Togo                             | 67.8   | 73.99  | 61.46  | 47.03  | 46.08  | 48     | 0.05  | 0.00  | 0.12  |
| Tonga                            | 84.33  | 108.2  | 61.04  | 105.73 | 124.89 | 86.66  | 0.38  | 0.34  | 0.50  |
| Trinidad and Tobago              | 44.74  | 42.31  | 47.19  | 47.42  | 41.86  | 53.12  | 0.01  | -0.01 | 0.02  |
| Tunisia                          | 80.02  | 89.13  | 71.02  | 64.77  | 66.02  | 63.49  | 0.09  | 0.04  | 0.15  |
| Turkey                           | 44.94  | 48.63  | 41.16  | 30.29  | 34.06  | 26.39  | 0.28  | 0.32  | 0.23  |
| Turkmenistan                     | 20.48  | 15.87  | 25.22  | 20.37  | 14.42  | 26.52  | 0.66  | 0.61  | 0.68  |
| Uganda                           | 53.08  | 56.8   | 49.3   | 51.2   | 47.17  | 55.23  | 0.96  | 0.73  | 1.21  |
| Ukraine                          | 20.4   | 14.1   | 27.74  | 28.86  | 18.33  | 41.3   | 0.31  | 0.25  | 0.33  |
| United Arab Emirates             | 37.24  | 38.22  | 36.73  | 45.01  | 36.72  | 48.03  | 0.51  | 0.38  | 0.59  |
| United Kingdom                   | 23.67  | 25.79  | 21.43  | 31.84  | 31.37  | 32.31  | 0.66  | 0.46  | 0.92  |
| United States                    | 34.77  | 31.49  | 38.22  | 42.59  | 38.63  | 46.68  | 0.32  | 0.26  | 0.37  |
| Uruguay                          | 64.85  | 74.36  | 54.76  | 73.73  | 76.77  | 70.48  | 0.27  | 0.11  | 0.49  |
| Uzbekistan                       | 7.93   | 7.01   | 8.86   | 7.88   | 5.63   | 10.2   | 0.33  | 0.12  | 0.49  |

|                                     |          |          |          |          |          |          |       |       |       |
|-------------------------------------|----------|----------|----------|----------|----------|----------|-------|-------|-------|
| Vanuatu                             | 89.71    | 113.87   | 66.86    | 113.16   | 139.34   | 87.64    | 0.44  | 0.37  | 0.52  |
| Venezuela                           | 17.07    | 16.05    | 18.07    | 11.96    | 9.72     | 14.23    | -0.32 | -0.35 | -0.29 |
| Vietnam                             | 34.78    | 24.1     | 45.79    | 36.6     | 28.46    | 44.91    | 0.52  | 0.81  | 0.35  |
| Virgin Islands, U.S.                | 61.42    | 65.42    | 57.19    | 88.22    | 82.05    | 95       | 0.07  | -0.02 | 0.20  |
| Yemen                               | 73.86    | 90.28    | 57.14    | 49.41    | 60.53    | 38.51    | 0.41  | 0.44  | 0.41  |
| Zambia                              | 53.32    | 60.46    | 46.05    | 53.08    | 46.34    | 59.84    | 0.67  | 0.34  | 1.08  |
| Zimbabwe                            | 13       | 6.16     | 19.9     | 17.72    | 5.87     | 29.92    | 0.19  | -0.18 | 0.32  |
| <b>Hemorrhagic and other stroke</b> |          |          |          |          |          |          |       |       |       |
| Afghanistan                         | 1,562.82 | 2,217.20 | 939.86   | 1,874.68 | 2,630.80 | 1,164.69 | 0.97  | 1.03  | 0.96  |
| Albania                             | 1,232.24 | 1,106.44 | 1,352.06 | 1,898.17 | 1,648.26 | 2,152.11 | 0.73  | 0.72  | 0.74  |
| Algeria                             | 836.34   | 899.9    | 774.35   | 663.69   | 705.12   | 622.82   | 0.13  | 0.11  | 0.16  |
| American Samoa                      | 1,021.66 | 687.16   | 1,338.28 | 682.51   | 638.05   | 726.74   | -0.19 | -0.02 | -0.27 |
| Andorra                             | 394.87   | 344.09   | 448.41   | 316.2    | 239.07   | 396.58   | -0.20 | -0.29 | -0.13 |
| Angola                              | 1,445.25 | 1,541.42 | 1,346.70 | 1,004.32 | 1,157.08 | 849.58   | 0.39  | 0.44  | 0.32  |
| Antigua and Barbuda                 | 1,007.41 | 933.99   | 1,085.93 | 752.58   | 656.95   | 856.86   | -0.17 | -0.23 | -0.12 |
| Argentina                           | 774.83   | 681.62   | 871.7    | 569.61   | 487.72   | 655.06   | -0.13 | -0.18 | -0.08 |
| Armenia                             | 808.51   | 808.74   | 808.27   | 904.55   | 806.9    | 1,017.03 | 0.25  | 0.12  | 0.38  |
| Australia                           | 551.75   | 580      | 523.35   | 346.95   | 358.42   | 335.45   | -0.27 | -0.32 | -0.22 |
| Austria                             | 792.04   | 810.71   | 771.69   | 386.89   | 384.59   | 389.31   | -0.42 | -0.44 | -0.39 |
| Azerbaijan                          | 1,269.19 | 1,300.22 | 1,236.81 | 1,164.94 | 1,093.96 | 1,236.74 | 0.38  | 0.28  | 0.50  |
| Bahrain                             | 398.78   | 404.76   | 394.39   | 165.9    | 168.02   | 164.59   | -0.40 | -0.42 | -0.38 |
| Bangladesh                          | 956.94   | 1,082.42 | 837.04   | 1,405.29 | 1,273.18 | 1,534.85 | 2.41  | 1.95  | 2.97  |
| Barbados                            | 860.28   | 802.56   | 922.48   | 938.73   | 874.34   | 1,008.72 | 0.04  | 0.00  | 0.07  |
| Belarus                             | 1,209.57 | 1,215.32 | 1,203.05 | 1,202.80 | 1,028.67 | 1,404.81 | -0.14 | -0.21 | -0.06 |
| Belgium                             | 764.92   | 779.54   | 749.62   | 506.26   | 491.61   | 521.48   | -0.25 | -0.29 | -0.19 |
| Belize                              | 582.04   | 547.97   | 615.54   | 506.41   | 435.69   | 577.54   | 0.04  | 0.00  | 0.07  |
| Benin                               | 851.71   | 792.32   | 914.9    | 938.76   | 864.59   | 1,013.22 | 1.10  | 1.06  | 1.08  |
| Bermuda                             | 638.51   | 555.68   | 722.38   | 405.13   | 315.22   | 496.77   | -0.19 | -0.32 | -0.09 |
| Bhutan                              | 737.67   | 785.24   | 693.46   | 534.91   | 454.37   | 604.26   | 0.63  | 0.41  | 0.82  |
| Bolivia                             | 1,007.72 | 1,125.22 | 891.03   | 601.81   | 632.5    | 571.23   | 0.29  | 0.22  | 0.38  |
| Bosnia and Herzegovina              | 1,145.13 | 1,129.97 | 1,160.31 | 583.98   | 553.56   | 614.69   | -0.48 | -0.52 | -0.45 |
| Botswana                            | 620.44   | 701.23   | 537.73   | 802.56   | 808.67   | 796.44   | -0.01 | -0.10 | 0.12  |
| Brazil                              | 1,268.43 | 1,175.24 | 1,363.09 | 957.47   | 869.4    | 1,048.49 | -0.05 | -0.07 | -0.03 |
| Brunei                              | 517.47   | 516.01   | 518.78   | 455.84   | 430.16   | 479.99   | -0.10 | -0.15 | -0.05 |
| Bulgaria                            | 2,753.23 | 2,512.94 | 3,000.28 | 1,939.36 | 1,747.97 | 2,140.22 | -0.31 | -0.34 | -0.29 |
| Burkina Faso                        | 518.47   | 569.06   | 465.53   | 462.55   | 512.15   | 412.3    | 0.66  | 0.63  | 0.66  |
| Burundi                             | 2,125.61 | 2,303.94 | 1,941.03 | 740.35   | 770.76   | 709.28   | -0.22 | -0.24 | -0.19 |
| Cambodia                            | 1,647.85 | 1,636.66 | 1,659.85 | 1,254.80 | 1,184.59 | 1,328.53 | 0.86  | 0.82  | 0.91  |
| Cameroon                            | 913.53   | 905.05   | 922.12   | 887.57   | 838.64   | 936.46   | 0.29  | 0.23  | 0.32  |
| Canada                              | 325.65   | 331.57   | 319.63   | 232.8    | 230.4    | 235.24   | -0.25 | -0.31 | -0.20 |
| Cape Verde                          | 1,095.18 | 909.14   | 1,300.92 | 885.4    | 784.19   | 989.32   | 0.25  | 0.35  | 0.17  |
| Central African Republic            | 2,000.66 | 2,035.45 | 1,964.68 | 1,970.66 | 1,945.42 | 1,996.58 | 0.20  | 0.11  | 0.23  |
| Chad                                | 766.58   | 788.28   | 744.56   | 831.22   | 819.18   | 843.22   | 0.58  | 0.49  | 0.63  |
| Chile                               | 554.05   | 523.13   | 585.81   | 528.69   | 483.02   | 575.59   | 0.10  | -0.01 | 0.19  |
| China                               | 1,896.61 | 1,697.98 | 2,085.04 | 1,624.46 | 1,156.02 | 2,065.71 | 0.27  | 0.11  | 0.37  |
| Colombia                            | 596.94   | 615.01   | 578.63   | 418.2    | 417.87   | 418.54   | -0.06 | -0.16 | 0.02  |
| Comoros                             | 1,288.50 | 1,254.66 | 1,322.12 | 671.22   | 688.23   | 654.52   | 0.13  | 0.19  | 0.07  |
| Congo                               | 1,579.15 | 1,727.26 | 1,430.27 | 1,089.59 | 1,437.09 | 742.61   | -0.02 | 0.04  | -0.18 |
| Costa Rica                          | 274.86   | 281.95   | 267.88   | 278.08   | 263.51   | 292.63   | 0.06  | -0.03 | 0.15  |
| Cote d'Ivoire                       | 1,054.68 | 875.08   | 1,220.16 | 1,046.15 | 899.84   | 1,187.47 | 0.40  | 0.46  | 0.33  |
| Croatia                             | 1,776.81 | 1,728.68 | 1,827.96 | 1,164.86 | 1,118.53 | 1,214.58 | -0.29 | -0.33 | -0.26 |
| Cuba                                | 676.3    | 674.05   | 678.51   | 705.96   | 627.12   | 784.05   | 0.00  | -0.11 | 0.11  |
| Cyprus                              | 749.82   | 679.18   | 822.27   | 352.71   | 273.14   | 437.77   | -0.45 | -0.53 | -0.39 |
| Czech Republic                      | 1,347.93 | 1,330.62 | 1,366.27 | 555.38   | 525.21   | 586.52   | -0.49 | -0.53 | -0.45 |
| Democratic Republic of the Congo    | 938.24   | 1,110.90 | 761.32   | 847.52   | 903.38   | 791.37   | 0.47  | 0.32  | 0.69  |
| Denmark                             | 920.34   | 923.67   | 916.91   | 525.99   | 499.28   | 553.13   | -0.29 | -0.35 | -0.24 |
| Djibouti                            | 921.76   | 752.52   | 1,088.99 | 1,000.84 | 817.93   | 1,182.13 | 0.48  | 0.50  | 0.44  |
| Dominica                            | 591.74   | 606.24   | 577.12   | 732.06   | 617.74   | 848.19   | 0.12  | 0.01  | 0.23  |
| Dominican Republic                  | 562.46   | 544.26   | 580.42   | 687.76   | 602.97   | 773.11   | 0.65  | 0.52  | 0.76  |
| Ecuador                             | 518.38   | 496.63   | 539.88   | 410.07   | 385.86   | 434.28   | 0.11  | 0.11  | 0.11  |
| Egypt                               | 1,831.83 | 1,513.81 | 2,147.66 | 1,035.03 | 788.57   | 1,276.39 | -0.02 | -0.06 | -0.01 |

|                                |          |          |          |          |          |          |       |       |       |
|--------------------------------|----------|----------|----------|----------|----------|----------|-------|-------|-------|
| El Salvador                    | 738.51   | 711.33   | 766.97   | 345.97   | 342.45   | 349.94   | -0.30 | -0.29 | -0.33 |
| Equatorial Guinea              | 2,088.41 | 2,240.42 | 1,942.98 | 808.83   | 863.32   | 757      | -0.26 | -0.28 | -0.25 |
| Eritrea                        | 1,250.78 | 1,331.43 | 1,169.11 | 969.04   | 1,133.05 | 805.63   | 0.35  | 0.42  | 0.21  |
| Estonia                        | 1,011.97 | 992.66   | 1,033.94 | 455.77   | 427.33   | 489.16   | -0.43 | -0.49 | -0.36 |
| Ethiopia                       | 1,318.34 | 1,318.69 | 1,317.98 | 607.08   | 619.95   | 594.17   | 0.44  | 0.43  | 0.41  |
| Federated States of Micronesia | 1,470.72 | 1,293.83 | 1,640.05 | 1,145.71 | 999.98   | 1,284.52 | 0.05  | 0.03  | 0.06  |
| Fiji                           | 1,434.51 | 1,437.47 | 1,431.64 | 1,254.07 | 1,375.95 | 1,136.23 | -0.24 | -0.20 | -0.29 |
| Finland                        | 780.48   | 739.07   | 824.41   | 432.55   | 394.53   | 471.74   | -0.37 | -0.41 | -0.33 |
| France                         | 651.82   | 592.45   | 714.43   | 412.39   | 374.2    | 453.04   | -0.30 | -0.32 | -0.28 |
| Gabon                          | 1,482.29 | 1,360.82 | 1,608.82 | 900.01   | 934.16   | 866.64   | -0.09 | -0.01 | -0.18 |
| Georgia                        | 2,470.84 | 2,432.95 | 2,512.63 | 2,371.34 | 1,965.88 | 2,814.83 | -0.03 | -0.13 | 0.08  |
| Germany                        | 828.2    | 848.64   | 806.23   | 462.75   | 447.99   | 478.01   | -0.37 | -0.41 | -0.33 |
| Ghana                          | 955.2    | 1,311.34 | 610.31   | 892.23   | 1,027.14 | 755.94   | 0.57  | 0.36  | 0.96  |
| Greece                         | 1,276.73 | 1,328.51 | 1,223.62 | 938.63   | 907.97   | 970.82   | -0.26 | -0.31 | -0.19 |
| Greenland                      | 1,071.42 | 1,102.35 | 1,044.64 | 797.65   | 697.62   | 884.37   | 0.04  | -0.10 | 0.16  |
| Grenada                        | 1,184.01 | 1,271.20 | 1,094.52 | 995.09   | 966.22   | 1,023.77 | -0.08 | -0.15 | 0.01  |
| Guam                           | 720.84   | 620.78   | 808.24   | 933.4    | 816      | 1,047.51 | -0.04 | -0.03 | -0.05 |
| Guatemala                      | 444.57   | 444.28   | 444.85   | 379.79   | 379.88   | 379.7    | 0.57  | 0.62  | 0.52  |
| Guinea                         | 997.63   | 1,105.53 | 887.32   | 979.66   | 995.3    | 964.1    | 0.84  | 0.72  | 0.98  |
| Guinea-Bissau                  | 1,232.35 | 1,267.10 | 1,196.76 | 1,353.95 | 1,432.02 | 1,274.92 | 0.61  | 0.64  | 0.58  |
| Guyana                         | 1,634.75 | 1,434.18 | 1,841.82 | 1,446.85 | 1,330.38 | 1,562.20 | 0.00  | 0.08  | -0.05 |
| Haiti                          | 1,828.90 | 2,374.25 | 1,267.50 | 1,294.32 | 1,613.66 | 967.99   | 0.36  | 0.28  | 0.49  |
| Honduras                       | 2,612.53 | 2,532.52 | 2,691.97 | 793.7    | 674.95   | 912.45   | -0.52 | -0.60 | -0.45 |
| Hungary                        | 1,547.86 | 1,425.70 | 1,680.00 | 649.5    | 582.58   | 723.28   | -0.46 | -0.51 | -0.41 |
| Iceland                        | 452.52   | 462.73   | 442.4    | 254.69   | 214.48   | 295.77   | -0.35 | -0.45 | -0.24 |
| India                          | 1,001.67 | 1,017.64 | 986.8    | 875.56   | 759.45   | 983.46   | 0.50  | 0.40  | 0.58  |
| Indonesia                      | 1,460.66 | 1,476.80 | 1,444.65 | 1,854.97 | 1,734.81 | 1,973.39 | 0.96  | 0.88  | 1.04  |
| Iran                           | 763.39   | 670.92   | 852.5    | 565.66   | 466.93   | 662.91   | 0.41  | 0.41  | 0.41  |
| Iraq                           | 903.17   | 866.16   | 939.51   | 701.62   | 649.51   | 752.43   | -0.04 | 0.01  | -0.07 |
| Ireland                        | 578.39   | 618.65   | 537.77   | 304.85   | 285.6    | 324.68   | -0.35 | -0.43 | -0.26 |
| Israel                         | 491.55   | 498.92   | 484.16   | 268.96   | 237.5    | 300.95   | -0.34 | -0.43 | -0.24 |
| Italy                          | 809.88   | 770.91   | 851.24   | 616.79   | 591.11   | 644.1    | -0.17 | -0.21 | -0.13 |
| Jamaica                        | 960.8    | 1,022.43 | 897.58   | 977.04   | 958.98   | 995.25   | -0.03 | -0.07 | 0.02  |
| Japan                          | 830.01   | 712.52   | 951.73   | 727.86   | 574.66   | 889.2    | -0.22 | -0.27 | -0.18 |
| Jordan                         | 353.76   | 402.35   | 309.79   | 180      | 164.85   | 194.42   | -0.23 | -0.36 | -0.08 |
| Kazakhstan                     | 1,120.15 | 1,168.05 | 1,069.25 | 1,146.33 | 1,068.97 | 1,229.23 | 0.11  | 0.05  | 0.20  |
| Kenya                          | 493.59   | 550.69   | 436.1    | 474.83   | 466.67   | 482.99   | 0.33  | 0.20  | 0.51  |
| Kiribati                       | 2,368.73 | 1,665.26 | 3,086.87 | 2,387.94 | 1,383.45 | 3,418.30 | 0.43  | 0.28  | 0.46  |
| Kuwait                         | 170.47   | 172.58   | 168.62   | 165.49   | 118.69   | 202.02   | 0.20  | -0.20 | 0.55  |
| Kyrgyzstan                     | 1,395.05 | 1,465.95 | 1,321.10 | 1,249.32 | 1,083.50 | 1,418.66 | 0.26  | 0.10  | 0.46  |
| Laos                           | 2,121.37 | 2,193.57 | 2,049.08 | 1,207.94 | 1,122.14 | 1,294.59 | 0.58  | 0.48  | 0.69  |
| Latvia                         | 1,498.39 | 1,582.92 | 1,401.03 | 847.83   | 799.8    | 903.78   | -0.34 | -0.43 | -0.23 |
| Lebanon                        | 716.42   | 997.49   | 427.6    | 357.67   | 519.53   | 197.45   | -0.13 | -0.20 | -0.11 |
| Lesotho                        | 725.36   | 717.28   | 733.92   | 1,130.60 | 1,126.17 | 1,135.13 | -0.03 | -0.07 | -0.01 |
| Liberia                        | 981.47   | 998.79   | 964.05   | 705.62   | 755.22   | 656.82   | 0.86  | 0.84  | 0.85  |
| Libya                          | 955.39   | 964.77   | 946.99   | 611.93   | 581.07   | 642.43   | -0.32 | -0.30 | -0.34 |
| Lithuania                      | 745.46   | 753.87   | 736.1    | 657.28   | 605.67   | 717.3    | -0.11 | -0.18 | -0.04 |
| Luxembourg                     | 1,072.64 | 1,094.59 | 1,049.80 | 380.15   | 367.29   | 393.07   | -0.49 | -0.55 | -0.43 |
| Macedonia                      | 1,640.98 | 1,649.14 | 1,632.91 | 1,630.57 | 1,575.32 | 1,686.31 | 0.07  | 0.03  | 0.11  |
| Madagascar                     | 1,578.32 | 1,525.38 | 1,631.44 | 1,329.36 | 1,236.96 | 1,422.34 | 0.57  | 0.52  | 0.56  |
| Malawi                         | 635.59   | 765.19   | 501.44   | 421.41   | 413.49   | 429.36   | 0.43  | 0.19  | 0.79  |
| Malaysia                       | 911.59   | 855.52   | 965.99   | 791.01   | 610.42   | 974.96   | -0.08 | -0.19 | 0.01  |
| Maldives                       | 653.48   | 531.42   | 769.39   | 329.96   | 206.39   | 452.84   | 0.36  | 0.09  | 0.51  |
| Mali                           | 1,141.45 | 1,365.97 | 912.05   | 768.94   | 926.69   | 614.3    | 0.19  | 0.18  | 0.20  |
| Malta                          | 622.56   | 603.68   | 642.12   | 425.67   | 388.46   | 463.18   | -0.31 | -0.35 | -0.28 |
| Marshall Islands               | 1,398.68 | 1,128.51 | 1,657.05 | 1,240.99 | 1,013.91 | 1,460.27 | 0.07  | 0.06  | 0.07  |
| Mauritania                     | 792.12   | 836.21   | 747.77   | 562.15   | 635.96   | 489.35   | 0.30  | 0.34  | 0.22  |
| Mauritius                      | 1,459.93 | 1,112.00 | 1,809.28 | 1,069.50 | 820.99   | 1,324.13 | -0.28 | -0.29 | -0.27 |
| Mexico                         | 359.68   | 368.61   | 350.66   | 345.82   | 332.78   | 358.99   | 0.27  | 0.16  | 0.38  |
| Moldova                        | 1,501.15 | 1,539.25 | 1,459.36 | 1,186.65 | 1,032.99 | 1,352.77 | -0.04 | -0.16 | 0.10  |
| Mongolia                       | 1,556.12 | 1,539.69 | 1,572.94 | 2,862.41 | 2,469.67 | 3,263.13 | 1.69  | 1.74  | 1.71  |

|                                  |          |          |          |          |          |          |       |       |       |
|----------------------------------|----------|----------|----------|----------|----------|----------|-------|-------|-------|
| Montenegro                       | 2,692.35 | 2,939.84 | 2,442.70 | 2,810.90 | 2,913.47 | 2,705.88 | 0.01  | -0.01 | 0.04  |
| Morocco                          | 715.55   | 747.11   | 683.87   | 555.12   | 579.02   | 530.66   | 0.17  | 0.16  | 0.16  |
| Mozambique                       | 843.98   | 756.44   | 939.42   | 890.64   | 751.4    | 1,036.29 | 0.92  | 0.76  | 1.00  |
| Myanmar                          | 1,598.24 | 1,360.70 | 1,845.44 | 1,537.33 | 1,161.54 | 1,930.33 | 0.68  | 0.61  | 0.72  |
| Namibia                          | 709.53   | 738.52   | 679.29   | 502.94   | 456.69   | 551.67   | -0.17 | -0.27 | -0.09 |
| Nepal                            | 722.23   | 694.23   | 750.64   | 652.78   | 558.73   | 752.8    | 1.07  | 0.97  | 1.13  |
| Netherlands                      | 613.03   | 618.99   | 606.93   | 416.83   | 408.01   | 425.79   | -0.26 | -0.31 | -0.21 |
| New Zealand                      | 652.82   | 715.5    | 588.21   | 388.98   | 427.43   | 349.07   | -0.29 | -0.32 | -0.25 |
| Nicaragua                        | 357.58   | 372.08   | 342.87   | 347.82   | 337.86   | 358.06   | 0.73  | 0.64  | 0.84  |
| Niger                            | 872.89   | 831.86   | 915.3    | 689.47   | 679.13   | 699.64   | 0.84  | 0.90  | 0.78  |
| Nigeria                          | 754.6    | 757.18   | 752.08   | 431.12   | 375.58   | 484.6    | 0.04  | -0.08 | 0.15  |
| North Korea                      | 1,703.06 | 1,792.33 | 1,608.51 | 2,444.03 | 2,302.54 | 2,591.89 | 0.53  | 0.42  | 0.66  |
| Northern Mariana Islands         | 891.37   | 810.82   | 963.77   | 511.24   | 339.25   | 684.45   | -0.28 | -0.43 | -0.17 |
| Norway                           | 826.15   | 824.69   | 827.65   | 371.19   | 364.7    | 377.61   | -0.41 | -0.46 | -0.37 |
| Oman                             | 517.58   | 672.78   | 393.77   | 317.64   | 329.58   | 311.58   | 0.05  | -0.11 | 0.32  |
| Pakistan                         | 864.27   | 766.09   | 955.38   | 968.55   | 799.21   | 1,128.87 | 0.69  | 0.65  | 0.70  |
| Palestine                        | 714.61   | 728.79   | 700.78   | 509.71   | 421.2    | 595.75   | 0.08  | -0.08 | 0.24  |
| Panama                           | 488.34   | 460.12   | 515.94   | 454.01   | 382.79   | 524.82   | -0.01 | -0.11 | 0.07  |
| Papua New Guinea                 | 2,229.01 | 2,459.50 | 2,009.02 | 1,890.47 | 2,186.19 | 1,606.33 | 0.16  | 0.19  | 0.11  |
| Paraguay                         | 800      | 856.22   | 745.06   | 917.78   | 864.49   | 969.47   | 0.23  | 0.14  | 0.33  |
| Peru                             | 962.95   | 828.22   | 1,097.72 | 306.51   | 285.79   | 327.27   | -0.34 | -0.31 | -0.37 |
| Philippines                      | 842.25   | 616.84   | 1,062.98 | 1,297.65 | 1,005.93 | 1,583.99 | 1.13  | 1.26  | 1.05  |
| Poland                           | 954.95   | 888.77   | 1,024.55 | 704.42   | 588.85   | 828.8    | -0.15 | -0.25 | -0.06 |
| Portugal                         | 1,742.73 | 1,601.53 | 1,894.58 | 858.78   | 734.76   | 991.04   | -0.41 | -0.46 | -0.35 |
| Puerto Rico                      | 397.59   | 342.91   | 455.74   | 464.53   | 432.13   | 499.52   | 0.26  | 0.23  | 0.27  |
| Qatar                            | 425.68   | 490.2    | 393.82   | 189.8    | 185.39   | 191.45   | -0.38 | -0.49 | -0.32 |
| Romania                          | 1,809.62 | 1,802.29 | 1,817.16 | 1,987.06 | 1,850.50 | 2,132.41 | 0.15  | 0.09  | 0.21  |
| Russia                           | 1,222.99 | 1,277.00 | 1,161.66 | 1,325.47 | 1,146.96 | 1,535.10 | 0.01  | -0.13 | 0.18  |
| Rwanda                           | 1,226.49 | 1,469.63 | 974.74   | 551.47   | 599.69   | 499.02   | 0.05  | -0.05 | 0.17  |
| Saint Lucia                      | 1,046.19 | 1,073.79 | 1,017.77 | 932.76   | 936.72   | 928.65   | 0.05  | 0.03  | 0.08  |
| Saint Vincent and the Grenadines | 820.54   | 918.12   | 721.98   | 981.14   | 918.33   | 1,042.79 | 0.21  | 0.08  | 0.39  |
| Samoa                            | 1,086.48 | 849.44   | 1,304.97 | 801.16   | 773.16   | 827.45   | -0.14 | -0.07 | -0.17 |
| Sao Tome and Principe            | 1,085.32 | 1,047.27 | 1,124.07 | 950.53   | 985.74   | 915.06   | 0.56  | 0.64  | 0.45  |
| Saudi Arabia                     | 363.34   | 387.01   | 344.72   | 276.82   | 219.8    | 320.62   | 0.33  | 0.08  | 0.54  |
| Senegal                          | 778.71   | 749.58   | 808.11   | 804.6    | 832.68   | 775.5    | 1.01  | 1.12  | 0.84  |
| Serbia                           | 1,724.23 | 1,836.14 | 1,609.32 | 1,244.95 | 1,245.38 | 1,244.49 | -0.29 | -0.35 | -0.24 |
| Seychelles                       | 982.87   | 757.44   | 1,209.28 | 670.09   | 473.77   | 861.2    | -0.24 | -0.33 | -0.19 |
| Sierra Leone                     | 950.97   | 765.43   | 1,140.35 | 967.64   | 1,027.70 | 906.34   | 0.82  | 1.29  | 0.47  |
| Singapore                        | 661.79   | 640.34   | 682.69   | 346.77   | 312.13   | 382.64   | -0.39 | -0.46 | -0.33 |
| Slovakia                         | 1,099.34 | 1,023.67 | 1,178.59 | 569.1    | 486.31   | 656.45   | -0.38 | -0.46 | -0.30 |
| Slovenia                         | 865.22   | 792.94   | 941.86   | 577.85   | 525.32   | 631.31   | -0.22 | -0.26 | -0.18 |
| Solomon Islands                  | 1,975.02 | 1,987.08 | 1,963.61 | 1,739.00 | 1,790.78 | 1,688.82 | 0.15  | 0.16  | 0.13  |
| Somalia                          | 1,507.39 | 1,742.87 | 1,267.70 | 1,079.04 | 1,262.85 | 893.53   | 0.06  | 0.07  | 0.05  |
| South Africa                     | 790.24   | 922.25   | 655.15   | 734.98   | 738.36   | 731.49   | -0.12 | -0.24 | 0.05  |
| South Korea                      | 1,320.36 | 1,277.25 | 1,363.27 | 601.24   | 509.72   | 693.87   | -0.48 | -0.55 | -0.40 |
| South Sudan                      | 1,131.36 | 1,257.41 | 1,004.11 | 913.07   | 1,013.87 | 812.57   | 0.28  | 0.27  | 0.29  |
| Spain                            | 749.51   | 689.75   | 811.76   | 423.67   | 399.35   | 448.61   | -0.33 | -0.35 | -0.30 |
| Sri Lanka                        | 498.2    | 378.98   | 615.13   | 578.34   | 447.95   | 718.51   | 0.63  | 0.58  | 0.68  |
| Sudan                            | 1,568.96 | 1,759.04 | 1,380.37 | 1,009.79 | 1,097.50 | 922.72   | 0.25  | 0.23  | 0.27  |
| Suriname                         | 983.22   | 974.17   | 991.99   | 1,170.47 | 1,052.66 | 1,287.83 | 0.36  | 0.29  | 0.43  |
| Swaziland                        | 692.2    | 730.38   | 649.5    | 943.84   | 975.5    | 911.52   | -0.01 | -0.07 | 0.04  |
| Sweden                           | 711.86   | 707.38   | 716.45   | 422.38   | 411.15   | 433.64   | -0.29 | -0.33 | -0.24 |
| Switzerland                      | 612.58   | 600.32   | 625.41   | 282.06   | 283.68   | 280.41   | -0.43 | -0.45 | -0.41 |
| Syria                            | 1,390.66 | 1,145.94 | 1,627.53 | 713.64   | 547.83   | 875.41   | -0.57 | -0.48 | -0.62 |
| Taiwan                           | 982.79   | 820.48   | 1,133.46 | 613.64   | 456.02   | 771.79   | -0.38 | -0.47 | -0.32 |
| Tajikistan                       | 896.09   | 965.01   | 826.34   | 679.36   | 685.24   | 673.62   | 0.48  | 0.43  | 0.57  |
| Tanzania                         | 691.04   | 746.01   | 635.09   | 515.92   | 524.55   | 507.18   | 0.41  | 0.32  | 0.48  |
| Thailand                         | 1,133.56 | 907.43   | 1,363.86 | 1,100.54 | 731.53   | 1,480.17 | -0.06 | -0.18 | 0.01  |
| The Bahamas                      | 753.81   | 710.83   | 797.39   | 786.74   | 726.52   | 849.55   | 0.15  | 0.08  | 0.21  |
| The Gambia                       | 668.08   | 694.71   | 641.83   | 534.27   | 487.21   | 582.26   | 0.49  | 0.38  | 0.60  |
| Timor-Leste                      | 1,229.45 | 1,316.97 | 1,144.13 | 831.69   | 911.35   | 754.49   | 0.76  | 0.83  | 0.69  |



|                                   |          |          |          |          |          |          |       |       |       |
|-----------------------------------|----------|----------|----------|----------|----------|----------|-------|-------|-------|
| Togo                              | 874.55   | 896.59   | 851.94   | 842.59   | 726.97   | 960.93   | 0.45  | 0.29  | 0.60  |
| Tonga                             | 779.36   | 899.6    | 662.03   | 711.94   | 716.32   | 707.57   | 0.01  | -0.08 | 0.12  |
| Trinidad and Tobago               | 871.08   | 841.91   | 900.47   | 938.15   | 823.91   | 1,055.43 | 0.02  | -0.02 | 0.06  |
| Tunisia                           | 827.51   | 688.62   | 964.71   | 603.75   | 454.49   | 756.51   | -0.02 | -0.07 | 0.01  |
| Turkey                            | 631.42   | 657.63   | 604.56   | 412.79   | 363.29   | 464.05   | 0.24  | 0.04  | 0.47  |
| Turkmenistan                      | 1,616.03 | 1,589.47 | 1,643.33 | 1,856.52 | 1,522.69 | 2,201.75 | 0.92  | 0.70  | 1.14  |
| Uganda                            | 939.13   | 1,116.99 | 758.94   | 642      | 597.47   | 686.57   | 0.39  | 0.10  | 0.77  |
| Ukraine                           | 1,355.43 | 1,366.91 | 1,342.07 | 1,243.58 | 1,069.93 | 1,448.68 | -0.15 | -0.25 | -0.04 |
| United Arab Emirates              | 696.39   | 769.71   | 658.31   | 636.95   | 637.75   | 636.66   | 0.15  | 0.18  | 0.17  |
| United Kingdom                    | 869.89   | 921.44   | 815.37   | 485.38   | 497.46   | 473      | -0.31 | -0.35 | -0.26 |
| United States                     | 398.19   | 405.78   | 390.2    | 309.71   | 299.12   | 320.66   | -0.16 | -0.24 | -0.08 |
| Uruguay                           | 819.53   | 786.63   | 854.45   | 680.68   | 660.79   | 701.98   | -0.07 | -0.10 | -0.05 |
| Uzbekistan                        | 884.97   | 933.43   | 835.44   | 831.96   | 769.7    | 896.26   | 0.26  | 0.15  | 0.39  |
| Vanuatu                           | 1,930.85 | 1,847.27 | 2,009.89 | 1,844.12 | 1,874.17 | 1,814.81 | 0.09  | 0.13  | 0.05  |
| Venezuela                         | 474.82   | 487.56   | 462.29   | 554.87   | 488.22   | 622.1    | 0.13  | 0.07  | 0.21  |
| Vietnam                           | 1,286.67 | 1,012.87 | 1,568.92 | 1,407.32 | 973.84   | 1,850.12 | 0.58  | 0.47  | 0.62  |
| Virgin Islands, U.S.              | 596.96   | 531.92   | 665.87   | 906.79   | 711.63   | 1,121.31 | 0.14  | 0.04  | 0.21  |
| Yemen                             | 1,562.62 | 1,803.10 | 1,317.73 | 1,049.23 | 1,201.64 | 899.94   | 0.41  | 0.42  | 0.42  |
| Zambia                            | 673.89   | 857.3    | 487.38   | 706.61   | 627.62   | 785.81   | 0.76  | 0.27  | 1.57  |
| Zimbabwe                          | 739.25   | 831.09   | 646.64   | 838.21   | 759.38   | 919.35   | -0.01 | -0.21 | 0.24  |
| <b>Hypertensive heart disease</b> |          |          |          |          |          |          |       |       |       |
| Afghanistan                       | 323.81   | 491.91   | 163.78   | 281.72   | 430.56   | 141.96   | 0.43  | 0.50  | 0.37  |
| Albania                           | 65.7     | 64.78    | 66.57    | 61.28    | 62.81    | 59.73    | 0.05  | 0.12  | -0.02 |
| Algeria                           | 158.86   | 209.86   | 109.1    | 190.65   | 248.2    | 133.89   | 0.72  | 0.67  | 0.77  |
| American Samoa                    | 228.31   | 152.79   | 299.8    | 126.09   | 104.76   | 147.31   | -0.33 | -0.28 | -0.34 |
| Andorra                           | 52.83    | 52.25    | 53.43    | 49.32    | 45.27    | 53.55    | -0.06 | -0.11 | -0.01 |
| Angola                            | 377.05   | 502.34   | 248.66   | 288.95   | 388.9    | 187.7    | 0.54  | 0.49  | 0.58  |
| Antigua and Barbuda               | 433.52   | 490.92   | 372.12   | 288.64   | 305.09   | 270.69   | -0.26 | -0.32 | -0.19 |
| Argentina                         | 193.42   | 173.7    | 213.92   | 184.85   | 171.68   | 198.59   | 0.13  | 0.13  | 0.14  |
| Armenia                           | 158.43   | 184.2    | 131.11   | 251.77   | 277.82   | 221.77   | 0.77  | 0.70  | 0.85  |
| Australia                         | 53.72    | 59.86    | 47.55    | 43.9     | 48.27    | 39.52    | -0.05 | -0.11 | 0.01  |
| Austria                           | 187.1    | 220.11   | 151.13   | 231.39   | 275.74   | 184.84   | 0.47  | 0.47  | 0.48  |
| Azerbaijan                        | 106.89   | 117.07   | 96.27    | 113.39   | 118.1    | 108.62   | 0.60  | 0.54  | 0.69  |
| Bahrain                           | 52.66    | 79.5     | 32.91    | 32.64    | 53.56    | 19.84    | -0.10 | -0.06 | -0.11 |
| Bangladesh                        | 222.13   | 217.39   | 226.66   | 180.48   | 170.32   | 190.44   | 0.89  | 0.96  | 0.82  |
| Barbados                          | 263.03   | 296.95   | 226.47   | 265.97   | 288.53   | 241.45   | -0.04 | -0.11 | 0.04  |
| Belarus                           | 122.62   | 125.5    | 119.35   | 266.8    | 239.21   | 298.8    | 0.87  | 0.78  | 1.01  |
| Belgium                           | 61.78    | 72.57    | 50.49    | 55.9     | 71.26    | 39.93    | 0.03  | 0.10  | -0.08 |
| Belize                            | 198.6    | 204.65   | 192.66   | 171.87   | 160.81   | 183      | 0.03  | -0.01 | 0.08  |
| Benin                             | 127.67   | 168.21   | 84.54    | 131.09   | 164.65   | 97.4     | 0.95  | 0.84  | 1.16  |
| Bermuda                           | 184.83   | 157.37   | 212.63   | 107.32   | 85.62    | 129.42   | -0.26 | -0.35 | -0.20 |
| Bhutan                            | 228.8    | 231.7    | 226.11   | 167.22   | 146.4    | 185.15   | 0.64  | 0.54  | 0.71  |
| Bolivia                           | 60.84    | 75.68    | 46.09    | 55.24    | 69.78    | 40.75    | 0.96  | 1.00  | 0.90  |
| Bosnia and Herzegovina            | 88.68    | 101      | 76.34    | 103.88   | 117.38   | 90.26    | 0.19  | 0.14  | 0.24  |
| Botswana                          | 309.12   | 397.43   | 218.72   | 398.9    | 490.85   | 306.87   | -0.01 | -0.04 | 0.06  |
| Brazil                            | 171.35   | 173.97   | 168.7    | 204.04   | 204.85   | 203.2    | 0.50  | 0.48  | 0.52  |
| Brunei                            | 63       | 44.1     | 79.92    | 70.94    | 50.46    | 90.22    | 0.15  | 0.16  | 0.15  |
| Bulgaria                          | 496.09   | 462.91   | 530.22   | 1,088.31 | 1,022.54 | 1,157.34 | 1.14  | 1.11  | 1.16  |
| Burkina Faso                      | 193      | 265.85   | 116.75   | 182.42   | 253      | 110.92   | 0.75  | 0.72  | 0.77  |
| Burundi                           | 781.79   | 958.78   | 598.6    | 317.99   | 410.86   | 223.1    | -0.09 | -0.03 | -0.18 |
| Cambodia                          | 270.53   | 277.06   | 263.53   | 216.8    | 215.45   | 218.21   | 0.95  | 0.95  | 0.97  |
| Cameroon                          | 150.78   | 197.74   | 103.22   | 140.01   | 188.55   | 91.49    | 0.23  | 0.26  | 0.15  |
| Canada                            | 36.16    | 39.18    | 33.08    | 40.02    | 40.57    | 39.45    | 0.16  | 0.03  | 0.30  |
| Cape Verde                        | 103.33   | 127.17   | 76.97    | 88.19    | 113.86   | 61.82    | 0.32  | 0.40  | 0.23  |
| Central African Republic          | 561.04   | 699.32   | 418.07   | 563.27   | 655.82   | 468.26   | 0.22  | 0.09  | 0.35  |
| Chad                              | 122.25   | 174.35   | 69.4     | 113.21   | 153.9    | 72.62    | 0.34  | 0.26  | 0.50  |
| Chile                             | 135.64   | 136.73   | 134.51   | 182.26   | 189.37   | 174.97   | 0.54  | 0.49  | 0.58  |
| China                             | 391.08   | 373.54   | 407.72   | 285.75   | 236.91   | 331.75   | 0.08  | 0.03  | 0.13  |
| Colombia                          | 198.23   | 212.92   | 183.34   | 131.28   | 133.76   | 128.73   | -0.12 | -0.22 | -0.01 |
| Comoros                           | 465.33   | 533.07   | 398.02   | 247.22   | 297.99   | 197.37   | 0.15  | 0.21  | 0.07  |
| Congo                             | 486.63   | 635.44   | 337.04   | 358.41   | 534.97   | 182.11   | 0.04  | 0.05  | -0.14 |

|                                  |        |        |        |          |          |        |       |       |       |
|----------------------------------|--------|--------|--------|----------|----------|--------|-------|-------|-------|
| Costa Rica                       | 97.08  | 104.56 | 89.72  | 164.66   | 171.84   | 157.48 | 0.78  | 0.70  | 0.85  |
| Cote d'Ivoire                    | 156.33 | 188.71 | 126.5  | 135.96   | 171      | 102.11 | 0.23  | 0.29  | 0.10  |
| Croatia                          | 493.1  | 627.91 | 349.85 | 348.12   | 394.14   | 298.73 | -0.24 | -0.35 | -0.05 |
| Cuba                             | 105.86 | 111.15 | 100.64 | 273.07   | 260.05   | 285.97 | 1.47  | 1.24  | 1.73  |
| Cyprus                           | 142.22 | 151.01 | 133.21 | 86.13    | 85.34    | 86.98  | -0.29 | -0.34 | -0.25 |
| Czech Republic                   | 72.54  | 69.35  | 75.93  | 128.78   | 126.73   | 130.89 | 1.20  | 1.20  | 1.21  |
| Democratic Republic of the Congo | 320.83 | 450.21 | 188.25 | 310.13   | 393.89   | 225.93 | 0.57  | 0.41  | 0.95  |
| Denmark                          | 68.35  | 71.51  | 65.09  | 53.33    | 54.44    | 52.21  | -0.04 | -0.08 | 0.01  |
| Djibouti                         | 265.76 | 294.79 | 237.08 | 316.2    | 327.94   | 304.57 | 0.63  | 0.53  | 0.69  |
| Dominica                         | 550.31 | 627.79 | 472.27 | 493.32   | 469.88   | 517.14 | -0.19 | -0.26 | -0.08 |
| Dominican Republic               | 161.12 | 165.65 | 156.65 | 213.12   | 215.4    | 210.82 | 0.78  | 0.79  | 0.78  |
| Ecuador                          | 140.41 | 158.33 | 122.7  | 226.71   | 217.27   | 236.15 | 1.26  | 0.96  | 1.65  |
| Egypt                            | 217.88 | 272.8  | 163.33 | 211.11   | 249.47   | 173.53 | 0.68  | 0.65  | 0.77  |
| El Salvador                      | 121.03 | 134.86 | 106.54 | 140.74   | 162.08   | 116.62 | 0.73  | 0.78  | 0.61  |
| Equatorial Guinea                | 646.69 | 845.88 | 456.1  | 273.33   | 333.36   | 216.23 | -0.20 | -0.26 | -0.09 |
| Eritrea                          | 398.33 | 485.38 | 310.18 | 323.17   | 435.25   | 211.5  | 0.42  | 0.50  | 0.20  |
| Estonia                          | 155.37 | 151.95 | 159.26 | 1,019.08 | 1,063.88 | 966.49 | 7.37  | 7.35  | 7.19  |
| Ethiopia                         | 448.12 | 456.31 | 439.89 | 238.22   | 270.63   | 205.71 | 0.66  | 0.80  | 0.45  |
| Federated States of Micronesia   | 328.22 | 294.93 | 360.08 | 279.36   | 251.85   | 305.55 | 0.14  | 0.14  | 0.15  |
| Fiji                             | 324.44 | 338.13 | 311.18 | 562.77   | 592.48   | 534.05 | 0.51  | 0.47  | 0.54  |
| Finland                          | 118.56 | 133.26 | 102.96 | 153.12   | 151.63   | 154.65 | 0.48  | 0.26  | 0.77  |
| France                           | 85.55  | 101.23 | 69.03  | 73.72    | 85.66    | 61.01  | -0.04 | -0.09 | 0.01  |
| Gabon                            | 536.51 | 661.19 | 406.64 | 314.23   | 424.05   | 206.88 | -0.12 | -0.07 | -0.23 |
| Georgia                          | 174.37 | 195.84 | 150.69 | 746.67   | 679.05   | 820.63 | 3.32  | 2.73  | 4.23  |
| Germany                          | 255.42 | 299.98 | 207.53 | 247.03   | 301.89   | 190.3  | 0.09  | 0.13  | 0.03  |
| Ghana                            | 426.22 | 650.41 | 209.11 | 189.68   | 315.48   | 62.61  | -0.25 | -0.16 | -0.52 |
| Greece                           | 107.07 | 134.2  | 79.26  | 173.98   | 195.87   | 151    | 0.64  | 0.47  | 0.94  |
| Greenland                        | 85.53  | 92.98  | 79.09  | 109.01   | 103.56   | 113.73 | 0.78  | 0.59  | 0.98  |
| Grenada                          | 356.22 | 415.31 | 295.57 | 289.68   | 331.02   | 248.6  | -0.11 | -0.11 | -0.10 |
| Guam                             | 720.56 | 642.59 | 788.67 | 436.98   | 356.03   | 515.66 | -0.55 | -0.59 | -0.52 |
| Guatemala                        | 97.18  | 122.14 | 71.87  | 78.17    | 96.37    | 59.19  | 0.48  | 0.50  | 0.46  |
| Guinea                           | 170.98 | 260.08 | 79.88  | 155.68   | 217.81   | 93.84  | 0.71  | 0.59  | 1.14  |
| Guinea-Bissau                    | 197.18 | 272.36 | 120.18 | 187.96   | 261.03   | 113.97 | 0.39  | 0.39  | 0.41  |
| Guyana                           | 624.48 | 632.34 | 616.36 | 520.94   | 526.02   | 515.9  | -0.05 | -0.03 | -0.06 |
| Haiti                            | 534.41 | 684.7  | 379.7  | 425.25   | 504.38   | 344.39 | 0.53  | 0.39  | 0.77  |
| Honduras                         | 197.56 | 200.07 | 195.07 | 224.66   | 230.87   | 218.45 | 0.78  | 0.75  | 0.80  |
| Hungary                          | 517.35 | 569.94 | 460.47 | 475.65   | 501.16   | 447.54 | 0.18  | 0.05  | 0.32  |
| Iceland                          | 46.23  | 45.47  | 46.99  | 42.48    | 38.39    | 46.66  | 0.07  | 0.00  | 0.13  |
| India                            | 322.28 | 302.14 | 341.04 | 312.32   | 285.35   | 337.38 | 0.66  | 0.77  | 0.57  |
| Indonesia                        | 180.3  | 204.98 | 155.83 | 197.14   | 219.66   | 174.93 | 0.69  | 0.72  | 0.68  |
| Iran                             | 259.45 | 262.15 | 256.85 | 369.73   | 340.14   | 398.89 | 1.72  | 1.63  | 1.82  |
| Iraq                             | 210.7  | 265.75 | 156.65 | 170.31   | 208.24   | 133.32 | 0.00  | 0.05  | -0.01 |
| Ireland                          | 47.57  | 51.24  | 43.87  | 36.84    | 34.96    | 38.77  | -0.05 | -0.16 | 0.08  |
| Israel                           | 91.85  | 100.76 | 82.91  | 26.36    | 31       | 21.65  | -0.65 | -0.63 | -0.68 |
| Italy                            | 251.53 | 301.75 | 198.24 | 300.27   | 348.59   | 248.9  | 0.31  | 0.20  | 0.45  |
| Jamaica                          | 427.89 | 480.86 | 373.55 | 305.58   | 323.63   | 287.39 | -0.32 | -0.33 | -0.29 |
| Japan                            | 135.31 | 151.18 | 118.86 | 89.74    | 105.91   | 72.7   | -0.41 | -0.37 | -0.47 |
| Jordan                           | 237.18 | 288.87 | 190.4  | 202.32   | 198.27   | 206.18 | 0.29  | 0.07  | 0.58  |
| Kazakhstan                       | 183.94 | 192.38 | 174.97 | 318.16   | 297.6    | 340.18 | 0.88  | 0.77  | 1.03  |
| Kenya                            | 176.94 | 232.69 | 120.79 | 185.75   | 225.8    | 145.71 | 0.46  | 0.37  | 0.64  |
| Kiribati                         | 328.36 | 284.88 | 372.75 | 164.57   | 129.43   | 200.6  | -0.29 | -0.30 | -0.29 |
| Kuwait                           | 137.61 | 140.28 | 135.27 | 95.77    | 90.55    | 99.84  | -0.14 | -0.25 | -0.04 |
| Kyrgyzstan                       | 147.31 | 148.75 | 145.8  | 146.4    | 126.71   | 166.51 | 0.40  | 0.27  | 0.55  |
| Laos                             | 337.63 | 367.03 | 308.19 | 205.24   | 206.63   | 203.84 | 0.69  | 0.63  | 0.77  |
| Latvia                           | 47.93  | 48.68  | 47.06  | 307.03   | 306.78   | 307.32 | 6.44  | 6.11  | 6.77  |
| Lebanon                          | 170.08 | 212.93 | 126.06 | 88.23    | 126.6    | 50.24  | -0.10 | -0.08 | -0.23 |
| Lesotho                          | 411.82 | 475.73 | 344.14 | 611.33   | 749.62   | 470.24 | -0.07 | -0.06 | -0.13 |
| Liberia                          | 146.5  | 203.11 | 89.57  | 115.59   | 163.28   | 68.66  | 1.04  | 0.95  | 1.08  |
| Libya                            | 82.28  | 115    | 52.97  | 92.61    | 123.42   | 62.17  | 0.20  | 0.26  | 0.15  |
| Lithuania                        | 81.09  | 76.71  | 85.97  | 204.11   | 174.61   | 238.43 | 1.53  | 1.31  | 1.74  |
| Luxembourg                       | 93.82  | 122.04 | 64.44  | 57.83    | 69.74    | 45.88  | -0.12 | -0.23 | 0.08  |

|                                  |          |          |          |          |          |        |       |       |       |
|----------------------------------|----------|----------|----------|----------|----------|--------|-------|-------|-------|
| Macedonia                        | 283.08   | 315.25   | 251.28   | 302.03   | 328.35   | 275.48 | 0.15  | 0.12  | 0.18  |
| Madagascar                       | 559.61   | 623.89   | 495.12   | 510.74   | 586.58   | 434.43 | 0.70  | 0.77  | 0.57  |
| Malawi                           | 289.27   | 398.13   | 176.59   | 223.52   | 269.17   | 177.7  | 0.67  | 0.49  | 1.10  |
| Malaysia                         | 49.98    | 50.4     | 49.57    | 47.39    | 38.74    | 56.2   | 0.00  | -0.13 | 0.13  |
| Maldives                         | 96.33    | 127.3    | 66.92    | 41.85    | 48.67    | 35.07  | 0.17  | 0.08  | 0.34  |
| Mali                             | 189.11   | 283.26   | 92.92    | 111.14   | 167.04   | 56.35  | 0.04  | 0.03  | 0.08  |
| Malta                            | 70.31    | 71.34    | 69.25    | 84.1     | 83.56    | 84.65  | 0.20  | 0.17  | 0.23  |
| Marshall Islands                 | 280.79   | 220.55   | 338.39   | 264.56   | 212.32   | 315.01 | 0.13  | 0.14  | 0.13  |
| Mauritania                       | 130.17   | 184.93   | 75.09    | 86.81    | 127.46   | 46.73  | 0.22  | 0.22  | 0.15  |
| Mauritius                        | 312.41   | 293.1    | 331.8    | 391.55   | 365.66   | 418.08 | 0.23  | 0.20  | 0.25  |
| Mexico                           | 92.65    | 113.24   | 71.84    | 102.75   | 121.83   | 83.48  | 0.46  | 0.38  | 0.56  |
| Moldova                          | 85.41    | 92.48    | 77.65    | 267.09   | 282.37   | 250.58 | 2.80  | 2.80  | 2.84  |
| Mongolia                         | 179.93   | 184.35   | 175.41   | 126.7    | 105.51   | 148.32 | 0.03  | -0.02 | 0.10  |
| Montenegro                       | 36.75    | 44       | 29.44    | 47.81    | 55       | 40.45  | 0.26  | 0.25  | 0.29  |
| Morocco                          | 169.16   | 219.67   | 118.46   | 153.96   | 203      | 103.77 | 0.37  | 0.38  | 0.31  |
| Mozambique                       | 320.63   | 374.96   | 261.41   | 323.81   | 361.61   | 284.27 | 0.84  | 0.70  | 0.97  |
| Myanmar                          | 363.45   | 478.81   | 243.4    | 341.17   | 414.65   | 264.34 | 0.65  | 0.63  | 0.79  |
| Namibia                          | 355.77   | 424.96   | 283.56   | 242.57   | 270.35   | 213.32 | -0.21 | -0.25 | -0.15 |
| Nepal                            | 233.64   | 216.66   | 250.88   | 208.32   | 174.61   | 244.17 | 1.04  | 0.98  | 1.07  |
| Netherlands                      | 45.76    | 52.81    | 38.55    | 45.51    | 52.26    | 38.65  | 0.08  | 0.04  | 0.12  |
| New Zealand                      | 69.55    | 74.42    | 64.53    | 45.27    | 51.26    | 39.06  | -0.22 | -0.22 | -0.24 |
| Nicaragua                        | 72.44    | 81.51    | 63.24    | 126.03   | 132.86   | 119.01 | 2.10  | 1.95  | 2.31  |
| Niger                            | 114.35   | 161.36   | 65.76    | 98.69    | 136.15   | 61.84  | 1.01  | 0.96  | 1.18  |
| Nigeria                          | 138.9    | 197.03   | 81.94    | 77.99    | 103.19   | 53.72  | 0.02  | -0.03 | 0.17  |
| North Korea                      | 248.82   | 304.56   | 189.78   | 354.63   | 401.67   | 305.48 | 0.51  | 0.46  | 0.65  |
| Northern Mariana Islands         | 78.62    | 97.87    | 61.33    | 48.49    | 46.34    | 50.66  | -0.23 | -0.36 | -0.03 |
| Norway                           | 56.16    | 61       | 51.21    | 34.02    | 41.09    | 27.04  | -0.21 | -0.18 | -0.27 |
| Oman                             | 33.17    | 54.04    | 16.53    | 37.16    | 53.05    | 29.1   | 0.91  | 0.78  | 1.95  |
| Pakistan                         | 270.45   | 195.82   | 339.72   | 245.57   | 174.76   | 312.59 | 0.37  | 0.41  | 0.32  |
| Palestine                        | 110.08   | 117.6    | 102.74   | 142.41   | 128.97   | 155.48 | 0.96  | 0.75  | 1.21  |
| Panama                           | 73.18    | 75.38    | 71.02    | 87.71    | 87.49    | 87.93  | 0.27  | 0.24  | 0.30  |
| Papua New Guinea                 | 399.61   | 416.49   | 383.5    | 316.52   | 338.67   | 295.23 | 0.08  | 0.09  | 0.07  |
| Paraguay                         | 82.86    | 88.67    | 77.18    | 178.52   | 173.95   | 182.95 | 1.30  | 1.22  | 1.42  |
| Peru                             | 52.45    | 64.74    | 40.16    | 41.44    | 48.88    | 33.99  | 0.63  | 0.52  | 0.78  |
| Philippines                      | 199.26   | 157.02   | 240.63   | 357.98   | 301.9    | 413.02 | 1.48  | 1.66  | 1.37  |
| Poland                           | 182.86   | 193.96   | 171.19   | 150.47   | 137.3    | 164.66 | -0.05 | -0.20 | 0.12  |
| Portugal                         | 98.65    | 118.26   | 77.55    | 98.75    | 114.92   | 81.51  | 0.20  | 0.13  | 0.30  |
| Puerto Rico                      | 198.1    | 180.05   | 217.29   | 308.07   | 275.56   | 343.18 | 0.67  | 0.50  | 0.83  |
| Qatar                            | 35.2     | 53.26    | 26.29    | 13.53    | 22.81    | 10.06  | -0.47 | -0.42 | -0.47 |
| Romania                          | 458.2    | 516.09   | 398.66   | 736.15   | 745.51   | 726.18 | 0.68  | 0.54  | 0.88  |
| Russia                           | 91.63    | 97.23    | 85.26    | 237.5    | 225.25   | 251.89 | 1.41  | 1.25  | 1.63  |
| Rwanda                           | 514.78   | 687.05   | 336.4    | 277.24   | 350.19   | 197.89 | 0.26  | 0.19  | 0.34  |
| Saint Lucia                      | 398.94   | 458.96   | 337.12   | 314.36   | 346      | 281.52 | -0.07 | -0.11 | -0.01 |
| Saint Vincent and the Grenadines | 434.79   | 513.64   | 355.16   | 483.24   | 488.45   | 478.13 | 0.12  | 0.03  | 0.29  |
| Samoa                            | 270.68   | 233.95   | 304.53   | 219.28   | 222.34   | 216.4  | -0.05 | -0.03 | -0.07 |
| Sao Tome and Principe            | 73.12    | 101.49   | 44.22    | 68.49    | 96.11    | 40.65  | 0.67  | 0.65  | 0.64  |
| Saudi Arabia                     | 23.29    | 37.14    | 12.39    | 25.93    | 36.24    | 18.01  | 0.95  | 0.85  | 1.41  |
| Senegal                          | 130.43   | 181.39   | 78.99    | 129.11   | 185.3    | 70.87  | 0.92  | 0.94  | 0.72  |
| Serbia                           | 178.48   | 198.15   | 158.28   | 251.6    | 281.94   | 219.77 | 0.38  | 0.37  | 0.37  |
| Seychelles                       | 1,411.24 | 1,547.78 | 1,274.12 | 1,095.12 | 1,247.63 | 946.64 | -0.14 | -0.14 | -0.15 |
| Sierra Leone                     | 124.96   | 149.03   | 100.39   | 147.44   | 206.74   | 86.92  | 1.11  | 1.37  | 0.60  |
| Singapore                        | 164.77   | 162.8    | 166.69   | 223.59   | 176.02   | 272.86 | 0.57  | 0.21  | 0.94  |
| Slovakia                         | 118.36   | 120.94   | 115.66   | 217.57   | 210.62   | 224.91 | 1.20  | 0.96  | 1.44  |
| Slovenia                         | 260.37   | 303.26   | 214.88   | 261.72   | 300.19   | 222.56 | 0.18  | 0.11  | 0.26  |
| Solomon Islands                  | 406.48   | 373.64   | 437.58   | 348.2    | 314.74   | 380.62 | 0.12  | 0.08  | 0.14  |
| Somalia                          | 473.7    | 603.22   | 341.86   | 340.84   | 441.98   | 238.77 | 0.07  | 0.09  | 0.03  |
| South Africa                     | 394.45   | 524.25   | 261.63   | 413.89   | 498.44   | 326.35 | 0.00  | -0.09 | 0.18  |
| South Korea                      | 151.24   | 168.79   | 133.78   | 90.06    | 114.06   | 65.76  | -0.31 | -0.24 | -0.42 |
| South Sudan                      | 422.1    | 527.25   | 315.96   | 346.03   | 436.17   | 256.15 | 0.30  | 0.31  | 0.29  |
| Spain                            | 62.6     | 80.17    | 44.28    | 86.11    | 108.2    | 63.44  | 0.64  | 0.51  | 0.81  |
| Sri Lanka                        | 114.18   | 83.6     | 144.17   | 181.11   | 157.7    | 206.29 | 1.23  | 1.52  | 1.05  |

|                               |          |          |          |           |          |           |       |       |       |
|-------------------------------|----------|----------|----------|-----------|----------|-----------|-------|-------|-------|
| Sudan                         | 226.11   | 318.45   | 134.51   | 152.86    | 217.51   | 88.69     | 0.31  | 0.35  | 0.26  |
| Suriname                      | 290.42   | 335      | 247.27   | 254.15    | 276.85   | 231.54    | 0.00  | -0.01 | 0.03  |
| Swaziland                     | 368.33   | 441.06   | 286.98   | 457.68    | 563.05   | 350.1     | -0.10 | -0.12 | -0.10 |
| Sweden                        | 45.8     | 51.08    | 40.4     | 73.06     | 85.11    | 60.98     | 0.92  | 0.91  | 0.89  |
| Switzerland                   | 102.01   | 121.71   | 81.39    | 138.24    | 167.15   | 108.68    | 0.68  | 0.61  | 0.75  |
| Syria                         | 57.84    | 58.35    | 57.34    | 45.76     | 50.21    | 41.42     | -0.34 | -0.07 | -0.50 |
| Taiwan                        | 150.66   | 112.28   | 186.29   | 179.87    | 146.43   | 213.42    | 0.18  | 0.25  | 0.15  |
| Tajikistan                    | 148.14   | 172.25   | 123.74   | 126.75    | 132.78   | 120.86    | 0.67  | 0.55  | 0.87  |
| Tanzania                      | 279.85   | 341.09   | 217.53   | 229.47    | 272.73   | 185.68    | 0.55  | 0.50  | 0.58  |
| Thailand                      | 106.81   | 91.81    | 122.1    | 82.51     | 81.13    | 83.94     | -0.25 | -0.10 | -0.36 |
| The Bahamas                   | 598.81   | 608.96   | 588.52   | 800.15    | 822.82   | 776.5     | 0.47  | 0.43  | 0.49  |
| The Gambia                    | 111.53   | 156.65   | 67.06    | 84.12     | 109.95   | 57.79     | 0.41  | 0.39  | 0.53  |
| Timor-Leste                   | 175.19   | 207.3    | 143.89   | 138.69    | 175.36   | 103.16    | 1.06  | 1.24  | 0.84  |
| Togo                          | 151.01   | 212.37   | 88.05    | 127.34    | 155.08   | 98.94     | 0.27  | 0.16  | 0.59  |
| Tonga                         | 110.9    | 111.78   | 110.04   | 113.79    | 104.07   | 123.45    | 0.13  | 0.08  | 0.18  |
| Trinidad and Tobago           | 426.72   | 447.84   | 405.44   | 374.12    | 342.25   | 406.83    | -0.17 | -0.23 | -0.09 |
| Tunisia                       | 102.71   | 123.14   | 82.53    | 73.46     | 86.94    | 59.65     | -0.04 | -0.01 | -0.07 |
| Turkey                        | 179.41   | 188.92   | 169.66   | 137.58    | 149.12   | 125.63    | 0.46  | 0.48  | 0.42  |
| Turkmenistan                  | 174.45   | 188.71   | 159.78   | 211.51    | 206.01   | 217.19    | 1.03  | 0.94  | 1.17  |
| Uganda                        | 402.67   | 524.59   | 279.14   | 269.07    | 299.87   | 238.23    | 0.35  | 0.18  | 0.67  |
| Ukraine                       | 139.68   | 143.47   | 135.26   | 256.98    | 248.6    | 266.87    | 0.70  | 0.67  | 0.76  |
| United Arab Emirates          | 100.64   | 128.92   | 85.96    | 77.5      | 91.88    | 72.26     | -0.04 | 0.02  | 0.02  |
| United Kingdom                | 82.07    | 80.35    | 83.88    | 73.23     | 66.94    | 79.69     | 0.10  | 0.00  | 0.21  |
| United States                 | 183.45   | 175.08   | 192.26   | 216.2     | 180.49   | 253.12    | 0.27  | 0.06  | 0.48  |
| Uruguay                       | 154.46   | 148.77   | 160.49   | 184.08    | 192.72   | 174.82    | 0.34  | 0.39  | 0.26  |
| Uzbekistan                    | 677.84   | 626.7    | 730.12   | 748.1     | 658.49   | 840.67    | 0.48  | 0.47  | 0.49  |
| Vanuatu                       | 427.89   | 402.02   | 452.35   | 372.4     | 371.62   | 373.17    | -0.01 | 0.03  | -0.04 |
| Venezuela                     | 234.43   | 241.18   | 227.8    | 223.99    | 210.2    | 237.9     | -0.07 | -0.07 | -0.06 |
| Vietnam                       | 186.8    | 200.59   | 172.59   | 190.51    | 194.18   | 186.77    | 0.48  | 0.48  | 0.49  |
| Virgin Islands, U.S.          | 329.17   | 291.64   | 368.91   | 620.41    | 527.72   | 722.27    | 0.41  | 0.41  | 0.41  |
| Yemen                         | 195.1    | 267.69   | 121.18   | 142.57    | 199.72   | 86.6      | 0.54  | 0.60  | 0.49  |
| Zambia                        | 258.32   | 368.29   | 146.5    | 279.67    | 305.34   | 253.92    | 0.81  | 0.44  | 1.76  |
| Zimbabwe                      | 94.38    | 114.8    | 73.8     | 99.35     | 99.97    | 98.7      | -0.08 | -0.25 | 0.16  |
| <b>Ischemic heart disease</b> |          |          |          |           |          |           |       |       |       |
| Afghanistan                   | 4,618.47 | 4,859.57 | 4,388.95 | 4,620.05  | 4,688.19 | 4,556.08  | 0.65  | 0.65  | 0.64  |
| Albania                       | 1,804.86 | 1,208.86 | 2,372.50 | 3,289.09  | 2,217.35 | 4,378.09  | 1.05  | 1.12  | 1.01  |
| Algeria                       | 1,439.53 | 1,295.79 | 1,579.74 | 1,670.22  | 1,490.80 | 1,847.17  | 0.66  | 0.63  | 0.69  |
| American Samoa                | 1,622.88 | 721.4    | 2,476.20 | 1,627.90  | 1,177.04 | 2,076.43  | 0.22  | 0.72  | 0.13  |
| Andorra                       | 1,797.69 | 1,095.68 | 2,537.90 | 1,559.27  | 858.52   | 2,289.43  | -0.13 | -0.20 | -0.11 |
| Angola                        | 1,378.51 | 1,192.37 | 1,569.24 | 1,026.38  | 1,035.44 | 1,017.20  | 0.50  | 0.67  | 0.35  |
| Antigua and Barbuda           | 1,992.37 | 1,708.39 | 2,296.12 | 1,557.22  | 1,278.89 | 1,860.76  | -0.13 | -0.18 | -0.09 |
| Argentina                     | 2,772.24 | 1,927.09 | 3,650.69 | 2,063.88  | 1,575.73 | 2,573.29  | -0.12 | -0.07 | -0.13 |
| Armenia                       | 3,922.61 | 3,048.91 | 4,848.63 | 5,038.82  | 3,654.92 | 6,632.81  | 0.43  | 0.35  | 0.50  |
| Australia                     | 3,114.46 | 2,272.87 | 3,960.62 | 1,509.23  | 1,111.66 | 1,907.83  | -0.44 | -0.46 | -0.42 |
| Austria                       | 3,944.62 | 3,201.41 | 4,754.41 | 2,442.58  | 1,971.01 | 2,937.55  | -0.26 | -0.28 | -0.25 |
| Azerbaijan                    | 4,533.24 | 3,667.70 | 5,436.40 | 4,530.12  | 3,299.54 | 5,775.17  | 0.50  | 0.37  | 0.59  |
| Bahrain                       | 2,590.58 | 1,925.61 | 3,079.62 | 1,125.57  | 817.86   | 1,313.99  | -0.37 | -0.41 | -0.37 |
| Bangladesh                    | 757.91   | 742.36   | 772.77   | 2,033.94  | 1,476.49 | 2,580.66  | 5.24  | 3.99  | 6.23  |
| Barbados                      | 2,353.65 | 1,962.59 | 2,775.05 | 2,083.20  | 1,787.96 | 2,404.08  | -0.16 | -0.16 | -0.16 |
| Belarus                       | 6,761.24 | 5,876.41 | 7,763.42 | 10,081.15 | 7,935.42 | 12,570.26 | 0.28  | 0.27  | 0.30  |
| Belgium                       | 3,548.65 | 2,736.65 | 4,398.27 | 1,973.78  | 1,469.58 | 2,497.86  | -0.37 | -0.40 | -0.34 |
| Belize                        | 1,467.34 | 1,217.97 | 1,712.52 | 1,242.68  | 905.74   | 1,581.63  | 0.01  | -0.06 | 0.05  |
| Benin                         | 935.2    | 853.57   | 1,022.06 | 1,193.06  | 972.39   | 1,414.60  | 1.42  | 1.14  | 1.59  |
| Bermuda                       | 3,769.80 | 2,291.94 | 5,266.34 | 1,831.06  | 1,120.02 | 2,555.72  | -0.38 | -0.41 | -0.36 |
| Bhutan                        | 1,663.56 | 1,606.65 | 1,716.44 | 1,737.13  | 1,322.17 | 2,094.38  | 1.34  | 1.01  | 1.54  |
| Bolivia                       | 1,407.74 | 1,391.86 | 1,423.51 | 1,278.24  | 1,259.11 | 1,297.30  | 0.96  | 0.96  | 0.96  |
| Bosnia and Herzegovina        | 3,243.89 | 2,465.13 | 4,023.50 | 2,793.71  | 2,094.99 | 3,498.89  | -0.12 | -0.17 | -0.09 |
| Botswana                      | 1,016.06 | 915.14   | 1,119.38 | 1,555.26  | 1,240.87 | 1,869.94  | 0.17  | 0.06  | 0.26  |
| Brazil                        | 1,927.27 | 1,471.31 | 2,390.42 | 1,871.07  | 1,419.13 | 2,338.12  | 0.22  | 0.21  | 0.23  |
| Brunei                        | 1,119.28 | 711.35   | 1,484.39 | 1,287.54  | 794.38   | 1,751.59  | 0.17  | 0.13  | 0.21  |
| Bulgaria                      | 6,553.84 | 5,062.74 | 8,086.92 | 6,819.12  | 5,335.33 | 8,376.35  | 0.02  | 0.01  | 0.03  |

|                                  |          |          |          |          |          |          |       |       |       |
|----------------------------------|----------|----------|----------|----------|----------|----------|-------|-------|-------|
| Burkina Faso                     | 892.88   | 821.41   | 967.68   | 946.16   | 910.22   | 982.56   | 0.97  | 1.00  | 0.90  |
| Burundi                          | 1,471.34 | 1,245.29 | 1,705.32 | 727.41   | 619.59   | 837.57   | 0.11  | 0.13  | 0.08  |
| Cambodia                         | 2,257.21 | 1,988.87 | 2,544.71 | 2,016.33 | 1,580.80 | 2,473.70 | 1.18  | 1.00  | 1.31  |
| Cameroon                         | 907.33   | 894.96   | 919.85   | 1,006.48 | 826.51   | 1,186.34 | 0.47  | 0.22  | 0.68  |
| Canada                           | 2,921.01 | 2,008.03 | 3,849.69 | 1,833.35 | 1,302.74 | 2,371.42 | -0.34 | -0.35 | -0.33 |
| Cape Verde                       | 839.77   | 607.06   | 1,097.12 | 1,028.32 | 931.68   | 1,127.54 | 0.89  | 1.40  | 0.58  |
| Central African Republic         | 1,686.45 | 1,336.91 | 2,047.84 | 1,754.00 | 1,268.21 | 2,252.73 | 0.26  | 0.11  | 0.32  |
| Chad                             | 690.94   | 643.97   | 738.59   | 801.92   | 652.34   | 951.14   | 0.69  | 0.45  | 0.84  |
| Chile                            | 1,611.99 | 1,260.15 | 1,973.38 | 1,214.61 | 876.02   | 1,562.25 | -0.13 | -0.25 | -0.04 |
| China                            | 1,190.69 | 1,027.08 | 1,345.89 | 1,862.36 | 1,356.14 | 2,339.20 | 1.32  | 1.15  | 1.41  |
| Colombia                         | 1,390.38 | 1,145.61 | 1,638.32 | 1,324.63 | 1,049.10 | 1,608.67 | 0.27  | 0.13  | 0.39  |
| Comoros                          | 1,095.00 | 778.21   | 1,409.75 | 679.86   | 555.55   | 801.93   | 0.34  | 0.55  | 0.23  |
| Congo                            | 2,032.51 | 1,893.08 | 2,172.66 | 1,386.03 | 1,646.00 | 1,126.46 | -0.03 | 0.09  | -0.18 |
| Costa Rica                       | 1,275.11 | 999.12   | 1,546.68 | 1,264.10 | 934.39   | 1,593.36 | 0.04  | -0.03 | 0.09  |
| Cote d'Ivoire                    | 1,231.84 | 933.13   | 1,507.07 | 1,241.58 | 928.24   | 1,544.25 | 0.42  | 0.41  | 0.40  |
| Croatia                          | 4,604.96 | 3,577.26 | 5,697.04 | 4,322.89 | 3,750.11 | 4,937.60 | 0.01  | 0.08  | -0.03 |
| Cuba                             | 3,206.92 | 2,570.70 | 3,833.59 | 3,022.53 | 2,406.46 | 3,632.76 | -0.10 | -0.11 | -0.09 |
| Cyprus                           | 3,198.35 | 1,964.70 | 4,463.45 | 1,838.65 | 873.62   | 2,870.27 | -0.33 | -0.48 | -0.26 |
| Czech Republic                   | 6,741.05 | 5,193.57 | 8,381.40 | 4,124.57 | 3,367.29 | 4,906.22 | -0.24 | -0.22 | -0.25 |
| Democratic Republic of the Congo | 797.98   | 768.67   | 828      | 777.6    | 655.38   | 900.45   | 0.59  | 0.38  | 0.77  |
| Denmark                          | 4,849.09 | 3,631.53 | 6,102.17 | 1,831.10 | 1,333.28 | 2,336.86 | -0.53 | -0.56 | -0.52 |
| Djibouti                         | 939.81   | 521.34   | 1,353.34 | 1,323.38 | 814.59   | 1,827.64 | 0.92  | 1.16  | 0.79  |
| Dominica                         | 1,736.84 | 1,660.61 | 1,813.63 | 1,784.51 | 1,448.67 | 2,125.68 | -0.07 | -0.14 | -0.02 |
| Dominican Republic               | 1,356.04 | 1,092.74 | 1,615.83 | 2,082.06 | 1,741.98 | 2,424.38 | 1.07  | 1.19  | 0.99  |
| Ecuador                          | 1,079.91 | 878.21   | 1,279.39 | 1,140.13 | 846.86   | 1,433.46 | 0.48  | 0.38  | 0.54  |
| Egypt                            | 2,945.12 | 2,541.22 | 3,346.24 | 2,911.82 | 2,203.88 | 3,605.12 | 0.71  | 0.57  | 0.80  |
| El Salvador                      | 1,545.16 | 1,346.41 | 1,753.27 | 1,676.39 | 1,447.44 | 1,935.19 | 0.61  | 0.59  | 0.63  |
| Equatorial Guinea                | 2,146.47 | 1,902.84 | 2,379.59 | 1,108.28 | 1,024.30 | 1,188.16 | -0.02 | 0.01  | -0.04 |
| Eritrea                          | 812.12   | 584.33   | 1,042.79 | 899.91   | 801.96   | 997.51   | 0.94  | 1.31  | 0.68  |
| Estonia                          | 7,187.94 | 5,977.62 | 8,565.24 | 4,651.63 | 4,133.50 | 5,260.00 | -0.17 | -0.18 | -0.17 |
| Ethiopia                         | 1,801.57 | 1,521.96 | 2,082.96 | 1,072.59 | 891.38   | 1,254.41 | 0.86  | 0.79  | 0.88  |
| Federated States of Micronesia   | 2,466.42 | 1,651.33 | 3,246.67 | 2,955.19 | 1,980.44 | 3,883.58 | 0.61  | 0.60  | 0.61  |
| Fiji                             | 3,321.30 | 1,391.17 | 5,191.57 | 4,476.43 | 2,419.23 | 6,465.53 | 0.17  | 0.46  | 0.12  |
| Finland                          | 5,137.81 | 3,666.57 | 6,698.69 | 2,841.95 | 1,969.71 | 3,740.97 | -0.37 | -0.40 | -0.34 |
| France                           | 1,980.95 | 1,411.98 | 2,580.91 | 1,424.43 | 988.02   | 1,889.08 | -0.20 | -0.25 | -0.17 |
| Gabon                            | 2,046.99 | 1,691.11 | 2,417.71 | 1,203.82 | 1,152.11 | 1,254.38 | -0.12 | -0.01 | -0.21 |
| Georgia                          | 6,762.58 | 5,616.82 | 8,026.28 | 6,278.40 | 4,394.77 | 8,338.74 | -0.06 | -0.16 | 0.00  |
| Germany                          | 4,941.08 | 4,069.38 | 5,877.62 | 2,866.08 | 2,226.93 | 3,526.92 | -0.35 | -0.38 | -0.32 |
| Ghana                            | 1,075.86 | 1,329.23 | 830.5    | 1,254.45 | 1,261.62 | 1,247.22 | 0.96  | 0.65  | 1.39  |
| Greece                           | 3,479.25 | 2,475.50 | 4,508.80 | 3,432.29 | 2,616.33 | 4,288.66 | 0.00  | 0.06  | -0.03 |
| Greenland                        | 2,017.65 | 1,181.86 | 2,740.98 | 1,729.95 | 896.78   | 2,452.34 | 0.20  | 0.08  | 0.23  |
| Grenada                          | 2,622.80 | 2,338.19 | 2,914.87 | 1,992.38 | 1,684.71 | 2,298.16 | -0.17 | -0.19 | -0.15 |
| Guam                             | 2,054.30 | 1,258.61 | 2,749.33 | 4,671.27 | 3,314.64 | 5,989.86 | 0.69  | 0.94  | 0.60  |
| Guatemala                        | 1,052.86 | 958.64   | 1,148.44 | 922.33   | 839.41   | 1,008.88 | 0.61  | 0.66  | 0.56  |
| Guinea                           | 997.12   | 1,096.51 | 895.51   | 1,171.44 | 1,041.02 | 1,301.24 | 1.20  | 0.81  | 1.65  |
| Guinea-Bissau                    | 1,331.68 | 1,324.46 | 1,339.08 | 1,507.69 | 1,446.88 | 1,569.26 | 0.66  | 0.58  | 0.74  |
| Guyana                           | 2,435.14 | 1,768.97 | 3,122.88 | 3,127.40 | 2,350.32 | 3,897.00 | 0.46  | 0.54  | 0.40  |
| Haiti                            | 2,986.78 | 3,052.02 | 2,919.63 | 2,193.59 | 2,149.48 | 2,238.67 | 0.41  | 0.33  | 0.50  |
| Honduras                         | 1,796.04 | 1,650.83 | 1,940.23 | 2,048.50 | 1,895.35 | 2,201.65 | 0.79  | 0.74  | 0.83  |
| Hungary                          | 6,655.48 | 4,992.89 | 8,453.97 | 4,691.24 | 4,022.93 | 5,427.96 | -0.10 | -0.04 | -0.13 |
| Iceland                          | 2,839.83 | 1,933.13 | 3,738.57 | 1,596.59 | 867.8    | 2,341.00 | -0.35 | -0.47 | -0.28 |
| India                            | 2,302.12 | 1,724.74 | 2,839.86 | 2,803.30 | 1,865.57 | 3,674.72 | 1.09  | 1.03  | 1.05  |
| Indonesia                        | 1,607.04 | 1,407.08 | 1,805.30 | 2,166.96 | 1,590.84 | 2,734.77 | 1.08  | 0.81  | 1.26  |
| Iran                             | 2,271.86 | 1,719.49 | 2,804.16 | 2,653.37 | 1,749.96 | 3,543.27 | 1.23  | 1.07  | 1.29  |
| Iraq                             | 3,107.46 | 2,819.41 | 3,390.26 | 2,804.98 | 2,280.92 | 3,316.09 | 0.12  | 0.09  | 0.14  |
| Ireland                          | 3,488.57 | 2,470.34 | 4,515.83 | 1,623.01 | 968.12   | 2,297.30 | -0.43 | -0.52 | -0.38 |
| Israel                           | 2,740.02 | 2,171.44 | 3,310.67 | 1,031.98 | 734.68   | 1,334.31 | -0.55 | -0.60 | -0.51 |
| Italy                            | 2,765.54 | 1,981.50 | 3,597.43 | 2,046.41 | 1,583.46 | 2,538.63 | -0.19 | -0.17 | -0.18 |
| Jamaica                          | 1,252.84 | 1,133.78 | 1,374.96 | 1,312.36 | 1,152.39 | 1,473.59 | 0.00  | 0.00  | -0.02 |
| Japan                            | 1,453.03 | 1,124.69 | 1,793.20 | 1,486.90 | 1,137.04 | 1,855.36 | -0.09 | -0.09 | -0.10 |
| Jordan                           | 1,759.12 | 1,387.96 | 2,094.98 | 1,094.78 | 608.61   | 1,557.45 | -0.06 | -0.32 | 0.09  |

|                                  |          |          |          |          |          |          |       |       |       |
|----------------------------------|----------|----------|----------|----------|----------|----------|-------|-------|-------|
| Kazakhstan                       | 3,958.58 | 3,276.48 | 4,683.44 | 4,644.90 | 3,398.35 | 5,980.55 | 0.28  | 0.18  | 0.34  |
| Kenya                            | 350.33   | 253.43   | 447.9    | 429      | 288.78   | 569.19   | 0.70  | 0.61  | 0.73  |
| Kiribati                         | 2,438.58 | 1,717.62 | 3,174.57 | 2,682.89 | 1,544.29 | 3,850.83 | 0.56  | 0.38  | 0.60  |
| Kuwait                           | 1,319.01 | 689.92   | 1,869.27 | 1,292.32 | 484.33   | 1,922.91 | 0.21  | -0.18 | 0.33  |
| Kyrgyzstan                       | 3,093.77 | 2,709.23 | 3,494.83 | 3,448.45 | 2,622.06 | 4,292.42 | 0.57  | 0.44  | 0.67  |
| Laos                             | 2,942.81 | 2,858.82 | 3,026.91 | 1,990.68 | 1,618.65 | 2,366.41 | 0.88  | 0.64  | 1.09  |
| Latvia                           | 7,494.18 | 6,132.11 | 9,063.06 | 6,107.30 | 5,024.88 | 7,367.92 | -0.05 | -0.08 | -0.03 |
| Lebanon                          | 4,075.06 | 2,607.15 | 5,583.37 | 2,462.62 | 1,811.35 | 3,107.32 | 0.05  | 0.07  | 0.07  |
| Lesotho                          | 1,116.29 | 859.21   | 1,388.51 | 2,042.31 | 1,749.75 | 2,340.82 | 0.14  | 0.22  | 0.08  |
| Liberia                          | 850.34   | 889.11   | 811.35   | 877.62   | 927.32   | 828.73   | 1.67  | 1.53  | 1.77  |
| Libya                            | 1,491.81 | 1,296.56 | 1,666.67 | 1,944.56 | 1,579.36 | 2,305.43 | 0.38  | 0.42  | 0.35  |
| Lithuania                        | 6,527.25 | 5,339.43 | 7,849.23 | 6,050.53 | 4,799.22 | 7,505.78 | -0.07 | -0.09 | -0.05 |
| Luxembourg                       | 3,493.91 | 2,556.05 | 4,470.09 | 1,375.63 | 1,018.26 | 1,734.44 | -0.44 | -0.47 | -0.41 |
| Macedonia                        | 2,988.79 | 2,061.66 | 3,905.05 | 3,277.41 | 2,339.80 | 4,223.28 | 0.18  | 0.23  | 0.17  |
| Madagascar                       | 1,212.26 | 765.67   | 1,660.29 | 1,176.48 | 742.17   | 1,613.49 | 0.81  | 0.83  | 0.74  |
| Malawi                           | 880.86   | 953.46   | 805.72   | 718.59   | 604.97   | 832.63   | 0.76  | 0.40  | 1.16  |
| Malaysia                         | 1,870.57 | 1,363.06 | 2,363.08 | 2,266.45 | 1,313.72 | 3,236.88 | 0.28  | 0.10  | 0.36  |
| Maldives                         | 1,624.22 | 1,287.54 | 1,943.95 | 1,040.76 | 600.21   | 1,478.87 | 0.72  | 0.31  | 0.95  |
| Mali                             | 1,080.00 | 1,302.28 | 852.9    | 728.03   | 868.01   | 590.82   | 0.19  | 0.16  | 0.23  |
| Malta                            | 3,176.37 | 2,263.79 | 4,121.44 | 2,450.66 | 1,739.67 | 3,167.40 | -0.23 | -0.23 | -0.23 |
| Marshall Islands                 | 2,099.93 | 1,214.19 | 2,946.99 | 2,974.61 | 1,842.30 | 4,068.07 | 0.70  | 0.79  | 0.68  |
| Mauritania                       | 1,122.15 | 1,082.52 | 1,162.02 | 764.38   | 775.03   | 753.88   | 0.24  | 0.26  | 0.20  |
| Mauritius                        | 3,829.20 | 2,618.67 | 5,044.68 | 2,879.69 | 1,994.23 | 3,787.00 | -0.26 | -0.27 | -0.25 |
| Mexico                           | 922.05   | 738.87   | 1,107.14 | 1,292.73 | 1,020.30 | 1,567.93 | 0.85  | 0.77  | 0.91  |
| Moldova                          | 5,433.61 | 5,173.01 | 5,719.53 | 5,342.00 | 4,607.94 | 6,135.61 | 0.19  | 0.11  | 0.28  |
| Mongolia                         | 2,770.63 | 2,530.37 | 3,016.59 | 3,343.76 | 2,313.00 | 4,395.43 | 0.77  | 0.56  | 0.90  |
| Montenegro                       | 2,810.56 | 1,976.64 | 3,651.76 | 3,702.02 | 2,431.34 | 5,002.95 | 0.27  | 0.23  | 0.29  |
| Morocco                          | 1,475.21 | 1,379.56 | 1,571.23 | 1,663.65 | 1,518.03 | 1,812.66 | 0.69  | 0.64  | 0.73  |
| Mozambique                       | 732.33   | 622.93   | 851.6    | 930.72   | 734.06   | 1,136.43 | 1.31  | 1.09  | 1.42  |
| Myanmar                          | 1,103.84 | 973.19   | 1,239.81 | 1,132.06 | 827.68   | 1,450.38 | 0.80  | 0.60  | 0.93  |
| Namibia                          | 1,390.06 | 1,132.86 | 1,658.44 | 1,077.26 | 845.76   | 1,321.13 | -0.10 | -0.12 | -0.10 |
| Nepal                            | 1,747.51 | 1,714.30 | 1,781.22 | 1,918.55 | 1,571.21 | 2,287.91 | 1.51  | 1.25  | 1.73  |
| Netherlands                      | 3,207.52 | 2,127.82 | 4,311.72 | 1,597.83 | 1,075.75 | 2,128.63 | -0.46 | -0.47 | -0.45 |
| New Zealand                      | 3,479.05 | 2,392.63 | 4,598.79 | 1,757.74 | 1,240.43 | 2,294.84 | -0.39 | -0.41 | -0.37 |
| Nicaragua                        | 672.96   | 579.7    | 767.65   | 1,008.82 | 870.92   | 1,150.65 | 1.67  | 1.72  | 1.64  |
| Niger                            | 707.12   | 631.13   | 785.67   | 750.15   | 601.71   | 896.17   | 1.47  | 1.21  | 1.64  |
| Nigeria                          | 733.92   | 750.2    | 717.96   | 502.41   | 400.62   | 600.42   | 0.24  | -0.01 | 0.50  |
| North Korea                      | 1,246.69 | 1,119.30 | 1,381.60 | 2,195.29 | 1,849.79 | 2,556.36 | 0.87  | 0.83  | 0.90  |
| Northern Mariana Islands         | 975.41   | 660.58   | 1,258.37 | 888.16   | 450.36   | 1,329.07 | 0.14  | -0.08 | 0.24  |
| Norway                           | 4,513.24 | 2,958.65 | 6,102.93 | 1,618.16 | 1,180.99 | 2,050.25 | -0.53 | -0.51 | -0.53 |
| Oman                             | 1,295.03 | 1,190.80 | 1,378.17 | 1,165.74 | 866.88   | 1,317.27 | 0.53  | 0.32  | 0.60  |
| Pakistan                         | 2,652.53 | 2,259.89 | 3,016.91 | 3,377.49 | 2,713.36 | 4,006.20 | 0.92  | 0.90  | 0.91  |
| Palestine                        | 1,733.69 | 1,249.91 | 2,205.53 | 1,914.94 | 1,083.59 | 2,723.07 | 0.68  | 0.38  | 0.80  |
| Panama                           | 1,219.68 | 942.96   | 1,490.31 | 1,162.42 | 873.78   | 1,449.46 | 0.01  | -0.01 | 0.02  |
| Papua New Guinea                 | 2,264.66 | 1,616.65 | 2,883.15 | 2,960.40 | 2,318.62 | 3,577.05 | 0.79  | 0.93  | 0.73  |
| Paraguay                         | 1,213.14 | 1,064.12 | 1,358.76 | 1,556.23 | 1,161.68 | 1,938.91 | 0.37  | 0.23  | 0.45  |
| Peru                             | 1,130.86 | 968.38   | 1,293.39 | 784.58   | 642.99   | 926.38   | 0.43  | 0.34  | 0.51  |
| Philippines                      | 1,596.99 | 1,112.02 | 2,071.87 | 2,256.75 | 1,559.46 | 2,941.18 | 0.95  | 0.94  | 0.96  |
| Poland                           | 6,169.59 | 4,429.58 | 7,999.60 | 3,742.68 | 2,742.59 | 4,818.99 | -0.30 | -0.30 | -0.30 |
| Portugal                         | 2,717.42 | 2,100.95 | 3,380.42 | 1,576.77 | 1,231.13 | 1,945.35 | -0.30 | -0.32 | -0.29 |
| Puerto Rico                      | 2,828.92 | 2,124.45 | 3,577.92 | 2,099.50 | 1,727.97 | 2,500.86 | -0.20 | -0.21 | -0.19 |
| Qatar                            | 1,275.81 | 986.34   | 1,418.72 | 639.71   | 366.71   | 741.79   | -0.31 | -0.49 | -0.27 |
| Romania                          | 5,118.96 | 4,125.62 | 6,140.87 | 5,249.78 | 4,133.79 | 6,437.62 | 0.08  | 0.07  | 0.08  |
| Russia                           | 6,063.18 | 5,147.21 | 7,103.34 | 7,244.83 | 5,584.66 | 9,194.47 | 0.11  | 0.05  | 0.15  |
| Rwanda                           | 1,004.09 | 824.52   | 1,190.02 | 670.76   | 542.96   | 809.77   | 0.56  | 0.54  | 0.55  |
| Saint Lucia                      | 1,874.41 | 1,536.74 | 2,222.18 | 1,544.06 | 1,302.82 | 1,794.54 | -0.03 | 0.00  | -0.04 |
| Saint Vincent and the Grenadines | 2,071.94 | 2,056.07 | 2,087.97 | 2,453.90 | 2,140.98 | 2,761.06 | 0.20  | 0.12  | 0.27  |
| Samoa                            | 1,912.57 | 1,235.18 | 2,536.97 | 2,067.58 | 1,829.40 | 2,291.23 | 0.26  | 0.51  | 0.18  |
| Sao Tome and Principe            | 996.33   | 1,041.61 | 950.22   | 927.41   | 1,061.69 | 792.11   | 0.66  | 0.78  | 0.48  |
| Saudi Arabia                     | 1,164.25 | 1,011.64 | 1,284.28 | 1,233.25 | 746.8    | 1,606.95 | 0.85  | 0.40  | 1.07  |
| Senegal                          | 805.58   | 664.61   | 947.89   | 904.96   | 802.24   | 1,011.45 | 1.18  | 1.31  | 1.04  |

|                        |          |          |          |           |          |           |       |       |       |
|------------------------|----------|----------|----------|-----------|----------|-----------|-------|-------|-------|
| Serbia                 | 3,838.05 | 3,055.70 | 4,641.42 | 4,162.91  | 3,405.35 | 4,957.46  | 0.06  | 0.07  | 0.05  |
| Seychelles             | 2,587.18 | 1,730.71 | 3,447.35 | 2,026.47  | 1,388.76 | 2,647.29  | -0.13 | -0.14 | -0.12 |
| Sierra Leone           | 976.7    | 666.71   | 1,293.10 | 1,097.57  | 1,053.27 | 1,142.78  | 1.01  | 1.70  | 0.64  |
| Singapore              | 2,203.74 | 1,573.02 | 2,818.03 | 1,541.73  | 1,036.64 | 2,064.84  | -0.19 | -0.27 | -0.13 |
| Slovakia               | 6,334.81 | 4,821.72 | 7,919.39 | 4,039.46  | 3,332.76 | 4,785.16  | -0.24 | -0.22 | -0.24 |
| Slovenia               | 2,939.09 | 2,252.24 | 3,667.40 | 2,147.15  | 1,718.39 | 2,583.63  | -0.14 | -0.14 | -0.14 |
| Solomon Islands        | 2,722.73 | 1,908.26 | 3,493.92 | 3,238.88  | 2,310.80 | 4,138.27  | 0.55  | 0.56  | 0.56  |
| Somalia                | 1,151.45 | 899.33   | 1,408.07 | 991.9     | 830.72   | 1,154.58  | 0.28  | 0.37  | 0.22  |
| South Africa           | 1,398.24 | 1,531.65 | 1,261.73 | 1,542.31  | 1,410.85 | 1,678.42  | 0.05  | -0.12 | 0.26  |
| South Korea            | 1,714.90 | 1,407.51 | 2,020.93 | 850.33    | 680.79   | 1,021.92  | -0.43 | -0.45 | -0.41 |
| South Sudan            | 917.41   | 771.34   | 1,064.86 | 990.93    | 923.44   | 1,058.22  | 0.72  | 0.90  | 0.58  |
| Spain                  | 2,500.24 | 1,809.56 | 3,219.81 | 1,493.63  | 1,103.01 | 1,894.35  | -0.29 | -0.32 | -0.26 |
| Sri Lanka              | 2,398.88 | 1,463.53 | 3,316.20 | 2,223.68  | 1,459.81 | 3,044.80  | 0.30  | 0.33  | 0.32  |
| Sudan                  | 3,004.58 | 2,518.93 | 3,486.42 | 2,436.87  | 1,943.48 | 2,926.65  | 0.58  | 0.52  | 0.60  |
| Suriname               | 2,131.10 | 1,677.03 | 2,570.66 | 1,952.33  | 1,430.66 | 2,472.07  | 0.05  | 0.02  | 0.06  |
| Swaziland              | 985.66   | 830.56   | 1,159.11 | 1,731.10  | 1,479.17 | 1,988.34  | 0.28  | 0.24  | 0.27  |
| Sweden                 | 4,716.01 | 3,347.73 | 6,117.48 | 2,351.19  | 1,808.82 | 2,894.64  | -0.40 | -0.38 | -0.41 |
| Switzerland            | 2,923.19 | 2,126.13 | 3,757.92 | 1,578.23  | 1,154.40 | 2,011.61  | -0.33 | -0.36 | -0.30 |
| Syria                  | 2,716.11 | 2,251.02 | 3,166.28 | 2,515.96  | 1,951.20 | 3,066.94  | -0.23 | -0.06 | -0.32 |
| Taiwan                 | 1,362.12 | 807.25   | 1,877.19 | 1,230.14  | 839.75   | 1,621.85  | -0.11 | 0.00  | -0.14 |
| Tajikistan             | 2,547.56 | 2,317.52 | 2,780.34 | 2,107.96  | 1,643.69 | 2,561.43  | 0.62  | 0.42  | 0.77  |
| Tanzania               | 923      | 794.11   | 1,054.17 | 844.06    | 710.42   | 979.34    | 0.74  | 0.69  | 0.73  |
| Thailand               | 1,657.66 | 1,149.21 | 2,175.48 | 1,634.45  | 1,087.95 | 2,196.68  | -0.05 | -0.04 | -0.06 |
| The Bahamas            | 1,902.21 | 1,471.51 | 2,338.92 | 1,977.39  | 1,536.65 | 2,437.03  | 0.14  | 0.10  | 0.18  |
| The Gambia             | 790.77   | 765.73   | 815.45   | 669.45    | 552.69   | 788.52    | 0.58  | 0.43  | 0.71  |
| Timor-Leste            | 1,272.33 | 1,119.47 | 1,421.34 | 1,238.93  | 1,151.86 | 1,323.31  | 1.54  | 1.72  | 1.39  |
| Togo                   | 959.27   | 893.33   | 1,026.92 | 1,088.88  | 779.31   | 1,405.77  | 0.71  | 0.39  | 0.94  |
| Tonga                  | 1,701.24 | 1,137.34 | 2,251.45 | 2,056.55  | 1,204.59 | 2,903.88  | 0.33  | 0.23  | 0.36  |
| Trinidad and Tobago    | 3,028.29 | 2,447.79 | 3,613.08 | 3,262.41  | 2,381.88 | 4,166.34  | 0.02  | -0.03 | 0.05  |
| Tunisia                | 1,130.82 | 828.37   | 1,429.60 | 1,422.06  | 940.48   | 1,914.96  | 0.69  | 0.59  | 0.72  |
| Turkey                 | 3,153.46 | 1,958.37 | 4,377.88 | 1,513.60  | 982.58   | 2,063.40  | -0.09 | -0.06 | -0.10 |
| Turkmenistan           | 3,789.00 | 3,216.60 | 4,377.44 | 4,099.27  | 3,051.09 | 5,183.24  | 0.81  | 0.68  | 0.89  |
| Uganda                 | 558.6    | 480.12   | 638.1    | 592.88    | 423.58   | 762.33    | 1.15  | 0.82  | 1.34  |
| Ukraine                | 7,221.78 | 6,673.97 | 7,859.26 | 10,674.89 | 9,261.36 | 12,344.46 | 0.37  | 0.34  | 0.40  |
| United Arab Emirates   | 1,625.77 | 949.23   | 1,977.15 | 1,952.15  | 653.27   | 2,425.56  | 0.50  | -0.02 | 0.49  |
| United Kingdom         | 4,916.01 | 3,531.15 | 6,380.87 | 2,015.25  | 1,389.56 | 2,656.58  | -0.49 | -0.53 | -0.47 |
| United States          | 3,665.36 | 2,780.01 | 4,596.46 | 2,406.44  | 1,804.85 | 3,028.37  | -0.29 | -0.33 | -0.26 |
| Uruguay                | 3,307.22 | 2,376.18 | 4,295.61 | 1,940.25  | 1,468.92 | 2,445.17  | -0.34 | -0.33 | -0.34 |
| Uzbekistan             | 2,973.84 | 2,707.12 | 3,246.45 | 3,486.08  | 2,785.58 | 4,209.58  | 0.57  | 0.44  | 0.68  |
| Vanuatu                | 3,015.43 | 1,840.00 | 4,126.88 | 3,642.00  | 2,460.57 | 4,794.13  | 0.38  | 0.49  | 0.35  |
| Venezuela              | 1,646.03 | 1,266.51 | 2,019.62 | 1,912.57  | 1,293.64 | 2,536.77  | 0.13  | 0.09  | 0.13  |
| Vietnam                | 1,129.28 | 1,094.36 | 1,165.28 | 1,204.76  | 1,011.69 | 1,401.98  | 0.55  | 0.42  | 0.66  |
| Virgin Islands, U.S.   | 2,701.30 | 2,045.63 | 3,395.81 | 4,599.15  | 3,310.31 | 6,015.73  | 0.27  | 0.26  | 0.28  |
| Yemen                  | 3,166.43 | 3,171.16 | 3,161.62 | 2,688.71  | 2,520.45 | 2,853.51  | 0.79  | 0.70  | 0.88  |
| Zambia                 | 859.29   | 972.65   | 744.01   | 1,313.28  | 986.45   | 1,641.03  | 1.56  | 0.77  | 2.52  |
| Zimbabwe               | 590.52   | 691.72   | 488.47   | 704.16    | 673.61   | 735.6     | 0.04  | -0.16 | 0.31  |
| <b>Ischemic stroke</b> |          |          |          |           |          |           |       |       |       |
| Afghanistan            | 899.92   | 1,248.63 | 567.96   | 1,043.83  | 1,381.64 | 726.64    | 0.91  | 0.90  | 1.02  |
| Albania                | 276.5    | 269.93   | 282.75   | 440.82    | 396.39   | 485.96    | 0.79  | 0.69  | 0.88  |
| Algeria                | 364.22   | 400.47   | 328.86   | 485.22    | 527.68   | 443.35    | 0.90  | 0.86  | 0.94  |
| American Samoa         | 366.65   | 267.34   | 460.65   | 258.95    | 247.01   | 270.84    | -0.14 | -0.03 | -0.21 |
| Andorra                | 421.44   | 383.19   | 461.77   | 345.53    | 289.04   | 404.39    | -0.18 | -0.23 | -0.13 |
| Angola                 | 453.53   | 542.5    | 362.36   | 326.33    | 412.91   | 238.61    | 0.46  | 0.48  | 0.39  |
| Antigua and Barbuda    | 883.37   | 927.04   | 836.66   | 433.21    | 428.95   | 437.86    | -0.46 | -0.50 | -0.41 |
| Argentina              | 957.98   | 840.46   | 1,080.13 | 397.55    | 378.47   | 417.46    | -0.51 | -0.49 | -0.53 |
| Armenia                | 775.2    | 845.54   | 700.66   | 1,017.67  | 964.37   | 1,079.07  | 0.46  | 0.28  | 0.69  |
| Australia              | 465.62   | 466.06   | 465.18   | 286.25    | 289.86   | 282.63    | -0.29 | -0.31 | -0.27 |
| Austria                | 1,069.57 | 1,188.05 | 940.47   | 403.38    | 421.57   | 384.28    | -0.55 | -0.58 | -0.51 |
| Azerbaijan             | 443.56   | 450.86   | 435.93   | 437.98    | 394.73   | 481.75    | 0.49  | 0.33  | 0.65  |
| Bahrain                | 198.86   | 238.95   | 169.38   | 139.44    | 163.08   | 124.96    | 0.02  | -0.05 | 0.09  |
| Bangladesh             | 516.26   | 589.03   | 446.72   | 755.8     | 737.84   | 773.41    | 2.40  | 2.15  | 2.75  |



|                                  |          |          |          |          |          |          |       |       |       |
|----------------------------------|----------|----------|----------|----------|----------|----------|-------|-------|-------|
| Barbados                         | 971.75   | 988.79   | 953.38   | 716.03   | 740.55   | 689.39   | -0.30 | -0.31 | -0.30 |
| Belarus                          | 1,880.33 | 2,067.66 | 1,668.15 | 2,303.33 | 2,238.52 | 2,378.52 | 0.06  | 0.01  | 0.15  |
| Belgium                          | 813      | 876.17   | 746.9    | 427.17   | 435.3    | 418.71   | -0.40 | -0.44 | -0.35 |
| Belize                           | 378.54   | 374.47   | 382.54   | 278.68   | 242.22   | 315.36   | -0.12 | -0.19 | -0.06 |
| Benin                            | 342.59   | 407.29   | 273.76   | 373.77   | 421.7    | 325.66   | 1.08  | 0.96  | 1.24  |
| Bermuda                          | 568.22   | 525.59   | 611.4    | 320.27   | 283.95   | 357.28   | -0.28 | -0.35 | -0.23 |
| Bhutan                           | 280.83   | 293.68   | 268.9    | 279.95   | 243.64   | 311.22   | 1.24  | 1.02  | 1.41  |
| Bolivia                          | 460.69   | 517      | 404.77   | 405.47   | 433.85   | 377.19   | 0.90  | 0.82  | 1.00  |
| Bosnia and Herzegovina           | 806.18   | 862.22   | 750.07   | 1,520.89 | 1,463.36 | 1,578.95 | 0.92  | 0.66  | 1.20  |
| Botswana                         | 312.81   | 371.59   | 252.65   | 422.09   | 468.11   | 376.02   | 0.05  | 0.00  | 0.14  |
| Brazil                           | 359.74   | 313.11   | 407.12   | 303.8    | 255.03   | 354.19   | 0.06  | 0.02  | 0.10  |
| Brunei                           | 225.48   | 214.48   | 235.33   | 239.11   | 220.85   | 256.29   | 0.08  | 0.04  | 0.11  |
| Bulgaria                         | 2,009.11 | 1,922.91 | 2,097.75 | 2,288.97 | 2,237.75 | 2,342.72 | 0.11  | 0.11  | 0.11  |
| Burkina Faso                     | 248.83   | 293.77   | 201.8    | 204.47   | 253.65   | 154.66   | 0.53  | 0.57  | 0.44  |
| Burundi                          | 777.66   | 924.14   | 626.05   | 326.59   | 373.9    | 278.26   | -0.06 | -0.08 | -0.02 |
| Cambodia                         | 392.96   | 441.59   | 340.86   | 416.46   | 411.57   | 421.61   | 1.59  | 1.34  | 1.95  |
| Cameroon                         | 366.29   | 433.55   | 298.18   | 391.57   | 434.51   | 348.67   | 0.42  | 0.33  | 0.53  |
| Canada                           | 444.51   | 435.91   | 453.25   | 346.33   | 341.33   | 351.39   | -0.19 | -0.22 | -0.16 |
| Cape Verde                       | 553.32   | 565.81   | 539.51   | 459.34   | 496.54   | 421.13   | 0.28  | 0.37  | 0.20  |
| Central African Republic         | 735.38   | 838.88   | 628.37   | 721.09   | 812.6    | 627.15   | 0.20  | 0.14  | 0.22  |
| Chad                             | 328.54   | 403.36   | 252.62   | 330.23   | 386.41   | 274.19   | 0.46  | 0.38  | 0.56  |
| Chile                            | 733.88   | 680.81   | 788.38   | 460.41   | 447.61   | 473.55   | -0.28 | -0.29 | -0.27 |
| China                            | 682.91   | 636.24   | 727.18   | 891.41   | 680.79   | 1,089.81 | 0.94  | 0.74  | 1.08  |
| Colombia                         | 245.08   | 244.11   | 246.06   | 169.74   | 165.23   | 174.38   | -0.08 | -0.16 | 0.00  |
| Comoros                          | 448.77   | 542.27   | 355.88   | 255.21   | 307.53   | 203.84   | 0.23  | 0.23  | 0.24  |
| Congo                            | 662.1    | 814.19   | 509.22   | 474.12   | 685.11   | 263.45   | 0.02  | 0.06  | -0.18 |
| Costa Rica                       | 226.48   | 223.01   | 229.9    | 165.4    | 160.44   | 170.35   | -0.23 | -0.25 | -0.22 |
| Cote d'Ivoire                    | 376.31   | 406.1    | 348.86   | 398.2    | 422.34   | 374.89   | 0.50  | 0.48  | 0.48  |
| Croatia                          | 1,463.04 | 1,485.47 | 1,439.21 | 1,312.41 | 1,363.51 | 1,257.57 | -0.03 | -0.05 | -0.02 |
| Cuba                             | 637.49   | 626.79   | 648.04   | 739.17   | 712.65   | 765.43   | 0.11  | 0.09  | 0.13  |
| Cyprus                           | 565.89   | 509.57   | 623.64   | 278.12   | 231.06   | 328.42   | -0.43 | -0.47 | -0.39 |
| Czech Republic                   | 2,001.74 | 2,097.02 | 1,900.74 | 964.27   | 1,009.82 | 917.26   | -0.40 | -0.42 | -0.38 |
| Democratic Republic of the Congo | 363.29   | 491.33   | 232.08   | 352.4    | 422.31   | 282.13   | 0.58  | 0.40  | 0.98  |
| Denmark                          | 772.11   | 772.15   | 772.07   | 446.54   | 423.63   | 469.82   | -0.28 | -0.34 | -0.23 |
| Djibouti                         | 307.8    | 314.08   | 301.59   | 397.77   | 405.47   | 390.13   | 0.78  | 0.80  | 0.73  |
| Dominica                         | 514.61   | 575.07   | 453.7    | 525.61   | 512.68   | 538.74   | -0.08 | -0.12 | -0.01 |
| Dominican Republic               | 367.83   | 337.9    | 397.37   | 432.11   | 401.8    | 462.62   | 0.58  | 0.63  | 0.54  |
| Ecuador                          | 346.85   | 313.63   | 379.7    | 285.11   | 253.55   | 316.68   | 0.15  | 0.15  | 0.15  |
| Egypt                            | 609.24   | 645.55   | 573.18   | 450.24   | 457.09   | 443.54   | 0.28  | 0.28  | 0.29  |
| El Salvador                      | 363.2    | 335.84   | 391.86   | 186.64   | 175.89   | 198.79   | -0.24 | -0.23 | -0.25 |
| Equatorial Guinea                | 849.31   | 1,044.81 | 662.26   | 293.04   | 342.67   | 245.85   | -0.34 | -0.37 | -0.28 |
| Eritrea                          | 383.96   | 478.71   | 288.01   | 362.07   | 470.73   | 253.8    | 0.66  | 0.66  | 0.56  |
| Estonia                          | 2,649.29 | 2,887.81 | 2,377.86 | 1,200.20 | 1,286.79 | 1,098.54 | -0.42 | -0.47 | -0.38 |
| Ethiopia                         | 514.07   | 552.33   | 475.57   | 319.46   | 351.75   | 287.07   | 0.95  | 0.95  | 0.90  |
| Federated States of Micronesia   | 643.86   | 534.81   | 748.24   | 589.9    | 489.86   | 685.18   | 0.23  | 0.23  | 0.24  |
| Fiji                             | 569.52   | 510.33   | 626.88   | 591.6    | 558.5    | 623.6    | -0.10 | -0.08 | -0.11 |
| Finland                          | 1,055.05 | 1,154.54 | 949.5    | 599.15   | 609.74   | 588.23   | -0.35 | -0.41 | -0.27 |
| France                           | 550.01   | 554.7    | 545.08   | 359.98   | 352.15   | 368.31   | -0.27 | -0.32 | -0.23 |
| Gabon                            | 670.75   | 738.69   | 599.97   | 428.37   | 540.53   | 318.74   | -0.04 | 0.06  | -0.19 |
| Georgia                          | 1,281.05 | 1,206.91 | 1,362.82 | 1,491.82 | 1,232.92 | 1,775.02 | 0.18  | 0.10  | 0.25  |
| Germany                          | 1,033.51 | 1,156.69 | 901.17   | 572.74   | 576.59   | 568.76   | -0.38 | -0.44 | -0.29 |
| Ghana                            | 450.2    | 723.12   | 185.9    | 495.19   | 680.88   | 307.63   | 0.85  | 0.64  | 1.64  |
| Greece                           | 1,152.59 | 1,280.80 | 1,021.08 | 862.5    | 952.03   | 768.55   | -0.24 | -0.25 | -0.23 |
| Greenland                        | 370.84   | 308.55   | 424.74   | 331.44   | 232.38   | 417.33   | 0.25  | 0.07  | 0.35  |
| Grenada                          | 1,106.40 | 1,222.83 | 986.92   | 681.36   | 733.66   | 629.39   | -0.33 | -0.33 | -0.31 |
| Guam                             | 395.97   | 359.42   | 427.9    | 650.76   | 600.71   | 699.41   | 0.22  | 0.23  | 0.20  |
| Guatemala                        | 179.95   | 178.72   | 181.19   | 168.12   | 173.36   | 162.65   | 0.71  | 0.84  | 0.60  |
| Guinea                           | 398.91   | 558.03   | 236.23   | 426.88   | 534.74   | 319.53   | 1.01  | 0.83  | 1.47  |
| Guinea-Bissau                    | 489.14   | 616.29   | 358.93   | 495.08   | 608.83   | 379.92   | 0.50  | 0.45  | 0.58  |
| Guyana                           | 1,008.86 | 881.88   | 1,139.96 | 778.69   | 681      | 875.43   | -0.12 | -0.10 | -0.14 |
| Haiti                            | 1,103.23 | 1,406.33 | 791.21   | 778.22   | 952.91   | 599.72   | 0.36  | 0.28  | 0.48  |

|                          |          |          |          |          |          |          |       |       |       |
|--------------------------|----------|----------|----------|----------|----------|----------|-------|-------|-------|
| Honduras                 | 385.42   | 380.05   | 390.76   | 435.74   | 423.25   | 448.22   | 0.77  | 0.69  | 0.85  |
| Hungary                  | 2,244.55 | 2,198.83 | 2,294.01 | 1,266.97 | 1,267.89 | 1,265.95 | -0.28 | -0.31 | -0.25 |
| Iceland                  | 424.67   | 421.1    | 428.22   | 247.13   | 215.59   | 279.34   | -0.32 | -0.40 | -0.25 |
| India                    | 499.1    | 481.61   | 515.38   | 516.79   | 442.09   | 586.21   | 0.78  | 0.72  | 0.81  |
| Indonesia                | 455.24   | 503.31   | 407.58   | 650.35   | 674.17   | 626.88   | 1.21  | 1.15  | 1.30  |
| Iran                     | 428.37   | 374.48   | 480.31   | 461.13   | 378.55   | 542.47   | 1.06  | 1.05  | 1.05  |
| Iraq                     | 664.23   | 732.5    | 597.2    | 549.47   | 563.98   | 535.3    | 0.03  | 0.04  | 0.04  |
| Ireland                  | 506.71   | 540      | 473.12   | 236.68   | 226.4    | 247.27   | -0.43 | -0.48 | -0.36 |
| Israel                   | 455.23   | 455.69   | 454.77   | 230.12   | 224.97   | 235.36   | -0.39 | -0.41 | -0.37 |
| Italy                    | 906.88   | 908.74   | 904.9    | 538.1    | 564.88   | 509.64   | -0.35 | -0.36 | -0.35 |
| Jamaica                  | 829.25   | 907.4    | 749.11   | 713.69   | 735.53   | 691.68   | -0.18 | -0.20 | -0.15 |
| Japan                    | 812.5    | 748.89   | 878.4    | 729.15   | 629.24   | 834.37   | -0.20 | -0.24 | -0.17 |
| Jordan                   | 524.58   | 591.17   | 464.32   | 293.53   | 277.14   | 309.13   | -0.16 | -0.27 | -0.03 |
| Kazakhstan               | 1,245.92 | 1,346.96 | 1,138.55 | 1,313.40 | 1,176.05 | 1,460.56 | 0.15  | 0.00  | 0.34  |
| Kenya                    | 197.05   | 222.12   | 171.8    | 183.74   | 188.78   | 178.71   | 0.29  | 0.20  | 0.42  |
| Kiribati                 | 1,041.37 | 745.92   | 1,342.98 | 1,123.76 | 685.7    | 1,573.10 | 0.53  | 0.41  | 0.55  |
| Kuwait                   | 135.32   | 133.94   | 136.52   | 180.69   | 152.65   | 202.57   | 0.65  | 0.33  | 0.93  |
| Kyrgyzstan               | 1,094.96 | 1,144.38 | 1,043.41 | 893.56   | 717.41   | 1,073.46 | 0.15  | -0.06 | 0.40  |
| Laos                     | 532.95   | 620.87   | 444.91   | 376.92   | 383.04   | 370.75   | 0.96  | 0.78  | 1.23  |
| Latvia                   | 2,701.75 | 2,971.39 | 2,391.16 | 2,233.27 | 2,413.48 | 2,023.41 | -0.04 | -0.08 | 0.01  |
| Lebanon                  | 494.92   | 663.74   | 321.46   | 328.65   | 462.63   | 196.01   | 0.16  | 0.08  | 0.18  |
| Lesotho                  | 447.42   | 470.3    | 423.2    | 675.5    | 780.27   | 568.61   | -0.05 | 0.00  | -0.13 |
| Liberia                  | 337.38   | 428.07   | 246.17   | 320.69   | 411.62   | 231.23   | 1.46  | 1.34  | 1.55  |
| Libya                    | 251.9    | 284.46   | 222.75   | 382.75   | 398.93   | 366.75   | 0.61  | 0.64  | 0.61  |
| Lithuania                | 1,437.22 | 1,543.91 | 1,318.48 | 1,591.46 | 1,640.50 | 1,534.44 | 0.11  | 0.08  | 0.15  |
| Luxembourg               | 1,027.94 | 1,096.44 | 956.64   | 300.68   | 312.28   | 289.04   | -0.58 | -0.62 | -0.54 |
| Macedonia                | 1,396.43 | 1,342.98 | 1,449.26 | 1,667.07 | 1,608.59 | 1,726.07 | 0.29  | 0.29  | 0.28  |
| Madagascar               | 521.75   | 583.74   | 459.57   | 488.11   | 557.87   | 417.91   | 0.75  | 0.81  | 0.64  |
| Malawi                   | 267.39   | 340.04   | 192.2    | 229.82   | 256.76   | 202.79   | 0.86  | 0.67  | 1.22  |
| Malaysia                 | 299.25   | 292.65   | 305.64   | 318.87   | 270.15   | 368.5    | 0.13  | 0.05  | 0.20  |
| Maldives                 | 212.77   | 172.75   | 250.77   | 146.08   | 101.19   | 190.72   | 0.84  | 0.65  | 0.95  |
| Mali                     | 469.59   | 647.08   | 288.24   | 286.75   | 403.9    | 171.93   | 0.08  | 0.09  | 0.06  |
| Malta                    | 510.46   | 490.45   | 531.19   | 364.08   | 357.01   | 371.2    | -0.28 | -0.27 | -0.30 |
| Marshall Islands         | 519.02   | 405.04   | 628.01   | 540.17   | 438.4    | 638.46   | 0.25  | 0.28  | 0.23  |
| Mauritania               | 391.69   | 504.23   | 278.47   | 279.2    | 377.03   | 182.71   | 0.30  | 0.32  | 0.22  |
| Mauritius                | 555.35   | 481.07   | 629.94   | 432.22   | 383.84   | 481.8    | -0.24 | -0.24 | -0.24 |
| Mexico                   | 186.85   | 186.13   | 187.57   | 180.55   | 178.19   | 182.93   | 0.27  | 0.23  | 0.31  |
| Moldova                  | 1,459.30 | 1,539.65 | 1,371.15 | 1,295.37 | 1,248.26 | 1,346.30 | 0.08  | 0.01  | 0.17  |
| Mongolia                 | 223.64   | 266.22   | 180.05   | 330.94   | 295.38   | 367.22   | 1.17  | 0.89  | 1.66  |
| Montenegro               | 376.28   | 410.86   | 341.39   | 599.76   | 586.46   | 613.37   | 0.54  | 0.42  | 0.69  |
| Morocco                  | 463.67   | 521.5    | 405.62   | 527.54   | 589.42   | 464.21   | 0.71  | 0.69  | 0.72  |
| Mozambique               | 400.34   | 412.63   | 386.95   | 445.21   | 452.18   | 437.92   | 1.03  | 0.95  | 1.06  |
| Myanmar                  | 604.9    | 576.09   | 634.88   | 622.04   | 514.57   | 734.45   | 0.81  | 0.69  | 0.91  |
| Namibia                  | 403.63   | 452.78   | 352.35   | 294.77   | 292.05   | 297.63   | -0.15 | -0.23 | -0.04 |
| Nepal                    | 332.15   | 333.71   | 330.56   | 382.27   | 321.44   | 446.96   | 1.63  | 1.36  | 1.88  |
| Netherlands              | 549.97   | 568.21   | 531.31   | 368.28   | 359.82   | 376.89   | -0.27 | -0.33 | -0.20 |
| New Zealand              | 460.68   | 451.88   | 469.76   | 302.45   | 306.02   | 298.74   | -0.21 | -0.23 | -0.20 |
| Nicaragua                | 189.51   | 180.31   | 198.86   | 166.94   | 157.19   | 176.98   | 0.57  | 0.58  | 0.57  |
| Niger                    | 277.81   | 336.96   | 216.66   | 289.8    | 317.65   | 262.4    | 1.43  | 1.19  | 1.81  |
| Nigeria                  | 321.78   | 403.62   | 241.57   | 193.15   | 210.88   | 176.08   | 0.09  | -0.03 | 0.30  |
| North Korea              | 569.05   | 613.59   | 521.86   | 1,131.97 | 1,096.22 | 1,169.32 | 1.11  | 0.98  | 1.29  |
| Northern Mariana Islands | 252.08   | 219.9    | 281.01   | 157.36   | 100.18   | 214.95   | -0.22 | -0.38 | -0.11 |
| Norway                   | 817.53   | 822.97   | 811.98   | 343.13   | 356.94   | 329.49   | -0.45 | -0.47 | -0.44 |
| Oman                     | 57.52    | 65.88    | 50.85    | 103.5    | 114.45   | 97.95    | 2.06  | 2.14  | 2.21  |
| Pakistan                 | 460.91   | 402.17   | 515.41   | 522.62   | 430.99   | 609.37   | 0.71  | 0.70  | 0.70  |
| Palestine                | 148.89   | 165.86   | 132.34   | 244.67   | 226.04   | 262.78   | 1.49  | 1.18  | 1.90  |
| Panama                   | 365.37   | 324.8    | 405.05   | 268.79   | 231.53   | 305.85   | -0.22 | -0.24 | -0.21 |
| Papua New Guinea         | 717.15   | 739.4    | 695.92   | 705.75   | 776.69   | 637.58   | 0.35  | 0.41  | 0.27  |
| Paraguay                 | 254.37   | 253.65   | 255.08   | 246.31   | 224.71   | 267.26   | 0.04  | 0.00  | 0.07  |
| Peru                     | 345.66   | 335.9    | 355.42   | 169.54   | 162.91   | 176.18   | 0.01  | -0.02 | 0.04  |
| Philippines              | 202.08   | 182.6    | 221.16   | 336.15   | 301.05   | 370.61   | 1.30  | 1.28  | 1.31  |

|                                                      |          |          |          |          |          |          |       |       |       |
|------------------------------------------------------|----------|----------|----------|----------|----------|----------|-------|-------|-------|
| Poland                                               | 1,166.75 | 1,287.63 | 1,039.63 | 928.98   | 918.34   | 940.43   | -0.08 | -0.19 | 0.06  |
| Portugal                                             | 1,825.22 | 1,802.61 | 1,849.53 | 758.95   | 753.71   | 764.53   | -0.50 | -0.51 | -0.49 |
| Puerto Rico                                          | 399.05   | 368.07   | 431.98   | 322.35   | 327.81   | 316.45   | -0.13 | -0.13 | -0.15 |
| Qatar                                                | 141.01   | 164.88   | 129.23   | 81.25    | 90.64    | 77.74    | -0.20 | -0.25 | -0.16 |
| Romania                                              | 1,695.39 | 1,734.25 | 1,655.41 | 1,922.16 | 1,864.99 | 1,983.01 | 0.19  | 0.15  | 0.23  |
| Russia                                               | 2,665.94 | 3,029.52 | 2,253.07 | 2,595.79 | 2,632.71 | 2,552.43 | -0.10 | -0.16 | 0.01  |
| Rwanda                                               | 518.1    | 612.47   | 420.39   | 276.82   | 302.88   | 248.47   | 0.25  | 0.16  | 0.35  |
| Saint Lucia                                          | 936.93   | 991.15   | 881.09   | 648.06   | 694.36   | 599.99   | -0.18 | -0.17 | -0.19 |
| Saint Vincent and the Grenadines                     | 673.8    | 809.18   | 537.07   | 611.46   | 638.37   | 585.05   | -0.08 | -0.15 | 0.04  |
| Samoa                                                | 501.89   | 392.53   | 602.69   | 431.22   | 411.97   | 449.29   | 0.00  | 0.07  | -0.03 |
| Sao Tome and Principe                                | 491.07   | 603.98   | 376.07   | 440.44   | 562.5    | 317.46   | 0.60  | 0.63  | 0.50  |
| Saudi Arabia                                         | 231.83   | 237.3    | 227.53   | 227.81   | 200.11   | 249.08   | 0.72  | 0.60  | 0.81  |
| Senegal                                              | 335.21   | 391.39   | 278.49   | 366.4    | 454.47   | 275.12   | 1.13  | 1.23  | 0.90  |
| Serbia                                               | 1,708.80 | 1,779.34 | 1,636.37 | 2,147.74 | 2,214.36 | 2,077.87 | 0.23  | 0.20  | 0.25  |
| Seychelles                                           | 514.13   | 469.78   | 558.68   | 343.33   | 297.64   | 387.81   | -0.26 | -0.32 | -0.21 |
| Sierra Leone                                         | 334.08   | 321.48   | 346.95   | 401.96   | 482.37   | 319.89   | 1.15  | 1.57  | 0.71  |
| Singapore                                            | 540.11   | 546.3    | 534.07   | 384.92   | 393.89   | 375.63   | -0.18 | -0.20 | -0.17 |
| Slovakia                                             | 1,145.97 | 1,141.55 | 1,150.60 | 886.42   | 855.49   | 919.06   | -0.07 | -0.16 | 0.00  |
| Slovenia                                             | 1,301.62 | 1,314.91 | 1,287.53 | 672.16   | 674.39   | 669.88   | -0.39 | -0.42 | -0.37 |
| Solomon Islands                                      | 765.41   | 706.82   | 820.89   | 712.41   | 675.19   | 748.47   | 0.21  | 0.23  | 0.20  |
| Somalia                                              | 602.35   | 685.04   | 518.18   | 414.79   | 465.33   | 363.77   | 0.03  | 0.01  | 0.05  |
| South Africa                                         | 478.06   | 615.87   | 337.05   | 488.4    | 557.41   | 416.95   | -0.03 | -0.14 | 0.17  |
| South Korea                                          | 1,022.14 | 1,014.23 | 1,030.01 | 660.68   | 615.01   | 706.91   | -0.26 | -0.32 | -0.20 |
| South Sudan                                          | 375.59   | 461.61   | 288.76   | 364.06   | 447.19   | 281.18   | 0.55  | 0.55  | 0.57  |
| Spain                                                | 840.16   | 879.3    | 799.37   | 360.52   | 378.83   | 341.75   | -0.49 | -0.52 | -0.46 |
| Sri Lanka                                            | 214.73   | 172.37   | 256.28   | 519.3    | 447.92   | 596.04   | 2.41  | 2.48  | 2.34  |
| Sudan                                                | 686.25   | 763.35   | 609.75   | 609.01   | 631.8    | 586.39   | 0.73  | 0.64  | 0.83  |
| Suriname                                             | 623      | 628.95   | 617.24   | 638.29   | 618.08   | 658.42   | 0.17  | 0.17  | 0.17  |
| Swaziland                                            | 336.91   | 378.86   | 290      | 495.33   | 565.21   | 423.98   | 0.08  | 0.05  | 0.10  |
| Sweden                                               | 836.06   | 832.6    | 839.61   | 493.69   | 504.02   | 483.35   | -0.29 | -0.31 | -0.28 |
| Switzerland                                          | 596.94   | 597.63   | 596.21   | 289.38   | 291.54   | 287.17   | -0.40 | -0.43 | -0.37 |
| Syria                                                | 594.17   | 576.09   | 611.67   | 439.27   | 411.9    | 465.97   | -0.38 | -0.23 | -0.47 |
| Taiwan                                               | 580.69   | 469.15   | 684.22   | 434.02   | 361.75   | 506.53   | -0.26 | -0.26 | -0.26 |
| Tajikistan                                           | 558.09   | 565.32   | 550.78   | 421.84   | 386.04   | 456.8    | 0.48  | 0.37  | 0.59  |
| Tanzania                                             | 298.66   | 342.85   | 253.69   | 271.95   | 287.57   | 256.14   | 0.73  | 0.59  | 0.89  |
| Thailand                                             | 215.86   | 211.99   | 219.81   | 407.2    | 349.45   | 466.61   | 0.83  | 0.68  | 0.98  |
| The Bahamas                                          | 528.01   | 531.98   | 523.99   | 494.65   | 509.22   | 479.46   | 0.03  | 0.01  | 0.04  |
| The Gambia                                           | 294.22   | 366.71   | 222.77   | 243.94   | 267.68   | 219.75   | 0.54  | 0.44  | 0.75  |
| Timor-Leste                                          | 237.98   | 273.78   | 203.09   | 294.21   | 342.85   | 247.08   | 2.22  | 2.32  | 2.13  |
| Togo                                                 | 375.84   | 467.7    | 281.61   | 353.3    | 377.36   | 328.68   | 0.42  | 0.28  | 0.66  |
| Tonga                                                | 401.82   | 443.46   | 361.2    | 416.03   | 421.91   | 410.19   | 0.14  | 0.10  | 0.19  |
| Trinidad and Tobago                                  | 791.21   | 761.95   | 820.69   | 625.01   | 554.24   | 697.66   | -0.25 | -0.27 | -0.23 |
| Tunisia                                              | 499.19   | 437.42   | 560.22   | 549.43   | 479.44   | 621.06   | 0.48  | 0.54  | 0.43  |
| Turkey                                               | 355.26   | 410.68   | 298.49   | 324.25   | 319.18   | 329.51   | 0.74  | 0.46  | 1.12  |
| Turkmenistan                                         | 146.87   | 170.31   | 122.78   | 160.52   | 169.06   | 151.68   | 0.83  | 0.76  | 0.97  |
| Uganda                                               | 365.01   | 427.6    | 301.6    | 256.62   | 252.73   | 260.52   | 0.43  | 0.23  | 0.70  |
| Ukraine                                              | 2,508.82 | 2,810.97 | 2,157.20 | 2,124.03 | 2,213.15 | 2,018.76 | -0.22 | -0.24 | -0.17 |
| United Arab Emirates                                 | 317.27   | 346.26   | 302.22   | 294.57   | 245.28   | 312.54   | 0.16  | 0.01  | 0.26  |
| United Kingdom                                       | 911.02   | 978.47   | 839.67   | 469.99   | 483.69   | 455.95   | -0.36 | -0.41 | -0.31 |
| United States                                        | 502.81   | 515.61   | 489.35   | 383.21   | 383.23   | 383.19   | -0.18 | -0.24 | -0.12 |
| Uruguay                                              | 1,272.45 | 1,231.62 | 1,315.79 | 833.47   | 895.57   | 766.95   | -0.27 | -0.22 | -0.32 |
| Uzbekistan                                           | 658.47   | 638.75   | 678.62   | 660.18   | 554.55   | 769.28   | 0.34  | 0.21  | 0.47  |
| Vanuatu                                              | 838.17   | 712.46   | 957.03   | 801.61   | 750.2    | 851.74   | 0.09  | 0.18  | 0.03  |
| Venezuela                                            | 314.92   | 304.63   | 325.05   | 220.38   | 203.68   | 237.22   | -0.32 | -0.29 | -0.34 |
| Vietnam                                              | 527.83   | 528.32   | 527.31   | 647.99   | 589.62   | 707.61   | 0.78  | 0.72  | 0.86  |
| Virgin Islands, U.S.                                 | 371.78   | 335.65   | 410.05   | 620.64   | 532.34   | 717.69   | 0.25  | 0.24  | 0.26  |
| Yemen                                                | 584.26   | 720.45   | 445.57   | 592.05   | 701.32   | 485.03   | 1.14  | 1.09  | 1.27  |
| Zambia                                               | 260.6    | 358.49   | 161.05   | 307.3    | 330.95   | 283.59   | 0.98  | 0.61  | 1.82  |
| Zimbabwe                                             | 167.49   | 213.94   | 120.66   | 185.07   | 206.08   | 163.45   | -0.03 | -0.17 | 0.18  |
| <b>Other cardiovascular and circulatory diseases</b> |          |          |          |          |          |          |       |       |       |
| Afghanistan                                          | 383.84   | 522.23   | 252.11   | 522.74   | 728.38   | 329.64   | 1.24  | 1.39  | 1.07  |

|                                  |          |          |          |        |        |          |       |       |       |
|----------------------------------|----------|----------|----------|--------|--------|----------|-------|-------|-------|
| Albania                          | 351.82   | 292.88   | 407.96   | 557.78 | 457.74 | 659.43   | 0.78  | 0.80  | 0.76  |
| Algeria                          | 409.66   | 453.36   | 367.04   | 314.65 | 358.48 | 271.43   | 0.10  | 0.12  | 0.06  |
| American Samoa                   | 195.91   | 108.51   | 278.65   | 215.27 | 183.54 | 246.84   | 0.34  | 0.79  | 0.19  |
| Andorra                          | 231.4    | 218.49   | 245.01   | 253.93 | 230.74 | 278.09   | 0.10  | 0.08  | 0.12  |
| Angola                           | 597.55   | 624.94   | 569.48   | 432    | 483.16 | 380.17   | 0.46  | 0.49  | 0.41  |
| Antigua and Barbuda              | 252.55   | 220.32   | 287.03   | 392.82 | 333.21 | 457.83   | 0.72  | 0.65  | 0.79  |
| Argentina                        | 277.79   | 273.75   | 281.98   | 354.25 | 367.04 | 340.91   | 0.51  | 0.53  | 0.48  |
| Armenia                          | 34.68    | 35.84    | 33.45    | 71.68  | 74.33  | 68.62    | 1.31  | 1.33  | 1.25  |
| Australia                        | 176.68   | 173.15   | 180.23   | 187.93 | 186.13 | 189.74   | 0.23  | 0.19  | 0.27  |
| Austria                          | 415.61   | 471.38   | 354.86   | 316.27 | 351.06 | 279.76   | -0.10 | -0.13 | -0.05 |
| Azerbaijan                       | 61.27    | 57.95    | 64.73    | 99.74  | 81.42  | 118.27   | 1.45  | 1.14  | 1.73  |
| Bahrain                          | 171.63   | 175.66   | 168.66   | 98.89  | 109.87 | 92.17    | -0.17 | -0.13 | -0.19 |
| Bangladesh                       | 15.3     | 15.71    | 14.92    | 20.5   | 18.71  | 22.26    | 2.11  | 1.99  | 2.23  |
| Barbados                         | 240.33   | 245.02   | 235.28   | 511.2  | 532.47 | 488.07   | 1.02  | 1.00  | 1.03  |
| Belarus                          | 56.62    | 63.26    | 49.09    | 64.85  | 65.06  | 64.6     | -0.01 | -0.04 | 0.06  |
| Belgium                          | 349.38   | 371.59   | 326.14   | 417.04 | 426.32 | 407.38   | 0.36  | 0.28  | 0.45  |
| Belize                           | 212.45   | 187.83   | 236.65   | 325.55 | 287.58 | 363.74   | 0.83  | 0.93  | 0.75  |
| Benin                            | 597.7    | 646.8    | 545.45   | 425.45 | 413.1  | 437.85   | 0.37  | 0.23  | 0.53  |
| Bermuda                          | 275.46   | 245.83   | 305.47   | 336.13 | 276.28 | 397.13   | 0.55  | 0.35  | 0.72  |
| Bhutan                           | 17.3     | 17.36    | 17.24    | 24.25  | 20.44  | 27.53    | 2.14  | 1.87  | 2.33  |
| Bolivia                          | 697.05   | 688.45   | 705.58   | 319.91 | 288.6  | 351.11   | -0.01 | -0.09 | 0.07  |
| Bosnia and Herzegovina           | 460.93   | 417.13   | 504.78   | 367.28 | 277.91 | 457.48   | -0.19 | -0.35 | -0.05 |
| Botswana                         | 128.9    | 157.05   | 100.08   | 160.52 | 188.13 | 132.9    | -0.03 | -0.04 | 0.00  |
| Brazil                           | 325.58   | 287.8    | 363.96   | 331.59 | 302.96 | 361.19   | 0.28  | 0.32  | 0.25  |
| Brunei                           | 101.01   | 98.01    | 103.69   | 110.65 | 102.15 | 118.65   | 0.12  | 0.06  | 0.17  |
| Bulgaria                         | 707.28   | 546.46   | 872.64   | 886.69 | 699.39 | 1,083.27 | 0.22  | 0.22  | 0.23  |
| Burkina Faso                     | 666.16   | 763.65   | 564.12   | 483.36 | 531.51 | 434.58   | 0.35  | 0.27  | 0.45  |
| Burundi                          | 1,138.71 | 1,140.12 | 1,137.25 | 454.18 | 445.68 | 462.86   | -0.11 | -0.11 | -0.10 |
| Cambodia                         | 340.75   | 312.49   | 371.02   | 219.47 | 189.23 | 251.22   | 0.57  | 0.52  | 0.61  |
| Cameroon                         | 664.18   | 727.37   | 600.2    | 491.83 | 485.52 | 498.13   | -0.01 | -0.10 | 0.09  |
| Canada                           | 192.87   | 197.94   | 187.71   | 212.75 | 217.51 | 207.92   | 0.15  | 0.09  | 0.21  |
| Cape Verde                       | 895.8    | 802.16   | 999.35   | 590.93 | 658.66 | 521.39   | 0.02  | 0.29  | -0.20 |
| Central African Republic         | 627.96   | 662.76   | 591.98   | 646.46 | 663.43 | 629.04   | 0.26  | 0.18  | 0.29  |
| Chad                             | 526.26   | 625.75   | 425.33   | 437.87 | 472.69 | 403.14   | 0.22  | 0.10  | 0.38  |
| Chile                            | 71.29    | 69.68    | 72.94    | 138.4  | 144.84 | 131.79   | 1.23  | 1.24  | 1.19  |
| China                            | 415.91   | 400.17   | 430.84   | 206.95 | 174.7  | 237.33   | -0.26 | -0.29 | -0.24 |
| Colombia                         | 226.95   | 221.9    | 232.06   | 268.17 | 279.72 | 256.27   | 0.57  | 0.56  | 0.56  |
| Comoros                          | 802.83   | 764.96   | 840.46   | 405.22 | 397.91 | 412.4    | 0.09  | 0.13  | 0.06  |
| Congo                            | 544.02   | 592.74   | 495.06   | 442.65 | 566.09 | 319.39   | 0.16  | 0.20  | 0.03  |
| Costa Rica                       | 115.62   | 114.58   | 116.64   | 216.03 | 209.23 | 222.81   | 0.96  | 0.89  | 1.02  |
| Cote d'Ivoire                    | 590.8    | 609.35   | 573.7    | 455.55 | 444.09 | 466.62   | 0.09  | 0.05  | 0.13  |
| Croatia                          | 777.36   | 719.8    | 838.52   | 457.65 | 428.73 | 488.69   | -0.37 | -0.39 | -0.35 |
| Cuba                             | 84.26    | 79.7     | 88.76    | 232.58 | 198.48 | 266.35   | 1.65  | 1.38  | 1.89  |
| Cyprus                           | 357.29   | 356.82   | 357.78   | 260.11 | 249.39 | 271.56   | -0.15 | -0.18 | -0.13 |
| Czech Republic                   | 540.36   | 538.88   | 541.93   | 565    | 553.74 | 576.62   | 0.30  | 0.23  | 0.36  |
| Democratic Republic of the Congo | 369.92   | 431.68   | 306.64   | 347.96 | 383.78 | 311.95   | 0.53  | 0.44  | 0.66  |
| Denmark                          | 468.34   | 438.58   | 498.96   | 315.02 | 296.71 | 333.63   | -0.17 | -0.18 | -0.16 |
| Djibouti                         | 670.01   | 559.01   | 779.7    | 668.79 | 542.28 | 794.17   | 0.37  | 0.36  | 0.36  |
| Dominica                         | 187.83   | 201.02   | 174.55   | 423.17 | 413.21 | 433.29   | 1.04  | 1.04  | 1.08  |
| Dominican Republic               | 222.15   | 188.19   | 255.66   | 237.13 | 208.73 | 265.71   | 0.44  | 0.52  | 0.38  |
| Ecuador                          | 130.07   | 113.8    | 146.17   | 152.23 | 128.02 | 176.44   | 0.64  | 0.60  | 0.66  |
| Egypt                            | 881.83   | 840.42   | 922.97   | 556    | 479.9  | 630.53   | 0.09  | 0.03  | 0.14  |
| El Salvador                      | 217.79   | 205.01   | 231.17   | 225.42 | 231.5  | 218.56   | 0.54  | 0.67  | 0.39  |
| Equatorial Guinea                | 740.01   | 789.73   | 692.44   | 438.15 | 468.42 | 409.37   | 0.14  | 0.13  | 0.15  |
| Eritrea                          | 701.99   | 713.19   | 690.65   | 555.94 | 614.77 | 497.33   | 0.39  | 0.46  | 0.28  |
| Estonia                          | 88.64    | 88.36    | 88.95    | 225.14 | 220.59 | 230.48   | 2.24  | 1.98  | 2.50  |
| Ethiopia                         | 882.54   | 878.79   | 886.32   | 380.23 | 379.44 | 381.02   | 0.35  | 0.33  | 0.35  |
| Federated States of Micronesia   | 356.56   | 304.89   | 406.03   | 346.58 | 332.52 | 359.97   | 0.30  | 0.46  | 0.20  |
| Fiji                             | 405.71   | 357.05   | 452.85   | 711.94 | 702.74 | 720.83   | 0.53  | 0.65  | 0.43  |
| Finland                          | 186.58   | 201.71   | 170.53   | 307.25 | 308.4  | 306.07   | 0.89  | 0.70  | 1.11  |
| France                           | 567.05   | 514.72   | 622.24   | 512.42 | 458.89 | 569.42   | 0.00  | -0.04 | 0.04  |

|                  |          |          |          |        |        |        |       |       |       |
|------------------|----------|----------|----------|--------|--------|--------|-------|-------|-------|
| Gabon            | 605.39   | 609.91   | 600.68   | 436.38 | 483.4  | 390.42 | 0.08  | 0.15  | -0.01 |
| Georgia          | 65.47    | 61.45    | 69.9     | 300.02 | 195.56 | 414.28 | 3.63  | 2.43  | 4.70  |
| Germany          | 299.45   | 326.55   | 270.35   | 498.58 | 506.2  | 490.71 | 0.87  | 0.75  | 1.04  |
| Ghana            | 292.74   | 209.79   | 373.08   | 288.18 | 233.29 | 343.62 | 0.67  | 0.99  | 0.49  |
| Greece           | 220.59   | 228.92   | 212.05   | 174.81 | 180.82 | 168.49 | -0.20 | -0.21 | -0.19 |
| Greenland        | 381.8    | 265.84   | 482.16   | 423.12 | 308.46 | 522.53 | 0.55  | 0.65  | 0.49  |
| Grenada          | 233.78   | 211.87   | 256.26   | 411.03 | 362.87 | 458.89 | 0.93  | 0.92  | 0.93  |
| Guam             | 153.14   | 145.17   | 160.11   | 302.08 | 302.96 | 301.22 | 0.46  | 0.54  | 0.39  |
| Guatemala        | 135.45   | 120.96   | 150.15   | 139.11 | 124.82 | 154.02 | 0.88  | 0.96  | 0.82  |
| Guinea           | 679.44   | 798.21   | 558.02   | 473.17 | 475.69 | 470.67 | 0.31  | 0.15  | 0.56  |
| Guinea-Bissau    | 759.98   | 876.75   | 640.39   | 583.27 | 623.32 | 542.73 | 0.16  | 0.07  | 0.29  |
| Guyana           | 193.02   | 171.64   | 215.09   | 342.07 | 307.27 | 376.54 | 1.01  | 1.08  | 0.96  |
| Haiti            | 414.68   | 459.71   | 368.32   | 355.13 | 381.21 | 328.49 | 0.65  | 0.56  | 0.74  |
| Honduras         | 132.65   | 129.71   | 135.58   | 109.85 | 98.72  | 120.98 | 0.30  | 0.16  | 0.44  |
| Hungary          | 590.83   | 558.66   | 625.63   | 407.89 | 387.08 | 430.82 | -0.12 | -0.18 | -0.06 |
| Iceland          | 196.84   | 199.14   | 194.57   | 191.77 | 175.12 | 208.76 | 0.13  | 0.04  | 0.23  |
| India            | 17.06    | 17.8     | 16.38    | 29.43  | 26.29  | 32.35  | 1.96  | 1.77  | 2.14  |
| Indonesia        | 179.61   | 155.01   | 204.01   | 184.5  | 166.97 | 201.78 | 0.59  | 0.72  | 0.48  |
| Iran             | 1,310.89 | 1,050.43 | 1,561.89 | 692.01 | 514.23 | 867.13 | 0.01  | -0.01 | 0.01  |
| Iraq             | 633.05   | 596.36   | 669.07   | 467.76 | 432.64 | 502.01 | -0.08 | -0.02 | -0.13 |
| Ireland          | 202.55   | 206.64   | 198.42   | 166.96 | 157.01 | 177.2  | 0.01  | -0.06 | 0.09  |
| Israel           | 89.04    | 92.74    | 85.33    | 165.11 | 175.04 | 155.01 | 1.24  | 1.25  | 1.22  |
| Italy            | 212.21   | 212.89   | 211.5    | 245.23 | 248.88 | 241.35 | 0.27  | 0.21  | 0.32  |
| Jamaica          | 207.16   | 189.48   | 225.3    | 314.4  | 300.93 | 327.97 | 0.45  | 0.57  | 0.34  |
| Japan            | 164.37   | 148.17   | 181.16   | 238.6  | 230.9  | 246.71 | 0.29  | 0.41  | 0.19  |
| Jordan           | 229.68   | 270.28   | 192.95   | 165.5  | 180.26 | 151.46 | 0.08  | 0.04  | 0.14  |
| Kazakhstan       | 100.47   | 81.89    | 120.22   | 317.07 | 181.54 | 462.3  | 2.44  | 1.53  | 3.03  |
| Kenya            | 297.06   | 309.13   | 284.9    | 287.22 | 274.16 | 300.28 | 0.34  | 0.26  | 0.43  |
| Kiribati         | 368.12   | 289.89   | 447.97   | 513.12 | 495.27 | 531.42 | 0.97  | 1.62  | 0.57  |
| Kuwait           | 94.98    | 105.47   | 85.8     | 115.32 | 124.82 | 107.9  | 0.50  | 0.38  | 0.63  |
| Kyrgyzstan       | 66.09    | 73.08    | 58.8     | 103    | 86     | 120.36 | 1.20  | 0.75  | 1.78  |
| Laos             | 447.82   | 425.07   | 470.6    | 239.46 | 201.37 | 277.92 | 0.48  | 0.37  | 0.58  |
| Latvia           | 75.15    | 87.05    | 61.44    | 172.92 | 149.38 | 200.33 | 1.67  | 0.94  | 2.88  |
| Lebanon          | 323.21   | 333.3    | 312.83   | 245.02 | 287.66 | 202.82 | 0.32  | 0.33  | 0.25  |
| Lesotho          | 161.77   | 193.63   | 128.03   | 235.31 | 273.23 | 196.62 | -0.09 | -0.15 | -0.02 |
| Liberia          | 644.06   | 741.08   | 546.5    | 352.83 | 387.43 | 318.8  | 0.42  | 0.28  | 0.59  |
| Libya            | 558.61   | 552.77   | 563.84   | 365.65 | 359.12 | 372.11 | -0.31 | -0.24 | -0.36 |
| Lithuania        | 98.11    | 102.82   | 92.87    | 292.54 | 238.52 | 355.36 | 2.00  | 1.36  | 2.79  |
| Luxembourg       | 691.78   | 686.1    | 697.69   | 457.34 | 449.62 | 465.09 | -0.06 | -0.12 | 0.01  |
| Macedonia        | 445.68   | 380.42   | 510.17   | 348.81 | 273.55 | 424.74 | -0.16 | -0.23 | -0.10 |
| Madagascar       | 980.23   | 916.02   | 1,044.65 | 785.89 | 712.01 | 860.24 | 0.50  | 0.47  | 0.49  |
| Malawi           | 546.33   | 601.12   | 489.62   | 367.51 | 353.59 | 381.49 | 0.46  | 0.31  | 0.64  |
| Malaysia         | 378.96   | 351.74   | 405.38   | 352.71 | 334.63 | 371.13 | -0.02 | 0.08  | -0.09 |
| Maldives         | 507.55   | 424.56   | 586.37   | 270.87 | 192.95 | 348.35 | 0.43  | 0.27  | 0.52  |
| Mali             | 701.84   | 892.91   | 506.62   | 394.68 | 470.56 | 320.3  | 0.00  | -0.07 | 0.13  |
| Malta            | 229.25   | 216.58   | 242.36   | 248.55 | 234.38 | 262.83 | 0.09  | 0.08  | 0.09  |
| Marshall Islands | 348.64   | 300      | 395.15   | 465.07 | 503.07 | 428.37 | 0.61  | 0.99  | 0.32  |
| Mauritania       | 518.63   | 599.8    | 436.97   | 330.05 | 377.01 | 283.73 | 0.17  | 0.13  | 0.22  |
| Mauritius        | 138.85   | 106.89   | 170.95   | 165.4  | 150    | 181.18 | 0.17  | 0.34  | 0.05  |
| Mexico           | 160.38   | 142.47   | 178.48   | 163.64 | 143.6  | 183.89 | 0.34  | 0.29  | 0.38  |
| Moldova          | 66.42    | 59.5     | 74       | 99.64  | 75.01  | 126.27 | 0.82  | 0.57  | 1.03  |
| Mongolia         | 219.03   | 159.71   | 279.75   | 114.74 | 79.67  | 150.52 | -0.23 | -0.15 | -0.30 |
| Montenegro       | 272.65   | 247.56   | 297.95   | 312.79 | 283.14 | 343.15 | 0.11  | 0.14  | 0.08  |
| Morocco          | 967.92   | 897.89   | 1,038.22 | 579.91 | 527.11 | 633.94 | -0.10 | -0.12 | -0.08 |
| Mozambique       | 653.82   | 621.47   | 689.09   | 637.46 | 571.74 | 706.2  | 0.79  | 0.66  | 0.88  |
| Myanmar          | 324.15   | 305.76   | 343.28   | 284.4  | 278.91 | 290.14 | 0.54  | 0.72  | 0.39  |
| Namibia          | 157.16   | 184.66   | 128.46   | 118.62 | 134.56 | 101.83 | -0.12 | -0.13 | -0.10 |
| Nepal            | 14.09    | 13.19    | 15.01    | 18.77  | 15.33  | 22.42  | 2.04  | 1.85  | 2.18  |
| Netherlands      | 328.92   | 344.37   | 313.13   | 368.13 | 361.34 | 375.03 | 0.22  | 0.10  | 0.34  |
| New Zealand      | 186.45   | 173.64   | 199.65   | 182.85 | 171.92 | 194.19 | 0.17  | 0.12  | 0.23  |
| Nicaragua        | 120.42   | 121.72   | 119.09   | 138.67 | 143.73 | 133.46 | 1.05  | 1.13  | 0.97  |

|                                  |          |          |          |          |          |          |       |       |       |
|----------------------------------|----------|----------|----------|----------|----------|----------|-------|-------|-------|
| Niger                            | 555.36   | 628.14   | 480.13   | 316.11   | 341.31   | 291.32   | 0.33  | 0.27  | 0.42  |
| Nigeria                          | 514.13   | 611.57   | 418.65   | 302.25   | 324.69   | 280.63   | 0.07  | -0.01 | 0.20  |
| North Korea                      | 337.72   | 362.53   | 311.44   | 287.1    | 315.48   | 257.45   | -0.09 | -0.03 | -0.14 |
| Northern Mariana Islands         | 177.13   | 168.29   | 185.08   | 172.52   | 144.52   | 200.72   | 0.22  | 0.16  | 0.27  |
| Norway                           | 352.15   | 345.28   | 359.17   | 257.24   | 261.63   | 252.9    | -0.05 | -0.08 | -0.02 |
| Oman                             | 3,094.79 | 2,934.15 | 3,222.94 | 1,278.70 | 1,020.90 | 1,409.42 | -0.30 | -0.37 | -0.27 |
| Pakistan                         | 18.65    | 13.78    | 23.17    | 31.37    | 25.16    | 37.26    | 1.53  | 1.89  | 1.31  |
| Palestine                        | 279.31   | 274.2    | 284.3    | 246.45   | 236.16   | 256.45   | 0.34  | 0.37  | 0.32  |
| Panama                           | 104.3    | 98.2     | 110.26   | 188.42   | 176.28   | 200.49   | 0.92  | 0.92  | 0.91  |
| Papua New Guinea                 | 398.97   | 397.2    | 400.65   | 402.19   | 420.98   | 384.13   | 0.38  | 0.42  | 0.34  |
| Paraguay                         | 163.04   | 136.69   | 188.78   | 217.14   | 187.12   | 246.24   | 0.42  | 0.55  | 0.33  |
| Peru                             | 142.67   | 109.1    | 176.24   | 159.53   | 128.65   | 190.46   | 1.30  | 1.37  | 1.27  |
| Philippines                      | 35.2     | 31.9     | 38.42    | 81.62    | 72.81    | 90.28    | 2.21  | 2.16  | 2.24  |
| Poland                           | 441.45   | 325.85   | 563.04   | 333.73   | 267.99   | 404.48   | -0.13 | -0.07 | -0.16 |
| Portugal                         | 293.44   | 274.37   | 313.95   | 303.05   | 299.2    | 307.16   | 0.24  | 0.27  | 0.21  |
| Puerto Rico                      | 212.24   | 207.92   | 216.83   | 270.7    | 253.82   | 288.93   | 0.37  | 0.19  | 0.54  |
| Qatar                            | 198.16   | 221.15   | 186.81   | 129.07   | 133.28   | 127.49   | -0.10 | -0.18 | -0.05 |
| Romania                          | 404.25   | 273.58   | 538.68   | 345.14   | 206.26   | 492.96   | -0.11 | -0.20 | -0.06 |
| Russia                           | 90.24    | 87.35    | 93.51    | 238.27   | 201.12   | 281.91   | 1.46  | 1.24  | 1.69  |
| Rwanda                           | 770.43   | 836.53   | 701.99   | 392.95   | 399.73   | 385.57   | 0.20  | 0.13  | 0.26  |
| Saint Lucia                      | 240.79   | 232.66   | 249.17   | 423.22   | 402.55   | 444.68   | 1.08  | 1.04  | 1.11  |
| Saint Vincent and the Grenadines | 274.04   | 287.68   | 260.26   | 531.76   | 478.99   | 583.56   | 0.97  | 0.80  | 1.15  |
| Samoa                            | 255.13   | 195.45   | 310.14   | 301.82   | 324.84   | 280.2    | 0.38  | 0.70  | 0.18  |
| Sao Tome and Principe            | 816.47   | 1,056.75 | 571.74   | 595.4    | 768.11   | 421.39   | 0.31  | 0.29  | 0.33  |
| Saudi Arabia                     | 209.9    | 216.62   | 204.61   | 201.58   | 200.33   | 202.54   | 0.68  | 0.74  | 0.64  |
| Senegal                          | 425.35   | 518.19   | 331.62   | 301.62   | 363.2    | 237.77   | 0.39  | 0.37  | 0.39  |
| Serbia                           | 345.64   | 310.18   | 382.05   | 466.09   | 405.66   | 529.47   | 0.32  | 0.26  | 0.36  |
| Seychelles                       | 446.72   | 333.64   | 560.28   | 352.35   | 272.71   | 429.88   | -0.13 | -0.13 | -0.12 |
| Sierra Leone                     | 625.54   | 648.45   | 602.17   | 439.89   | 472.85   | 406.25   | 0.26  | 0.25  | 0.26  |
| Singapore                        | 62.98    | 69.77    | 56.36    | 77.49    | 86.04    | 68.64    | 0.42  | 0.37  | 0.44  |
| Slovakia                         | 638.55   | 553.2    | 727.94   | 454.27   | 422.47   | 487.82   | -0.15 | -0.14 | -0.16 |
| Slovenia                         | 344.76   | 337.83   | 352.1    | 392.45   | 395.91   | 388.92   | 0.33  | 0.31  | 0.35  |
| Solomon Islands                  | 354.94   | 315.97   | 391.83   | 413.82   | 410.7    | 416.83   | 0.52  | 0.67  | 0.40  |
| Somalia                          | 932.15   | 998.59   | 864.53   | 624.07   | 669.53   | 578.18   | -0.01 | -0.01 | -0.01 |
| South Africa                     | 198.62   | 237.66   | 158.66   | 238.43   | 284.7    | 190.52   | 0.14  | 0.14  | 0.13  |
| South Korea                      | 106.57   | 109.37   | 103.78   | 120.49   | 126.81   | 114.09   | 0.30  | 0.31  | 0.29  |
| South Sudan                      | 795.84   | 857.68   | 733.42   | 591.69   | 633.87   | 549.64   | 0.19  | 0.18  | 0.20  |
| Spain                            | 368.55   | 338.03   | 400.35   | 330.89   | 321.95   | 340.07   | 0.07  | 0.07  | 0.07  |
| Sri Lanka                        | 734.28   | 512.12   | 952.16   | 279.05   | 208.29   | 355.1    | -0.47 | -0.46 | -0.46 |
| Sudan                            | 607.72   | 617.25   | 598.26   | 472.62   | 457.92   | 487.22   | 0.51  | 0.47  | 0.56  |
| Suriname                         | 185.19   | 171.99   | 197.97   | 295.92   | 268.48   | 323.25   | 0.83  | 0.86  | 0.80  |
| Swaziland                        | 159.45   | 186.54   | 129.16   | 215.83   | 249.8    | 181.14   | -0.01 | -0.06 | 0.05  |
| Sweden                           | 397.29   | 384.3    | 410.59   | 301.2    | 291.09   | 311.34   | -0.09 | -0.13 | -0.05 |
| Switzerland                      | 594.57   | 558.9    | 631.92   | 348.17   | 337.59   | 358.98   | -0.27 | -0.29 | -0.26 |
| Syria                            | 194.04   | 171.32   | 216.03   | 138.88   | 124.31   | 153.09   | -0.41 | -0.22 | -0.51 |
| Taiwan                           | 224.17   | 210.06   | 237.26   | 229.27   | 258.42   | 200.03   | 0.01  | 0.18  | -0.16 |
| Tajikistan                       | 28.13    | 30.35    | 25.89    | 30.27    | 26.12    | 34.32    | 1.10  | 0.73  | 1.54  |
| Tanzania                         | 528.27   | 545.99   | 510.23   | 408.84   | 397.05   | 420.77   | 0.48  | 0.40  | 0.55  |
| Thailand                         | 396.94   | 304.35   | 491.23   | 405.55   | 359.95   | 452.47   | -0.01 | 0.20  | -0.14 |
| The Bahamas                      | 219.46   | 213.28   | 225.73   | 399.68   | 402.48   | 396.76   | 1.01  | 1.00  | 0.99  |
| The Gambia                       | 451.06   | 505.88   | 397.03   | 303.52   | 296.8    | 310.37   | 0.25  | 0.15  | 0.38  |
| Timor-Leste                      | 277.86   | 271.43   | 284.12   | 173.9    | 168.1    | 179.53   | 0.62  | 0.63  | 0.61  |
| Togo                             | 541.33   | 623.69   | 456.84   | 397.62   | 391.78   | 403.59   | 0.11  | 0.01  | 0.26  |
| Tonga                            | 46.19    | 36.54    | 55.6     | 59       | 51.44    | 66.51    | 0.41  | 0.63  | 0.26  |
| Trinidad and Tobago              | 87.43    | 93.69    | 81.13    | 266.41   | 266.36   | 266.46   | 1.90  | 1.85  | 1.99  |
| Tunisia                          | 456.28   | 450.88   | 461.61   | 380.44   | 367.64   | 393.53   | 0.12  | 0.14  | 0.10  |
| Turkey                           | 465.3    | 438.3    | 492.96   | 343.09   | 348.22   | 337.77   | 0.40  | 0.49  | 0.31  |
| Turkmenistan                     | 54.24    | 57.38    | 51       | 55.01    | 52.36    | 57.76    | 0.70  | 0.62  | 0.81  |
| Uganda                           | 576.9    | 626.3    | 526.85   | 454.91   | 414.09   | 495.76   | 0.60  | 0.38  | 0.85  |
| Ukraine                          | 56.01    | 56.9     | 54.98    | 70.1     | 64       | 77.32    | 0.16  | 0.08  | 0.25  |
| United Arab Emirates             | 51.9     | 46.48    | 54.71    | 61.7     | 48.42    | 66.54    | 0.49  | 0.49  | 0.48  |

|                                  |        |        |        |        |        |        |      |       |       |
|----------------------------------|--------|--------|--------|--------|--------|--------|------|-------|-------|
| United Kingdom                   | 315.1  | 322.56 | 307.21 | 326.16 | 323.99 | 328.37 | 0.28 | 0.20  | 0.36  |
| United States                    | 309.54 | 302.07 | 317.4  | 307.41 | 302.69 | 312.29 | 0.07 | 0.03  | 0.10  |
| Uruguay                          | 227.48 | 210.68 | 245.32 | 390.82 | 401.16 | 379.75 | 0.93 | 1.05  | 0.79  |
| Uzbekistan                       | 20.63  | 20.49  | 20.77  | 37.37  | 30.4   | 44.58  | 1.43 | 1.07  | 1.78  |
| Vanuatu                          | 305.22 | 235.56 | 371.09 | 354.18 | 306.29 | 400.88 | 0.32 | 0.45  | 0.25  |
| Venezuela                        | 74.81  | 77.86  | 71.8   | 138.59 | 137.71 | 139.48 | 0.79 | 0.88  | 0.75  |
| Vietnam                          | 176.59 | 155.29 | 198.54 | 192.69 | 180.24 | 205.41 | 0.58 | 0.78  | 0.43  |
| Virgin Islands, U.S.             | 240.39 | 212.71 | 269.7  | 570.81 | 484.56 | 665.61 | 0.78 | 0.78  | 0.78  |
| Yemen                            | 630.75 | 699.8  | 560.43 | 417.93 | 459.78 | 376.95 | 0.40 | 0.41  | 0.40  |
| Zambia                           | 538.28 | 627.59 | 447.46 | 532.13 | 453.76 | 610.73 | 0.66 | 0.27  | 1.18  |
| Zimbabwe                         | 246.32 | 302.4  | 189.77 | 290.64 | 310.88 | 269.8  | 0.04 | -0.10 | 0.25  |
| <b>Peripheral artery disease</b> |        |        |        |        |        |        |      |       |       |
| Afghanistan                      | 2.04   | 2.02   | 2.06   | 2.45   | 2.5    | 2.4    | 0.98 | 1.14  | 0.85  |
| Albania                          | 5.42   | 5.71   | 5.15   | 12.63  | 12.63  | 12.64  | 1.62 | 1.55  | 1.68  |
| Algeria                          | 3.43   | 3.5    | 3.36   | 6.56   | 6.46   | 6.66   | 1.73 | 1.61  | 1.85  |
| American Samoa                   | 4.77   | 3.99   | 5.5    | 12.26  | 4.94   | 19.55  | 2.13 | 0.31  | 3.79  |
| Andorra                          | 40.99  | 31.85  | 50.64  | 57.8   | 45.89  | 70.21  | 0.42 | 0.48  | 0.37  |
| Angola                           | 3.21   | 3.53   | 2.89   | 3.88   | 4.17   | 3.58   | 1.49 | 1.35  | 1.65  |
| Antigua and Barbuda              | 12.48  | 11.22  | 13.84  | 18.24  | 15.27  | 21.49  | 0.62 | 0.49  | 0.74  |
| Argentina                        | 12.58  | 11.26  | 13.96  | 15.06  | 15.18  | 14.93  | 0.42 | 0.54  | 0.31  |
| Armenia                          | 6.11   | 7.01   | 5.16   | 12.96  | 14.27  | 11.45  | 1.36 | 1.29  | 1.43  |
| Australia                        | 38.87  | 34.34  | 43.43  | 47.21  | 42.82  | 51.61  | 0.41 | 0.38  | 0.44  |
| Austria                          | 37.84  | 34.75  | 41.2   | 77.77  | 71.1   | 84.78  | 1.45 | 1.40  | 1.49  |
| Azerbaijan                       | 4.6    | 5.49   | 3.66   | 7.32   | 7.95   | 6.68   | 1.39 | 1.20  | 1.73  |
| Bahrain                          | 5.96   | 3.64   | 7.67   | 12.41  | 9.73   | 14.06  | 2.02 | 2.74  | 1.72  |
| Bangladesh                       | 2.81   | 2.67   | 2.94   | 4.53   | 4.42   | 4.63   | 2.74 | 3.15  | 2.41  |
| Barbados                         | 43.14  | 53.88  | 31.56  | 78.11  | 99.16  | 55.22  | 0.72 | 0.69  | 0.71  |
| Belarus                          | 11.91  | 14.29  | 9.22   | 32.74  | 29.56  | 36.43  | 1.38 | 0.94  | 2.19  |
| Belgium                          | 17     | 17.62  | 16.36  | 34.89  | 32.02  | 37.87  | 1.34 | 1.04  | 1.69  |
| Belize                           | 3.55   | 2.84   | 4.25   | 4.43   | 3.59   | 5.28   | 0.49 | 0.59  | 0.42  |
| Benin                            | 3.63   | 4.03   | 3.21   | 3.51   | 3.9    | 3.11   | 0.88 | 0.90  | 0.89  |
| Bermuda                          | 20.08  | 17.44  | 22.75  | 31.19  | 32.65  | 29.72  | 0.97 | 1.24  | 0.73  |
| Bhutan                           | 3.16   | 3      | 3.3    | 6.07   | 5.58   | 6.48   | 3.31 | 3.52  | 3.10  |
| Bolivia                          | 2.54   | 2.58   | 2.5    | 4.07   | 4.11   | 4.02   | 2.46 | 2.45  | 2.47  |
| Bosnia and Herzegovina           | 8.28   | 8.85   | 7.72   | 19.78  | 20.35  | 19.21  | 1.42 | 1.25  | 1.60  |
| Botswana                         | 7.25   | 6.78   | 7.73   | 16.55  | 13.31  | 19.8   | 0.77 | 0.56  | 0.94  |
| Brazil                           | 8.37   | 7.31   | 9.44   | 23.01  | 20.97  | 25.12  | 2.47 | 2.60  | 2.36  |
| Brunei                           | 3.62   | 2.85   | 4.32   | 6.88   | 5.62   | 8.07   | 0.94 | 1.00  | 0.91  |
| Bulgaria                         | 13.15  | 13.85  | 12.43  | 25.87  | 26.74  | 24.96  | 0.92 | 0.85  | 0.99  |
| Burkina Faso                     | 3.57   | 3.87   | 3.25   | 3.17   | 3.8    | 2.53   | 0.66 | 0.82  | 0.48  |
| Burundi                          | 4.79   | 4.63   | 4.97   | 3.43   | 3.4    | 3.47   | 0.62 | 0.69  | 0.56  |
| Cambodia                         | 3.72   | 4.02   | 3.39   | 5.81   | 6.51   | 5.07   | 2.81 | 3.06  | 2.57  |
| Cameroon                         | 3.93   | 4.08   | 3.79   | 3.94   | 4.24   | 3.63   | 0.35 | 0.42  | 0.28  |
| Canada                           | 34.53  | 29.3   | 39.85  | 43.08  | 41.28  | 44.9   | 0.30 | 0.40  | 0.23  |
| Cape Verde                       | 5.9    | 6.79   | 4.92   | 8.15   | 10.67  | 5.57   | 1.14 | 1.46  | 0.75  |
| Central African Republic         | 4.79   | 5.09   | 4.47   | 4.99   | 5.35   | 4.62   | 0.29 | 0.29  | 0.30  |
| Chad                             | 3.35   | 3.54   | 3.15   | 2.89   | 3.14   | 2.64   | 0.27 | 0.31  | 0.24  |
| Chile                            | 11.4   | 10.43  | 12.39  | 32.77  | 30.42  | 35.18  | 2.31 | 2.15  | 2.45  |
| China                            | 5.65   | 6.06   | 5.27   | 11.71  | 11.93  | 11.51  | 2.07 | 2.20  | 2.02  |
| Colombia                         | 3.46   | 3.49   | 3.42   | 6.37   | 6.71   | 6.01   | 1.46 | 1.38  | 1.48  |
| Comoros                          | 4.82   | 5.21   | 4.43   | 4.25   | 4.55   | 3.97   | 0.91 | 0.89  | 0.94  |
| Congo                            | 5.89   | 6.19   | 5.59   | 6.16   | 7.1    | 5.22   | 0.49 | 0.46  | 0.50  |
| Costa Rica                       | 3.84   | 3.47   | 4.22   | 8.49   | 7.69   | 9.28   | 1.31 | 1.30  | 1.32  |
| Cote d'Ivoire                    | 3.42   | 3.21   | 3.61   | 3.91   | 3.62   | 4.18   | 0.63 | 0.64  | 0.63  |
| Croatia                          | 12.48  | 14.32  | 10.52  | 77.3   | 71.97  | 83.02  | 5.71 | 4.21  | 7.85  |
| Cuba                             | 18.79  | 17.78  | 19.78  | 65.43  | 58.52  | 72.27  | 2.34 | 2.14  | 2.51  |
| Cyprus                           | 20.35  | 19.53  | 21.19  | 21.69  | 20.67  | 22.78  | 0.24 | 0.24  | 0.24  |
| Czech Republic                   | 15.3   | 16.35  | 14.18  | 46.86  | 41.92  | 51.95  | 2.81 | 2.09  | 3.70  |
| Democratic Republic of the Congo | 3.44   | 3.96   | 2.91   | 3.3    | 3.68   | 2.93   | 0.56 | 0.50  | 0.65  |
| Denmark                          | 63.69  | 62.55  | 64.86  | 51.56  | 53.65  | 49.44  | 0.00 | 0.04  | -0.04 |
| Djibouti                         | 4.13   | 4.4    | 3.86   | 7.19   | 7.06   | 7.33   | 1.44 | 1.30  | 1.63  |



|                                |       |       |       |       |       |        |       |       |       |
|--------------------------------|-------|-------|-------|-------|-------|--------|-------|-------|-------|
| Dominica                       | 8.33  | 6.27  | 10.4  | 21.99 | 16.99 | 27.07  | 1.39  | 1.69  | 1.18  |
| Dominican Republic             | 2.57  | 2.5   | 2.65  | 5.16  | 5.1   | 5.22   | 1.70  | 1.80  | 1.61  |
| Ecuador                        | 2.28  | 2.28  | 2.28  | 4.23  | 4.28  | 4.18   | 1.59  | 1.67  | 1.52  |
| Egypt                          | 4.69  | 5.01  | 4.37  | 5.93  | 6.29  | 5.58   | 1.19  | 1.26  | 1.13  |
| El Salvador                    | 2.13  | 2.16  | 2.1   | 4.26  | 4.25  | 4.28   | 1.97  | 1.91  | 2.00  |
| Equatorial Guinea              | 5.7   | 6.18  | 5.25  | 8.08  | 7.2   | 8.91   | 1.71  | 1.23  | 2.26  |
| Eritrea                        | 2.32  | 2.71  | 1.92  | 3.38  | 3.95  | 2.82   | 1.61  | 1.56  | 1.70  |
| Estonia                        | 11.62 | 14.5  | 8.34  | 34.81 | 36.55 | 32.78  | 2.83  | 2.01  | 4.32  |
| Ethiopia                       | 3.77  | 3.62  | 3.92  | 4.38  | 4.46  | 4.31   | 2.67  | 2.85  | 2.52  |
| Federated States of Micronesia | 4.86  | 4.6   | 5.11  | 8.23  | 7.49  | 8.94   | 1.28  | 1.19  | 1.36  |
| Fiji                           | 3.6   | 3.58  | 3.62  | 8.47  | 9.65  | 7.32   | 1.05  | 1.26  | 0.82  |
| Finland                        | 38.08 | 38.81 | 37.3  | 72.71 | 75.01 | 70.34  | 1.19  | 1.15  | 1.22  |
| France                         | 15.93 | 17.33 | 14.46 | 29.13 | 27.85 | 30.49  | 1.03  | 0.73  | 1.41  |
| Gabon                          | 11.26 | 10.62 | 11.94 | 10.89 | 11.68 | 10.11  | 0.45  | 0.61  | 0.31  |
| Georgia                        | 9.99  | 11.67 | 8.15  | 21.49 | 20.77 | 22.28  | 1.17  | 0.92  | 1.63  |
| Germany                        | 25.46 | 26.34 | 24.52 | 105.5 | 89.2  | 122.35 | 3.67  | 2.82  | 4.63  |
| Ghana                          | 3.2   | 3.47  | 2.94  | 4.02  | 4.2   | 3.83   | 1.15  | 1.18  | 1.15  |
| Greece                         | 17.11 | 17.22 | 17    | 20.48 | 21.22 | 19.7   | 0.21  | 0.24  | 0.18  |
| Greenland                      | 18.8  | 15.29 | 21.84 | 40.38 | 31.27 | 48.29  | 2.00  | 1.92  | 2.04  |
| Grenada                        | 14.66 | 12.1  | 17.29 | 22.89 | 21.7  | 24.07  | 0.71  | 1.01  | 0.50  |
| Guam                           | 5.06  | 5.16  | 4.98  | 34.7  | 19.68 | 49.31  | 4.11  | 1.82  | 6.33  |
| Guatemala                      | 1.73  | 1.61  | 1.85  | 2.59  | 2.62  | 2.56   | 1.75  | 2.09  | 1.47  |
| Guinea                         | 3.82  | 4.02  | 3.62  | 3.68  | 3.89  | 3.46   | 0.82  | 0.88  | 0.78  |
| Guinea-Bissau                  | 4.22  | 4.47  | 3.97  | 3.95  | 4.22  | 3.67   | 0.45  | 0.45  | 0.45  |
| Guyana                         | 4.15  | 2.02  | 6.35  | 7.64  | 6.61  | 8.66   | 1.09  | 2.81  | 0.53  |
| Haiti                          | 3.39  | 3.1   | 3.68  | 4.46  | 4.41  | 4.51   | 1.54  | 1.70  | 1.40  |
| Honduras                       | 1.82  | 1.83  | 1.8   | 3.25  | 3.15  | 3.34   | 1.81  | 1.63  | 2.00  |
| Hungary                        | 23.39 | 19.92 | 27.14 | 71.13 | 58.78 | 84.73  | 2.90  | 2.53  | 3.25  |
| Iceland                        | 14.15 | 16.24 | 12.09 | 19.04 | 20.48 | 17.56  | 0.56  | 0.49  | 0.66  |
| India                          | 3.79  | 3.65  | 3.93  | 6.64  | 6.18  | 7.06   | 2.00  | 2.17  | 1.85  |
| Indonesia                      | 5.18  | 5.39  | 4.96  | 7.91  | 8.27  | 7.55   | 1.36  | 1.46  | 1.29  |
| Iran                           | 3.24  | 2.93  | 3.54  | 5.53  | 4.94  | 6.11   | 2.26  | 2.42  | 2.14  |
| Iraq                           | 4.02  | 3.84  | 4.2   | 3.67  | 3.63  | 3.71   | 0.14  | 0.28  | 0.03  |
| Ireland                        | 49.15 | 40.88 | 57.49 | 33.35 | 30.05 | 36.74  | -0.17 | -0.09 | -0.22 |
| Israel                         | 21.26 | 17.29 | 25.25 | 40.84 | 35.39 | 46.38  | 1.32  | 1.45  | 1.24  |
| Italy                          | 30.95 | 24.22 | 38.1  | 46.17 | 44.35 | 48.09  | 0.64  | 0.90  | 0.46  |
| Jamaica                        | 17.07 | 14.79 | 19.41 | 35.67 | 34.37 | 36.99  | 0.99  | 1.30  | 0.75  |
| Japan                          | 12.74 | 13.77 | 11.67 | 29.17 | 30.67 | 27.6   | 1.03  | 1.01  | 1.07  |
| Jordan                         | 3.19  | 3.12  | 3.26  | 3.69  | 3.65  | 3.73   | 0.74  | 0.82  | 0.67  |
| Kazakhstan                     | 9.66  | 10.31 | 8.97  | 13.23 | 12.38 | 14.14  | 0.49  | 0.37  | 0.65  |
| Kenya                          | 3.4   | 3.47  | 3.33  | 3.93  | 4.11  | 3.74   | 0.60  | 0.68  | 0.53  |
| Kiribati                       | 4.48  | 4.93  | 4.01  | 7.07  | 6.75  | 7.4    | 1.24  | 1.11  | 1.45  |
| Kuwait                         | 1.76  | 1.4   | 2.07  | 2.4   | 2.18  | 2.57   | 0.69  | 0.82  | 0.61  |
| Kyrgyzstan                     | 10.05 | 9.75  | 10.35 | 10.12 | 7.93  | 12.37  | 0.42  | 0.21  | 0.62  |
| Laos                           | 4.96  | 5.31  | 4.61  | 5.98  | 6.28  | 5.66   | 2.33  | 2.41  | 2.28  |
| Latvia                         | 12.19 | 14.83 | 9.16  | 43.19 | 42.51 | 43.97  | 3.12  | 2.24  | 4.73  |
| Lebanon                        | 6.13  | 5.7   | 6.58  | 8.74  | 8.44  | 9.03   | 1.48  | 1.29  | 1.66  |
| Lesotho                        | 10.51 | 9.52  | 11.56 | 17.4  | 16.26 | 18.56  | 0.04  | 0.04  | 0.04  |
| Liberia                        | 3.41  | 3.43  | 3.38  | 3.61  | 3.84  | 3.38   | 1.75  | 1.75  | 1.74  |
| Libya                          | 3.23  | 3.19  | 3.26  | 5.36  | 5.31  | 5.41   | 0.76  | 0.95  | 0.62  |
| Lithuania                      | 12.32 | 14.42 | 9.98  | 61.57 | 45.78 | 79.93  | 4.04  | 2.23  | 6.95  |
| Luxembourg                     | 22.43 | 21.24 | 23.67 | 25.46 | 24.31 | 26.61  | 0.62  | 0.54  | 0.70  |
| Macedonia                      | 7.44  | 7.57  | 7.3   | 14.29 | 14.81 | 13.75  | 1.07  | 1.11  | 1.03  |
| Madagascar                     | 4.91  | 4.57  | 5.25  | 4.89  | 4.94  | 4.83   | 0.88  | 1.09  | 0.70  |
| Malawi                         | 3.5   | 3.77  | 3.22  | 4.37  | 4.68  | 4.06   | 1.72  | 1.78  | 1.68  |
| Malaysia                       | 5.02  | 5     | 5.03  | 8.79  | 8.25  | 9.35   | 0.86  | 0.88  | 0.86  |
| Maldives                       | 5.1   | 4.74  | 5.45  | 7.8   | 7.81  | 7.78   | 3.08  | 3.62  | 2.66  |
| Mali                           | 4.03  | 4.17  | 3.88  | 3.1   | 3.5   | 2.69   | 0.37  | 0.48  | 0.25  |
| Malta                          | 21.53 | 18.79 | 24.36 | 45.84 | 43.04 | 48.67  | 1.14  | 1.30  | 1.01  |
| Marshall Islands               | 3.73  | 3.38  | 4.06  | 10.97 | 8.76  | 13.11  | 2.54  | 2.08  | 2.93  |
| Mauritania                     | 3.7   | 4.08  | 3.31  | 4.02  | 4.59  | 3.47   | 1.01  | 1.03  | 0.99  |

|                                  |       |       |       |       |       |       |      |       |       |
|----------------------------------|-------|-------|-------|-------|-------|-------|------|-------|-------|
| Mauritius                        | 7.14  | 7.67  | 6.61  | 16.75 | 17.19 | 16.3  | 1.30 | 1.15  | 1.45  |
| Mexico                           | 5.47  | 5.6   | 5.35  | 7.55  | 7.94  | 7.16  | 0.82 | 0.82  | 0.80  |
| Moldova                          | 8.09  | 9.18  | 6.9   | 27.3  | 22.04 | 32.99 | 3.11 | 1.99  | 4.71  |
| Mongolia                         | 5.06  | 4.57  | 5.57  | 6.57  | 5.4   | 7.76  | 0.90 | 1.01  | 0.82  |
| Montenegro                       | 10.89 | 12.18 | 9.58  | 18.58 | 19.52 | 17.62 | 0.65 | 0.60  | 0.73  |
| Morocco                          | 4.27  | 3.98  | 4.55  | 7.26  | 6.78  | 7.75  | 1.56 | 1.56  | 1.57  |
| Mozambique                       | 4.13  | 4.43  | 3.8   | 5.02  | 5.19  | 4.84  | 1.25 | 1.15  | 1.38  |
| Myanmar                          | 5.88  | 6.38  | 5.36  | 8.88  | 9.63  | 8.08  | 1.66 | 1.86  | 1.50  |
| Namibia                          | 9.28  | 8.2   | 10.41 | 11.97 | 10.44 | 13.6  | 0.51 | 0.53  | 0.49  |
| Nepal                            | 3.45  | 3.78  | 3.11  | 5.91  | 5.66  | 6.18  | 2.92 | 2.67  | 3.24  |
| Netherlands                      | 18.52 | 17.99 | 19.06 | 58.4  | 51.72 | 65.18 | 2.44 | 2.03  | 2.84  |
| New Zealand                      | 35.86 | 31.02 | 40.84 | 35.51 | 35.39 | 35.64 | 0.18 | 0.29  | 0.10  |
| Nicaragua                        | 1.75  | 1.82  | 1.69  | 3.17  | 3.27  | 3.07  | 2.22 | 2.24  | 2.21  |
| Niger                            | 2.72  | 2.81  | 2.62  | 3.07  | 3.09  | 3.05  | 1.64 | 1.58  | 1.73  |
| Nigeria                          | 3.38  | 3.57  | 3.19  | 3.49  | 3.69  | 3.3   | 0.88 | 0.92  | 0.85  |
| North Korea                      | 4.76  | 6.36  | 3.06  | 9.19  | 11.73 | 6.53  | 1.05 | 1.04  | 1.19  |
| Northern Mariana Islands         | 3.47  | 3.31  | 3.61  | 11.19 | 10.23 | 12.15 | 3.06 | 3.21  | 2.94  |
| Norway                           | 16.4  | 16.21 | 16.59 | 32.19 | 30.85 | 33.51 | 1.57 | 1.32  | 1.81  |
| Oman                             | 2.23  | 2.55  | 1.97  | 3.17  | 3.36  | 3.07  | 1.42 | 1.37  | 1.59  |
| Pakistan                         | 4.14  | 3.57  | 4.66  | 5.79  | 5.23  | 6.32  | 1.11 | 1.32  | 0.95  |
| Palestine                        | 2.22  | 2.34  | 2.11  | 3.14  | 3.2   | 3.09  | 1.15 | 1.18  | 1.15  |
| Panama                           | 9.51  | 7.47  | 11.5  | 12.84 | 11.79 | 13.88 | 0.43 | 0.69  | 0.26  |
| Papua New Guinea                 | 2.81  | 2.8   | 2.83  | 4.66  | 4.29  | 5.01  | 1.27 | 1.07  | 1.47  |
| Paraguay                         | 2.9   | 3.07  | 2.73  | 7.09  | 6.48  | 7.69  | 1.62 | 1.39  | 1.88  |
| Peru                             | 2.33  | 2.35  | 2.31  | 4.13  | 4.23  | 4.03  | 2.65 | 2.62  | 2.67  |
| Philippines                      | 4.41  | 4.62  | 4.2   | 7.74  | 7.55  | 7.92  | 1.42 | 1.26  | 1.60  |
| Poland                           | 59.56 | 37.6  | 82.65 | 74.07 | 57.44 | 91.96 | 0.44 | 0.74  | 0.30  |
| Portugal                         | 30.08 | 26.43 | 34    | 62.85 | 55.62 | 70.57 | 1.52 | 1.46  | 1.57  |
| Puerto Rico                      | 16.34 | 15.82 | 16.89 | 36.96 | 37.99 | 35.86 | 1.43 | 1.35  | 1.45  |
| Qatar                            | 2.23  | 2.05  | 2.32  | 2.14  | 1.9   | 2.23  | 0.32 | 0.26  | 0.34  |
| Romania                          | 30.42 | 19.9  | 41.25 | 49.77 | 34.63 | 65.89 | 0.71 | 0.85  | 0.65  |
| Russia                           | 10.22 | 13.22 | 6.81  | 79.57 | 64.68 | 97.05 | 6.27 | 3.78  | 11.76 |
| Rwanda                           | 3.35  | 3.48  | 3.22  | 4.02  | 4.28  | 3.74  | 1.83 | 1.94  | 1.70  |
| Saint Lucia                      | 14.24 | 14.42 | 14.06 | 28.36 | 33.12 | 23.41 | 1.36 | 1.71  | 0.97  |
| Saint Vincent and the Grenadines | 8.5   | 14.09 | 2.85  | 13.3  | 11.93 | 14.64 | 0.58 | -0.09 | 3.94  |
| Samoa                            | 5.42  | 5.33  | 5.51  | 11.69 | 10.88 | 12.46 | 1.51 | 1.08  | 1.93  |
| Sao Tome and Principe            | 5.78  | 6.03  | 5.51  | 4.59  | 5.27  | 3.9   | 0.43 | 0.56  | 0.30  |
| Saudi Arabia                     | 2.69  | 2.96  | 2.47  | 3.54  | 3.63  | 3.47  | 1.30 | 1.31  | 1.31  |
| Senegal                          | 3.37  | 3.53  | 3.22  | 3.56  | 3.98  | 3.13  | 1.10 | 1.26  | 0.95  |
| Serbia                           | 12.41 | 12.28 | 12.53 | 23.76 | 24.18 | 23.31 | 0.87 | 0.90  | 0.83  |
| Seychelles                       | 10.34 | 11.65 | 9.03  | 13.4  | 14.86 | 11.97 | 0.44 | 0.36  | 0.52  |
| Sierra Leone                     | 3.68  | 3.51  | 3.85  | 3.43  | 3.5   | 3.35  | 0.67 | 0.72  | 0.63  |
| Singapore                        | 7.6   | 8.65  | 6.57  | 26.11 | 28    | 24.16 | 2.98 | 2.62  | 3.38  |
| Slovakia                         | 11.6  | 11.97 | 11.21 | 27.66 | 26.16 | 29.24 | 1.86 | 1.47  | 2.28  |
| Slovenia                         | 12.08 | 13.69 | 10.38 | 21.46 | 23.51 | 19.38 | 1.08 | 0.93  | 1.27  |
| Solomon Islands                  | 3.4   | 2.91  | 3.86  | 5.54  | 4.39  | 6.65  | 1.13 | 0.95  | 1.27  |
| Somalia                          | 4.69  | 5     | 4.37  | 3.96  | 4.2   | 3.72  | 0.27 | 0.26  | 0.28  |
| South Africa                     | 21.58 | 18.52 | 24.72 | 39.93 | 31.44 | 48.71 | 0.76 | 0.62  | 0.86  |
| South Korea                      | 7.18  | 5.88  | 8.48  | 14.13 | 14.38 | 13.88 | 1.26 | 1.75  | 0.91  |
| South Sudan                      | 4.22  | 4.37  | 4.07  | 4.95  | 5.05  | 4.86  | 0.93 | 0.91  | 0.96  |
| Spain                            | 21.71 | 20.34 | 23.14 | 40.9  | 38.12 | 43.76 | 1.25 | 1.10  | 1.39  |
| Sri Lanka                        | 7.74  | 7.22  | 8.25  | 13.79 | 13.76 | 13.83 | 1.52 | 1.56  | 1.42  |
| Sudan                            | 2.67  | 2.64  | 2.7   | 3.25  | 3.23  | 3.28  | 1.37 | 1.43  | 1.33  |
| Suriname                         | 3.04  | 2.44  | 3.62  | 4.76  | 4.17  | 5.36  | 0.79 | 1.04  | 0.63  |
| Swaziland                        | 8.93  | 6.8   | 11.31 | 16.52 | 13.71 | 19.4  | 0.36 | 0.43  | 0.29  |
| Sweden                           | 35.36 | 35.93 | 34.77 | 41.7  | 42.41 | 40.99 | 0.42 | 0.35  | 0.48  |
| Switzerland                      | 39.16 | 34.14 | 44.41 | 34.48 | 30.93 | 38.11 | 0.09 | 0.06  | 0.13  |
| Syria                            | 3.3   | 3.1   | 3.5   | 4.81  | 4.76  | 4.86  | 0.21 | 0.65  | -0.03 |
| Taiwan                           | 6.41  | 6.35  | 6.46  | 13.07 | 14.01 | 12.12 | 1.02 | 1.12  | 0.89  |
| Tajikistan                       | 4.08  | 4.51  | 3.63  | 3.81  | 3.59  | 4.03  | 0.83 | 0.59  | 1.13  |
| Tanzania                         | 4.23  | 4.29  | 4.17  | 5.04  | 4.89  | 5.2   | 1.29 | 1.23  | 1.37  |

|                      |       |       |       |       |       |       |       |       |       |
|----------------------|-------|-------|-------|-------|-------|-------|-------|-------|-------|
| Thailand             | 6.42  | 6.72  | 6.12  | 15.3  | 15.96 | 14.62 | 1.32  | 1.42  | 1.24  |
| The Bahamas          | 11.68 | 9.15  | 14.24 | 25.73 | 26.47 | 24.97 | 1.43  | 2.06  | 0.99  |
| The Gambia           | 3.06  | 2.83  | 3.28  | 2.96  | 2.87  | 3.04  | 0.79  | 0.98  | 0.63  |
| Timor-Leste          | 2.54  | 2.67  | 2.41  | 6.23  | 6.55  | 5.91  | 5.39  | 5.51  | 5.29  |
| Togo                 | 3.22  | 3.45  | 3     | 3.24  | 3.49  | 2.98  | 0.53  | 0.64  | 0.44  |
| Tonga                | 6.08  | 6.2   | 5.96  | 11.2  | 10.97 | 11.43 | 1.03  | 1.05  | 1.02  |
| Trinidad and Tobago  | 10.52 | 8.99  | 12.07 | 20.44 | 21.59 | 19.26 | 0.85  | 1.41  | 0.45  |
| Tunisia              | 5.13  | 4.61  | 5.65  | 8.98  | 8.63  | 9.34  | 1.35  | 1.63  | 1.13  |
| Turkey               | 13.75 | 10.07 | 17.53 | 17.04 | 13.8  | 20.4  | 1.35  | 1.57  | 1.23  |
| Turkmenistan         | 4.53  | 5.09  | 3.96  | 7.61  | 6.72  | 8.53  | 1.81  | 1.34  | 2.44  |
| Uganda               | 3.65  | 3.57  | 3.72  | 3.7   | 3.56  | 3.84  | 1.07  | 1.10  | 1.06  |
| Ukraine              | 13.75 | 16.55 | 10.48 | 29.56 | 28.81 | 30.45 | 0.99  | 0.68  | 1.60  |
| United Arab Emirates | 1.62  | 1.61  | 1.62  | 2.18  | 1.47  | 2.44  | 0.69  | 0.30  | 0.84  |
| United Kingdom       | 64.98 | 61.29 | 68.89 | 55.83 | 58.91 | 52.67 | 0.06  | 0.15  | -0.03 |
| United States        | 31.48 | 30.25 | 32.78 | 46.07 | 44.38 | 47.82 | 0.57  | 0.51  | 0.63  |
| Uruguay              | 14.84 | 14.07 | 15.66 | 16.27 | 18.05 | 14.36 | 0.23  | 0.38  | 0.06  |
| Uzbekistan           | 4.31  | 5.02  | 3.59  | 5.65  | 6.05  | 5.23  | 0.75  | 0.68  | 0.89  |
| Vanuatu              | 4.7   | 3.88  | 5.47  | 6.53  | 5.54  | 7.49  | 0.59  | 0.60  | 0.59  |
| Venezuela            | 4.09  | 4.4   | 3.78  | 6.39  | 7.14  | 5.64  | 0.51  | 0.73  | 0.34  |
| Vietnam              | 7.3   | 8.52  | 6.04  | 10.65 | 12.4  | 8.85  | 1.12  | 1.25  | 1.04  |
| Virgin Islands, U.S. | 9.3   | 5.35  | 13.47 | 46.94 | 60.38 | 32.17 | 2.78  | 7.85  | 0.72  |
| Yemen                | 2.35  | 2.55  | 2.14  | 2.78  | 2.81  | 2.76  | 1.52  | 1.37  | 1.71  |
| Zambia               | 3.78  | 4.11  | 3.44  | 4.73  | 4.81  | 4.64  | 1.11  | 1.08  | 1.18  |
| Zimbabwe             | 4.01  | 4.14  | 3.87  | 4.16  | 4.18  | 4.14  | -0.08 | -0.11 | -0.05 |

eFigure 1a.

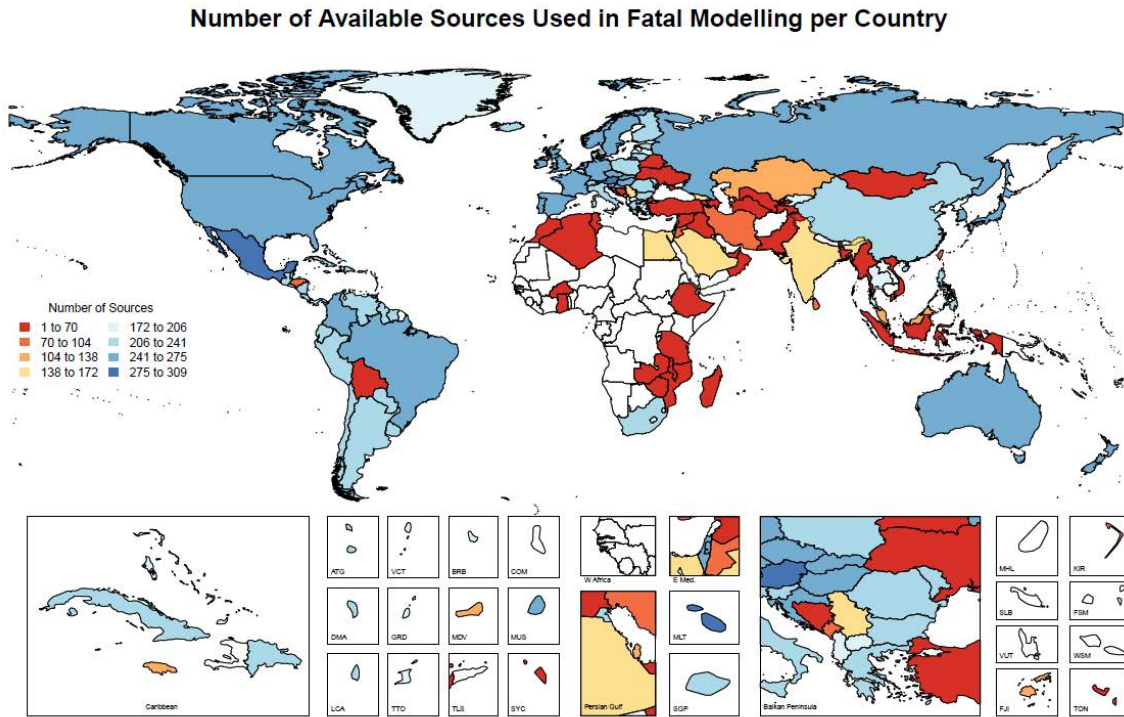

eFigure 1b.

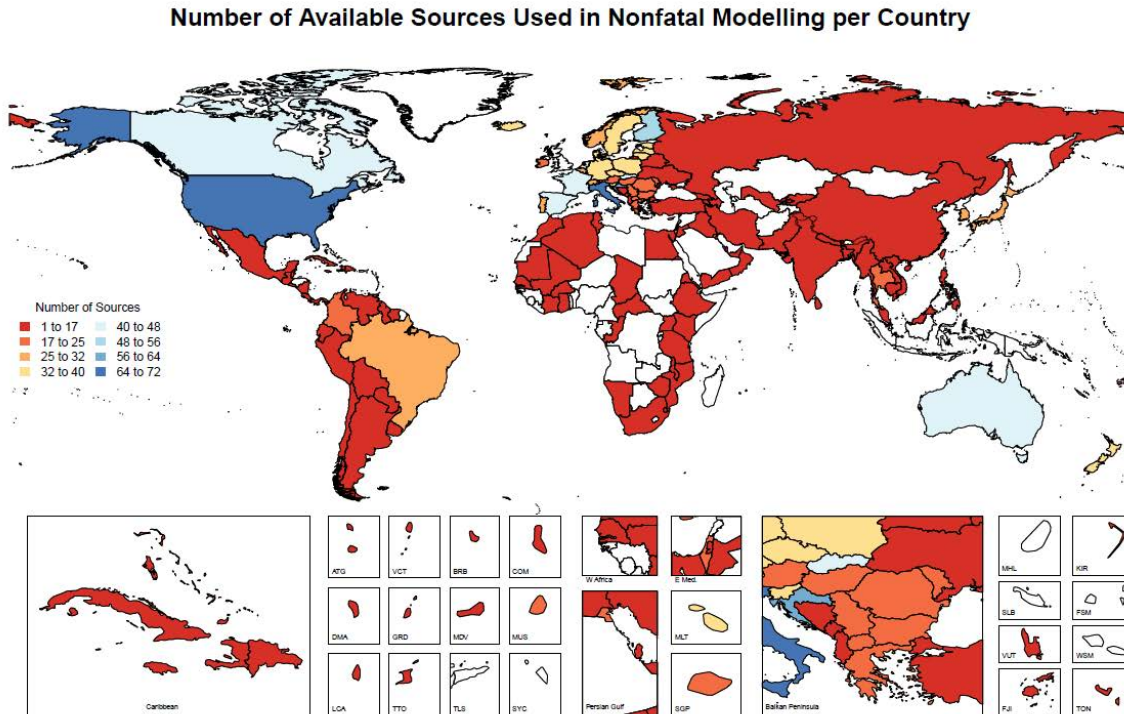

eFigure 2a.

**All Cardiovascular Disease: Age-Standardized Median Percent Change in Prevalent Cases per 100,000 Persons, Both Sexes, 1990–2015**

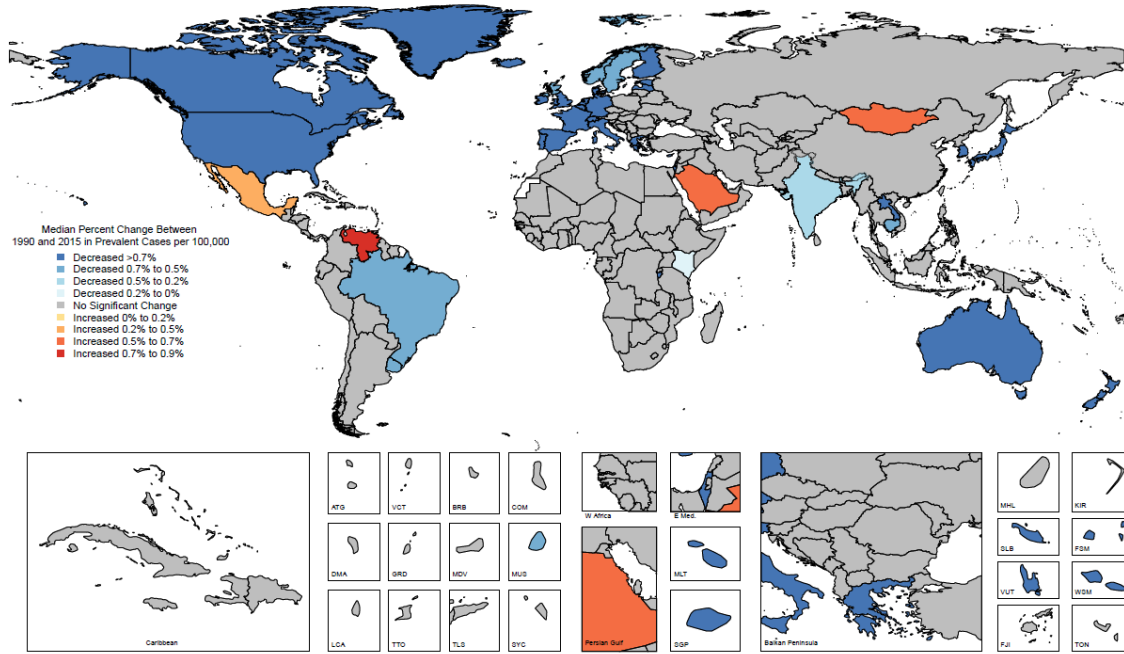

eFigure 2b.

**All Cardiovascular Disease: Age-Standardized Median Percent Change in Deaths per 100,000 Persons, Both Sexes, 1990–2015**

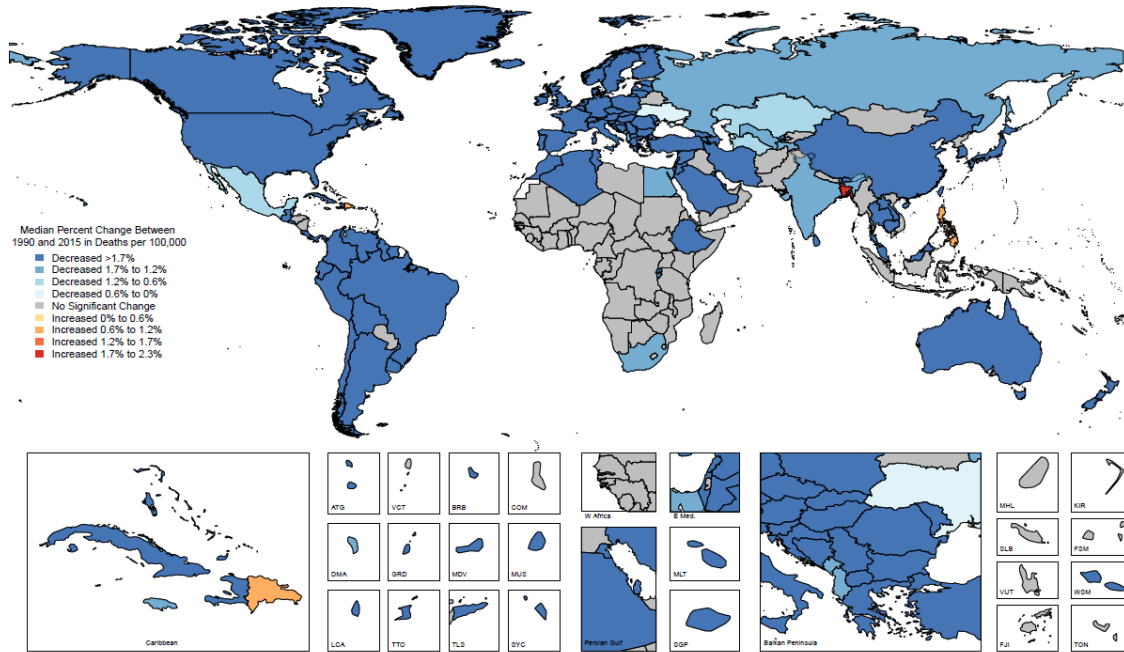

eFigure 3. Rankings of Cardiovascular Disease Subcauses by Age-Standardized DALYs, Both Sexes, 2015

|                                               | Global | Central Asia | Eastern Europe | Central Europe | Western Europe | High-income North America | High-income Asia Pacific | Australasia | Southern Latin America | Andean Latin America | Central Latin America | Tropical Latin America | Caribbean | Oceania | East Asia | Southeast Asia | South Asia | North Africa and Middle East | Central Sub-Saharan Africa | Eastern Sub-Saharan Africa | Southern Sub-Saharan Africa | Western Sub-Saharan Africa |
|-----------------------------------------------|--------|--------------|----------------|----------------|----------------|---------------------------|--------------------------|-------------|------------------------|----------------------|-----------------------|------------------------|-----------|---------|-----------|----------------|------------|------------------------------|----------------------------|----------------------------|-----------------------------|----------------------------|
| Ischemic heart disease                        | 1      | 1            | 1              | 1              | 1              | 1                         | 1                        | 1           | 1                      | 1                    | 1                     | 1                      | 1         | 1       | 1         | 1              | 1          | 1                            | 1                          | 1                          | 1                           | 1                          |
| Hemorrhagic and other stroke                  | 2      | 2            | 3              | 3              | 2              | 3                         | 2                        | 2           | 2                      | 2                    | 2                     | 2                      | 2         | 2       | 2         | 2              | 2          | 2                            | 2                          | 2                          | 2                           | 2                          |
| Ischemic stroke                               | 3      | 3            | 2              | 2              | 3              | 2                         | 3                        | 3           | 3                      | 3                    | 3                     | 3                      | 3         | 3       | 3         | 3              | 3          | 3                            | 3                          | 4                          | 3                           | 3                          |
| Hypertensive heart disease                    | 4      | 4            | 5              | 6              | 7              | 5                         | 7                        | 9           | 5                      | 5                    | 5                     | 6                      | 4         | 4       | 4         | 4              | 4          | 5                            | 4                          | 5                          | 4                           | 5                          |
| Other cardiovascular and circulatory diseases | 5      | 6            | 6              | 5              | 4              | 4                         | 4                        | 4           | 4                      | 4                    | 4                     | 4                      | 5         | 5       | 5         | 5              | 8          | 4                            | 5                          | 3                          | 5                           | 4                          |
| Rheumatic heart disease                       | 6      | 5            | 9              | 9              | 10             | 9                         | 9                        | 10          | 8                      | 8                    | 10                    | 9                      | 7         | 6       | 6         | 6              | 5          | 7                            | 6                          | 6                          | 7                           | 6                          |
| Cardiomyopathy and myocarditis                | 7      | 7            | 4              | 4              | 6              | 6                         | 6                        | 5           | 6                      | 6                    | 6                     | 5                      | 6         | 7       | 7         | 7              | 7          | 6                            | 7                          | 7                          | 6                           | 7                          |
| Atrial fibrillation and flutter               | 8      | 8            | 7              | 7              | 5              | 7                         | 8                        | 6           | 9                      | 7                    | 7                     | 8                      | 9         | 10      | 8         | 8              | 6          | 9                            | 10                         | 10                         | 11                          | 9                          |
| Aortic aneurysm                               | 9      | 9            | 8              | 8              | 8              | 8                         | 5                        | 7           | 7                      | 10                   | 8                     | 7                      | 8         | 9       | 9         | 10             | 9          | 10                           | 9                          | 9                          | 8                           | 10                         |
| Endocarditis                                  | 10     | 10           | 11             | 11             | 11             | 11                        | 10                       | 11          | 10                     | 9                    | 9                     | 10                     | 10        | 8       | 11        | 9              | 10         | 8                            | 8                          | 8                          | 10                          | 8                          |
| Peripheral artery disease                     | 11     | 11           | 10             | 10             | 9              | 10                        | 11                       | 8           | 11                     | 11                   | 11                    | 11                     | 11        | 11      | 10        | 11             | 11         | 11                           | 11                         | 11                         | 9                           | 11                         |









eFigure 5c.

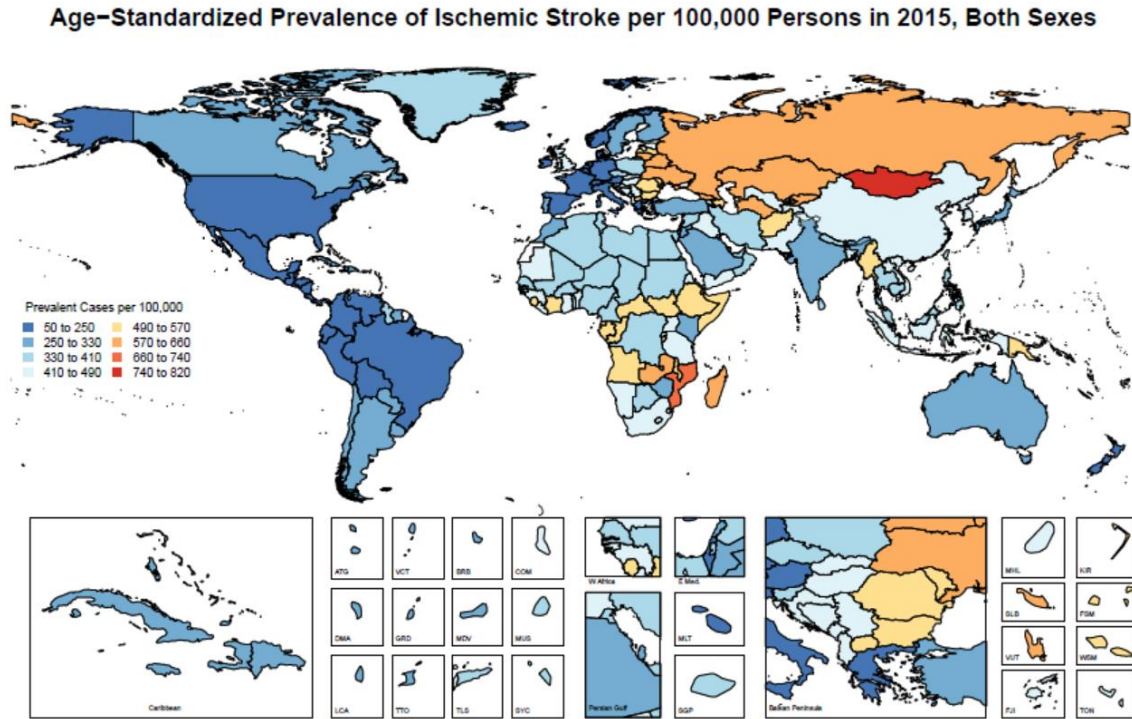

eFigure 5d.

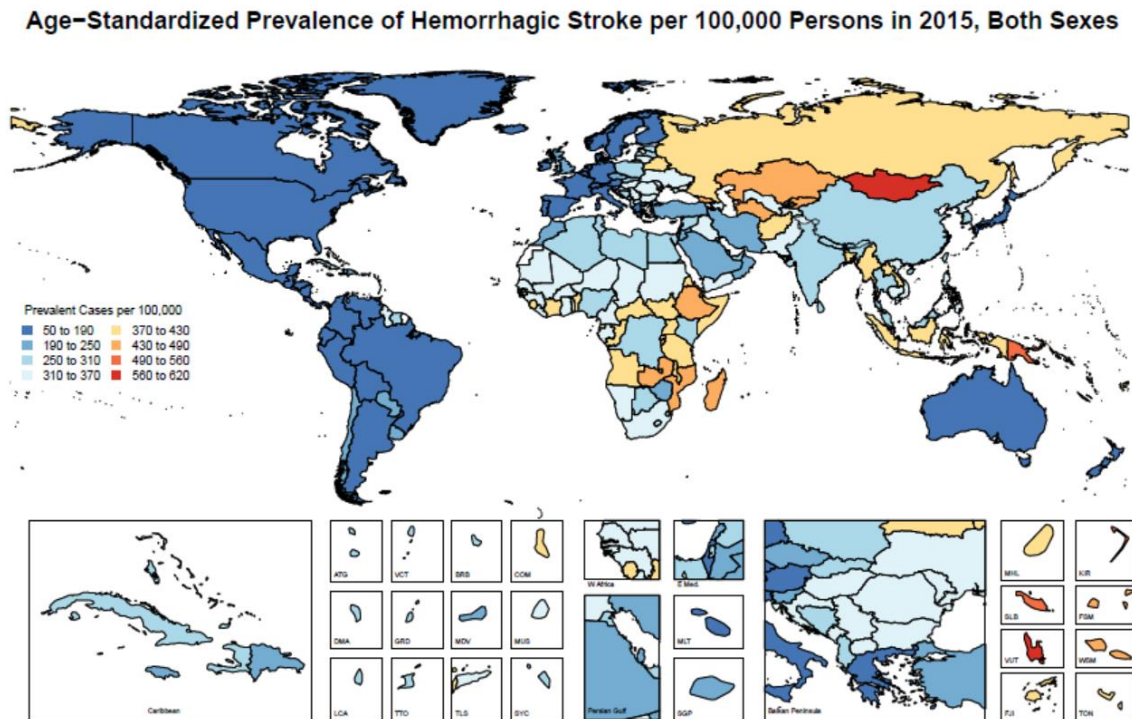

eFigure 6a.

**Age-Standardized Deaths due to Ischemic Heart Disease per 100,000 Persons in 2015, Both Sexes**

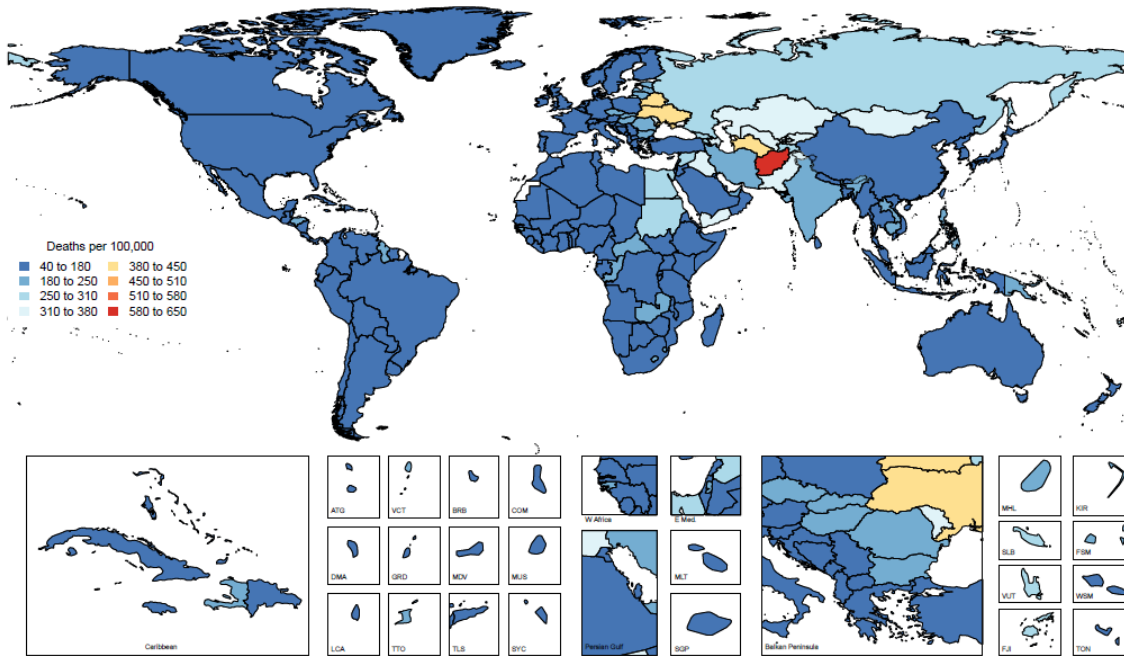

eFigure 6b.

**Age-Standardized Deaths due to Hypertensive Heart Disease per 100,000 Persons in 2015, Both Sexes**

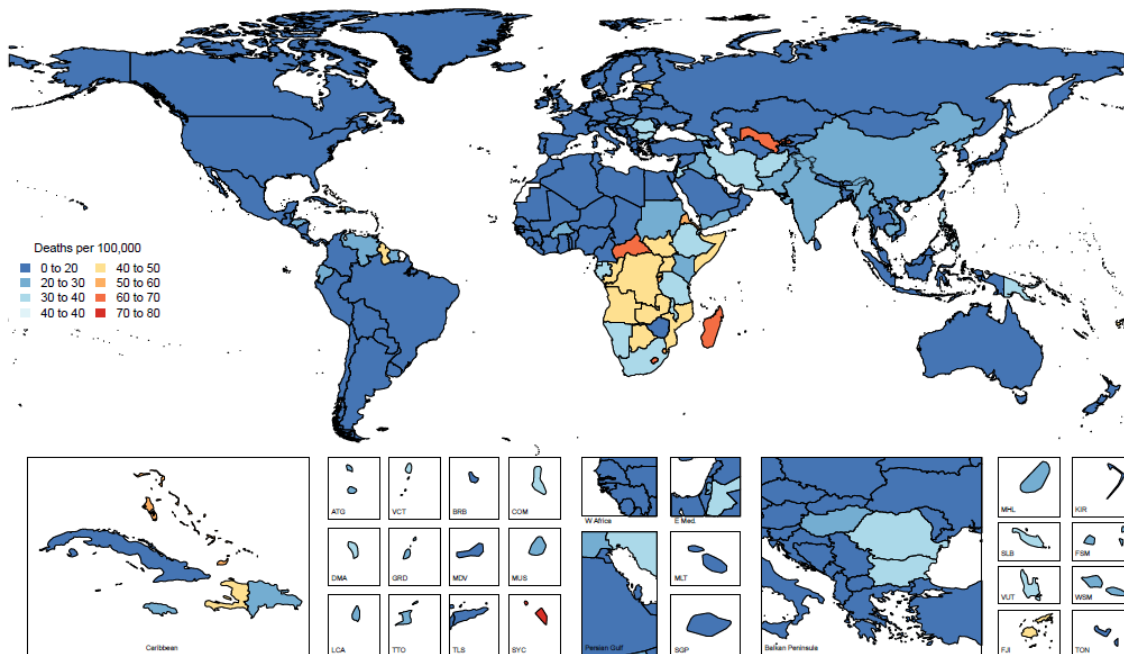

eFigure 6c.

Age-Standardized Deaths due to Ischemic Stroke per 100,000 Persons in 2015, Both Sexes

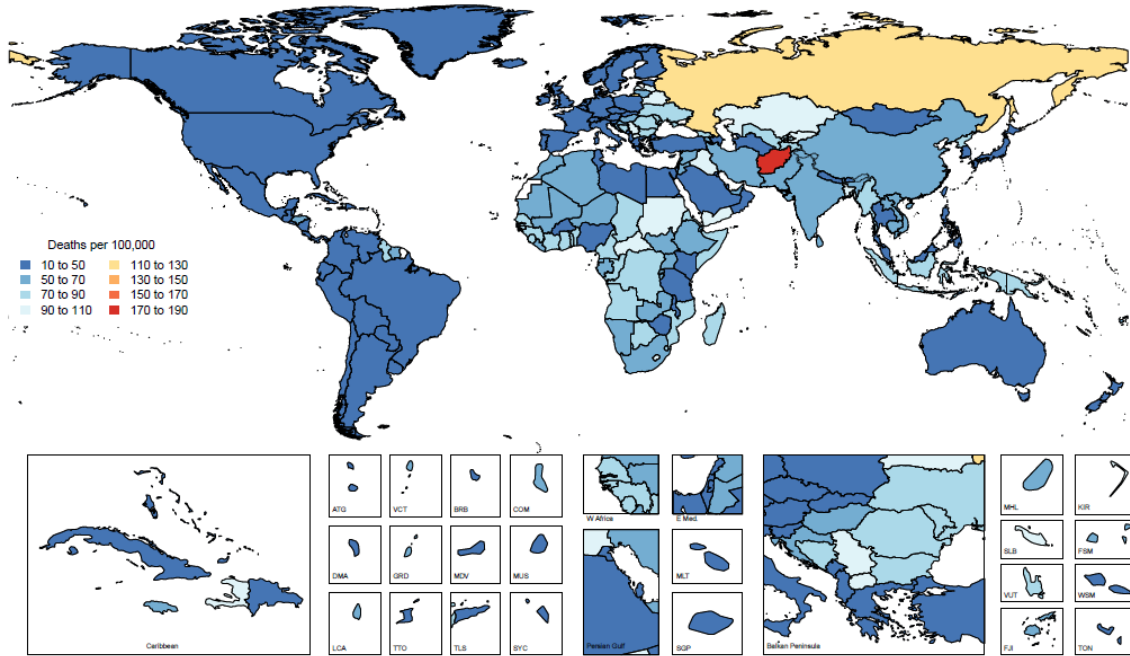

eFigure 6d.

Age-Standardized Deaths due to Hemorrhagic Stroke per 100,000 Persons in 2015, Both Sexes

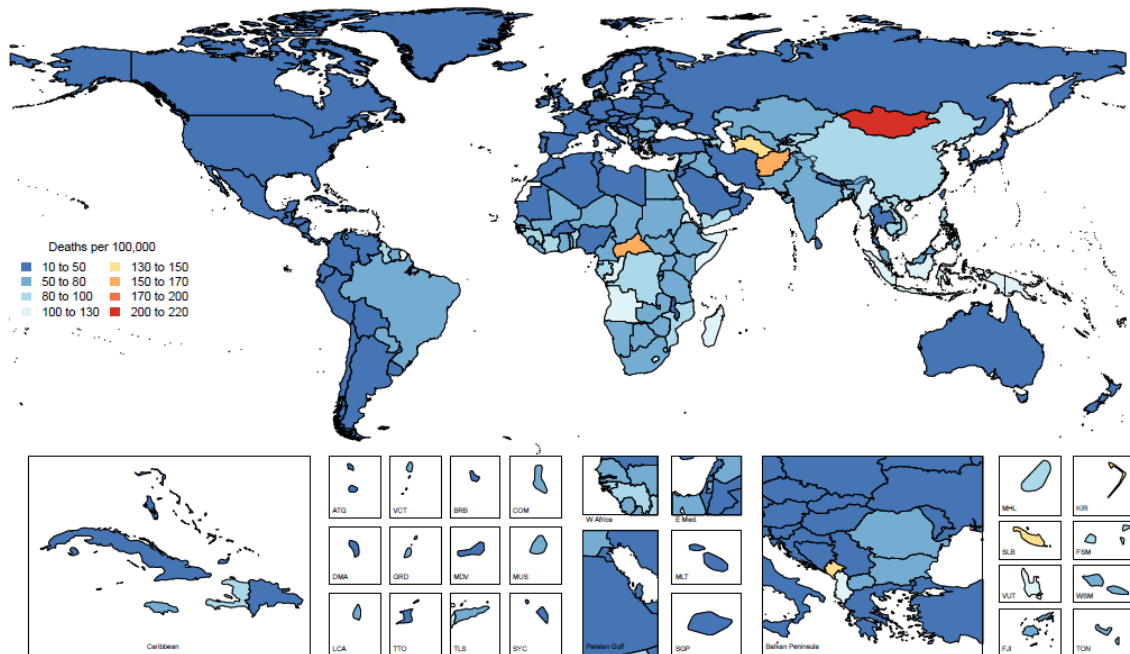



eFigure 7a.

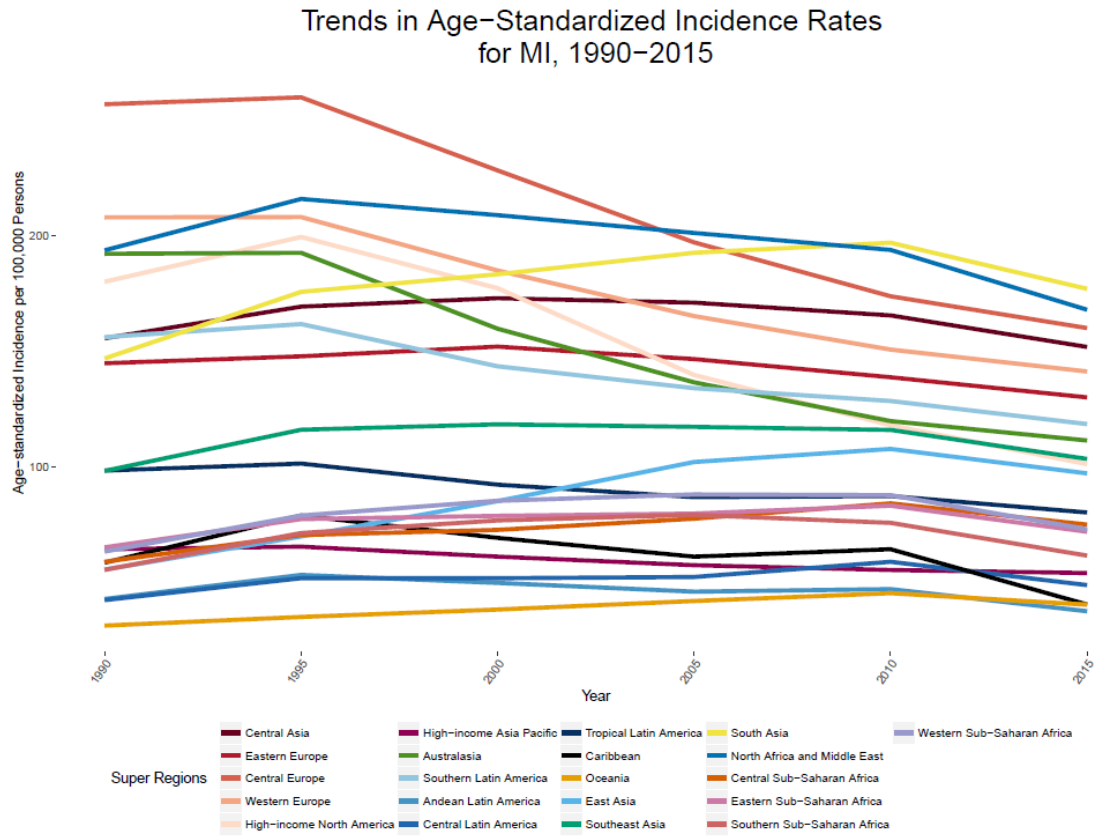

eFigure 7b.

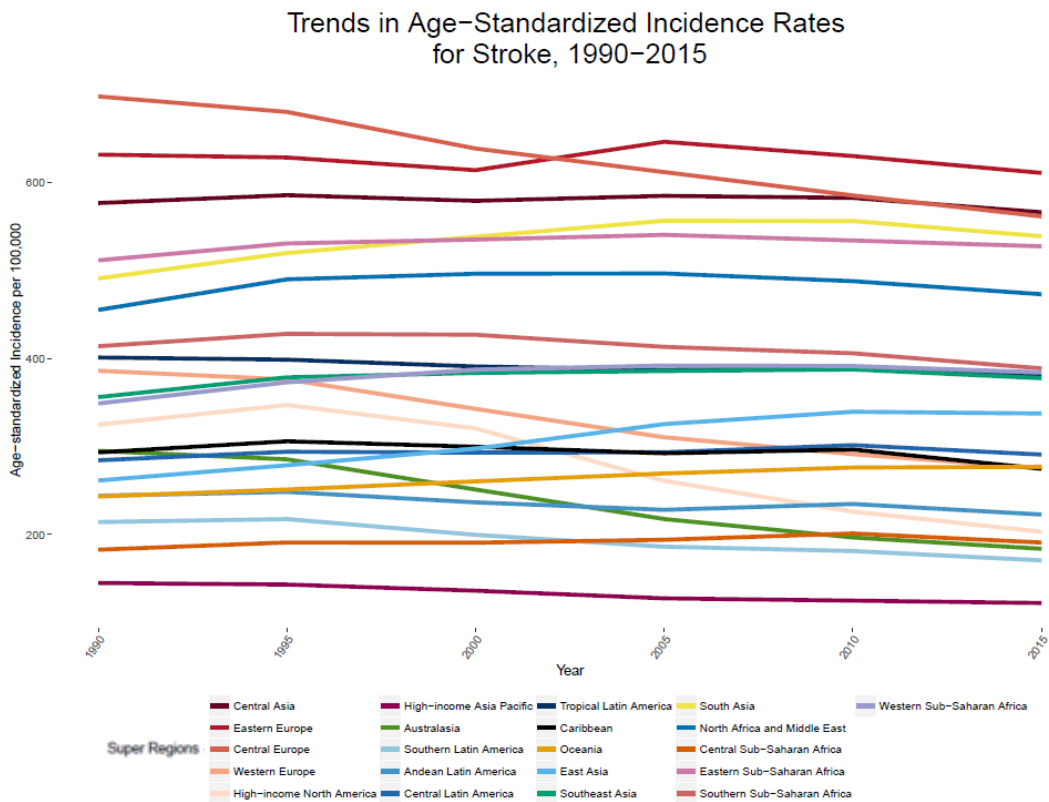

eFigure 8a.

**Age-Standardized Prevalence of All Cardiovascular Disease per 100,000 Persons in 2015, Females**

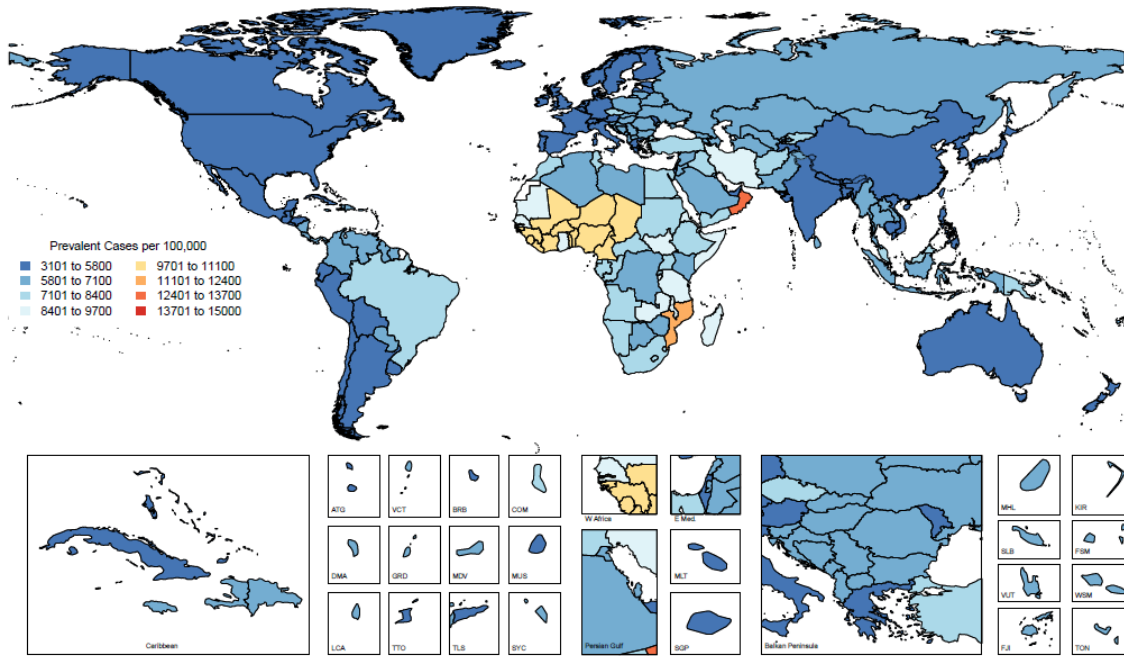

eFigure 8b.

**Age-Standardized All Cardiovascular Disease, Deaths per 100,000 Persons in 2015, Females**

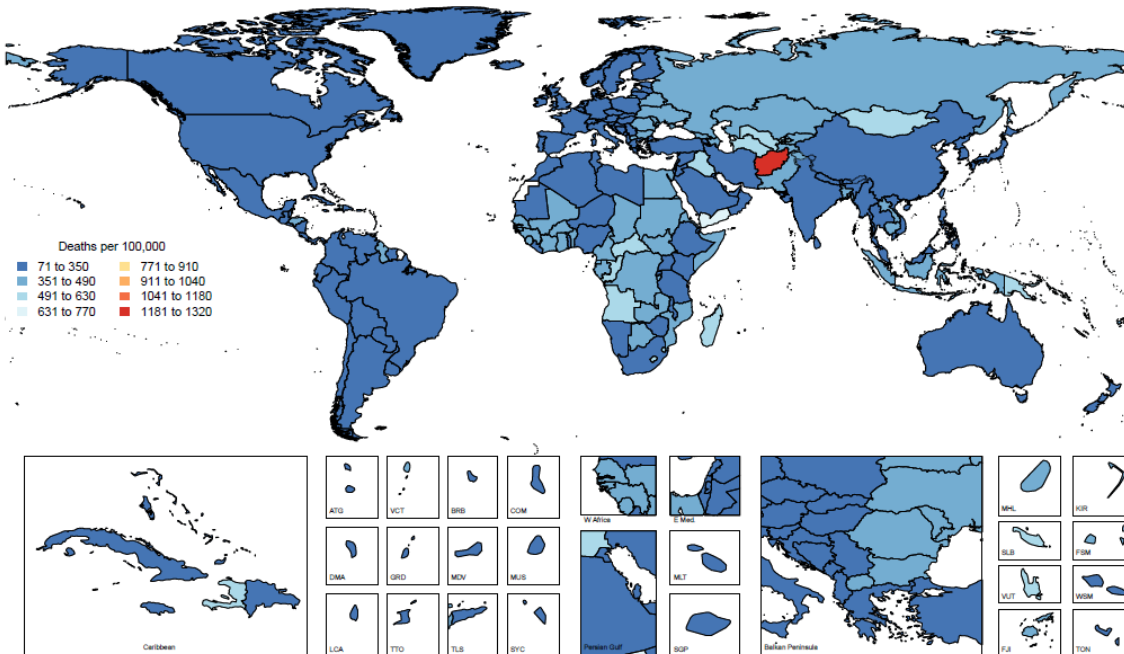



eFigure 9a.

**Age-Standardized Prevalence of All Cardiovascular Disease per 100,000 Persons in 2015, Males**

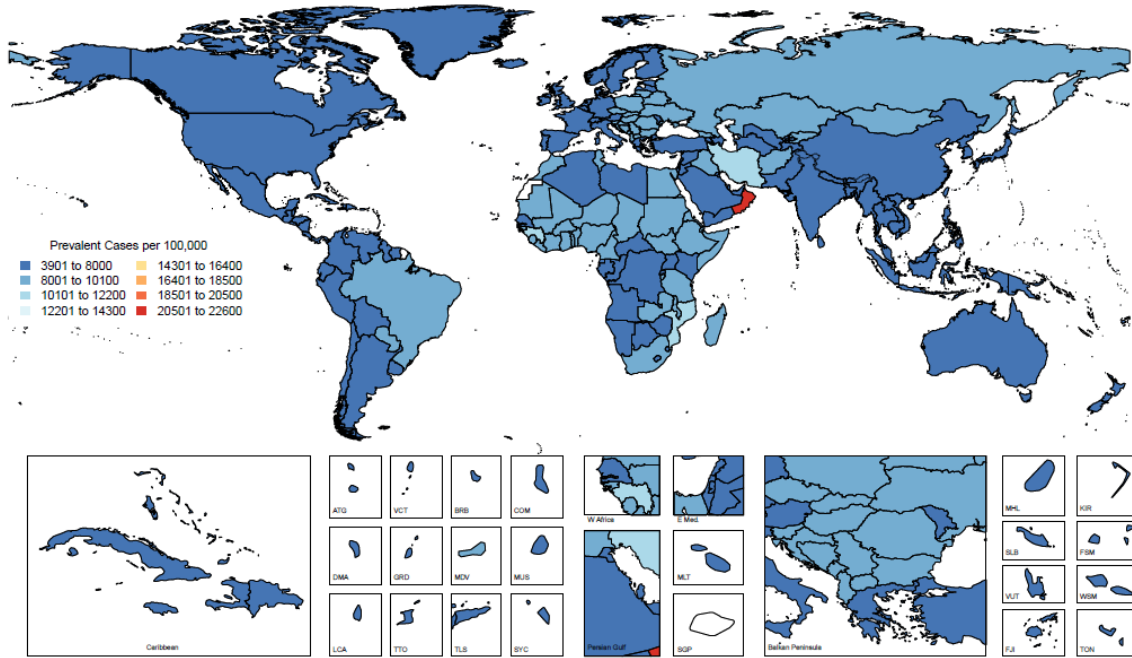

eFigure 9b.

**Age-Standardized All Cardiovascular Disease, Deaths per 100,000 Persons in 2015, Males**

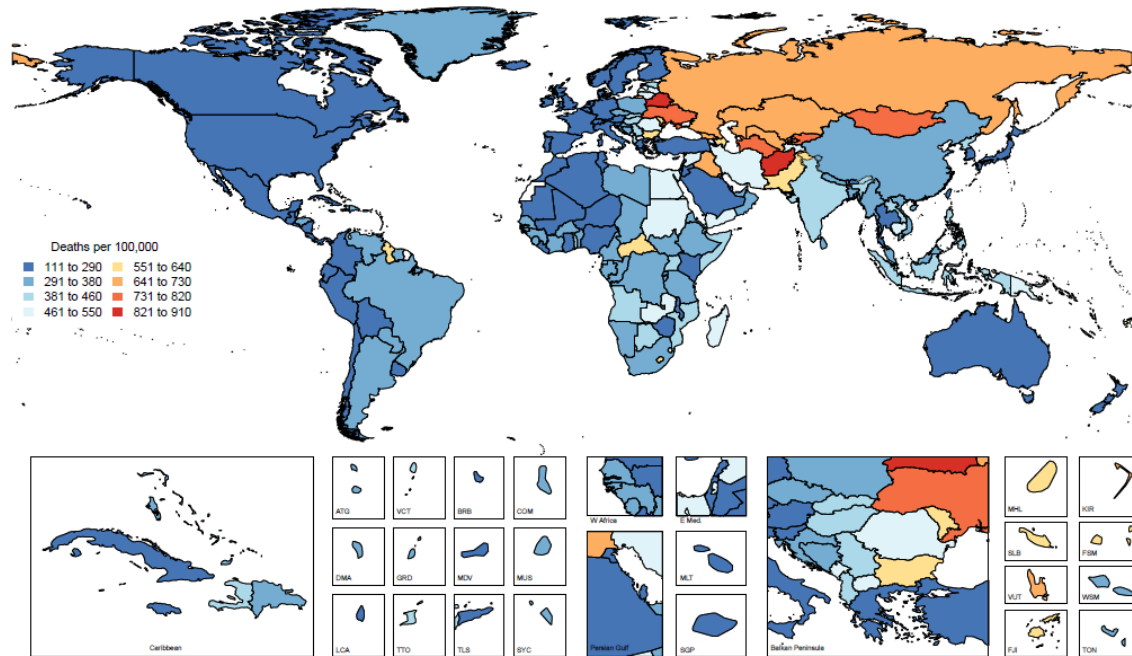

Supplement: mmc1.pdf [file mmc1.pdf]
